# Supplementary material for: Tetramate derivatives by chemoselective Dieckmann ring closure ofallo-phenylserines, and their antibacterial activity
Source: Royal Society of Chemistry journal article supplement (doi:10.1039/d3ob00376k), 2023-01-01

## Supporting Information

### Tetramate Derivatives by Chemoselective Dieckmann Ring Closure of *allo*-Phenylserines, and their Antibacterial Activity

Liban Saney,<sup>†</sup> Kirsten E. Christensen,<sup>†</sup> Miroslav Genov,<sup>‡</sup> Alexander Pretsch,<sup>‡</sup> Dagmar Pretsch,<sup>‡</sup> and Mark G. Moloney<sup>\*,†,#</sup>

<sup>†</sup>The Department of Chemistry, Chemistry Research Laboratory, University of Oxford, 12 Mansfield Road, Oxford. OX1 3TA

<sup>#</sup>Oxford Suzhou Centre for Advanced Research, Building A, 388 Ruo Shui Road, Suzhou Industrial Park, Jiangsu, 215123, P.R.China.

<sup>‡</sup>Oxford Antibiotic Group, The Oxford Science Park, Magdalen Centre, Oxford OX4 4GA, UK.

\*[mark.moloney@chem.ox.ac.uk](mailto:mark.moloney@chem.ox.ac.uk)

#### Table of Contents

|                                                                                                                                                                                                      |      |
|------------------------------------------------------------------------------------------------------------------------------------------------------------------------------------------------------|------|
| <b>Figure S1.</b> Single-crystal X-ray structure of compounds <b>9a</b> , <b>11a</b> , <b>13a</b> , <b>13b</b> , <b>23a</b> , <b>23d</b>                                                             | S-3  |
| <b>Figure S2.</b> <sup>1</sup> H-NMR spectra of tetramate <b>14a</b>                                                                                                                                 | S-4  |
| <b>Figure S3.</b> <sup>1</sup> H-NMR spectra of C7-carboxamide <b>23a</b>                                                                                                                            | S-5  |
| <b>Figure S4.</b> <sup>1</sup> H-NMR spectra of C7-acyltetramate <b>25d</b>                                                                                                                          | S-6  |
| <b>Figure S5.</b> Chemical property space of bicyclic tetramates                                                                                                                                     | S-7  |
| <b>Table S1:</b> <sup>1</sup> H-NMR data and yields of keto-enol tautomeric mixtures of $\beta$ -oxoesters <b>5b-g</b>                                                                               | S-8  |
| <b>Table S2.</b> <sup>13</sup> C-NMR data of <b>5a-g</b> and <b>6a-g</b>                                                                                                                             | S-9  |
| <b>Table S3.</b> Key chemical shifts ( $\delta$ ), coupling constants ( $J$ ) and yields of <i>allo</i> - $\beta$ -arylserines <b>7a-f</b>                                                           | S-9  |
| <b>Table S4.</b> Comparison of literature <sup>1</sup> H-NMR data for oxazolidinone <b>8</b>                                                                                                         | S-9  |
| <b>Table S5:</b> Key chemical shifts ( $\delta$ ), coupling constants ( $J$ ), diastereomeric ratio (dr) and yields of oxazolidines <b>10a-f</b>                                                     | S-10 |
| <b>Table S6:</b> Key chemical shifts ( $\delta$ ) and coupling constants ( $J$ ) of the major malonamide diastereomer including the diastereomeric ratio (dr) and yields of malonamides <b>11a-f</b> | S-10 |
| <b>Table S7:</b> Key chemical shifts ( $\delta$ ), coupling constants ( $J$ ) and yields of tetramates <b>14a-f</b>                                                                                  | S-10 |
| <b>Table S8:</b> Key chemical shifts ( $\delta$ ) and yields of tetramates <b>22a-f</b>                                                                                                              | S-11 |
| <b>Table S9:</b> Key <sup>13</sup> C-NMR chemical shift values ( $\delta$ ) of the tautomeric forms of C7-carboxamides <b>23a-f</b>                                                                  | S-11 |

|                                                                                                                                                                            |         |
|----------------------------------------------------------------------------------------------------------------------------------------------------------------------------|---------|
| <b>Table S10:</b> Key chemical shifts ( $\delta$ ) and yields of C7-acyltetramates <b>25a-s</b>                                                                            | S12-13  |
| <b>Table S11:</b> Yields and key chemical shifts of Boc-protected- <i>allo</i> -phenylserines <b>9a-m</b>                                                                  | S-14    |
| <b>Table S12:</b> Key chemical shifts, coupling constants and yields of amino esters <b>28a-k</b>                                                                          | S-15    |
| <b>Table S13:</b> Key chemical shifts ( $\delta$ ), coupling constants ( $J$ ), diastereomeric ratio (dr) and yields of oxazolidines <b>10a, g-p</b>                       | S-15    |
| <b>Table S14:</b> Key chemical shifts ( $\delta$ ) and coupling constants ( $J$ ) of the major malonamide diastereomer including the yields of malonamides <b>11a, g-p</b> | S-16    |
| <b>Table S15:</b> Key chemical shifts ( $\delta$ ), coupling constants ( $J$ ) and yields of tetramates <b>14a, g-p</b>                                                    | S-16    |
| <b>Table S16:</b> Physicochemical properties of bicyclic tetramates                                                                                                        | S-17-20 |
| Experimental procedures and data                                                                                                                                           | S-21    |
| References                                                                                                                                                                 | S-93    |
| NMR Spectra                                                                                                                                                                | S-95    |

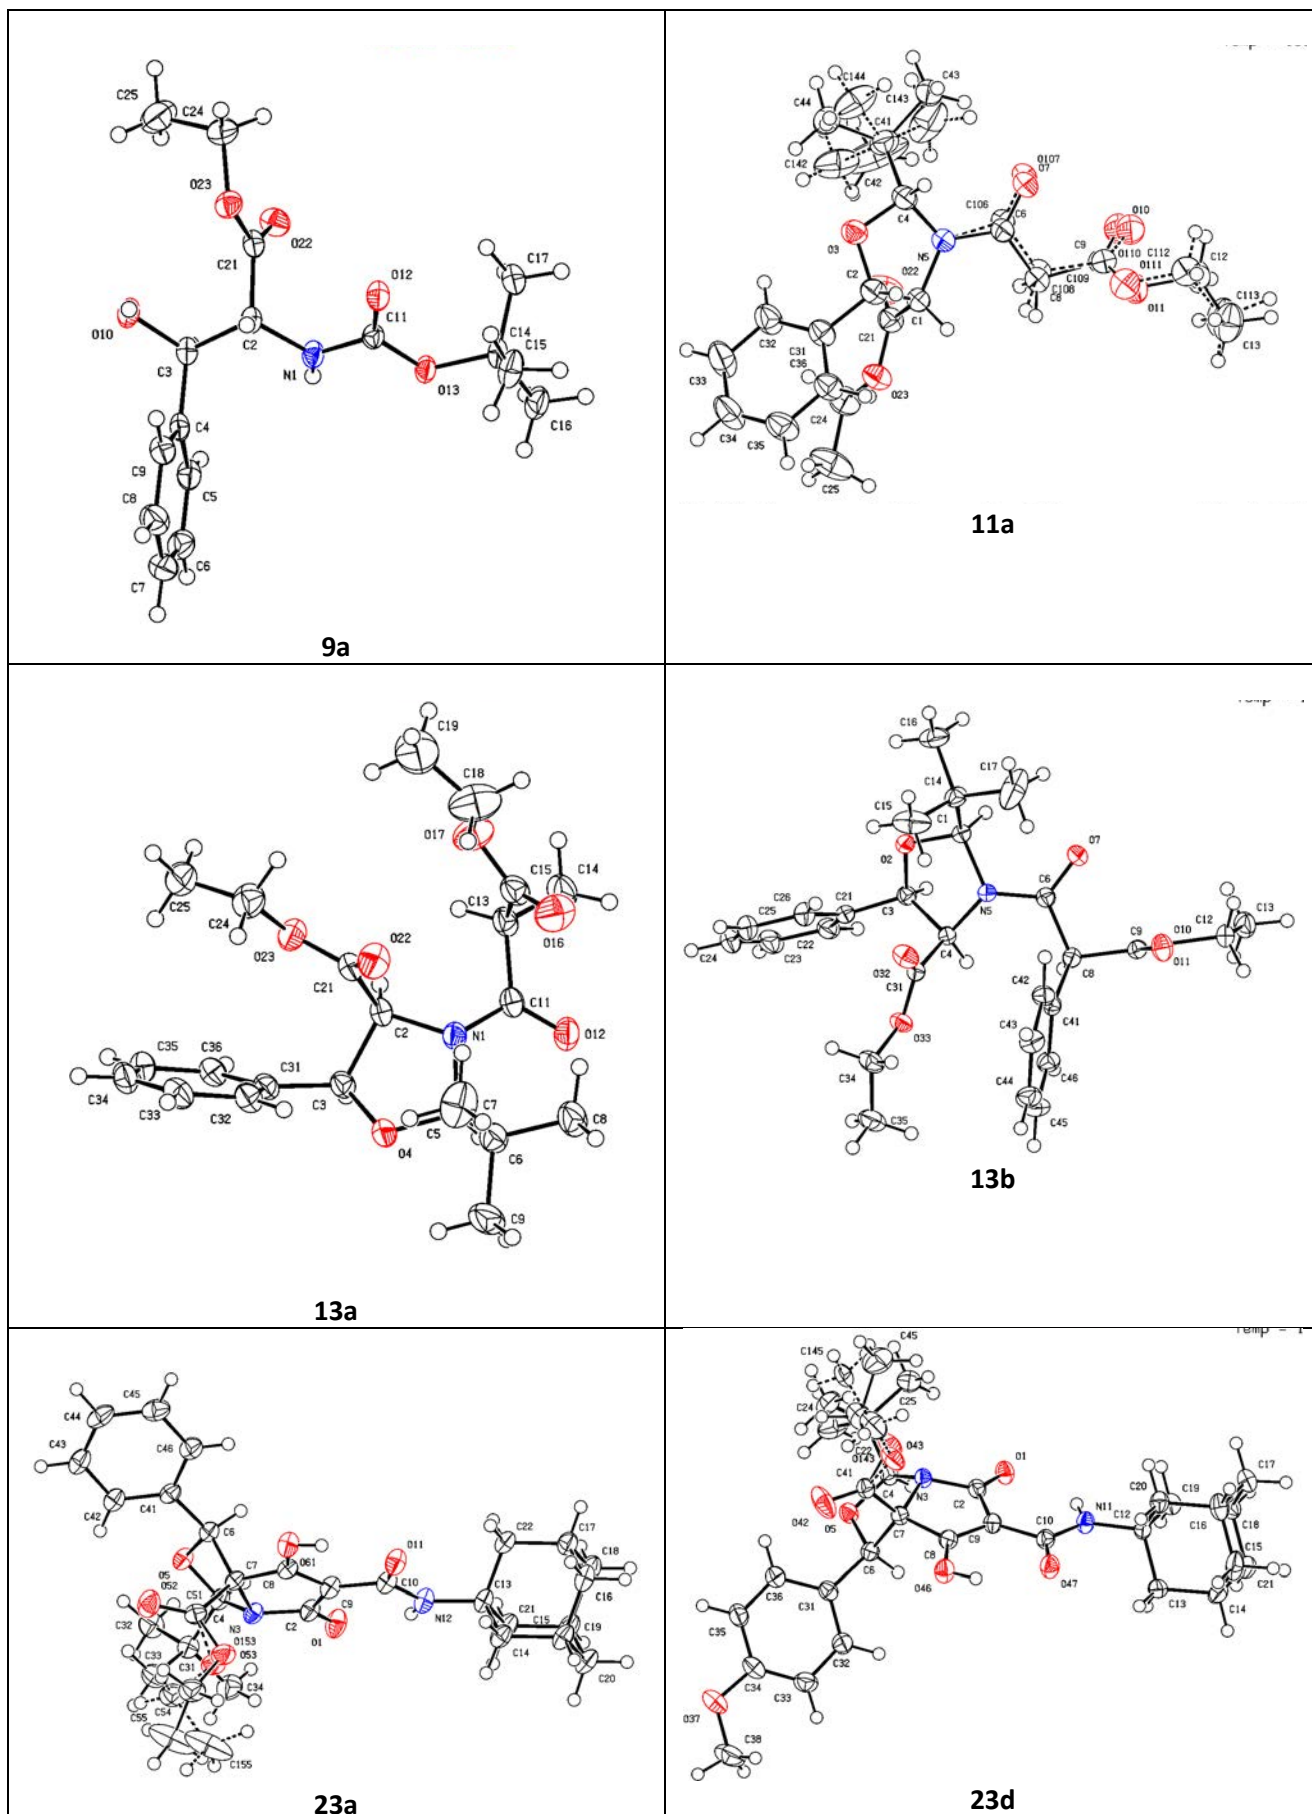

**Figure S1:** Single-crystal X-ray structure of compounds **9a**, **11a**, **13a**, **13b**, **23a**, **23d**.

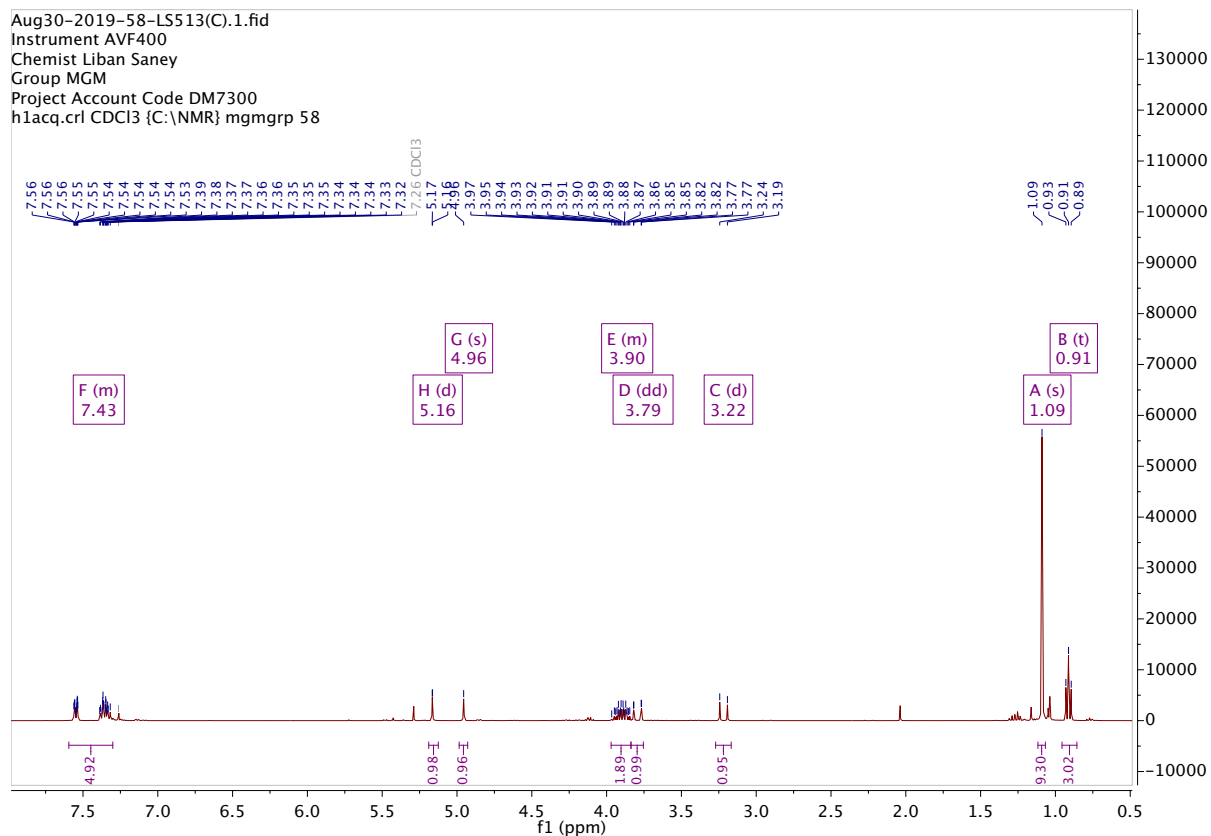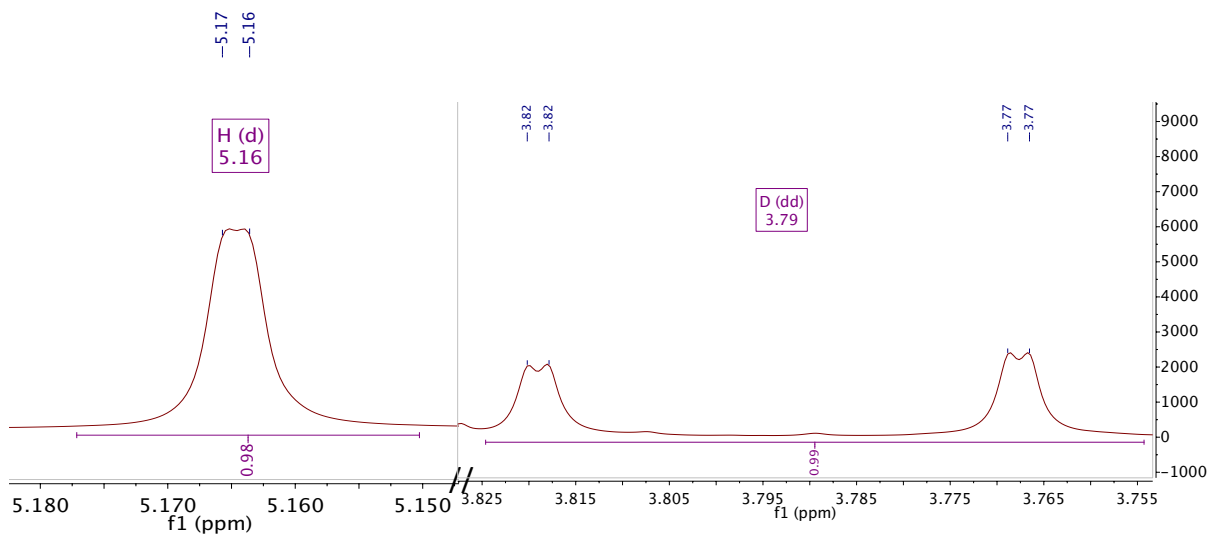

**Figure S2:** <sup>1</sup>H-NMR spectrum of tetramate **14a**, showing the relative purity of the crude material and the long-range coupling observed between the H2 and H7-protons, with a weak coupling constant of 0.8 Hz observed between these two peaks; CDCl<sub>3</sub> solvent, 400 MHz.

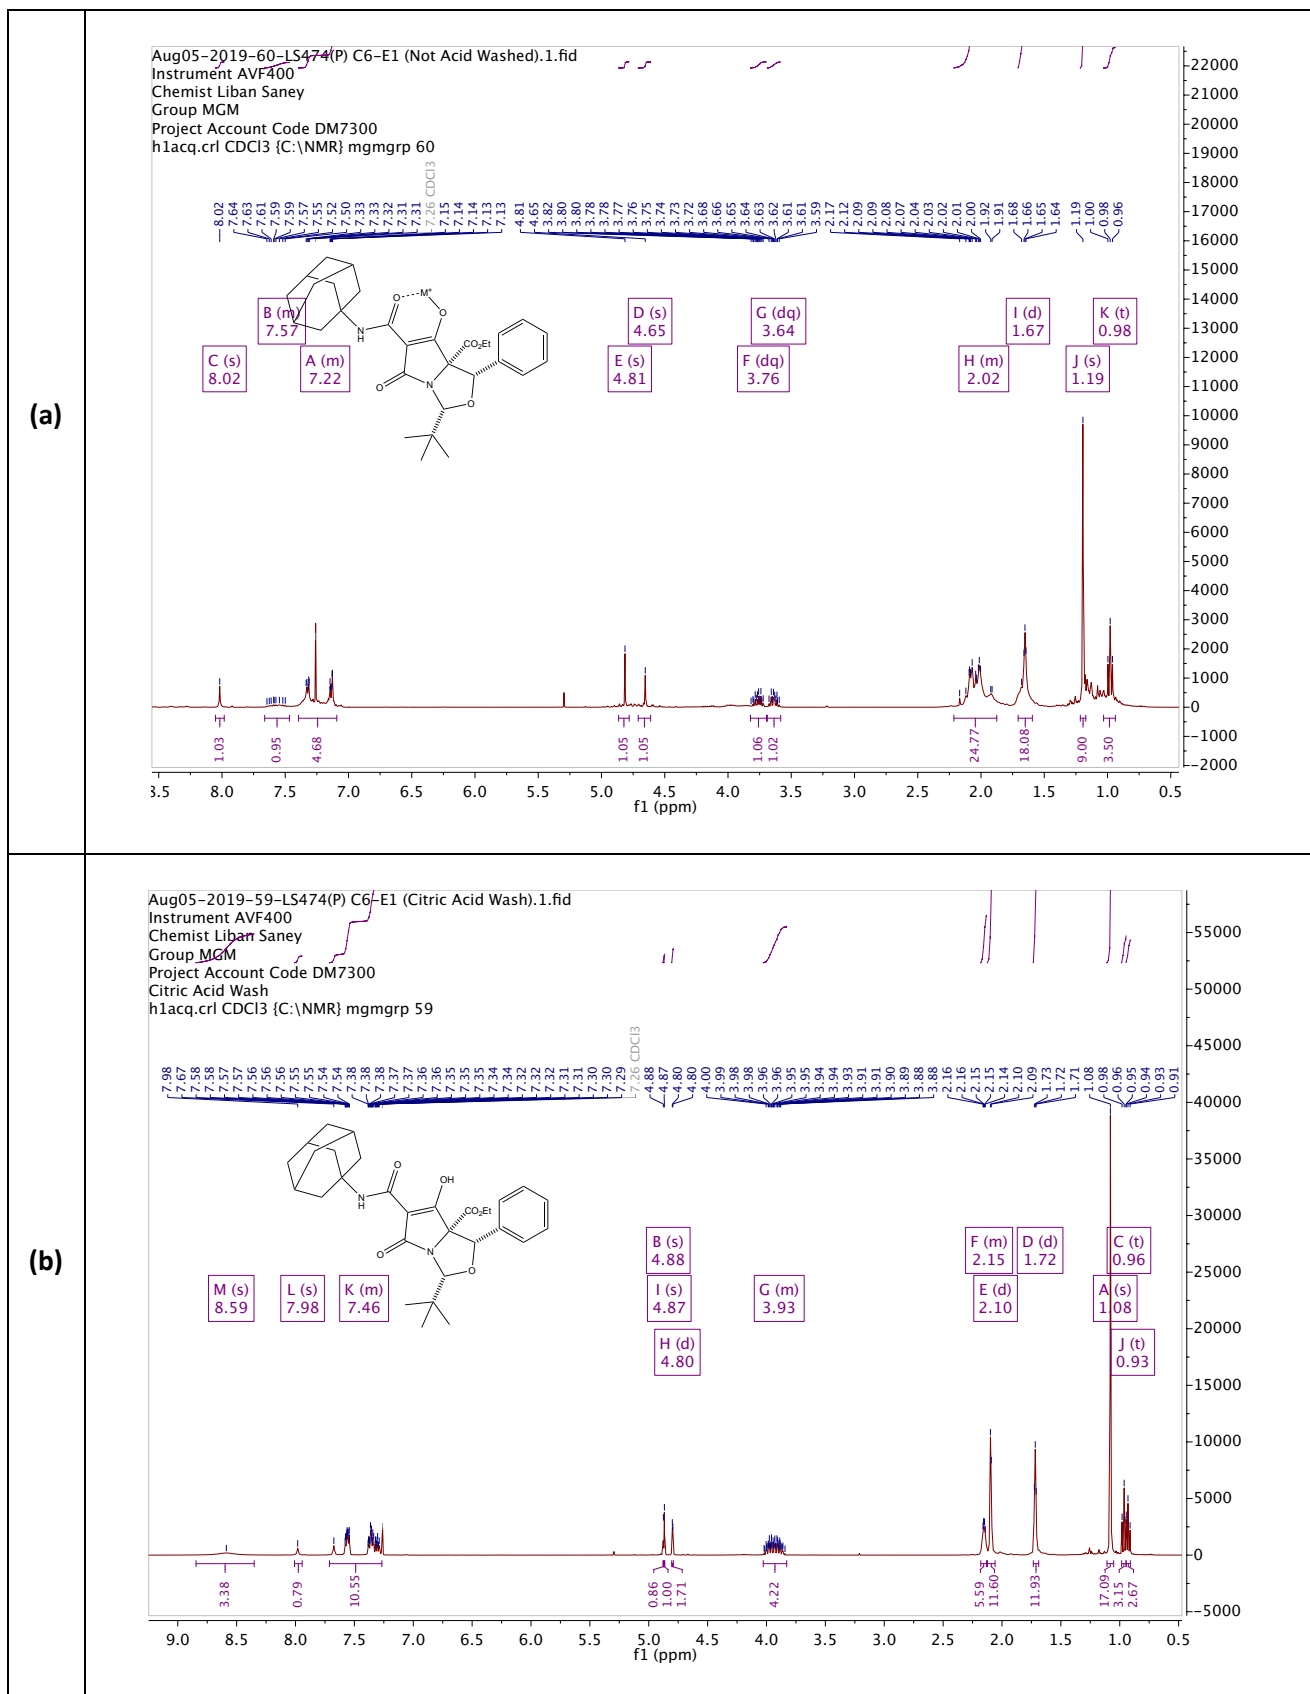

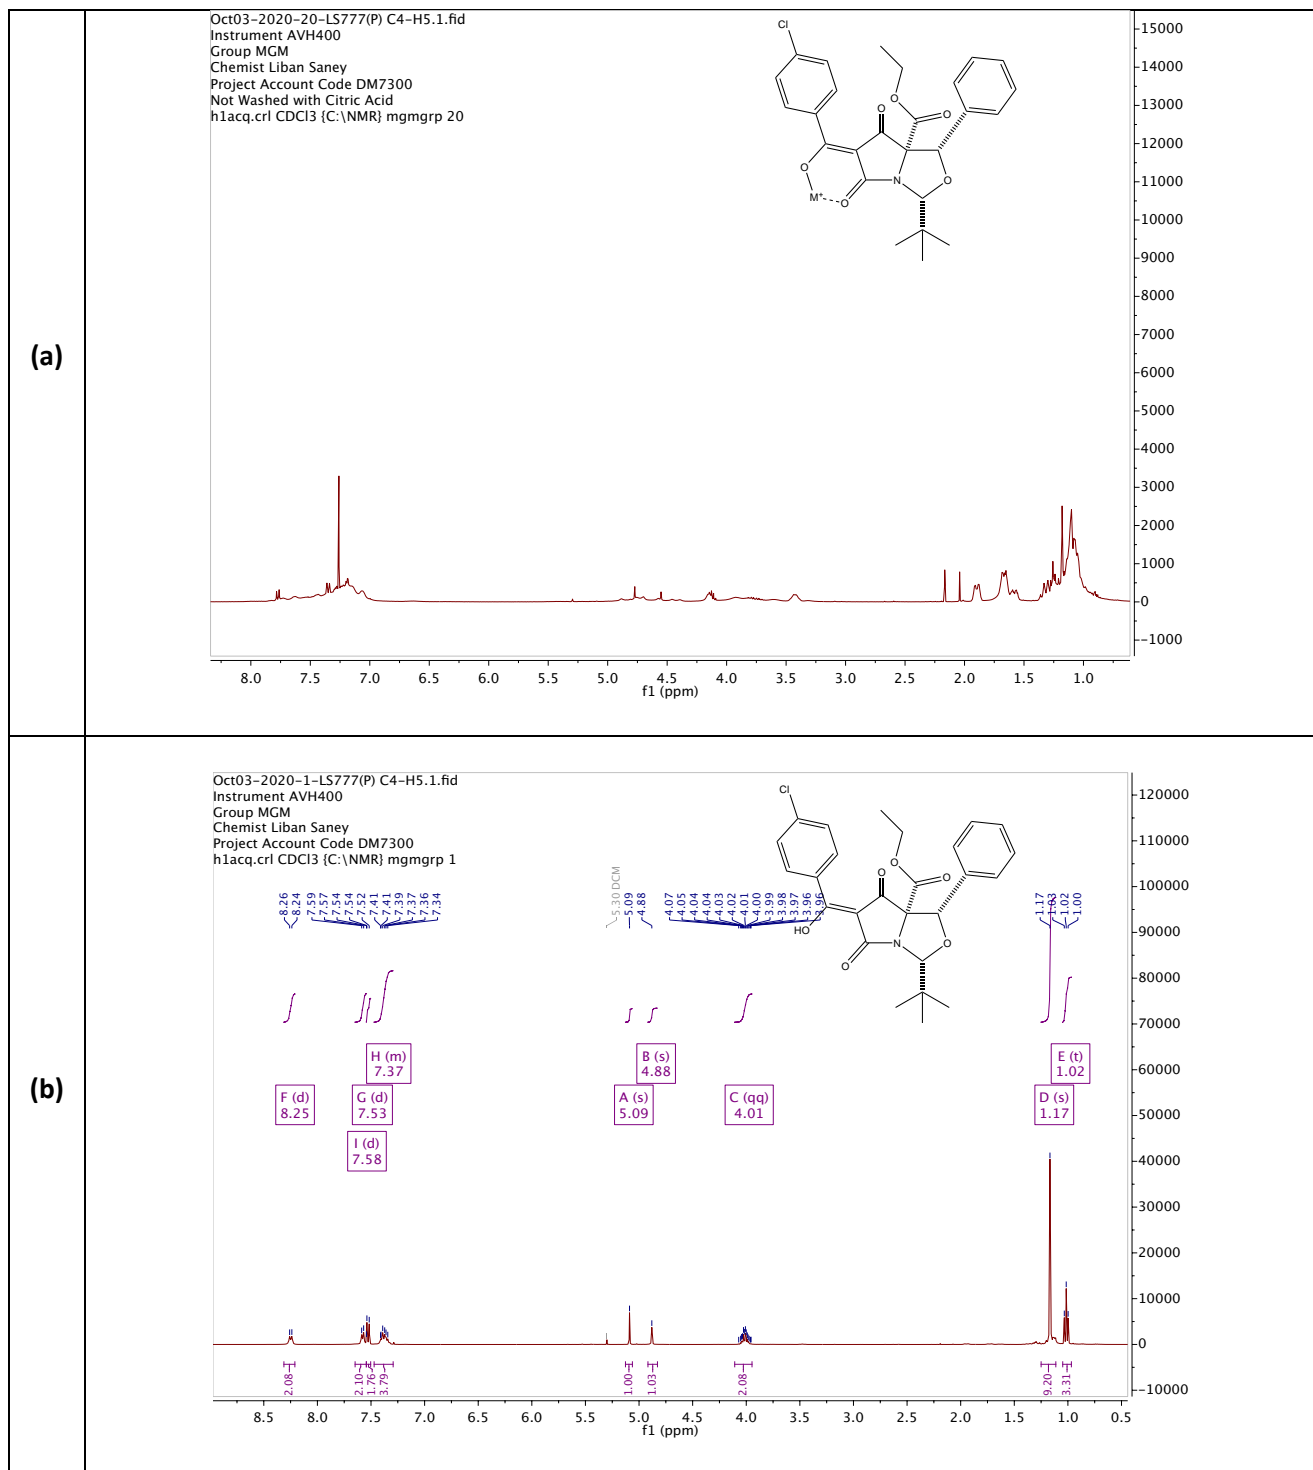

**Figure S4:**  $^1\text{H-NMR}$  spectrum of C7-acyltetramate **25d** post-chromatographic purification, before **(a)** acid wash and **(b)** after 10% citric acid (aq.) wash;  $^a$   $\text{CDCl}_3$  solution, 400 MHz.

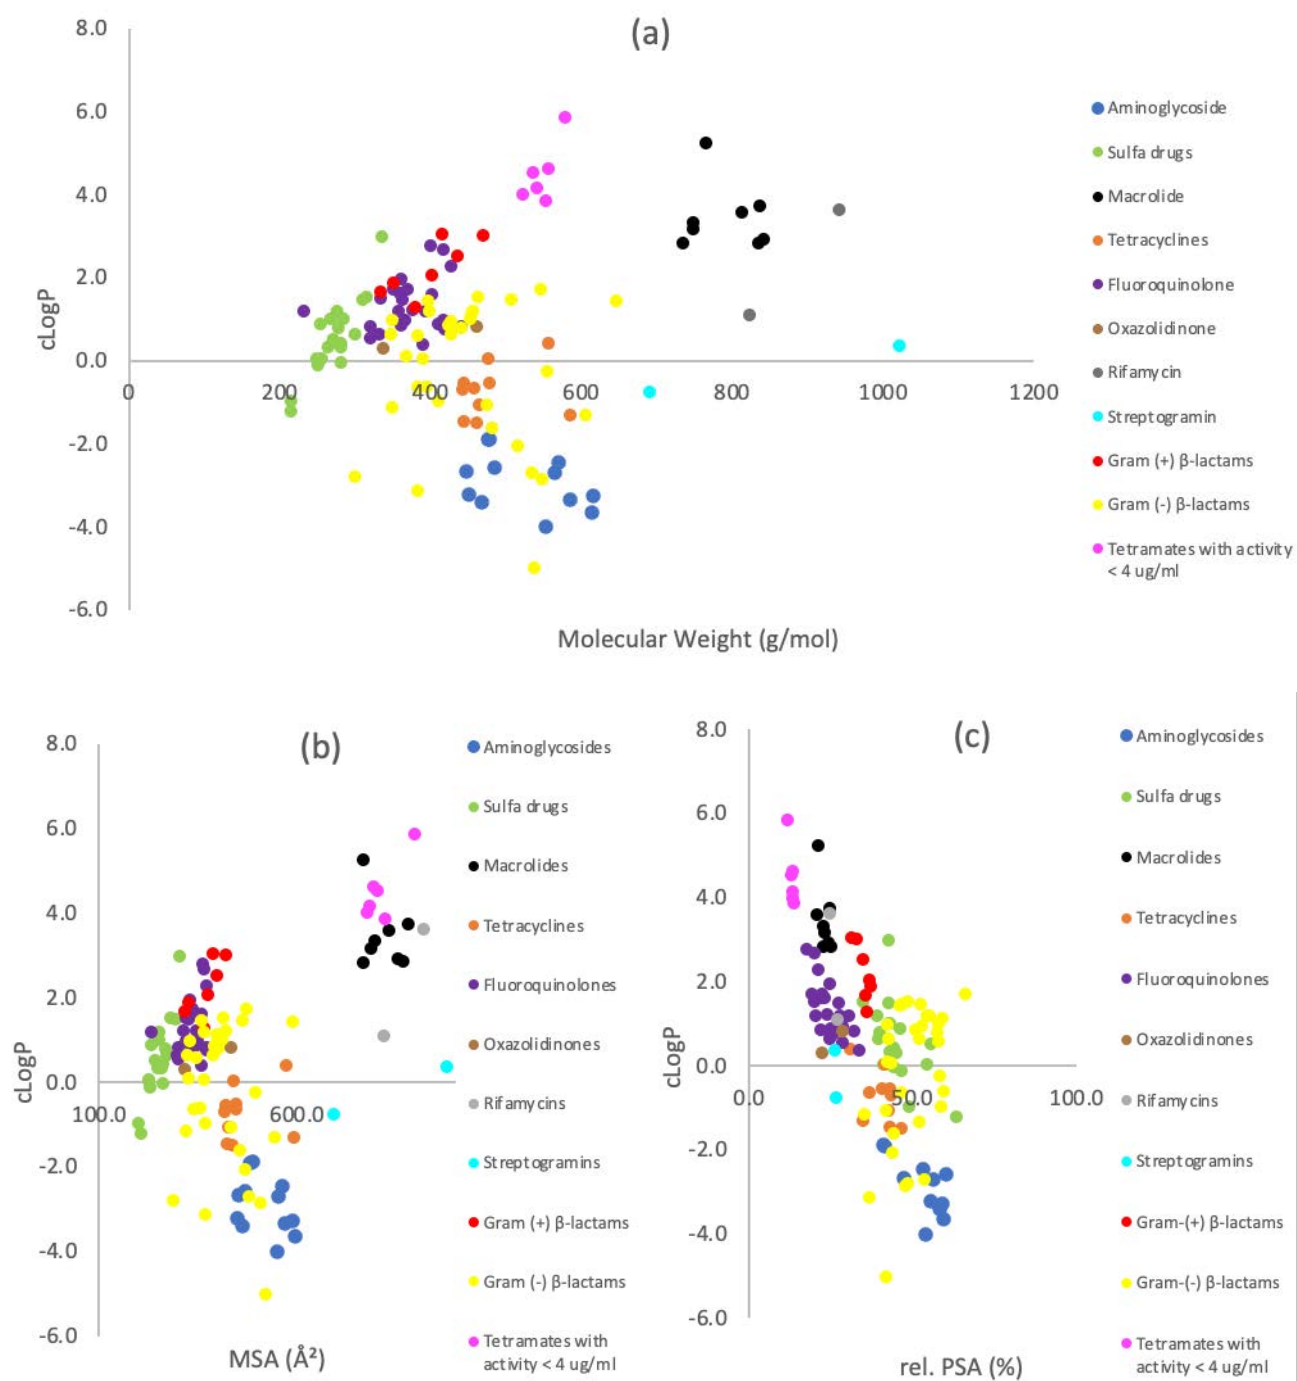

**Figure S5:** Chemical property space of bicyclic tetramates in comparison to known antibiotics. **(a)** cLogP plotted against  $M_w$ ; **(b)** cLogP plotted against MSA and **(c)** cLogP plotted against rel. PSA; cLogP, MSA and PSA for tetramates were calculated using Marvin (19.9.0), 2019, ChemAxon. The remaining data was collected from *J. Med. Chem.*, 2008, **51**, 2871-2878.

| Compound  | $\delta_{\text{keto}}$<br>(ppm)                                                                                                                                                       | $\delta_{\text{enol}}$<br>(ppm)                                                                                                 | Ratio between<br>keto:enol <sup>a</sup> | Yield<br>(%) |
|-----------|---------------------------------------------------------------------------------------------------------------------------------------------------------------------------------------|---------------------------------------------------------------------------------------------------------------------------------|-----------------------------------------|--------------|
| <b>5b</b> | 1.26 (3H, t, $J=7.1$ Hz), 2.42 (3H, s), 3.97 (2H, s),<br>4.22 (2H, q, $J=7.2$ Hz), 7.28 (2H, d, $J=8.1$ Hz), 7.85<br>(2H, d, $J=8.3$ Hz)                                              | 1.34 (3H, t, $J=7.1$ Hz), 2.39 (3H, s), 4.27<br>(2H, m), 5.64 (1H, s), 7.28-8.00 (4H, m),<br>12.59 (1H, s)                      | 5.5:1                                   | Quant.       |
| <b>5c</b> | 0.94 (3H, m), 1.26 (3H, t, $J=7.1$ Hz), 1.36 (2H, m),<br>1.62 (2H, m), 2.67 (2H, m), 3.97 (2H, s), 4.22 (2H,<br>q, $J=7.1$ Hz), 7.28 (2H, d, $J=8.3$ Hz), 7.86 (2H, d,<br>$J=8.3$ Hz) | 0.94 (3H, m), 1.26-1.42 (5H, m), 1.62 (2H,<br>m), 2.67 (2H, m), 4.28 (2H, m), 5.64 (1H,<br>s), 7.23-8.04 (4H, m), 12.58 (1H, s) | 2.8:1                                   | Quant.       |
| <b>5d</b> | 1.24 (3H, t, $J=7.1$ Hz), 3.86 (3H, s), 3.93 (2H, s),<br>4.19 (2H, q, $J=7.1$ Hz) 6.93 (2H, d, $J=8.9$ Hz), 7.91<br>(2H, d, $J=8.9$ Hz)                                               | 1.31 (3H, t, $J=7.1$ Hz), 3.86 (3H, s), 4.25<br>(2H, m), 5.56 (1H, s), 6.93-8.05 (4H, m),<br>12.62 (1H, s)                      | 13:1                                    | Quant.       |
| <b>5e</b> | 1.24 (3H, t, $J=7.1$ Hz), 3.95 (2H, s), 4.20 (2H, q,<br>$J=7.1$ Hz), 7.14 (2H, app t, $J=8.9$ Hz), 7.97 (2H, dd,<br>$J=5.3$ Hz, 8.9 Hz)                                               | 1.32 (3H, t, $J=7.1$ Hz), 4.26 (2H, m), 5.59<br>(1H, s), 7.06-8.10 (4H, m), 12.60 (1H, s)                                       | 4.9:1                                   | Quant.       |
| <b>5f</b> | 1.18 (3H, t, $J=7.1$ Hz), 3.88 (2H, s), 4.13 (2H, q,<br>$J=7.1$ Hz), 7.38 (2H, d, $J=8.6$ Hz), 7.81 (2H, d,<br>$J=8.7$ Hz)                                                            | 1.26 (3H, t, $J=7.1$ Hz), 4.19 (2H, m), 5.56<br>(1H, s), 7.31-7.81 (4H, m), 12.50 (1H, s)                                       | 3.2:1                                   | Quant.       |
| <b>5g</b> | 1.25 (3H, t, $J=7.1$ Hz), 3.95 (2H, s), 4.20 (2H, q,<br>$J=7.1$ Hz), 7.62 (2H, d, $J=8.6$ Hz), 7.80 (2H, d,<br>$J=8.6$ Hz)                                                            | 1.33 (3H, t, $J=7.1$ Hz), 4.26 (2H, m), 5.63<br>(1H, s), 7.53-7.81 (4H, m), 12.55 (1H, s)                                       | 2.7:1                                   | 91           |

**Table S1:** <sup>1</sup>H-NMR data and yields of keto-enol tautomeric mixtures of  $\beta$ -oxoesters **5b-g**; CDCl<sub>3</sub> solvent, 400 MHz; <sup>a</sup> Determined from <sup>1</sup>H-NMR studies of the crude material.



| Compound  | R <sup>1</sup> | $\delta_{\text{keto C2}}$<br>(ppm) <sup>a</sup> | Compound  | Major isomer<br>$\delta$ C2 (ppm) <sup>a</sup> | <i>E/Z</i> ratio of<br>isomers <sup>a</sup> | Yield<br>(%) |
|-----------|----------------|-------------------------------------------------|-----------|------------------------------------------------|---------------------------------------------|--------------|
| <b>5a</b> | H              | 46.1                                            | <b>6a</b> | 149.6                                          | 21:1                                        | 71           |
| <b>5b</b> | Me             | 46.1                                            | <b>6b</b> | 149.8                                          | 17:1                                        | 73           |
| <b>5c</b> | Bu             | 46.1                                            | <b>6c</b> | 149.4                                          | 3.8:1                                       | 83           |
| <b>5d</b> | OMe            | 45.9                                            | <b>6d</b> | 150.0                                          | 5.7:1                                       | 93           |
| <b>5e</b> | F              | 46.1                                            | <b>6e</b> | 149.5                                          | 3.6:1                                       | 73           |
| <b>5f</b> | Cl             | 46.1                                            | <b>6f</b> | 149.4                                          | 3:1                                         | 78           |
| <b>5g</b> | Br             | 46.1                                            | <b>6g</b> | 149.4                                          | 3.5:1                                       | 86           |

**Table S2:** <sup>13</sup>C-NMR data of **5a-g** and **6a-g** at the C2-position, *E/Z* isomeric ratio and yields of oximes **6a-g**; CDCl<sub>3</sub> solvent, 400 MHz; <sup>a</sup> Determined from <sup>1</sup>H-NMR studies of the crude material.

| Compound               | R <sup>1</sup> | $\delta$ H2 (ppm) | $\delta$ H3 (ppm) | <i>J</i> <sub>H2-H3</sub> (Hz) | Yield (%) |
|------------------------|----------------|-------------------|-------------------|--------------------------------|-----------|
| <b>7a</b> <sup>a</sup> | H              | 4.44              | 5.36              | 4.2                            | 75        |
| <b>7b</b> <sup>a</sup> | Me             | 4.46              | 5.38              | 4.2                            | 27        |
| <b>7c</b> <sup>b</sup> | Bu             | 4.31              | 5.27              | 3.8                            | 72        |
| <b>7d</b> <sup>a</sup> | OMe            | 4.46              | 5.37              | 4.3                            | 67        |
| <b>7e</b> <sup>a</sup> | F              | 4.50              | 5.43              | 4.1                            | 66        |
| <b>7f</b> <sup>a</sup> | Cl             | 4.51              | 5.42              | 4.0                            | 45        |

**Table S3:** Key chemical shifts ( $\delta$ ), coupling constants (*J*) and yields of *allo*- $\beta$ -arylsesines **7a-f**; <sup>a</sup> D<sub>2</sub>O solvent, 400 MHz; <sup>b</sup> CD<sub>3</sub>OD solvent, 400 MHz.

| Compound                                                                   | $\delta$ H4 (ppm) | $\delta$ H5 (ppm) | <i>J</i> <sub>H4-H5</sub> (Hz) |
|----------------------------------------------------------------------------|-------------------|-------------------|--------------------------------|
| <b>8</b> <sup>a</sup>                                                      | 5.83              | 4.66              | 9.1                            |
| Literature data for <i>threo</i> -<br>derived oxazolidinone <sup>b</sup>   | 5.62              | 4.25              | 5.0                            |
| Literature data for <i>erythro</i> -<br>derived oxazolidinone <sup>b</sup> | 5.80              | 4.64              | 9.1                            |

**Table S4:** Comparison of literature <sup>1</sup>H-NMR data<sup>1</sup> for oxazolidinone **8**; <sup>a</sup> CDCl<sub>3</sub> solvent, 400 MHz; <sup>b</sup> CDCl<sub>3</sub> solvent, 300 MHz.

| Compound   | 2,5- <i>cis</i> oxazolidine |                   |                   |                  | 2,5- <i>trans</i> oxazolidine |                   |                   |                  | dr at the C2-position <sup>a</sup> | Yield (%) <sup>b</sup> |
|------------|-----------------------------|-------------------|-------------------|------------------|-------------------------------|-------------------|-------------------|------------------|------------------------------------|------------------------|
|            | $\delta$ H2 (ppm)           | $\delta$ H4 (ppm) | $\delta$ H5 (ppm) | $J_{H4-H5}$ (Hz) | $\delta$ H2 (ppm)             | $\delta$ H4 (ppm) | $\delta$ H5 (ppm) | $J_{H4-H5}$ (Hz) |                                    |                        |
| <b>10a</b> | 4.15                        | 4.98              | 4.09              | 9.0              | 4.94                          | 5.23              | 4.22              | 7.4              | 5.6:1                              | 81                     |
| <b>10b</b> | 4.20                        | 5.02              | 4.13              | 9.0              | 4.99                          | 5.26              | 4.26              | 7.3              | 3.7:1                              | 97                     |
| <b>10c</b> | 4.21                        | 5.04              | 4.17              | 9.0              | 4.99                          | 5.26              | 4.27              | 7.4              | 5.3:1                              | 90                     |
| <b>10d</b> | 4.19                        | 5.02              | 4.13              | 9.0              | 4.99                          | 5.26              | 4.25              | 7.3              | 3.9:1                              | 97                     |
| <b>10e</b> | 4.13                        | 4.97              | 4.07              | 9.0              | 4.92                          | 5.20              | 4.21              | 7.3              | 4.8:1                              | 89                     |
| <b>10f</b> | 4.21                        | 5.03              | 4.16              | 9.1              | 4.99                          | 5.26              | 4.29              | 7.3              | 5.6:1                              | 74                     |

**Table S5:** Key chemical shifts ( $\delta$ ), coupling constants ( $J$ ), diastereomeric ratio (dr) and yields of oxazolidines **10a-f**; CDCl<sub>3</sub> solvent, 400 MHz; <sup>a</sup> Determined from <sup>1</sup>H-NMR studies of the crude material; <sup>b</sup> Yields include both diastereomers.

| Compound   | R <sup>1</sup> | $\delta$ (ppm) |      |      | $J_{H4-H5}$ (Hz) | dr at the C2-position <sup>a</sup> | Yield (%)           |
|------------|----------------|----------------|------|------|------------------|------------------------------------|---------------------|
|            |                | H2             | H4   | H5   |                  |                                    |                     |
| <b>11a</b> | <i>p</i> -H    | 5.37           | 5.21 | 4.80 | 6.9              | 11.5:1                             | 80                  |
| <b>11b</b> | <i>p</i> -Me   | 5.36           | 5.18 | 4.77 | 6.9              | 9:1                                | Quant. <sup>b</sup> |
| <b>11c</b> | <i>p</i> -Bu   | 5.37           | 5.19 | 4.77 | 6.9              | 9:1                                | 60                  |
| <b>11d</b> | <i>p</i> -OMe  | 5.36           | 5.17 | 4.75 | 6.9              | 9:1                                | Quant. <sup>b</sup> |
| <b>11e</b> | <i>p</i> -F    | 5.36           | 5.18 | 4.79 | 6.8              | 9:1                                | 37                  |
| <b>11f</b> | <i>p</i> -Cl   | 5.37           | 5.17 | 4.81 | 6.8              | 9:1                                | 76                  |

**Table S6:** Key chemical shifts ( $\delta$ ) and coupling constants ( $J$ ) of the major malonamide diastereomer including the diastereomeric ratio (dr) and yields of malonamides **11a-f**; CDCl<sub>3</sub> solvent, 400 MHz; <sup>a</sup> Determined from <sup>1</sup>H-NMR studies of the crude material; <sup>b</sup> Crude yield.

| Compound   | R <sup>1</sup> | $\delta$ (ppm) |      |      |      | $J_{H7-H7}$ (Hz) | Yield (%) |
|------------|----------------|----------------|------|------|------|------------------|-----------|
|            |                | H2             | H4   | H7   | H7   |                  |           |
| <b>14a</b> | <i>p</i> -H    | 5.16           | 4.96 | 3.79 | 3.22 | 20.5             | 94        |
| <b>14b</b> | <i>p</i> -Me   | 5.15           | 4.92 | 3.78 | 3.22 | 20.6             | 79        |
| <b>14c</b> | <i>p</i> -Bu   | 5.16           | 4.94 | 3.79 | 3.23 | 20.5             | 78        |
| <b>14d</b> | <i>p</i> -OMe  | 5.15           | 4.91 | 3.80 | 3.22 | 20.5             | 80        |
| <b>14e</b> | <i>p</i> -F    | 5.16           | 4.92 | 3.80 | 3.22 | 20.6             | 82        |
| <b>14f</b> | <i>p</i> -Cl   | 5.16           | 4.90 | 3.80 | 3.23 | 20.7             | 86        |

**Table S7:** Key chemical shifts ( $\delta$ ), coupling constants ( $J$ ) and yields of tetramates **14a-f**; CDCl<sub>3</sub> solvent, 400 MHz.

| Compound   | R <sup>1</sup> | $\delta$ H2<br>(ppm) | $\delta$ H4<br>(ppm) | Yield<br>(%) |
|------------|----------------|----------------------|----------------------|--------------|
| <b>22a</b> | <i>p</i> -H    | 4.91                 | 4.81                 | 26           |
| <b>22b</b> | <i>p</i> -Me   | 4.90                 | 4.77                 | 17           |
| <b>22c</b> | <i>p</i> -Bu   | 4.89                 | 4.78                 | 10           |
| <b>22d</b> | <i>p</i> -OMe  | 4.89                 | 4.75                 | 19           |
| <b>22e</b> | <i>p</i> -F    | 4.91                 | 4.76                 | 27           |
| <b>22f</b> | <i>p</i> -Cl   | 4.91                 | 4.75                 | 11           |

**Table S8:** Key chemical shifts ( $\delta$ ) and yields of tetramates **22a-f**; CDCl<sub>3</sub> solvent, 400 MHz.

| Compound   | R <sup>1</sup> | $\delta$ (ppm) |       |       |       | Tautomeric<br>ratio | Yield<br>(%) |
|------------|----------------|----------------|-------|-------|-------|---------------------|--------------|
|            |                | C6             | C8    | C9    | C10   |                     |              |
| <b>23a</b> | <i>p</i> -H    | 188.0          | 176.9 | 166.9 | 165.5 | 54:46 <sup>a</sup>  | 42           |
|            |                | 189.4          | 182.6 | 167.3 | 166.2 |                     |              |
| <b>23b</b> | <i>p</i> -Me   | 187.9          | 176.8 | 166.8 | 165.3 | 58:42 <sup>a</sup>  | 49           |
|            |                | 189.1          | 182.6 | 167.2 | 166.0 |                     |              |
| <b>23c</b> | <i>p</i> -Bu   | 187.9          | 176.9 | 166.8 | 165.4 | 58:42 <sup>a</sup>  | 35           |
|            |                | 189.2          | 182.6 | 167.2 | 166.1 |                     |              |
| <b>23d</b> | <i>p</i> -OMe  | 188.0          | 176.9 | 166.8 | 165.4 | 55:45 <sup>a</sup>  | 26           |
|            |                | 189.3          | 182.7 | 167.2 | 166.1 |                     |              |
| <b>23e</b> | <i>p</i> -F    | 187.9          | 176.9 | 166.9 | 165.5 | 53:47 <sup>b</sup>  | 54           |
|            |                | 189.7          | 182.5 | 167.2 | 166.1 |                     |              |
| <b>23f</b> | <i>p</i> -Cl   | 187.9          | 176.9 | 166.9 | 165.5 | 55:45 <sup>a</sup>  | 60           |
|            |                | 189.8          | 182.5 | 167.2 | 166.1 |                     |              |

**Table S9:** Key <sup>13</sup>C-NMR chemical shift values ( $\delta$ ) of the tautomeric forms of C7-carboxamides **23a-f**; CDCl<sub>3</sub> solvent, 400 MHz; <sup>a</sup> Determined from the H2 signal from the <sup>1</sup>H-NMR spectrum; <sup>b</sup> Determined from <sup>19</sup>F-NMR spectrum.

| Compound         | R <sup>1</sup>                                                                      | $\delta$ (ppm) |      |       |       |       |       | Yield (%) |
|------------------|-------------------------------------------------------------------------------------|----------------|------|-------|-------|-------|-------|-----------|
|                  |                                                                                     | H2             | H4   | C6    | C8    | C9    | C10   |           |
| 25a              | 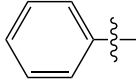   | 5.10           | 4.89 | 186.8 | 182.4 | 183.7 | 165.5 | 32        |
| 25b              |    | 5.08           | 4.87 | 186.9 | 182.6 | 183.6 | 165.6 | 26        |
| 25c              |    | 5.05           | 4.84 | 187.0 | 182.8 | 183.0 | 165.7 | 18        |
| 25d              |    | 5.09           | 4.88 | 186.9 | 182.2 | 182.2 | 165.3 | 39        |
| 25e              |    | 5.08           | 4.88 | 187.0 | 182.5 | 182.5 | 165.3 | 35        |
| 25f <sup>a</sup> |    | 5.06           | 4.85 | 186.9 | 182.2 | 182.7 | 165.4 | 37        |
| 25g              |   | 5.07           | 4.88 | n.d   | n.d   | n.d   | 165.1 | 30        |
| 25h              |  | 5.07           | 4.87 | 186.8 | 182.0 | 182.0 | 165.2 | 41        |
| 25i              |  | 5.06           | 4.84 | 186.7 | 182.5 | 183.5 | 165.5 | 44        |
| 25j              |  | 5.08           | 4.88 | n.d   | n.d   | n.d   | 165.1 | 12        |
| 25k              |  | 5.06           | 4.84 | 186.6 | 182.7 | 183.5 | 165.5 | 17        |
| 25l              |  | 4.97           | 4.78 | 186.6 | 182.8 | 182.8 | 165.5 | 13        |
| 25m              |  | 5.02           | 4.84 | 187.4 | 179.3 | 181.9 | 164.8 | 37        |
| 25n              |  | 5.02           | 4.83 | 187.8 | 180.8 | 196.1 | 165.4 | 57        |
| 25o <sup>b</sup> |  | 4.99           | 4.79 | 188.3 | 180.2 | 191.7 | 165.3 | 44        |

|                        |                                                                                   |      |      |       |       |       |       |    |
|------------------------|-----------------------------------------------------------------------------------|------|------|-------|-------|-------|-------|----|
| <b>25p<sup>b</sup></b> | 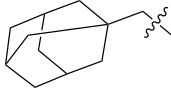 | 5.00 | 4.79 | 188.6 | 180.3 | 190.5 | 165.4 | 57 |
| <b>25q<sup>b</sup></b> |  | 4.98 | 4.79 | 188.3 | 179.9 | 188.5 | 165.3 | 51 |
| <b>25r</b>             |  | 4.99 | 4.79 | 188.1 | 180.3 | 192.6 | 165.4 | 47 |
| <b>25s</b>             |  | 4.99 | 4.80 | 188.1 | 180.2 | 192.1 | 165.3 | 41 |

**Table S10:** Key chemical shifts ( $\delta$ ) and yields of C7-acyltetramates **25a-s**; CDCl<sub>3</sub> solution, 400 MHz; <sup>a</sup> CDCl<sub>3</sub> solution, 500 MHz; <sup>b</sup> refers to the major **CD** tautomer; where n.d = not detected.

| Compound              | R <sup>1</sup>                                                                      | $\delta$ (ppm) |           |           | $J_{\text{H2-H3}}$<br>(Hz) | $J_{\text{H2-NH}}$<br>(Hz) | Yield (%) |
|-----------------------|-------------------------------------------------------------------------------------|----------------|-----------|-----------|----------------------------|----------------------------|-----------|
|                       |                                                                                     | H2             | H3        | NH        |                            |                            |           |
| <b>9a</b>             | 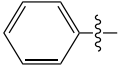   | 4.61           | 5.12      | 5.25      | 3.9                        | 7.6                        | 79        |
| <b>9b</b>             |    | 4.65           | 5.16      | 5.30      | 3.7                        | 7.3                        | 64        |
| <b>9c</b>             |    | 4.67           | 5.25      | 5.37      | 3.3                        | 6.9                        | 69        |
| <b>9d</b>             |    | 4.69           | 5.25      | 5.36      | 3.7                        | 7.2                        | 62        |
| <b>9e</b>             |    | 4.69           | 5.31      | 5.39      | 3.3                        | 6.8                        | 73        |
| <b>9f</b>             |    | 4.69           | 5.19      | 5.31      | 3.8                        | 7.5                        | 69        |
| <b>9g</b>             |    | 4.66           | 5.19      | 5.37      | 3.6                        | 7.2                        | 72        |
| <b>9h</b>             |   | 4.64           | 5.17      | 5.37      | 3.6                        | 7.2                        | 70        |
| <b>9i</b>             |  | 4.72           | 5.47      | 5.38      | n.d <sup>a</sup>           | n.d <sup>a</sup>           | 68        |
| <b>9j</b>             |  | 4.73           | 5.31-5.48 | 5.31-5.48 | n.d <sup>a</sup>           | n.d <sup>a</sup>           | 88        |
| <b>9k</b>             |  | 4.68           | 5.22      | 5.47      | 3.8                        | 7.4                        | 79        |
| <b>9l</b>             |  | 4.75           | 5.48      | 5.39      | n.d <sup>a</sup>           | n.d <sup>a</sup>           | 51        |
| <b>9m<sup>b</sup></b> |  | 4.69           | 6.03      | 5.42      | 2.6                        | 9.1                        | 15        |

**Table S11:** Yields and key chemical shifts of Boc-protected-*allo*-phenylserines **9a-m**; CDCl<sub>3</sub> solvent, 400 MHz; <sup>a</sup> n.d = not determined due to a broad multiplet peak; <sup>b</sup> Data refers to the major rotamer.

| Compound   | R <sup>1</sup>                                           | $\delta$ (ppm) |      |             |      |      | Yield (%) |
|------------|----------------------------------------------------------|----------------|------|-------------|------|------|-----------|
|            |                                                          | H2             | H3   | $J_{H2-H3}$ | C2   | C3   |           |
| <b>28a</b> | Ph                                                       | 4.48           | 5.40 | 4.2         | 58.5 | 71.0 | Quant.    |
| <b>28b</b> | <i>p</i> -Br-C <sub>6</sub> H <sub>4</sub>               | 4.48           | 5.38 | 3.9         | 58.3 | 70.4 | Quant.    |
| <b>28c</b> | <i>p</i> -CN-C <sub>6</sub> H <sub>4</sub>               | 4.56           | 5.48 | 3.6         | 58.1 | 70.5 | Quant.    |
| <b>28d</b> | <i>p</i> -CF <sub>3</sub> -C <sub>6</sub> H <sub>4</sub> | 4.57           | 5.51 | 3.7         | 58.3 | 70.5 | Quant.    |
| <b>28e</b> | <i>p</i> -NO <sub>2</sub> -C <sub>6</sub> H <sub>4</sub> | 4.60           | 5.53 | 3.5         | 58.1 | 70.4 | Quant.    |
| <b>28f</b> | <i>m</i> -MeO-C <sub>6</sub> H <sub>4</sub>              | 4.49           | 5.40 | 4.1         | 58.4 | 70.7 | Quant.    |
| <b>28g</b> | <i>m</i> -Cl-C <sub>6</sub> H <sub>4</sub>               | 4.49           | 5.39 | 3.9         | 58.3 | 70.3 | Quant.    |
| <b>28h</b> | <i>m</i> -Br-C <sub>6</sub> H <sub>4</sub>               | 4.49           | 5.40 | 3.8         | 58.3 | 70.3 | Quant.    |
| <b>28i</b> | <i>o</i> -F-C <sub>6</sub> H <sub>4</sub>                | 4.54           | 5.59 | 3.7         | 57.0 | 66.3 | Quant.    |
| <b>28j</b> | <i>o</i> -Br-C <sub>6</sub> H <sub>4</sub>               | 4.62           | 5.51 | 3.2         | 55.9 | 70.7 | Quant.    |
| <b>28k</b> | <i>m</i> -Pyridyl                                        | 4.69           | 5.64 | 2.7         | 57.5 | 68.2 | Quant.    |

**Table S12:** Key chemical shifts, coupling constants and yields of amino esters **28a-k**; D<sub>2</sub>O solvent, 400 MHz.

| Compound   | R <sup>1</sup>                                           | 2,5- <i>cis</i> oxazolidine $\delta$ (ppm) |      |      |                  | 2,5- <i>trans</i> oxazolidine $\delta$ (ppm) |      |      |                  | dr at the C2-position <sup>a</sup> | Yield (%) <sup>b</sup> |
|------------|----------------------------------------------------------|--------------------------------------------|------|------|------------------|----------------------------------------------|------|------|------------------|------------------------------------|------------------------|
|            |                                                          | H2                                         | H4   | H5   | $J_{H4-H5}$ (Hz) | H2                                           | H4   | H5   | $J_{H4-H5}$ (Hz) |                                    |                        |
| <b>10a</b> | Ph                                                       | 4.15                                       | 4.98 | 4.09 | 9.0              | 4.94                                         | 5.23 | 4.22 | 7.4              | 5.6:1                              | 57                     |
| <b>10g</b> | <i>p</i> -Br-C <sub>6</sub> H <sub>4</sub>               | 4.20                                       | 5.00 | 4.15 | 9.0              | 4.98                                         | 5.24 | 4.28 | 7.3              | 5.7:1                              | 82                     |
| <b>10h</b> | <i>p</i> -CN-C <sub>6</sub> H <sub>4</sub>               | 4.23                                       | 5.07 | 4.21 | 9.1              | 5.01                                         | 5.29 | 4.34 | 7.4              | 4.6:1                              | 74                     |
| <b>10i</b> | <i>p</i> -CF <sub>3</sub> -C <sub>6</sub> H <sub>4</sub> | 4.23                                       | 5.10 | 4.20 | 9.0              | 5.02                                         | 5.32 | 4.33 | 7.3              | 5.3:1                              | 85                     |
| <b>10j</b> | <i>p</i> -NO <sub>2</sub> -C <sub>6</sub> H <sub>4</sub> | 4.25                                       | 5.13 | 4.24 | 9.1              | 5.03                                         | 5.35 | 4.37 | 7.4              | 4.6:1                              | 61                     |
| <b>10k</b> | <i>m</i> -MeO-C <sub>6</sub> H <sub>4</sub>              | 4.20                                       | 5.02 | 4.15 | 9.0              | 4.99                                         | 5.26 | 4.27 | 7.3              | 5.7:1                              | 60                     |
| <b>10l</b> | <i>m</i> -Cl-C <sub>6</sub> H <sub>4</sub>               | 4.13                                       | 4.94 | 4.09 | 9.1              | 4.94                                         | 5.18 | 4.22 | 7.4              | 4.6:1                              | 78                     |
| <b>10m</b> | <i>m</i> -Br-C <sub>6</sub> H <sub>4</sub>               | 4.13                                       | 4.93 | 4.08 | 8.9              | 4.92                                         | 5.17 | 4.22 | 7.4              | 3.8:1                              | 80                     |
| <b>10n</b> | <i>o</i> -F-C <sub>6</sub> H <sub>4</sub>                | 4.22                                       | 5.39 | 4.22 | 8.9              | 4.99                                         | 5.51 | 4.39 | 7.2              | 4.9:1                              | 78                     |
| <b>10o</b> | <i>o</i> -Br-C <sub>6</sub> H <sub>4</sub>               | 4.22                                       | 5.43 | 4.28 | 8.7              | 5.04                                         | 5.46 | 4.56 | 7.0              | 5.7:1                              | 77                     |
| <b>10p</b> | <i>m</i> -Pyridyl                                        | 4.22                                       | 5.07 | 4.19 | 9.0              | 4.99                                         | 5.30 | 4.33 | 7.4              | 4.9:1                              | 57                     |

**Table S13:** Key chemical shifts ( $\delta$ ), coupling constants ( $J$ ), diastereomeric ratio (dr) and yields of oxazolidines **10a,g-p**; CDCl<sub>3</sub> solvent, 400 MHz; <sup>a</sup> Determined from <sup>1</sup>H-NMR studies of the crude material where the major diastereomer was the 2,5-*cis* isomer; <sup>b</sup> Yields include both diastereomers.

| Compound   | R <sup>1</sup>                                           | $\delta$ (ppm) |      |      | $J_{H4-H5}$<br>(Hz) | Yield<br>(%) |
|------------|----------------------------------------------------------|----------------|------|------|---------------------|--------------|
|            |                                                          | H2             | H4   | H5   |                     |              |
| <b>11a</b> | Ph                                                       | 5.37           | 5.21 | 4.80 | 6.9                 | 78           |
| <b>11g</b> | <i>p</i> -Br-C <sub>6</sub> H <sub>4</sub>               | 5.38           | 5.16 | 4.82 | 6.7                 | 69           |
| <b>11h</b> | <i>p</i> -CN-C <sub>6</sub> H <sub>4</sub>               | 5.40           | 5.22 | 4.93 | 6.5                 | 68           |
| <b>11i</b> | <i>p</i> -CF <sub>3</sub> -C <sub>6</sub> H <sub>4</sub> | 5.40           | 5.25 | 4.90 | 6.6                 | 59           |
| <b>11j</b> | <i>p</i> -NO <sub>2</sub> -C <sub>6</sub> H <sub>4</sub> | 5.42           | 5.27 | 4.98 | 6.3                 | 75           |
| <b>11k</b> | <i>m</i> -MeO-C <sub>6</sub> H <sub>4</sub>              | 5.38           | 5.18 | 4.80 | 6.9                 | 68           |
| <b>11l</b> | <i>m</i> -Cl-C <sub>6</sub> H <sub>4</sub>               | 5.38           | 5.17 | 4.84 | 6.7                 | 72           |
| <b>11m</b> | <i>m</i> -Br-C <sub>6</sub> H <sub>4</sub>               | 5.38           | 5.17 | 4.84 | 6.7                 | 66           |
| <b>11n</b> | <i>o</i> -F-C <sub>6</sub> H <sub>4</sub>                | 5.39           | 5.33 | 4.93 | 6.3                 | 61           |
| <b>11o</b> | <i>o</i> -Br-C <sub>6</sub> H <sub>4</sub>               | 5.40           | 5.33 | 5.15 | 6.5                 | 54           |
| <b>11p</b> | <i>m</i> -Pyridyl                                        | 5.39           | 5.22 | 4.89 | 6.6                 | 68           |

**Table S14:** Key chemical shifts ( $\delta$ ) and coupling constants ( $J$ ) of the major malonamide diastereomer including the yields of malonamides **11a,g-p**; CDCl<sub>3</sub> solvent, 400 MHz.

| Compound   | R <sup>1</sup>                                           | $\delta$ (ppm) |      |      |      | $J_{H7-H7}$<br>(Hz) | Yield<br>(%)      |
|------------|----------------------------------------------------------|----------------|------|------|------|---------------------|-------------------|
|            |                                                          | H2             | H4   | H7   | H7   |                     |                   |
| <b>14a</b> | Ph                                                       | 5.16           | 4.96 | 3.79 | 3.22 | 20.5                | 81                |
| <b>14g</b> | <i>p</i> -Br-C <sub>6</sub> H <sub>4</sub>               | 5.16           | 4.88 | 3.81 | 3.23 | 20.7                | 85                |
| <b>14h</b> | <i>p</i> -CN-C <sub>6</sub> H <sub>4</sub>               | 5.19           | 4.95 | 3.84 | 3.26 | 20.8                | 92                |
| <b>14i</b> | <i>p</i> -CF <sub>3</sub> -C <sub>6</sub> H <sub>4</sub> | 5.20           | 4.97 | 3.84 | 3.26 | 20.7                | 84                |
| <b>14j</b> | <i>p</i> -NO <sub>2</sub> -C <sub>6</sub> H <sub>4</sub> | 5.21           | 4.99 | 3.86 | 3.28 | 20.9                | 86                |
| <b>14k</b> | <i>m</i> -MeO-C <sub>6</sub> H <sub>4</sub>              | 5.16           | 4.93 | 3.77 | 3.22 | 20.6                | 79                |
| <b>14l</b> | <i>m</i> -Cl-C <sub>6</sub> H <sub>4</sub>               | 5.16           | 4.90 | 3.82 | 3.23 | 20.7                | 86                |
| <b>14m</b> | <i>m</i> -Br-C <sub>6</sub> H <sub>4</sub>               | 5.16           | 4.89 | 3.82 | 3.22 | 20.6                | 76                |
| <b>14n</b> | <i>o</i> -F-C <sub>6</sub> H <sub>4</sub>                | –              | –    | –    | –    | –                   | n.d. <sup>a</sup> |
| <b>14o</b> | <i>o</i> -Br-C <sub>6</sub> H <sub>4</sub>               | –              | –    | –    | –    | –                   | 0                 |
| <b>14p</b> | <i>m</i> -Pyridyl                                        | –              | –    | –    | –    | –                   | 0                 |

**Table S15:** Key chemical shifts ( $\delta$ ), coupling constants ( $J$ ) and yields of tetramates **14g-p**; CDCl<sub>3</sub> solvent, 400 MHz; <sup>a</sup> n.d = not determined as the compound was discarded.



| Compound | Structure                                                                           | MW (g/mol) | cLogP | PSA (Å <sup>2</sup> ) | MSA (Å <sup>2</sup> ) | rel. PSA (%) | H-donor | H-acceptor | Ro5 | MIC (µg/ml) |
|----------|-------------------------------------------------------------------------------------|------------|-------|-----------------------|-----------------------|--------------|---------|------------|-----|-------------|
| 14a      | 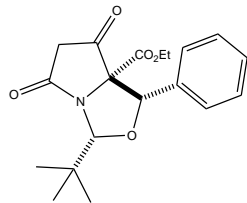   | 345.40     | 3.43  | 72.91                 | 527.95                | 13.81        | 0       | 4          | 4/4 | 15.6        |
| 14b      |    | 359.42     | 3.94  | 72.91                 | 560.84                | 13.00        | 0       | 4          | 4/4 | 7.8         |
| 14c      |   | 401.50     | 5.27  | 72.91                 | 652.12                | 11.18        | 0       | 4          | 3/4 | 15.6        |
| 14d      |  | 375.42     | 3.27  | 82.14                 | 575.79                | 14.27        | 0       | 5          | 4/4 | 15.6        |
| 14e      |  | 363.39     | 3.57  | 72.91                 | 534.55                | 13.64        | 0       | 4          | 4/4 | 15.6        |
| 14f      |  | 379.84     | 4.03  | 72.91                 | 544.60                | 13.39        | 0       | 4          | 4/4 | 15.6        |
| 14g      |  | 424.29     | 4.20  | 72.91                 | 548.56                | 13.29        | 0       | 4          | 4/4 | 31          |

|            |                                                                                     |        |      |        |        |       |   |   |     |      |
|------------|-------------------------------------------------------------------------------------|--------|------|--------|--------|-------|---|---|-----|------|
| <b>14h</b> | 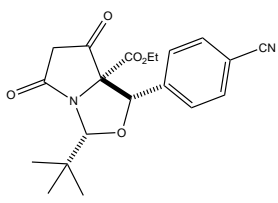   | 370.41 | 3.28 | 96.70  | 545.24 | 17.74 | 0 | 5 | 4/4 | 250  |
| <b>14i</b> |    | 413.39 | 4.30 | 72.91  | 577.83 | 12.62 | 0 | 4 | 4/4 | 250  |
| <b>14j</b> |    | 390.39 | 3.37 | 116.05 | 566.07 | 20.50 | 0 | 6 | 4/4 | 125  |
| <b>14k</b> |   | 375.42 | 3.27 | 82.14  | 576.69 | 14.24 | 0 | 5 | 4/4 | 31   |
| <b>23a</b> |  | 522.64 | 4.00 | 105.17 | 777.62 | 13.52 | 2 | 5 | 3/4 | 0.25 |
| <b>23b</b> |  | 536.67 | 4.52 | 105.17 | 804.02 | 13.08 | 2 | 5 | 3/4 | 0.25 |
| <b>23c</b> |  | 578.75 | 5.85 | 105.17 | 898.42 | 11.71 | 2 | 5 | 2/4 | 3.9  |
| <b>23d</b> |  | 552.67 | 3.85 | 114.40 | 823.73 | 13.89 | 2 | 6 | 3/4 | 0.25 |

|            |                                                                                     |        |      |        |        |       |   |   |     |      |
|------------|-------------------------------------------------------------------------------------|--------|------|--------|--------|-------|---|---|-----|------|
| <b>23e</b> | 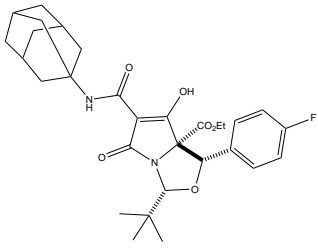   | 540.63 | 4.15 | 105.17 | 784.23 | 13.41 | 2 | 5 | 3/4 | 0.25 |
| <b>23f</b> |    | 557.08 | 4.61 | 105.17 | 794.07 | 13.24 | 2 | 5 | 3/4 | 0.25 |
| <b>25b</b> |   | 463.53 | 5.24 | 93.14  | 675.92 | 13.78 | 1 | 5 | 3/4 | 125  |
| <b>25c</b> |  | 479.53 | 4.57 | 102.37 | 693.57 | 14.76 | 1 | 6 | 4/4 | 125  |
| <b>25g</b> |  | 494.50 | 4.67 | 136.28 | 682.43 | 19.97 | 1 | 7 | 4/4 | 125  |
| <b>25h</b> |  | 517.50 | 5.61 | 93.14  | 693.63 | 13.43 | 1 | 5 | 2/4 | 125  |

|     |                                                                                     |        |      |        |        |       |   |   |     |     |
|-----|-------------------------------------------------------------------------------------|--------|------|--------|--------|-------|---|---|-----|-----|
| 25j | 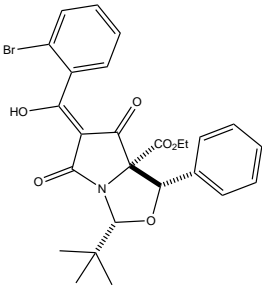   | 528.40 | 5.50 | 93.14  | 663.41 | 14.04 | 1 | 5 | 2/4 | 250 |
| 25k |    | 509.56 | 4.41 | 111.60 | 741.82 | 15.04 | 1 | 7 | 3/4 | 125 |
| 25q |   | 387.43 | 3.36 | 93.14  | 569.32 | 16.36 | 1 | 5 | 4/4 | 250 |
| 25r |  | 443.54 | 5.22 | 93.14  | 691.73 | 13.47 | 1 | 5 | 3/4 | 63  |
| 25s |  | 441.52 | 4.91 | 93.14  | 660.54 | 14.10 | 1 | 5 | 4/4 | 125 |

**Table S16:** Physicochemical properties of bicyclic tetramates; where cLogP, MSA, PSA, H-donors and H-acceptors were calculated using Marvin (19.9.0), 2019, ChemAxon. MIC values indicates potency against *S. aureus*;  $M_w$  = molecular weight; cLogP = calculated partition coefficient between octanol and water; PSA = polar surface area; MSA = molecular surface area; rel. PSA = relative polar surface area ((PSA/MSA)x100); H-donor = hydrogen-bond donor count; H-acceptor = hydrogen-bond acceptor count; Ro5 = rule of 5; MIC = minimum inhibitory concentration against *S. aureus*; n.a. = not active.

## Experimental

### General Methods

Overnight reaction refers to reactions occurring between 15-24 h. All reagents were obtained from commercial sources and was used without further purification. Anhydrous solvents were dried by pre-storing them over activated 3 Å molecular sieves before being passed through an activated alumina column on a solvent tower under N<sub>2</sub> pressure. Solvents were evaporated at 40°C under reduced pressure on a Büchi R-114 rotatory evaporator attached to a Vacuubrand CVC2 pump and a pressure control system, with the exception of water, which was evaporated between 70-80°C. Analytical thin-layer chromatography (TLC) was carried out on Merck aluminium foil backed sheets precoated with 0.2 mm Kiieselgel 60 F<sub>254</sub>. The eluent used is specified in each case. The spots were visualised by UV irradiation ( $\lambda=254$  nm) and by staining with KMnO<sub>4</sub> solution followed by heating. Retention factors (R<sub>f</sub>) are quoted to the nearest 0.01. Flash column chromatography was performed on Kiieselgel 60 silica gel (230-400 mesh particle size). Melting points were measured using a Stuart Scientific SMP1 melting point instrument and are uncorrected. Infrared spectra were recorded on a Bruker Tensor 27 FT-IR spectrometer equipped with an attached Pike Miracle attenuated total reflectance (ATR) module. Absorption maxima ( $\nu_{\max}$ ) are reported in wavenumbers (cm<sup>-1</sup>) and only selected peaks are reported. <sup>1</sup>H-NMR spectra were recorded at 200 MHz, 400 MHz and 500 MHz, <sup>13</sup>C-NMR spectra were recorded at 101 MHz or 126 MHz and <sup>19</sup>F-NMR spectra were recorded at 377 MHz or 471 MHz using either a Bruker DPX200, AVIIIHD 400 and AVIIIHD 500. Chemical shifts ( $\delta_{\text{H}}$ ,  $\delta_{\text{F}}$  and  $\delta_{\text{C}}$ ) are reported in parts per million (ppm) upfield from TMS and are referenced to the residual solvent peak (in some cases, it was not possible to reference the chloroform peak in the <sup>1</sup>H-NMR spectra due to it being obscured by aromatic protons). Coupling constants (*J*) are quoted in Hertz (Hz). Data is reported in this format: chemical shift, integration, multiplicity (s = singlet, d = doublet, t = triplet, q = quartet, qn = quintet, dd = double doublet, dt = double triplet, dq = double quartet, m = multiplet, br = broad and app = apparent), coupling constant, and assignment. Two-dimensional COSY, HSQC, HMBC and NOESY experiments were recorded at 400 MHz and 500 MHz and nOe experiments were recorded at 500 MHz. Assignments of the spectra were made with <sup>1</sup>H, COSY, HSQC, HMBC, <sup>13</sup>C and DEPT-135 experiments and stereochemistry were assigned on the basis of nOe, NOESY or X-ray crystallography. Low resolution mass spectra (*m/z*) were recorded on an Agilent 6120 spectrometer or a Waters LCT Premier XE spectrometer using electrospray ionisation (ESI).

Selected peaks are reported in Daltons and their intensities given as percentages of the base peak. High resolution mass spectra (HRMS) were recorded on a Bruker microTOF (ESI) or on an Agilent 7200 Q-TOF (EI or CI). Crystals for X-ray crystallography were grown from slow vapour diffusion of petroleum ether 40:60 into a solution of compound dissolved in minimal EtOAc at room temperature. Low temperature<sup>2</sup> single-crystal X-ray diffraction data were collected using a Rigaku Oxford SuperNova diffractometer and at the Diamond Light Source Beamline, I19-1. Raw frame data were collected and reduced using CrysAlisPro and the structures were solved using 'Superflip'<sup>3</sup> before refinement with CRYSTALS<sup>4</sup>.

### **3. Assays / test methods**

#### **3.1 MIC**

The compounds were tested in a primary 96 well plates screening assay. The substances were diluted in a first step in DMSO (10 mg/mL) and then diluted in cell culture water to its final concentration of 250 µg/mL as stock solution. This solution was serial diluted (1:1) with medium to its final volume of 50 µL per well and overlaid with a microbial solution in the same volume (concentration of 10<sup>5</sup> CFU/mL). The plates were incubated for 24 h at 37°C for bacteria, 48 h at 27°C for fungi. The MIC represents the lowest compound concentration that totally inhibits microbial growth.

#### **3.2 Toxicity**

The compounds were tested in a primary 96 well plates screening assay. In a separate dilution plate the prediluted substances (10 mg/mL in 100% DMSO) were diluted in cell culture water to a stock concentration of 250 µg/mL and serial diluted (1:1) with medium. The cells were previously seeded into another 96 well plate and grown to a confluence of 90%. The medium was discarded and cells were overlaid with 100 µL from the dilution plate. Then the 96 well plates were incubated for 48 h under physiological conditions. The toxic concentration displays the lowest compound concentration where all cells are dead.

#### **General procedure for the synthesis of $\beta$ -oxoesters 5:**<sup>5</sup>

Ethyl potassium malonate (1.9 eq.) was dissolved in MeCN and cooled to 0°C in an ice/water bath. MgCl<sub>2</sub> (2.5 eq.) was added and the flask was put under N<sub>2</sub> atmosphere. Et<sub>3</sub>N (3 eq.) was then added dropwise and the solution was left to stir at rt for 2 h, where a white slurry formed. The flask was re-cooled to 0°C and the acyl

chloride (1 eq.) was added dropwise, followed by an additional amount of Et<sub>3</sub>N (0.5 eq.) and the solution was stirred overnight at rt. MeCN was then subsequently removed *in-vacuo*. The concentrate was cooled to 0°C and added to it was toluene and 12 % HCl solution (aq.) carefully, and the mixture was left to stir at rt for 20 min. The mixture was then transferred to a separatory funnel, where the organic layer was washed with 12 % HCl solution (aq.), water and brine, dried over Na<sub>2</sub>SO<sub>4</sub>, filtered and the solvent was removed *in-vacuo* to obtain the desired β-oxoesters **5** as a mixture of keto-enol tautomers and was used without further purification.

### Ethyl 3-oxo-3-(*p*-tolyl)propanoate **5b**

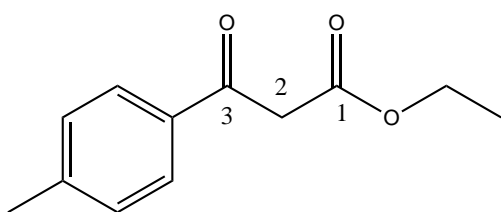

Yield (3.03 g, Quantitative); Red oil;  $\nu_{\max}/\text{cm}^{-1}$  2983 (C-H), 1738 (C=O), 1682 (C=O); Keto:enol tautomers=5.5:1;  $\delta_{\text{H}}$  (Major keto tautomer) (400 MHz, CDCl<sub>3</sub>) 1.26 (3H, t,  $J=7.1$  Hz, OCH<sub>2</sub>CH<sub>3</sub>), 2.42 (3H, s, CH<sub>3</sub>), 3.97 (2H, s, H<sub>2</sub>), 4.22 (2H, q,  $J=7.2$  Hz, OCH<sub>2</sub>CH<sub>3</sub>), 7.28 (2H, d,  $J=8.1$

Hz, Ar-H), 7.85 (2H, d,  $J=8.3$  Hz, Ar-H);  $\delta_{\text{C}}$  (Major keto tautomer) (101 MHz, CDCl<sub>3</sub>) 14.2 (OCH<sub>2</sub>CH<sub>3</sub>), 21.8 (CH<sub>3</sub>), 46.1 (C<sub>2</sub>), 61.6 (OCH<sub>2</sub>CH<sub>3</sub>), 128.8 (Ar-C), 129.6 (Ar-C), 133.7 (Ar-C), 144.8 (Ar-C), 167.8 (C<sub>1</sub>), 192.3 (C<sub>3</sub>);  $\delta_{\text{H}}$  (Minor enol tautomer) (400 MHz, CDCl<sub>3</sub>) 1.34 (3H, t,  $J=7.1$  Hz, OCH<sub>2</sub>CH<sub>3</sub>), 2.39 (3H, s, CH<sub>3</sub>), 4.27 (2H, m, OCH<sub>2</sub>CH<sub>3</sub>), 5.64 (1H, s, H<sub>2</sub>), 7.28-8.00 (4H, m, Ar-H), 12.59 (1H, s, OH);  $\delta_{\text{C}}$  (Minor enol tautomer) (101 MHz, CDCl<sub>3</sub>) 14.4 (OCH<sub>2</sub>CH<sub>3</sub>), 21.9 (CH<sub>3</sub>), 60.3 (OCH<sub>2</sub>CH<sub>3</sub>), 86.8 (C<sub>2</sub>), 129.3 (Ar-C), 130.3 (Ar-C), 133.7 (Ar-C), 144.6 (Ar-C), 171.5 (C=O), 173.4 (C=O); LRMS (ESI<sup>+</sup>)  $m/z$ : 229.0 ([M + Na]<sup>+</sup> 9%); HRMS (ESI<sup>+</sup>)  $m/z$ : [M + Na]<sup>+</sup> calcd. for C<sub>12</sub>H<sub>14</sub>O<sub>3</sub>Na, 229.0835, found 229.0837.

### Ethyl 3-(4-butylphenyl)-3-oxopropanoate **5c**

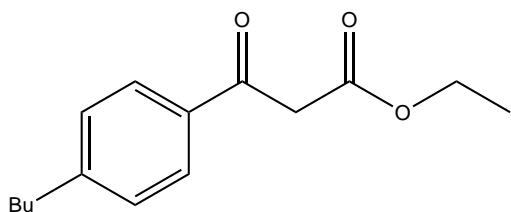

Yield (3.49 g, Quantitative); Orange/red oil that solidified on standing to a semi-solid;  $\nu_{\max}/\text{cm}^{-1}$  2958 (C-H), 2932 (C-H), 2861 (C-H), 1740 (C=O), 1685 (C=O); Keto:enol tautomers=2.8:1;  $\delta_{\text{H}}$  (Major keto tautomer) (400 MHz, CDCl<sub>3</sub>) 0.94 (3H, m, CH<sub>2</sub>CH<sub>3</sub>), 1.26 (3H, t,  $J=7.1$  Hz, OCH<sub>2</sub>CH<sub>3</sub>), 1.36 (2H, m, CH<sub>2</sub>CH<sub>3</sub>), 1.62 (2H, m, CH<sub>2</sub>CH<sub>2</sub>), 2.67 (2H, m, CH<sub>2</sub>CH<sub>2</sub>), 3.97 (2H, s, H<sub>2</sub>), 4.22 (2H, q,  $J=7.1$  Hz, OCH<sub>2</sub>CH<sub>3</sub>), 7.28 (2H, d,  $J=8.3$  Hz, Ar-H), 7.86 (2H, d,  $J=8.3$  Hz, Ar-H);  $\delta_{\text{C}}$  (Major keto tautomer) (101 MHz, CDCl<sub>3</sub>) 14.0 (CH<sub>2</sub>CH<sub>3</sub>), 14.2 (OCH<sub>2</sub>CH<sub>3</sub>), 22.4 (CH<sub>2</sub>CH<sub>3</sub>), 33.3 (CH<sub>2</sub>CH<sub>2</sub>), 35.8 (CH<sub>2</sub>CH<sub>2</sub>), 46.1 (C<sub>2</sub>), 61.6 (OCH<sub>2</sub>CH<sub>3</sub>), 128.8 (Ar-C),

128.9 (Ar-C), 133.9 (Ar-C), 149.7 (Ar-C), 167.8 (C1), 192.3 (C3);  $\delta_{\text{H}}$  (Minor enol tautomer) (400 MHz, CDCl<sub>3</sub>) 0.94 (3H, m, CH<sub>2</sub>CH<sub>3</sub>), 1.26 (3H, m, OCH<sub>2</sub>CH<sub>3</sub>), 1.36 (2H, m, CH<sub>2</sub>CH<sub>3</sub>), 1.62 (2H, m, CH<sub>2</sub>CH<sub>2</sub>), 2.67 (2H, m, CH<sub>2</sub>CH<sub>2</sub>), 4.28 (2H, m, OCH<sub>2</sub>CH<sub>3</sub>), 5.64 (1H, s, H2), 7.23-8.04 (4H, m, Ar-H), 12.58 (1H, s, OH);  $\delta_{\text{C}}$  (Minor enol tautomer) (101 MHz, CDCl<sub>3</sub>) 14.0 (CH<sub>2</sub>CH<sub>3</sub>), 14.2 (OCH<sub>2</sub>CH<sub>3</sub>), 22.4 (CH<sub>2</sub>CH<sub>3</sub>), 33.4 (CH<sub>2</sub>CH<sub>2</sub>), 35.9 (CH<sub>2</sub>CH<sub>2</sub>), 60.3 (OCH<sub>2</sub>CH<sub>3</sub>), 86.8 (C2), 128.7 (Ar-C), 130.4 (Ar-C), 133.9 (Ar-C), 149.6 (Ar-C), 171.6 (C=O), 173.4 (C=O); LRMS (ESI<sup>+</sup>) *m/z*: 271.2 ([M + Na]<sup>+</sup> 95%); HRMS (ESI<sup>+</sup>) *m/z*: [M + Na]<sup>+</sup> calcd. for C<sub>15</sub>H<sub>20</sub>O<sub>3</sub>Na, 271.1305, found 271.1304.

### Ethyl 3-(4-methoxyphenyl)-3-oxopropanoate 5d

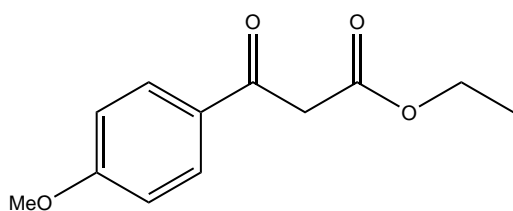

Yield (3.27 g, Quantitative); Orange oil;  $\nu_{\text{max}}$ /cm<sup>-1</sup> 2981 (C-H), 1736 (C=O), 1676 (C=O); Keto:enol tautomers=13:1;  $\delta_{\text{H}}$  (Major keto tautomer) (400 MHz, CDCl<sub>3</sub>) 1.24 (3H, t, *J*=7.1 Hz, OCH<sub>2</sub>CH<sub>3</sub>), 3.86 (3H, s, OCH<sub>3</sub>), 3.93 (2H, s, H2), 4.19 (2H, q, *J*=7.1 Hz, OCH<sub>2</sub>CH<sub>3</sub>), 6.93 (2H, d, *J*=8.9 Hz, Ar-H), 7.91 (2H, d, *J*=8.9 Hz, Ar-H);  $\delta_{\text{C}}$  (Major keto tautomer) (101 MHz, CDCl<sub>3</sub>) 14.2 (OCH<sub>2</sub>CH<sub>3</sub>), 45.9 (C2), 55.6 (OCH<sub>3</sub>), 61.5 (OCH<sub>2</sub>CH<sub>3</sub>), 114.0 (Ar-C), 129.2 (Ar-C), 131.0 (Ar-C), 164.1 (Ar-C), 167.9 (C1), 191.1 (C3);  $\delta_{\text{H}}$  (Minor enol tautomer) (400 MHz, CDCl<sub>3</sub>) 1.31 (3H, t, *J*=7.1 Hz, OCH<sub>2</sub>CH<sub>3</sub>), 3.86 (3H, s, OCH<sub>3</sub>), 4.25 (2H, m, OCH<sub>2</sub>CH<sub>3</sub>), 5.56 (1H, s, H2), 6.93-8.05 (4H, m, Ar-H), 12.62 (1H, s, OH);  $\delta_{\text{C}}$  (Minor enol tautomer) (101 MHz, CDCl<sub>3</sub>) 14.4 (OCH<sub>2</sub>CH<sub>3</sub>), 55.6 (OCH<sub>3</sub>), 60.3 (OCH<sub>2</sub>CH<sub>3</sub>), 85.8 (C2), 113.8 (Ar-C), 129.2 (Ar-C), 131.2 (Ar-C), 162.2 (Ar-C), 171.5 (C=O), 173.5 (C=O); LRMS (ESI<sup>+</sup>) *m/z*: 245.0 ([M + Na]<sup>+</sup> 72%); HRMS (ESI<sup>+</sup>) *m/z*: [M + Na]<sup>+</sup> calcd. for C<sub>12</sub>H<sub>14</sub>O<sub>4</sub>Na, 245.0784, found 245.0785.

### Ethyl 3-(4-fluorophenyl)-3-oxopropanoate 5e

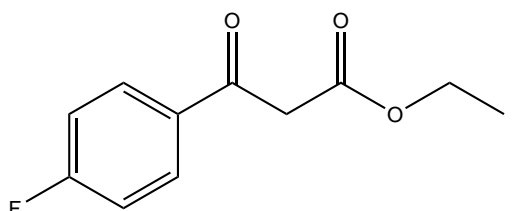

Yield (1.73 g, Quantitative); Orange oil;  $\nu_{\text{max}}$ /cm<sup>-1</sup> 2985 (C-H), 1736 (C=O), 1686 (C=O); Keto:enol tautomers=4.9:1;  $\delta_{\text{H}}$  (Major keto tautomer) (400 MHz, CDCl<sub>3</sub>) 1.24 (3H, t, *J*=7.1 Hz, OCH<sub>2</sub>CH<sub>3</sub>), 3.95 (2H, s, H2), 4.20 (2H, q, *J*=7.1 Hz, OCH<sub>2</sub>CH<sub>3</sub>), 7.14 (2H, app t, *J*=8.9 Hz, Ar-H), 7.97 (2H, dd, *J*=5.3 Hz, 8.9 Hz, Ar-H);  $\delta_{\text{C}}$  (Major keto tautomer) (101 MHz, CDCl<sub>3</sub>) 14.2 (OCH<sub>2</sub>CH<sub>3</sub>), 46.1 (C2), 61.7 (OCH<sub>2</sub>CH<sub>3</sub>), 116.1 (d, *J*=21.6 Hz, Ar-C), 131.4 (d, *J*=9.5 Hz, Ar-C), 132.6 (d, *J*=3.1 Hz, Ar-C), 166.4 (d, *J*=255.9 Hz,



Ar-C), 167.4 (C1), 191.0 (C3);  $\delta_F$  (Major keto tautomer) (377 MHz, CDCl<sub>3</sub>) -103.93;  $\delta_H$  (Minor enol tautomer) (400 MHz, CDCl<sub>3</sub>) 1.32 (3H, t,  $J=7.1$  Hz, OCH<sub>2</sub>CH<sub>3</sub>), 4.26 (2H, m, OCH<sub>2</sub>CH<sub>3</sub>), 5.59 (1H, s, H<sub>2</sub>), 7.06-8.10 (4H, m, Ar-H), 12.60 (1H, s, OH);  $\delta_C$  (Minor enol tautomer) (101 MHz, CDCl<sub>3</sub>) 14.4 (OCH<sub>2</sub>CH<sub>3</sub>), 60.5 (OCH<sub>2</sub>CH<sub>3</sub>), 87.3 (C2), 115.8 (d,  $J=21.6$  Hz, Ar-C), 128.3 (d,  $J=8.8$  Hz, Ar-C), 132.6 (Ar-C), 166.4 (Ar-C), 170.5 (C=O), 173.2 (C=O);  $\delta_F$  (Minor enol tautomer) (377 MHz, CDCl<sub>3</sub>) -108.52; LRMS (ESI<sup>+</sup>)  $m/z$ : 233.0 ([M + Na]<sup>+</sup> 65%); HRMS (ESI<sup>+</sup>)  $m/z$ : [M + Na]<sup>+</sup> calcd. for C<sub>11</sub>H<sub>11</sub>O<sub>3</sub>FNa, 233.0584, found 233.0585.

### Ethyl 3-(4-chlorophenyl)-3-oxopropanoate 5f

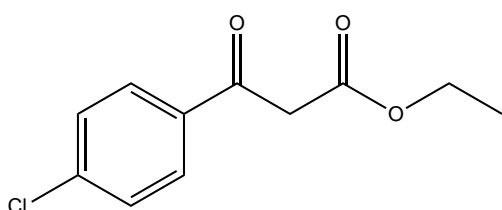

Yield (1.78 g, Quantitative); Yellow oil;  $\nu_{\max}/\text{cm}^{-1}$  2983 (C-H), 1737 (C=O), 1687 (C=O); Keto:enol tautomers=3.2:1;  $\delta_H$  (Major keto tautomer) (400 MHz, CDCl<sub>3</sub>) 1.18 (3H, t,  $J=7.1$  Hz, OCH<sub>2</sub>CH<sub>3</sub>), 3.88 (2H, s, H<sub>2</sub>), 4.13 (2H, q,  $J=7.1$  Hz, OCH<sub>2</sub>CH<sub>3</sub>), 7.38 (2H, d,  $J=8.6$  Hz, Ar-H), 7.81 (2H, d,  $J=8.7$  Hz, Ar-H);  $\delta_C$  (Major keto tautomer) (101 MHz, CDCl<sub>3</sub>) 14.2 (OCH<sub>2</sub>CH<sub>3</sub>), 46.1 (C2), 61.7 (OCH<sub>2</sub>CH<sub>3</sub>), 129.2 (Ar-C), 130.1 (Ar-C), 134.5 (Ar-C), 140.4 (Ar-C), 167.3 (C1), 191.4 (C3);  $\delta_H$  (Minor enol tautomer) (400 MHz, CDCl<sub>3</sub>) 1.26 (3H, t,  $J=7.1$  Hz, OCH<sub>2</sub>CH<sub>3</sub>), 4.19 (2H, m, OCH<sub>2</sub>CH<sub>3</sub>), 5.56 (1H, s, H<sub>2</sub>), 7.31-7.81 (4H, m, Ar-H), 12.50 (1H, s, OH);  $\delta_C$  (Minor enol tautomer) (101 MHz, CDCl<sub>3</sub>) 14.4 (OCH<sub>2</sub>CH<sub>3</sub>), 60.6 (OCH<sub>2</sub>CH<sub>3</sub>), 87.8 (C2), 127.5 (Ar-C), 128.9 (Ar-C), 134.5 (Ar-C), 140.4 (Ar-C), 170.2 (C=O), 173.2 (C=O); LRMS (ESI<sup>+</sup>)  $m/z$ : 249.0 ([M<sup>35</sup> + Na]<sup>+</sup> 82%), 251.0 ([M<sup>37</sup> + Na]<sup>+</sup> 26%); HRMS (ESI<sup>+</sup>)  $m/z$ : [M<sup>35</sup> + Na]<sup>+</sup> calcd. for C<sub>11</sub>H<sub>11</sub>O<sub>3</sub>ClNa, 249.0289, found 249.0291; [M<sup>37</sup> + Na]<sup>+</sup> calcd. for C<sub>11</sub>H<sub>11</sub>O<sub>3</sub>ClNa, 251.0259, found 251.0261.

### Ethyl 3-(4-bromophenyl)-3-oxopropanoate 5g

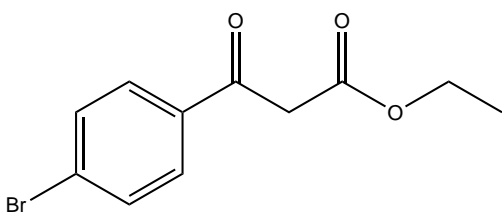

Yield (2.96 g, 91%); Orange oil;  $\nu_{\max}/\text{cm}^{-1}$  2983 (C-H), 1739 (C=O), 1687 (C=O); Keto:enol=2.7:1 tautomers;  $\delta_H$  (Major keto tautomer) (400 MHz, CDCl<sub>3</sub>) 1.25 (3H, t,  $J=7.1$  Hz, OCH<sub>2</sub>CH<sub>3</sub>), 3.95 (2H, s, H<sub>2</sub>), 4.20 (2H, q,  $J=7.1$  Hz, OCH<sub>2</sub>CH<sub>3</sub>), 7.62 (2H, d,  $J=8.6$  Hz, Ar-H), 7.80 (2H, d,  $J=8.6$  Hz, Ar-H);  $\delta_C$  (Major keto tautomer) (101 MHz, CDCl<sub>3</sub>) 14.2 (OCH<sub>2</sub>CH<sub>3</sub>), 46.1 (C2), 61.7 (OCH<sub>2</sub>CH<sub>3</sub>), 129.2 (Ar-C), 130.1 (Ar-C), 132.2 (Ar-C), 134.9 (Ar-C), 167.3 (C1), 191.6 (C3);  $\delta_H$  (Minor enol tautomer) (400 MHz, CDCl<sub>3</sub>) 1.33 (3H, t,

$J=7.1$  Hz,  $\text{OCH}_2\text{CH}_3$ ), 4.26 (2H, m,  $\text{OCH}_2\text{CH}_3$ ), 5.63 (1H, s, H2), 7.53-7.81 (4H, m, Ar-H), 12.55 (1H, s, OH);  $\delta_{\text{C}}$  (Minor enol tautomer) (101 MHz,  $\text{CDCl}_3$ ) 14.4 ( $\text{OCH}_2\text{CH}_3$ ), 60.6 ( $\text{OCH}_2\text{CH}_3$ ), 87.9 (C2), 127.7 (Ar-C), 129.2 (Ar-C), 131.9 (Ar-C), 134.9 (Ar-C), 170.3 (C=O), 173.2 (C=O); LRMS (ESI<sup>+</sup>)  $m/z$ : 293.0 ( $[\text{M}^{79} + \text{Na}]^+$  30%), 295.0 ( $[\text{M}^{81} + \text{Na}]^+$  27%); HRMS (ESI<sup>+</sup>)  $m/z$ :  $[\text{M}^{79} + \text{Na}]^+$  calcd. for  $\text{C}_{11}\text{H}_{11}\text{O}_3\text{BrNa}$ , 292.9784, found 292.9784;  $[\text{M}^{81} + \text{Na}]^+$  calcd. for  $\text{C}_{11}\text{H}_{11}\text{O}_3\text{BrNa}$ , 294.9763, found 294.9764.

### General procedure for the synthesis of oximes 6:<sup>6</sup>

**Method A:** To a stirred solution of ethyl benzoylacetate **5a** (1 eq.) dissolved in glacial acetic acid at 0 °C was added a solution of sodium nitrite (1.2-1.3 eq.) in water dropwise to ensure the temperature of the reaction medium did not rise above 10°C. After stirring for 30 minutes at rt, the product started to precipitate out and the solution was poured into water and stirred for a further 10 mins. The product was filtered off via vacuum filtration, washed with water and dried *in-vacuo* to give a white solid **6a** and was used without further purification.

**Method B:** To a stirred solution of substituted  $\beta$ -oxoesters **5b-g** (1 eq.) dissolved in glacial acetic acid at 0°C was added a solution of sodium nitrite (1.5 eq.) in water dropwise to ensure the temperature of the reaction medium did not rise above 10°C. The reaction was then left to stir at rt for 3 h or left to stir overnight at rt, and then glacial acetic acid was evaporated *in-vacuo*. Then added to the residue was DCM and  $\text{H}_2\text{O}$  and this mixture was left to stir for 10-20 min at rt (where a white/cream suspension might form). The layers were then separated using a separatory funnel, and the organic layer was washed successively with water,  $\text{NaHCO}_3$  (aq.) (very cautiously) and brine, dried over  $\text{Na}_2\text{SO}_4$ , filtered, and the solvent was removed *in-vacuo* to obtain the desired oxime **6b-g** and was used without further purification.

### Ethyl (*E*)-2-(hydroxyimino)-3-oxo-3-phenylpropanoate **6a**

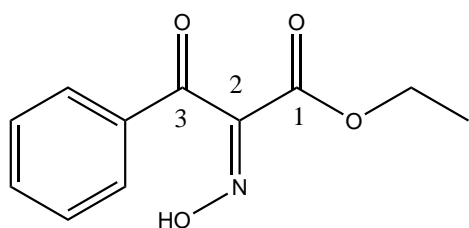

Method A: Yield (16.19 g, 71%); White solid; m.p. 144-147°C (lit.<sup>7</sup> 121-122°C); 21:1 mixture of *E/Z* isomers;  $\nu_{\text{max}}/\text{cm}^{-1}$  3325 (O-H), 2987 (C-H), 1721 (C=O), 1679 (C=O), 1596 (C=N);  $\delta_{\text{H}}$  (Major *E*-isomer) (400 MHz,  $\text{CDCl}_3$ ) 1.20 (3H, t,  $J=7.1$  Hz,  $\text{OCH}_2\text{CH}_3$ ), 4.26 (2H, q,  $J=7.1$  Hz,  $\text{OCH}_2\text{CH}_3$ ), 7.41-

8.00 (5H, m, Ar-H), 10.62 (1H, br s, OH);  $\delta_{\text{C}}$  (Major *E*-isomer) (101 MHz, CDCl<sub>3</sub>) 13.9 (OCH<sub>2</sub>CH<sub>3</sub>), 62.8 (OCH<sub>2</sub>CH<sub>3</sub>), 129.2 (Ar-C), 129.3 (Ar-C), 134.3 (Ar-C), 134.9 (Ar-C), 149.6 (C2), 161.0 (C1), 190.3 (C3); LRMS (ESI<sup>+</sup>) *m/z*: 244.0 ([M + Na]<sup>+</sup> 100%); LRMS (ESI<sup>-</sup>) *m/z*: 220.0 ([M - H]<sup>-</sup> 98%); HRMS (ESI<sup>+</sup>) *m/z*: [M + Na]<sup>+</sup> calcd. for C<sub>11</sub>H<sub>11</sub>NO<sub>4</sub>Na, 244.0580, found 244.0581.

### Ethyl 2-(hydroxyimino)-3-oxo-3-(*p*-tolyl)propanoate 6b

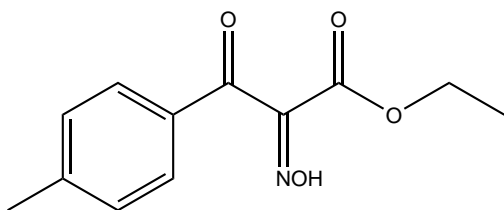

Method B: Yield (2.47 g, 73%); Light brown solid; m.p. 133-136°C;

17:1 mixture of *E/Z* isomers;  $\nu_{\text{max}}/\text{cm}^{-1}$  3312 (O-H), 2985 (C-H),

1721 (C=O), 1678 (C=O), 1605 (C=N);  $\delta_{\text{H}}$  (Major isomer) (400 MHz, CDCl<sub>3</sub>)

1.26 (3H, t, *J*=7.1 Hz, OCH<sub>2</sub>CH<sub>3</sub>), 2.43 (3H, s, CH<sub>3</sub>), 4.30 (2H, q, *J*=7.1

Hz, OCH<sub>2</sub>CH<sub>3</sub>), 7.31 (2H, d, *J*=8.3 Hz, Ar-H), 7.78 (2H, d, *J*=8.3 Hz, Ar-H);  $\delta_{\text{C}}$  (Major isomer) (101 MHz, CDCl<sub>3</sub>) 14.0 (OCH<sub>2</sub>CH<sub>3</sub>), 22.0 (CH<sub>3</sub>), 62.7 (OCH<sub>2</sub>CH<sub>3</sub>), 129.5 (Ar-C), 129.9 (Ar-C), 132.0 (Ar-C), 146.2 (Ar-C), 149.8 (C2), 160.8 (C1), 189.5 (C3); LRMS (ESI<sup>-</sup>) *m/z*: 234.1 ([M - H]<sup>-</sup> 98%); HRMS (ESI<sup>+</sup>) *m/z*: [M + Na]<sup>+</sup> calcd. for C<sub>12</sub>H<sub>13</sub>NO<sub>4</sub>Na, 258.0737, found 258.0738.

### Ethyl 3-(4-butylphenyl)-2-(hydroxyimino)-3-oxopropanoate 6c

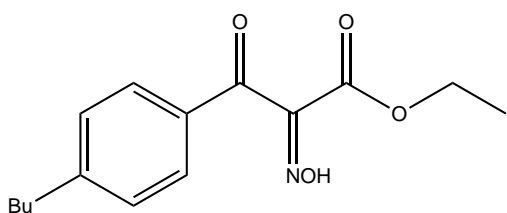

Method B: Yield (3.19 g, 83%); Thick orange oil;  $\nu_{\text{max}}/\text{cm}^{-1}$  3256 (O-

H), 2958 (C-H), 2932 (C-H), 2861 (C-H), 1724 (C=O), 1680 (C=O),

1605 (C=N); 3.8:1 mixture of *E/Z* isomers;  $\delta_{\text{H}}$  (Major isomer) (400 MHz,

CDCl<sub>3</sub>) 0.94 (3H, m, CH<sub>2</sub>CH<sub>3</sub>), 1.28 (3H, t, *J*=7.1 Hz, OCH<sub>2</sub>CH<sub>3</sub>), 1.37

(2H, m, CH<sub>2</sub>CH<sub>3</sub>), 1.62 (2H, m, CH<sub>2</sub>CH<sub>2</sub>), 2.68 (2H, m, CH<sub>2</sub>CH<sub>2</sub>), 4.33 (2H, q, *J*=7.1 Hz, OCH<sub>2</sub>CH<sub>3</sub>), 7.30 (2H, d, *J*=8.4 Hz, Ar-H), 7.79 (2H, d, *J*=8.3 Hz, Ar-H);  $\delta_{\text{C}}$  (Major isomer) (101 MHz, CDCl<sub>3</sub>) 14.0 (CH<sub>2</sub>CH<sub>3</sub>), 14.1 (OCH<sub>2</sub>CH<sub>3</sub>), 22.4 (CH<sub>2</sub>CH<sub>3</sub>), 33.2 (CH<sub>2</sub>CH<sub>2</sub>), 36.0 (CH<sub>2</sub>CH<sub>2</sub>), 62.7 (OCH<sub>2</sub>CH<sub>3</sub>), 129.2 (Ar-C), 129.5 (Ar-C), 132.1 (Ar-C), 149.4 (Ar-C), 150.9 (C2), 161.3 (C1), 189.6 (C3); LRMS (ESI<sup>+</sup>) *m/z*: 300.1 ([M + Na]<sup>+</sup> 52%); LRMS (ESI<sup>-</sup>) *m/z*: 276.1 ([M - H]<sup>-</sup> 96%); HRMS (ESI<sup>-</sup>) *m/z*: [M - H]<sup>-</sup> calcd. for C<sub>15</sub>H<sub>18</sub>NO<sub>4</sub>, 276.1241, found 276.1240.

### Ethyl 2-(hydroxyimino)-3-(4-methoxyphenyl)-3-oxopropanoate 6d

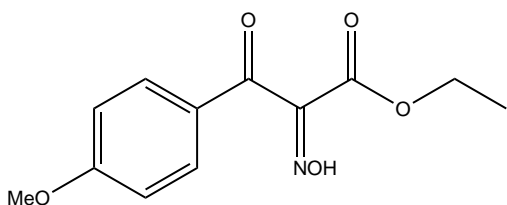

Method B: Yield (3.39 g, 93%); Orange oil;  $\nu_{\max}/\text{cm}^{-1}$  3307 (O-H), 2984 (C-H), 1719 (C=O), 1668 (C=O), 1594 (C=N); 5.7:1 mixture of *E/Z* isomers;  $\delta_{\text{H}}$  (Major isomer) (400 MHz,  $\text{CDCl}_3$ ) 1.23 (3H, t,  $J=7.1$  Hz,  $\text{OCH}_2\text{CH}_3$ ), 3.87 (3H, s,  $\text{OCH}_3$ ), 4.28 (2H, q,  $J=7.1$  Hz,  $\text{OCH}_2\text{CH}_3$ ), 6.96 (2H, d,  $J=8.9$  Hz, Ar-H), 7.83 (2H, d,  $J=8.9$  Hz, Ar-H), 9.99 (1H, br s, OH);  $\delta_{\text{C}}$  (Major isomer) (101 MHz,  $\text{CDCl}_3$ ) 14.0 ( $\text{OCH}_2\text{CH}_3$ ), 55.8 ( $\text{OCH}_3$ ), 62.7 ( $\text{OCH}_2\text{CH}_3$ ), 114.5 (Ar-C), 127.6 (Ar-C), 131.9 (Ar-C), 150.0 (C2), 161.0 (C1), 165.0 (Ar-C), 188.4 (C3); LRMS ( $\text{ESI}^+$ )  $m/z$ : 274.1 ( $[\text{M} + \text{Na}]^+$  24%); LRMS ( $\text{ESI}^-$ )  $m/z$ : 250.1 ( $[\text{M} - \text{H}]^-$  97%); HRMS ( $\text{ESI}^-$ )  $m/z$ :  $[\text{M} - \text{H}]^-$  calcd. for  $\text{C}_{12}\text{H}_{12}\text{NO}_5$ , 250.0721, found 250.0722.

### Ethyl 3-(4-fluorophenyl)-2-(hydroxyimino)-3-oxopropanoate 6e

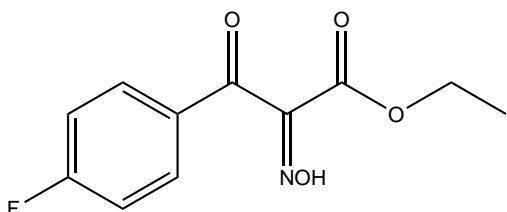

Method B: Yield (2.72 g, 73%); Yellow solid; m.p. 144-147°C; 3.6:1 mixture of *E/Z* isomers;  $\nu_{\max}/\text{cm}^{-1}$  3307 (O-H), 2987 (C-H), 1723 (C=O), 1678 (C=O), 1597 (C=N);  $\delta_{\text{H}}$  (Major isomer) (400 MHz,  $\text{CDCl}_3$ ) 1.23 (3H, t,  $J=7.1$  Hz,  $\text{OCH}_2\text{CH}_3$ ), 4.29 (2H, q,  $J=7.1$  Hz,  $\text{OCH}_2\text{CH}_3$ ), 7.18 (2H, app t,  $J=8.9$  Hz, Ar-H), 7.89 (2H, dd,  $J=5.3$  Hz, 8.8 Hz, Ar-H);  $\delta_{\text{C}}$  (Major isomer) (101 MHz,  $\text{CDCl}_3$ ) 14.0 ( $\text{OCH}_2\text{CH}_3$ ), 62.9 ( $\text{OCH}_2\text{CH}_3$ ), 116.6 (d,  $J=22.3$  Hz, Ar-C), 130.9 (d,  $J=2.6$  Hz, Ar-C), 132.1 (d,  $J=10.0$  Hz, Ar-C), 149.5 (C2), 160.9 (C1), 166.8 (d,  $J=257.6$  Hz, Ar-C), 188.6 (C3);  $\delta_{\text{F}}$  (Major isomer) (377 MHz,  $\text{CDCl}_3$ ) -101.67;  $\delta_{\text{H}}$  (Minor isomer) (400 MHz,  $\text{CDCl}_3$ ) 1.35 (3H, t,  $J=7.2$  Hz,  $\text{OCH}_2\text{CH}_3$ ), 4.40 (2H, q,  $J=7.1$  Hz,  $\text{OCH}_2\text{CH}_3$ ), 7.09-8.08 (4H, m, Ar-H);  $\delta_{\text{C}}$  (Minor isomer) (101 MHz,  $\text{CDCl}_3$ ) 14.1 ( $\text{OCH}_2\text{CH}_3$ ), 62.8 ( $\text{OCH}_2\text{CH}_3$ ), 115.8 (d,  $J=21.7$  Hz, Ar-C), 130.9 (Ar-C), 133.4 (d,  $J=9.5$  Hz, Ar-C), 149.8 (C2), 161.6 (C1), 165.5 (d,  $J=256.7$  Hz, Ar-C), 185.6 (C3);  $\delta_{\text{F}}$  (Minor isomer) (377 MHz,  $\text{CDCl}_3$ ) -103.40; LRMS ( $\text{ESI}^+$ )  $m/z$ : 262.0 ( $[\text{M} + \text{Na}]^+$  27%); LRMS ( $\text{ESI}^-$ )  $m/z$ : 238.0 ( $[\text{M} - \text{H}]^-$  95%); HRMS ( $\text{ESI}^-$ )  $m/z$ :  $[\text{M} - \text{H}]^-$  calcd. for  $\text{C}_{11}\text{H}_9\text{NO}_4\text{F}$ , 238.0521, found 238.0521.

### Ethyl 3-(4-chlorophenyl)-2-(hydroxyimino)-3-oxopropanoate 6f

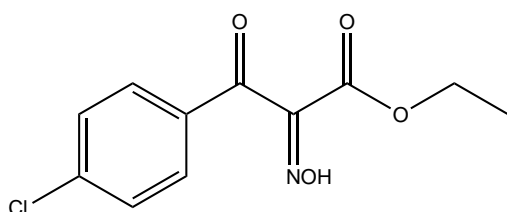

Method B: Yield (2.31 g, 78%); Off-white solid; m.p. 148-150°C; 3:1 mixture of *E/Z* isomers;  $\nu_{\max}/\text{cm}^{-1}$  3291 (O-H), 2986 (C-H), 1725 (C=O), 1681 (C=O), 1588 (C=N);  $\delta_{\text{H}}$  (Major isomer) (400 MHz,  $\text{CDCl}_3$ ) 1.24

(3H, t,  $J=7.1$  Hz, OCH<sub>2</sub>CH<sub>3</sub>), 4.29 (2H, q,  $J=7.1$  Hz, OCH<sub>2</sub>CH<sub>3</sub>), 7.48 (2H, d,  $J=8.6$  Hz, Ar-H), 7.80 (2H, d,  $J=8.6$  Hz, Ar-H);  $\delta_{\text{C}}$  (Major isomer) (101 MHz, CDCl<sub>3</sub>) 14.0 (OCH<sub>2</sub>CH<sub>3</sub>), 62.9 (OCH<sub>2</sub>CH<sub>3</sub>), 129.6 (Ar-C), 130.6 (Ar-C), 132.7 (Ar-C), 141.5 (Ar-C), 149.4 (C2), 160.8 (C1), 189.0 (C3);  $\delta_{\text{H}}$  (Minor isomer) (400 MHz, CDCl<sub>3</sub>) 1.35 (3H, t,  $J=7.1$  Hz, OCH<sub>2</sub>CH<sub>3</sub>), 4.40 (2H, q,  $J=7.1$  Hz, OCH<sub>2</sub>CH<sub>3</sub>), 7.42 (2H, d,  $J=8.6$  Hz, Ar-H), 7.95 (2H, d,  $J=8.7$  Hz, Ar-H);  $\delta_{\text{C}}$  (Minor isomer) (101 MHz, CDCl<sub>3</sub>) 14.1 (OCH<sub>2</sub>CH<sub>3</sub>), 62.8 (OCH<sub>2</sub>CH<sub>3</sub>), 128.9 (Ar-C), 132.0 (Ar-C), 133.6 (Ar-C), 140.6 (Ar-C), 149.8 (C2), 161.5 (C1), 186.0 (C3); LRMS (ESI<sup>+</sup>)  $m/z$ : 278.0 ([M<sup>35</sup> + Na]<sup>+</sup> 32%), 280.0 ([M<sup>37</sup> + Na]<sup>+</sup> 10%); LRMS (ESI<sup>-</sup>)  $m/z$ : 254.0 ([M<sup>35</sup> - H]<sup>-</sup> 98%), 255.9 ([M<sup>37</sup> - H]<sup>-</sup> 31%); HRMS (ESI<sup>-</sup>)  $m/z$ : [M<sup>35</sup> - H]<sup>-</sup> calcd. for C<sub>11</sub>H<sub>9</sub>NO<sub>4</sub>Cl, 254.0226, found 254.0226; [M<sup>37</sup> - H]<sup>-</sup> calcd. for C<sub>11</sub>H<sub>9</sub>NO<sub>4</sub>Cl, 256.0197, found 256.0196.

### Ethyl 3-(4-bromophenyl)-2-(hydroxyimino)-3-oxopropanoate **6g**

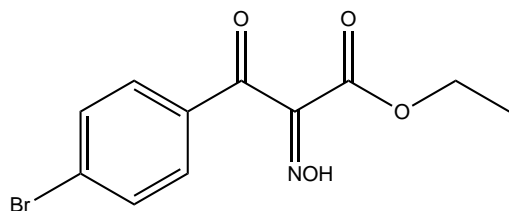

Method B: Yield (2.77 g, 86%); Off-white solid; m.p. 141-144°C; 3.5:1 mixture of *E/Z* isomers;  $\nu_{\text{max}}/\text{cm}^{-1}$  3336 (O-H), 2986 (C-H), 1721 (C=O), 1682 (C=O), 1585 (C=N);  $\delta_{\text{H}}$  (Major isomer) (400 MHz, CDCl<sub>3</sub>) 1.24 (3H, t,  $J=7.1$  Hz, OCH<sub>2</sub>CH<sub>3</sub>), 4.29 (2H, q,  $J=7.1$  Hz, OCH<sub>2</sub>CH<sub>3</sub>),

7.65 (2H, d,  $J=8.6$  Hz, Ar-H), 7.72 (2H, d,  $J=8.6$  Hz, Ar-H), 10.12 (1H, br s, OH);  $\delta_{\text{C}}$  (Major isomer) (101 MHz, CDCl<sub>3</sub>) 14.0 (OCH<sub>2</sub>CH<sub>3</sub>), 62.9 (OCH<sub>2</sub>CH<sub>3</sub>), 130.4 (Ar-C), 130.7 (Ar-C), 132.6 (Ar-C), 133.1 (Ar-C), 149.4 (C2), 160.7 (C1), 189.2 (C3);  $\delta_{\text{H}}$  (Minor isomer) (400 MHz, CDCl<sub>3</sub>) 1.35 (3H, t,  $J=7.1$  Hz, OCH<sub>2</sub>CH<sub>3</sub>), 4.40 (2H, q,  $J=7.2$  Hz, OCH<sub>2</sub>CH<sub>3</sub>), 7.58 (2H, d,  $J=8.7$  Hz, Ar-H), 7.86 (2H, d,  $J=8.6$  Hz, Ar-H);  $\delta_{\text{C}}$  (Minor isomer) (101 MHz, CDCl<sub>3</sub>) 14.1 (OCH<sub>2</sub>CH<sub>3</sub>), 62.8 (OCH<sub>2</sub>CH<sub>3</sub>), 130.4 (Ar-C), 131.9 (Ar-C), 132.0 (Ar-C), 133.1 (Ar-C), 149.7 (C2), 161.5 (C1), 186.2 (C3); LRMS (ESI<sup>-</sup>)  $m/z$ : 297.9 ([M<sup>79</sup> - H]<sup>-</sup> 92%), 299.9 ([M<sup>81</sup> - H]<sup>-</sup> 96%); HRMS (ESI<sup>-</sup>)  $m/z$ : [M<sup>79</sup> - H]<sup>-</sup> calcd. for C<sub>11</sub>H<sub>9</sub>NO<sub>4</sub>Br, 297.9720, found 297.9719; [M<sup>81</sup> - H]<sup>-</sup> calcd. for C<sub>11</sub>H<sub>9</sub>NO<sub>4</sub>Br, 299.9699, found 299.9698.

### General procedure for the synthesis of *erythro*-phenylserine **7**:<sup>8-9</sup>

A solution of oxime **6a-g** (1 eq.) dissolved in EtOH and concentrated HCl was hydrogenated in the presence of 10% Pd-C under ambient pressure and temperature for a period of 1-3 d. The reaction mixture was then diluted with water and Pd-C was filtered off x4 under vacuum filtration. The filtrate was then separated between Et<sub>2</sub>O

and H<sub>2</sub>O and the aqueous layer was concentrated under reduced pressure to give the desired *allo*-phenylserine as a hydrochloride salt **7a-f** and was used without further purification.

#### Ethyl (2*S*\*,3*S*\*)-2-amino-3-hydroxy-3-phenylpropanoate hydrochloride salt **7a**

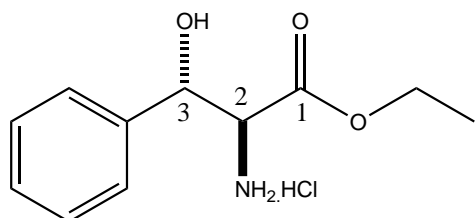

Yield (3.58 g, 75%); Off-white solid; m.p. 197-201°C (lit.<sup>8</sup> 176°C);  $\nu_{\max}/\text{cm}^{-1}$  3311 (N-H/O-H), 3136 (N-H/O-H), 2990 (C-H), 2868 (C-H), 1743 (C=O);  $\delta_{\text{H}}$  (400 MHz, D<sub>2</sub>O) 1.12 (3H, t,  $J=7.2$  Hz, OCH<sub>2</sub>CH<sub>3</sub>), 4.15 (2H, dq,  $J=2.2$  Hz, 7.2 Hz, OCH<sub>2</sub>CH<sub>3</sub>), 4.44 (1H, d,  $J=4.2$  Hz, H<sub>2</sub>), 5.36 (1H, d,  $J=4.1$  Hz, H<sub>3</sub>), 7.34-7.46 (5H, m, Ar-H);  $\delta_{\text{C}}$  (101 MHz, D<sub>2</sub>O) 13.0 (OCH<sub>2</sub>CH<sub>3</sub>), 58.5 (C<sub>2</sub>), 63.5 (OCH<sub>2</sub>CH<sub>3</sub>), 70.9 (C<sub>3</sub>), 125.9 (Ar-C), 128.8 (Ar-C), 129.0 (Ar-C), 136.9 (Ar-C), 167.4 (C<sub>1</sub>); LRMS (ESI<sup>+</sup>)  $m/z$ : 210.4 ([M + H]<sup>+</sup> 7%), 419.7 ([2M + H]<sup>+</sup> 97%); HRMS (ESI<sup>+</sup>)  $m/z$ : [M + H]<sup>+</sup> calcd. for C<sub>11</sub>H<sub>16</sub>NO<sub>3</sub>, 210.1125, found 210.1128.

#### Ethyl (2*S*\*,3*S*\*)-2-amino-3-hydroxy-3-(*p*-tolyl)propanoate hydrochloride salt **7b**

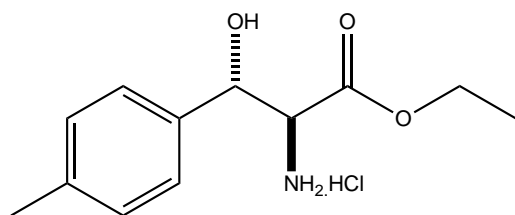

Yield (735 mg, 27%); Off-white solid; m.p. 171-173°C;  $\nu_{\max}/\text{cm}^{-1}$  3307 (N-H/O-H), 3134 (N-H/O-H), 2989 (C-H), 2908 (C-H), 2863 (C-H), 1745 (C=O);  $\delta_{\text{H}}$  (400 MHz, D<sub>2</sub>O) 1.19 (3H, t,  $J=7.1$  Hz, OCH<sub>2</sub>CH<sub>3</sub>), 2.36 (3H, s, CH<sub>3</sub>), 4.22 (2H, dq,  $J=2.4$  Hz, 7.1 Hz, OCH<sub>2</sub>CH<sub>3</sub>), 4.46 (1H, d,  $J=4.2$  Hz, H<sub>2</sub>), 5.38 (1H, d,  $J=4.1$  Hz, H<sub>3</sub>), 7.29-7.34 (4H, m, Ar-H);  $\delta_{\text{C}}$  (101 MHz, D<sub>2</sub>O) 13.0 (OCH<sub>2</sub>CH<sub>3</sub>), 20.2 (CH<sub>3</sub>), 58.5 (C<sub>2</sub>), 63.6 (OCH<sub>2</sub>CH<sub>3</sub>), 70.8 (C<sub>3</sub>), 126.0 (Ar-C), 129.4 (Ar-C), 133.9 (Ar-C), 139.4 (Ar-C), 167.5 (C<sub>1</sub>); LRMS (ESI<sup>+</sup>)  $m/z$ : 246.0 ([M + Na]<sup>+</sup> 15%); HRMS (ESI<sup>+</sup>)  $m/z$ : [M + H]<sup>+</sup> calcd. for C<sub>12</sub>H<sub>18</sub>NO<sub>3</sub>, 224.1281, found 224.1282.

#### Ethyl (2*S*\*,3*S*\*)-2-amino-3-(4-butylphenyl)-3-hydroxypropanoate hydrochloride salt **7c**

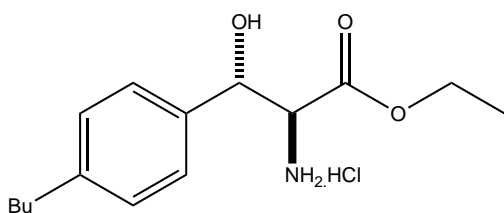

Yield (2.51 g, 72%); Brown gummy semi-solid;  $\nu_{\max}/\text{cm}^{-1}$  3318 (N-H/O-H), 3135 (N-H/O-H), 2954 (C-H), 2927 (C-H), 2859 (C-H), 1747 (C=O);  $\delta_{\text{H}}$  (400 MHz, CD<sub>3</sub>OD) 0.92 (3H, m, CH<sub>2</sub>CH<sub>3</sub>), 1.12 (3H, t,  $J=7.1$  Hz, OCH<sub>2</sub>CH<sub>3</sub>), 1.35 (2H, m, CH<sub>2</sub>CH<sub>3</sub>), 1.59 (2H, m, CH<sub>2</sub>CH<sub>2</sub>), 2.62

(2H, m, CH<sub>2</sub>CH<sub>2</sub>), 4.12 (2H, q, *J*=7.1 Hz, OCH<sub>2</sub>CH<sub>3</sub>), 4.31 (1H, d, *J*=3.7 Hz, H<sub>2</sub>), 5.27 (1H, d, *J*=3.8 Hz, H<sub>3</sub>), 7.20 (2H, d, *J*=7.9 Hz, Ar-H), 7.30 (2H, d, *J*=8.0 Hz, Ar-H); δ<sub>C</sub> (101 MHz, CD<sub>3</sub>OD) 14.2 (CH<sub>3</sub>CH<sub>2</sub>), 14.2 (OCH<sub>2</sub>CH<sub>3</sub>), 23.2 (CH<sub>2</sub>CH<sub>3</sub>), 34.8 (CH<sub>2</sub>CH<sub>2</sub>), 36.2 (CH<sub>2</sub>CH<sub>2</sub>), 60.0 (C<sub>2</sub>), 63.3 (OCH<sub>2</sub>CH<sub>3</sub>), 72.1 (C<sub>3</sub>), 127.2 (Ar-C), 129.5 (Ar-C), 136.9 (Ar-C), 144.3 (Ar-C), 167.9 (C<sub>1</sub>); LRMS (ESI<sup>+</sup>) *m/z*: 266.2 ([M + H]<sup>+</sup> 15%), 288.2 ([M + Na]<sup>+</sup> 9%); HRMS (ESI<sup>+</sup>) *m/z*: [M + H]<sup>+</sup> calcd. for C<sub>15</sub>H<sub>24</sub>NO<sub>3</sub>, 266.1751, found 266.1751.

#### Ethyl (2*S*\*,3*S*\*)-2-amino-3-hydroxy-3-(4-methoxyphenyl)propanoate hydrochloride salt 7d

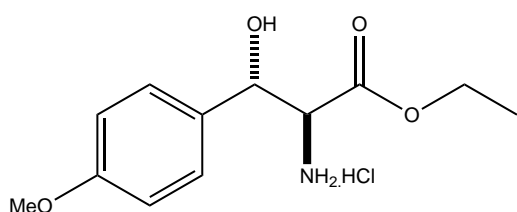

Yield (2.19 g, 67%); Off-white solid; m.p. 172-175°C (lit.<sup>9</sup> 167-170°C); ν<sub>max</sub>/cm<sup>-1</sup> 3325 (N-H/O-H), 3134 (N-H/O-H), 2906 (C-H), 2865 (C-H), 1740 (C=O); δ<sub>H</sub> (400 MHz, D<sub>2</sub>O) 1.19 (3H, t, *J*=7.2 Hz, OCH<sub>2</sub>CH<sub>3</sub>), 3.86 (3H, s, OCH<sub>3</sub>), 4.22 (2H, dq, *J*=1.7 Hz, 7.2 Hz,

OCH<sub>2</sub>CH<sub>3</sub>), 4.46 (1H, d, *J*=4.3 Hz, H<sub>2</sub>), 5.37 (1H, d, *J*=4.4 Hz, H<sub>3</sub>), 7.07 (2H, d, *J*=8.8 Hz, Ar-H), 7.37 (2H, d, *J*=8.6 Hz, Ar-H); δ<sub>C</sub> (101 MHz, D<sub>2</sub>O) 13.1 (OCH<sub>2</sub>CH<sub>3</sub>), 55.4 (OCH<sub>3</sub>), 58.5 (C<sub>2</sub>), 63.5 (OCH<sub>2</sub>CH<sub>3</sub>), 70.6 (C<sub>3</sub>), 114.3 (Ar-C), 127.5 (Ar-C), 129.5 (Ar-C), 159.2 (Ar-C), 167.5 (C<sub>1</sub>); LRMS (ESI<sup>+</sup>) *m/z*: 240.1 ([M + H]<sup>+</sup> 11%), 479.2 ([2M + H]<sup>+</sup> 74%), 501.2 ([2M + Na]<sup>+</sup> 37%); HRMS (ESI<sup>+</sup>) *m/z*: [M + H]<sup>+</sup> calcd. for C<sub>12</sub>H<sub>18</sub>NO<sub>4</sub>, 240.1230, found 240.1232.

#### Ethyl (2*S*\*,3*S*\*)-2-amino-3-(4-fluorophenyl)-3-hydroxypropanoate hydrochloride salt 7e

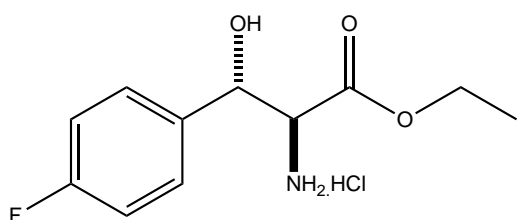

Yield (1.00 g, 66%); Off-white solid; m.p. 155-161°C; ν<sub>max</sub>/cm<sup>-1</sup> 3325 (N-H/O-H), 3138 (N-H/O-H), 2908 (C-H), 2868 (C-H), 1739 (C=O); δ<sub>H</sub> (400 MHz, D<sub>2</sub>O) 1.19 (3H, t, *J*=7.1 Hz, OCH<sub>2</sub>CH<sub>3</sub>), 4.23 (2H, q, *J*=7.1 Hz, OCH<sub>2</sub>CH<sub>3</sub>), 4.50 (1H, d, *J*=4.1 Hz, H<sub>2</sub>), 5.43 (1H, d,

*J*=4.1 Hz, H<sub>3</sub>), 7.23 (2H, app. t, *J*=8.8 Hz, Ar-H), 7.44 (2H, dd, *J*=5.2 Hz, 8.5 Hz, Ar-H); δ<sub>C</sub> (101 MHz, D<sub>2</sub>O) 13.0 (OCH<sub>2</sub>CH<sub>3</sub>), 58.5 (C<sub>2</sub>), 63.6 (OCH<sub>2</sub>CH<sub>3</sub>), 70.4 (C<sub>3</sub>), 115.7 (d, *J*=21.9 Hz, Ar-C), 128.0 (d, *J*=8.6 Hz, Ar-C), 133.1 (d, *J*=3.0 Hz, Ar-C), 162.7 (d, *J*=244.7 Hz, Ar-C), 167.4 (C<sub>1</sub>); δ<sub>F</sub> (376 MHz, D<sub>2</sub>O) -113.80; LRMS (ESI<sup>+</sup>) *m/z*: 228.1 ([M + H]<sup>+</sup> 49%), 250.1 ([M + Na]<sup>+</sup> 20%); HRMS (ESI<sup>+</sup>) *m/z*: [M + H]<sup>+</sup> calcd. for C<sub>11</sub>H<sub>15</sub>NO<sub>3</sub>F, 228.1030, found 228.1030.

#### Ethyl (2*S*\*,3*S*\*)-2-amino-3-(4-chlorophenyl)-3-hydroxypropanoate hydrochloride salt 7f

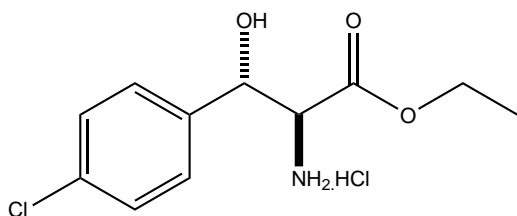

Yield (728 mg, 45%, contaminated with an unidentified impurity);

Off-white solid; m.p. 180-182°C (lit.<sup>10</sup> 168-170°C);  $\nu_{\max}/\text{cm}^{-1}$  3319

(N-H/O-H), 3140 (N-H/O-H), 2906 (C-H), 2862 (C-H), 1738 (C=O);

$\delta_{\text{H}}$  (400 MHz, D<sub>2</sub>O) 1.16 (3H, t,  $J=7.1$  Hz, OCH<sub>2</sub>CH<sub>3</sub>), 4.21 (2H, m,

OCH<sub>2</sub>CH<sub>3</sub>), 4.51 (1H, d,  $J=4.0$  Hz, H2), 5.42 (1H, d,  $J=3.8$  Hz, H3), 7.40 (2H, d,  $J=8.5$  Hz, Ar-H), 7.50 (2H, d,  $J=8.6$

Hz, Ar-H);  $\delta_{\text{C}}$  (101 MHz, D<sub>2</sub>O) 13.0 (OCH<sub>2</sub>CH<sub>3</sub>), 58.3 (C2), 63.6 (OCH<sub>2</sub>CH<sub>3</sub>), 70.4 (C3), 127.5 (Ar-C), 128.8 (Ar-C),

134.0 (Ar-C), 136.0 (Ar-C), 167.3 (C1); LRMS (ESI<sup>+</sup>)  $m/z$ : 266.1 ([M<sup>35</sup> + Na]<sup>+</sup> 4%); HRMS (ESI<sup>+</sup>)  $m/z$ : [M<sup>35</sup> + H]<sup>+</sup> calcd.

for C<sub>11</sub>H<sub>15</sub>NO<sub>3</sub>Cl, 244.0735, found 244.0736; [M<sup>37</sup> + H]<sup>+</sup> calcd. for C<sub>11</sub>H<sub>15</sub>NO<sub>3</sub>Cl, 246.0705, found 246.0707.

### Synthesis of ethyl (4S\*,5S\*)-2-oxo-5-phenyloxazolidine-4-carboxylate **8**:<sup>1,11</sup>

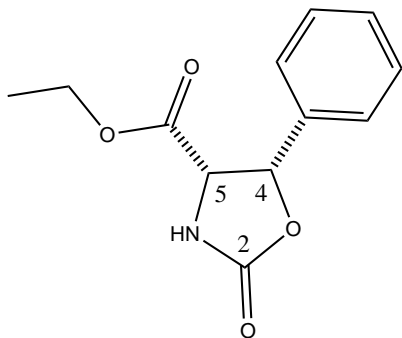

Ethyl ester hydrochloride **7a** (1.0 eq.) was suspended in THF and

triethylamine (1.2 eq.) was added and stirred at rt for 5 mins and 1,1'-

carbonyldiimidazole (CDI) (1.8 eq.) was then added and the solution was

stirred overnight at rt. The reaction mixture was then quenched with sat.

NH<sub>4</sub>Cl (aq.), extracted with EtOAc, washed with brine, dried over Na<sub>2</sub>SO<sub>4</sub>,

filtered, and concentrated *in-vacuo* to furnish oxazolidinone **8**. Yield (316

mg, Quantitative); Colourless oil;  $\nu_{\max}/\text{cm}^{-1}$  1747 (C=O);  $\delta_{\text{H}}$  (400 MHz, CDCl<sub>3</sub>) 0.79 (3H, t,  $J=7.2$  Hz, OCH<sub>2</sub>CH<sub>3</sub>), 3.60

(1H, dq,  $J=7.1$  Hz, 10.7 Hz, OCH<sub>2</sub>CH<sub>3</sub>), 3.76 (1H, m, OCH<sub>2</sub>CH<sub>3</sub>), 4.66 (1H, d,  $J=9.1$  Hz, H5), 5.83 (1H, d,  $J=9.1$  Hz,

H4), 6.39 (1H, br s, NH), 7.29-7.42 (5H, m, Ar-H);  $\delta_{\text{C}}$  (101 MHz, CDCl<sub>3</sub>) 13.6 (OCH<sub>2</sub>CH<sub>3</sub>), 60.0 (C5), 61.8 (OCH<sub>2</sub>CH<sub>3</sub>),

79.4 (C4), 126.5 (Ar-C), 128.5 (Ar-C), 129.4 (Ar-C), 134.2 (Ar-C), 159.1 (C2), 168.7 (C=O); LRMS (ESI<sup>+</sup>)  $m/z$ : 258.0

([M + Na]<sup>+</sup> 57%); HRMS (ESI<sup>+</sup>)  $m/z$ : [M + Na]<sup>+</sup> calcd. for C<sub>12</sub>H<sub>13</sub>NO<sub>4</sub>Na, 258.0737, found 258.0738.

### General procedure for the synthesis of Boc-protected amino esters **9**:

**Method A:** Amino ester **7a** (1 eq.) was suspended in DCM and cooled to 0°C. Et<sub>3</sub>N (1.1 eq.) and Boc<sub>2</sub>O (1.1-1.2

eq.) was added dropwise at 0°C. The reaction mixture was then heated to reflux overnight. The mixture was

then left to cool to rt and then washed with sat. NH<sub>4</sub>Cl (aq.), brine, dried over MgSO<sub>4</sub>, filtered and the solvent



was evaporated *in-vacuo*. The reaction mixture was then purified by flash column chromatography to obtain the desired product **9a**.

**Method B:**<sup>12</sup> Boc-protected hemimalonate **27c** (1 eq.), Et<sub>3</sub>N (1 eq.) and aldehyde (oil) (4 eq.) was stirred at 50°C for 48 h under an atmosphere of N<sub>2</sub> (caution should be taken due to the internal build-up of CO<sub>2</sub>). The reaction mixture was then directly purified by flash column chromatography to obtain the desired product.

**Method C:**<sup>12</sup> Boc-protected hemimalonate **27c** (1 eq.), Et<sub>3</sub>N (1 eq.) and aldehyde (solid) (4 eq.) dissolved in THF (3 M) was stirred at 50°C for 48 h under an atmosphere of N<sub>2</sub> (caution should be taken due to the internal build-up of CO<sub>2</sub>). The reaction mixture was then directly purified by flash column chromatography to obtain the desired product.

#### Ethyl (2*S*\*,3*S*\*)-2-((*tert*-butoxycarbonyl)amino)-3-hydroxy-3-phenylpropanoate **9a**

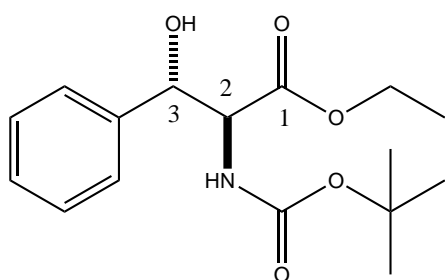

Method A: Yield (1.80 g, 75%); Method B: Yield (3.39 g, 79%); White solid; m.p. 110-115°C (lit.<sup>13</sup> 88-89°C); R<sub>f</sub> (30% EtOAc in Pet. Ether 40:60) 0.50;  $\nu_{\max}/\text{cm}^{-1}$  3438 (O-H), 2980 (C-H), 1710 (C=O);  $\delta_{\text{H}}$  (400 MHz, CDCl<sub>3</sub>) 1.11 (3H, t,  $J=7.2$  Hz, OCH<sub>2</sub>CH<sub>3</sub>), 1.36 (9H, s, C(CH<sub>3</sub>)<sub>3</sub>), 3.98 (1H, br s, OH), 4.06 (2H, q,  $J=7.2$  Hz, OCH<sub>2</sub>CH<sub>3</sub>), 4.61 (1H, br dd,  $J=3.9$  Hz, 7.9 Hz, H<sub>2</sub>),

5.12 (1H, br m, H<sub>3</sub>), 5.25 (1H, br d,  $J=7.6$  Hz, NH), 7.19-7.26 (5H, m, Ar-H);  $\delta_{\text{C}}$  (101 MHz, CDCl<sub>3</sub>) 14.1 (OCH<sub>2</sub>CH<sub>3</sub>), 28.4 ((CH<sub>3</sub>)<sub>3</sub>), 59.9 (C<sub>2</sub>), 61.8 (OCH<sub>2</sub>CH<sub>3</sub>), 75.2 (C<sub>3</sub>), 80.7 (C(CH<sub>3</sub>)<sub>3</sub>), 126.2 (Ar-C), 128.1 (Ar-C), 128.3 (Ar-C), 139.4 (Ar-C), 156.5 (C=O), 169.9 (C<sub>1</sub>); LRMS (ESI<sup>+</sup>)  $m/z$ : 332.2 ([M + Na]<sup>+</sup> 95%); HRMS (ESI<sup>+</sup>)  $m/z$ : [M + Na]<sup>+</sup> calcd. for C<sub>16</sub>H<sub>23</sub>NO<sub>5</sub>Na, 332.1468, found 332.1468.

#### Ethyl (2*S*\*,3*S*\*)-3-(4-bromophenyl)-2-((*tert*-butoxycarbonyl)amino)-3-hydroxypropanoate **9b**

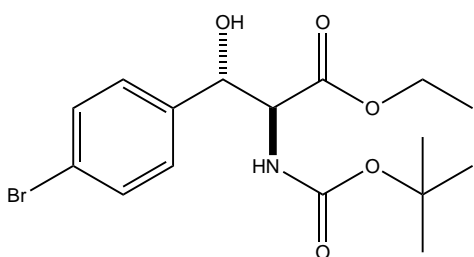

Method C: Yield (1.01 g, 64%); White solid; m.p. 136-140°C (lit.<sup>13</sup> 123-124°C); R<sub>f</sub> (30% EtOAc in Pet. Ether 40:60) 0.48;  $\nu_{\max}/\text{cm}^{-1}$  3426 (O-H), 2980 (C-H), 1696 (C=O);  $\delta_{\text{H}}$  (400 MHz, CDCl<sub>3</sub>) 1.22 (3H, t,  $J=7.1$  Hz, OCH<sub>2</sub>CH<sub>3</sub>), 1.44 (9H, s, C(CH<sub>3</sub>)<sub>3</sub>), 4.16 (2H, m, OCH<sub>2</sub>CH<sub>3</sub>), 4.65 (1H, br dd,  $J=3.7$  Hz, 7.3 Hz, H<sub>2</sub>), 5.16 (1H, br d,  $J=3.7$  Hz, H<sub>3</sub>), 5.30 (1H, br m,

NH), 7.15 (2H, d,  $J=8.1$  Hz, Ar-H), 7.45 (2H, d,  $J=8.3$  Hz, Ar-H);  $\delta_c$  (101 MHz,  $\text{CDCl}_3$ ) 14.2 ( $\text{OCH}_2\text{CH}_3$ ), 28.4 ( $(\text{CH}_3)_3$ ), 59.9 (C2), 62.1 ( $\text{OCH}_2\text{CH}_3$ ), 74.9 (C3), 81.0 ( $\text{C}(\text{CH}_3)_3$ ), 122.0 (Ar-C), 128.0 (Ar-C), 131.4 (Ar-C), 138.6 (Ar-C), 156.7 (C=O), 169.6 (C1); LRMS ( $\text{ESI}^+$ )  $m/z$ : 410.0 ( $[\text{M}^{79} + \text{Na}]^+$  95%), 412.0 ( $[\text{M}^{81} + \text{Na}]^+$  86%); HRMS ( $\text{ESI}^+$ )  $m/z$ :  $[\text{M}^{79} + \text{Na}]^+$  calcd. for  $\text{C}_{16}\text{H}_{22}\text{NO}_5\text{BrNa}$ , 410.0574, found 410.0573;  $[\text{M}^{81} + \text{Na}]^+$  calcd. for  $\text{C}_{16}\text{H}_{22}\text{NO}_5\text{BrNa}$ , 412.0554, found 412.0551.

**Ethyl (2*S*\*,3*S*\*)-2-((*tert*-butoxycarbonyl)amino)-3-(4-cyanophenyl)-3-hydroxypropanoate 9c**

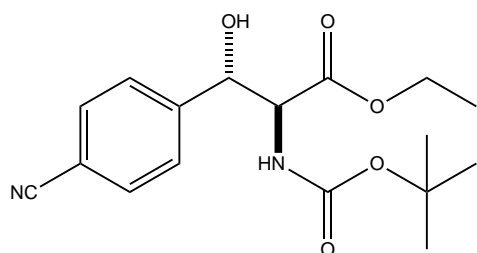

Method C: Yield (930 mg, 69%); Pale yellow oil that solidified overnight to a white solid; m.p. 109-113°C;  $R_f$  (30% EtOAc in Pet. Ether 40:60) 0.40;  $\nu_{\text{max}}/\text{cm}^{-1}$  3432 (O-H), 2981 (C-H), 2229 ( $\text{C}\equiv\text{N}$ ), 1696 (C=O);  $\delta_H$  (400 MHz,  $\text{CDCl}_3$ ) 1.20 (3H, t,  $J=7.1$  Hz,  $\text{OCH}_2\text{CH}_3$ ), 1.43 (9H, s,  $\text{C}(\text{CH}_3)_3$ ), 4.16 (2H, q,  $J=7.1$  Hz,  $\text{OCH}_2\text{CH}_3$ ), 4.40 (1H, br s, OH), 4.67 (1H, br dd,  $J=3.5$  Hz, 7.0 Hz, H2), 5.25 (1H, br d,  $J=3.3$  Hz, H3), 5.37 (1H, br d,  $J=6.9$  Hz, NH), 7.41 (2H, d,  $J=8.0$  Hz, Ar-H), 7.62 (2H, d,  $J=8.3$  Hz, Ar-H);  $\delta_c$  (101 MHz,  $\text{CDCl}_3$ ) 14.1 ( $\text{OCH}_2\text{CH}_3$ ), 28.3 ( $(\text{CH}_3)_3$ ), 60.0 (C2), 62.2 ( $\text{OCH}_2\text{CH}_3$ ), 74.9 (C3), 81.2 ( $\text{C}(\text{CH}_3)_3$ ), 111.8 (Ar-C), 118.8 ( $\text{C}\equiv\text{N}$ ), 127.1 (Ar-C), 132.1 (Ar-C), 145.1 (Ar-C), 156.6 (C=O), 169.2 (C1); LRMS ( $\text{ESI}^+$ )  $m/z$ : 357.2 ( $[\text{M} + \text{Na}]^+$  10%); HRMS ( $\text{ESI}^+$ )  $m/z$ :  $[\text{M} + \text{Na}]^+$  calcd. for  $\text{C}_{17}\text{H}_{22}\text{N}_2\text{O}_5\text{Na}$ , 357.1421, found 357.1421.

**Ethyl (2*S*\*,3*S*\*)-2-((*tert*-butoxycarbonyl)amino)-3-hydroxy-3-(4-(trifluoromethyl)phenyl)-propanoate 9d**

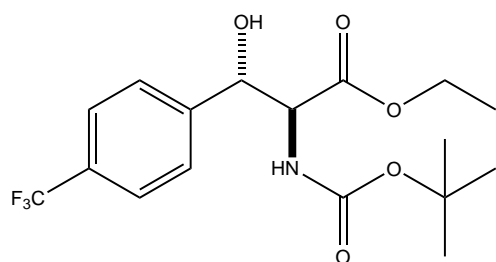

Method B: Yield (1.09 g, 62%); Pale yellow oil that solidified to a white solid overnight; m.p. 111-115°C;  $R_f$  (30% EtOAc in Pet. Ether 40:60) 0.53;  $\nu_{\text{max}}/\text{cm}^{-1}$  3430 (O-H), 2982 (C-H), 1692 (C=O);  $\delta_H$  (400 MHz,  $\text{CDCl}_3$ ) 1.18 (3H, t,  $J=7.1$  Hz,  $\text{OCH}_2\text{CH}_3$ ), 1.43 (9H, s,  $\text{C}(\text{CH}_3)_3$ ), 4.15 (2H, q,  $J=7.1$  Hz,  $\text{OCH}_2\text{CH}_3$ ), 4.69 (1H, br dd,  $J=3.7$  Hz, 7.6 Hz, H2), 5.25 (1H, br d,  $J=3.5$  Hz, H3), 5.36 (1H, br d,  $J=7.2$  Hz, NH), 7.40 (2H, d,  $J=8.1$  Hz, Ar-H), 7.58 (2H, d,  $J=8.1$  Hz, Ar-H);  $\delta_c$  (101 MHz,  $\text{CDCl}_3$ ) 14.1 ( $\text{OCH}_2\text{CH}_3$ ), 28.3 ( $(\text{CH}_3)_3$ ), 59.9 (C2), 62.1 ( $\text{OCH}_2\text{CH}_3$ ), 74.9 (C3), 81.1 ( $\text{C}(\text{CH}_3)_3$ ), 124.2 (q,  $J=272.3$  Hz,  $\text{CF}_3$ ), 125.2 (q,  $J=3.8$  Hz, Ar-C), 126.7 (Ar-C), 130.3 (q,  $J=32.4$  Hz, Ar-C), 143.7 (Ar-C), 156.6

(C=O), 169.5 (C1);  $\delta_F$  (376 MHz,  $CDCl_3$ ) -62.57; LRMS (ESI<sup>+</sup>)  $m/z$ : 400.2 ([M + Na]<sup>+</sup> 52%); HRMS (ESI<sup>+</sup>)  $m/z$ : [M + Na]<sup>+</sup> calcd. for  $C_{17}H_{22}F_3NO_5Na$ , 400.1342, found 400.1343.

### Ethyl (2S\*,3S\*)-2-((tert-butoxycarbonyl)amino)-3-hydroxy-3-(4-nitrophenyl)propanoate 9e

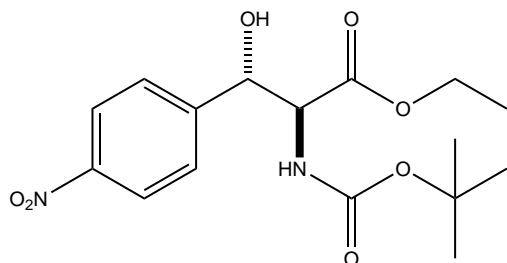

Method C: Yield (1.15 g, 73%); Pale yellow solid; m.p. 117-120°C (lit.<sup>13</sup> 108°C);  $R_f$  (30% EtOAc in Pet. Ether 40:60) 0.38;  $\nu_{max}/cm^{-1}$  3416 (O-H), 2981 (C-H), 1735 (C=O), 1694 (C=O), 1520 (N-O);  $\delta_H$  (400 MHz,  $CDCl_3$ ) 1.21 (3H, t,  $J=6.9$  Hz,  $OCH_2CH_3$ ), 1.43 (9H, s,  $C(CH_3)_3$ ), 4.18 (2H, q,  $J=7.1$  Hz,  $OCH_2CH_3$ ), 4.69 (1H, br dd,  $J=3.5$  Hz,

7.0 Hz, H2), 5.31 (1H, br d,  $J=3.3$  Hz, H3), 5.39 (1H, br d,  $J=6.8$  Hz, NH), 7.47 (2H, d,  $J=8.4$  Hz, Ar-H), 8.18 (2H, d,  $J=8.8$  Hz, Ar-H);  $\delta_C$  (101 MHz,  $CDCl_3$ ) 14.2 ( $OCH_2CH_3$ ), 28.3 ( $(CH_3)_3$ ), 60.0 (C2), 62.3 ( $OCH_2CH_3$ ), 74.9 (C3), 81.3 ( $C(CH_3)_3$ ), 123.5 (Ar-C), 127.2 (Ar-C), 147.1 (Ar-C), 147.7 (Ar-C), 156.7 (C=O), 169.1 (C1); LRMS (ESI<sup>+</sup>)  $m/z$ : 377.0 ([M + Na]<sup>+</sup> 9%); HRMS (ESI<sup>+</sup>)  $m/z$ : [M + Na]<sup>+</sup> calcd. for  $C_{16}H_{22}N_2O_7Na$ , 377.1319, found 377.1318.

### Ethyl (2S\*,3S\*)-2-((tert-butoxycarbonyl)amino)-3-hydroxy-3-(3-methoxyphenyl)propanoate 9f

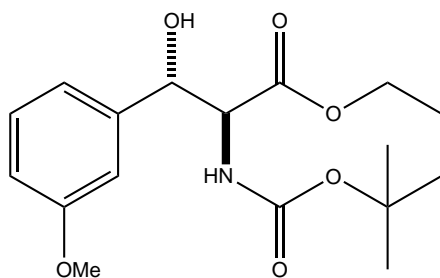

Method B: Yield (995 mg, 69%); White solid; m.p. 108-110°C;  $R_f$  (50% EtOAc in Pet. Ether 40:60) 0.70;  $\nu_{max}/cm^{-1}$  3435 (O-H), 2979 (C-H), 1701 (C=O);  $\delta_H$  (400 MHz,  $CDCl_3$ ) 1.22 (3H, t,  $J=7.1$  Hz,  $OCH_2CH_3$ ), 1.45 (9H, s,  $C(CH_3)_3$ ), 3.80 (3H, s,  $OCH_3$ ), 4.02 (1H, br s, OH), 4.17 (2H, q,  $J=7.1$  Hz,  $OCH_2CH_3$ ), 4.69 (1H, br dd,  $J=3.8$  Hz, 7.9 Hz, H2), 5.19 (1H, br m, H3), 5.31

(1H, br d,  $J=7.5$  Hz, NH), 6.81-6.85 (3H, m, Ar-H), 7.22-7.28 (1H, m, Ar-H);  $\delta_C$  (101 MHz,  $CDCl_3$ ) 14.1 ( $OCH_2CH_3$ ), 28.4 ( $(CH_3)_3$ ), 55.3 ( $OCH_3$ ), 59.9 (C2), 61.9 ( $OCH_2CH_3$ ), 75.1 (C3), 80.8 ( $C(CH_3)_3$ ), 111.8 (Ar-C), 113.7 (Ar-C), 118.5 (Ar-C), 129.4 (Ar-C), 141.1 (Ar-C), 156.6 (C=O), 159.8 (Ar-C), 169.9 (C1); LRMS (ESI<sup>+</sup>)  $m/z$ : 362.2 ([M + Na]<sup>+</sup> 97%); HRMS (ESI<sup>+</sup>)  $m/z$ : [M + Na]<sup>+</sup> calcd. for  $C_{17}H_{25}NO_6Na$ , 362.1574, found 362.1573.

### Ethyl (2S\*,3S\*)-2-((tert-butoxycarbonyl)amino)-3-(3-chlorophenyl)-3-hydroxypropanoate 9g

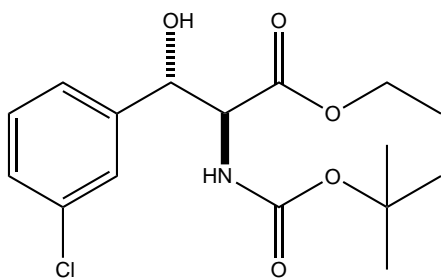

Method B: Yield (1.07 g, 72%); Pale yellow oil that solidified to a white solid overnight; m.p. 56-60°C;  $R_f$  (40% EtOAc in Pet. Ether 40:60) 0.75;  $\nu_{\max}/\text{cm}^{-1}$  3427 (O-H), 2980 (C-H), 1694 (C=O);  $\delta_H$  (400 MHz,  $\text{CDCl}_3$ ) 1.22 (3H, t,  $J=7.0$  Hz,  $\text{OCH}_2\text{CH}_3$ ), 1.45 (9H, s,  $\text{C}(\text{CH}_3)_3$ ), 4.17 (2H, dq,  $J=1.8$  Hz, 7.4 Hz,  $\text{OCH}_2\text{CH}_3$ ), 4.66 (1H, br dd,  $J=3.6$  Hz, 7.4 Hz, H2), 5.19 (1H, br d,

$J=3.6$  Hz, H3), 5.37 (1H, br d,  $J=7.2$  Hz, NH), 7.15 (1H, m, Ar-H), 7.25-7.27 (2H, m, Ar-H), 7.30 (1H, m, Ar-H);  $\delta_C$  (101 MHz,  $\text{CDCl}_3$ ) 14.1 ( $\text{OCH}_2\text{CH}_3$ ), 28.4 ( $(\text{CH}_3)_3$ ), 60.0 (C2), 62.1 ( $\text{OCH}_2\text{CH}_3$ ), 74.9 (C3), 81.1 ( $\text{C}(\text{CH}_3)_3$ ), 124.4 (Ar-C), 126.6 (Ar-C), 128.2 (Ar-C), 129.6 (Ar-C), 134.4 (Ar-C), 141.7 (Ar-C), 156.7 (C=O), 169.5 (C1); LRMS ( $\text{ESI}^+$ )  $m/z$ : 366.0 ( $[\text{M}^{35} + \text{Na}]^+$  96%), 368.0 ( $[\text{M}^{37} + \text{Na}]^+$  39%); HRMS ( $\text{ESI}^+$ )  $m/z$ :  $[\text{M}^{35} + \text{Na}]^+$  calcd. for  $\text{C}_{16}\text{H}_{22}\text{NO}_5\text{ClNa}$ , 366.1079, found 366.1079;  $[\text{M}^{37} + \text{Na}]^+$  calcd. for  $\text{C}_{16}\text{H}_{22}\text{NO}_5\text{ClNa}$ , 368.1050, found 368.1050.

#### Ethyl (2S\*,3S\*)-2-((tert-butoxycarbonyl)amino)-3-(3-bromophenyl)-3-hydroxypropanoate 9h

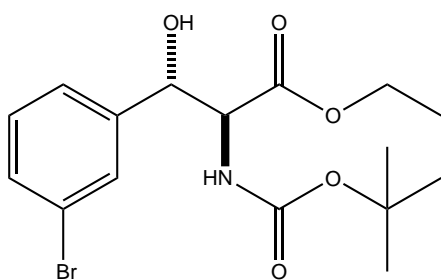

Method B: Yield (1.15 g, 70%); Colourless oil that solidified to a white solid overnight; m.p. 83-87°C;  $R_f$  (20% EtOAc in Pet. Ether 40:60) 0.28;  $\nu_{\max}/\text{cm}^{-1}$  3424 (O-H), 2979 (C-H), 1692 (C=O);  $\delta_H$  (400 MHz,  $\text{CDCl}_3$ ) 1.21 (3H, t,  $J=7.1$  Hz,  $\text{OCH}_2\text{CH}_3$ ), 1.44 (9H, s,  $\text{C}(\text{CH}_3)_3$ ), 4.15 (2H, m,  $\text{OCH}_2\text{CH}_3$ ), 4.64 (1H, br dd,  $J=3.6$  Hz, 7.4 Hz, H2), 5.17 (1H, br d,  $J=3.6$  Hz, H3), 5.37

(1H, br d,  $J=7.2$  Hz, NH), 7.18-7.19 (2H, m, Ar-H), 7.39-7.41 (1H, m, Ar-H), 7.44 (1H, m, Ar-H);  $\delta_C$  (101 MHz,  $\text{CDCl}_3$ ) 14.1 ( $\text{OCH}_2\text{CH}_3$ ), 28.4 ( $(\text{CH}_3)_3$ ), 60.0 (C2), 62.1 ( $\text{OCH}_2\text{CH}_3$ ), 74.8 (C3), 81.0 ( $\text{C}(\text{CH}_3)_3$ ), 122.5 (Ar-C), 124.8 (Ar-C), 129.5 (Ar-C), 129.9 (Ar-C), 131.1 (Ar-C), 141.9 (Ar-C), 156.6 (C=O), 169.5 (C1); LRMS ( $\text{ESI}^+$ )  $m/z$ : 410.0 ( $[\text{M}^{79} + \text{Na}]^+$  96%), 412.0 ( $[\text{M}^{81} + \text{Na}]^+$  89%); HRMS ( $\text{ESI}^+$ )  $m/z$ :  $[\text{M}^{79} + \text{Na}]^+$  calcd. for  $\text{C}_{16}\text{H}_{22}\text{NO}_5\text{BrNa}$ , 410.0574, found 410.0573;  $[\text{M}^{81} + \text{Na}]^+$  calcd. for  $\text{C}_{16}\text{H}_{22}\text{NO}_5\text{BrNa}$ , 412.0554, found 412.0551.

#### Ethyl (2S\*,3S\*)-2-((tert-butoxycarbonyl)amino)-3-(2-fluorophenyl)-3-hydroxypropanoate 9i

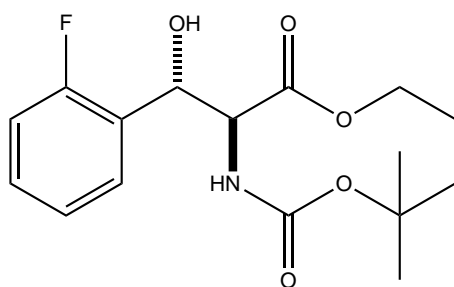

Method B: Yield (933 mg, 68%); Colourless oil;  $R_f$  (20% EtOAc in Pet. Ether 40:60) 0.25;  $\nu_{\max}/\text{cm}^{-1}$  3430 (O-H), 2980 (C-H), 1716 (C=O), 1696 (C=O);  $\delta_H$  (400 MHz,  $\text{CDCl}_3$ ) 1.21 (3H, t,  $J=7.0$  Hz,  $\text{OCH}_2\text{CH}_3$ ), 1.43 (9H, s,  $\text{C}(\text{CH}_3)_3$ ), 4.15 (2H, m,  $\text{OCH}_2\text{CH}_3$ ), 4.72 (1H, br m, H2), 5.38 (1H, br m, NH), 5.47 (1H, br m, H3), 7.00 (1H, m, Ar-H), 7.15 (1H, dt,  $J=1.2$  Hz, 7.6

Hz, Ar-H), 7.27 (1H, m, Ar-H), 7.44 (1H, dt,  $J=1.8$  Hz, 7.6 Hz, Ar-H);  $\delta_C$  (101 MHz,  $\text{CDCl}_3$ ) 14.0 ( $\text{OCH}_2\text{CH}_3$ ), 28.3 ( $(\text{CH}_3)_3$ ), 59.3 (C2), 62.1 ( $\text{OCH}_2\text{CH}_3$ ), 70.2 (C3), 80.8 ( $\text{C}(\text{CH}_3)_3$ ), 115.1 (d,  $J=22.0$  Hz, Ar-C), 124.2 (d,  $J=3.5$  Hz, Ar-C), 126.7 (d,  $J=13.6$  Hz, Ar-C), 128.3 (Ar-C), 129.6 (d,  $J=8.3$  Hz, Ar-C), 156.7 (C=O), 159.7 (d,  $J=245.0$  Hz, Ar-C), 169.8 (C1);  $\delta_F$  (376 MHz,  $\text{CDCl}_3$ ) -117.84; LRMS (ESI<sup>+</sup>)  $m/z$ : 350.2 ( $[\text{M} + \text{Na}]^+$  96%); HRMS (ESI<sup>+</sup>)  $m/z$ :  $[\text{M} + \text{Na}]^+$  calcd. for  $\text{C}_{16}\text{H}_{22}\text{NO}_5\text{FNa}$ , 350.1374, found 350.1375.

#### Ethyl (2S\*,3S\*)-3-(2-bromophenyl)-2-((tert-butoxycarbonyl)amino)-3-hydroxypropanoate 9j

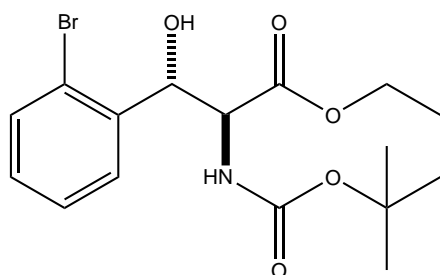

Method B: Yield (1.43 g, 88%); Colourless oil;  $R_f$  (20% EtOAc in Pet. Ether 40:60) 0.33;  $\nu_{\max}/\text{cm}^{-1}$  3428 (O-H), 2979 (C-H), 1717 (C=O), 1695 (C=O);  $\delta_H$  (400 MHz,  $\text{CDCl}_3$ ) 1.09 (3H, t,  $J=7.1$  Hz,  $\text{OCH}_2\text{CH}_3$ ), 1.41 (9H, s,  $\text{C}(\text{CH}_3)_3$ ), 3.78 (1H, br s, OH), 3.97-4.30 (2H, m,  $\text{OCH}_2\text{CH}_3$ ), 4.73 (1H, br m, H2), 5.31-5.48 (2H, br m, NH, H3), 7.15 (1H, dt,  $J=1.8$  Hz, 7.7 Hz, Ar-H), 7.32

(1H, dt,  $J=1.3$  Hz, 7.6 Hz, Ar-H), 7.49 (1H, dd,  $J=1.7$  Hz, 7.8 Hz, Ar-H), 7.52 (1H, dd,  $J=1.3$  Hz, 8.0 Hz, Ar-H);  $\delta_C$  (101 MHz,  $\text{CDCl}_3$ ) 13.9 ( $\text{OCH}_2\text{CH}_3$ ), 28.4 ( $(\text{CH}_3)_3$ ), 58.1 (C2), 61.7 ( $\text{OCH}_2\text{CH}_3$ ), 73.9 (C3), 80.6 ( $\text{C}(\text{CH}_3)_3$ ), 122.4 (Ar-C), 127.5 (Ar-C), 128.5 (Ar-C), 129.6 (Ar-C), 132.8 (Ar-C), 138.9 (Ar-C), 155.7 (C=O), 170.4 (C1); LRMS (ESI<sup>+</sup>)  $m/z$ : 410.0 ( $[\text{M}^{79} + \text{Na}]^+$  97%), 412.0 ( $[\text{M}^{81} + \text{Na}]^+$  95%); HRMS (ESI<sup>+</sup>)  $m/z$ :  $[\text{M}^{79} + \text{Na}]^+$  calcd. for  $\text{C}_{16}\text{H}_{22}\text{NO}_5\text{BrNa}$ , 410.0574, found 410.0575;  $[\text{M}^{81} + \text{Na}]^+$  calcd. for  $\text{C}_{16}\text{H}_{22}\text{NO}_5\text{BrNa}$ , 412.0554, found 412.0554.

#### Ethyl (2S\*,3S\*)-2-((tert-butoxycarbonyl)amino)-3-hydroxy-3-(pyridin-3-yl)propanoate 9k

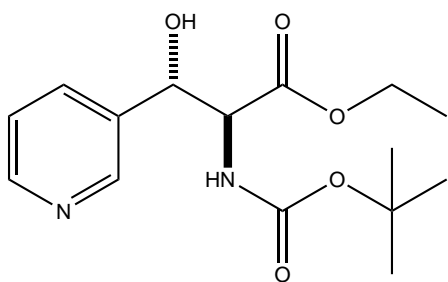

Method B: Yield (2.09 g, 79%); Colourless oil;  $R_f$  (100% EtOAc) 0.38;  $\nu_{\max}/\text{cm}^{-1}$  3348 (O-H), 2980 (C-H), 1738 (C=O), 1709 (C=O);  $\delta_H$  (400 MHz,  $\text{CDCl}_3$ ) 1.20 (3H, t,  $J=7.1$  Hz,  $\text{OCH}_2\text{CH}_3$ ), 1.43 (9H, s,  $\text{C}(\text{CH}_3)_3$ ), 4.16 (2H, m,  $\text{OCH}_2\text{CH}_3$ ), 4.68 (1H, br dd,  $J=3.9$  Hz, 7.4 Hz, H2), 4.95 (1H, br s, OH), 5.22 (1H, br d,  $J=3.8$  Hz, H3), 5.47 (1H, br d,  $J=7.4$  Hz, NH), 7.27 (1H, m, Ar-H),

7.69 (1H, m, Ar-H), 8.48 (2H, m, Ar-H);  $\delta_C$  (101 MHz,  $\text{CDCl}_3$ ) 14.1 ( $\text{OCH}_2\text{CH}_3$ ), 28.3 ( $(\text{CH}_3)_3$ ), 59.9 (C2), 62.1 ( $\text{OCH}_2\text{CH}_3$ ), 73.4 (C3), 81.0 ( $\text{C}(\text{CH}_3)_3$ ), 123.3 (Ar-C), 134.4 (Ar-C), 135.5 (Ar-C), 148.0 (Ar-C), 149.1 (Ar-C), 156.5 (C=O), 169.5 (C1); LRMS ( $\text{ESI}^+$ )  $m/z$ : 311.2 ( $[\text{M} + \text{H}]^+$  36%), 333.2 ( $[\text{M} + \text{Na}]^+$  8%); HRMS ( $\text{ESI}^+$ )  $m/z$ :  $[\text{M} + \text{H}]^+$  calcd. for  $\text{C}_{15}\text{H}_{23}\text{N}_2\text{O}_5$ , 311.1601, found 311.1600.

#### Ethyl (2*S*\*,3*R*\*)-2-((*tert*-butoxycarbonyl)amino)-3-hydroxy-3-(thiophen-2-yl)propanoate 9l

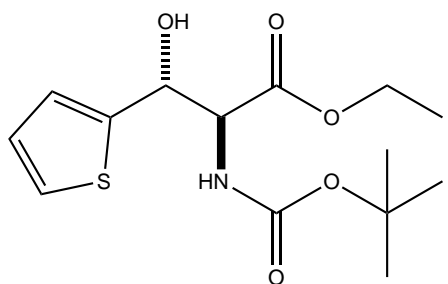

Method B: Yield (651 mg, 51%); White solid; m.p. 79-83°C;  $R_f$  (20% EtOAc in Pet. Ether 40:60) 0.23;  $\nu_{\max}/\text{cm}^{-1}$  3430 (O-H), 2979 (C-H), 1702 (C=O);  $\delta_H$  (400 MHz,  $\text{CDCl}_3$ ) 1.25 (3H, t,  $J=7.1$  Hz,  $\text{OCH}_2\text{CH}_3$ ), 1.45 (9H, s,  $\text{C}(\text{CH}_3)_3$ ), 4.20 (2H, q,  $J=7.2$  Hz,  $\text{OCH}_2\text{CH}_3$ ), 4.46 (1H, br d,  $J=5.9$  Hz, OH), 4.75 (1H, br m, H2), 5.39 (1H, br m, NH), 5.48 (1H, br m, H3), 6.88 (1H,

m, Ar-H), 6.96 (1H, dd,  $J=3.5$  Hz, 5.1 Hz, Ar-H), 7.25 (1H, dd,  $J=1.2$  Hz, 5.1 Hz, Ar-H);  $\delta_C$  (101 MHz,  $\text{CDCl}_3$ ) 14.2 ( $\text{OCH}_2\text{CH}_3$ ), 28.4 ( $(\text{CH}_3)_3$ ), 59.8 (C2), 62.2 ( $\text{OCH}_2\text{CH}_3$ ), 72.2 (C3), 81.1 ( $\text{C}(\text{CH}_3)_3$ ), 124.4 (Ar-C), 125.3 (Ar-C), 126.8 (Ar-C), 143.0 (Ar-C), 157.0 (C=O), 169.3 (C1); LRMS ( $\text{ESI}^+$ )  $m/z$ : 338.2 ( $[\text{M} + \text{Na}]^+$  98%); HRMS ( $\text{ESI}^+$ )  $m/z$ :  $[\text{M} + \text{Na}]^+$  calcd. for  $\text{C}_{14}\text{H}_{21}\text{NO}_5\text{SNa}$ , 338.1033, found 338.1035.

#### General procedure for the synthesis of oxazolidines 10:<sup>14-15</sup>

**Method A:** Amino ester **7a-f** (1.0 eq.) was suspended in petroleum ether 40:60 and cooled to 0°C. Triethylamine (1.2 eq.) and trimethylacetaldehyde (1.1 eq.) was added. The reaction mixture was heated overnight to more than 100°C with continuous removal of water using a Dean-Stark apparatus. The white/brown precipitate was then filtered and washed with  $\text{Et}_2\text{O}$ . The combined filtrates were concentrated under reduced pressure to furnish a diastereomeric mixture of oxazolidines **10a-f** and was used without further purification.

**Method B:** Amino ester **7a,g-k** (1.0 eq.) was suspended in petroleum ether 40:60 and cooled to 0°C. Triethylamine (1.2 eq.) and trimethylacetaldehyde (1.1 eq.) was added. The reaction mixture was heated overnight to more than 100°C with continuous removal of water using a Dean-Stark apparatus. The reaction mixture was then washed with brine, and the organic layer was dried over Na<sub>2</sub>SO<sub>4</sub>, filtered and concentrated under reduced pressure to furnish a diastereomeric mixture of oxazolidines **10a,g-p** and was used without further purification.

**Ethyl (4*S*\*,5*S*\*)-2-(*tert*-butyl)-5-phenyloxazolidine-4-carboxylate **10a****

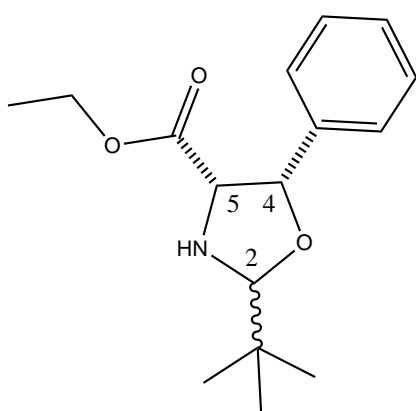

Method A: Yield (1.62 g, 81%); Method B: Yield (1.36 g, 57%); Pale yellow oil;  $\nu_{\max}/\text{cm}^{-1}$  2958 (C-H), 2872 (C-H), 1734 (C=O); 5.6:1 mixture of diastereomers at the C2-position;  $\delta_{\text{H}}$  (Major diastereomer) (400 MHz, CDCl<sub>3</sub>) 0.70 (3H, t,  $J=7.2$  Hz, OCH<sub>2</sub>CH<sub>3</sub>), 1.08 (9H, s, C(CH<sub>3</sub>)<sub>3</sub>), 2.72 (1H, br s, NH), 3.35 (1H, dq,  $J=7.2$  Hz, 10.7 Hz, OCH<sub>2</sub>CH<sub>3</sub>), 3.62 (1H, dq,  $J=7.1$  Hz, 10.7 Hz, OCH<sub>2</sub>CH<sub>3</sub>), 4.09 (1H, d,  $J=8.9$  Hz, H5), 4.15 (1H, s, H2), 4.98 (1H, d,  $J=9.0$  Hz, H4), 7.11-7.29 (5H, m, Ar-H);  $\delta_{\text{C}}$  (Major diastereomer) (101 MHz, CDCl<sub>3</sub>) 13.6 (OCH<sub>2</sub>CH<sub>3</sub>), 25.7 ((CH<sub>3</sub>)<sub>3</sub>), 33.4 (C(CH<sub>3</sub>)<sub>3</sub>), 61.2 (OCH<sub>2</sub>CH<sub>3</sub>), 65.7 (C5), 80.5 (C4), 99.0 (C2), 127.1 (Ar-C), 128.1 (Ar-C), 128.2 (Ar-C), 138.3 (Ar-C), 170.9 (C=O);  $\delta_{\text{H}}$  (Minor diastereomer) (400 MHz, CDCl<sub>3</sub>) 0.83 (3H, t,  $J=7.2$  Hz, OCH<sub>2</sub>CH<sub>3</sub>), 0.91 (9H, s, C(CH<sub>3</sub>)<sub>3</sub>), 2.72 (1H, br s, NH), 3.53 (1H, m, OCH<sub>2</sub>CH<sub>3</sub>), 3.73 (1H, m, OCH<sub>2</sub>CH<sub>3</sub>), 4.22 (1H, d,  $J=7.4$  Hz, H5), 4.94 (1H, s, H2), 5.23 (1H, d,  $J=7.3$  Hz, H4), 7.11-7.29 (5H, m, Ar-H);  $\delta_{\text{C}}$  (Minor diastereomer) (101 MHz, CDCl<sub>3</sub>) 13.8 (OCH<sub>2</sub>CH<sub>3</sub>), 25.2 ((CH<sub>3</sub>)<sub>3</sub>), 36.5 (C(CH<sub>3</sub>)<sub>3</sub>), 61.0 (OCH<sub>2</sub>CH<sub>3</sub>), 65.6 (C5), 81.3 (C4), 101.5 (C2), 126.3-139.2 (Ar-C), 170.3 (C=O); LRMS (ESI<sup>+</sup>)  $m/z$ : 278.2 ([M + H]<sup>+</sup> 77%), 300.2 ([M + Na]<sup>+</sup> 76%); HRMS (ESI<sup>+</sup>)  $m/z$ : [M + H]<sup>+</sup> calcd. for C<sub>16</sub>H<sub>24</sub>NO<sub>3</sub>, 278.1751, found 278.1749.

**Ethyl (4*S*\*,5*S*\*)-2-(*tert*-butyl)-5-(*p*-tolyl)oxazolidine-4-carboxylate **10b****

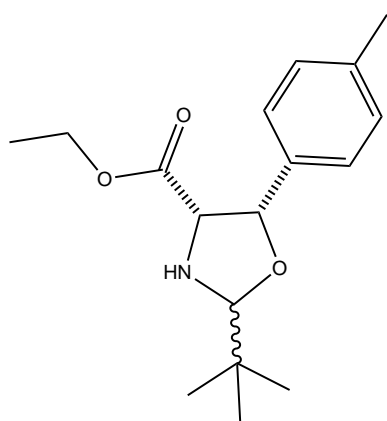

Method A: Yield (766 mg, 97%); Yellow oil;  $\nu_{\max}/\text{cm}^{-1}$  3306 (N-H), 2958 (C-H), 2871 (C-H), 1735 (C=O); 3.7:1 mixture of diastereomers at the C2-position;

$\delta_{\text{H}}$  (Major diastereomer) (400 MHz,  $\text{CDCl}_3$ ) 0.78 (3H, t,  $J=7.1$  Hz,  $\text{OCH}_2\text{CH}_3$ ), 1.14 (9H, s,  $\text{C}(\text{CH}_3)_3$ ), 2.29 (3H, s,  $\text{CH}_3$ ), 3.47 (1H, dq,  $J=7.2$  Hz, 10.7 Hz,  $\text{OCH}_2\text{CH}_3$ ), 3.70 (1H, m,  $\text{OCH}_2\text{CH}_3$ ), 4.13 (1H, d,  $J=9.0$  Hz, H5), 4.20 (1H, s, H2), 5.02 (1H, d,  $J=9.0$  Hz, H4), 7.08 (2H, m, Ar-H), 7.14 (2H, d,  $J=8.2$  Hz, Ar-H);  $\delta_{\text{C}}$  (Major diastereomer) (101 MHz,  $\text{CDCl}_3$ ) 13.5 ( $\text{OCH}_2\text{CH}_3$ ), 21.2 ( $\text{CH}_3$ ), 25.7 ( $(\text{CH}_3)_3$ ), 33.4 ( $\text{C}(\text{CH}_3)_3$ ),

61.2 ( $\text{OCH}_2\text{CH}_3$ ), 65.6 (C5), 80.5 (C4), 98.9 (C2), 127.0 (Ar-C), 128.7 (Ar-C), 135.3 (Ar-C), 137.9 (Ar-C), 171.0 (C=O);

$\delta_{\text{H}}$  (Minor diastereomer) (400 MHz,  $\text{CDCl}_3$ ) 0.93 (3H, t,  $J=7.2$  Hz,  $\text{OCH}_2\text{CH}_3$ ), 0.97 (9H, s,  $\text{C}(\text{CH}_3)_3$ ), 2.29 (3H, s,  $\text{CH}_3$ ), 3.65 (1H, m,  $\text{OCH}_2\text{CH}_3$ ), 3.82 (1H, m,  $\text{OCH}_2\text{CH}_3$ ), 4.26 (1H, d,  $J=7.3$  Hz, H5), 4.99 (1H, s, H2), 5.26 (1H, d,  $J=7.3$  Hz, H4), 7.08 (2H, m, Ar-H), 7.14 (2H, m, Ar-H);  $\delta_{\text{C}}$  (Minor diastereomer) (101 MHz,  $\text{CDCl}_3$ ) 13.8 ( $\text{OCH}_2\text{CH}_3$ ), 21.2 ( $\text{CH}_3$ ), 25.2 ( $(\text{CH}_3)_3$ ), 36.5 ( $\text{C}(\text{CH}_3)_3$ ), 61.0 ( $\text{OCH}_2\text{CH}_3$ ), 65.6 (C5), 81.2 (C4), 101.4 (C2), 126.2 (Ar-C), 128.8 (Ar-C), 136.2 (Ar-C), 137.6 (Ar-C), 170.4 (C=O); LRMS (ESI<sup>+</sup>)  $m/z$ : 292.2 ( $[\text{M} + \text{H}]^+$  20%), 314.2 ( $[\text{M} + \text{Na}]^+$  20%); HRMS (ESI<sup>+</sup>)  $m/z$ :  $[\text{M} + \text{H}]^+$  calcd. for  $\text{C}_{17}\text{H}_{26}\text{NO}_3$ , 292.1907, found 292.1906.

#### Ethyl (4S\*,5S\*)-2-(tert-butyl)-5-(4-butylphenyl)oxazolidine-4-carboxylate 10c

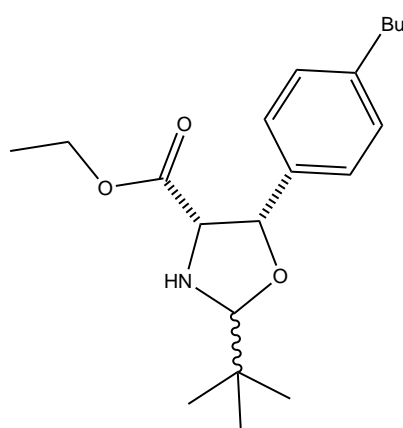

Method A: Yield (2.51 g, 90%); Yellow oil;  $\nu_{\max}/\text{cm}^{-1}$  2957 (C-H), 2931 (C-H), 2871 (C-H), 1735 (C=O); 5.3:1 mixture of diastereomers at the C2-position;

$\delta_{\text{H}}$  (Major diastereomer) (400 MHz,  $\text{CDCl}_3$ ) 0.75 (3H, t,  $J=7.1$  Hz,  $\text{OCH}_2\text{CH}_3$ ), 0.90 (3H, m,  $\text{CH}_3\text{CH}_2$ ), 1.14 (9H, s,  $\text{C}(\text{CH}_3)_3$ ), 1.31 (2H, m,  $\text{CH}_2\text{CH}_3$ ), 1.56 (2H, m,  $\text{CH}_2\text{CH}_2$ ), 2.56 (2H, t,  $J=7.6$  Hz,  $\text{CH}_2\text{CH}_2$ ), 3.07 (1H, br s, NH), 3.43 (1H, dq,  $J=7.2$  Hz, 10.7 Hz,  $\text{OCH}_2\text{CH}_3$ ), 3.69 (1H, dq,  $J=7.1$  Hz, 10.7 Hz,  $\text{OCH}_2\text{CH}_3$ ), 4.17 (1H, d,  $J=9.0$  Hz, H5), 4.21 (1H, s, H2), 5.04 (1H, d,  $J=9.0$  Hz, H4), 7.09 (2H,

d,  $J=8.1$  Hz, Ar-H), 7.17 (2H, d,  $J=8.1$  Hz, Ar-H);  $\delta_{\text{C}}$  (Major diastereomer) (101 MHz,  $\text{CDCl}_3$ ) 13.5 ( $\text{OCH}_2\text{CH}_3$ ), 14.0 ( $\text{CH}_3\text{CH}_2$ ), 22.3 ( $\text{CH}_2\text{CH}_3$ ), 25.7 ( $(\text{CH}_3)_3$ ), 33.4 ( $\text{C}(\text{CH}_3)_3$ ), 33.8 ( $\text{CH}_2\text{CH}_2$ ), 35.4 ( $\text{CH}_2\text{CH}_2$ ), 61.2 ( $\text{OCH}_2\text{CH}_3$ ), 65.4 (C5), 80.6 (C4), 98.7 (C2), 127.0 (Ar-C), 128.1 (Ar-C), 135.4 (Ar-C), 143.0 (Ar-C), 171.0 (C=O);  $\delta_{\text{H}}$  (Minor diastereomer) (400 MHz,  $\text{CDCl}_3$ ) 0.90 (6H, m,  $\text{CH}_3\text{CH}_2$ ,  $\text{OCH}_2\text{CH}_3$ ), 0.97 (9H, s,  $\text{C}(\text{CH}_3)_3$ ), 1.31 (2H, m,  $\text{CH}_2\text{CH}_3$ ), 1.56 (2H, m,  $\text{CH}_2\text{CH}_2$ ), 2.56 (2H, m,



CH<sub>2</sub>CH<sub>2</sub>), 3.07 (1H, br s, NH), 3.69 (1H, m, OCH<sub>2</sub>CH<sub>3</sub>), 3.79 (1H, m, OCH<sub>2</sub>CH<sub>3</sub>), 4.27 (1H, d, *J*=7.4 Hz, H5), 4.99 (1H, s, H2), 5.26 (1H, d, *J*=7.4 Hz, H4), 7.09 (2H, m, Ar-H), 7.17 (2H, m, Ar-H);  $\delta_{\text{C}}$  (Minor diastereomer) (101 MHz, CDCl<sub>3</sub>) 13.5 (OCH<sub>2</sub>CH<sub>3</sub>), 14.0 (CH<sub>3</sub>CH<sub>2</sub>), 22.4 (CH<sub>2</sub>CH<sub>3</sub>), 25.1 ((CH<sub>3</sub>)<sub>3</sub>), 33.5 (CH<sub>2</sub>CH<sub>2</sub>), 35.8 (CH<sub>2</sub>CH<sub>2</sub>), 36.5 (C(CH<sub>3</sub>)<sub>3</sub>), 60.9 (OCH<sub>2</sub>CH<sub>3</sub>), 65.6 (C5), 81.3 (C4), 101.3 (C2), 126.2 (Ar-C), 128.2 (Ar-C), 136.4 (Ar-C), 142.7 (Ar-C), 170.4 (C=O); LRMS (ESI<sup>+</sup>) *m/z*: 356.2 ([M + Na]<sup>+</sup> 9%); HRMS (ESI<sup>+</sup>) *m/z*: [M + H]<sup>+</sup> calcd. for C<sub>20</sub>H<sub>32</sub>NO<sub>3</sub>, 334.2377, found 334.2376.

#### Ethyl (4*S*\*,5*S*\*)-2-(*tert*-butyl)-5-(4-methoxyphenyl)oxazolidine-4-carboxylate 10d

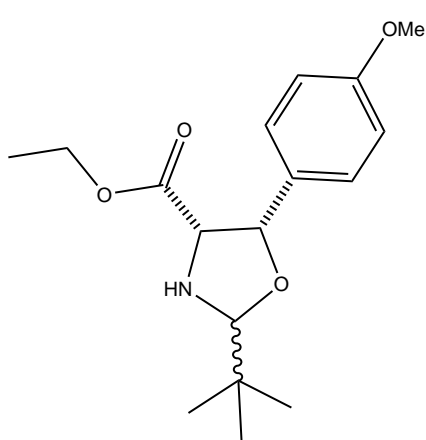

Method A: Yield (2.22 g, 97%); Orange oil;  $\nu_{\text{max}}$ /cm<sup>-1</sup> 3306 (N-H), 2958 (C-H), 2907 (C-H), 2872 (C-H), 1734 (C=O); 3.9:1 mixture of diastereomers at the C2-position;  $\delta_{\text{H}}$  (Major diastereomer) (400 MHz, CDCl<sub>3</sub>) 0.82 (3H, t, *J*=7.2 Hz, OCH<sub>2</sub>CH<sub>3</sub>), 1.14 (9H, s, C(CH<sub>3</sub>)<sub>3</sub>), 3.50 (1H, dq, *J*=7.2 Hz, 10.7 Hz, OCH<sub>2</sub>CH<sub>3</sub>), 3.72 (1H, m, OCH<sub>2</sub>CH<sub>3</sub>), 3.77 (3H, s, OCH<sub>3</sub>), 4.13 (1H, d, *J*=9.0 Hz, H5), 4.19 (1H, s, H2), 5.02 (1H, d, *J*=8.9 Hz, H4), 6.82 (2H, d, *J*=8.8 Hz, Ar-H), 7.19 (2H, d, *J*=8.7 Hz, Ar-H);  $\delta_{\text{C}}$  (Major diastereomer) (101 MHz, CDCl<sub>3</sub>) 13.7 (OCH<sub>2</sub>CH<sub>3</sub>),

25.7 ((CH<sub>3</sub>)<sub>3</sub>), 33.3 (C(CH<sub>3</sub>)<sub>3</sub>), 55.4 (OCH<sub>3</sub>), 61.1 (OCH<sub>2</sub>CH<sub>3</sub>), 65.6 (C5), 80.1 (C4), 98.8 (C2), 113.5 (Ar-C), 128.2 (Ar-C), 130.5 (Ar-C), 159.6 (Ar-C), 171.0 (C=O);  $\delta_{\text{H}}$  (Minor diastereomer) (400 MHz, CDCl<sub>3</sub>) 0.95 (3H, t, *J*=7.2 Hz, OCH<sub>2</sub>CH<sub>3</sub>), 0.98 (9H, s, C(CH<sub>3</sub>)<sub>3</sub>), 3.50 (1H, m, OCH<sub>2</sub>CH<sub>3</sub>), 3.72 (1H, m, OCH<sub>2</sub>CH<sub>3</sub>), 3.77 (3H, s, OCH<sub>3</sub>), 4.25 (1H, d, *J*=7.3 Hz, H5), 4.99 (1H, s, H2), 5.26 (1H, d, *J*=7.3 Hz, H4), 6.82 (2H, m, Ar-H), 7.13 (2H, d, *J*=8.6 Hz, Ar-H);  $\delta_{\text{C}}$  (Minor diastereomer) (101 MHz, CDCl<sub>3</sub>) 13.9 (OCH<sub>2</sub>CH<sub>3</sub>), 25.1 ((CH<sub>3</sub>)<sub>3</sub>), 36.5 (C(CH<sub>3</sub>)<sub>3</sub>), 55.3 (OCH<sub>3</sub>), 61.0 (OCH<sub>2</sub>CH<sub>3</sub>), 65.6 (C5), 81.0 (C4), 101.3 (C2), 113.5 (Ar-C), 127.5 (Ar-C), 131.3 (Ar-C), 159.4 (Ar-C), 170.4 (C=O); LRMS (ESI<sup>+</sup>) *m/z*: 330.2 ([M + Na]<sup>+</sup> 35%); HRMS (ESI<sup>+</sup>) *m/z*: [M + H]<sup>+</sup> calcd. for C<sub>17</sub>H<sub>26</sub>NO<sub>4</sub>, 308.1856, found 308.1855.

#### Ethyl (4*S*\*,5*S*\*)-2-(*tert*-butyl)-5-(4-fluorophenyl)oxazolidine-4-carboxylate 10e

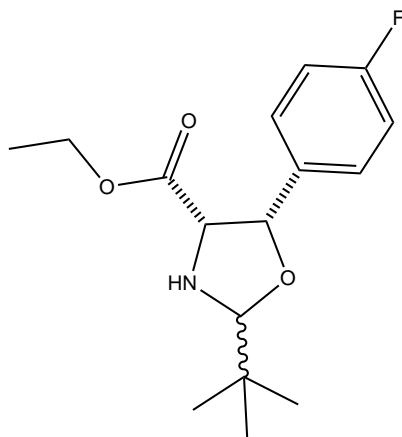

Method A: Yield (993 mg, 89%); Yellow oil;  $\nu_{\max}/\text{cm}^{-1}$  2979 (C-H), 2908 (C-H), 2874 (C-H), 1735 (C=O); 4.8:1 mixture of diastereomers at the C2-position;  $\delta_{\text{H}}$  (Major diastereomer) (400 MHz,  $\text{CDCl}_3$ ) 0.76 (3H, t,  $J=7.2$  Hz,  $\text{OCH}_2\text{CH}_3$ ), 1.07 (9H, s,  $\text{C}(\text{CH}_3)_3$ ), 2.81 (1H, br s, NH), 3.43 (1H, dq,  $J=7.1$  Hz, 10.7 Hz,  $\text{OCH}_2\text{CH}_3$ ), 3.68 (1H, dq,  $J=7.2$  Hz, 10.7 Hz,  $\text{OCH}_2\text{CH}_3$ ), 4.07 (1H, d,  $J=9.0$  Hz, H5), 4.13 (1H, s, H2), 4.97 (1H, d,  $J=9.0$  Hz, H4), 6.91 (2H, app t,  $J=8.6$  Hz, Ar-H), 7.18 (2H, dd,  $J=5.5$  Hz, 8.7 Hz, Ar-H);  $\delta_{\text{C}}$  (Major diastereomer) (101 MHz,  $\text{CDCl}_3$ ) 13.7 ( $\text{OCH}_2\text{CH}_3$ ), 25.7 ( $(\text{CH}_3)_3$ ), 33.4 ( $\text{C}(\text{CH}_3)_3$ ), 61.3 ( $\text{OCH}_2\text{CH}_3$ ), 65.6 (C5), 79.8 (C4), 99.1 (C2), 115.0 (d,  $J=21.5$  Hz, Ar-C), 128.7 (d,  $J=8.2$  Hz, Ar-C), 134.2 (d,  $J=3.1$  Hz, Ar-C), 162.7 (d,  $J=246.2$  Hz, Ar-C), 170.8 (C=O);  $\delta_{\text{F}}$  (Major diastereomer) (376 MHz,  $\text{CDCl}_3$ ) -114.17;  $\delta_{\text{H}}$  (Minor diastereomer) (400 MHz,  $\text{CDCl}_3$ ) 0.87 (3H, t,  $J=7.2$  Hz,  $\text{OCH}_2\text{CH}_3$ ), 0.91 (9H, s,  $\text{C}(\text{CH}_3)_3$ ), 2.81 (1H, br s, NH), 3.58 (1H, dq,  $J=7.1$  Hz, 10.8 Hz,  $\text{OCH}_2\text{CH}_3$ ), 3.76 (1H, m,  $\text{OCH}_2\text{CH}_3$ ), 4.21 (1H, d,  $J=7.4$  Hz, H5), 4.92 (1H, s, H2), 5.20 (1H, d,  $J=7.3$  Hz, H4), 6.91 (2H, m, Ar-H), 7.18 (2H, m, Ar-H);  $\delta_{\text{C}}$  (Minor diastereomer) (101 MHz,  $\text{CDCl}_3$ ) 13.9 ( $\text{OCH}_2\text{CH}_3$ ), 25.1 ( $(\text{CH}_3)_3$ ), 36.5 ( $\text{C}(\text{CH}_3)_3$ ), 61.1 ( $\text{OCH}_2\text{CH}_3$ ), 65.6 (C5), 80.7 (C4), 101.5 (C2), 115.1 (d,  $J=21.5$  Hz, Ar-C), 128.0 (d,  $J=8.1$  Hz, Ar-C), 135.1 (d,  $J=3.1$  Hz, Ar-C), 162.6 (d,  $J=246.4$ , Ar-C), 170.3 (C=O);  $\delta_{\text{F}}$  (Minor diastereomer) (376 MHz,  $\text{CDCl}_3$ ) -114.54; LRMS ( $\text{ESI}^+$ )  $m/z$ : 296.2 ( $[\text{M} + \text{H}]^+$  24%); HRMS ( $\text{ESI}^+$ )  $m/z$ :  $[\text{M} + \text{H}]^+$  calcd. for  $\text{C}_{16}\text{H}_{23}\text{NO}_3\text{F}$ , 296.1657, found 296.1656.

#### Ethyl (4*S*\*,5*S*\*)-2-(*tert*-butyl)-5-(4-chlorophenyl)oxazolidine-4-carboxylate 10f

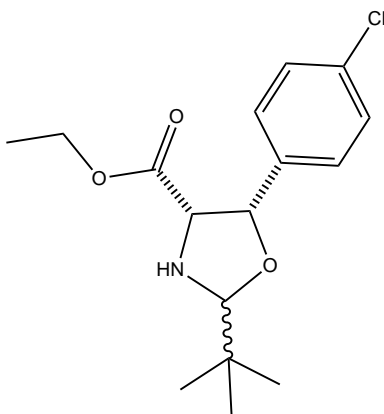

Method A: Yield (1.58 g, 74%); Orange oil;  $\nu_{\max}/\text{cm}^{-1}$  3306 (N-H), 2960 (C-H), 2907 (C-H), 2872 (C-H), 1735 (C=O); 5.6:1 mixture of diastereomers at the C2-position;  $\delta_{\text{H}}$  (Major diastereomer) (400 MHz,  $\text{CDCl}_3$ ) 0.84 (3H, t,  $J=7.2$  Hz,  $\text{OCH}_2\text{CH}_3$ ), 1.14 (9H, s,  $\text{C}(\text{CH}_3)_3$ ), 3.51 (1H, dq,  $J=7.2$  Hz, 10.7 Hz,  $\text{OCH}_2\text{CH}_3$ ), 3.76 (1H, dq,  $J=7.1$  Hz, 10.7 Hz,  $\text{OCH}_2\text{CH}_3$ ), 4.16 (1H, d,  $J=9.1$  Hz, H5), 4.21 (1H, s, H2), 5.03 (1H, d,  $J=9.1$  Hz, H4), 7.22 (2H, m, Ar-H), 7.27 (2H, m, Ar-H);  $\delta_{\text{C}}$  (Major diastereomer) (101 MHz,  $\text{CDCl}_3$ ) 13.7 ( $\text{OCH}_2\text{CH}_3$ ), 25.7 ( $(\text{CH}_3)_3$ ), 33.4 ( $\text{C}(\text{CH}_3)_3$ ), 61.4

( $\text{OCH}_2\text{CH}_3$ ), 65.6 (C5), 79.8 (C4), 99.2 (C2), 128.2 (Ar-C), 128.4 (Ar-C), 134.0 (Ar-C), 137.0 (Ar-C), 170.7 (C=O);  $\delta_{\text{H}}$  (Minor diastereomer) (400 MHz,  $\text{CDCl}_3$ ) 0.95 (3H, t,  $J=7.1$  Hz,  $\text{OCH}_2\text{CH}_3$ ), 0.98 (9H, s,  $\text{C}(\text{CH}_3)_3$ ), 3.43 (1H, dq,  $J=7.2$  Hz, 10.7

Hz, OCH<sub>2</sub>CH<sub>3</sub>), 3.68 (1H, m, OCH<sub>2</sub>CH<sub>3</sub>), 4.29 (1H, d, *J*=7.4 Hz, H5), 4.99 (1H, s, H2), 5.26 (1H, d, *J*=7.3 Hz, H4), 7.22 (2H, m, Ar-H), 7.27 (2H, m, Ar-H); δ<sub>C</sub> (Minor diastereomer) (101 MHz, CDCl<sub>3</sub>) 13.9 (OCH<sub>2</sub>CH<sub>3</sub>), 25.1 ((CH<sub>3</sub>)<sub>3</sub>), 36.5 (C(CH<sub>3</sub>)<sub>3</sub>), 61.2 (OCH<sub>2</sub>CH<sub>3</sub>), 65.6 (C5), 80.7 (C4), 101.6 (C2), 127.7 (Ar-C), 128.1 (Ar-C), 133.8 (Ar-C), 137.8 (Ar-C), 170.2 (C=O); LRMS (ESI<sup>+</sup>) *m/z*: 312.2 ([M<sup>35</sup> + H]<sup>+</sup> 34%); HRMS (ESI<sup>+</sup>) *m/z*: [M<sup>35</sup> + H]<sup>+</sup> calcd. for C<sub>16</sub>H<sub>23</sub>NO<sub>3</sub>Cl, 312.1361, found 312.1361; [M<sup>37</sup> + H]<sup>+</sup> calcd. for C<sub>16</sub>H<sub>23</sub>NO<sub>3</sub>Cl, 314.1332, found 314.1333.

### Ethyl (4*S*\*,5*S*\*)-5-(4-bromophenyl)-2-(*tert*-butyl)oxazolidine-4-carboxylate 10g

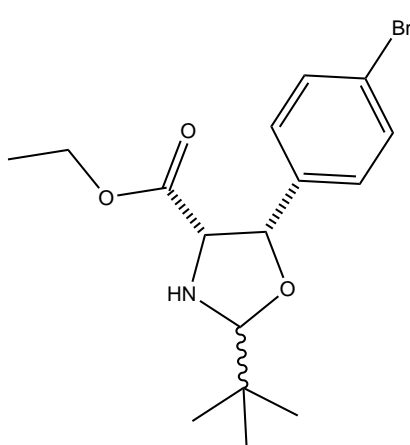

Method B: Yield (735 mg, 82%); Pale yellow oil; *v*<sub>max</sub>/cm<sup>-1</sup> 3309 (N-H), 2959 (C-H), 2907 (C-H), 2872 (C-H), 1736 (C=O); 5.7:1 mixture of diastereomers at the C2-position; δ<sub>H</sub> (Major diastereomer) (400 MHz, CDCl<sub>3</sub>) 0.84 (3H, t, *J*=7.2 Hz, OCH<sub>2</sub>CH<sub>3</sub>), 1.13 (9H, s, C(CH<sub>3</sub>)<sub>3</sub>), 2.80 (1H, br s, NH), 3.51 (1H, dq, *J*=7.2 Hz, 10.8 Hz, OCH<sub>2</sub>CH<sub>3</sub>), 3.75 (1H, dq, *J*=7.1 Hz, 10.8 Hz, OCH<sub>2</sub>CH<sub>3</sub>), 4.15 (1H, d, *J*=9.0 Hz, H5), 4.20 (1H, s, H2), 5.00 (1H, d, *J*=9.0 Hz, H4), 7.15 (2H, d, *J*=8.3 Hz, Ar-H), 7.41 (2H, d, *J*=8.5 Hz, Ar-H); δ<sub>C</sub> (Major diastereomer) (101 MHz, CDCl<sub>3</sub>)

13.7 (OCH<sub>2</sub>CH<sub>3</sub>), 25.7 ((CH<sub>3</sub>)<sub>3</sub>), 33.4 (C(CH<sub>3</sub>)<sub>3</sub>), 61.4 (OCH<sub>2</sub>CH<sub>3</sub>), 65.6 (C5), 79.9 (C4), 99.2 (C2), 122.1 (Ar-C), 128.8 (Ar-C), 131.2 (Ar-C), 137.5 (Ar-C), 170.7 (C=O); δ<sub>H</sub> (Minor diastereomer) (400 MHz, CDCl<sub>3</sub>) 0.95 (3H, t, *J*=7.2 Hz, OCH<sub>2</sub>CH<sub>3</sub>), 0.97 (9H, s, C(CH<sub>3</sub>)<sub>3</sub>), 2.80 (1H, br s, NH), 3.66 (1H, m, OCH<sub>2</sub>CH<sub>3</sub>), 3.84 (1H, dq, *J*=7.2 Hz, 10.8 Hz, OCH<sub>2</sub>CH<sub>3</sub>), 4.28 (1H, d, *J*=7.3 Hz, H5), 4.98 (1H, s, H2), 5.24 (1H, d, *J*=7.4 Hz, H4), 7.09 (2H, d, *J*=8.2 Hz, Ar-H), 7.41 (2H, m, Ar-H); δ<sub>C</sub> (Minor diastereomer) (101 MHz, CDCl<sub>3</sub>) 13.9 (OCH<sub>2</sub>CH<sub>3</sub>), 25.1 ((CH<sub>3</sub>)<sub>3</sub>), 36.5 (C(CH<sub>3</sub>)<sub>3</sub>), 61.2 (OCH<sub>2</sub>CH<sub>3</sub>), 65.6 (C5), 80.7 (C4), 101.6 (C2), 121.9 (Ar-C), 128.1 (Ar-C), 131.3 (Ar-C), 138.4 (Ar-C), 170.2 (C=O); LRMS (ESI<sup>+</sup>) *m/z*: 356.0 ([M<sup>79</sup> + H]<sup>+</sup> 46%), 358.0 ([M<sup>81</sup> + H]<sup>+</sup> 42%), 378.2 ([M<sup>79</sup> + Na]<sup>+</sup> 27%), 380.2 ([M<sup>81</sup> + Na]<sup>+</sup> 25%); HRMS (ESI<sup>+</sup>) *m/z*: [M<sup>79</sup> + H]<sup>+</sup> calcd. for C<sub>16</sub>H<sub>23</sub>NO<sub>3</sub>Br, 356.0856, found 356.0854; [M<sup>81</sup> + H]<sup>+</sup> calcd. for C<sub>16</sub>H<sub>23</sub>NO<sub>3</sub>Br, 358.0835, found 358.0833.

### Ethyl (4*S*\*,5*S*\*)-2-(*tert*-butyl)-5-(4-cyanophenyl)oxazolidine-4-carboxylate 10h

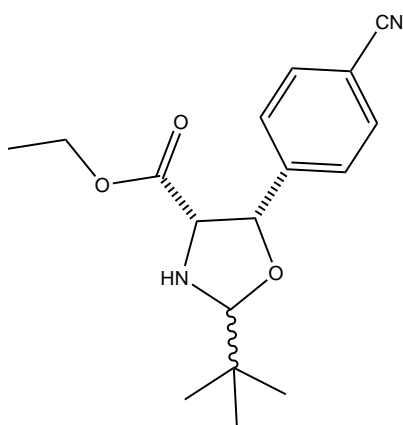

Method B: Yield (638 mg, 74%); Yellow oil;  $\nu_{\max}/\text{cm}^{-1}$  3308 (N-H), 2961 (C-H), 2907 (C-H), 2873 (C-H), 2229 (C≡N), 1734 (C=O); 4.6:1 mixture of diastereomers at the C2-position;  $\delta_{\text{H}}$  (Major diastereomer) (400 MHz, CDCl<sub>3</sub>) 0.82 (3H, t,  $J=7.2$  Hz, OCH<sub>2</sub>CH<sub>3</sub>), 1.13 (9H, s, C(CH<sub>3</sub>)<sub>3</sub>), 3.46 (1H, dq,  $J=7.2$  Hz, 10.8 Hz, OCH<sub>2</sub>CH<sub>3</sub>), 3.74 (1H, dq,  $J=7.2$  Hz, 10.8 Hz, OCH<sub>2</sub>CH<sub>3</sub>), 4.21 (1H, d,  $J=9.1$  Hz, H5), 4.23 (1H, s, H2), 5.07 (1H, d,  $J=9.0$  Hz, H4), 7.40 (2H, d,  $J=8.3$  Hz, Ar-H), 7.58 (2H, d,  $J=8.4$  Hz, Ar-H);  $\delta_{\text{C}}$  (Major diastereomer) (101 MHz, CDCl<sub>3</sub>) 13.7

(OCH<sub>2</sub>CH<sub>3</sub>), 25.7 ((CH<sub>3</sub>)<sub>3</sub>), 33.4 (C(CH<sub>3</sub>)<sub>3</sub>), 61.5 (OCH<sub>2</sub>CH<sub>3</sub>), 65.6 (C5), 79.7 (C4), 99.6 (C2), 112.0 (Ar-C), 118.7 (C≡N), 127.8 (Ar-C), 131.9 (Ar-C), 143.9 (Ar-C), 170.3 (C=O);  $\delta_{\text{H}}$  (Minor diastereomer) (400 MHz, CDCl<sub>3</sub>) 0.92 (3H, t,  $J=7.2$  Hz, OCH<sub>2</sub>CH<sub>3</sub>), 0.98 (9H, s, C(CH<sub>3</sub>)<sub>3</sub>), 3.62 (1H, dq,  $J=7.2$  Hz, 10.8 Hz, OCH<sub>2</sub>CH<sub>3</sub>), 3.82 (1H, m, OCH<sub>2</sub>CH<sub>3</sub>), 4.34 (1H, d,  $J=7.4$  Hz, H5), 5.01 (1H, s, H2), 5.29 (1H, d,  $J=7.4$  Hz, H4), 7.35 (2H, d,  $J=8.2$  Hz, Ar-H), 7.64 (2H, m, Ar-H);  $\delta_{\text{C}}$  (Minor diastereomer) (101 MHz, CDCl<sub>3</sub>) 13.9 (OCH<sub>2</sub>CH<sub>3</sub>), 25.1 ((CH<sub>3</sub>)<sub>3</sub>), 36.3 (C(CH<sub>3</sub>)<sub>3</sub>), 61.2 (OCH<sub>2</sub>CH<sub>3</sub>), 65.6 (C5), 80.6 (C4), 101.9 (C2), 111.8 (Ar-C), 118.7 (C≡N), 127.2 (Ar-C), 132.0 (Ar-C), 144.8 (Ar-C), 169.9 (C=O); LRMS (ESI<sup>+</sup>)  $m/z$ : 303.2 ([M + H]<sup>+</sup> 95%); HRMS (ESI<sup>+</sup>)  $m/z$ : [M + H]<sup>+</sup> calcd. for C<sub>17</sub>H<sub>23</sub>N<sub>2</sub>O<sub>3</sub> 303.1703, found 303.1703.

#### Ethyl (4S\*,5S\*)-2-(tert-butyl)-5-(4-(trifluoromethyl)phenyl)oxazolidine-4-carboxylate 10i

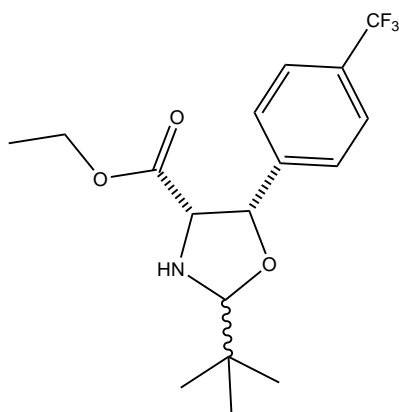

Method B: Yield (770 mg, 85%); Yellow oil;  $\nu_{\max}/\text{cm}^{-1}$  3309 (N-H), 2961 (C-H), 2909 (C-H), 2874 (C-H), 1736 (C=O); 5.3:1 mixture of diastereomers at the C2-position;  $\delta_{\text{H}}$  (Major diastereomer) (400 MHz, CDCl<sub>3</sub>) 0.76 (3H, t,  $J=7.2$  Hz, OCH<sub>2</sub>CH<sub>3</sub>), 1.15 (9H, s, C(CH<sub>3</sub>)<sub>3</sub>), 3.46 (1H, dq,  $J=7.2$  Hz, 10.8 Hz, OCH<sub>2</sub>CH<sub>3</sub>), 3.70 (1H, m, OCH<sub>2</sub>CH<sub>3</sub>), 4.20 (1H, d,  $J=9.0$  Hz, H5), 4.23 (1H, s, H2), 5.10 (1H, d,  $J=9.0$  Hz, H4), 7.40 (2H, d,  $J=8.5$  Hz, Ar-H), 7.56 (2H, d,  $J=8.2$  Hz, Ar-H);  $\delta_{\text{C}}$  (Major diastereomer) (101 MHz, CDCl<sub>3</sub>) 13.5 (OCH<sub>2</sub>CH<sub>3</sub>), 25.7 ((CH<sub>3</sub>)<sub>3</sub>), 33.4

(C(CH<sub>3</sub>)<sub>3</sub>), 61.4 (OCH<sub>2</sub>CH<sub>3</sub>), 65.6 (C5), 79.9 (C4), 99.4 (C2), 125.0 (q,  $J=3.7$  Hz, Ar-C), 127.5 (Ar-C), 130.5 (q,  $J=32.4$  Hz, Ar-C), 142.5 (Ar-C), 170.6 (C=O);  $\delta_{\text{F}}$  (Major diastereomer) (376 MHz, CDCl<sub>3</sub>) -62.70;  $\delta_{\text{H}}$  (Minor diastereomer) (400 MHz, CDCl<sub>3</sub>) 0.87 (3H, m, OCH<sub>2</sub>CH<sub>3</sub>), 0.99 (9H, s, C(CH<sub>3</sub>)<sub>3</sub>), 3.61 (1H, m, OCH<sub>2</sub>CH<sub>3</sub>), 3.79 (1H, m, OCH<sub>2</sub>CH<sub>3</sub>), 4.33 (1H, d,  $J=7.3$  Hz, H5), 5.02 (1H, s, H2), 5.32 (1H, d,  $J=7.4$  Hz, H4), 7.35 (2H, m, Ar-H), 7.47 (2H, m, Ar-H);  $\delta_{\text{C}}$  (Minor diastereomer) (101

MHz, CDCl<sub>3</sub>) 13.7 (OCH<sub>2</sub>CH<sub>3</sub>), 25.1 ((CH<sub>3</sub>)<sub>3</sub>), 36.4 (C(CH<sub>3</sub>)<sub>3</sub>), 61.2 (OCH<sub>2</sub>CH<sub>3</sub>), 65.7 (C5), 80.7 (C4), 101.8 (C2), 126.4 (Ar-C), 126.8 (Ar-C), 130.5 (Ar-C), 143.4 (Ar-C), 170.1 (C=O);  $\delta_F$  (Minor diastereomer) (376 MHz, CDCl<sub>3</sub>) -62.61; LRMS (ESI<sup>+</sup>) *m/z*: 346.2 ([M + H]<sup>+</sup> 82%), 368.2 ([M + Na]<sup>+</sup> 24%); HRMS (ESI<sup>+</sup>) *m/z*: [M + H]<sup>+</sup> calcd. for C<sub>17</sub>H<sub>23</sub>NO<sub>3</sub>F<sub>3</sub>, 346.1625, found 346.1623.

### Ethyl (4*S*\*,5*S*\*)-2-(*tert*-butyl)-5-(4-nitrophenyl)oxazolidine-4-carboxylate 10j

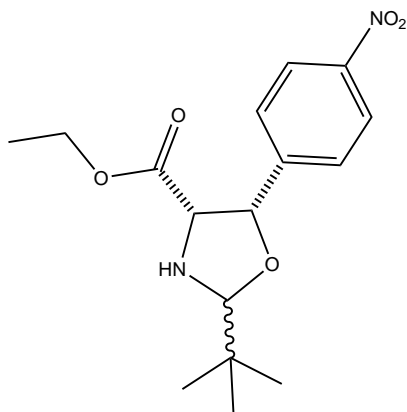

Method B: Yield (602 mg, 61%); Orange oil;  $\nu_{\max}/\text{cm}^{-1}$  3305 (N-H), 2961 (C-H), 2908 (C-H), 2873 (C-H), 1736 (C=O), 1523 (N-O); 4.6:1 mixture of diastereomers at the C2-position;  $\delta_H$  (Major diastereomer) (400 MHz, CDCl<sub>3</sub>) 0.83 (3H, t, *J*=7.1 Hz, OCH<sub>2</sub>CH<sub>3</sub>), 1.15 (9H, s, C(CH<sub>3</sub>)<sub>3</sub>), 3.47 (1H, dq, *J*=7.2 Hz, 10.8 Hz, OCH<sub>2</sub>CH<sub>3</sub>), 3.75 (1H, dq, *J*=7.2 Hz, 10.8 Hz, OCH<sub>2</sub>CH<sub>3</sub>), 4.24 (1H, d, *J*=9.1 Hz, H5), 4.25 (1H, s, H2), 5.13 (1H, d, *J*=9.1 Hz, H4), 7.46 (2H, d, *J*=8.6 Hz, Ar-H), 8.16 (2H, d, *J*=8.8 Hz, Ar-H);  $\delta_C$  (Major diastereomer) (101 MHz, CDCl<sub>3</sub>) 13.7

(OCH<sub>2</sub>CH<sub>3</sub>), 25.7 ((CH<sub>3</sub>)<sub>3</sub>), 33.4 (C(CH<sub>3</sub>)<sub>3</sub>), 61.5 (OCH<sub>2</sub>CH<sub>3</sub>), 65.7 (C5), 79.5 (C4), 99.7 (C2), 123.3 (Ar-C), 127.9 (Ar-C), 145.9 (Ar-C), 147.8 (Ar-C), 170.3 (C=O);  $\delta_H$  (Minor diastereomer) (400 MHz, CDCl<sub>3</sub>) 0.94 (3H, t, *J*=7.2 Hz, OCH<sub>2</sub>CH<sub>3</sub>), 0.99 (9H, s, C(CH<sub>3</sub>)<sub>3</sub>), 3.64 (1H, dq, *J*=7.2 Hz, 10.9 Hz, OCH<sub>2</sub>CH<sub>3</sub>), 3.84 (1H, m, OCH<sub>2</sub>CH<sub>3</sub>), 4.37 (1H, d, *J*=7.4 Hz, H5), 5.03 (1H, s, H2), 5.35 (1H, d, *J*=7.4 Hz, H4), 7.41 (2H, d, *J*=8.4 Hz, Ar-H), 8.16 (2H, m, Ar-H);  $\delta_C$  (Minor diastereomer) (101 MHz, CDCl<sub>3</sub>) 13.9 (OCH<sub>2</sub>CH<sub>3</sub>), 25.1 ((CH<sub>3</sub>)<sub>3</sub>), 36.4 (C(CH<sub>3</sub>)<sub>3</sub>), 61.3 (OCH<sub>2</sub>CH<sub>3</sub>), 65.7 (C5), 80.4 (C4), 102.0 (C2), 123.4 (Ar-C), 127.3 (Ar-C), 146.8 (Ar-C), 147.7 (Ar-C), 169.9 (C=O); LRMS (ESI<sup>+</sup>) *m/z*: 323.2 ([M + H]<sup>+</sup> 100%); HRMS (ESI<sup>+</sup>) *m/z*: [M + H]<sup>+</sup> calcd. for C<sub>16</sub>H<sub>23</sub>N<sub>2</sub>O<sub>5</sub>, 323.1601, found 323.1600.

### Ethyl (4*S*\*,5*S*\*)-2-(*tert*-butyl)-5-(3-methoxyphenyl)oxazolidine-4-carboxylate 10k

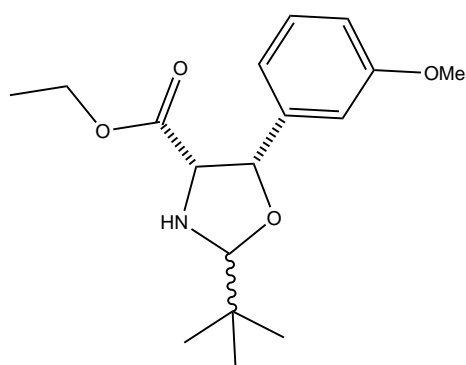

Method B: Yield (568 mg, 60%); Yellow oil;  $\nu_{\max}/\text{cm}^{-1}$  3307 (N-H), 2958 (C-H), 2907 (C-H), 2872 (C-H), 1735 (C=O); 5.7:1 mixture of diastereomers at the C2-position;  $\delta_H$  (Major diastereomer) (400 MHz, CDCl<sub>3</sub>) 0.81 (3H, t, *J*=7.2 Hz, OCH<sub>2</sub>CH<sub>3</sub>), 1.14 (9H, s, C(CH<sub>3</sub>)<sub>3</sub>), 2.76 (1H, br s, NH), 3.50 (1H, dq, *J*=7.1 Hz, 10.8 Hz, OCH<sub>2</sub>CH<sub>3</sub>), 3.72 (1H, m, OCH<sub>2</sub>CH<sub>3</sub>),

3.77 (3H, s, OCH<sub>3</sub>), 4.15 (1H, d, *J*=9.0 Hz, H<sub>5</sub>), 4.20 (1H, s, H<sub>2</sub>), 5.02 (1H, d, *J*=9.0 Hz, H<sub>4</sub>), 6.78 (1H, m, Ar-H), 6.84 (2H, m, Ar-H), 7.18 (1H, m, Ar-H);  $\delta_{\text{C}}$  (Major diastereomer) (101 MHz, CDCl<sub>3</sub>) 13.6 (OCH<sub>2</sub>CH<sub>3</sub>), 25.8 ((CH<sub>3</sub>)<sub>3</sub>), 33.4 (C(CH<sub>3</sub>)<sub>3</sub>), 55.3 (OCH<sub>3</sub>), 61.2 (OCH<sub>2</sub>CH<sub>3</sub>), 65.7 (C<sub>5</sub>), 80.4 (C<sub>4</sub>), 99.1 (C<sub>2</sub>), 112.4 (Ar-C), 114.0 (Ar-C), 119.5 (Ar-C), 129.1 (Ar-C), 140.0 (Ar-C), 159.5 (Ar-C), 170.8 (C=O);  $\delta_{\text{H}}$  (Minor diastereomer) (400 MHz, CDCl<sub>3</sub>) 0.94 (3H, t, *J*=7.1 Hz, OCH<sub>2</sub>CH<sub>3</sub>), 0.97 (9H, s, C(CH<sub>3</sub>)<sub>3</sub>), 2.76 (1H, br s, NH), 3.72 (1H, m, OCH<sub>2</sub>CH<sub>3</sub>), 3.77 (3H, s, OCH<sub>3</sub>), 3.80 (1H, m, OCH<sub>2</sub>CH<sub>3</sub>), 4.27 (1H, d, *J*=7.3 Hz, H<sub>5</sub>), 4.99 (1H, s, H<sub>2</sub>), 5.26 (1H, d, *J*=7.3 Hz, H<sub>4</sub>), 6.78 (1H, m, Ar-H), 6.84 (2H, m, Ar-H), 7.18 (1H, m, Ar-H);  $\delta_{\text{C}}$  (Minor diastereomer) (101 MHz, CDCl<sub>3</sub>) 13.8 (OCH<sub>2</sub>CH<sub>3</sub>), 25.2 ((CH<sub>3</sub>)<sub>3</sub>), 36.5 (C(CH<sub>3</sub>)<sub>3</sub>), 55.3 (OCH<sub>3</sub>), 61.0 (OCH<sub>2</sub>CH<sub>3</sub>), 65.6 (C<sub>5</sub>), 81.2 (C<sub>4</sub>), 101.5 (C<sub>2</sub>), 112.1 (Ar-C), 113.3 (Ar-C), 118.7 (Ar-C), 129.2 (Ar-C), 140.9 (Ar-C), 159.6 (Ar-C), 170.3 (C=O); LRMS (ESI<sup>+</sup>) *m/z*: 308.2 ([M + H]<sup>+</sup> 57%), 330.2 ([M + Na]<sup>+</sup> 75%); HRMS (ESI<sup>+</sup>) *m/z*: [M + H]<sup>+</sup> calcd. for C<sub>17</sub>H<sub>26</sub>NO<sub>4</sub>, 308.1856, found 308.1856.

#### Ethyl (4*S*\*,5*S*\*)-2-(*tert*-butyl)-5-(3-chlorophenyl)oxazolidine-4-carboxylate **10l**

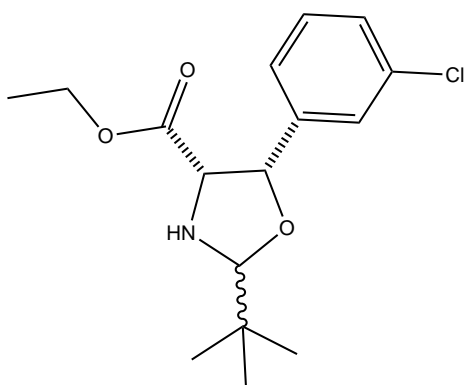

Method B: Yield (689 mg, 78%); Pale yellow oil;  $\nu_{\text{max}}$ /cm<sup>-1</sup> 3308 (N-H), 2960 (C-H), 2907 (C-H), 2873 (C-H), 1736 (C=O); 4.6:1 mixture of diastereomers at the C2-position;  $\delta_{\text{H}}$  (Major diastereomer) (400 MHz, CDCl<sub>3</sub>) 0.79 (3H, t, *J*=7.1 Hz, OCH<sub>2</sub>CH<sub>3</sub>), 1.07 (9H, s, C(CH<sub>3</sub>)<sub>3</sub>), 2.71 (1H, br s, NH), 3.46 (1H, dq, *J*=7.2 Hz, 10.7 Hz, OCH<sub>2</sub>CH<sub>3</sub>), 3.69 (1H, dq, *J*=7.1 Hz, 10.8 Hz, OCH<sub>2</sub>CH<sub>3</sub>), 4.09 (1H, d, *J*=9.1 Hz, H<sub>5</sub>), 4.13 (1H, s, H<sub>2</sub>), 4.94

(1H, d, *J*=9.1 Hz, H<sub>4</sub>), 7.08-7.24 (4H, m, Ar-H);  $\delta_{\text{C}}$  (Major diastereomer) (101 MHz, CDCl<sub>3</sub>) 13.6 (OCH<sub>2</sub>CH<sub>3</sub>), 25.8 ((CH<sub>3</sub>)<sub>3</sub>), 33.4 (C(CH<sub>3</sub>)<sub>3</sub>), 61.4 (OCH<sub>2</sub>CH<sub>3</sub>), 65.7 (C<sub>5</sub>), 79.7 (C<sub>4</sub>), 99.4 (C<sub>2</sub>), 125.1 (Ar-C), 127.3 (Ar-C), 128.3 (Ar-C), 129.4 (Ar-C), 134.0 (Ar-C), 140.6 (Ar-C), 170.6 (C=O);  $\delta_{\text{H}}$  (Minor diastereomer) (400 MHz, CDCl<sub>3</sub>) 0.90 (3H, t, *J*=7.1 Hz, OCH<sub>2</sub>CH<sub>3</sub>), 0.91 (9H, s, C(CH<sub>3</sub>)<sub>3</sub>), 2.71 (1H, br s, NH), 3.63 (1H, m, OCH<sub>2</sub>CH<sub>3</sub>), 3.78 (1H, dq, *J*=7.2 Hz, 10.8 Hz, OCH<sub>2</sub>CH<sub>3</sub>), 4.22 (1H, d, *J*=7.4 Hz, H<sub>5</sub>), 4.94 (1H, s, H<sub>2</sub>), 5.18 (1H, d, *J*=7.3 Hz, H<sub>4</sub>), 7.08-7.24 (4H, m, Ar-H);  $\delta_{\text{C}}$  (Minor diastereomer) (101 MHz, CDCl<sub>3</sub>) 13.8 (OCH<sub>2</sub>CH<sub>3</sub>), 25.2 ((CH<sub>3</sub>)<sub>3</sub>), 36.5 (C(CH<sub>3</sub>)<sub>3</sub>), 61.2 (OCH<sub>2</sub>CH<sub>3</sub>), 65.6 (C<sub>5</sub>), 80.6 (C<sub>4</sub>), 101.7 (C<sub>2</sub>), 124.5 (Ar-C), 126.5 (Ar-C), 128.1 (Ar-C), 129.5 (Ar-C), 134.2 (Ar-C), 141.4 (Ar-C), 170.1 (C=O); LRMS (ESI<sup>+</sup>) *m/z*: 312.0 ([M<sup>35</sup> + H]<sup>+</sup> 97%), 314.2 ([M<sup>37</sup> + H]<sup>+</sup> 28%); HRMS (ESI<sup>+</sup>) *m/z*: [M<sup>35</sup> + H]<sup>+</sup> calcd. for C<sub>16</sub>H<sub>23</sub>NO<sub>3</sub>Cl, 312.1361, found 312.1362; [M<sup>37</sup> + H]<sup>+</sup> calcd. for C<sub>16</sub>H<sub>23</sub>NO<sub>3</sub>Cl, 314.1332, found 314.1334.

### Ethyl (4*S*\*,5*S*\*)-5-(3-bromophenyl)-2-(*tert*-butyl)oxazolidine-4-carboxylate 10m

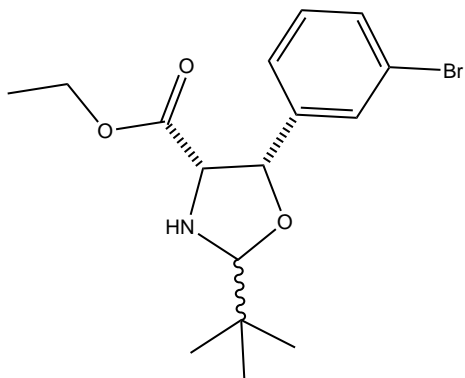

Method B: Yield (797 mg, 80%); Yellow oil;  $\nu_{\max}/\text{cm}^{-1}$  3307 (N-H), 2959 (C-H), 2906 (C-H), 2872 (C-H), 1734 (C=O); 3.8:1 mixture of diastereomers at the C2-position;  $\delta_{\text{H}}$  (Major diastereomer) (400 MHz,  $\text{CDCl}_3$ ) 0.80 (3H, t,  $J=7.2$  Hz,  $\text{OCH}_2\text{CH}_3$ ), 1.07 (9H, s,  $\text{C}(\text{CH}_3)_3$ ), 2.81 (1H, br s, NH), 3.47 (1H, dq,  $J=7.2$  Hz, 10.8 Hz,  $\text{OCH}_2\text{CH}_3$ ), 3.69 (1H, dq,  $J=7.2$  Hz, 10.8 Hz,  $\text{OCH}_2\text{CH}_3$ ), 4.08 (1H, d,  $J=8.9$  Hz, H5), 4.13 (1H, s, H2), 4.93 (1H, d,  $J=8.9$  Hz, H4), 7.07-7.43 (4H, m, Ar-H);  $\delta_{\text{C}}$  (Major diastereomer) (101 MHz,  $\text{CDCl}_3$ ) 13.7 ( $\text{OCH}_2\text{CH}_3$ ), 25.8 ( $(\text{CH}_3)_3$ ), 33.4 ( $\text{C}(\text{CH}_3)_3$ ), 61.4 ( $\text{OCH}_2\text{CH}_3$ ), 65.7 (C5), 79.7 (C4), 99.4 (C2), 122.1 (Ar-C), 125.6 (Ar-C), 129.7 (Ar-C), 130.2 (Ar-C), 131.2 (Ar-C), 140.9 (Ar-C), 170.5 (C=O);  $\delta_{\text{H}}$  (Minor diastereomer) (400 MHz,  $\text{CDCl}_3$ ) 0.90 (3H, m,  $\text{OCH}_2\text{CH}_3$ ), 0.91 (9H, s,  $\text{C}(\text{CH}_3)_3$ ), 2.81 (1H, br s, NH), 3.58 (1H, m,  $\text{OCH}_2\text{CH}_3$ ), 3.78 (1H, dq,  $J=7.2$  Hz, 10.8 Hz,  $\text{OCH}_2\text{CH}_3$ ), 4.22 (1H, d,  $J=7.4$  Hz, H5), 4.92 (1H, s, H2), 5.17 (1H, d,  $J=7.3$  Hz, H4), 7.07-7.43 (4H, m, Ar-H);  $\delta_{\text{C}}$  (Minor diastereomer) (101 MHz,  $\text{CDCl}_3$ ) 13.9 ( $\text{OCH}_2\text{CH}_3$ ), 25.2 ( $(\text{CH}_3)_3$ ), 36.5 ( $\text{C}(\text{CH}_3)_3$ ), 61.3 ( $\text{OCH}_2\text{CH}_3$ ), 65.7 (C5), 80.5 (C4), 101.7 (C2), 122.1-141.7 (Ar-C), 170.1 (C=O); LRMS (ESI<sup>+</sup>)  $m/z$ : 356.0 ( $[\text{M}^{79} + \text{H}]^+$  83%), 358.0 ( $[\text{M}^{81} + \text{H}]^+$  77%), 378.0 ( $[\text{M}^{79} + \text{Na}]^+$  69%), 380.0 ( $[\text{M}^{81} + \text{Na}]^+$  69%); HRMS (ESI<sup>+</sup>)  $m/z$ :  $[\text{M}^{79} + \text{H}]^+$  calcd. for  $\text{C}_{16}\text{H}_{23}\text{NO}_3\text{Br}$ , 356.0856, found 356.0860;  $[\text{M}^{81} + \text{H}]^+$  calcd. for  $\text{C}_{16}\text{H}_{23}\text{NO}_3\text{Br}$ , 358.0836, found 358.0839.

### Ethyl (4*S*\*,5*S*\*)-2-(*tert*-butyl)-5-(2-fluorophenyl)oxazolidine-4-carboxylate 10n

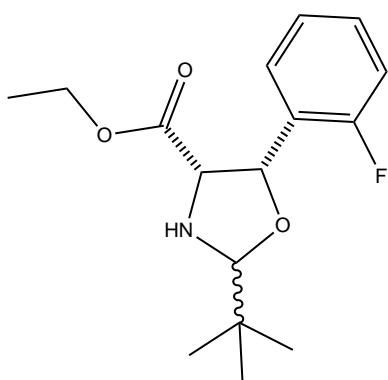

Method B: Yield (648 mg, 78%); Yellow oil;  $\nu_{\max}/\text{cm}^{-1}$  3307 (N-H), 2960 (C-H), 2907 (C-H), 2873 (C-H), 1735 (C=O); 4.9:1 mixture of diastereomers at the C2-position;  $\delta_{\text{H}}$  (Major diastereomer) (400 MHz,  $\text{CDCl}_3$ ) 0.82 (3H, t,  $J=7.1$  Hz,  $\text{OCH}_2\text{CH}_3$ ), 1.14 (9H, s,  $\text{C}(\text{CH}_3)_3$ ), 3.47 (1H, dq,  $J=7.1$  Hz, 10.7 Hz,  $\text{OCH}_2\text{CH}_3$ ), 3.74 (1H, m,  $\text{OCH}_2\text{CH}_3$ ), 4.22 (1H, d,  $J=8.9$  Hz, H5), 4.22 (1H, s, H2), 5.39 (1H, d,  $J=8.9$  Hz, H4), 6.99 (1H, m, Ar-H), 7.08 (1H, m, Ar-H), 7.22 (1H, m, Ar-H), 7.36 (1H, m, Ar-H);  $\delta_{\text{C}}$  (Major diastereomer) (101 MHz,  $\text{CDCl}_3$ ) 13.6 ( $\text{OCH}_2\text{CH}_3$ ), 25.7 ( $(\text{CH}_3)_3$ ), 33.4 ( $\text{C}(\text{CH}_3)_3$ ), 61.3 ( $\text{OCH}_2\text{CH}_3$ ), 64.5 (C5), 73.8 (d,  $J=4.5$  Hz, C4), 99.0 (C2), 114.8 (d,  $J=21.3$  Hz, Ar-C), 124.1 (d,  $J=3.4$  Hz, Ar-C), 125.7

(d,  $J=12.6$  Hz, Ar-C), 127.8 (d,  $J=3.7$  Hz, Ar-C), 129.4 (d,  $J=8.2$  Hz, Ar-C), 160.4 (d,  $J=247.4$  Hz, Ar-C), 171.1 (C=O);  $\delta_F$  (Major diastereomer) (376 MHz, CDCl<sub>3</sub>) -118.03;  $\delta_H$  (Minor diastereomer) (400 MHz, CDCl<sub>3</sub>) 0.87 (3H, t,  $J=7.2$  Hz, OCH<sub>2</sub>CH<sub>3</sub>), 0.99 (9H, s, C(CH<sub>3</sub>)<sub>3</sub>), 3.62 (1H, m, OCH<sub>2</sub>CH<sub>3</sub>), 3.78 (1H, m, OCH<sub>2</sub>CH<sub>3</sub>), 4.39 (1H, d,  $J=7.2$  Hz, H5), 4.99 (1H, s, H2), 5.51 (1H, d,  $J=7.2$  Hz, H4), 6.99 (1H, m, Ar-H), 7.08 (1H, m, Ar-H), 7.22 (1H, m, Ar-H), 7.36 (1H, m, Ar-H);  $\delta_C$  (Minor diastereomer) (101 MHz, CDCl<sub>3</sub>) 13.7 (OCH<sub>2</sub>CH<sub>3</sub>), 25.1 ((CH<sub>3</sub>)<sub>3</sub>), 36.0 (C(CH<sub>3</sub>)<sub>3</sub>), 61.0 (OCH<sub>2</sub>CH<sub>3</sub>), 64.8 (C5), 75.4 (d,  $J=4.1$  Hz, C4), 101.1 (C2), 114.8 (d,  $J=21.5$  Hz, Ar-C), 124.1 (Ar-C), 125.7 (Ar-C), 127.8 (Ar-C), 129.4 (Ar-C), 160.1 (d,  $J=246.2$  Hz, Ar-C), 170.7 (C=O);  $\delta_F$  (Minor diastereomer) (376 MHz, CDCl<sub>3</sub>) -117.59; LRMS (ESI<sup>+</sup>)  $m/z$ : 296.1 ([M + H]<sup>+</sup> 98%), 318.1 ([M + Na]<sup>+</sup> 33%); HRMS (ESI<sup>+</sup>)  $m/z$ : [M + H]<sup>+</sup> calcd. for C<sub>16</sub>H<sub>23</sub>NO<sub>3</sub>F, 296.1656, found 296.1655.

### Ethyl (4*S*\*,5*S*\*)-5-(2-bromophenyl)-2-(*tert*-butyl)oxazolidine-4-carboxylate **10o**

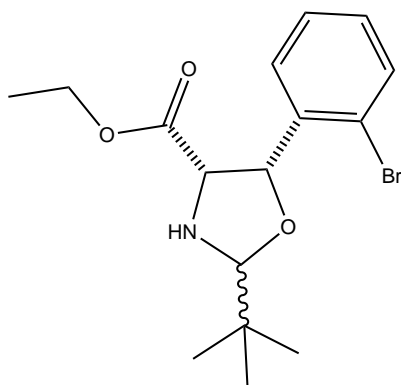

Method B: Yield (993 mg, 77%); Yellow oil;  $\nu_{\max}/\text{cm}^{-1}$  3305 (N-H), 2959 (C-H), 2906 (C-H), 2872 (C-H), 1733 (C=O); 5.7:1 mixture of diastereomers at the C2-position;  $\delta_H$  (Major diastereomer) (400 MHz, CDCl<sub>3</sub>) 0.80 (3H, t,  $J=7.2$  Hz, OCH<sub>2</sub>CH<sub>3</sub>), 1.15 (9H, s, C(CH<sub>3</sub>)<sub>3</sub>), 3.24 (1H, br s, NH), 3.43 (1H, dq,  $J=7.2$  Hz, 10.7 Hz, OCH<sub>2</sub>CH<sub>3</sub>), 3.71 (1H, dq,  $J=7.2$  Hz, 10.6 Hz, OCH<sub>2</sub>CH<sub>3</sub>), 4.22 (1H, s, H2), 4.28 (1H, d,  $J=8.7$  Hz, H5), 5.43 (1H, d,  $J=8.6$  Hz, H4), 7.11 (1H, m, Ar-H), 7.25 (1H, m, Ar-H), 7.39 (1H, m, Ar-H), 7.49 (1H, m, Ar-H);  $\delta_C$  (Major diastereomer) (101 MHz, CDCl<sub>3</sub>) 13.5 (OCH<sub>2</sub>CH<sub>3</sub>), 25.8 ((CH<sub>3</sub>)<sub>3</sub>), 33.5 (C(CH<sub>3</sub>)<sub>3</sub>), 61.4 (OCH<sub>2</sub>CH<sub>3</sub>), 63.7 (C5), 79.5 (C4), 99.0 (C2), 123.3 (Ar-C), 127.4 (Ar-C), 128.0 (Ar-C), 129.3 (Ar-C), 132.2 (Ar-C), 137.6 (Ar-C), 171.3 (C=O);  $\delta_H$  (Minor diastereomer) (400 MHz, CDCl<sub>3</sub>) 1.02 (9H, s, C(CH<sub>3</sub>)<sub>3</sub>), 1.06 (3H, t,  $J=7.1$  Hz, OCH<sub>2</sub>CH<sub>3</sub>), 3.24 (1H, br s, NH), 3.54 (1H, m, OCH<sub>2</sub>CH<sub>3</sub>), 3.71 (1H, m, OCH<sub>2</sub>CH<sub>3</sub>), 4.56 (1H, d,  $J=7.0$  Hz, H5), 5.04 (1H, s, H2), 5.46 (1H, d,  $J=7.1$  Hz, H4), 7.11 (1H, m, Ar-H), 7.25 (1H, m, Ar-H), 7.39 (1H, m, Ar-H), 7.49 (1H, m, Ar-H);  $\delta_C$  (Minor diastereomer) (101 MHz, CDCl<sub>3</sub>) 13.6 (OCH<sub>2</sub>CH<sub>3</sub>), 25.1 ((CH<sub>3</sub>)<sub>3</sub>), 35.4 (C(CH<sub>3</sub>)<sub>3</sub>), 60.8 (OCH<sub>2</sub>CH<sub>3</sub>), 64.1 (C5), 80.6 (C4), 101.0 (C2), 122.7 (Ar-C), 127.5 (Ar-C), 128.2 (Ar-C), 129.2 (Ar-C), 132.2 (Ar-C), 138.1 (Ar-C), 170.8 (C=O); LRMS (ESI<sup>+</sup>)  $m/z$ : 356.0 ([M<sup>79</sup> + H]<sup>+</sup> 7%), 358.0 ([M<sup>81</sup> + H]<sup>+</sup> 7%); HRMS (ESI<sup>+</sup>)  $m/z$ : [M<sup>79</sup> + H]<sup>+</sup> calcd. for C<sub>16</sub>H<sub>23</sub>NO<sub>3</sub>Br, 356.0856, found 356.0858; [M<sup>81</sup> + H]<sup>+</sup> calcd. for C<sub>16</sub>H<sub>23</sub>NO<sub>3</sub>Br, 358.0835, found 358.0838.



### Ethyl (4*S*\*,5*S*\*)-2-(*tert*-butyl)-5-(pyridin-3-yl)oxazolidine-4-carboxylate **10p**

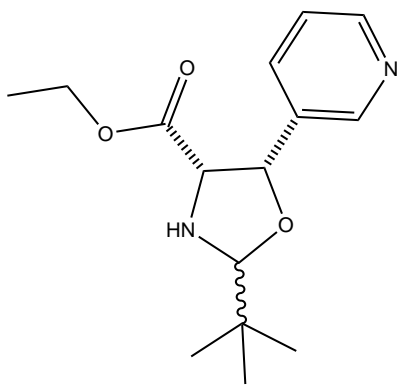

Method B: Yield (1.11 g, 57%); Yellow oil;  $\nu_{\max}/\text{cm}^{-1}$  3306 (N-H), 2959 (C-H), 2907 (C-H), 2873 (C-H), 1734 (C=O); 4.9:1 mixture of diastereomers at the C2-position;  $\delta_{\text{H}}$  (Major diastereomer) (400 MHz,  $\text{CDCl}_3$ ) 0.80 (3H, t,  $J=7.1$  Hz,  $\text{OCH}_2\text{CH}_3$ ), 1.13 (9H, s,  $\text{C}(\text{CH}_3)_3$ ), 3.05 (1H, br s, NH), 3.50 (1H, dq,  $J=7.2$  Hz, 10.8 Hz,  $\text{OCH}_2\text{CH}_3$ ), 3.73 (1H, dq,  $J=7.0$  Hz, 10.7 Hz,  $\text{OCH}_2\text{CH}_3$ ), 4.19 (1H, d,  $J=9.0$  Hz, H5), 4.22 (1H, s, H2), 5.07 (1H, d,  $J=9.0$  Hz, H4), 7.22 (1H, m, Ar-H),

7.30 (1H, m, Ar-H), 7.60 (1H, m, Ar-H), 8.52 (1H, m, Ar-H);  $\delta_{\text{C}}$  (Major diastereomer) (101 MHz,  $\text{CDCl}_3$ ) 13.7 ( $\text{OCH}_2\text{CH}_3$ ), 25.7 ( $(\text{CH}_3)_3$ ), 33.4 ( $\text{C}(\text{CH}_3)_3$ ), 61.4 ( $\text{OCH}_2\text{CH}_3$ ), 65.7 (C5), 78.1 (C4), 99.5 (C2), 123.2 (Ar-C), 134.3 (Ar-C), 134.5 (Ar-C), 148.8 (Ar-C), 149.5 (Ar-C), 170.5 (C=O);  $\delta_{\text{H}}$  (Minor diastereomer) (400 MHz,  $\text{CDCl}_3$ ) 0.91 (3H, t,  $J=7.2$  Hz,  $\text{OCH}_2\text{CH}_3$ ), 0.97 (9H, s,  $\text{C}(\text{CH}_3)_3$ ), 3.05 (1H, br s, NH), 3.65 (1H, m,  $\text{OCH}_2\text{CH}_3$ ), 3.81 (1H, m,  $\text{OCH}_2\text{CH}_3$ ), 4.33 (1H, d,  $J=7.4$  Hz, H5), 4.99 (1H, s, H2), 5.30 (1H, d,  $J=7.6$  Hz, H4), 7.10-8.52 (4H, m, Ar-H); LRMS (ESI<sup>+</sup>)  $m/z$ : 279.2 ( $[\text{M} + \text{H}]^+$  96%), 301.2 ( $[\text{M} + \text{Na}]^+$  78%); HRMS (ESI<sup>+</sup>)  $m/z$ :  $[\text{M} + \text{H}]^+$  calcd. for  $\text{C}_{15}\text{H}_{23}\text{N}_2\text{O}_3$ , 279.1703, found 279.1704.

### General procedure for the synthesis of malonamides **11**:<sup>14</sup>

To a stirring solution of oxazolidine **10a-p** (1.0 eq.) in anhydrous DCM at 0°C was added ethyl malonyl chloride (1.1 eq.) and pyridine (1.2 eq.) dropwise. The mixture was stirred at 0°C for 10-20 min and then refluxed overnight. The mixture was then left to cool to rt, washed with sat.  $\text{NH}_4\text{Cl}$  (aq.), sat.  $\text{NaHCO}_3$  (aq.), brine, dried over  $\text{Na}_2\text{SO}_4$ , filtered, concentrated under reduced pressure and purified by flash column chromatography to give *N*-acylated oxazolidines **11a-p**.

### Ethyl (2*R*\*,4*S*\*,5*S*\*)-2-(*tert*-butyl)-3-(3-ethoxy-3-oxopropanoyl)-5-phenyloxazolidine-4-carboxylate **11a**

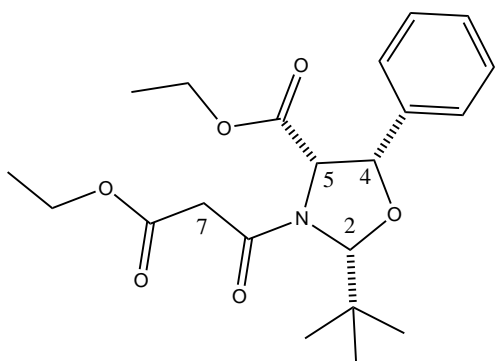

Yield (2.95 g, 80%); Yellow oil;  $R_f$  (30% EtOAc in Pet. Ether 40:60) 0.58;  $\nu_{\max}/\text{cm}^{-1}$  2981 (C-H), 1739 (C=O), 1679 (C=O); 11.5:1 mixture of diastereomers at the C2-position;  $\delta_{\text{H}}$  (Major diastereomer) (400 MHz,  $\text{CDCl}_3$ ) 0.79 (3H, t,  $J=7.2$  Hz,  $\text{OCH}_2\text{CH}_3$ ), 1.14 (9H, s,  $\text{C}(\text{CH}_3)_3$ ), 1.31 (3H, t,  $J=7.2$  Hz,  $\text{OCH}_2\text{CH}_3$ ), 3.41 (1H, d,  $J=15.3$  Hz, H7), 3.48 (1H, d,

$J=15.4$  Hz, H7), 3.66 (1H, dq,  $J=7.2$  Hz, 10.8 Hz, OCH<sub>2</sub>CH<sub>3</sub>), 3.80 (1H, dq,  $J=7.1$  Hz, 10.7 Hz, OCH<sub>2</sub>CH<sub>3</sub>), 4.21 (2H, m, OCH<sub>2</sub>CH<sub>3</sub>), 4.80 (1H, br d,  $J=6.9$  Hz, H5), 5.21 (1H, d,  $J=6.9$  Hz, H4), 5.37 (1H, s, H2), 7.31-7.39 (5H, m, Ar-H);  $\delta_{\text{C}}$  (Major diastereomer) (101 MHz, CDCl<sub>3</sub>) 13.5 (OCH<sub>2</sub>CH<sub>3</sub>), 14.2 (OCH<sub>2</sub>CH<sub>3</sub>), 26.9 ((CH<sub>3</sub>)<sub>3</sub>), 37.5 (C(CH<sub>3</sub>)<sub>3</sub>), 44.0 (C7), 61.3 (OCH<sub>2</sub>CH<sub>3</sub>), 61.9 (OCH<sub>2</sub>CH<sub>3</sub>), 64.6 (C5), 80.5 (C4), 97.1 (C2), 126.5 (Ar-C), 128.4 (Ar-C), 128.6 (Ar-C), 135.1 (Ar-C), 167.4 (C=O), 168.1 (C=O), 168.1 (C=O); LRMS (ESI<sup>+</sup>)  $m/z$ : 414.2 ([M + Na]<sup>+</sup> 93%); HRMS (ESI<sup>+</sup>)  $m/z$ : [M + Na]<sup>+</sup> calcd. for C<sub>21</sub>H<sub>29</sub>NO<sub>6</sub>Na, 414.1887, found 414.1884.

**Ethyl (2R\*,4S\*,5S\*)-2-(tert-butyl)-3-(3-ethoxy-3-oxopropanoyl)-5-(p-tolyl)oxazolidine-4-carboxylate 11b**

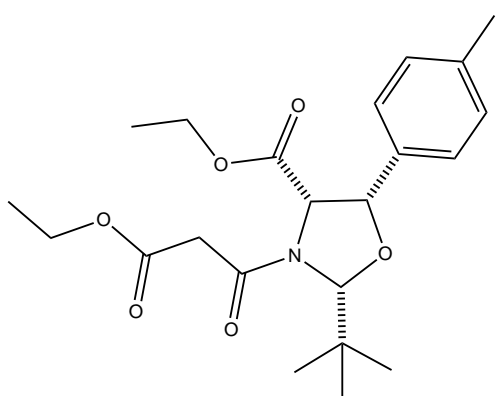

Yield (1.02 g, Quantitative); Red oil;  $\nu_{\text{max}}/\text{cm}^{-1}$  2981 (C-H), 1741 (C=O), 1680 (C=O); 9:1 mixture of diastereomers at the C2-position;  $\delta_{\text{H}}$  (Major diastereomer) (400 MHz, CDCl<sub>3</sub>) 0.82 (3H, t,  $J=7.2$  Hz, OCH<sub>2</sub>CH<sub>3</sub>), 1.15 (9H, s, C(CH<sub>3</sub>)<sub>3</sub>), 1.31 (3H, t,  $J=7.2$  Hz, OCH<sub>2</sub>CH<sub>3</sub>), 2.35 (3H, s, CH<sub>3</sub>), 3.42 (1H, d,  $J=15.4$  Hz, H7), 3.47 (1H, d,  $J=15.4$  Hz, H7), 3.71 (1H, dq,  $J=7.2$  Hz, 10.8 Hz, OCH<sub>2</sub>CH<sub>3</sub>), 3.82 (1H, dq,  $J=7.2$  Hz, 10.8 Hz, OCH<sub>2</sub>CH<sub>3</sub>), 4.22 (2H, m, OCH<sub>2</sub>CH<sub>3</sub>), 4.77 (1H, br d,  $J=6.9$  Hz, H5), 5.18 (1H, d,  $J=6.9$  Hz, H4), 5.36 (1H, s, H2), 7.15 (2H, d,  $J=7.9$  Hz, Ar-H), 7.26 (2H, d,  $J=8.1$  Hz, Ar-H);  $\delta_{\text{C}}$  (Major diastereomer) (101 MHz, CDCl<sub>3</sub>) 13.5 (OCH<sub>2</sub>CH<sub>3</sub>), 14.2 (OCH<sub>2</sub>CH<sub>3</sub>), 21.3 (CH<sub>3</sub>), 27.0 ((CH<sub>3</sub>)<sub>3</sub>), 37.5 (C(CH<sub>3</sub>)<sub>3</sub>), 44.0 (C7), 61.2 (OCH<sub>2</sub>CH<sub>3</sub>), 61.9 (OCH<sub>2</sub>CH<sub>3</sub>), 64.6 (C5), 80.5 (C4), 97.1 (C2), 126.5 (Ar-C), 129.0 (Ar-C), 132.0 (Ar-C), 138.4 (Ar-C), 167.4 (C=O), 168.1 (C=O), 168.1 (C=O); LRMS (ESI<sup>+</sup>)  $m/z$ : 428.2 ([M + Na]<sup>+</sup> 64%); HRMS (ESI<sup>+</sup>)  $m/z$ : [M + Na]<sup>+</sup> calcd. for C<sub>22</sub>H<sub>31</sub>NO<sub>6</sub>Na, 428.2044, found 428.2043.

**Ethyl (2R\*,4S\*,5S\*)-2-(tert-butyl)-5-(4-butylphenyl)-3-(3-ethoxy-3-oxopropanoyl)oxazolidine-4-carboxylate 11c**

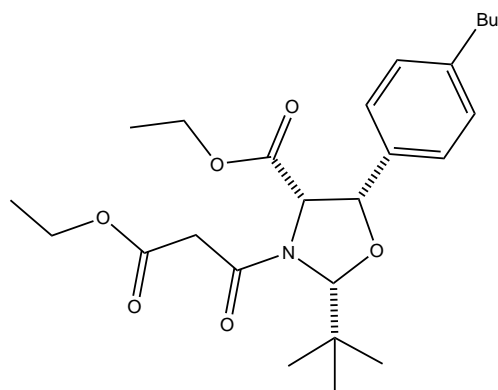

Yield (1.94 g, 60%); Yellow oil;  $R_f$  (30% EtOAc in Pet. Ether 40:60)

0.60;  $\nu_{\max}/\text{cm}^{-1}$  2958 (C-H), 2932 (C-H), 2872 (C-H), 1743 (C=O),

1681 (C=O); 9:1 mixture of diastereomers at the C2-position;  $\delta_{\text{H}}$

(Major diastereomer) (400 MHz,  $\text{CDCl}_3$ ) 0.79 (3H, t,  $J=7.2$  Hz,  $\text{OCH}_2\text{CH}_3$ ),

0.92 (3H, t,  $J=7.3$  Hz,  $\text{CH}_3\text{CH}_2$ ), 1.15 (9H, s,  $\text{C}(\text{CH}_3)_3$ ), 1.32 (5H, m,

$\text{CH}_2\text{CH}_3$ ,  $\text{OCH}_2\text{CH}_3$ ), 1.57 (2H, m,  $\text{CH}_2\text{CH}_2$ ), 2.60 (2H, m,  $\text{CH}_2\text{CH}_2$ ), 3.42

(1H, d,  $J=15.4$  Hz, H7), 3.46 (1H, d,  $J=15.3$  Hz, H7), 3.67 (1H, dq,  $J=7.1$  Hz, 10.7 Hz,  $\text{OCH}_2\text{CH}_3$ ), 3.81 (1H, dq,  $J=7.1$

Hz, 10.7 Hz,  $\text{OCH}_2\text{CH}_3$ ), 4.23 (2H, m,  $\text{OCH}_2\text{CH}_3$ ), 4.77 (1H, br d,  $J=7.0$  Hz, H5), 5.19 (1H, d,  $J=6.9$  Hz, H4), 5.37 (1H,

s, H2), 7.16 (2H, d,  $J=8.2$  Hz, Ar-H), 7.28 (2H, d,  $J=8.1$  Hz, Ar-H);  $\delta_{\text{C}}$  (Major diastereomer) (101 MHz,  $\text{CDCl}_3$ ) 13.5 ( $\text{OCH}_2\text{CH}_3$ ),

14.0 ( $\text{CH}_3\text{CH}_2$ ), 14.2 ( $\text{OCH}_2\text{CH}_3$ ), 22.4 ( $\text{CH}_2\text{CH}_3$ ), 27.0 ( $(\text{CH}_3)_3$ ), 33.8 ( $\text{CH}_2\text{CH}_2$ ), 35.5 ( $\text{CH}_2\text{CH}_2$ ), 37.5 ( $\text{C}(\text{CH}_3)_3$ ), 44.1

(C7), 61.2 ( $\text{OCH}_2\text{CH}_3$ ), 61.9 ( $\text{OCH}_2\text{CH}_3$ ), 64.7 (C5), 80.6 (C4), 97.1 (C2), 126.5 (Ar-C), 128.4 (Ar-C), 132.2 (Ar-C),

143.5 (Ar-C), 167.4 (C=O), 168.1 (C=O), 168.2 (C=O); LRMS (ESI<sup>+</sup>)  $m/z$ : 470.2 ( $[\text{M} + \text{Na}]^+$  13%); HRMS (ESI<sup>+</sup>)  $m/z$ :

$[\text{M} + \text{Na}]^+$  calcd. for  $\text{C}_{25}\text{H}_{37}\text{NO}_6\text{Na}$ , 470.2513, found 470.2513.

**Ethyl (2*R*\*,4*S*\*,5*S*\*)-2-(*tert*-butyl)-3-(3-ethoxy-3-oxopropanoyl)-5-(4-methoxyphenyl)oxazolidine-4-carboxylate 11d**

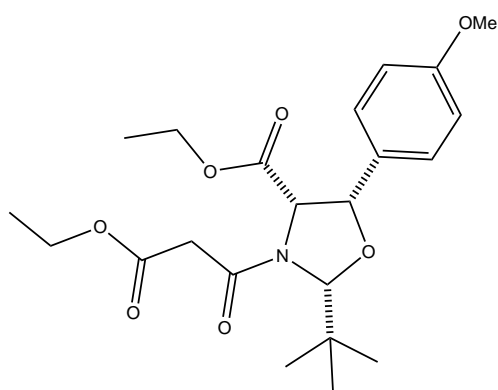

Yield (3.13 g, Quantitative); Red oil;  $\nu_{\max}/\text{cm}^{-1}$  2981 (C-H), 1742

(C=O), 1679 (C=O); 9:1 mixture of diastereomers at the C2-

position;  $\delta_{\text{H}}$  (Major diastereomer) (400 MHz,  $\text{CDCl}_3$ ) 0.86 (3H, t,  $J=7.1$  Hz,

$\text{OCH}_2\text{CH}_3$ ), 1.15 (9H, s,  $\text{C}(\text{CH}_3)_3$ ), 1.31 (3H, t,  $J=7.1$  Hz,  $\text{OCH}_2\text{CH}_3$ ),

3.42 (1H, d,  $J=15.3$  Hz, H7), 3.46 (1H, d,  $J=15.3$  Hz, H7), 3.72 (1H,

dq,  $J=7.2$  Hz, 10.8 Hz,  $\text{OCH}_2\text{CH}_3$ ), 3.80 (3H, s,  $\text{OCH}_3$ ), 3.86 (1H, m,

$\text{OCH}_2\text{CH}_3$ ), 4.22 (2H, m,  $\text{OCH}_2\text{CH}_3$ ), 4.75 (1H, br d,  $J=7.0$  Hz, H5), 5.17 (1H, d,  $J=6.9$  Hz, H4), 5.36 (1H, s, H2), 6.88

(2H, d,  $J=8.7$  Hz, Ar-H), 7.30 (2H, d,  $J=8.5$  Hz, Ar-H);  $\delta_{\text{C}}$  (Major diastereomer) (101 MHz,  $\text{CDCl}_3$ ) 13.6 ( $\text{OCH}_2\text{CH}_3$ ), 14.2

( $\text{OCH}_2\text{CH}_3$ ), 26.9 ( $(\text{CH}_3)_3$ ), 37.5 ( $\text{C}(\text{CH}_3)_3$ ), 44.0 (C7), 55.4 ( $\text{OCH}_3$ ), 61.2 ( $\text{OCH}_2\text{CH}_3$ ), 61.9 ( $\text{OCH}_2\text{CH}_3$ ), 64.7 (C5), 80.3

(C4), 97.0 (C2), 113.7 (Ar-C), 127.0 (Ar-C), 127.8 (Ar-C), 159.9 (Ar-C), 167.3 (C=O), 168.1 (C=O), 168.2 (C=O);

LRMS (ESI<sup>+</sup>) *m/z*: 444.2 ([M + Na]<sup>+</sup> 43%); HRMS (ESI<sup>+</sup>) *m/z*: [M + Na]<sup>+</sup> calcd. for C<sub>22</sub>H<sub>31</sub>NO<sub>7</sub>Na, 444.1993, found 444.1992.

**Ethyl (2*R*\*,4*S*\*,5*S*\*)-2-(*tert*-butyl)-3-(3-ethoxy-3-oxopropanoyl)-5-(4-fluorophenyl)oxazolidine-4-carboxylate**

**11e**

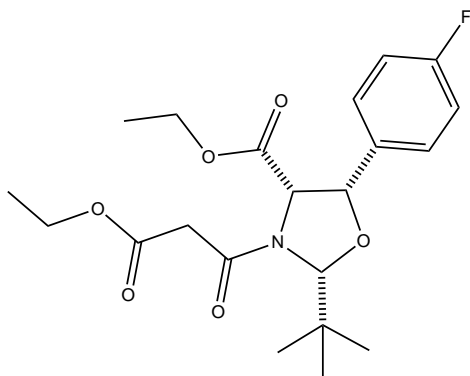

Yield (1.05 g, 37%); Yellow oil; R<sub>f</sub> (30% EtOAc in Pet. Ether 40:60) 0.53;

$\nu_{\max}/\text{cm}^{-1}$  2981 (C-H), 1740 (C=O), 1679 (C=O); 9:1 mixture of

diastereomers at the C2-position;  $\delta_{\text{H}}$  (Major diastereomer) (400 MHz, CDCl<sub>3</sub>)

0.86 (3H, t, *J*=7.1 Hz, OCH<sub>2</sub>CH<sub>3</sub>), 1.12 (9H, s, C(CH<sub>3</sub>)<sub>3</sub>), 1.30 (3H, t, *J*=7.2

Hz, OCH<sub>2</sub>CH<sub>3</sub>), 3.42 (1H, d, *J*=15.4 Hz, H7), 3.48 (1H, d, *J*=15.3 Hz, H7),

3.72 (1H, dq, *J*=7.1 Hz, 10.8 Hz, OCH<sub>2</sub>CH<sub>3</sub>), 3.83 (1H, dq, *J*=7.2 Hz, 10.8

Hz, OCH<sub>2</sub>CH<sub>3</sub>), 4.21 (2H, m, OCH<sub>2</sub>CH<sub>3</sub>), 4.79 (1H, br d, *J*=6.8 Hz, H5), 5.18 (1H, d, *J*=6.8 Hz, H4), 5.36 (1H, s, H2),

7.04 (2H, app t, *J*=8.7 Hz, Ar-H), 7.36 (2H, dd, *J*=5.3 Hz, 8.6 Hz, Ar-H);  $\delta_{\text{C}}$  (Major diastereomer) (101 MHz, CDCl<sub>3</sub>) 13.7

(OCH<sub>2</sub>CH<sub>3</sub>), 14.2 (OCH<sub>2</sub>CH<sub>3</sub>), 26.9 ((CH<sub>3</sub>)<sub>3</sub>), 37.5 (C(CH<sub>3</sub>)<sub>3</sub>), 44.0 (C7), 61.4 (OCH<sub>2</sub>CH<sub>3</sub>), 62.0 (OCH<sub>2</sub>CH<sub>3</sub>), 64.4 (C5),

79.9 (C4), 97.1 (C2), 115.3 (d, *J*=22.0 Hz, Ar-C), 128.3 (d, *J*=8.4 Hz, Ar-C), 131.0 (d, *J*=3.2 Hz, Ar-C), 163.2 (d,

*J*=247.1 Hz, Ar-C), 167.5 (C=O), 168.0 (C=O), 168.1 (C=O);  $\delta_{\text{F}}$  (Major diastereomer) (377 MHz, CDCl<sub>3</sub>) -113.30; LRMS (ESI<sup>+</sup>)

*m/z*: 432.2 ([M + Na]<sup>+</sup> 97%); HRMS (ESI<sup>+</sup>) *m/z*: [M + Na]<sup>+</sup> calcd. for C<sub>21</sub>H<sub>28</sub>NO<sub>6</sub>FNa, 432.1793, found 432.1791.

**Ethyl (2*R*\*,4*S*\*,5*S*\*)-2-(*tert*-butyl)-5-(4-chlorophenyl)-3-(3-ethoxy-3-oxopropanoyl)oxazolidine-4-carboxylate**

**11f**

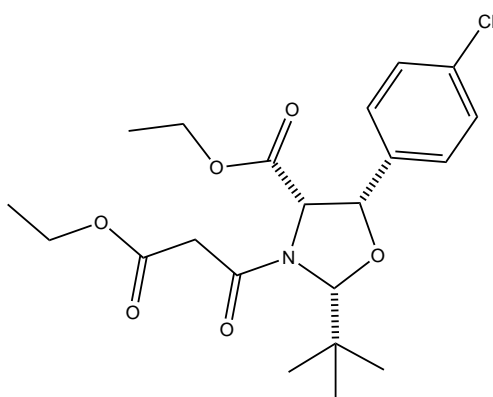

Yield (1.61 g, 76%); Yellow oil; R<sub>f</sub> (20% EtOAc in Pet. Ether 40:60)

0.20;  $\nu_{\max}/\text{cm}^{-1}$  2980 (C-H), 1740 (C=O), 1678 (C=O); 9:1 mixture of

diastereomers at the C2-position;  $\delta_{\text{H}}$  (Major diastereomer) (400 MHz,

CDCl<sub>3</sub>) 0.86 (3H, t, *J*=7.2 Hz, OCH<sub>2</sub>CH<sub>3</sub>), 1.11 (9H, s, C(CH<sub>3</sub>)<sub>3</sub>), 1.30

(3H, t, *J*=7.1 Hz, OCH<sub>2</sub>CH<sub>3</sub>), 3.43 (1H, d, *J*=15.3 Hz, H7), 3.50 (1H, d,

*J*=15.3 Hz, H7), 3.79 (2H, m, OCH<sub>2</sub>CH<sub>3</sub>), 4.22 (2H, m, OCH<sub>2</sub>CH<sub>3</sub>), 4.81

(1H, br d, *J*=6.8 Hz, H5), 5.17 (1H, d, *J*=6.7 Hz, H4), 5.37 (1H, s, H2), 7.32 (4H, m, Ar-H);  $\delta_{\text{C}}$  (Major diastereomer) (101

MHz, CDCl<sub>3</sub>) 13.6 (OCH<sub>2</sub>CH<sub>3</sub>), 14.2 (OCH<sub>2</sub>CH<sub>3</sub>), 26.8 ((CH<sub>3</sub>)<sub>3</sub>), 37.5 (C(CH<sub>3</sub>)<sub>3</sub>), 43.9 (C7), 61.4 (OCH<sub>2</sub>CH<sub>3</sub>), 62.0 (OCH<sub>2</sub>CH<sub>3</sub>), 64.2 (C5), 79.8 (C4), 97.1 (C2), 127.9 (Ar-C), 128.5 (Ar-C), 133.8 (Ar-C), 134.4 (Ar-C), 167.5 (C=O), 167.8 (C=O), 168.1 (C=O); LRMS (ESI<sup>+</sup>) *m/z*: 448.2 ([M<sup>35</sup> + Na]<sup>+</sup> 65%), 450.2 ([M<sup>37</sup> + Na]<sup>+</sup> 19%); HRMS (ESI<sup>+</sup>) *m/z*: [M<sup>35</sup> + Na]<sup>+</sup> calcd. for C<sub>21</sub>H<sub>28</sub>NO<sub>6</sub>ClNa, 448.1497, found 448.1498; [M<sup>37</sup> + Na]<sup>+</sup> calcd. for C<sub>21</sub>H<sub>28</sub>NO<sub>6</sub>ClNa, 450.1470, found 450.1468.

**Ethyl (2*R*\*,4*S*\*,5*S*\*)-5-(4-bromophenyl)-2-(*tert*-butyl)-3-(3-ethoxy-3-oxopropanoyl)oxazolidine-4-carboxylate 11g**

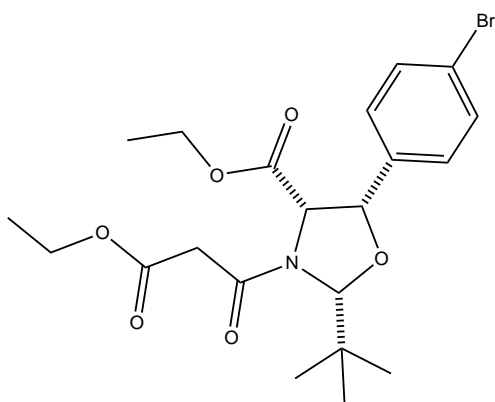

Yield (648 mg, 69%); Yellow oil; R<sub>f</sub> (30% EtOAc in Pet. Ether 40:60) 0.55;  $\nu_{\max}/\text{cm}^{-1}$  2980 (C-H), 1741 (C=O), 1679 (C=O); 91:9 mixture of diastereomers at the C2-position;  $\delta_{\text{H}}$  (Major diastereomer) (400 MHz, CDCl<sub>3</sub>) 0.88 (3H, t, *J*=7.2 Hz, OCH<sub>2</sub>CH<sub>3</sub>), 1.12 (9H, s, C(CH<sub>3</sub>)<sub>3</sub>), 1.31 (3H, t, *J*=7.1 Hz, OCH<sub>2</sub>CH<sub>3</sub>), 3.43 (1H, d, *J*=15.3 Hz, H7), 3.52 (1H, d, *J*=15.3 Hz, H7), 3.76 (1H, dq, *J*=7.1 Hz, 10.8 Hz, OCH<sub>2</sub>CH<sub>3</sub>), 3.85 (1H, dq, *J*=7.2 Hz, 10.8 Hz, OCH<sub>2</sub>CH<sub>3</sub>), 4.23 (2H, m, OCH<sub>2</sub>CH<sub>3</sub>), 4.82 (1H, br d, *J*=6.7 Hz, H5), 5.16 (1H, d, *J*=6.7 Hz, H4), 5.38 (1H, s, H2), 7.27 (2H, d, *J*=8.4 Hz, Ar-H), 7.49 (2H, d, *J*=8.4 Hz, Ar-H);  $\delta_{\text{C}}$  (Major diastereomer) (101 MHz, CDCl<sub>3</sub>) 13.6 (OCH<sub>2</sub>CH<sub>3</sub>), 14.2 (OCH<sub>2</sub>CH<sub>3</sub>), 26.8 ((CH<sub>3</sub>)<sub>3</sub>), 37.5 (C(CH<sub>3</sub>)<sub>3</sub>), 43.9 (C7), 61.4 (OCH<sub>2</sub>CH<sub>3</sub>), 62.0 (OCH<sub>2</sub>CH<sub>3</sub>), 64.1 (C5), 79.8 (C4), 97.1 (C2), 122.5 (Ar-C), 128.2 (Ar-C), 131.5 (Ar-C), 134.3 (Ar-C), 167.5 (C=O), 167.8 (C=O), 168.1 (C=O); LRMS (ESI<sup>+</sup>) *m/z*: 492.0 ([M<sup>79</sup> + Na]<sup>+</sup> 97%), 494.0 ([M<sup>81</sup> + Na]<sup>+</sup> 81%); HRMS (ESI<sup>+</sup>) *m/z*: [M<sup>79</sup> + Na]<sup>+</sup> calcd. for C<sub>21</sub>H<sub>28</sub>NO<sub>6</sub>BrNa, 492.0992, found 492.0994; [M<sup>81</sup> + Na]<sup>+</sup> calcd. for C<sub>21</sub>H<sub>28</sub>NO<sub>6</sub>BrNa, 494.0973, found 494.0974.

**Ethyl (2*R*\*,4*S*\*,5*S*\*)-2-(*tert*-butyl)-5-(4-cyanophenyl)-3-(3-ethoxy-3-oxopropanoyl)oxazolidine-4-carboxylate 11h**

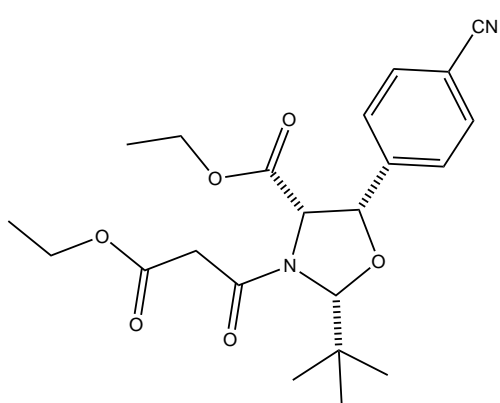

Yield (568 mg, 68%); Yellow oil;  $R_f$  (30% EtOAc in Pet. Ether 40:60)

0.28;  $\nu_{\max}/\text{cm}^{-1}$  2980 (C-H), 2229 (C $\equiv$ N), 1740 (C=O), 1678 (C=O);

9:1 mixture of diastereomers at the C2-position;  $\delta_{\text{H}}$  (Major diastereomer)

(400 MHz, CDCl<sub>3</sub>) 0.88 (3H, t,  $J=7.1$  Hz, OCH<sub>2</sub>CH<sub>3</sub>), 1.09 (9H, s,

C(CH<sub>3</sub>)<sub>3</sub>), 1.31 (3H, t,  $J=7.1$  Hz, OCH<sub>2</sub>CH<sub>3</sub>), 3.46 (1H, d,  $J=15.3$  Hz, H7),

3.59 (1H, d,  $J=15.3$  Hz, H7), 3.77 (1H, dq,  $J=7.2$  Hz, 10.8 Hz,

OCH<sub>2</sub>CH<sub>3</sub>), 3.86 (1H, dq,  $J=7.1$  Hz, 10.8 Hz, OCH<sub>2</sub>CH<sub>3</sub>), 4.23 (2H, m, OCH<sub>2</sub>CH<sub>3</sub>), 4.93 (1H, br d,  $J=6.5$  Hz, H5), 5.22

(1H, d,  $J=6.4$  Hz, H4), 5.40 (1H, s, H2), 7.51 (2H, d,  $J=8.0$  Hz, Ar-H), 7.65 (2H, d,  $J=8.4$  Hz, Ar-H);  $\delta_{\text{C}}$  (Major diastereomer)

(101 MHz, CDCl<sub>3</sub>) 13.7 (OCH<sub>2</sub>CH<sub>3</sub>), 14.2 (OCH<sub>2</sub>CH<sub>3</sub>), 26.6 ((CH<sub>3</sub>)<sub>3</sub>), 37.4 (C(CH<sub>3</sub>)<sub>3</sub>), 43.8 (C7), 61.6 (OCH<sub>2</sub>CH<sub>3</sub>), 62.0

(OCH<sub>2</sub>CH<sub>3</sub>), 63.6 (C5), 79.4 (C4), 97.1 (C2), 112.2 (Ar-C), 118.6 (C $\equiv$ N), 127.2 (Ar-C), 132.1 (Ar-C), 140.8 (Ar-C),

167.5 (C=O), 167.6 (C=O), 168.1 (C=O); LRMS (ESI<sup>+</sup>)  $m/z$ : 439.0 ([M + Na]<sup>+</sup> 100%); HRMS (ESI<sup>+</sup>)  $m/z$ : [M + Na]<sup>+</sup>

calcd. for C<sub>22</sub>H<sub>28</sub>N<sub>2</sub>O<sub>6</sub>Na, 439.1840, found 439.1837.

**Ethyl (2R\*,4S\*,5S\*)-2-(tert-butyl)-3-(3-ethoxy-3-oxopropanoyl)-5-(4-(trifluoromethyl)phenyl)oxazolidine-4-carboxylate 11i**

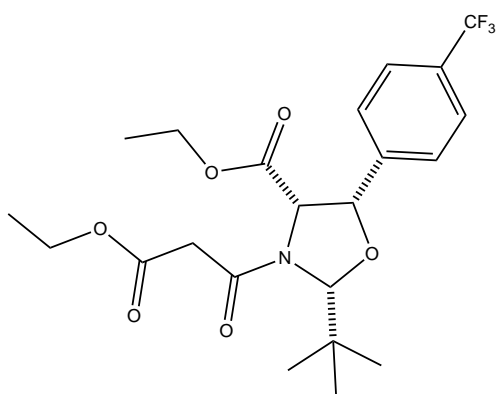

Yield (562 mg, 59%); Pale yellow oil;  $R_f$  (30% EtOAc in Pet. Ether

40:60) 0.50;  $\nu_{\max}/\text{cm}^{-1}$  2982 (C-H), 1741 (C=O), 1679 (C=O); 93:7

mixture of diastereomers at the C2-position;  $\delta_{\text{H}}$  (Major diastereomer) (400

MHz, CDCl<sub>3</sub>) 0.80 (3H, t,  $J=7.2$  Hz, OCH<sub>2</sub>CH<sub>3</sub>), 1.12 (9H, s, C(CH<sub>3</sub>)<sub>3</sub>),

1.31 (3H, t,  $J=7.1$  Hz, OCH<sub>2</sub>CH<sub>3</sub>), 3.45 (1H, d,  $J=15.3$  Hz, H7), 3.55 (1H,

d,  $J=15.3$  Hz, H7), 3.72 (1H, dq,  $J=7.1$  Hz, 10.8 Hz, OCH<sub>2</sub>CH<sub>3</sub>), 3.82

(1H, dq,  $J=7.1$  Hz, 10.8 Hz, OCH<sub>2</sub>CH<sub>3</sub>), 4.23 (2H, m, OCH<sub>2</sub>CH<sub>3</sub>), 4.90 (1H, d,  $J=6.6$  Hz, H5), 5.25 (1H, d,  $J=6.6$  Hz,

H4), 5.40 (1H, s, H2), 7.52 (2H, d,  $J=8.5$  Hz, Ar-H), 7.63 (2H, d,  $J=8.2$  Hz, Ar-H);  $\delta_{\text{C}}$  (Major diastereomer) (101 MHz, CDCl<sub>3</sub>)

13.5 (OCH<sub>2</sub>CH<sub>3</sub>), 14.2 (OCH<sub>2</sub>CH<sub>3</sub>), 26.8 ((CH<sub>3</sub>)<sub>3</sub>), 37.5 (C(CH<sub>3</sub>)<sub>3</sub>), 43.9 (C7), 61.5 (OCH<sub>2</sub>CH<sub>3</sub>), 62.0 (OCH<sub>2</sub>CH<sub>3</sub>), 64.0

(C5), 79.7 (C4), 97.2 (C2), 125.3 (q,  $J=3.8$  Hz, Ar-C), 126.9 (Ar-C), 130.8 (d,  $J=32.6$  Hz, Ar-C), 139.4 (Ar-C), 167.6

(C=O), 167.7 (C=O), 168.1 (C=O);  $\delta_{\text{F}}$  (Major diastereomer) (376 MHz, CDCl<sub>3</sub>) -62.68; LRMS (ESI<sup>+</sup>)  $m/z$ : 482.2 ([M + Na]<sup>+</sup>

97%); HRMS (ESI<sup>+</sup>)  $m/z$ : [M + Na]<sup>+</sup> calcd. for C<sub>22</sub>H<sub>28</sub>NO<sub>6</sub>F<sub>3</sub>Na, 482.1761, found 482.1758.

**Ethyl (2R\*,4S\*,5S\*)-2-(tert-butyl)-3-(3-ethoxy-3-oxopropanoyl)-5-(4-nitrophenyl)oxazolidine-4-carboxylate**

**11j**

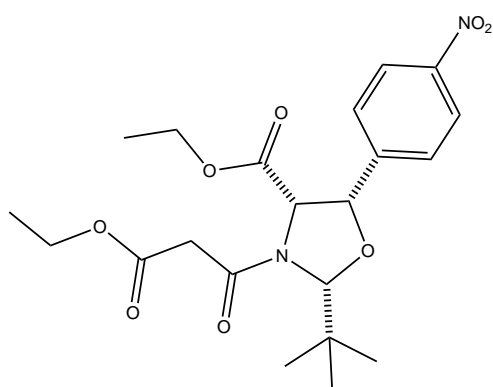

Yield (582 mg, 75%); Yellow oil;  $R_f$  (30% EtOAc in Pet. Ether 40:60) 0.33;  $\nu_{\max}/\text{cm}^{-1}$  2980 (C-H), 1739 (C=O), 1678 (C=O), 1524 (N-O); 9:1 mixture of diastereomers at the C2-position;  $\delta_{\text{H}}$  (Major diastereomer) (400 MHz,  $\text{CDCl}_3$ ) 0.90 (3H, t,  $J=7.1$  Hz,  $\text{OCH}_2\text{CH}_3$ ), 1.09 (9H, s,  $\text{C}(\text{CH}_3)_3$ ), 1.31 (3H, t,  $J=7.1$  Hz,  $\text{OCH}_2\text{CH}_3$ ), 3.47 (1H, d,  $J=15.3$  Hz, H7), 3.63 (1H, d,  $J=15.3$  Hz, H7), 3.78 (1H, dq,  $J=7.2$  Hz, 10.9 Hz,  $\text{OCH}_2\text{CH}_3$ ), 3.87 (1H, m,  $\text{OCH}_2\text{CH}_3$ ), 4.23 (2H, m,  $\text{OCH}_2\text{CH}_3$ ), 4.98 (1H, br d,  $J=6.3$  Hz, H5), 5.27 (1H, d,  $J=6.3$  Hz, H4), 5.42 (1H, s, H2), 7.57 (2H, d,  $J=8.5$  Hz, Ar-H), 8.22 (2H, d,  $J=8.7$  Hz, Ar-H);  $\delta_{\text{C}}$  (Major diastereomer) (101 MHz,  $\text{CDCl}_3$ ) 13.7 ( $\text{OCH}_2\text{CH}_3$ ), 14.2 ( $\text{OCH}_2\text{CH}_3$ ), 26.6 ( $(\text{CH}_3)_3$ ), 37.4 ( $\text{C}(\text{CH}_3)_3$ ), 43.7 (C7), 61.6 ( $\text{OCH}_2\text{CH}_3$ ), 62.1 ( $\text{OCH}_2\text{CH}_3$ ), 63.5 (C5), 79.2 (C4), 97.1 (C2), 123.5 (Ar-C), 127.3 (Ar-C), 142.8 (Ar-C), 147.9 (Ar-C), 167.4 (C=O), 167.7 (C=O), 168.1 (C=O); LRMS (ESI<sup>+</sup>)  $m/z$ : 459.2 ( $[\text{M} + \text{Na}]^+$  100%); HRMS (ESI<sup>+</sup>)  $m/z$ :  $[\text{M} + \text{Na}]^+$  calcd. for  $\text{C}_{21}\text{H}_{28}\text{N}_2\text{O}_8\text{Na}$ , 459.1738, found 459.1736.

**Ethyl (2R\*,4S\*,5S\*)-2-(tert-butyl)-3-(3-ethoxy-3-oxopropanoyl)-5-(3-methoxyphenyl)oxazolidine-4-carboxylate 11k**

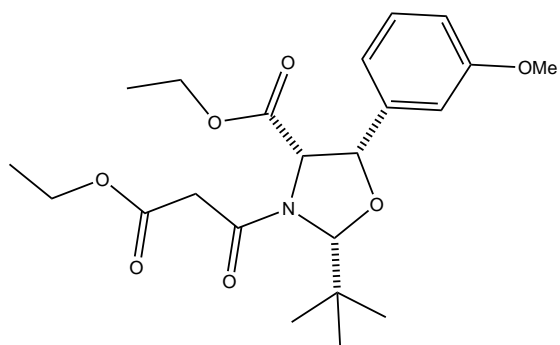

Yield (533 mg, 68%); Yellow oil;  $R_f$  (30% EtOAc in Pet. Ether 40:60) 0.55;  $\nu_{\max}/\text{cm}^{-1}$  2980 (C-H), 1741 (C=O), 1679 (C=O); 89:11 mixture of diastereomers at the C2-position;  $\delta_{\text{H}}$  (Major diastereomer) (400 MHz,  $\text{CDCl}_3$ ) 0.84 (3H, t,  $J=7.2$  Hz,  $\text{OCH}_2\text{CH}_3$ ), 1.15 (9H, s,  $\text{C}(\text{CH}_3)_3$ ), 1.31 (3H, t,  $J=7.1$  Hz,  $\text{OCH}_2\text{CH}_3$ ), 3.42 (1H, d,  $J=15.3$  Hz, H7), 3.49 (1H, d,  $J=15.3$  Hz, H7), 3.72 (1H, dq,  $J=7.2$  Hz, 10.8 Hz,  $\text{OCH}_2\text{CH}_3$ ), 3.80 (3H, s,  $\text{OCH}_3$ ), 3.82 (1H, m,  $\text{OCH}_2\text{CH}_3$ ), 4.22 (2H, m,  $\text{OCH}_2\text{CH}_3$ ), 4.80 (1H, br d,  $J=6.9$  Hz, H5), 5.18 (1H, d,  $J=6.8$  Hz, H4), 5.38 (1H, s, H2), 6.86 (1H, m, Ar-H), 6.96 (2H, m, Ar-H), 7.26 (1H, m, Ar-H);  $\delta_{\text{C}}$  (Major diastereomer) (101 MHz,  $\text{CDCl}_3$ ) 13.6 ( $\text{OCH}_2\text{CH}_3$ ), 14.2 ( $\text{OCH}_2\text{CH}_3$ ), 27.0 ( $(\text{CH}_3)_3$ ), 37.5 ( $\text{C}(\text{CH}_3)_3$ ), 44.0 (C7),

55.4 (OCH<sub>3</sub>), 61.3 (OCH<sub>2</sub>CH<sub>3</sub>), 61.9 (OCH<sub>2</sub>CH<sub>3</sub>), 64.5 (C5), 80.4 (C4), 97.1 (C2), 112.2 (Ar-C), 114.0 (Ar-C), 118.9 (Ar-C), 129.4 (Ar-C), 136.7 (Ar-C), 159.7 (Ar-C), 167.4 (C=O), 168.1 (C=O), 168.1 (C=O); LRMS (ESI<sup>+</sup>) *m/z*: 422.2 ([M + H]<sup>+</sup> 75%); HRMS (ESI<sup>+</sup>) *m/z*: [M + Na]<sup>+</sup> calcd. for C<sub>22</sub>H<sub>31</sub>NO<sub>7</sub>Na, 444.1993, found 444.1991.

**Ethyl (2*R*\*,4*S*\*,5*S*\*)-2-(*tert*-butyl)-5-(3-chlorophenyl)-3-(3-ethoxy-3-oxopropanoyl)oxazolidine-4-carboxylate**

**11l**

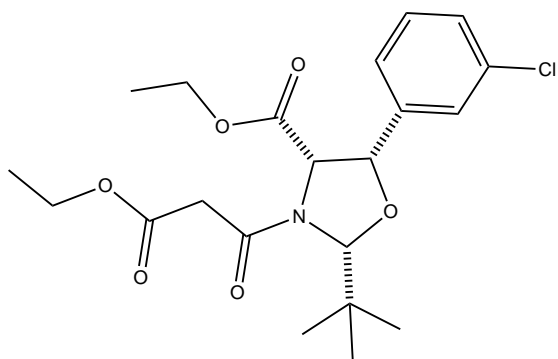

Yield (650 mg, 72%); Off-white solid; m.p. 118-121°C; R<sub>f</sub> (30% EtOAc in Pet. Ether 40:60) 0.63;  $\nu_{\max}/\text{cm}^{-1}$  2980 (C-H), 1740 (C=O), 1678 (C=O); 9:1 mixture of diastereomers at the C2-position;  $\delta_{\text{H}}$  (Major diastereomer) (400 MHz, CDCl<sub>3</sub>) 0.87 (3H, t, *J*=7.2 Hz, OCH<sub>2</sub>CH<sub>3</sub>), 1.13 (9H, s, C(CH<sub>3</sub>)<sub>3</sub>), 1.31 (3H, t, *J*=7.2 Hz, OCH<sub>2</sub>CH<sub>3</sub>), 3.43 (1H, d, *J*=15.4 Hz, H7), 3.53 (1H, d, *J*=15.3 Hz,

H7), 3.77 (1H, dq, *J*=7.1 Hz, 10.8 Hz, OCH<sub>2</sub>CH<sub>3</sub>), 3.86 (1H, dq, *J*=7.2 Hz, 10.8 Hz, OCH<sub>2</sub>CH<sub>3</sub>), 4.24 (2H, m, OCH<sub>2</sub>CH<sub>3</sub>), 4.84 (1H, br d, *J*=6.7 Hz, H5), 5.17 (1H, d, *J*=6.7 Hz, H4), 5.38 (1H, s, H2), 7.26-7.31 (3H, m, Ar-H), 7.38 (1H, m, Ar-H);  $\delta_{\text{C}}$  (Major diastereomer) (101 MHz, CDCl<sub>3</sub>) 13.6 (OCH<sub>2</sub>CH<sub>3</sub>), 14.2 (OCH<sub>2</sub>CH<sub>3</sub>), 26.8 ((CH<sub>3</sub>)<sub>3</sub>), 37.5 (C(CH<sub>3</sub>)<sub>3</sub>), 43.9 (C7), 61.4 (OCH<sub>2</sub>CH<sub>3</sub>), 62.0 (OCH<sub>2</sub>CH<sub>3</sub>), 64.2 (C5), 79.7 (C4), 97.1 (C2), 124.7 (Ar-C), 126.7 (Ar-C), 128.7 (Ar-C), 129.6 (Ar-C), 134.4 (Ar-C), 137.3 (Ar-C), 167.5 (C=O), 167.8 (C=O), 168.1 (C=O); LRMS (ESI<sup>+</sup>) *m/z*: 448.2 ([M<sup>35</sup> + Na]<sup>+</sup> 96%), 450.2 ([M<sup>37</sup> + Na]<sup>+</sup> 30%); HRMS (ESI<sup>+</sup>) *m/z*: [M<sup>35</sup> + Na]<sup>+</sup> calcd. for C<sub>21</sub>H<sub>28</sub>NO<sub>6</sub>ClNa, 448.1497, found 448.1498; [M<sup>37</sup> + Na]<sup>+</sup> C<sub>21</sub>H<sub>28</sub>NO<sub>6</sub>ClNa, 450.1470, found 450.1468.

**Ethyl (2*R*\*,4*S*\*,5*S*\*)-5-(3-bromophenyl)-2-(*tert*-butyl)-3-(3-ethoxy-3-oxopropanoyl)oxazolidine-4-carboxylate 11m**

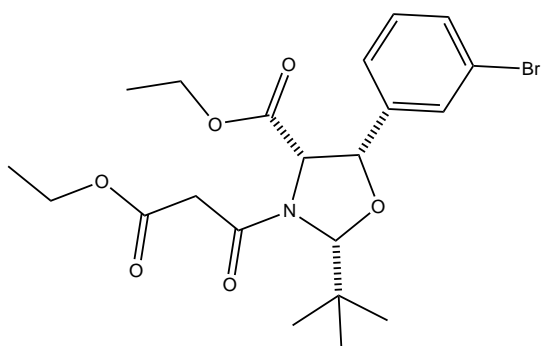

Yield (698 mg, 66%); Off-white solid; m.p. 121-124°C; R<sub>f</sub> (30% EtOAc in Pet. Ether 40:60) 0.58;  $\nu_{\max}/\text{cm}^{-1}$  2980 (C-H), 1738 (C=O), 1678 (C=O); 89:11 mixture of diastereomers at the C2-position;  $\delta_{\text{H}}$  (Major diastereomer) (400 MHz, CDCl<sub>3</sub>) 0.88 (3H, t, *J*=7.2 Hz, OCH<sub>2</sub>CH<sub>3</sub>), 1.13 (9H, s, C(CH<sub>3</sub>)<sub>3</sub>), 1.32 (3H, t, *J*=7.2 Hz, OCH<sub>2</sub>CH<sub>3</sub>),



3.44 (1H, d,  $J=15.3$  Hz, H7), 3.53 (1H, d,  $J=15.3$  Hz, H7), 3.77 (1H, dq,  $J=7.2$  Hz, 10.8 Hz, OCH<sub>2</sub>CH<sub>3</sub>), 3.86 (1H, dq,  $J=7.1$  Hz, 10.8 Hz, OCH<sub>2</sub>CH<sub>3</sub>), 4.23 (2H, m, OCH<sub>2</sub>CH<sub>3</sub>), 4.84 (1H, d,  $J=6.7$  Hz, H5), 5.17 (1H, d,  $J=6.7$  Hz, H4), 5.38 (1H, s, H2), 7.23 (1H, m, Ar-H), 7.32 (1H, m, Ar-H), 7.46 (1H, m, Ar-H), 7.53 (1H, m, Ar-H);  $\delta_{\text{C}}$  (Major diastereomer) (101 MHz, CDCl<sub>3</sub>) 13.6 (OCH<sub>2</sub>CH<sub>3</sub>), 14.2 (OCH<sub>2</sub>CH<sub>3</sub>), 26.8 ((CH<sub>3</sub>)<sub>3</sub>), 37.5 (C(CH<sub>3</sub>)<sub>3</sub>), 43.9 (C7), 61.4 (OCH<sub>2</sub>CH<sub>3</sub>), 62.0 (OCH<sub>2</sub>CH<sub>3</sub>), 64.2 (C5), 79.6 (C4), 97.1 (C2), 122.4 (Ar-C), 125.2 (Ar-C), 129.6 (Ar-C), 129.9 (Ar-C), 131.6 (Ar-C), 137.6 (Ar-C), 167.5 (C=O), 167.8 (C=O), 168.1 (C=O); LRMS (ESI<sup>+</sup>)  $m/z$ : 492.0 ([M<sup>79</sup> + Na]<sup>+</sup> 91%), 494.0 ([M<sup>81</sup> + Na]<sup>+</sup> 94%); HRMS (ESI<sup>+</sup>)  $m/z$ : [M<sup>79</sup> + Na]<sup>+</sup> calcd. for C<sub>21</sub>H<sub>28</sub>NO<sub>6</sub>BrNa, 492.0992, found 492.0992; [M<sup>81</sup> + Na]<sup>+</sup> calcd. for C<sub>21</sub>H<sub>28</sub>NO<sub>6</sub>BrNa, 494.0971, found 494.0971.

**Ethyl (2*R*\*,4*S*\*,5*S*\*)-2-(*tert*-butyl)-3-(3-ethoxy-3-oxopropanoyl)-5-(2-fluorophenyl)oxazolidine-4-carboxylate**

**11n**

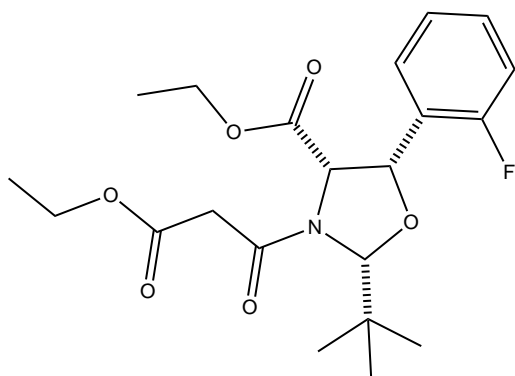

Yield (512 mg, 61%); Off-white solid; m.p. 66-69°C; R<sub>f</sub> (30% EtOAc in Pet. Ether 40:60) 0.80;  $\nu_{\text{max}}$ /cm<sup>-1</sup> 2980 (C-H), 1743 (C=O), 1680 (C=O); 92:8 mixture of diastereomers at the C2-position;  $\delta_{\text{H}}$  (Major diastereomer) (400 MHz, CDCl<sub>3</sub>) 0.85 (3H, t,  $J=7.1$  Hz, OCH<sub>2</sub>CH<sub>3</sub>), 1.10 (9H, s, C(CH<sub>3</sub>)<sub>3</sub>), 1.30 (3H, t,  $J=7.1$  Hz, OCH<sub>2</sub>CH<sub>3</sub>), 3.46 (1H, d,  $J=15.4$  Hz, H7), 3.60 (1H, d,  $J=15.4$  Hz, H7), 3.81 (2H, m, OCH<sub>2</sub>CH<sub>3</sub>), 4.23

(2H, dq,  $J=4.2$  Hz, 7.1 Hz, OCH<sub>2</sub>CH<sub>3</sub>), 4.93 (1H, br d,  $J=6.3$  Hz, H5), 5.33 (1H, d,  $J=6.3$  Hz, H4), 5.39 (1H, s, H2), 7.03 (1H, m, Ar-H), 7.17 (1H, dt,  $J=1.2$  Hz, 7.6 Hz, Ar-H), 7.31 (1H, m, Ar-H), 7.57 (1H, m, Ar-H);  $\delta_{\text{C}}$  (Major diastereomer) (101 MHz, CDCl<sub>3</sub>) 13.6 (OCH<sub>2</sub>CH<sub>3</sub>), 14.2 (OCH<sub>2</sub>CH<sub>3</sub>), 26.7 ((CH<sub>3</sub>)<sub>3</sub>), 37.4 (C(CH<sub>3</sub>)<sub>3</sub>), 43.9 (C7), 61.3 (OCH<sub>2</sub>CH<sub>3</sub>), 62.0 (OCH<sub>2</sub>CH<sub>3</sub>), 62.6 (d,  $J=1.7$  Hz, C5), 74.8 (d,  $J=3.8$  Hz, C4), 96.5 (C2), 114.7 (d,  $J=20.5$  Hz, Ar-C), 123.3 (d,  $J=13.6$  Hz, Ar-C), 124.3 (d,  $J=3.3$  Hz, Ar-C), 127.3 (d,  $J=3.9$  Hz, Ar-C), 129.7 (d,  $J=8.2$  Hz, Ar-C), 159.8 (d,  $J=245.4$  Hz, Ar-C), 167.2 (C=O), 167.8 (C=O), 168.2 (C=O);  $\delta_{\text{F}}$  (Major diastereomer) (377 MHz, CDCl<sub>3</sub>) -117.95; LRMS (ESI<sup>+</sup>)  $m/z$ : 432.2 ([M + Na]<sup>+</sup> 96%); HRMS (ESI<sup>+</sup>)  $m/z$ : [M + Na]<sup>+</sup> calcd. for C<sub>21</sub>H<sub>28</sub>NO<sub>6</sub>FNa, 432.1793, found 432.1792.

**Ethyl (2*R*\*,4*S*\*,5*S*\*)-5-(2-bromophenyl)-2-(*tert*-butyl)-3-(3-ethoxy-3-oxopropanoyl)oxazolidine-4-carboxylate 11o**

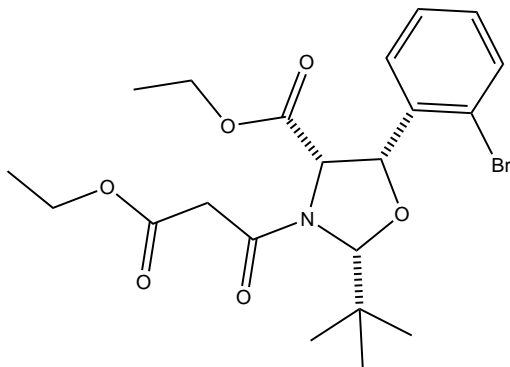

Yield (707 mg, 54%); White solid; m.p. 135-139°C;  $R_f$  (30% EtOAc in Pet. Ether 40:60) 0.73;  $\nu_{\max}/\text{cm}^{-1}$  2979 (C-H), 1743 (C=O), 1680 (C=O); >95:5 mixture of diastereomers at the C2-position;  $\delta_{\text{H}}$  (Major diastereomer) (400 MHz,  $\text{CDCl}_3$ ) 0.81 (3H, t,  $J=7.2$  Hz,  $\text{OCH}_2\text{CH}_3$ ), 1.12 (9H, s,  $\text{C}(\text{CH}_3)_3$ ), 1.31 (3H, t,  $J=7.1$  Hz,  $\text{OCH}_2\text{CH}_3$ ), 3.46 (1H, d,  $J=15.5$  Hz, H7), 3.56 (1H, d,  $J=15.4$  Hz, H7), 3.72 (1H, dq,  $J=7.2$  Hz, 10.7 Hz,

$\text{OCH}_2\text{CH}_3$ ), 3.81 (1H, dq,  $J=7.2$  Hz, 10.8 Hz,  $\text{OCH}_2\text{CH}_3$ ), 4.23 (2H, dq,  $J=1.0$  Hz, 7.2 Hz,  $\text{OCH}_2\text{CH}_3$ ), 5.15 (1H, br d,  $J=6.5$  Hz, H5), 5.33 (1H, d,  $J=6.5$  Hz, H4), 5.40 (1H, s, H2), 7.20 (1H, dt,  $J=1.7$  Hz, 7.7 Hz, Ar-H), 7.34 (1H, dt,  $J=1.3$  Hz, 7.6 Hz, Ar-H), 7.54 (1H, dd,  $J=1.2$  Hz, 8.0 Hz, Ar-H), 7.63 (1H, ddd,  $J=0.7$  Hz, 1.7 Hz, 7.8 Hz, Ar-H);  $\delta_{\text{C}}$  (Major diastereomer) (101 MHz,  $\text{CDCl}_3$ ) 13.6 ( $\text{OCH}_2\text{CH}_3$ ), 14.3 ( $\text{OCH}_2\text{CH}_3$ ), 26.8 ( $(\text{CH}_3)_3$ ), 37.5 ( $\text{C}(\text{CH}_3)_3$ ), 44.0 (C7), 61.3 ( $\text{OCH}_2\text{CH}_3$ ), 61.8 (C5), 62.0 ( $\text{OCH}_2\text{CH}_3$ ), 79.6 (C4), 96.5 (C2), 122.2 (Ar-C), 127.5 (Ar-C), 128.1 (Ar-C), 129.8 (Ar-C), 132.3 (Ar-C), 135.4 (Ar-C), 167.2 (C=O), 167.8 (C=O), 168.3 (C=O); LRMS (ESI<sup>+</sup>)  $m/z$ : 492.0 ( $[\text{M}^{79} + \text{Na}]^+$  89%), 494.0 ( $[\text{M}^{81} + \text{Na}]^+$  96%); HRMS (ESI<sup>+</sup>)  $m/z$ :  $[\text{M}^{79} + \text{Na}]^+$  calcd. for  $\text{C}_{21}\text{H}_{28}\text{NO}_6\text{BrNa}$ , 492.0992, found 492.0992;  $[\text{M}^{81} + \text{Na}]^+$  calcd. for  $\text{C}_{21}\text{H}_{28}\text{NO}_6\text{BrNa}$ , 494.0973, found 494.0971.

**Ethyl (2*R*\*,4*S*\*,5*S*\*)-2-(*tert*-butyl)-3-(3-ethoxy-3-oxopropanoyl)-5-(pyridin-3-yl)oxazolidine-4-carboxylate**

**11p**

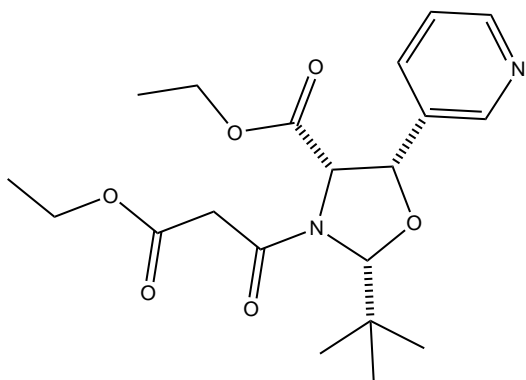

Yield (1.05 g, 68%); Yellow oil;  $R_f$  (70% EtOAc in Pet. Ether 40:60) 0.23;  $\nu_{\max}/\text{cm}^{-1}$  2979 (C-H), 1739 (C=O), 1676 (C=O); 82:18 mixture of diastereomers at the C2-position;  $\delta_{\text{H}}$  (Major diastereomer) (400 MHz,  $\text{CDCl}_3$ ) 0.85 (3H, t,  $J=7.2$  Hz,  $\text{OCH}_2\text{CH}_3$ ), 1.10 (9H, s,  $\text{C}(\text{CH}_3)_3$ ), 1.30 (3H, t,  $J=7.2$  Hz,  $\text{OCH}_2\text{CH}_3$ ), 3.44 (1H, d,  $J=15.4$  Hz, H7), 3.56 (1H, d,  $J=15.4$  Hz, H7), 3.76 (1H, dq,  $J=7.2$  Hz, 10.8 Hz,

$\text{OCH}_2\text{CH}_3$ ), 3.85 (1H, dq,  $J=7.2$  Hz, 10.8 Hz,  $\text{OCH}_2\text{CH}_3$ ), 4.21 (2H, m,  $\text{OCH}_2\text{CH}_3$ ), 4.89 (1H, br d,  $J=6.6$  Hz, H5), 5.22 (1H, d,  $J=6.6$  Hz, H4), 5.39 (1H, s, H2), 7.30 (1H, m, Ar-H), 7.74 (1H, m, Ar-H), 8.58 (2H, m, Ar-H);  $\delta_{\text{C}}$  (Major diastereomer) (101 MHz,  $\text{CDCl}_3$ ) 13.7 ( $\text{OCH}_2\text{CH}_3$ ), 14.2 ( $\text{OCH}_2\text{CH}_3$ ), 26.7 ( $(\text{CH}_3)_3$ ), 37.4 ( $\text{C}(\text{CH}_3)_3$ ), 43.9 (C7), 61.5 ( $\text{OCH}_2\text{CH}_3$ ), 62.0 ( $\text{OCH}_2\text{CH}_3$ ), 63.9 (C5), 78.3 (C4), 97.1 (C2), 123.3 (Ar-C), 131.3 (Ar-C), 134.3 (Ar-C), 148.1 (Ar-C), 149.6 (Ar-C),

167.5 (C=O), 167.7 (C=O), 168.1 (C=O); LRMS (ESI<sup>+</sup>) *m/z*: 393.2 ([M + H]<sup>+</sup> 96%), 415.2 ([M + Na]<sup>+</sup> 96%); HRMS (ESI<sup>+</sup>) *m/z*: [M + H]<sup>+</sup> calcd. for C<sub>20</sub>H<sub>29</sub>N<sub>2</sub>O<sub>6</sub>, 393.2020, found 393.2020.

### General procedure for the monosaponification of diethyl methyl malonate **12a** and the formation of the acyl chloride **12c**.<sup>16</sup>

Added dropwise to a stirring 1 M KOH solution (1 eq.) (eth.) at 0°C was diethyl methyl malonate **12a** (1 eq.) and this reaction mixture was refluxed for 2 h. The reaction mixture was then filtered and concentrated to give a white solid. Water was then added to the concentrate and acidified to pH 3 using 3 M HCl solution (aq.) and extracted with Et<sub>2</sub>O. The organic layer was washed with brine, dried over Na<sub>2</sub>SO<sub>4</sub>, filtered and evaporated *in-vacuo* to obtain the carboxylic acid **12'** as a colourless oil and was used without further purification. SOCl<sub>2</sub> (2 eq.) was added dropwise to a solution of monoethyl methyl malonate **12'** (1 eq.) at 0°C and this solution was then stirred for 3.5 h at 50°C. This solution was then concentrated *in-vacuo* to obtain the acyl chloride **12c** as a yellow/orange oil and was used without further purification.

### 3-Ethoxy-2-methyl-3-oxopropanoic acid **12'**

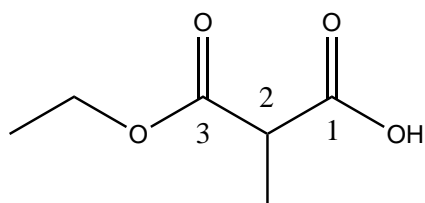

Yield (5.38 g, 71%); Colourless oil;  $\nu_{\max}/\text{cm}^{-1}$  3187 (O-H), 2988 (C-H), 1714 (C=O);  $\delta_{\text{H}}$  (400 MHz, CDCl<sub>3</sub>) 1.26 (3H, t, *J*=7.1 Hz, OCH<sub>2</sub>CH<sub>3</sub>), 1.43 (3H, d, *J*=7.3 Hz, CH<sub>3</sub>), 3.46 (1H, q, *J*=7.3 Hz, H<sub>2</sub>), 4.20 (2H, dq, *J*=0.8 Hz, 7.2 Hz,

OCH<sub>2</sub>CH<sub>3</sub>), 9.52 (1H, br s, OH);  $\delta_{\text{C}}$  (101 MHz, CDCl<sub>3</sub>) 13.7 (CH<sub>3</sub>), 14.1 (OCH<sub>2</sub>CH<sub>3</sub>), 46.1 (C<sub>2</sub>), 61.9 (OCH<sub>2</sub>CH<sub>3</sub>), 170.0 (C=O), 175.8 (C=O); LRMS (ESI<sup>+</sup>) *m/z*: 147.0 ([M + H]<sup>+</sup> 14%), 168.9 ([M + Na]<sup>+</sup> 22%), 185.0 ([M + K]<sup>+</sup> 64%); HRMS (ESI<sup>+</sup>) *m/z*: [M + Na]<sup>+</sup> calcd. for C<sub>6</sub>H<sub>10</sub>O<sub>4</sub>Na, 169.0471, found 169.0472.

### Ethyl 3-chloro-2-methyl-3-oxopropanoate **12c**

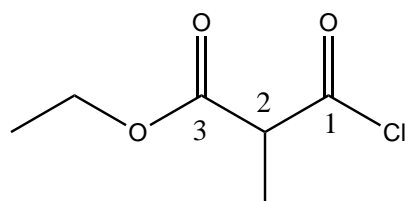

Yield (5.64 g, 93%); Yellow oil;  $\delta_{\text{H}}$  (400 MHz, CDCl<sub>3</sub>) 1.30 (3H, t, *J*=7.1 Hz, OCH<sub>2</sub>CH<sub>3</sub>), 1.52 (3H, d, *J*=7.2 Hz, CH<sub>3</sub>), 3.84 (1H, q, *J*=7.2 Hz, H<sub>2</sub>), 4.25 (2H, dq, *J*=2.8 Hz, 7.1 Hz, OCH<sub>2</sub>CH<sub>3</sub>);  $\delta_{\text{C}}$  (101 MHz, CDCl<sub>3</sub>) 14.0 (CH<sub>3</sub>), 14.2

(OCH<sub>2</sub>CH<sub>3</sub>), 57.2 (C<sub>2</sub>), 62.4 (OCH<sub>2</sub>CH<sub>3</sub>), 167.6 (C=O), 170.8 (C=O).

**Ethyl (2*R*\*,4*S*\*,5*S*\*)-2-(*tert*-butyl)-3-(3-ethoxy-2-methyl-3-oxopropanoyl)-5-phenyloxazolidine-4-carboxylate**

**13a**

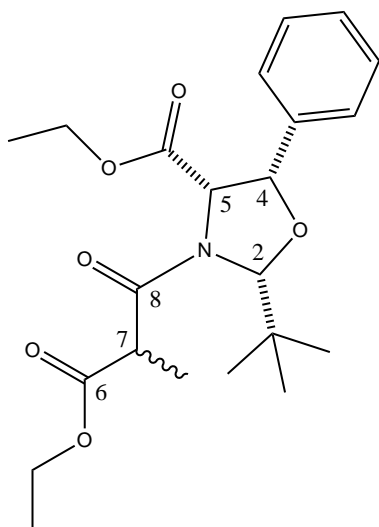

Yield (1.79 g, 76%); Pale green oil that crystallised overnight;  $R_f$  (20% EtOAc in Pet. Ether 40:60) 0.58<sub>(Minor diastereomer)</sub>, 0.35<sub>(Major diastereomer)</sub>;  $\nu_{max}/cm^{-1}$  2982 (C-H), 1740 (C=O), 1682 (C=O); 1.8:1 mixture of diastereomers at the C7-position;  $\delta_H$  (Major diastereomer) (400 MHz,  $CDCl_3$ ) 0.79 (3H, t,  $J=7.1$  Hz,  $OCH_2CH_3$ ), 1.12 (9H, s,  $C(CH_3)_3$ ), 1.32 (3H, t,  $J=7.1$  Hz,  $OCH_2CH_3$ ), 1.43 (3H, d,  $J=7.0$  Hz,  $CH_3$ ), 3.50 (1H, q,  $J=7.0$  Hz, H7), 3.68 (1H, dq,  $J=7.2$  Hz, 10.7 Hz,  $OCH_2CH_3$ ), 3.80 (1H, dq,  $J=7.1$  Hz, 10.8 Hz,  $OCH_2CH_3$ ), 4.23 (2H, dq,  $J=4.7$  Hz, 7.1 Hz,  $OCH_2CH_3$ ), 4.99 (1H, d,  $J=6.8$  Hz, H5), 5.19 (1H, d,  $J=6.8$  Hz, H4), 5.41 (1H, s,

H2), 7.31-7.39 (5H, m, Ar-H);  $\delta_C$  (Major diastereomer) (101 MHz,  $CDCl_3$ ) 13.5 ( $OCH_2CH_3$ ), 14.3 ( $CH_3$ ), 14.7 ( $OCH_2CH_3$ ), 26.9 ( $(CH_3)_3$ ), 37.4 ( $C(CH_3)_3$ ), 46.8 (C7), 61.2 ( $OCH_2CH_3$ ), 61.8 ( $OCH_2CH_3$ ), 64.4 (C5), 80.5 (C4), 96.7 (C2), 126.5 (Ar-C), 128.3 (Ar-C), 128.6 (Ar-C), 135.2 (Ar-C), 168.4 (C=O), 170.1 (C=O), 172.7 (C=O);  $\delta_H$  (Minor diastereomer) (400 MHz,  $CDCl_3$ ) 0.77 (3H, t,  $J=7.2$  Hz,  $OCH_2CH_3$ ), 1.16 (9H, s,  $C(CH_3)_3$ ), 1.24 (3H, t,  $J=7.2$  Hz,  $OCH_2CH_3$ ), 1.42 (3H, d,  $J=7.0$  Hz,  $CH_3$ ), 3.49 (1H, br s, H7), 3.60 (1H, dq,  $J=7.2$  Hz, 10.7 Hz,  $OCH_2CH_3$ ), 3.76 (1H, dq,  $J=7.1$  Hz, 10.7 Hz,  $OCH_2CH_3$ ), 4.12 (2H, dq,  $J=5.5$  Hz, 7.2 Hz,  $OCH_2CH_3$ ), 4.63 (1H, br s, H5), 5.17 (1H, d,  $J=7.0$  Hz, H4), 5.39 (1H, s, H2), 7.30-7.39 (5H, m, Ar-H);  $\delta_C$  (Minor diastereomer) (101 MHz,  $CDCl_3$ ) 13.5 ( $OCH_2CH_3$ ), 13.5 ( $OCH_2CH_3$ ), 14.1 ( $CH_3$ ), 27.0 ( $(CH_3)_3$ ), 37.7 ( $C(CH_3)_3$ ), 47.3 (C7), 61.0 ( $OCH_2CH_3$ ), 61.7 ( $OCH_2CH_3$ ), 65.0 (C5), 80.8 (C4), 97.2 (C2), 126.6 (Ar-C), 128.4 (Ar-C), 128.7 (Ar-C), 134.9 (Ar-C), 167.7 (C=O), 170.0 (C=O), 172.0 (C=O); LRMS (ESI<sup>+</sup> (Major diastereomer))  $m/z$ : 428.2 ( $[M + Na]^+$  83%); LRMS (ESI<sup>+</sup> (Minor diastereomer))  $m/z$ : 428.2 ( $[M + Na]^+$  95%); HRMS (ESI<sup>+</sup>)  $m/z$ :  $[M + Na]^+$  calcd. for  $C_{22}H_{31}NO_6Na$ , 428.2044, found 428.2041.

**General procedure for the monosaponification of diethyl phenyl malonate **12b** and the formation of the acyl chloride malonate **12d**:**<sup>17</sup>

A solution of diethyl phenyl malonate **12b** (1 eq.) in EtOH (0.7 M) was cooled to 0°C and KOH (1 eq.) was added and left to stir at this temperature for 30 mins. The mixture was then stirred at rt for 5 h and then left in the fridge overnight. The reaction mixture was then concentrated *in-vacuo* and the residue was dissolved in  $H_2O$

and extracted with Et<sub>2</sub>O. The aqueous layer was then acidified to pH 1-2, extracted with Et<sub>2</sub>O and the organic layer was washed with brine, dried over Na<sub>2</sub>SO<sub>4</sub>, filtered and evaporated *in-vacuo* to obtain carboxylic acid **12''** as a white solid and was used without further purification. To a solution of monoethyl phenyl malonate **12''** (1 eq.) in DCM (0.34 M) was added SOCl<sub>2</sub> (2 eq.) dropwise at 0°C and this solution was then refluxed for 3 h. This solution was then concentrated *in-vacuo* to obtain acyl chloride **12d** as a crude yellow oil and was used without further purification.

### 3-Ethoxy-3-oxo-2-phenylpropanoic acid **12''**

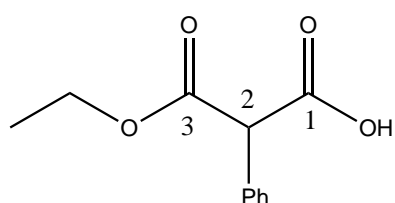

Yield (1.54 g, 35%); Colourless oil that solidified on standing; m.p. 80-85°C

(lit.<sup>18</sup> 76-77°C);  $\nu_{\max}/\text{cm}^{-1}$  3172 (O-H), 2985 (C-H), 1715 (C=O);  $\delta_{\text{H}}$  (400 MHz,

CDCl<sub>3</sub>) 1.26 (3H, t,  $J=7.1$  Hz, OCH<sub>2</sub>CH<sub>3</sub>), 4.23 (2H, m, OCH<sub>2</sub>CH<sub>3</sub>), 4.65 (1H, s,

H<sub>2</sub>), 7.34-7.42 (5H, m, Ar-H);  $\delta_{\text{C}}$  (101 MHz, CDCl<sub>3</sub>) 14.0 (OCH<sub>2</sub>CH<sub>3</sub>), 57.7 (C<sub>2</sub>), 62.3 (OCH<sub>2</sub>CH<sub>3</sub>), 128.5 (Ar-C), 128.8

(Ar-C), 129.3 (Ar-C), 132.4 (Ar-C), 168.4 (C=O), 172.8 (C=O); LRMS (ESI<sup>+</sup>)  $m/z$ : 231.0 ([M + Na] 100%); HRMS (ESI<sup>+</sup>)

$m/z$ : [M + Na]<sup>+</sup> calcd. for C<sub>11</sub>H<sub>12</sub>O<sub>4</sub>Na, 231.0628, found 231.0629.

### Ethyl 3-chloro-3-oxo-2-phenylpropanoate **12d**

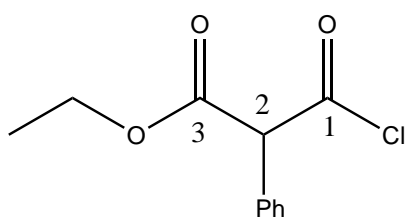

Yield (1.42 g, 93%); Yellow oil;  $\delta_{\text{H}}$  (400 MHz, CDCl<sub>3</sub>) 1.30 (3H, t,  $J=7.1$  Hz,

OCH<sub>2</sub>CH<sub>3</sub>), 4.27 (2H, m, OCH<sub>2</sub>CH<sub>3</sub>), 5.02 (1H, s, H<sub>2</sub>), 7.36-7.43 (5H, m, Ar-H);

$\delta_{\text{C}}$  (101 MHz, CDCl<sub>3</sub>) 14.0 (OCH<sub>2</sub>CH<sub>3</sub>), 62.8 (OCH<sub>2</sub>CH<sub>3</sub>), 68.4 (C<sub>2</sub>), 129.2 (Ar-

C), 129.3 (Ar-C), 129.5 (Ar-C), 130.8 (Ar-C), 165.9 (C=O), 168.7 (C=O).

### Ethyl (2*R*\*,4*S*\*,5*S*\*)-2-(*tert*-butyl)-3-(3-ethoxy-3-oxo-2-phenylpropanoyl)-5-phenyloxazolidine-4-carboxylate

#### **13b**

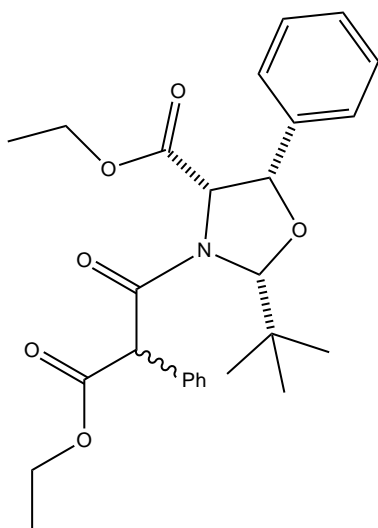

Yield (2.00 g, 70%); Pale green oil that crystallised overnight;  $R_f$  (20% EtOAc in Pet. Ether 40:60) 0.58<sub>(Minor diastereomer)</sub> and 0.45<sub>(Major diastereomer)</sub>;  $\nu_{\max}/\text{cm}^{-1}$  2980 (C-H), 1753 (C=O), 1675 (C=O); 1.7:1 mixture of diastereomers at the C7-position;  $\delta_{\text{H}}$  (Major diastereomer) (400 MHz,  $\text{CDCl}_3$ ) 0.72 (3H, t,  $J=7.2$  Hz,  $\text{OCH}_2\text{CH}_3$ ), 1.07 (9H, s,  $\text{C}(\text{CH}_3)_3$ ), 1.31 (3H, t,  $J=7.1$  Hz,  $\text{OCH}_2\text{CH}_3$ ), 3.45 (1H, m,  $\text{OCH}_2\text{CH}_3$ ), 3.59 (1H, dq,  $J=7.2$  Hz, 10.8 Hz,  $\text{OCH}_2\text{CH}_3$ ), 4.26 (2H, m,  $\text{OCH}_2\text{CH}_3$ ), 4.77 (1H, s, H7), 4.84 (1H, d,  $J=6.9$  Hz, H5), 5.22 (1H, br d,  $J=6.9$  Hz, H4), 5.44 (1H, s, H2), 7.26-7.36 (10H, m, Ar-H);  $\delta_{\text{C}}$  (Major diastereomer) (101 MHz,  $\text{CDCl}_3$ ) 13.5 ( $\text{OCH}_2\text{CH}_3$ ),

14.3 ( $\text{OCH}_2\text{CH}_3$ ), 27.1 ( $(\text{CH}_3)_3$ ), 37.6 ( $\text{C}(\text{CH}_3)_3$ ), 59.6 (C7), 61.0 ( $\text{OCH}_2\text{CH}_3$ ), 62.1 ( $\text{OCH}_2\text{CH}_3$ ), 65.1 (C5), 80.8 (C4), 97.3 (C2), 126.5 (Ar-C), 128.3 (Ar-C), 128.4 (Ar-C), 128.5 (Ar-C), 128.7 (Ar-C), 129.9 (Ar-C), 133.0 (Ar-C), 134.9 (Ar-C), 167.5 (C=O), 168.4 (C=O), 171.0 (C=O);  $\delta_{\text{H}}$  (Minor diastereomer) (400 MHz,  $\text{CDCl}_3$ ) 0.86 (3H, t,  $J=7.2$  Hz,  $\text{OCH}_2\text{CH}_3$ ), 1.19 (9H, s,  $\text{C}(\text{CH}_3)_3$ ), 1.27 (3H, t,  $J=7.1$  Hz,  $\text{OCH}_2\text{CH}_3$ ), 3.72 (1H, dq,  $J=7.2$  Hz, 10.8 Hz,  $\text{OCH}_2\text{CH}_3$ ), 3.86 (1H, dq,  $J=7.2$  Hz, 10.7 Hz,  $\text{OCH}_2\text{CH}_3$ ), 4.17 (2H, m,  $\text{OCH}_2\text{CH}_3$ ), 4.59 (1H, d,  $J=6.9$  Hz, H5), 4.66 (1H, s, H7) 4.89 (1H, d,  $J=6.9$  Hz, H4), 5.36 (1H, s, H2), 7.19-7.50 (10H, m, Ar-H);  $\delta_{\text{C}}$  (Minor diastereomer) (101 MHz,  $\text{CDCl}_3$ ) 13.7 ( $\text{OCH}_2\text{CH}_3$ ), 14.1 ( $\text{OCH}_2\text{CH}_3$ ), 27.0 ( $(\text{CH}_3)_3$ ), 37.7 ( $\text{C}(\text{CH}_3)_3$ ), 59.4 (C7), 61.2 ( $\text{OCH}_2\text{CH}_3$ ), 62.0 ( $\text{OCH}_2\text{CH}_3$ ), 63.8 (C5), 80.4 (C4), 97.2 (C2), 126.5-134.9 (Ar-C), 167.9 (C=O), 168.2 (C=O), 169.6 (C=O); LRMS (ESI<sup>+</sup> (Major diastereomer))  $m/z$ : 490.2 ( $[\text{M} + \text{Na}]^+$  96%); LRMS (ESI<sup>+</sup> (Minor diastereomer))  $m/z$ : 490.2 ( $[\text{M} + \text{Na}]^+$  94%); HRMS (ESI<sup>+</sup>)  $m/z$ :  $[\text{M} + \text{Na}]^+$  calcd. for  $\text{C}_{27}\text{H}_{33}\text{NO}_6\text{Na}$ , 490.2200, found 490.2197.

#### General procedure for the synthesis of C7-unfunctionalised tetramates **14**, **21**:<sup>19</sup>

To a solution of *N*-acylated oxazolidinone **11a-p**, **13a** and **13b** (1.0 eq.) in anhydrous THF was added DBU (1.1-1.2 eq.). The mixture was stirred overnight at rt. The reaction mixture was then cooled to 0°C, diluted with water, and partitioned between  $\text{Et}_2\text{O}$  and water and the aqueous layer was acidified to pH 1-2 using 3 M HCl solution (aq.) and extracted with EtOAc. The organic layer was washed with brine, dried over  $\text{Na}_2\text{SO}_4$ , filtered and concentrated under reduced pressure to yield the desired tetramates **14a-m**, **21a** and **21b** and was used without further purification.

**Ethyl (1S\*,3R\*,7aR\*)-3-(tert-butyl)-5,7-dioxo-1-phenyldihydro-1H,3H-pyrrolo[1,2-c]oxazole-7a(5H)-carboxylate 14a**

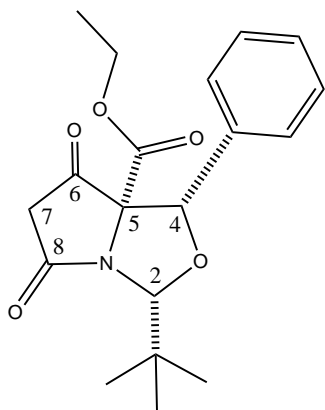

Yield (2.45 g, 94%); Red oil;  $\nu_{\max}/\text{cm}^{-1}$  2962 (C-H), 1720 (C=O), 1622 (C=O);  $\delta_{\text{H}}$  (400 MHz,  $\text{CDCl}_3$ ) 0.91 (3H, t,  $J=7.1$  Hz,  $\text{OCH}_2\text{CH}_3$ ), 1.09 (9H, s,  $\text{C}(\text{CH}_3)_3$ ), 3.22 (1H, d,  $J=20.5$  Hz, H7), 3.79 (1H, dd,  $J=0.9$  Hz, 20.5 Hz, H7), 3.90 (2H, m,  $\text{OCH}_2\text{CH}_3$ ), 4.96 (1H, s, H4), 5.16 (1H, d,  $J=0.9$  Hz, H2), 7.32-7.56 (5H, m, Ar-H);  $\delta_{\text{C}}$  (101 MHz,  $\text{CDCl}_3$ ) 13.5 ( $\text{OCH}_2\text{CH}_3$ ), 25.7 ( $(\text{CH}_3)_3$ ), 36.0 ( $\text{C}(\text{CH}_3)_3$ ), 46.1 (C7), 62.4 ( $\text{OCH}_2\text{CH}_3$ ), 80.4 (C4), 81.7 (C5), 96.9 (C2), 126.5 (Ar-C), 128.1 (Ar-C), 128.3 (Ar-C), 134.4 (Ar-C), 165.0 (C=O), 172.0 (C8), 198.1 (C6); LRMS (ESI<sup>-</sup>)  $m/z$ : 344.1 ( $[\text{M} - \text{H}]^-$  97%); LRMS (ESI<sup>+</sup>)  $m/z$ : 368.2 ( $[\text{M} + \text{Na}]^+$  100%); HRMS (ESI<sup>+</sup>)  $m/z$ :  $[\text{M} + \text{Na}]^+$  calcd. for  $\text{C}_{19}\text{H}_{23}\text{NO}_5\text{Na}$ , 368.1468, found 368.1470.

**Ethyl (1S\*,3R\*,7aR\*)-3-(tert-butyl)-5,7-dioxo-1-(p-tolyl)dihydro-1H,3H-pyrrolo[1,2-c]oxazole-7a(5H)-carboxylate 14b**

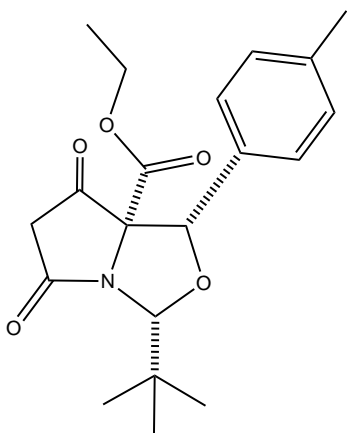

Yield (663 mg, 79%); Red oil;  $\nu_{\max}/\text{cm}^{-1}$  2976 (C-H), 1722 (C=O), 1620 (C=O);  $\delta_{\text{H}}$  (400 MHz,  $\text{CDCl}_3$ ) 0.95 (3H, t,  $J=7.2$  Hz,  $\text{OCH}_2\text{CH}_3$ ), 1.08 (9H, s,  $\text{C}(\text{CH}_3)_3$ ), 2.35 (3H, s,  $\text{CH}_3$ ), 3.22 (1H, d,  $J=20.6$  Hz, H7), 3.78 (1H, dd,  $J=0.9$  Hz, 20.6 Hz, H7), 3.91 (2H, m,  $\text{OCH}_2\text{CH}_3$ ), 4.92 (1H, s, H4), 5.15 (1H, d,  $J=0.8$  Hz, H2), 7.17 (2H, d,  $J=7.9$  Hz, Ar-H), 7.42 (2H, d,  $J=8.0$  Hz, Ar-H);  $\delta_{\text{C}}$  (101 MHz,  $\text{CDCl}_3$ ) 13.6 ( $\text{OCH}_2\text{CH}_3$ ), 21.4 ( $\text{CH}_3$ ), 25.7 ( $(\text{CH}_3)_3$ ), 36.0 ( $\text{C}(\text{CH}_3)_3$ ), 46.1 (C7), 62.4 ( $\text{OCH}_2\text{CH}_3$ ), 80.6 (C4), 81.6 (C5), 96.9 (C2), 126.5 (Ar-C), 128.7 (Ar-C), 131.3 (Ar-C), 138.1 (Ar-C), 164.9 (C=O), 172.3 (C8), 198.1 (C6); LRMS (ESI<sup>-</sup>)  $m/z$ : 358.1 ( $[\text{M} - \text{H}]^-$  100%); LRMS (ESI<sup>+</sup>)  $m/z$ : 382.2 ( $[\text{M} + \text{Na}]^+$  96%); HRMS (ESI<sup>+</sup>)  $m/z$ :  $[\text{M} - \text{H}]^-$  calcd. for  $\text{C}_{20}\text{H}_{24}\text{NO}_5$ , 358.1660, found 358.1658.

**Ethyl (1S\*,3R\*,7aR\*)-3-(tert-butyl)-1-(4-butylphenyl)-5,7-dioxodihydro-1H,3H-pyrrolo[1,2-c]oxazole-7a(5H)-carboxylate 14c**

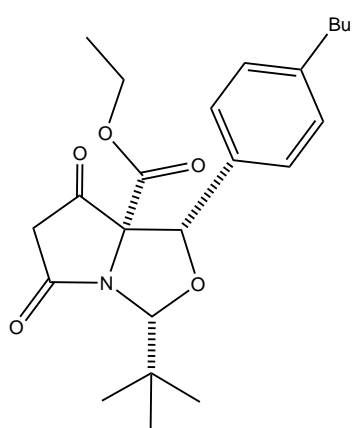

Yield (1.05 g, 78%); Yellow oil;  $\nu_{\max}/\text{cm}^{-1}$  2958 (C-H), 2931 (C-H), 2872 (C-H), 1721 (C=O), 1614 (C=O);  $\delta_{\text{H}}$  (400 MHz,  $\text{CDCl}_3$ ) 0.93 (6H, m,  $\text{CH}_3\text{CH}_2$ ,  $\text{OCH}_2\text{CH}_3$ ), 1.10 (9H, s,  $\text{C}(\text{CH}_3)_3$ ), 1.34 (2H, m,  $\text{CH}_2\text{CH}_3$ ), 1.60 (2H, m,  $\text{CH}_2\text{CH}_2$ ), 2.62 (2H, m,  $\text{CH}_2\text{CH}_2$ ), 3.23 (1H, d,  $J=20.6$  Hz, H7), 3.79 (1H, dd,  $J=1.0$  Hz, 20.5 Hz, H7), 3.91 (2H, m,  $\text{OCH}_2\text{CH}_3$ ), 4.94 (1H, s, H4), 5.16 (1H, d,  $J=0.9$  Hz, H2), 7.18 (2H, d,  $J=8.2$  Hz, Ar-H), 7.45 (2H, d,  $J=8.0$  Hz, Ar-H);  $\delta_{\text{C}}$  (101 MHz,  $\text{CDCl}_3$ ) 13.5 ( $\text{OCH}_2\text{CH}_3$ ), 14.1 ( $\text{CH}_3\text{CH}_2$ ), 22.4 ( $\text{CH}_2\text{CH}_2$ ), 25.7 ( $(\text{CH}_3)_3$ ), 33.7 ( $\text{CH}_2\text{CH}_2$ ), 35.5 ( $\text{CH}_2\text{CH}_2$ ), 36.0 ( $\text{C}(\text{CH}_3)_3$ ), 46.2 (C7), 62.3 ( $\text{OCH}_2\text{CH}_3$ ), 80.7 (C4), 81.8 (C5), 97.0 (C2), 126.5 (Ar-C), 128.1 (Ar-C), 131.5 (Ar-C), 143.1 (Ar-C), 165.0 (C=O), 172.1 (C8), 198.1 (C6); LRMS ( $\text{ESI}^-$ )  $m/z$ : 400.2 ( $[\text{M} - \text{H}]^-$  100%); LRMS ( $\text{ESI}^+$ )  $m/z$ : 424.2 ( $[\text{M} + \text{Na}]^+$  51%); HRMS ( $\text{ESI}^-$ )  $m/z$ :  $[\text{M} - \text{H}]^-$  calcd. for  $\text{C}_{23}\text{H}_{30}\text{NO}_5$ , 400.2129, found 400.2125.

**Ethyl (1S\*,3R\*,7aR\*)-3-(tert-butyl)-1-(4-methoxyphenyl)-5,7-dioxodihydro-1H,3H-pyrrolo[1,2-c]oxazole-7a(5H)-carboxylate 14d**

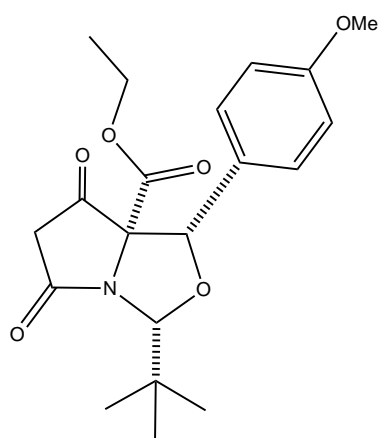

Yield (2.18 g, 80%); Red oil;  $\nu_{\max}/\text{cm}^{-1}$  2962 (C-H), 1722 (C=O), 1615 (C=O);  $\delta_{\text{H}}$  (400 MHz,  $\text{CDCl}_3$ ) 0.98 (3H, t,  $J=7.2$  Hz,  $\text{OCH}_2\text{CH}_3$ ), 1.09 (9H, s,  $\text{C}(\text{CH}_3)_3$ ), 3.22 (1H, d,  $J=20.5$  Hz, H7), 3.80 (1H, dd,  $J=0.9$  Hz, 20.5 Hz, H7), 3.82 (3H, s,  $\text{OCH}_3$ ), 3.93 (2H, m,  $\text{OCH}_2\text{CH}_3$ ), 4.91 (1H, s, H4), 5.15 (1H, d,  $J=0.8$  Hz, H2), 6.91 (2H, d,  $J=8.8$  Hz, Ar-H), 7.46 (2H, d,  $J=8.8$  Hz, Ar-H);  $\delta_{\text{C}}$  (101 MHz,  $\text{CDCl}_3$ ) 13.7 ( $\text{OCH}_2\text{CH}_3$ ), 25.7 ( $(\text{CH}_3)_3$ ), 36.0 ( $\text{C}(\text{CH}_3)_3$ ), 46.1 (C7), 55.4 ( $\text{OCH}_3$ ), 62.4 ( $\text{OCH}_2\text{CH}_3$ ), 80.5 (C4), 81.6 (C5), 96.9 (C2), 113.5 (Ar-C), 126.2 (Ar-C), 127.9 (Ar-C), 159.7 (Ar-C), 164.9 (C=O), 172.1 (C8), 198.2 (C6); LRMS ( $\text{ESI}^-$ )  $m/z$ : 374.1 ( $[\text{M} - \text{H}]^-$  100%); LRMS ( $\text{ESI}^+$ )  $m/z$ : 398.2 ( $[\text{M} + \text{Na}]^+$  96%); HRMS ( $\text{ESI}^-$ )  $m/z$ :  $[\text{M} - \text{H}]^-$  calcd. for  $\text{C}_{20}\text{H}_{24}\text{NO}_6$ , 374.1609, found 374.1606.

**Ethyl (1S\*,3R\*,7aR\*)-3-(tert-butyl)-1-(4-fluorophenyl)-5,7-dioxodihydro-1H,3H-pyrrolo[1,2-c]oxazole-7a(5H)-carboxylate 14e**



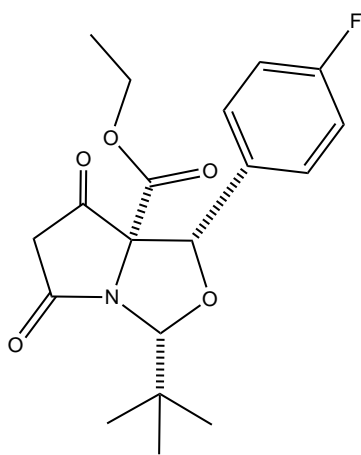

Yield (723 mg, 82%); Orange oil;  $\nu_{\max}/\text{cm}^{-1}$  2963 (C-H), 1720 (C=O), 1606 (C=O);  $\delta_{\text{H}}$  (400 MHz,  $\text{CDCl}_3$ ) 0.97 (3H, t,  $J=7.1$  Hz,  $\text{OCH}_2\text{CH}_3$ ), 1.07 (9H, s,  $\text{C}(\text{CH}_3)_3$ ), 3.22 (1H, d,  $J=20.6$  Hz, H7), 3.80 (1H, d,  $J=20.6$  Hz, H7), 3.94 (2H, m,  $\text{OCH}_2\text{CH}_3$ ), 4.92 (1H, s, H4), 5.16 (1H, s, H2), 7.06 (2H, app t,  $J=8.6$  Hz, Ar-H), 7.53 (2H, dd,  $J=5.4$  Hz, 8.4 Hz, Ar-H);  $\delta_{\text{C}}$  (101 MHz,  $\text{CDCl}_3$ ) 13.6 ( $\text{OCH}_2\text{CH}_3$ ), 25.6 ( $(\text{CH}_3)_3$ ), 36.0 ( $\text{C}(\text{CH}_3)_3$ ), 46.1 (C7), 62.5 ( $\text{OCH}_2\text{CH}_3$ ), 79.9 (C4), 81.4 (C5), 96.9 (C2), 115.0 (d,  $J=21.6$  Hz, Ar-C), 128.3 (d,  $J=8.2$  Hz, Ar-C), 130.1 (d,  $J=3.3$  Hz, Ar-C), 163.1 (d,

$J=246.7$  Hz, Ar-C), 164.9 (C=O), 172.1 (C8), 198.2 (C6);  $\delta_{\text{F}}$  (377 MHz,  $\text{CDCl}_3$ ) -113.84; LRMS ( $\text{ESI}^-$ )  $m/z$ : 362.1 ( $[\text{M} - \text{H}]^-$  98%); LRMS ( $\text{ESI}^+$ )  $m/z$ : 386.0 ( $[\text{M} + \text{Na}]^+$  38%); HRMS ( $\text{ESI}^-$ )  $m/z$ :  $[\text{M} - \text{H}]^-$  calcd. for  $\text{C}_{19}\text{H}_{21}\text{NO}_5\text{F}$ , 362.1409, found 362.1408.

**Ethyl (1S\*,3R\*,7aR\*)-3-(tert-butyl)-1-(4-chlorophenyl)-5,7-dioxodihydro-1H,3H-pyrrolo[1,2-c]oxazole-7a(5H)-carboxylate 14f**

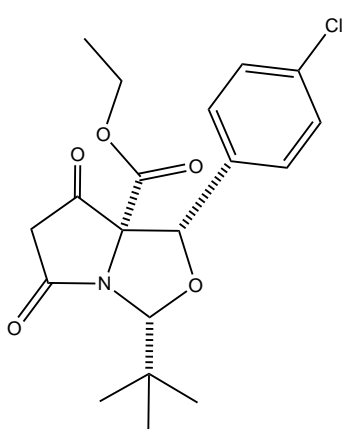

Yield (1.19 g, 86%); Orange oil;  $\nu_{\max}/\text{cm}^{-1}$  2961 (C-H), 1720 (C=O), 1622 (C=O);  $\delta_{\text{H}}$  (400 MHz,  $\text{CDCl}_3$ ) 0.98 (3H, t,  $J=7.1$  Hz,  $\text{OCH}_2\text{CH}_3$ ), 1.06 (9H, s,  $\text{C}(\text{CH}_3)_3$ ), 3.23 (1H, d,  $J=20.7$  Hz, H7), 3.80 (1H, dd,  $J=0.9$  Hz, 20.7 Hz, H7), 3.95 (2H, m,  $\text{OCH}_2\text{CH}_3$ ), 4.90 (1H, s, H4), 5.16 (1H, d,  $J=0.9$  Hz, H2), 7.34 (2H, d,  $J=8.5$  Hz, Ar-H), 7.49 (2H, d,  $J=8.5$  Hz, Ar-H);  $\delta_{\text{C}}$  (101 MHz,  $\text{CDCl}_3$ ) 13.7 ( $\text{OCH}_2\text{CH}_3$ ), 25.6 ( $(\text{CH}_3)_3$ ), 36.0 ( $\text{C}(\text{CH}_3)_3$ ), 46.0 (C7), 62.6 ( $\text{OCH}_2\text{CH}_3$ ), 79.7 (C4), 81.3 (C5), 96.9 (C2), 127.9 (Ar-C), 128.3 (Ar-C), 133.0 (Ar-C), 134.1 (Ar-C), 164.8 (C=O), 172.0 (C8), 198.2 (C6); LRMS

( $\text{ESI}^-$ )  $m/z$ : 378.0 ( $[\text{M}^{35} - \text{H}]^-$  100%), 380.1 ( $[\text{M}^{37} - \text{H}]^-$  36%); LRMS ( $\text{ESI}^+$ )  $m/z$ : 402.0 ( $[\text{M}^{35} + \text{Na}]^+$  40%), 404.0 ( $[\text{M}^{37} + \text{Na}]^+$  7%); HRMS ( $\text{ESI}^-$ )  $m/z$ :  $[\text{M}^{35} - \text{H}]^-$  calcd. for  $\text{C}_{19}\text{H}_{21}\text{NO}_5\text{Cl}$ , 378.1114, found 378.1112;  $[\text{M}^{37} - \text{H}]^-$  calcd. for  $\text{C}_{19}\text{H}_{21}\text{NO}_5\text{Cl}$ , 380.1085, found 380.1083.

**Ethyl (1S\*,3R\*,7aR\*)-1-(4-bromophenyl)-3-(tert-butyl)-5,7-dioxodihydro-1H,3H-pyrrolo[1,2-c]oxazole-7a(5H)-carboxylate 14g**

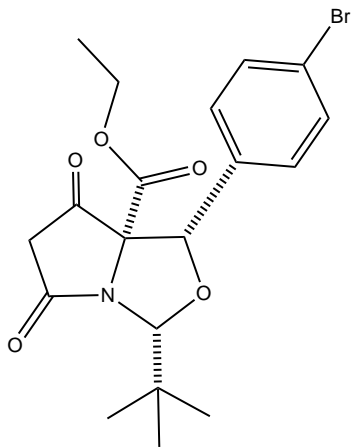

Yield (468 mg, 85%); Yellow oil;  $\nu_{\max}/\text{cm}^{-1}$  2973 (C-H), 1721 (C=O), 1623 (C=O);  $\delta_{\text{H}}$  (400 MHz,  $\text{CDCl}_3$ ) 0.99 (3H, t,  $J=7.2$  Hz,  $\text{OCH}_2\text{CH}_3$ ), 1.06 (9H, s,  $\text{C}(\text{CH}_3)_3$ ), 3.23 (1H, d,  $J=20.7$  Hz, H7), 3.81 (1H, dd,  $J=0.8$  Hz, 20.7 Hz, H7), 3.95 (2H, m,  $\text{OCH}_2\text{CH}_3$ ), 4.88 (1H, s, H4), 5.16 (1H, d,  $J=0.8$  Hz, H2), 7.44 (2H, d,  $J=8.6$  Hz, Ar-H), 7.50 (2H, d,  $J=8.6$  Hz, Ar-H);  $\delta_{\text{C}}$  (101 MHz,  $\text{CDCl}_3$ ) 13.7 ( $\text{OCH}_2\text{CH}_3$ ), 25.6 ( $(\text{CH}_3)_3$ ), 36.0 ( $\text{C}(\text{CH}_3)_3$ ), 46.0 (C7), 62.6 ( $\text{OCH}_2\text{CH}_3$ ), 79.8 (C4), 81.2 (C5), 96.9 (C2), 122.3 (Ar-C), 128.3 (Ar-C), 131.2 (Ar-C), 133.5 (Ar-C), 164.9 (C=O), 172.0 (C8), 198.2 (C6); LRMS (ESI<sup>-</sup>)  $m/z$ : 422.0 ( $[\text{M}^{79} - \text{H}]^-$  100%), 424.0 ( $[\text{M}^{81} - \text{H}]^-$  100%); HRMS (ESI<sup>-</sup>)  $m/z$ :  $[\text{M}^{79} - \text{H}]^-$  calcd. for  $\text{C}_{19}\text{H}_{21}\text{NO}_5\text{Br}$ , 422.0609, found 422.0604;  $[\text{M}^{81} - \text{H}]^-$  calcd. for  $\text{C}_{19}\text{H}_{21}\text{NO}_5\text{Br}$ , 424.0589, found 424.0584.

**Ethyl (1S\*,3R\*,7aR\*)-3-(tert-butyl)-1-(4-cyanophenyl)-5,7-dioxodihydro-1H,3H-pyrrolo[1,2-c]oxazole-7a(5H)-carboxylate 14h**

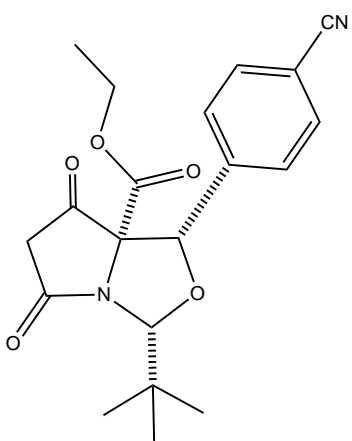

Yield (405 mg, 92%); Yellow oil that solidified overnight; m.p. 164-168°C;  $\nu_{\max}/\text{cm}^{-1}$  2973 (C-H), 2229 ( $\text{C}\equiv\text{N}$ ), 1722 (C=O), 1612 (C=O);  $\delta_{\text{H}}$  (400 MHz,  $\text{CDCl}_3$ ) 1.00 (3H, t,  $J=7.2$  Hz,  $\text{OCH}_2\text{CH}_3$ ), 1.04 (9H, s,  $\text{C}(\text{CH}_3)_3$ ), 3.26 (1H, d,  $J=20.9$  Hz, H7), 3.84 (1H, dd,  $J=0.7$  Hz, 20.8 Hz, H7), 3.97 (2H, dq,  $J=4.1$  Hz, 7.1 Hz,  $\text{OCH}_2\text{CH}_3$ ), 4.95 (1H, s, H4), 5.19 (1H, d,  $J=0.8$  Hz, H2), 7.66 (2H, d,  $J=8.8$  Hz, Ar-H), 7.70 (2H, d,  $J=8.3$  Hz, Ar-H);  $\delta_{\text{C}}$  (101 MHz,  $\text{CDCl}_3$ ) 13.7 ( $\text{OCH}_2\text{CH}_3$ ), 25.4 ( $(\text{CH}_3)_3$ ), 36.0 ( $\text{C}(\text{CH}_3)_3$ ), 45.8 (C7), 62.8 ( $\text{OCH}_2\text{CH}_3$ ), 79.1 (C4), 80.9 (C5), 96.8 (C2), 111.9 (Ar-C), 118.8 ( $\text{C}\equiv\text{N}$ ), 127.2 (Ar-C), 131.9 (Ar-C), 139.9 (Ar-C), 164.7 (C=O), 171.9 (C8), 198.2 (C6); LRMS (ESI<sup>-</sup>)  $m/z$ : 369.1 ( $[\text{M} - \text{H}]^-$  97%); HRMS (ESI<sup>-</sup>)  $m/z$ :  $[\text{M} - \text{H}]^-$  calcd. for  $\text{C}_{20}\text{H}_{21}\text{N}_2\text{O}_5$ , 369.1456, found 369.1451.

**Ethyl (1S\*,3R\*,7aR\*)-3-(tert-butyl)-5,7-dioxo-1-(4-(trifluoromethyl)phenyl)dihydro-1H,3H-pyrrolo[1,2-c]oxazole-7a(5H)-carboxylate 14i**

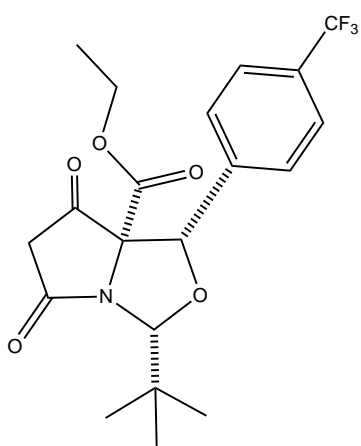

Yield (401 mg, 84%); Yellow oil;  $\nu_{\max}/\text{cm}^{-1}$  2974 (C-H), 1724 (C=O), 1622 (C=O);  $\delta_{\text{H}}$  (400 MHz,  $\text{CDCl}_3$ ) 0.95 (3H, t,  $J=7.1$  Hz,  $\text{OCH}_2\text{CH}_3$ ), 1.07 (9H, s,  $\text{C}(\text{CH}_3)_3$ ), 3.26 (1H, d,  $J=20.7$  Hz, H7), 3.84 (1H, dd,  $J=0.7$  Hz, 20.7 Hz, H7), 3.93 (2H, m,  $\text{OCH}_2\text{CH}_3$ ), 4.97 (1H, s, H4), 5.20 (1H, d,  $J=0.8$  Hz, H2), 7.63 (2H, d,  $J=8.3$  Hz, Ar-H), 7.70 (2H, d,  $J=8.5$  Hz, Ar-H);  $\delta_{\text{C}}$  (101 MHz,  $\text{CDCl}_3$ ) 13.5 ( $\text{OCH}_2\text{CH}_3$ ), 25.5 ( $(\text{CH}_3)_3$ ), 36.0 ( $\text{C}(\text{CH}_3)_3$ ), 46.0 (C7), 62.7 ( $\text{OCH}_2\text{CH}_3$ ), 79.5 (C4), 81.2 (C5), 96.9 (C2), 125.0 (q,  $J=3.8$  Hz, Ar-C), 126.9 (Ar-C), 130.4 (d,  $J=32.6$  Hz, Ar-C), 138.6 (Ar-

C), 164.9 (C=O), 171.9 (C8), 198.2 (C6);  $\delta_{\text{F}}$  (376 MHz,  $\text{CDCl}_3$ ) -62.61; LRMS (ESI<sup>-</sup>)  $m/z$ : 412.1 ( $[\text{M} - \text{H}]^-$  100%); HRMS (ESI<sup>+</sup>)  $m/z$ :  $[\text{M} + \text{H}]^+$  calcd. for  $\text{C}_{20}\text{H}_{23}\text{NO}_5\text{F}_3$ , 414.1523, found 414.1522.

**Ethyl (1S\*,3R\*,7aR\*)-3-(tert-butyl)-1-(4-nitrophenyl)-5,7-dioxodihydro-1H,3H-pyrrolo[1,2-c]oxazole-7a(5H)-carboxylate 14j**

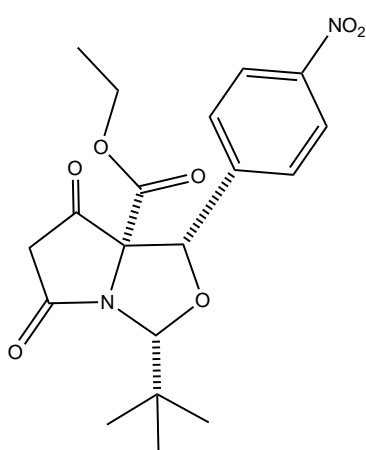

Yield (410 mg, 86%); Orange foamy solid; m.p. 182-185°C;  $\nu_{\max}/\text{cm}^{-1}$  2974 (C-H), 1723 (C=O), 1606 (C=O), 1523 (N-O);  $\delta_{\text{H}}$  (400 MHz,  $\text{CDCl}_3$ ) 1.02 (3H, t,  $J=7.1$  Hz,  $\text{OCH}_2\text{CH}_3$ ), 1.05 (9H, s,  $\text{C}(\text{CH}_3)_3$ ), 3.28 (1H, d,  $J=20.9$  Hz, H7), 3.86 (1H, dd,  $J=0.6$  Hz, 20.9 Hz, H7), 3.98 (2H, dq,  $J=2.2$  Hz, 7.1 Hz,  $\text{OCH}_2\text{CH}_3$ ), 4.99 (1H, s, H4), 5.21 (1H, d,  $J=0.8$  Hz, H2), 7.76 (2H, d,  $J=9.0$  Hz, Ar-H), 8.23 (2H, d,  $J=9.0$  Hz, Ar-H);  $\delta_{\text{C}}$  (101 MHz,  $\text{CDCl}_3$ ) 13.7 ( $\text{OCH}_2\text{CH}_3$ ), 25.4 ( $(\text{CH}_3)_3$ ), 36.0 ( $\text{C}(\text{CH}_3)_3$ ), 45.8 (C7), 62.8 ( $\text{OCH}_2\text{CH}_3$ ), 79.0 (C4), 80.9 (C5), 96.9 (C2), 123.3 (Ar-C), 127.4

(Ar-C), 141.9 (Ar-C), 147.7 (Ar-C), 164.7 (C=O), 172.0 (C8), 198.2 (C6); LRMS (ESI<sup>-</sup>)  $m/z$ : 389.1 ( $[\text{M} - \text{H}]^-$  98%); HRMS (ESI<sup>+</sup>)  $m/z$ :  $[\text{M} + \text{H}]^+$  calcd. for  $\text{C}_{19}\text{H}_{23}\text{N}_2\text{O}_7$ , 391.1500, found 391.1501.

**Ethyl (1S\*,3R\*,7aR\*)-3-(tert-butyl)-1-(3-methoxyphenyl)-5,7-dioxodihydro-1H,3H-pyrrolo[1,2-c]oxazole-7a(5H)-carboxylate 14k**

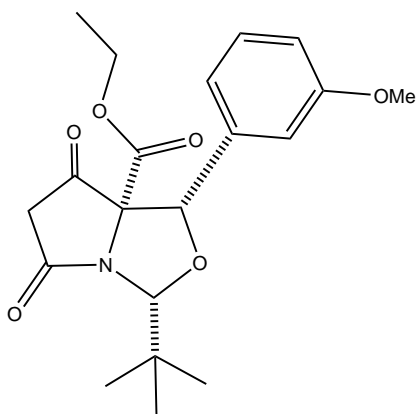

Yield (355 mg, 79%); Orange oil;  $\nu_{\max}/\text{cm}^{-1}$  2962 (C-H), 1721 (C=O), 1606 (C=O);  $\delta_{\text{H}}$  (400 MHz,  $\text{CDCl}_3$ ) 0.94 (3H, t,  $J=7.1$  Hz,  $\text{OCH}_2\text{CH}_3$ ), 1.08 (9H, s,  $\text{C}(\text{CH}_3)_3$ ), 3.22 (1H, d,  $J=20.6$  Hz, H7), 3.77 (1H, m, H7), 3.82 (3H, s,  $\text{OCH}_3$ ), 3.92 (2H, m,  $\text{OCH}_2\text{CH}_3$ ), 4.93 (1H, s, H4), 5.16 (1H, d,  $J=0.8$  Hz, H2), 6.86 (1H, m, Ar-H), 7.14 (2H, m, Ar-H), 7.29 (1H, m, Ar-H);  $\delta_{\text{C}}$  (101 MHz,  $\text{CDCl}_3$ ) 13.6 ( $\text{OCH}_2\text{CH}_3$ ), 25.7 ( $(\text{CH}_3)_3$ ), 36.0 ( $\text{C}(\text{CH}_3)_3$ ), 46.2 (C7), 55.3 ( $\text{OCH}_3$ ), 62.4 ( $\text{OCH}_2\text{CH}_3$ ), 80.2 (C4), 81.7 (C5), 96.9 (C2), 112.3 (Ar-C), 113.7 (Ar-C), 118.9

(Ar-C), 129.2 (Ar-C), 136.0 (Ar-C), 159.4 (Ar-C), 165.0 (C=O), 172.0 (C8), 198.0 (C6); LRMS (ESI<sup>-</sup>)  $m/z$ : 374.1 ( $[\text{M} - \text{H}]^-$  96%); HRMS (ESI<sup>-</sup>)  $m/z$ :  $[\text{M} - \text{H}]^-$  calcd. for  $\text{C}_{20}\text{H}_{24}\text{NO}_6$ , 374.1609, found 374.1605.

**Ethyl (1S\*,3R\*,7aR\*)-3-(tert-butyl)-1-(3-chlorophenyl)-5,7-dioxodihydro-1H,3H-pyrrolo[1,2-c]oxazole-7a(5H)-carboxylate 14l**

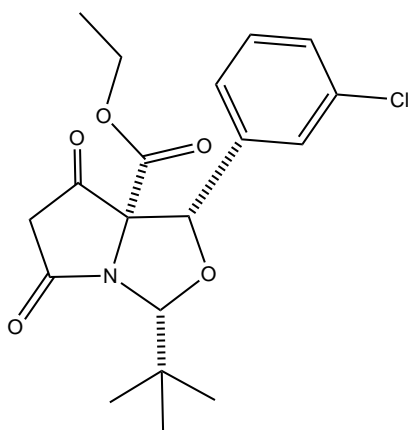

Yield (446 mg, 86%); Yellow oil;  $\nu_{\max}/\text{cm}^{-1}$  2962 (C-H), 2909 (C-H), 2874 (C-H), 1719 (C=O), 1657 (C=O);  $\delta_{\text{H}}$  (400 MHz,  $\text{CDCl}_3$ ) 0.97 (3H, t,  $J=7.2$  Hz,  $\text{OCH}_2\text{CH}_3$ ), 1.07 (9H, s,  $\text{C}(\text{CH}_3)_3$ ), 3.23 (1H, d,  $J=20.6$  Hz, H7), 3.82 (1H, dd,  $J=0.8$  Hz, 20.7 Hz, H7), 3.95 (2H, m,  $\text{OCH}_2\text{CH}_3$ ), 4.90 (1H, s, H4), 5.16 (1H, d,  $J=0.9$  Hz, H2), 7.30 (2H, m, Ar-H), 7.45 (1H, m, Ar-H), 7.55 (1H, m, Ar-H);  $\delta_{\text{C}}$  (101 MHz,  $\text{CDCl}_3$ ) 13.6 ( $\text{OCH}_2\text{CH}_3$ ), 25.6 ( $(\text{CH}_3)_3$ ), 36.0 ( $\text{C}(\text{CH}_3)_3$ ), 46.0 (C7), 62.6 ( $\text{OCH}_2\text{CH}_3$ ), 79.5 (C4), 81.3 (C5), 96.9 (C2), 124.8 (Ar-C), 126.7 (Ar-C),

128.4 (Ar-C), 129.4 (Ar-C), 134.1 (Ar-C), 136.6 (Ar-C), 164.9 (C=O), 171.9 (C8), 198.1 (C6); LRMS (ESI<sup>-</sup>)  $m/z$ : 378.1 ( $[\text{M}^{35} - \text{H}]^-$  47%), 380.1 ( $[\text{M}^{37} - \text{H}]^-$  15%); HRMS (ESI<sup>-</sup>)  $m/z$ :  $[\text{M}^{35} - \text{H}]^-$  calcd. for  $\text{C}_{19}\text{H}_{21}\text{NO}_5\text{Cl}$ , 378.1114, found 378.1106;  $[\text{M}^{37} - \text{H}]^-$  calcd. for  $\text{C}_{19}\text{H}_{21}\text{NO}_5\text{Cl}$ , 380.1085, found 380.1076.

**Ethyl (1S\*,3R\*,7aR\*)-1-(3-bromophenyl)-3-(tert-butyl)-5,7-dioxodihydro-1H,3H-pyrrolo[1,2-c]oxazole-7a(5H)-carboxylate 14m**

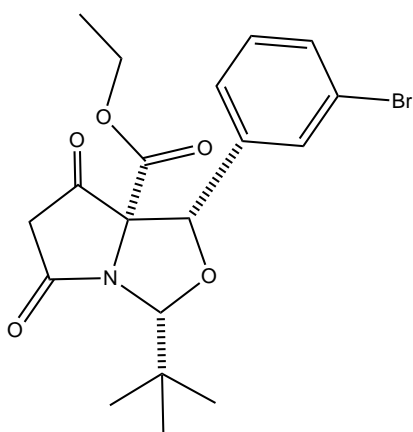

Yield (432 mg, 76%); Orange oil;  $\nu_{\max}/\text{cm}^{-1}$  2962 (C-H), 2908 (C-H), 2873 (C-H), 1718 (C=O), 1657 (C=O);  $\delta_{\text{H}}$  (400 MHz,  $\text{CDCl}_3$ ) 0.97 (3H, t,  $J=7.1$  Hz,  $\text{OCH}_2\text{CH}_3$ ), 1.07 (9H, s,  $\text{C}(\text{CH}_3)_3$ ), 3.22 (1H, d,  $J=20.6$  Hz, H7), 3.82 (1H, dd,  $J=0.6$  Hz, 20.5 Hz, H7), 3.95 (2H, m,  $\text{OCH}_2\text{CH}_3$ ), 4.89 (1H, s, H4), 5.16 (1H, d,  $J=0.8$  Hz, H2), 7.24 (1H, m, Ar-H), 7.47 (2H, m, Ar-H), 7.70 (1H, m, Ar-H);  $\delta_{\text{C}}$  (101 MHz,  $\text{CDCl}_3$ ) 13.6 ( $\text{OCH}_2\text{CH}_3$ ), 25.6 ( $(\text{CH}_3)_3$ ), 36.0 ( $\text{C}(\text{CH}_3)_3$ ), 46.0 (C7), 62.6 ( $\text{OCH}_2\text{CH}_3$ ), 79.4 (C4), 81.3 (C5), 96.9 (C2), 122.2 (Ar-C), 125.2 (Ar-C),

129.6 (Ar-C), 129.6 (Ar-C), 131.3 (Ar-C), 136.8 (Ar-C), 164.9 (C=O), 171.9 (C8), 198.0 (C6); LRMS (ESI<sup>-</sup>)  $m/z$ : 422.1 ( $[\text{M}^{79} - \text{H}]^-$  31%), 424.1 ( $[\text{M}^{81} - \text{H}]^-$  35%); HRMS (ESI<sup>-</sup>)  $m/z$ :  $[\text{M}^{79} - \text{H}]^-$  calcd. for  $\text{C}_{19}\text{H}_{21}\text{NO}_5\text{Br}$ , 422.0609, found 422.0606;  $[\text{M}^{81} - \text{H}]^-$  calcd. for  $\text{C}_{19}\text{H}_{21}\text{NO}_5\text{Br}$ , 424.0589, found 424.0585.

**Ethyl (1*S*\*,3*R*\*,7*aR*\*)-3-(*tert*-butyl)-7-hydroxy-6-methyl-5-oxo-1-phenyl-1*H*,3*H*-pyrrolo[1,2-*c*]oxazole-7*a*(5*H*)-carboxylate 21a**

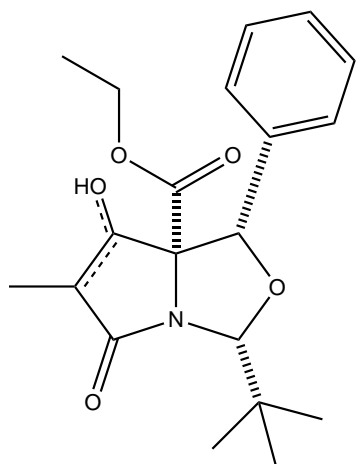

Yield (1.57 g, 62%); Off-white solid;  $\nu_{\max}/\text{cm}^{-1}$  2963 (C-H), 1758 (C=O), 1658 (C=O), 1623 (C=C); 38:35:27 enol:keto(major):keto(minor) tautomers;  $\delta_{\text{H}}$  (400 MHz,  $\text{CDCl}_3$ ) 0.85 (3H, t,  $J=7.1$  Hz,  $\text{OCH}_2\text{CH}_3$ -keto(minor)), 1.11 (9H, s,  $\text{C}(\text{CH}_3)_3$ -keto(minor+major)), 1.14 (3H, t,  $J=7.1$  Hz,  $\text{OCH}_2\text{CH}_3$ , underneath  $\text{C}(\text{CH}_3)_3$  peak-keto(major)), 1.16 (9H, s,  $\text{C}(\text{CH}_3)_3$ -enol), 1.28 (3H, t,  $J=7.1$  Hz,  $\text{OCH}_2\text{CH}_3$ -enol), 1.32 (3H, d,  $J=7.2$  Hz,  $\text{CH}_3$ -keto(minor)), 1.44 (3H, d,  $J=7.3$  Hz,  $\text{CH}_3$ -keto(major)), 1.74 (3H, s,  $\text{CH}_3$ -enol), 3.46 (1H, q,  $J=7.3$  Hz, H7-keto(major)), 3.69 (1H, dq,  $J=1.0$  Hz, 7.2 Hz, H7-keto(minor)), 3.81 (1H, m,

$\text{OCH}_2\text{CH}_3$ -keto(minor)), 3.88 (1H, m,  $\text{OCH}_2\text{CH}_3$ -keto(minor)), 3.96 (1H, dq,  $J=7.2$  Hz, 10.9 Hz,  $\text{OCH}_2\text{CH}_3$ -keto(major)), 4.07 (1H, dq,  $J=7.1$  Hz, 10.8 Hz,  $\text{OCH}_2\text{CH}_3$ -keto(major)), 4.21 (2H, dq,  $J=0.6$  Hz, 7.1 Hz,  $\text{OCH}_2\text{CH}_3$ ), 4.69 (1H, s, H4-keto(major)), 4.80 (1H, s, H2-keto(major)), 4.89 (1H, s, H4-keto(minor)), 5.12 (1H, d,  $J=1.0$  Hz, H2-keto(minor)), 7.28-7.60 (10H, m, Ar-H);  $\delta_{\text{C}}$  (101 MHz,  $\text{CDCl}_3$ ) 6.3 ( $\text{CH}_3$ -enol), 7.3 ( $\text{CH}_3$ -keto(minor)), 13.5 ( $\text{OCH}_2\text{CH}_3$ ), 13.7 ( $\text{CH}_3$ -keto(major)), 13.8 ( $\text{OCH}_2\text{CH}_3$ ), 14.1 ( $\text{OCH}_2\text{CH}_3$ ), 25.8 ( $(\text{CH}_3)_3$ ), 26.2 ( $(\text{CH}_3)_3$ ), 35.5 ( $\text{C}(\text{CH}_3)_3$ ), 36.1 ( $\text{C}(\text{CH}_3)_3$ ), 45.9 (C7-keto(major)), 50.5 (C7-keto(minor)), 61.8 ( $\text{OCH}_2\text{CH}_3$ ), 62.3 ( $\text{OCH}_2\text{CH}_3$ ), 62.9 ( $\text{OCH}_2\text{CH}_3$ ), 76.0 (C5), 80.7 (C5), 81.0 (C4-keto(minor)), 86.1 (C4-keto(major)), 97.0 (C2-keto(minor)), 97.8 (C2-keto(major)), 105.6 (C7-enol), 126.3 (Ar-C), 126.6 (Ar-C), 128.1 (Ar-C), 128.4 (Ar-C), 128.6 (Ar-C), 129.0 (Ar-

C), 134.5 (Ar-C), 134.8 (Ar-C), 165.1 (C=O), 166.3 (C=O), 168.7 (C=O), 170.2 (C=O), 174.6 (C=O), 174.9 (C=O), 180.9 (C6<sub>-enol</sub>), 200.6 (C6<sub>-keto</sub>); LRMS (ESI<sup>+</sup>) *m/z*: 382.2 ([M + Na]<sup>+</sup> 77%); LRMS (ESI<sup>-</sup>) *m/z*: 358.1 ([M - H]<sup>-</sup> 100%); HRMS (ESI<sup>+</sup>) *m/z*: [M + H]<sup>+</sup> calcd. for C<sub>20</sub>H<sub>26</sub>NO<sub>5</sub>, 360.1805, found 360.1806.

**Ethyl (1S\*,3R\*,7aR\*)-3-(tert-butyl)-7-hydroxy-5-oxo-1,6-diphenyl-1H,3H-pyrrolo[1,2-c]oxazole-7a(5H)-carboxylate 21b**

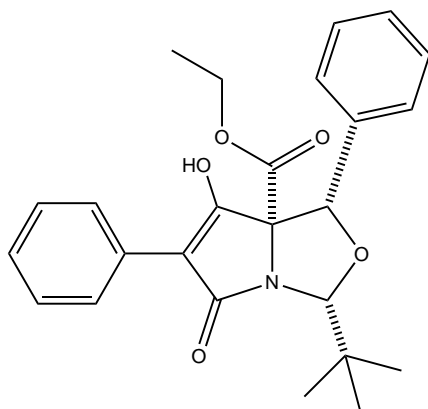

Yield (103 mg, 10%); Pale-yellow oil;  $\nu_{\max}/\text{cm}^{-1}$  2976 (C-H), 1703 (C=O), 1648 (C=O), 1600 (C=C);  $\delta_{\text{H}}$  (400 MHz, CDCl<sub>3</sub>) 1.22 (3H, t, *J*=7.2 Hz, OCH<sub>2</sub>CH<sub>3</sub>), 1.26 (9H, s, C(CH<sub>3</sub>)<sub>3</sub>), 4.14 (2H, m, OCH<sub>2</sub>CH<sub>3</sub>), 4.84 (1H, s, H4), 4.93 (1H, s, H2), 7.30-7.47 (8H, m, Ar-H), 8.00 (2H, m, Ar-H);  $\delta_{\text{C}}$  (101 MHz, CDCl<sub>3</sub>) 13.8 (OCH<sub>2</sub>CH<sub>3</sub>), 26.4 ((CH<sub>3</sub>)<sub>3</sub>), 35.6 (C(CH<sub>3</sub>)<sub>3</sub>), 63.3 (OCH<sub>2</sub>CH<sub>3</sub>), 75.4 (C5), 86.6 (C4), 98.6 (C2), 107.7 (C7), 126.2 (Ar-C), 127.7 (Ar-C), 128.0 (Ar-

C), 128.3 (Ar-C), 128.8 (Ar-C), 129.4 (Ar-C), 134.5 (Ar-C), 165.7 (C=O), 169.1 (C8), 178.4 (C6); LRMS (ESI<sup>-</sup>) *m/z*: 420.1 ([M - H]<sup>-</sup> 94%); HRMS (ESI<sup>-</sup>) *m/z*: [M - H]<sup>-</sup> calcd. for C<sub>25</sub>H<sub>26</sub>NO<sub>5</sub>, 420.1816, found 420.1820.

**General procedure for the synthesis of C7-butyl ester tetramic acids 22:**<sup>20</sup>

To a solution of tetramate **14a-f** (1.0 eq.) in anhydrous DCM was added DMAP (1.2 eq.) and butyl chloroformate (1.2 eq.) and the reaction mixture was refluxed overnight. The reaction mixture was then washed with 2 M HCl (aq.), brine, dried over Na<sub>2</sub>SO<sub>4</sub>, filtered and concentrated *in-vacuo* and subsequently purified by flash column chromatography to obtain metal-chelated tetramic acids. The tetramic acids were then re-dissolved in EtOAc, washed with 10% citric acid solution (aq.), dried over Na<sub>2</sub>SO<sub>4</sub>, filtered, and concentrated *in-vacuo* to obtain C7-butyl ester tetramic acids **22a-f**.

**6-Butyl 7a-ethyl (1S\*,3R\*,7aR\*)-3-(tert-butyl)-7-hydroxy-5-oxo-1-phenyl-1H,3H-pyrrolo[1,2-c]oxazole-6,7a(5H)-dicarboxylate 22a**

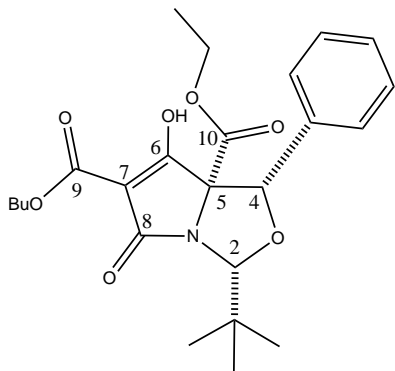

Yield (603 mg, 26%); Red oil;  $R_f$  (100% EtOAc) 0.48;  $\nu_{\max}/\text{cm}^{-1}$  2961 (C-H), 1730 (C=O), 1626 (C=O);  $\delta_{\text{H}}$  (400 MHz,  $\text{CDCl}_3$ ) 0.98 (6H, m,  $\text{CH}_2\text{CH}_3$ ,  $\text{OCH}_2\text{CH}_3$ ), 1.08 (9H, s,  $\text{C}(\text{CH}_3)_3$ ), 1.47 (2H, m,  $\text{CH}_2\text{CH}_3$ ), 1.78 (2H, m,  $\text{OCH}_2\text{CH}_2$ ), 3.96 (2H, m,  $\text{OCH}_2\text{CH}_3$ ), 4.37 (2H, m,  $\text{OCH}_2\text{CH}_2$ ), 4.81 (1H, s, H4), 4.91 (1H, s, H2), 7.33-7.55 (5H, m, Ar-H);  $\delta_{\text{C}}$  (101 MHz,  $\text{CDCl}_3$ ) 13.7 ( $\text{OCH}_2\text{CH}_3$ ), 13.8 ( $\text{CH}_2\text{CH}_3$ ), 19.2 ( $\text{CH}_2\text{CH}_3$ ), 25.5 ( $(\text{CH}_3)_3$ ), 30.6 ( $\text{OCH}_2\text{CH}_2$ ), 35.6 ( $\text{C}(\text{CH}_3)_3$ ), 62.2 ( $\text{OCH}_2\text{CH}_3$ ), 66.0 ( $\text{OCH}_2\text{CH}_2$ ), 74.9 (C5), 82.9 (C4), 97.1 (C2), 100.4 (C7), 126.5 (Ar-C), 128.0 (Ar-C), 128.3 (Ar-C), 134.6 (Ar-C), 164.5 (C10), 167.5 (C9), 172.1 (C8), 184.9 (C6); LRMS ( $\text{ESI}^-$ )  $m/z$ : 444.1 ( $[\text{M} - \text{H}]^-$  100%); LRMS ( $\text{ESI}^+$ )  $m/z$ : 468.2 ( $[\text{M} + \text{Na}]^+$  95%); HRMS ( $\text{ESI}^-$ )  $m/z$ :  $[\text{M} - \text{H}]^-$  calcd. for  $\text{C}_{24}\text{H}_{30}\text{NO}_7$ , 444.2028, found 444.2027.

**6-Butyl 7a-ethyl (1S\*,3R\*,7aR\*)-3-(tert-butyl)-7-hydroxy-5-oxo-1-(p-tolyl)-1H,3H-pyrrolo[1,2-c]oxazole-6,7a(5H)-dicarboxylate 22b**

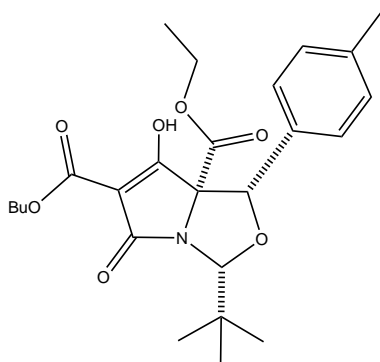

Yield (138 mg, 17%); Orange oil;  $R_f$  (100% EtOAc) 0.50;  $\nu_{\max}/\text{cm}^{-1}$  2961 (C-H), 1732 (C=O), 1657 (C=O), 1626 (C=C);  $\delta_{\text{H}}$  (400 MHz,  $\text{CDCl}_3$ ) 0.97 (3H, t,  $J=7.4$  Hz,  $\text{OCH}_2\text{CH}_3$ ), 1.03 (3H, m,  $\text{CH}_2\text{CH}_3$ ), 1.07 (9H, s,  $\text{C}(\text{CH}_3)_3$ ), 1.47 (2H, m,  $\text{CH}_2\text{CH}_3$ ), 1.78 (2H, m,  $\text{OCH}_2\text{CH}_2$ ), 2.36 (3H, s,  $\text{CH}_3$ ), 3.98 (2H, m,  $\text{OCH}_2\text{CH}_3$ ), 4.37 (2H, m,  $\text{OCH}_2\text{CH}_2$ ), 4.77 (1H, s, H4), 4.90 (1H, s, H2), 7.18 (2H, d,  $J=7.9$  Hz, Ar-H), 7.41 (2H, d,  $J=8.0$  Hz, Ar-H);  $\delta_{\text{C}}$  (101 MHz,  $\text{CDCl}_3$ ) 13.8 ( $\text{OCH}_2\text{CH}_3$ ), 13.8 ( $\text{CH}_2\text{CH}_3$ ),

19.2 ( $\text{CH}_2\text{CH}_3$ ), 21.4 ( $\text{CH}_3$ ), 25.6 ( $(\text{CH}_3)_3$ ), 30.6 ( $\text{OCH}_2\text{CH}_2$ ), 35.6 ( $\text{C}(\text{CH}_3)_3$ ), 62.2 ( $\text{OCH}_2\text{CH}_3$ ), 66.0 ( $\text{OCH}_2\text{CH}_2$ ), 83.1 (C4), 97.0 (C2), 126.5 (Ar-C), 128.7 (Ar-C), 131.4 (Ar-C), 138.0 (Ar-C), 164.5 (C10), 167.6 (C9), 172.2 (C8), 185.0 (C6); LRMS ( $\text{ESI}^-$ )  $m/z$ : 458.1 ( $[\text{M} - \text{H}]^-$  94%); HRMS ( $\text{ESI}^-$ )  $m/z$ :  $[\text{M} - \text{H}]^-$  calcd. for  $\text{C}_{25}\text{H}_{32}\text{NO}_7$ , 458.2184, found 458.2185.

**6-Butyl 7a-ethyl (1S\*,3R\*,7aR\*)-3-(tert-butyl)-1-(4-butylphenyl)-7-hydroxy-5-oxo-1H,3H-pyrrolo[1,2-c]oxazole-6,7a(5H)-dicarboxylate 22c**

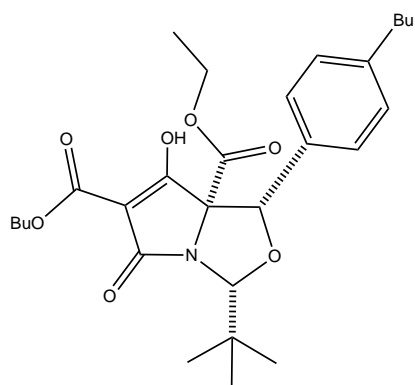

Yield (117 mg, 10%); Orange oil;  $R_f$  (70% EtOAc in Pet. Ether 40:60) 0.25;  $\nu_{\max}/\text{cm}^{-1}$  2959 (C-H), 2932 (C-H), 2872 (C-H), 1732 (C=O), 1657 (C=O), 1627 (C=C);  $\delta_H$  (400 MHz,  $\text{CDCl}_3$ ) 0.90-1.02 (9H, m,  $\text{CH}_2\text{CH}_3$ ,  $\text{CH}_2\text{CH}_3$ ,  $\text{OCH}_2\text{CH}_3$ ), 1.08 (9H, s,  $\text{C}(\text{CH}_3)_3$ ), 1.35 (2H, m,  $\text{CH}_2\text{CH}_3$ ), 1.47 (2H, m,  $\text{CH}_2\text{CH}_3$ ), 1.60 (2H, m,  $\text{CH}_2\text{CH}_3$ ), 1.77 (2H, m,  $\text{OCH}_2\text{CH}_2$ ), 2.62 (2H, m,  $\text{CH}_2\text{CH}_2$ ), 3.95 (2H, m,  $\text{OCH}_2\text{CH}_3$ ), 4.36 (2H, m,  $\text{OCH}_2\text{CH}_2$ ), 4.78 (1H, s, H4), 4.89 (1H, s, H2), 7.18 (2H, d,  $J=8.2$  Hz, Ar-H), 7.43 (2H, d,  $J=8.0$  Hz, Ar-H);  $\delta_C$  (101 MHz,  $\text{CDCl}_3$ ) 13.6 ( $\text{CH}_2\text{CH}_3$ ), 13.8 ( $\text{OCH}_2\text{CH}_3$ ), 14.0 ( $\text{CH}_2\text{CH}_3$ ), 19.1 ( $\text{CH}_2\text{CH}_3$ ), 22.4 ( $\text{CH}_2\text{CH}_3$ ), 25.5 ( $(\text{CH}_3)_3$ ), 30.6 ( $\text{OCH}_2\text{CH}_2$ ), 33.6 ( $\text{CH}_2\text{CH}_2$ ), 35.5 ( $\text{CH}_2\text{CH}_2$ ), 35.5 ( $\text{C}(\text{CH}_3)_3$ ), 62.1 ( $\text{OCH}_2\text{CH}_3$ ), 65.9 ( $\text{OCH}_2\text{CH}_2$ ), 82.9 (C4), 97.0 (C2), 126.4 (Ar-C), 128.0 (Ar-C), 131.6 (Ar-C), 143.0 (Ar-C), 164.5 (C10), 167.6 (C9), 172.1 (C8), 184.9 (C6); LRMS (ESI<sup>-</sup>)  $m/z$ : 500.2 ( $[\text{M} - \text{H}]^-$  96%); HRMS (ESI<sup>-</sup>)  $m/z$ :  $[\text{M} - \text{H}]^-$  calcd. for  $\text{C}_{28}\text{H}_{38}\text{NO}_7$ , 500.2654, found 500.2655.

**6-Butyl 7a-ethyl (1S\*,3R\*,7aR\*)-3-(tert-butyl)-7-hydroxy-1-(4-methoxyphenyl)-5-oxo-1H,3H-pyrrolo[1,2-c]oxazole-6,7a(5H)-dicarboxylate 22d**

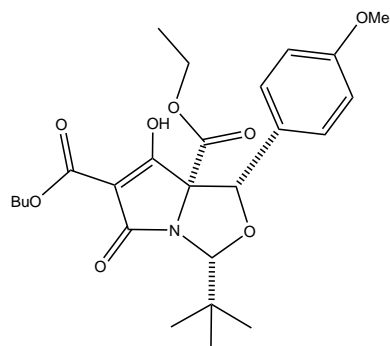

Yield (490 mg, 19%); Red oil;  $R_f$  (100% EtOAc) 0.40;  $\nu_{\max}/\text{cm}^{-1}$  2961 (C-H), 1731 (C=O), 1658 (C=O), 1617 (C=C);  $\delta_H$  (400 MHz,  $\text{CDCl}_3$ ) 0.97 (3H, t,  $J=7.4$  Hz,  $\text{OCH}_2\text{CH}_3$ ), 1.03 (3H, m,  $\text{CH}_2\text{CH}_3$ ), 1.07 (9H, s,  $\text{C}(\text{CH}_3)_3$ ), 1.46 (2H, m,  $\text{CH}_2\text{CH}_3$ ), 1.77 (2H, m,  $\text{OCH}_2\text{CH}_2$ ), 3.81 (3H, s,  $\text{OCH}_3$ ), 3.98 (2H, m,  $\text{OCH}_2\text{CH}_3$ ), 4.36 (2H, m,  $\text{OCH}_2\text{CH}_2$ ), 4.75 (1H, s, H4), 4.89 (1H, s, H2), 6.90 (2H, d,  $J=8.8$  Hz, Ar-H), 7.44 (2H, d,  $J=8.7$  Hz, Ar-H);  $\delta_C$  (101 MHz,  $\text{CDCl}_3$ ) 13.8 ( $\text{OCH}_2\text{CH}_3$ ), 13.8 ( $\text{CH}_2\text{CH}_3$ ), 19.2 ( $\text{CH}_2\text{CH}_3$ ), 25.6 ( $(\text{CH}_3)_3$ ), 30.6 ( $\text{OCH}_2\text{CH}_2$ ), 35.6 ( $\text{C}(\text{CH}_3)_3$ ), 55.4 ( $\text{OCH}_3$ ), 62.2 ( $\text{OCH}_2\text{CH}_3$ ), 66.0 ( $\text{OCH}_2\text{CH}_2$ ), 80.5 (C5), 83.0 (C4), 97.1 (C2), 113.4 (Ar-C), 126.4 (Ar-C), 127.9 (Ar-C), 159.6 (Ar-C), 164.5 (C10), 167.5 (C9), 172.2 (C8), 185.0 (C6); LRMS (ESI<sup>-</sup>)  $m/z$ : 474.2 ( $[\text{M} - \text{H}]^-$  95%); HRMS (ESI<sup>-</sup>)  $m/z$ :  $[\text{M} - \text{H}]^-$  calcd. for  $\text{C}_{25}\text{H}_{32}\text{NO}_8$ , 474.2133, found 474.2134.

**6-Butyl 7a-ethyl (1S\*,3R\*,7aR\*)-3-(tert-butyl)-1-(4-fluorophenyl)-7-hydroxy-5-oxo-1H,3H-pyrrolo[1,2-c]oxazole-6,7a(5H)-dicarboxylate 22e**



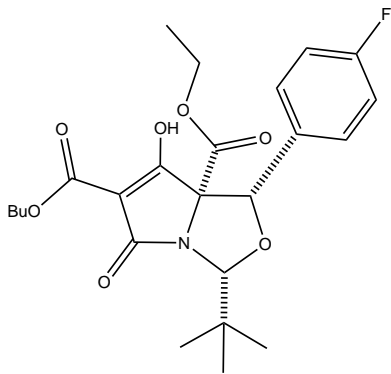

Yield (238 mg, 27%); Red oil;  $R_f$  (70% EtOAc in Pet. Ether 40:60) 0.23;  $\nu_{\max}/\text{cm}^{-1}$  2962 (C-H), 1733 (C=O), 1658 (C=O), 1628 (C=C);  $\delta_H$  (400 MHz,  $\text{CDCl}_3$ ) 0.97 (3H, t,  $J=7.4$  Hz,  $\text{OCH}_2\text{CH}_3$ ), 1.04 (3H, t,  $J=7.2$  Hz,  $\text{CH}_2\text{CH}_3$ ), 1.06 (9H, s,  $\text{C}(\text{CH}_3)_3$ ), 1.47 (2H, m,  $\text{CH}_2\text{CH}_3$ ), 1.77 (2H, m,  $\text{OCH}_2\text{CH}_2$ ), 3.99 (2H, m,  $\text{OCH}_2\text{CH}_3$ ), 4.36 (2H, m,  $\text{OCH}_2\text{CH}_2$ ), 4.76 (1H, s, H4), 4.91 (1H, s, H2), 7.06 (2H, app t,  $J=8.7$  Hz, Ar-H), 7.51 (2H, dd,  $J=5.4$  Hz, 8.4 Hz, Ar-H);  $\delta_C$  (101 MHz,  $\text{CDCl}_3$ ) 13.8 ( $\text{OCH}_2\text{CH}_3$ ), 13.8 ( $\text{CH}_2\text{CH}_3$ ), 19.2 ( $\text{CH}_2\text{CH}_3$ ), 25.5 ( $(\text{CH}_3)_3$ ), 30.6 ( $\text{OCH}_2\text{CH}_2$ ), 35.6 ( $\text{C}(\text{CH}_3)_3$ ), 62.3 ( $\text{OCH}_2\text{CH}_3$ ), 66.0 ( $\text{OCH}_2\text{CH}_2$ ), 82.2 (C4), 97.1 (C2), 115.0 (d,  $J=21.7$  Hz, Ar-C), 128.3 (d,  $J=8.1$  Hz, Ar-C), 130.4 (d,  $J=3.2$  Hz, Ar-C), 162.7 (d,  $J=246.6$  Hz, Ar-C), 164.6 (C10), 167.7 (C9), 172.0 (C8), 184.8 (C6);  $\delta_F$  (377 MHz,  $\text{CDCl}_3$ ) -113.88; LRMS (ESI)  $m/z$ : 462.1 ( $[\text{M} - \text{H}]^-$  95%).

**6-Butyl 7a-ethyl (1S\*,3R\*,7aR\*)-3-(tert-butyl)-1-(4-chlorophenyl)-7-hydroxy-5-oxo-1H,3H-pyrrolo[1,2-c]oxazole-6,7a(5H)-dicarboxylate 22f**

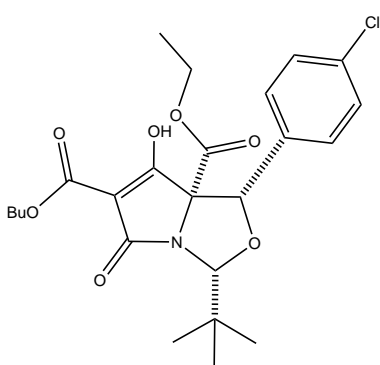

Yield (151 mg, 11%); Orange oil;  $R_f$  (70% EtOAc in Pet. Ether 40:60) 0.25;  $\nu_{\max}/\text{cm}^{-1}$  2961 (C-H), 1733 (C=O), 1658 (C=O), 1628 (C=C);  $\delta_H$  (400 MHz,  $\text{CDCl}_3$ ) 0.97 (3H, t,  $J=7.4$  Hz,  $\text{OCH}_2\text{CH}_3$ ), 1.03 (3H, m,  $\text{CH}_2\text{CH}_3$ ), 1.06 (9H, s,  $\text{C}(\text{CH}_3)_3$ ), 1.47 (2H, m,  $\text{CH}_2\text{CH}_3$ ), 1.78 (2H, m,  $\text{OCH}_2\text{CH}_2$ ), 4.00 (2H, m,  $\text{OCH}_2\text{CH}_3$ ), 4.37 (2H, m,  $\text{OCH}_2\text{CH}_2$ ), 4.75 (1H, s, H4), 4.91 (1H, s, H2), 7.35 (2H, d,  $J=8.6$  Hz, Ar-H), 7.48 (2H, d,  $J=8.3$  Hz, Ar-H);  $\delta_C$  (101 MHz,  $\text{CDCl}_3$ ) 13.8 ( $\text{OCH}_2\text{CH}_3$ ), 13.8 ( $\text{CH}_2\text{CH}_3$ ), 19.2 ( $\text{CH}_2\text{CH}_3$ ), 25.5 ( $(\text{CH}_3)_3$ ), 30.6 ( $\text{OCH}_2\text{CH}_2$ ), 35.6 ( $\text{C}(\text{CH}_3)_3$ ), 62.4 ( $\text{OCH}_2\text{CH}_3$ ), 66.1 ( $\text{OCH}_2\text{CH}_2$ ), 82.2 (C4), 97.1 (C2), 127.9 (Ar-C), 128.2 (Ar-C), 133.1 (Ar-C), 134.1 (Ar-C), 164.4 (C10), 170.9 (C8), 184.6 (C6); LRMS (ESI)  $m/z$ : 478.0 ( $[\text{M}^{35} - \text{H}]^-$  88%), 480.0 ( $[\text{M}^{37} - \text{H}]^-$  32%); HRMS (ESI)  $m/z$ :  $[\text{M}^{35} - \text{H}]^-$  calcd. for  $\text{C}_{24}\text{H}_{29}\text{NO}_7\text{Cl}$ , 478.1638, found 478.1638;  $[\text{M}^{37} - \text{H}]^-$  calcd. for  $\text{C}_{24}\text{H}_{29}\text{NO}_7\text{Cl}$ , 480.1613, found 480.1603.

**General procedure for the synthesis of C7-carboxamidotetramic acids 23:**<sup>20-21</sup>

To a solution of C7-butyl ester tetramic acids **22a-f** (1.0 eq.) in anhydrous toluene was added 1-adamantylamine (1.2 eq.). The mixture was heated at reflux overnight. Then the reaction mixture was left to cool to rt, and the

solvent was evaporated *in-vacuo* and the concentrate was purified by flash column chromatography to yield tetramates that were chelated with metals. The tetramates were then redissolved in DCM, washed with 10% citric acid solution (aq.), dried over Na<sub>2</sub>SO<sub>4</sub>, filtered and concentrated under reduced pressure to yield the desired carboxamides **23a-f**.

**Ethyl (1S\*,3R\*,7aR\*)-6-(adamantan-1-ylcarbamoyl)-3-(tert-butyl)-7-hydroxy-5-oxo-1-phenyl-1H,3H-pyrrolo[1,2-c]oxazole-7a(5H)-carboxylate 23a**

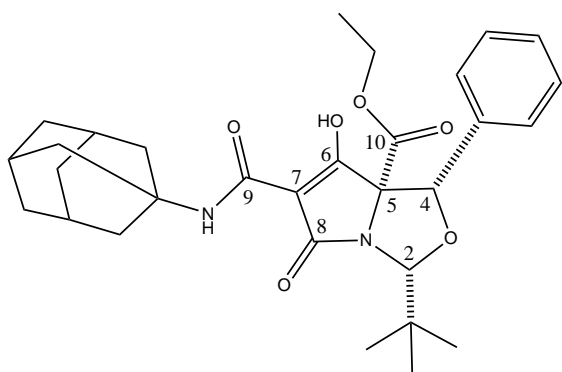

Yield (242 mg, 42%); Brown foamy solid; m.p. 108-111°C; R<sub>f</sub> (30% EtOAc in Pet. Ether 40:60) 0.40;  $\nu_{\max}/\text{cm}^{-1}$  3307 (O-H), 2910 (C-H), 2853 (C-H), 1738 (C=O), 1697 (C=O), 1652 (C=O), 1627 (C=C); AB:CD 54:46 by  $\delta_{\text{H}}$ -NMR;  $\delta_{\text{H}}$  (400 MHz, CDCl<sub>3</sub>) 0.93 (3H, t, *J*=7.2 Hz, OCH<sub>2</sub>CH<sub>3</sub>), 0.96 (3H, t, *J*=6.5 Hz, OCH<sub>2</sub>CH<sub>3</sub>), 1.08 (9H, s, C(CH<sub>3</sub>)<sub>3</sub>), 1.72 (6H, br s, Adamantyl-CH<sub>2</sub>), 2.10 (6H, m, Adamantyl-CH<sub>2</sub>), 2.15 (3H, br s, Adamantyl-CH), 3.93 (2H, m, OCH<sub>2</sub>CH<sub>3</sub>), 4.80 (1H, s, H<sub>4</sub>), 4.80 (1H, s, H<sub>4</sub>), 4.87 (1H, s, H<sub>2</sub>), 4.88 (1H, s, H<sub>2</sub>), 7.29-7.38 (3H, m, Ar-H), 7.54-7.58 (2H, m, Ar-H), 7.67 (1H, br s, NH/OH), 7.98 (1H, br s, NH/OH), 8.59 (2H, br s, NH/OH);  $\delta_{\text{C}}$  (101 MHz, CDCl<sub>3</sub>) 13.7 (OCH<sub>2</sub>CH<sub>3</sub>), 13.7 (OCH<sub>2</sub>CH<sub>3</sub>), 25.5 ((CH<sub>3</sub>)<sub>3</sub>), 25.5 ((CH<sub>3</sub>)<sub>3</sub>), 29.5 (Adamantyl-C), 35.5 (C(CH<sub>3</sub>)<sub>3</sub>), 35.6 (C(CH<sub>3</sub>)<sub>3</sub>), 36.0 (Adamantyl-C), 36.1 (Adamantyl-C), 41.7 (Adamantyl-C), 41.8 (Adamantyl-C), 54.1 (Adamantyl-C), 54.9 (Adamantyl-C), 61.6 (OCH<sub>2</sub>CH<sub>3</sub>), 61.9 (OCH<sub>2</sub>CH<sub>3</sub>), 77.3 (C<sub>5</sub>), 79.1 (C<sub>5</sub>), 81.1 (C<sub>4</sub>), 82.0 (C<sub>4</sub>), 85.7 (C<sub>7</sub>), 92.5 (C<sub>7</sub>), 96.5 (C<sub>2</sub>), 96.7 (C<sub>2</sub>), 126.4 (Ar-C), 126.4 (Ar-C), 127.7 (Ar-C), 127.8 (Ar-C), 127.9 (Ar-C), 127.9 (Ar-C), 135.3 (Ar-C), 135.8 (Ar-C), 165.5 (C<sub>10</sub>), 166.2 (C<sub>10</sub>), 166.9 (C<sub>9</sub>), 167.3 (C<sub>9</sub>), 176.9 (C<sub>8</sub>), 182.6 (C<sub>8</sub>), 188.0 (C<sub>6</sub>), 189.4 (C<sub>6</sub>); LRMS (ESI<sup>-</sup>) *m/z*: 521.2 ([M - H]<sup>-</sup> 100%); LRMS (ESI<sup>+</sup>) *m/z*: 545.2 ([M + Na]<sup>+</sup> 94%); HRMS (ESI<sup>-</sup>) *m/z*: [M - H]<sup>-</sup> calcd. for C<sub>30</sub>H<sub>37</sub>N<sub>2</sub>O<sub>6</sub>, 521.2657, found 521.2655.

**Ethyl (1S\*,3R\*,7aR\*)-6-(adamantan-1-ylcarbamoyl)-3-(tert-butyl)-7-hydroxy-5-oxo-1-(*p*-tolyl)-1H,3H-pyrrolo[1,2-c]oxazole-7a(5H)-carboxylate 23b**

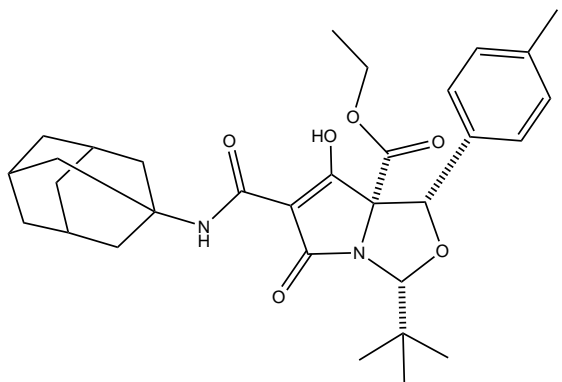

Yield (76 mg, 49%); Brown foamy solid; m.p. 115-120°C;  $R_f$  (30% EtOAc in Pet. Ether 40:60) 0.68;  $\nu_{\max}/\text{cm}^{-1}$  3309 (O-H), 2910 (C-H), 2853 (C-H), 1738 (C=O), 1694 (C=O), 1651 (C=O), 1625 (C=C); AB:CD 58:42 by  $\delta_{\text{H}}$ -NMR;  $\delta_{\text{H}}$  (400 MHz,  $\text{CDCl}_3$ ) 0.97 (3H, t,  $J=7.1$  Hz,  $\text{OCH}_2\text{CH}_3$ ), 1.00 (3H, t,  $J=7.2$  Hz,  $\text{OCH}_2\text{CH}_3$ ), 1.07 (9H, s,  $\text{C}(\text{CH}_3)_3$ ), 1.72 (6H, br s, Adamantyl- $\text{CH}_2$ ), 2.09 (6H, m, Adamantyl- $\text{CH}_2$ ), 2.15 (3H, br s, Adamantyl-CH), 2.35 (3H, s,  $\text{CH}_3$ ), 3.95 (2H, m,  $\text{OCH}_2\text{CH}_3$ ), 4.75 (1H, s, H4), 4.85 (1H, s, H2), 4.86 (1H, s, H2), 7.15-7.18 (2H, m, Ar-H), 7.42-7.45 (2H, m, Ar-H), 7.66 (1H, br s, NH/OH), 7.97 (1H, br s, NH/OH), 9.96 (2H, br s, NH/OH);  $\delta_{\text{C}}$  (101 MHz,  $\text{CDCl}_3$ ) 13.7 ( $\text{OCH}_2\text{CH}_3$ ), 21.4 ( $\text{CH}_3$ ), 25.4 ( $(\text{CH}_3)_3$ ), 25.5 ( $(\text{CH}_3)_3$ ), 29.4 (Adamantyl-C), 35.4 ( $\text{C}(\text{CH}_3)_3$ ), 35.5 ( $\text{C}(\text{CH}_3)_3$ ), 36.0 (Adamantyl-C), 36.1 (Adamantyl-C), 41.6 (Adamantyl-C), 41.7 (Adamantyl-C), 54.0 (Adamantyl-C), 54.8 (Adamantyl-C), 61.5 ( $\text{OCH}_2\text{CH}_3$ ), 61.8 ( $\text{OCH}_2\text{CH}_3$ ), 79.0 (C5), 81.1 (C4), 82.1 (C4), 85.6 (C7), 92.7 (C7), 96.4 (C2), 96.6 (C2), 126.3 (Ar-C), 128.5 (Ar-C), 128.6 (Ar-C), 132.1 (Ar-C), 132.7 (Ar-C), 137.2 (Ar-C), 137.5 (Ar-C), 165.3 (C10), 166.0 (C10), 166.8 (C9), 167.2 (C9), 176.8 (C8), 182.6 (C8), 187.9 (C6), 189.1 (C6); LRMS (ESI<sup>-</sup>)  $m/z$ : 535.2 ( $[\text{M} - \text{H}]^-$  96%); HRMS (ESI<sup>-</sup>)  $m/z$ :  $[\text{M} - \text{H}]^-$  calcd. for  $\text{C}_{31}\text{H}_{39}\text{N}_2\text{O}_6$ , 535.2814, found 535.2816.

**Ethyl (1*S*\*,3*R*\*,7*aR*\*)-6-(adamantan-1-ylcarbamoyl)-3-(*tert*-butyl)-1-(4-butylphenyl)-7-hydroxy-5-oxo-1*H*,3*H*-pyrrolo[1,2-*c*]oxazole-7*a*(5*H*)-carboxylate 23c**

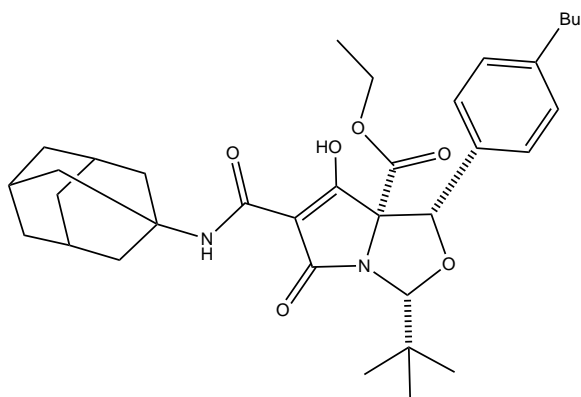

Yield (47 mg, 35%); Brown foamy solid; m.p. 84-90°C;  $R_f$  (20% EtOAc in Pet. Ether 40:60) 0.65;  $\nu_{\max}/\text{cm}^{-1}$  3309 (O-H), 2956 (C-H), 2911 (C-H), 2854 (C-H), 1738 (C=O), 1698 (C=O), 1651 (C=O), 1627 (C=C); AB:CD 58:42 by  $\delta_{\text{H}}$ -NMR;  $\delta_{\text{H}}$  (400 MHz,  $\text{CDCl}_3$ ) 0.90-0.98 (6H, m,  $\text{CH}_2\text{CH}_3$ ,  $\text{OCH}_2\text{CH}_3$ ), 1.08 (9H, s,  $\text{C}(\text{CH}_3)_3$ ), 1.33 (2H, m,  $\text{CH}_2\text{CH}_3$ ), 1.59 (2H, m,  $\text{CH}_2\text{CH}_2$ ), 1.72 (6H, br s, Adamantyl- $\text{CH}_2$ ), 2.09 (6H, m, Adamantyl- $\text{CH}_2$ ), 2.15 (3H, br s, Adamantyl-CH), 2.61 (2H, t,  $J=7.7$  Hz,  $\text{CH}_2\text{CH}_2$ ), 3.94 (2H, m,  $\text{OCH}_2\text{CH}_3$ ), 4.76 (1H, s, H4), 4.77 (1H, s, H4), 4.85 (1H, s, H2), 4.85 (1H, s, H2), 7.15-7.18 (2H, m, Ar-H), 7.43-7.46 (2H, m, Ar-H), 7.65 (1H, br s, NH/OH), 7.98 (1H, br s, NH/OH), 9.78 (2H, br s, NH/OH);

$\delta_c$  (101 MHz, CDCl<sub>3</sub>) 13.7 (OCH<sub>2</sub>CH<sub>3</sub>), 13.7 (OCH<sub>2</sub>CH<sub>3</sub>), 14.1 (CH<sub>2</sub>CH<sub>3</sub>), 22.4 (CH<sub>2</sub>CH<sub>3</sub>), 25.5 ((CH<sub>3</sub>)<sub>3</sub>), 25.6 ((CH<sub>3</sub>)<sub>3</sub>), 29.5 (Adamantyl-C), 33.7 (CH<sub>2</sub>CH<sub>2</sub>), 33.8 (CH<sub>2</sub>CH<sub>2</sub>), 35.5 (C(CH<sub>3</sub>)<sub>3</sub>), 35.5 (CH<sub>2</sub>CH<sub>2</sub>), 36.0 (Adamantyl-C), 36.1 (Adamantyl-C), 41.7 (Adamantyl-C), 41.7 (Adamantyl-C), 54.0 (Adamantyl-C), 54.8 (Adamantyl-C), 61.5 (OCH<sub>2</sub>CH<sub>3</sub>), 61.8 (OCH<sub>2</sub>CH<sub>3</sub>), 77.3 (C5), 79.2 (C5), 81.3 (C4), 82.2 (C4), 85.6 (C7), 92.8 (C7), 96.5 (C2), 96.7 (C2), 126.3 (Ar-C), 126.4 (Ar-C), 127.9 (Ar-C), 128.0 (Ar-C), 132.4 (Ar-C), 132.9 (Ar-C), 142.4 (Ar-C), 142.6 (Ar-C), 165.4 (C10), 166.1 (C10), 166.8 (C9), 167.2 (C9), 176.9 (C8), 182.6 (C8), 187.9 (C6), 189.2 (C6); LRMS (ESI<sup>-</sup>)  $m/z$ : 577.3 ([M - H]<sup>-</sup> 95%); HRMS (ESI<sup>-</sup>)  $m/z$ : [M - H]<sup>-</sup> calcd. for C<sub>34</sub>H<sub>45</sub>N<sub>2</sub>O<sub>6</sub>, 577.3283, found 577.3279.

**Ethyl (1S\*,3R\*,7aR\*)-6-(adamantan-1-ylcarbamoyl)-3-(tert-butyl)-7-hydroxy-1-(4-methoxyphenyl)-5-oxo-1H,3H-pyrrolo[1,2-c]oxazole-7a(5H)-carboxylate 23d**

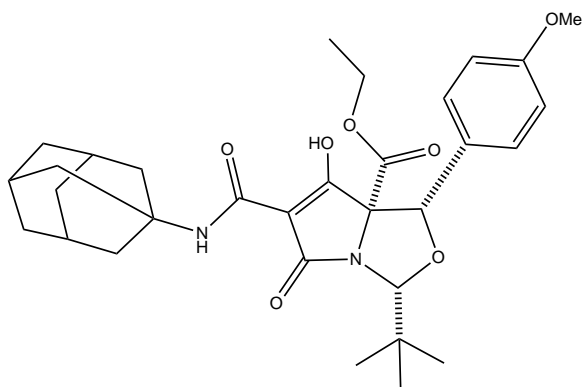

Yield (142 mg, 26%); Brown foamy solid; m.p. 108-111°C; R<sub>f</sub> (30% EtOAc in Pet. Ether 40:60) 0.45;  $\nu_{\max}/\text{cm}^{-1}$  3310 (O-H), 2910 (C-H), 2853 (C-H), 1736 (C=O), 1696 (C=O), 1651 (C=O), 1624 (C=C); AB:CD 55:45 by  $\delta_{\text{H}}$ -NMR;  $\delta_{\text{H}}$  (400 MHz, CDCl<sub>3</sub>) 0.98 (3H, t,  $J=7.1$  Hz, OCH<sub>2</sub>CH<sub>3</sub>), 1.01 (3H, t,  $J=7.1$  Hz, OCH<sub>2</sub>CH<sub>3</sub>), 1.07 (9H, s, C(CH<sub>3</sub>)<sub>3</sub>), 1.71 (6H, br s, Adamantyl-

CH<sub>2</sub>), 2.09 (6H, m, Adamantyl-CH<sub>2</sub>), 2.15 (3H, br s, Adamantyl-CH), 3.81 (3H, s, OCH<sub>3</sub>), 3.81 (3H, s, OCH<sub>3</sub>), 3.96 (2H, m, OCH<sub>2</sub>CH<sub>3</sub>), 4.73 (1H, s, H4), 4.74 (1H, s, H4), 4.84 (1H, s, H2), 4.85 (1H, s, H2), 6.88-6.91 (2H, m, Ar-H), 7.08 (2H, br s, NH/OH), 7.44-7.48 (2H, m, Ar-H), 7.65 (1H, br s, NH/OH), 7.96 (1H, br s, NH/OH);  $\delta_c$  (101 MHz, CDCl<sub>3</sub>) 13.8 (OCH<sub>2</sub>CH<sub>3</sub>), 25.5 ((CH<sub>3</sub>)<sub>3</sub>), 25.6 ((CH<sub>3</sub>)<sub>3</sub>), 29.5 (Adamantyl-C), 35.5 (C(CH<sub>3</sub>)<sub>3</sub>), 35.5 (C(CH<sub>3</sub>)<sub>3</sub>), 36.0 (Adamantyl-C), 36.1 (Adamantyl-C), 41.7 (Adamantyl-C), 41.7 (Adamantyl-C), 54.1 (Adamantyl-C), 54.9 (Adamantyl-C), 55.4 (OCH<sub>3</sub>), 61.6 (OCH<sub>2</sub>CH<sub>3</sub>), 61.9 (OCH<sub>2</sub>CH<sub>3</sub>), 79.0 (C5), 81.1 (C4), 82.0 (C4), 85.6 (C7), 92.7 (C7), 96.5 (C2), 96.7 (C2), 113.3 (Ar-C), 113.4 (Ar-C), 127.2 (Ar-C), 127.7 (Ar-C), 159.2 (Ar-C), 159.4 (Ar-C), 165.4 (C10), 166.1 (C10), 166.8 (C9), 167.2 (C9), 176.9 (C8), 182.7 (C8), 188.0 (C6), 189.3 (C6); LRMS (ESI<sup>-</sup>)  $m/z$ : 551.2 ([M - H]<sup>-</sup> 95%); HRMS (ESI<sup>-</sup>)  $m/z$ : [M - H]<sup>-</sup> calcd. for C<sub>31</sub>H<sub>39</sub>N<sub>2</sub>O<sub>7</sub>, 551.2763, found 551.2768.

**Ethyl (1*S*\*,3*R*\*,7*aR*\*)-6-(adamantan-1-ylcarbamoyl)-3-(*tert*-butyl)-1-(4-fluorophenyl)-7-hydroxy-5-oxo-1*H*,3*H*-pyrrolo[1,2-*c*]oxazole-7*a*(5*H*)-carboxylate 23e**

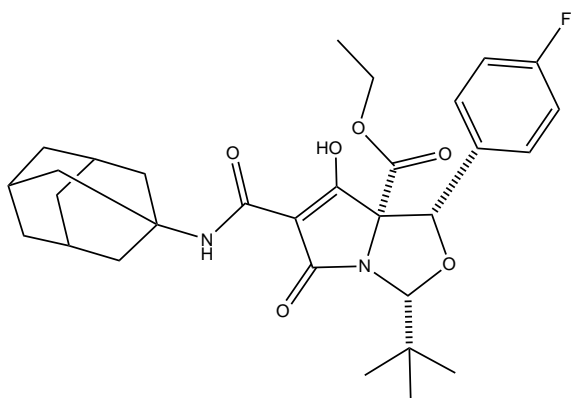

Yield (151 mg, 54%); Brown foamy solid; m.p. 98-102°C; *R*<sub>f</sub>

(30% EtOAc in Pet. Ether 40:60) 0.68;  $\nu_{\max}/\text{cm}^{-1}$  3305 (O-H),

2911 (C-H), 2854 (C-H), 1739 (C=O), 1697 (C=O), 1653 (C=O),

1628 (C=C); AB:CD 53:47 by  $\delta_{\text{F}}$ -NMR;  $\delta_{\text{H}}$  (400 MHz, CDCl<sub>3</sub>)

1.00 (3H, m, OCH<sub>2</sub>CH<sub>3</sub>), 1.06 (9H, s, C(CH<sub>3</sub>)<sub>3</sub>), 1.72 (6H, br s,

Adamantyl-CH<sub>2</sub>), 2.09 (6H, m, Adamantyl-CH<sub>2</sub>), 2.15 (3H, br

s, Adamantyl-CH), 3.95 (2H, m, OCH<sub>2</sub>CH<sub>3</sub>), 4.75 (1H, s, H<sub>4</sub>), 4.86 (1H, s, H<sub>2</sub>), 7.05 (2H, app t, *J*=8.6 Hz, Ar-H), 7.53

(2H, m, Ar-H), 7.70 (1H, br s, NH/OH), 7.98 (1H, br s, NH/OH);  $\delta_{\text{C}}$  (101 MHz, CDCl<sub>3</sub>) 13.8 (OCH<sub>2</sub>CH<sub>3</sub>), 25.4 ((CH<sub>3</sub>)<sub>3</sub>),

29.5 (Adamantyl-C), 35.5 (C(CH<sub>3</sub>)<sub>3</sub>), 35.5 (C(CH<sub>3</sub>)<sub>3</sub>), 36.0 (Adamantyl-C), 36.1 (Adamantyl-C), 41.7 (Adamantyl-C),

54.3 (Adamantyl-C), 55.0 (Adamantyl-C), 61.7 (OCH<sub>2</sub>CH<sub>3</sub>), 61.9 (OCH<sub>2</sub>CH<sub>3</sub>), 78.8 (C<sub>5</sub>), 80.5 (C<sub>4</sub>), 81.3 (C<sub>4</sub>), 85.6

(C<sub>7</sub>), 91.9 (C<sub>7</sub>), 96.5 (C<sub>2</sub>), 96.7 (C<sub>2</sub>), 114.7 (d, *J*=21.0 Hz, Ar-C), 114.9 (d, *J*=21.5 Hz, Ar-C), 128.1 (d, *J*=8.2 Hz, Ar-

C), 131.1 (d, *J*=3.0 Hz, Ar-C), 131.6 (d, *J*=3.0 Hz, Ar-C), 162.5 (d, *J*=245.8 Hz, Ar-C), 165.5 (C<sub>10</sub>), 166.1 (C<sub>10</sub>), 166.9

(C<sub>9</sub>), 167.2 (C<sub>9</sub>), 176.9 (C<sub>8</sub>), 182.5 (C<sub>8</sub>), 187.9 (C<sub>6</sub>), 189.7 (C<sub>6</sub>);  $\delta_{\text{F}}$  (377 MHz, CDCl<sub>3</sub>) -114.56, -114.97; LRMS (ESI<sup>-</sup>)

*m/z*: 539.2 ([*M* - H]<sup>-</sup> 83%); HRMS (ESI<sup>+</sup>) *m/z*: [*M* + H]<sup>+</sup> calcd. for C<sub>30</sub>H<sub>38</sub>N<sub>2</sub>O<sub>6</sub>F, 541.2708, found 541.2707.

**Ethyl (1*S*\*,3*R*\*,7*aR*\*)-6-(adamantan-1-ylcarbamoyl)-3-(*tert*-butyl)-1-(4-chlorophenyl)-7-hydroxy-5-oxo-1*H*,3*H*-pyrrolo[1,2-*c*]oxazole-7*a*(5*H*)-carboxylate 23f**

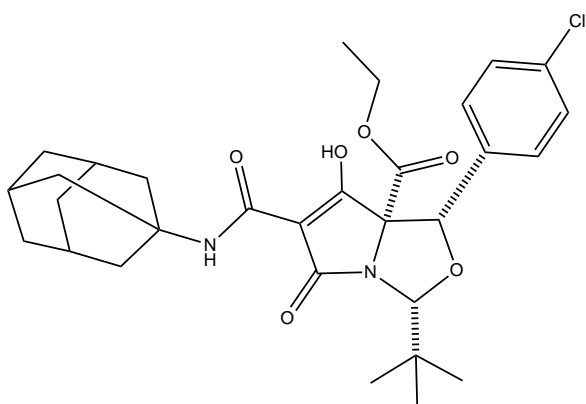

Yield (93 mg, 60%); Brown foamy solid; m.p. 131-135°C; *R*<sub>f</sub>

(30% EtOAc in Pet. Ether 40:60) 0.63;  $\nu_{\max}/\text{cm}^{-1}$  3309 (O-H),

2911 (C-H), 2853 (C-H), 1757 (C=O), 1740 (C=O), 1697 (C=O),

1628 (C=C); AB:CD 55:45 by  $\delta_{\text{H}}$ -NMR;  $\delta_{\text{H}}$  (400 MHz, CDCl<sub>3</sub>)

0.97-1.03 (6H, m, OCH<sub>2</sub>CH<sub>3</sub>), 1.05 (9H, s, C(CH<sub>3</sub>)<sub>3</sub>), 1.72 (6H,

br s, Adamantyl-CH<sub>2</sub>), 2.09 (6H, m, Adamantyl-CH<sub>2</sub>), 2.16

(3H, br s, Adamantyl-CH), 3.96 (2H, m, OCH<sub>2</sub>CH<sub>3</sub>), 4.74 (1H, s, H<sub>4</sub>), 4.86 (1H, s, H<sub>2</sub>), 4.87 (1H, s, H<sub>2</sub>), 7.31-7.34

(2H, m, Ar-H), 7.49-7.53 (2H, m, Ar-H), 7.71 (1H, br s, NH/OH), 7.95 (1H, br s, NH/OH);  $\delta_{\text{C}}$  (101 MHz, CDCl<sub>3</sub>) 13.8

(OCH<sub>2</sub>CH<sub>3</sub>), 25.4 ((CH<sub>3</sub>)<sub>3</sub>), 25.4 ((CH<sub>3</sub>)<sub>3</sub>), 29.4 (Adamantyl-C), 35.5 (C(CH<sub>3</sub>)<sub>3</sub>), 35.5 (C(CH<sub>3</sub>)<sub>3</sub>), 36.0 (Adamantyl-C), 36.1 (Adamantyl-C), 41.7 (Adamantyl-C), 41.7 (Adamantyl-C), 54.3 (Adamantyl-C), 55.0 (Adamantyl-C), 61.8 (OCH<sub>2</sub>CH<sub>3</sub>), 62.0 (OCH<sub>2</sub>CH<sub>3</sub>), 77.1 (C5), 78.7 (C5), 80.4 (C4), 81.2 (C4), 85.6 (C7), 91.7 (C7), 96.5 (C2), 96.6 (C2), 127.8 (Ar-C), 127.8 (Ar-C), 128.0 (Ar-C), 128.1 (Ar-C), 133.4 (Ar-C), 133.7 (Ar-C), 134.0 (Ar-C), 134.4 (Ar-C), 165.5 (C10), 166.1 (C10), 166.9 (C9), 167.2 (C9), 176.9 (C8), 182.5 (C8), 187.9 (C6), 189.8 (C6); LRMS (ESI<sup>-</sup>) *m/z*: 555.2 ([M<sup>35</sup> – H]<sup>-</sup> 97%), 557.2 ([M<sup>37</sup> – H]<sup>-</sup> 36%); HRMS (ESI<sup>-</sup>) *m/z*: [M<sup>35</sup> – H]<sup>-</sup> calcd. for C<sub>30</sub>H<sub>36</sub>N<sub>2</sub>O<sub>6</sub>Cl, 555.2267, found 555.2275; [M<sup>37</sup> – H]<sup>-</sup> calcd. for C<sub>30</sub>H<sub>36</sub>N<sub>2</sub>O<sub>6</sub>Cl, 557.2247, found 557.2241.

### General procedure for the synthesis of C7-acyltetramates 25.<sup>20,22-23</sup>

To a stirring solution of tetramic acid **14a** (1 eq.) in DCM was added DCC (1.1 eq.) and DMAP (1.3 eq.). The solution was cooled to 0°C and the respective carboxylic acid (1.1 eq.) was added portion wise. The reaction mixture was then left to stir at rt overnight. The suspension was then filtered, and the filtrate was concentrated *in-vacuo*. The concentrate was then purified by flash column chromatography to obtain metal-chelated tetramic acids which were then re-dissolved in DCM, washed with 10% citric acid solution (aq.), dried over Na<sub>2</sub>SO<sub>4</sub>, filtered, and then concentrated *in-vacuo* to obtain the desired product **25a-s**.

### Ethyl (1S\*,3R\*,7aR\*,Z)-3-(tert-butyl)-6-(hydroxy(phenyl)methylene)-5,7-dioxo-1-phenyldihydro-1H,3H-pyrrolo[1,2-c]oxazole-7a(5H)-carboxylate **25a**

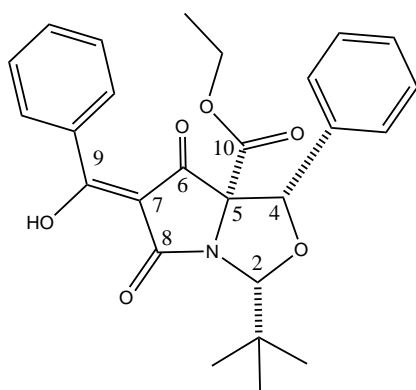

Yield (131 mg, 32%); Red oil; R<sub>f</sub> (100% EtOAc) 0.48;  $\nu_{\max}$ /cm<sup>-1</sup> 2961 (C-H), 1760 (C=O), 1712 (C=O), 1652 (C=O), 1592 (C=C);  $\delta_{\text{H}}$  (400 MHz, CDCl<sub>3</sub>) 1.02 (3H, t, *J*=7.1 Hz, OCH<sub>2</sub>CH<sub>3</sub>), 1.17 (9H, s, C(CH<sub>3</sub>)<sub>3</sub>), 4.02 (2H, q, *J*=7.2 Hz, OCH<sub>2</sub>CH<sub>3</sub>), 4.89 (1H, s, H4), 5.10 (1H, s, H2), 7.36 (3H, m, Ar-H), 7.57 (4H, m, Ar-H), 7.68 (1H, m, Ar-H), 8.24 (2H, m, Ar-H);  $\delta_{\text{C}}$  (101 MHz, CDCl<sub>3</sub>) 13.7 (OCH<sub>2</sub>CH<sub>3</sub>), 25.5 ((CH<sub>3</sub>)<sub>3</sub>), 35.6 (C(CH<sub>3</sub>)<sub>3</sub>), 61.9 (OCH<sub>2</sub>CH<sub>3</sub>), 78.0 (C5), 80.9

(C4), 97.2 (C2), 100.3 (C7), 126.5 (Ar-C), 127.8 (Ar-C), 127.9 (Ar-C), 128.5 (Ar-C), 130.3 (Ar-C), 131.1 (Ar-C), 134.8 (Ar-C), 134.9 (Ar-C), 165.5 (C10), 182.4 (C8), 183.7 (C9), 186.8 (C6); LRMS (ESI<sup>-</sup>) *m/z*: 448.1 ([M – H]<sup>-</sup> 94%); HRMS (ESI<sup>-</sup>) *m/z*: [M – H]<sup>-</sup> calcd. for C<sub>26</sub>H<sub>26</sub>NO<sub>6</sub>, 448.1766, found 448.1758.

**Ethyl (1*S*\*,3*R*\*,7*aR*\*,*Z*)-3-(*tert*-butyl)-6-(hydroxy(*p*-tolyl)methylene)-5,7-dioxo-1-phenyldihydro-1*H*,3*H*-pyrrolo[1,2-*c*]oxazole-7*a*(5*H*)-carboxylate 25b**

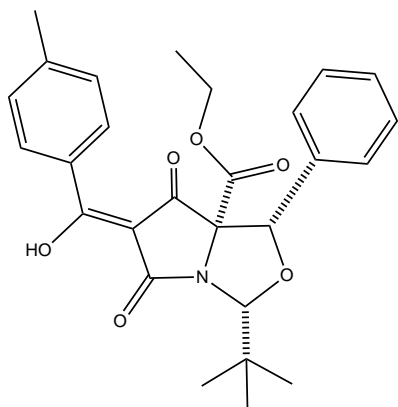

Yield (112 mg, 26%); Orange oil;  $R_f$  (100% EtOAc) 0.58;  $\nu_{\max}/\text{cm}^{-1}$  2960 (C-H), 1761 (C=O), 1737 (C=O), 1710 (C=O), 1651 (C=O), 1588 (C=C);  $\delta_H$  (400 MHz,  $\text{CDCl}_3$ ) 1.02 (3H, t,  $J=7.2$  Hz,  $\text{OCH}_2\text{CH}_3$ ), 1.16 (9H, s,  $\text{C}(\text{CH}_3)_3$ ), 2.48 (3H, s,  $\text{CH}_3$ ), 4.01 (2H, dq,  $J=2.0$  Hz, 7.2 Hz,  $\text{OCH}_2\text{CH}_3$ ), 4.87 (1H, s, H4), 5.08 (1H, s, H2), 7.31-7.42 (5H, m, Ar-H), 7.58 (2H, d,  $J=7.4$  Hz, Ar-H), 8.18 (2H, d,  $J=7.9$  Hz, Ar-H);  $\delta_C$  (101 MHz,  $\text{CDCl}_3$ ) 13.7 ( $\text{OCH}_2\text{CH}_3$ ), 22.1 ( $\text{CH}_3$ ), 25.5 ( $(\text{CH}_3)_3$ ), 35.6 ( $\text{C}(\text{CH}_3)_3$ ), 61.9 ( $\text{OCH}_2\text{CH}_3$ ), 77.9 (C5), 81.0 (C4), 97.2 (C2), 99.9 (C7), 126.5

(Ar-C), 127.8 (Ar-C), 127.9 (Ar-C), 128.4 (Ar-C), 129.2 (Ar-C), 130.5 (Ar-C), 135.0 (Ar-C), 146.4 (Ar-C), 165.6 (C10), 182.6 (C8), 183.6 (C9), 186.9 (C6); LRMS ( $\text{ESI}^-$ )  $m/z$ : 462.1 ( $[\text{M} - \text{H}]^-$  100%); HRMS ( $\text{ESI}^-$ )  $m/z$ :  $[\text{M} - \text{H}]^-$  calcd. for  $\text{C}_{27}\text{H}_{28}\text{NO}_6$ , 462.1922, found 462.1914.

**Ethyl (1*S*\*,3*R*\*,7*aR*\*,*Z*)-3-(*tert*-butyl)-6-(hydroxy(4-methoxyphenyl)methylene)-5,7-dioxo-1-phenyldihydro-1*H*,3*H*-pyrrolo[1,2-*c*]oxazole-7*a*(5*H*)-carboxylate 25c**

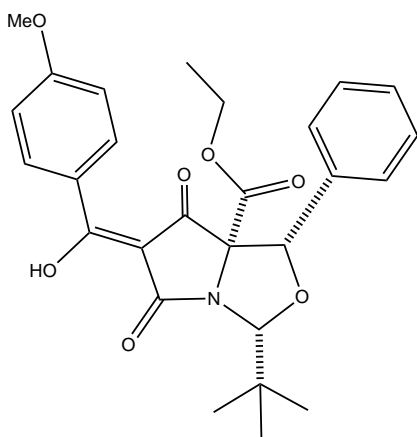

Yield (89 mg, 18%); Orange solid/oil;  $R_f$  (100% EtOAc) 0.53;  $\nu_{\max}/\text{cm}^{-1}$  2961 (C-H), 1759 (C=O), 1736 (C=O), 1705 (C=O), 1650 (C=O), 1584 (C=C);  $\delta_H$  (400 MHz,  $\text{CDCl}_3$ ) 0.99 (3H, t,  $J=7.1$  Hz,  $\text{OCH}_2\text{CH}_3$ ), 1.13 (9H, s,  $\text{C}(\text{CH}_3)_3$ ), 3.90 (3H, s,  $\text{OCH}_3$ ), 3.98 (2H, q,  $J=7.1$  Hz,  $\text{OCH}_2\text{CH}_3$ ), 4.84 (1H, s, H4), 5.05 (1H, s, H2), 7.00 (2H, d,  $J=9.0$  Hz, Ar-H), 7.28-7.37 (3H, m, Ar-H), 7.57 (2H, m, Ar-H), 8.35 (2H, d,  $J=9.0$  Hz, Ar-H);  $\delta_C$  (101 MHz,  $\text{CDCl}_3$ ) 13.7 ( $\text{OCH}_2\text{CH}_3$ ), 25.5 ( $(\text{CH}_3)_3$ ), 35.6 ( $\text{C}(\text{CH}_3)_3$ ), 55.7 ( $\text{OCH}_3$ ), 61.9 ( $\text{OCH}_2\text{CH}_3$ ), 77.8 (C5), 81.1

(C4), 97.2 (C2), 99.2 (C7), 114.0 (Ar-C), 126.6 (Ar-C), 127.8 (Ar-C), 127.9 (Ar-C), 133.2 (Ar-C), 135.1 (Ar-C), 165.4 (Ar-C), 165.7 (C10), 182.8 (C8), 183.0 (C9), 187.0 (C6); LRMS ( $\text{ESI}^-$ )  $m/z$ : 478.1 ( $[\text{M} - \text{H}]^-$  51%); HRMS ( $\text{ESI}^-$ )  $m/z$ :  $[\text{M} - \text{H}]^-$  calcd. for  $\text{C}_{27}\text{H}_{28}\text{NO}_7$ , 478.1871, found 478.1861.

**Ethyl (1*S*\*,3*R*\*,7*aR*\*,*Z*)-3-(*tert*-butyl)-6-((4-chlorophenyl)(hydroxy)methylene)-5,7-dioxo-1-phenyldihydro-1*H*,3*H*-pyrrolo[1,2-*c*]oxazole-7*a*(5*H*)-carboxylate 25d**

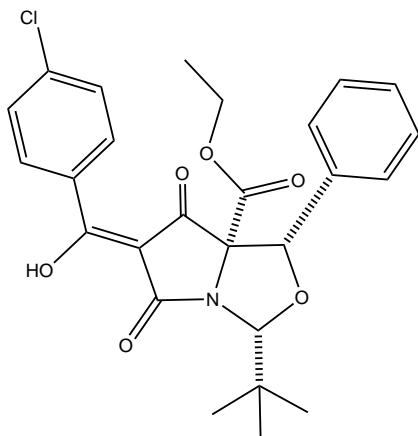

Yield (206 mg, 39%); Red solid; m.p. 42-47°C;  $R_f$  (100% EtOAc) 0.45;  $\nu_{\max}/\text{cm}^{-1}$  2961 (C-H), 1710 (C=O), 1652 (C=O), 1588 (C=C);  $\delta_H$  (400 MHz,  $\text{CDCl}_3$ ) 1.02 (3H, t,  $J=7.1$  Hz,  $\text{OCH}_2\text{CH}_3$ ), 1.17 (9H, s,  $\text{C}(\text{CH}_3)_3$ ), 4.01 (2H, m,  $\text{OCH}_2\text{CH}_3$ ), 4.88 (1H, s, H4), 5.09 (1H, s, H2), 7.33-7.41 (3H, m, Ar-H), 7.53 (2H, d,  $J=8.7$  Hz, Ar-H), 7.58 (2H, d,  $J=7.4$  Hz, Ar-H), 8.25 (2H, d,  $J=8.2$  Hz, Ar-H);  $\delta_C$  (101 MHz,  $\text{CDCl}_3$ ) 13.6 ( $\text{OCH}_2\text{CH}_3$ ), 25.5 ( $(\text{CH}_3)_3$ ), 35.6 ( $\text{C}(\text{CH}_3)_3$ ), 62.0 ( $\text{OCH}_2\text{CH}_3$ ), 77.9 (C5), 81.0 (C4), 97.3 (C2), 100.4 (C7), 126.5 (Ar-C),

127.8 (Ar-C), 128.0 (Ar-C), 128.9 (Ar-C), 129.4 (Ar-C), 131.7 (Ar-C), 134.8 (Ar-C), 141.3 (Ar-C), 165.3 (C10), 182.2 (C8), 182.2 (C9), 186.9 (C6); LRMS (ESI<sup>-</sup>)  $m/z$ : 482.1 ( $[\text{M}^{35} - \text{H}]^-$  100%), 484.1 ( $[\text{M}^{37} - \text{H}]^-$  36%); HRMS (ESI<sup>-</sup>)  $m/z$ :  $[\text{M}^{35} - \text{H}]^-$  calcd. for  $\text{C}_{26}\text{H}_{25}\text{NO}_6\text{Cl}$ , 482.1376, found 482.1369;  $[\text{M}^{37} - \text{H}]^-$  calcd. for  $\text{C}_{26}\text{H}_{25}\text{NO}_6\text{Cl}$ , 484.1347, found 484.1344.

**Ethyl (1*S*\*,3*R*\*,7*aR*\*,*Z*)-6-((4-bromophenyl)(hydroxy)methylene)-3-(*tert*-butyl)-5,7-dioxo-1-phenyldihydro-1*H*,3*H*-pyrrolo[1,2-*c*]oxazole-7*a*(5*H*)-carboxylate 25e**

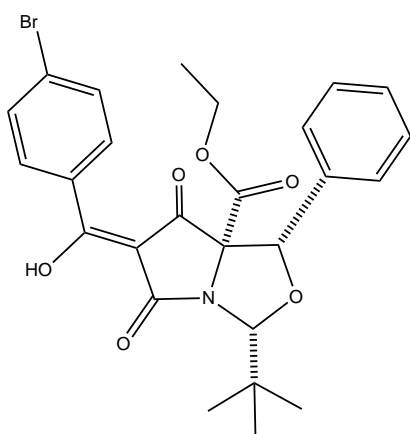

Yield (181 mg, 35%); Orange solid; m.p. 43-48°C;  $R_f$  (100% EtOAc) 0.55;  $\nu_{\max}/\text{cm}^{-1}$  2961 (C-H), 1759 (C=O), 1735 (C=O), 1711 (C=O), 1651 (C=O), 1586 (C=C);  $\delta_H$  (400 MHz,  $\text{CDCl}_3$ ) 1.01 (3H, t,  $J=7.1$  Hz,  $\text{OCH}_2\text{CH}_3$ ), 1.16 (9H, s,  $\text{C}(\text{CH}_3)_3$ ), 4.01 (2H, m,  $\text{OCH}_2\text{CH}_3$ ), 4.88 (1H, s, H4), 5.08 (1H, s, H2), 7.34-7.41 (3H, m, Ar-H), 7.57 (2H, d,  $J=7.3$  Hz, Ar-H), 7.69 (2H, d,  $J=8.7$  Hz, Ar-H), 8.15 (2H, d,  $J=8.5$  Hz, Ar-H);  $\delta_C$  (101 MHz,  $\text{CDCl}_3$ ) 13.6 ( $\text{OCH}_2\text{CH}_3$ ), 25.5 ( $(\text{CH}_3)_3$ ), 35.6 ( $\text{C}(\text{CH}_3)_3$ ), 62.0 ( $\text{OCH}_2\text{CH}_3$ ), 77.9 (C5), 81.0 (C4), 97.3 (C2),

126.5 (Ar-C), 127.8 (Ar-C), 128.0 (Ar-C), 129.9 (Ar-C), 130.2 (Ar-C), 131.8 (Ar-C), 131.9 (Ar-C), 134.8 (Ar-C), 165.3 (C10), 182.5 (C8), 182.5 (C9), 187.0 (C6); LRMS (ESI<sup>-</sup>)  $m/z$ : 526.0 ( $[\text{M}^{79} - \text{H}]^-$  95%), 528.0 ( $[\text{M}^{81} - \text{H}]^-$  97%); HRMS (ESI<sup>-</sup>)  $m/z$ :  $[\text{M}^{79} - \text{H}]^-$  calcd. for  $\text{C}_{26}\text{H}_{25}\text{NO}_6\text{Br}$ , 526.0871, found 526.0863;  $[\text{M}^{81} - \text{H}]^-$  calcd. for  $\text{C}_{26}\text{H}_{25}\text{NO}_6\text{Br}$ , 528.0851, found 528.0844.



**Ethyl (1*S*\*,3*R*\*,7*aR*\*,*Z*)-3-(*tert*-butyl)-6-(hydroxy(4-iodophenyl)methylene)-5,7-dioxo-1-phenyldihydro-1*H*,3*H*-pyrrolo[1,2-*c*]oxazole-7*a*(5*H*)-carboxylate 25f**

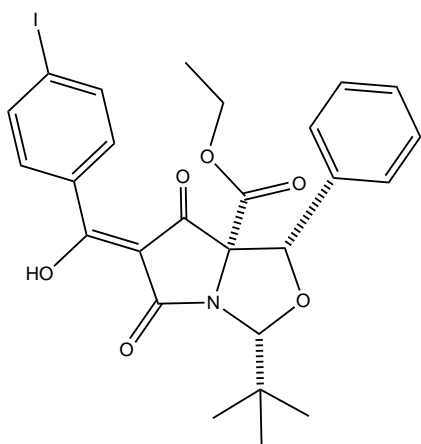

Yield (224 mg, 37%); Pink foamy solid/oil;  $R_f$  (100% EtOAc) 0.65;  $\nu_{\max}/\text{cm}^{-1}$  3320 (O-H), 2932 (C-H), 2855 (C-H), 1760 (C=O), 1713 (C=O), 1653 (C=O), 1584 (C=C);  $\delta_H$  (500 MHz,  $\text{CDCl}_3$ ) 0.98 (3H, t,  $J=7.2$  Hz,  $\text{OCH}_2\text{CH}_3$ ), 1.12 (9H, s,  $\text{C}(\text{CH}_3)_3$ ), 3.97 (2H, dq,  $J=2.5$  Hz, 7.2 Hz,  $\text{OCH}_2\text{CH}_3$ ), 4.85 (1H, s, H4), 5.06 (1H, s, H2), 7.29-7.39 (3H, m, Ar-H), 7.52 (2H, d,  $J=8.6$  Hz, Ar-H), 7.89 (2H, d,  $J=8.5$  Hz, Ar-H), 7.94 (2H, d,  $J=8.5$  Hz, Ar-H);  $\delta_C$  (126 MHz,  $\text{CDCl}_3$ ) 13.7 ( $\text{OCH}_2\text{CH}_3$ ), 25.5 ( $(\text{CH}_3)_3$ ), 35.7 ( $\text{C}(\text{CH}_3)_3$ ), 62.1 ( $\text{OCH}_2\text{CH}_3$ ), 78.1 (C5), 81.0

(C4), 97.3 (C2), 100.6 (Ar-C), 103.3 (C7), 126.5 (Ar-C), 127.9 (Ar-C), 128.1 (Ar-C), 131.4 (Ar-C), 134.8 (Ar-C), 138.0 (Ar-C), 165.4 (C10), 182.2 (C8), 182.7 (C9), 186.9 (C6); LRMS ( $\text{ESI}^-$ )  $m/z$ : 574.0 ( $[\text{M} - \text{H}]^-$  96%); HRMS ( $\text{ESI}^-$ )  $m/z$ :  $[\text{M} - \text{H}]^-$  calcd. for  $\text{C}_{26}\text{H}_{25}\text{NO}_6$ , 574.0732, found 574.0723.

**Ethyl (1*S*\*,3*R*\*,7*aR*\*,*Z*)-3-(*tert*-butyl)-6-(hydroxy(4-nitrophenyl)methylene)-5,7-dioxo-1-phenyldihydro-1*H*,3*H*-pyrrolo[1,2-*c*]oxazole-7*a*(5*H*)-carboxylate 25g**

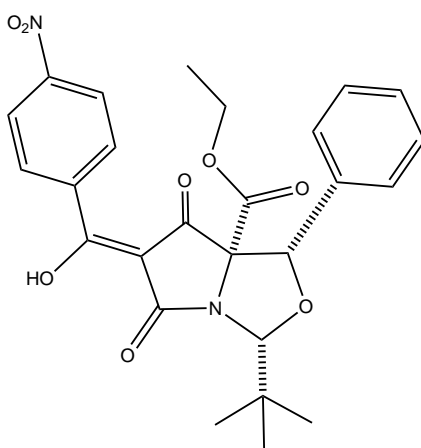

Yield (159 mg, 30%); Red oil/solid; m.p. 160-164°C;  $R_f$  (100% EtOAc) 0.60;  $\nu_{\max}/\text{cm}^{-1}$  2962 (C-H), 1716 (C=O), 1654 (C=O), 1612 (C=O), 1568 (C=C);  $\delta_H$  (400 MHz,  $\text{CDCl}_3$ ) 0.98 (3H, t,  $J=7.1$  Hz,  $\text{OCH}_2\text{CH}_3$ ), 1.13 (9H, s,  $\text{C}(\text{CH}_3)_3$ ), 3.98 (2H, dq,  $J=3.9$  Hz, 7.1 Hz,  $\text{OCH}_2\text{CH}_3$ ), 4.88 (1H, s, H4), 5.07 (1H, s, H2), 7.31-7.37 (3H, m, Ar-H), 7.52 (2H, d,  $J=7.2$  Hz, Ar-H), 8.34 (4H, s, Ar-H), 11.38 (1H, br s, OH);  $\delta_C$  (101 MHz,  $\text{CDCl}_3$ ) 13.6 ( $\text{OCH}_2\text{CH}_3$ ), 25.5 ( $(\text{CH}_3)_3$ ), 35.6 ( $\text{C}(\text{CH}_3)_3$ ), 62.2 ( $\text{OCH}_2\text{CH}_3$ ), 78.1 (C5), 81.0 (C4), 97.5 (C2), 123.4 (Ar-

C), 126.4 (Ar-C), 127.9 (Ar-C), 128.1 (Ar-C), 131.3 (Ar-C), 134.5 (Ar-C), 136.5 (Ar-C), 150.9 (Ar-C), 165.1 (C10); LRMS ( $\text{ESI}^-$ )  $m/z$ : 493.1 ( $[\text{M} - \text{H}]^-$  94%); HRMS ( $\text{ESI}^-$ )  $m/z$ :  $[\text{M} - \text{H}]^-$  calcd. for  $\text{C}_{26}\text{H}_{25}\text{N}_2\text{O}_8$ , 493.1616, found 493.1609.

**Ethyl (1*S*\*,3*R*\*,7*aR*\*,*Z*)-3-(*tert*-butyl)-6-(hydroxy(4-(trifluoromethyl)phenyl)methylene)-5,7-dioxo-1-phenyldihydro-1*H*,3*H*-pyrrolo[1,2-*c*]oxazole-7*a*(5*H*)-carboxylate 25h**

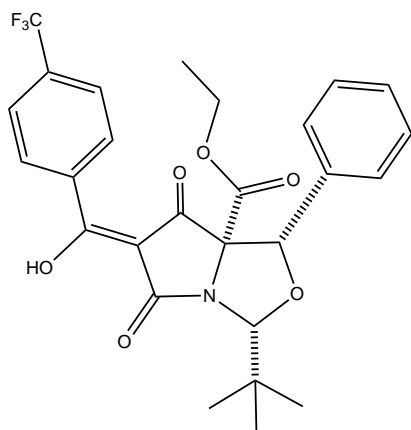

Yield (190 mg, 41%); Orange oil;  $R_f$  (100% EtOAc) 0.63;  $\nu_{\max}/\text{cm}^{-1}$  2963 (C-H), 1715 (C=O), 1653 (C=O), 1596 (C=C);  $\delta_{\text{H}}$  (400 MHz,  $\text{CDCl}_3$ ) 0.98 (3H, t,  $J=7.1$  Hz,  $\text{OCH}_2\text{CH}_3$ ), 1.14 (9H, s,  $\text{C}(\text{CH}_3)_3$ ), 3.99 (2H, m,  $\text{OCH}_2\text{CH}_3$ ), 4.87 (1H, s, H4), 5.07 (1H, s, H2), 7.32-7.38 (3H, m, Ar-H), 7.54 (2H, d,  $J=8.0$  Hz, Ar-H), 7.79 (2H, d,  $J=8.3$  Hz, Ar-H), 8.30 (2H, d,  $J=8.2$  Hz, Ar-H);  $\delta_{\text{C}}$  (101 MHz,  $\text{CDCl}_3$ ) 13.6 ( $\text{OCH}_2\text{CH}_3$ ), 25.5 ( $(\text{CH}_3)_3$ ), 35.6 ( $\text{C}(\text{CH}_3)_3$ ), 62.1 ( $\text{OCH}_2\text{CH}_3$ ), 78.1 (C5), 81.0 (C4), 97.4 (C2), 125.4 (q,  $J=3.7$  Hz, Ar-C), 126.5 (Ar-C), 127.9 (Ar-

C), 128.1 (Ar-C), 130.6 (Ar-C), 134.7 (Ar-C), 165.2 (C10), 182.0 (C8), 182.0 (C9), 186.8 (C6);  $\delta_{\text{F}}$  (376 MHz,  $\text{CDCl}_3$ ) -63.36; LRMS (ESI<sup>-</sup>)  $m/z$ : 516.1 ( $[\text{M} - \text{H}]^-$  98%); HRMS (ESI<sup>-</sup>)  $m/z$ :  $[\text{M} - \text{H}]^-$  calcd. for  $\text{C}_{27}\text{H}_{25}\text{NO}_6\text{F}_3$ , 516.1639, found 516.1628.

**Ethyl (1*S*\*,3*R*\*,7*aR*\*,*Z*)-3-(*tert*-butyl)-6-(hydroxy(3-methoxyphenyl)methylene)-5,7-dioxo-1-phenyldihydro-1*H*,3*H*-pyrrolo[1,2-*c*]oxazole-7*a*(5*H*)-carboxylate 25i**

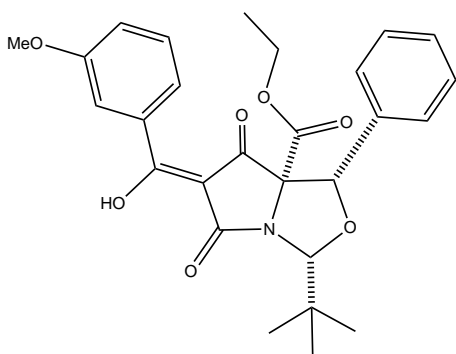

Yield (198 mg, 44%); Orange oil;  $R_f$  (100% EtOAc) 0.45;  $\nu_{\max}/\text{cm}^{-1}$  2961 (C-H), 1760 (C=O), 1734 (C=O), 1711 (C=O), 1653 (C=O), 1592 (C=C);  $\delta_{\text{H}}$  (400 MHz,  $\text{CDCl}_3$ ) 1.00 (3H, t,  $J=7.1$  Hz,  $\text{OCH}_2\text{CH}_3$ ), 1.13 (9H, s,  $\text{C}(\text{CH}_3)_3$ ), 3.88 (3H, s,  $\text{OCH}_3$ ), 3.99 (2H, q,  $J=7.1$  Hz,  $\text{OCH}_2\text{CH}_3$ ), 4.84 (1H, s, H4), 5.06 (1H, s, H2), 7.20 (1H, ddd,  $J=1.0$  Hz, 2.6 Hz, 8.3 Hz, Ar-H), 7.28-7.39 (3H, m, Ar-H), 7.43 (1H, t,  $J=8.0$  Hz, Ar-H), 7.55 (2H, d,  $J=7.3$  Hz, Ar-H),

7.80 (1H, m, Ar-H), 7.85 (1H, d,  $J=7.8$  Hz, Ar-H);  $\delta_{\text{C}}$  (101 MHz,  $\text{CDCl}_3$ ) 13.7 ( $\text{OCH}_2\text{CH}_3$ ), 25.4 ( $(\text{CH}_3)_3$ ), 35.6 ( $\text{C}(\text{CH}_3)_3$ ), 55.6 ( $\text{OCH}_3$ ), 61.9 ( $\text{OCH}_2\text{CH}_3$ ), 77.9 (C5), 80.9 (C4), 97.2 (C2), 100.3 (C7), 114.6 (Ar-C), 121.4 (Ar-C), 122.8 (Ar-C), 126.6 (Ar-C), 127.8 (Ar-C), 127.9 (Ar-C), 129.5 (Ar-C), 132.3 (Ar-C), 134.9 (Ar-C), 159.5 (Ar-C), 165.5 (C10), 182.5 (C8), 183.5 (C9), 186.7 (C6); LRMS (ESI<sup>-</sup>)  $m/z$ : 478.1 ( $[\text{M} - \text{H}]^-$  96%); HRMS (ESI<sup>-</sup>)  $m/z$ :  $[\text{M} - \text{H}]^-$  calcd. for  $\text{C}_{27}\text{H}_{28}\text{NO}_7$ , 478.1871, found 478.1867.

**Ethyl (1S\*,3R\*,7aR\*,Z)-6-((2-bromophenyl)(hydroxy)methylene)-3-(tert-butyl)-5,7-dioxo-1-phenyldihydro-1H,3H-pyrrolo[1,2-c]oxazole-7a(5H)-carboxylate 25j**

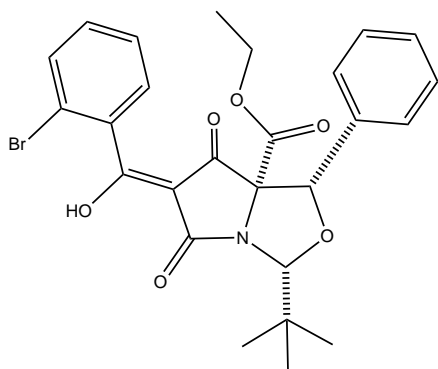

Yield (84 mg, 12%); Orange oil;  $R_f$  (100% EtOAc) 0.70;  $\nu_{\max}/\text{cm}^{-1}$  2961 (C-H), 1761 (C=O), 1725 (C=O), 1656 (C=O), 1606 (C=C);  $\delta_H$  (400 MHz,  $\text{CDCl}_3$ ) 0.96 (3H, t,  $J=7.1$  Hz,  $\text{OCH}_2\text{CH}_3$ ), 1.12 (9H, s,  $\text{C}(\text{CH}_3)_3$ ), 3.94 (2H, dq,  $J=1.2$  Hz, 7.1 Hz,  $\text{OCH}_2\text{CH}_3$ ), 4.88 (1H, s, H4), 5.08 (1H, s, H2), 7.29-7.53 (8H, m, Ar-H), 7.70 (1H, dd,  $J=1.3$  Hz, 7.8 Hz, Ar-H), 11.40 (1H, br s, OH);  $\delta_C$  (101 MHz,  $\text{CDCl}_3$ ) 13.7 ( $\text{OCH}_2\text{CH}_3$ ), 25.5 ( $(\text{CH}_3)_3$ ), 35.7 ( $\text{C}(\text{CH}_3)_3$ ), 62.0 ( $\text{OCH}_2\text{CH}_3$ ), 80.7 (C4), 97.2 (C2), 126.4 (Ar-C), 127.4 (Ar-C), 127.8 (Ar-C), 127.9 (Ar-C), 130.4 (Ar-C), 133.0 (Ar-C), 133.6 (Ar-C), 134.8 (Ar-C), 165.1 (C10); LRMS (ESI<sup>-</sup>)  $m/z$ : 526.0 ( $[\text{M}^{79} - \text{H}]^-$  93%), 528.0 ( $[\text{M}^{81} - \text{H}]^-$  95%); HRMS (ESI<sup>-</sup>)  $m/z$ :  $[\text{M}^{79} - \text{H}]^-$  calcd. for  $\text{C}_{26}\text{H}_{25}\text{NO}_6\text{Br}$ , 526.0871, found 526.0863;  $[\text{M}^{81} - \text{H}]^-$  calcd. for  $\text{C}_{26}\text{H}_{25}\text{NO}_6\text{Br}$ , 528.0851, found 528.0844.

**Ethyl (1S\*,3R\*,7aR\*,Z)-3-(tert-butyl)-6-((3,5-dimethoxyphenyl)(hydroxy)methylene)-5,7-dioxo-1-phenyldihydro-1H,3H-pyrrolo[1,2-c]oxazole-7a(5H)-carboxylate 25k**

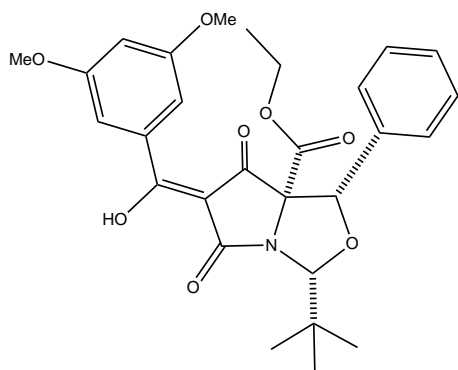

Yield (77 mg, 17%); Orange oil;  $R_f$  (100% EtOAc) 0.45;  $\nu_{\max}/\text{cm}^{-1}$  2961 (C-H), 1760 (C=O), 1736 (C=O), 1711 (C=O), 1653 (C=O), 1562 (C=C);  $\delta_H$  (400 MHz,  $\text{CDCl}_3$ ) 1.01 (3H, t,  $J=7.2$  Hz,  $\text{OCH}_2\text{CH}_3$ ), 1.12 (9H, s,  $\text{C}(\text{CH}_3)_3$ ), 3.86 (6H, s,  $\text{OCH}_3$ ,  $\text{OCH}_3$ ), 3.99 (2H, q,  $J=7.2$  Hz,  $\text{OCH}_2\text{CH}_3$ ), 4.84 (1H, s, H4), 5.06 (1H, s, H2), 6.75 (1H, t,  $J=2.3$  Hz, Ar-H), 7.28-7.60 (7H, m, Ar-H);  $\delta_C$  (101 MHz,  $\text{CDCl}_3$ ) 13.7 ( $\text{OCH}_2\text{CH}_3$ ), 25.5 ( $(\text{CH}_3)_3$ ), 35.7 ( $\text{C}(\text{CH}_3)_3$ ), 55.8 ( $\text{OCH}_3$ ), 61.9 ( $\text{OCH}_2\text{CH}_3$ ), 77.8 (C5), 81.0 (C4), 97.2 (C2), 100.4 (C7), 107.8 (Ar-C), 107.9 (Ar-C), 126.6 (Ar-C), 127.8 (Ar-C), 128.0 (Ar-C), 132.8 (Ar-C), 134.9 (Ar-C), 160.6 (Ar-C), 165.5 (C10), 182.7 (C8), 183.5 (C9), 186.6 (C6); LRMS (ESI<sup>-</sup>)  $m/z$ : 508.1 ( $[\text{M} - \text{H}]^-$  45%); HRMS (ESI<sup>-</sup>)  $m/z$ :  $[\text{M} - \text{H}]^-$  calcd. for  $\text{C}_{28}\text{H}_{30}\text{NO}_8$ , 508.1977, found 508.1968.

**Ethyl (1*S*\*,3*R*\*,7*aR*\*,*Z*)-3-(*tert*-butyl)-6-(hydroxy(thiophen-2-yl)methylene)-5,7-dioxo-1-phenyldihydro-1*H*,3*H*-pyrrolo[1,2-*c*]oxazole-7*a*(5*H*)-carboxylate 25*l***

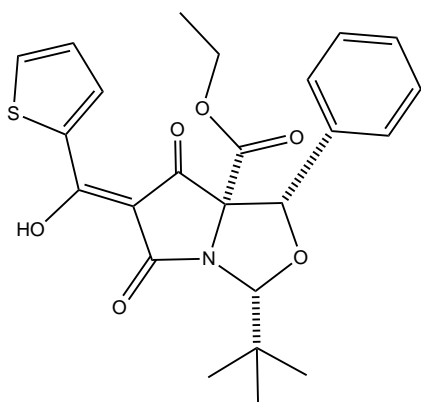

Yield (57 mg, 13%); Yellow foamy solid; m.p. 80-84°C;  $R_f$  (100% EtOAc)

0.60;  $\nu_{\max}/\text{cm}^{-1}$  3400 (O-H), 2974 (C-H), 2934 (C-H), 1758 (C=O), 1736

(C=O), 1704 (C=O), 1652 (C=O), 1558 (C=C);  $\delta_H$  (400 MHz,  $\text{CDCl}_3$ ) 0.90 (3H,

t,  $J=7.1$  Hz,  $\text{OCH}_2\text{CH}_3$ ), 1.04 (9H, s,  $\text{C}(\text{CH}_3)_3$ ), 3.89 (2H, m,  $\text{OCH}_2\text{CH}_3$ ), 4.78

(1H, s, H4), 4.97 (1H, s, H2), 7.20 (1H, dd,  $J=4.1$  Hz, 4.9 Hz, Ar-H), 7.22-7.32

(3H, m, Ar-H), 7.49 (2H, m, Ar-H), 7.82 (1H, dd,  $J=1.1$  Hz, 4.9 Hz, Ar-H), 9.19

(1H, dd,  $J=1.2$  Hz, 4.1 Hz, Ar-H);  $\delta_C$  (101 MHz,  $\text{CDCl}_3$ ) 13.7 ( $\text{OCH}_2\text{CH}_3$ ), 25.5 ( $(\text{CH}_3)_3$ ), 35.7 ( $\text{C}(\text{CH}_3)_3$ ), 62.0 ( $\text{OCH}_2\text{CH}_3$ ),

81.2 (C4), 97.3 (C2), 126.5 (Ar-C), 126.6 (Ar-C), 127.9 (Ar-C), 128.0 (Ar-C), 129.3 (Ar-C), 135.0 (Ar-C), 137.6 (Ar-

C), 138.6 (Ar-C), 165.5 (C10), 182.8 (C8), 182.8 (C9), 186.6 (C6); LRMS (ESI<sup>-</sup>)  $m/z$ : 454.1 ( $[\text{M} - \text{H}]^-$  26%); HRMS

(ESI<sup>-</sup>)  $m/z$ :  $[\text{M} - \text{H}]^-$  calcd. for  $\text{C}_{24}\text{H}_{24}\text{NO}_6\text{S}$ , 454.1330, found 454.1320.

**Ethyl (1*S*\*,3*R*\*,7*aR*\*,*Z*)-6-(2-bromo-1-hydroxyethylidene)-3-(*tert*-butyl)-5,7-dioxo-1-phenyldihydro-1*H*,3*H*-pyrrolo[1,2-*c*]oxazole-7*a*(5*H*)-carboxylate 25*m***

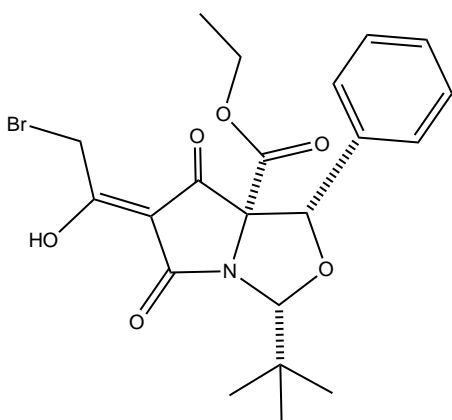

Yield (1.45 g, 37%); Orange semi-solid;  $R_f$  (100% EtOAc) 0.70;  $\nu_{\max}/\text{cm}^{-1}$

3305 (O-H), 2962 (C-H), 1721 (C=O), 1664 (C=O), 1606 (C=C);  $\delta_H$  (400

MHz,  $\text{CDCl}_3$ ) 0.97 (3H, t,  $J=7.2$  Hz,  $\text{OCH}_2\text{CH}_3$ ), 1.10 (9H, s,  $\text{C}(\text{CH}_3)_3$ ), 3.95

(2H, dq,  $J=4.3$  Hz, 6.8 Hz,  $\text{OCH}_2\text{CH}_3$ ), 4.41 (1H, d,  $J=10.8$  Hz,  $\text{CH}_2\text{Br}$ ), 4.50

(1H, d,  $J=10.9$  Hz,  $\text{CH}_2\text{Br}$ ), 4.84 (1H, s, H4), 5.02 (1H, s, H2), 7.31-7.40

(3H, m, Ar-H), 7.52 (2H, d,  $J=7.1$  Hz, Ar-H), 9.10 (1H, br s, OH);  $\delta_C$  (101

MHz,  $\text{CDCl}_3$ ) 13.6 ( $\text{OCH}_2\text{CH}_3$ ), 23.5 ( $\text{CH}_2\text{Br}$ ), 25.4 ( $(\text{CH}_3)_3$ ), 35.6 ( $\text{C}(\text{CH}_3)_3$ ),

62.2 ( $\text{OCH}_2\text{CH}_3$ ), 79.1 (C5), 80.7 (C4), 97.3 (C2), 102.1 (C7), 126.4 (Ar-C), 128.0 (Ar-C), 128.2 (Ar-C), 134.5 (Ar-C),

164.8 (C10), 179.3 (C8), 181.9 (C9), 187.4 (C6); LRMS (ESI<sup>-</sup>)  $m/z$ : 464.0 ( $[\text{M}^{79} - \text{H}]^-$  93%), 466.0 ( $[\text{M}^{81} - \text{H}]^-$  95%);

HRMS (ESI<sup>-</sup>)  $m/z$ :  $[\text{M}^{79} - \text{H}]^-$  calcd. for  $\text{C}_{21}\text{H}_{23}\text{NO}_6\text{Br}$ , 464.0714, found 464.0706;  $[\text{M}^{81} - \text{H}]^-$  calcd. for  $\text{C}_{21}\text{H}_{23}\text{NO}_6\text{Br}$ ,

466.0693, found 466.0686.

**Ethyl (1*S*\*,3*R*\*,7*aR*\*,*Z*)-3-(*tert*-butyl)-6-(cyclohexyl(hydroxy)methylene)-5,7-dioxo-1-phenyldihydro-1*H*,3*H*-pyrrolo[1,2-*c*]oxazole-7*a*(5*H*)-carboxylate 25n**

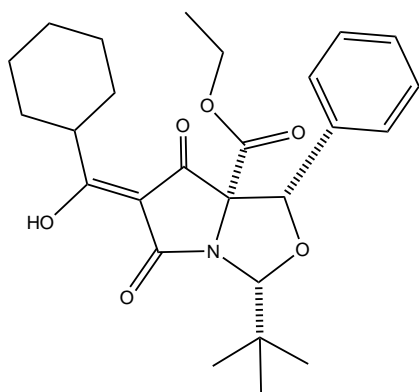

Yield (295 mg, 57%); Orange oil;  $R_f$  (100% EtOAc) 0.55;  $\nu_{\max}/\text{cm}^{-1}$  2934 (C-H), 1760 (C=O), 1711 (C=O), 1653 (C=O), 1591 (C=C);  $\delta_{\text{H}}$  (400 MHz,  $\text{CDCl}_3$ ) 0.98 (3H, t,  $J=7.1$  Hz,  $\text{OCH}_2\text{CH}_3$ ), 1.14 (9H, s,  $\text{C}(\text{CH}_3)_3$ ), 1.25-1.98 (10H, m, Cyclohexyl- $\text{CH}_2$ ), 3.50 (1H, m, Cyclohexyl-H), 3.98 (2H, m,  $\text{OCH}_2\text{CH}_3$ ), 4.83 (1H, s, H4), 5.02 (1H, s, H2), 7.33-7.42 (3H, m, Ar-H), 7.58 (2H, d,  $J=7.1$  Hz, Ar-H), 11.99 (1H, br s, OH);  $\delta_{\text{C}}$  (101 MHz,  $\text{CDCl}_3$ ) 13.5 ( $\text{OCH}_2\text{CH}_3$ ), 25.3 ( $(\text{CH}_3)_3$ ), 25.3 (Cyclohexyl-C), 25.6 (Cyclohexyl-C), 28.4 (Cyclohexyl-C), 35.4 ( $\text{C}(\text{CH}_3)_3$ ), 41.3 (Cyclohexyl-C), 61.7 ( $\text{OCH}_2\text{CH}_3$ ), 78.6 (C5), 80.6 (C4), 96.8 (C2), 100.1 (C7), 126.3 (Ar-C), 127.7 (Ar-C), 127.8 (Ar-C), 135.0 (Ar-C), 165.4 (C10), 180.8 (C8), 187.8 (C6), 196.1 (C9); LRMS (ESI<sup>-</sup>)  $m/z$ : 454.2 ( $[\text{M} - \text{H}]^-$  96%); HRMS (ESI<sup>-</sup>)  $m/z$ :  $[\text{M} - \text{H}]^-$  calcd. for  $\text{C}_{26}\text{H}_{32}\text{NO}_6$ , 454.2235, found 454.2227.

**Ethyl (1*S*\*,3*R*\*,7*aR*\*,*Z*)-3-(*tert*-butyl)-6-(2-cyclohexyl-1-hydroxyethylidene)-5,7-dioxo-1-phenyldihydro-1*H*,3*H*-pyrrolo[1,2-*c*]oxazole-7*a*(5*H*)-carboxylate 25o**

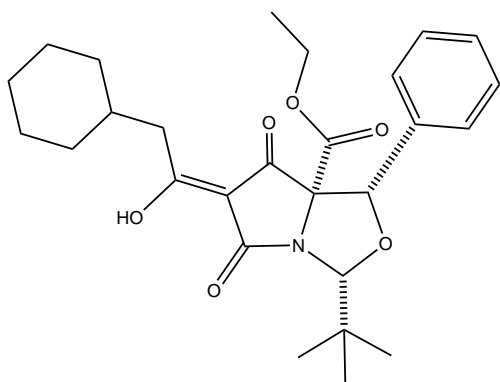

Yield (219 mg, 44%); Orange oil;  $R_f$  (100% EtOAc) 0.43;  $\nu_{\max}/\text{cm}^{-1}$  2926 (C-H), 2853 (C-H), 1763 (C=O), 1717 (C=O), 1655 (C=O), 1598 (C=C); AB:CD 22:78 by  $\delta_{\text{H}}$ -NMR;  $\delta_{\text{H}}$  (Major Tautomer) (400 MHz,  $\text{CDCl}_3$ ) 0.96 (3H, t,  $J=7.1$  Hz,  $\text{OCH}_2\text{CH}_3$ ), 1.09 (9H, s,  $\text{C}(\text{CH}_3)_3$ ), 1.11-1.33 (6H, m, Cyclohexyl- $\text{CH}_2$ ), 1.60-1.93 (5H, m, Cyclohexyl- $\text{CH}_2$ , CH), 2.71 (1H, dd,  $J=6.9$  Hz, 13.0 Hz,  $\text{CH}_2$ -Cyclohexyl), 2.96 (1H, dd,  $J=7.3$  Hz, 13.0 Hz,  $\text{CH}_2$ -Cyclohexyl), 3.94 (2H, dq,  $J=2.6$  Hz, 7.1 Hz,  $\text{OCH}_2\text{CH}_3$ ), 4.79 (1H, s, H4), 4.99 (1H, s, H2), 7.29-7.39 (3H, m, Ar-H), 7.54 (2H, m, Ar-H);  $\delta_{\text{C}}$  (Major Tautomer) (101 MHz,  $\text{CDCl}_3$ ) 13.6 ( $\text{OCH}_2\text{CH}_3$ ), 25.4 ( $(\text{CH}_3)_3$ ), 26.1 (Cyclohexyl-C), 26.1 (Cyclohexyl-C), 32.9 (Cyclohexyl-C), 33.2 (Cyclohexyl-C), 33.8 (Cyclohexyl-C), 35.5 ( $\text{C}(\text{CH}_3)_3$ ), 36.9 (Cyclohexyl-C), 40.4 ( $\text{CH}_2$ -Cyclohexyl), 61.8 ( $\text{OCH}_2\text{CH}_3$ ), 78.7 (C5), 80.6 (C4), 96.9 (C2), 102.5 (C7), 126.4 (Ar-C), 127.8 (Ar-C), 127.9 (Ar-C), 134.9 (Ar-C), 165.3 (C10), 180.2 (C8), 188.3 (C6), 191.7 (C9); LRMS (ESI<sup>-</sup>)  $m/z$ : 468.2 ( $[\text{M} - \text{H}]^-$  96%); HRMS (ESI<sup>-</sup>)  $m/z$ :  $[\text{M} - \text{H}]^-$  calcd. for  $\text{C}_{27}\text{H}_{34}\text{NO}_6$ , 468.2392, found 468.2383.

**Ethyl (1S\*,3R\*,7aR\*,Z)-6-(2-(adamantan-1-yl)-1-hydroxyethylidene)-3-(tert-butyl)-5,7-dioxo-1-phenyldihydro-1H,3H-pyrrolo[1,2-c]oxazole-7a(5H)-carboxylate 25p**

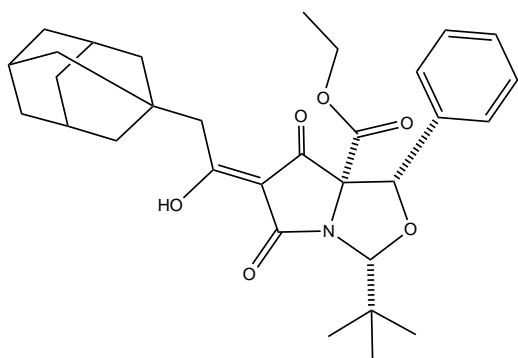

Yield (276 mg, 57%); Yellow foamy solid; m.p. 68-72°C;  $R_f$  (100% EtOAc) 0.30;  $\nu_{\max}/\text{cm}^{-1}$  3400 (O-H), 2904 (C-H), 2850 (C-H), 1763 (C=O), 1717 (C=O), 1653 (C=O), 1598 (C=C); AB:CD 15:85 by  $\delta_{\text{H}}$ -NMR;  $\delta_{\text{H}}$  (Major Tautomer) (400 MHz,  $\text{CDCl}_3$ ) 0.97 (3H, t,  $J=7.1$  Hz,  $\text{OCH}_2\text{CH}_3$ ), 1.08 (9H, s,  $\text{C}(\text{CH}_3)_3$ ), 1.65-1.70 (12H, m, Adamantyl- $\text{CH}_2$ ), 1.95-1.98 (3H, m, Adamantyl-CH), 2.48 (1H, d,  $J=11.7$  Hz,

$\text{CH}_2$ -Adamantyl), 3.00 (1H, d,  $J=11.7$  Hz,  $\text{CH}_2$ -Adamantyl), 3.94 (2H, m,  $\text{OCH}_2\text{CH}_3$ ), 4.79 (1H, s, H4), 5.00 (1H, s, H2), 7.29-7.39 (3H, m, Ar-H), 7.53 (2H, m, Ar-H);  $\delta_{\text{C}}$  (Major Tautomer) (101 MHz,  $\text{CDCl}_3$ ) 13.7 ( $\text{OCH}_2\text{CH}_3$ ), 25.4 ( $(\text{CH}_3)_3$ ), 29.0 (Adamantyl-C), 35.6 ( $\text{C}(\text{CH}_3)_3$ ), 36.7 (Adamantyl-C), 42.6 (Adamantyl-C), 46.5 ( $\text{CH}_2$ -Adamantyl), 49.4 (Adamantyl-C), 61.8 ( $\text{OCH}_2\text{CH}_3$ ), 78.5 (C5), 80.7 (C4), 96.9 (C2), 103.5 (C7), 126.4 (Ar-C), 127.9 (Ar-C), 128.0 (Ar-C), 134.9 (Ar-C), 165.4 (C10), 180.3 (C8), 188.6 (C6), 190.5 (C9); LRMS (ESI $^-$ )  $m/z$ : 520.2 ( $[\text{M} - \text{H}]^-$  96%); HRMS (ESI $^-$ )  $m/z$ :  $[\text{M} - \text{H}]^-$  calcd. for  $\text{C}_{31}\text{H}_{38}\text{NO}_6$ , 520.2705, found 520.2695.

**Ethyl (1S\*,3R\*,7aR\*,Z)-3-(tert-butyl)-6-(1-hydroxyethylidene)-5,7-dioxo-1-phenyldihydro-1H,3H-pyrrolo[1,2-c]oxazole-7a(5H)-carboxylate 25q**

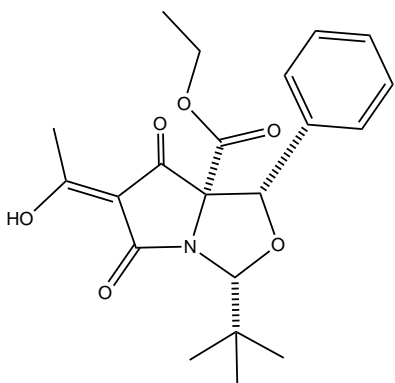

Yield (174 mg, 51%); Yellow oil;  $R_f$  (100% EtOAc) 0.18;  $\nu_{\max}/\text{cm}^{-1}$  2961 (C-H), 1762 (C=O), 1718 (C=O), 1656 (C=O), 1602 (C=C); AB:CD 21:79 by  $\delta_{\text{H}}$ -NMR;  $\delta_{\text{H}}$  (Major Tautomer) (400 MHz,  $\text{CDCl}_3$ ) 0.96 (3H, t,  $J=7.2$  Hz,  $\text{OCH}_2\text{CH}_3$ ), 1.09 (9H, s,  $\text{C}(\text{CH}_3)_3$ ), 2.54 (3H, s,  $\text{CH}_3$ ), 3.94 (2H, m,  $\text{OCH}_2\text{CH}_3$ ), 4.79 (1H, s, H4), 4.98 (1H, s, H2), 7.29-7.38 (3H, m, Ar-H), 7.52 (2H, m, Ar-H), 12.22 (1H, br s, OH);  $\delta_{\text{C}}$  (Major Tautomer) (101 MHz,  $\text{CDCl}_3$ ) 13.6 ( $\text{OCH}_2\text{CH}_3$ ), 20.1 ( $\text{CH}_3$ ), 25.4 ( $(\text{CH}_3)_3$ ), 35.5

( $\text{C}(\text{CH}_3)_3$ ), 61.9 ( $\text{OCH}_2\text{CH}_3$ ), 78.9 (C5), 80.7 (C4), 96.9 (C2), 102.3 (C7), 126.4 (Ar-C), 127.8 (Ar-C), 127.9 (Ar-C), 134.9 (Ar-C), 165.3 (C10), 179.9 (C8), 188.3 (C6), 188.5 (C9); LRMS (ESI $^-$ )  $m/z$ : 386.1 ( $[\text{M} - \text{H}]^-$  96%); HRMS (ESI $^-$ )  $m/z$ :  $[\text{M} - \text{H}]^-$  calcd. for  $\text{C}_{21}\text{H}_{24}\text{NO}_6$ , 386.1609, found 386.1602.

**Ethyl (1*S*\*,3*R*\*,7*aR*\*,*Z*)-3-(*tert*-butyl)-6-(1-hydroxyhexylidene)-5,7-dioxo-1-phenyldihydro-1*H*,3*H*-pyrrolo[1,2-*c*]oxazole-7*a*(5*H*)-carboxylate 25r**

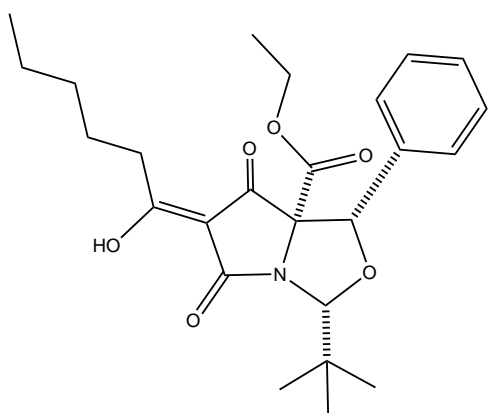

Yield (227 mg, 47%); Orange oil;  $R_f$  (100% EtOAc) 0.48;  $\nu_{\max}/\text{cm}^{-1}$  2959 (C-H), 2934 (C-H), 2872 (C-H), 1763 (C=O), 1738 (C=O), 1718 (C=O), 1656 (C=O), 1600 (C=C);  $\delta_{\text{H}}$  (Major Tautomer) (400 MHz,  $\text{CDCl}_3$ ) 0.91 (3H, t,  $J=7.0$  Hz, Hexyl- $\text{CH}_3$ ), 0.96 (3H, t,  $J=7.1$  Hz,  $\text{OCH}_2\text{CH}_3$ ), 1.09 (9H, s,  $\text{C}(\text{CH}_3)_3$ ), 1.32-1.42 (4H, m, Hexyl- $\text{CH}_2$ ), 1.73 (2H, qn,  $J=7.4$  Hz, Hexyl- $\text{CH}_2$ ), 2.86 (1H, dt,  $J=7.6$  Hz, 14.3 Hz, Hexyl- $\text{CH}_2$ ), 2.98 (1H, dt,  $J=7.6$  Hz, 13.8 Hz, Hexyl- $\text{CH}_2$ ), 3.94 (2H, dq,  $J=2.4$  Hz, 7.2 Hz,  $\text{OCH}_2\text{CH}_3$ ), 4.79 (1H, s, H4), 4.99 (1H, s, H2), 7.31-7.39 (3H, m, Ar-H), 7.53 (2H, m, Ar-H);  $\delta_{\text{C}}$  (Major Tautomer) (101 MHz,  $\text{CDCl}_3$ ) 13.6 (Hexyl- $\text{CH}_3$ ), 13.9 ( $\text{OCH}_2\text{CH}_3$ ), 22.4 (Hexyl- $\text{CH}_2$ ), 25.4 ( $(\text{CH}_3)_3$ ), 25.7 (Hexyl- $\text{CH}_2$ ), 31.4 (Hexyl- $\text{CH}_2$ ), 33.1 (Hexyl- $\text{CH}_2$ ), 35.5 ( $\text{C}(\text{CH}_3)_3$ ), 61.8 ( $\text{OCH}_2\text{CH}_3$ ), 78.7 (C5), 80.7 (C4), 96.9 (C2), 101.7 (C7), 126.4 (Ar-C), 127.8 (Ar-C), 127.9 (Ar-C), 134.9 (Ar-C), 165.4 (C10), 180.3 (C8), 188.1 (C6), 192.6 (C9); LRMS (ESI<sup>-</sup>)  $m/z$ : 442.1 ( $[\text{M} - \text{H}]^-$  95%); HRMS (ESI<sup>-</sup>)  $m/z$ :  $[\text{M} - \text{H}]^-$  calcd. for  $\text{C}_{25}\text{H}_{32}\text{NO}_6$ , 442.2235, found 442.2230.

**Ethyl (1*S*\*,3*R*\*,7*aR*\*,*Z*)-3-(*tert*-butyl)-6-(1-hydroxyhex-5-en-1-ylidene)-5,7-dioxo-1-phenyldihydro-1*H*,3*H*-pyrrolo[1,2-*c*]oxazole-7*a*(5*H*)-carboxylate 25s**

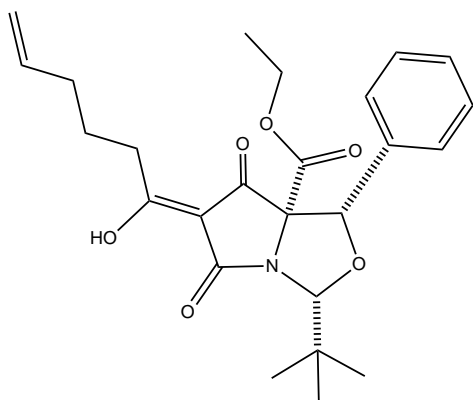

Yield (188 mg, 41%); Red oil;  $R_f$  (100% EtOAc) 0.38;  $\nu_{\max}/\text{cm}^{-1}$  2974 (C-H), 2960 (C-H), 2935 (C-H), 1762 (C=O), 1718 (C=O), 1656 (C=O), 1600 (C=C);  $\delta_{\text{H}}$  (Major Tautomer) (400 MHz,  $\text{CDCl}_3$ ) 0.96 (3H, t,  $J=7.1$  Hz,  $\text{OCH}_2\text{CH}_3$ ), 1.09 (9H, s,  $\text{C}(\text{CH}_3)_3$ ), 1.83 (2H, qn,  $J=7.5$  Hz, Hexenyl- $\text{CH}_2$ ), 2.18 (2H, q,  $J=7.4$  Hz, Hexenyl- $\text{CH}_2$ ), 2.89 (1H, dt,  $J=7.6$  Hz, 14.4 Hz, Hexenyl- $\text{CH}_2$ ), 2.99 (1H, dt,  $J=7.6$  Hz, 15.0 Hz, Hexenyl- $\text{CH}_2$ ), 3.94 (2H, dq,  $J=3.2$  Hz, 7.1 Hz,  $\text{OCH}_2\text{CH}_3$ ), 4.80 (1H, s, H4), 4.99 (1H, s, H2), 5.04 (2H, m,  $\text{CH}_2=\text{CH}$ ), 5.81 (1H, ddt,  $J=6.7$  Hz, 10.2 Hz, 17.0 Hz,  $\text{CH}_2=\text{CH}$ ), 7.30-7.39 (3H, m, Ar-H), 7.53 (2H, m, Ar-H);  $\delta_{\text{C}}$  (Major Tautomer) (101 MHz,  $\text{CDCl}_3$ ) 13.6 ( $\text{OCH}_2\text{CH}_3$ ), 25.4 ( $(\text{CH}_3)_3$ ), 25.4 (Hexenyl- $\text{CH}_2$ ), 32.6 (Hexenyl- $\text{CH}_2$ ), 33.2 (Hexenyl- $\text{CH}_2$ ), 35.5 ( $\text{C}(\text{CH}_3)_3$ ), 61.9 ( $\text{OCH}_2\text{CH}_3$ ), 78.7

(C5), 80.7 (C4), 96.9 (C2), 101.8 (C7), 115.9 (CH<sub>2</sub>=CH), 126.4 (Ar-C), 127.9 (Ar-C), 127.9 (Ar-C), 134.9 (Ar-C), 137.3 (CH<sub>2</sub>=CH), 165.3 (C10), 180.2 (C8), 188.1 (C6), 192.1 (C9); LRMS (ESI<sup>-</sup>) *m/z*: 440.1 ([M - H]<sup>-</sup> 100%); HRMS (ESI<sup>-</sup>) *m/z*: [M - H]<sup>-</sup> calcd. for C<sub>25</sub>H<sub>30</sub>NO<sub>6</sub>, 440.2079, found 440.2075.

### Diethyl 2-((*tert*-butoxycarbonyl)amino)malonate **27b**:<sup>24</sup>

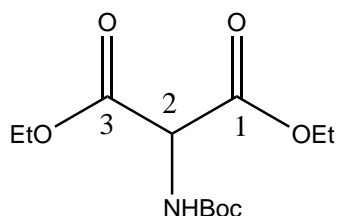

Diethyl aminomalonate.HCl **27a** (1 eq.) was dissolved in 1,4-dioxane (1.2 M) and cooled to 0°C. 1 M NaOH solution (aq.) (1 eq.) was added to this reaction mixture dropwise. Boc<sub>2</sub>O (1.1 eq.) in 1,4-dioxane (2.4 M) was subsequently added dropwise at 0°C and the mixture was left to stir at rt overnight. 1,4-Dioxane was then evaporated *in-vacuo* and added to this reaction mixture was EtOAc. After phase separation, the organic layer was washed with 1 M HCl solution (aq.), dried over Na<sub>2</sub>SO<sub>4</sub>, filtered and the solvent was removed *in-vacuo* and the crude product was purified by flash column chromatography to yield the desired Boc-protected malonate **27b** as a colourless oil. Yield (5.11 g, 79%); Colourless oil; R<sub>f</sub> (20% EtOAc in Pet. Ether 40:60) 0.45;  $\nu_{\max}/\text{cm}^{-1}$  2981 (C-H), 1742 (C=O), 1715 (C=O);  $\delta_{\text{H}}$  (400 MHz, CDCl<sub>3</sub>) 1.27 (6H, t, *J*=7.1 Hz, OCH<sub>2</sub>CH<sub>3</sub>, OCH<sub>2</sub>CH<sub>3</sub>), 1.43 (9H, s, (CH<sub>3</sub>)<sub>3</sub>), 4.24 (4H, m, OCH<sub>2</sub>CH<sub>3</sub>, OCH<sub>2</sub>CH<sub>3</sub>), 4.92 (1H, d, *J*=7.7 Hz, H2), 5.54 (1H, br s, NH); LRMS (ESI<sup>+</sup>) *m/z*: 298.0 ([M + Na]<sup>+</sup> 75%); HRMS (ESI<sup>+</sup>) *m/z*: [M + Na]<sup>+</sup> calcd. for C<sub>12</sub>H<sub>21</sub>NO<sub>6</sub>Na, 298.1261, found 298.1263.

### 2-((*tert*-butoxycarbonyl)amino)-3-ethoxy-3-oxopropanoic acid **27c**:<sup>12</sup>

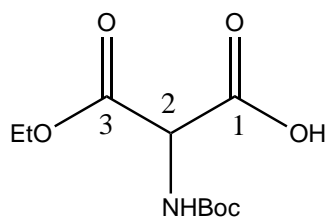

A solution of 4.5 M KOH (1 eq.) (aq.) was added dropwise to a solution of diethyl (*Boc*-amino)malonate **27b** (1 eq.) in ethanol (0.45 M) at 0°C. The reaction mixture was allowed to warm up to rt and stirred for 15 h. Ethanol was then evaporated *in-vacuo*, and Et<sub>2</sub>O was added to the reaction mixture and this was transferred to a separatory funnel. The aqueous layer was then acidified to pH 1 with 1 M HCl solution (aq.), then extracted with EtOAc. The organic layer was then washed with brine, dried over Na<sub>2</sub>SO<sub>4</sub>, filtered and the solvent was removed *in-vacuo* to obtain the carboxylic acid **27c** as a colourless oil and was used without further purification. Yield (3.89 g, 86%); Colourless oil that solidified to a white solid; m.p 83-86°C (lit.<sup>25</sup> 98-99°C);  $\nu_{\max}/\text{cm}^{-1}$  3309 (O-H), 2981 (C-H), 1720 (C=O), 1669 (C=O); 54:46 mixture of rotamers;  $\delta_{\text{H}}$  (400 MHz, CDCl<sub>3</sub>) 1.31 (3H, t, *J*=7.1 Hz, OCH<sub>2</sub>CH<sub>3</sub>), 1.43/1.44 (9H, s, C(CH<sub>3</sub>)<sub>3</sub>), 4.26/4.26 (2H, m, OCH<sub>2</sub>CH<sub>3</sub>), 4.77 (1H, d, *J*=5.0 Hz, H2)/4.98 (1H, d, *J*=7.5



Hz, H2), 5.65 (1H, d,  $J=7.5$  Hz, NH)/7.59 (1H, d,  $J=5.1$  Hz, NH), 8.73 (1H, br s, OH);  $\delta_c$  (101 MHz,  $CDCl_3$ ) 14.1/14.2 (OCH<sub>2</sub>CH<sub>3</sub>), 28.3/28.3 ((CH<sub>3</sub>)<sub>3</sub>), 57.5/58.8 (C2), 62.5/63.0 (OCH<sub>2</sub>CH<sub>3</sub>), 81.4/82.8 (C(CH<sub>3</sub>)<sub>3</sub>), 155.4/156.6 (C=O), 166.7/166.7 (C=O), 168.4/169.6 (C=O); LRMS (ESI<sup>+</sup>)  $m/z$ : 270.0 ([M + Na]<sup>+</sup> 29%); HRMS (ESI<sup>+</sup>)  $m/z$ : [M + Na]<sup>+</sup> calcd. for C<sub>10</sub>H<sub>17</sub>NO<sub>6</sub>Na, 270.0948, found 270.0948.

#### General procedure for the deprotection of Boc-protected amino esters:

To a solution of Boc-protected amino ester **9a-m** (1 eq.) dissolved in DCM was added TFA (4 eq.) at 0°C under an atmosphere of N<sub>2</sub>. The reaction mixture was then stirred at rt for 2 h, and then concentrated *in-vacuo* to obtain the deprotected amino ester as a trifluoroacetate ammonium salt **28a-k** and was used without further purification.

#### Ethyl (2S\*,3S\*)-2-amino-3-hydroxy-3-phenylpropanoate trifluoroacetic acid **28a**

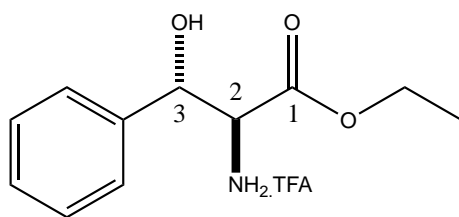

Yield (2.82 g, Quantitative); Thick orange oil;  $\delta_H$  (400 MHz, D<sub>2</sub>O) 1.16 (3H, t,  $J=7.1$  Hz, OCH<sub>2</sub>CH<sub>3</sub>), 4.20 (2H, dq,  $J=2.0$  Hz, 7.2 Hz, OCH<sub>2</sub>CH<sub>3</sub>), 4.48 (1H, d,  $J=4.2$  Hz, H2), 5.40 (1H, d,  $J=4.2$  Hz, H3), 7.39-7.50 (5H, m, Ar-H);  $\delta_c$  (101 MHz, D<sub>2</sub>O) 13.0 (OCH<sub>2</sub>CH<sub>3</sub>), 58.5 (C2), 63.6 (OCH<sub>2</sub>CH<sub>3</sub>), 71.0 (C3), 126.0 (Ar-C), 128.9 (Ar-C), 129.1 (Ar-C), 137.1 (Ar-C), 167.5 (C1); LRMS (ESI<sup>+</sup>)  $m/z$ : 210.2 ([M + H]<sup>+</sup> 6%), 232.2 ([M + Na]<sup>+</sup> 13%); HRMS (ESI<sup>+</sup>)  $m/z$ : [M + H]<sup>+</sup> calcd. for C<sub>11</sub>H<sub>16</sub>NO<sub>3</sub>, 210.1125, found 210.1127.

#### Ethyl (2S\*,3S\*)-2-amino-3-(4-bromophenyl)-3-hydroxypropanoate trifluoroacetic acid **28b**

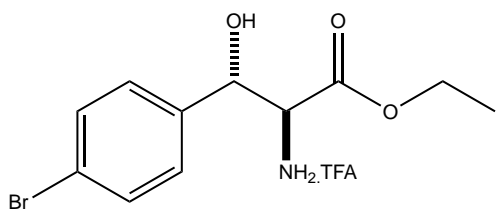

Yield (1.22 g, Quantitative); Pale yellow oil that solidified to a beige solid; m.p. 130-134°C;  $\nu_{max}/cm^{-1}$  3140 (O-H), 2902 (N-H), 1741 (C=O);  $\delta_H$  (400 MHz, D<sub>2</sub>O) 1.13 (3H, t,  $J=7.2$  Hz, OCH<sub>2</sub>CH<sub>3</sub>), 4.18 (2H, dq,  $J=2.5$  Hz, 7.1 Hz, OCH<sub>2</sub>CH<sub>3</sub>), 4.48 (1H, d,  $J=3.9$  Hz, H2), 5.38 (1H, d,  $J=4.0$  Hz, H3), 7.32 (2H, d,  $J=8.4$  Hz, Ar-H), 7.64 (2H, d,  $J=8.5$  Hz, Ar-H);  $\delta_c$  (101 MHz, D<sub>2</sub>O) 13.0 (OCH<sub>2</sub>CH<sub>3</sub>), 58.3 (C2), 63.6 (OCH<sub>2</sub>CH<sub>3</sub>), 70.4 (C3), 122.2 (Ar-C), 127.8 (Ar-C), 131.8 (Ar-C), 136.6 (Ar-C), 167.3 (C1); LRMS (ESI<sup>+</sup>)  $m/z$ : 288.1 ([M<sup>79</sup> + H]<sup>+</sup> 95%), 290.1 ([M<sup>81</sup> + H]<sup>+</sup> 92%); HRMS (ESI<sup>+</sup>)  $m/z$ : [M<sup>79</sup> + H]<sup>+</sup> calcd. for C<sub>11</sub>H<sub>15</sub>NO<sub>3</sub>Br, 288.0230, found 288.0231; [M<sup>81</sup> + H]<sup>+</sup> calcd. for C<sub>11</sub>H<sub>15</sub>NO<sub>3</sub>Br, 290.0209, found 290.0210.

**Ethyl (2S\*,3S\*)-2-amino-3-(4-cyanophenyl)-3-hydroxypropanoate trifluoroacetic acid 28c**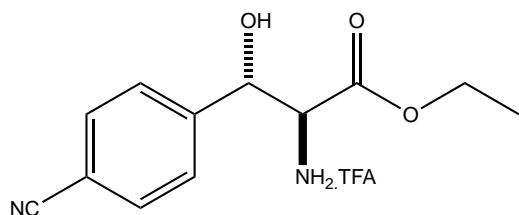

Yield (1.11 g, Quantitative); Light brown oil that solidified to a beige solid; m.p. 150-153°C;  $\nu_{\max}/\text{cm}^{-1}$  3342 (O-H), 2988 (N-H), 2233 (C≡N), 1748 (C=O);  $\delta_{\text{H}}$  (400 MHz, D<sub>2</sub>O) 1.07 (3H, t,  $J=7.2$  Hz, OCH<sub>2</sub>CH<sub>3</sub>), 4.15 (2H, dq,  $J=3.3$  Hz, 7.2 Hz, OCH<sub>2</sub>CH<sub>3</sub>), 4.56 (1H, d,  $J=3.6$  Hz, H<sub>2</sub>), 5.48 (1H, d,  $J=3.6$  Hz, H<sub>3</sub>), 7.59 (2H, d,  $J=8.1$  Hz, Ar-H), 7.85 (2H, d,  $J=8.5$  Hz, Ar-H);  $\delta_{\text{C}}$  (101 MHz, D<sub>2</sub>O) 12.9 (OCH<sub>2</sub>CH<sub>3</sub>), 58.1 (C<sub>2</sub>), 63.5 (OCH<sub>2</sub>CH<sub>3</sub>), 70.5 (C<sub>3</sub>), 111.2 (Ar-C), 119.4 (C≡N), 126.6 (Ar-C), 132.8 (Ar-C), 143.5 (Ar-C), 167.1 (C<sub>1</sub>); LRMS (ESI<sup>+</sup>)  $m/z$ : 235.1 ([M + H]<sup>+</sup> 100%); HRMS (ESI<sup>+</sup>)  $m/z$ : [M + H]<sup>+</sup> calcd. for C<sub>12</sub>H<sub>15</sub>N<sub>2</sub>O<sub>3</sub>, 235.1077, found 235.1078.

**Ethyl (2S\*,3S\*)-2-amino-3-hydroxy-3-(4-(trifluoromethyl)phenyl)propanoate trifluoroacetic acid 28d**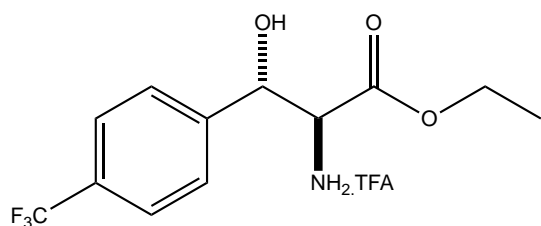

Yield (1.17 g, Quantitative); Yellow oil that solidified to a beige solid; m.p. 124-127°C;  $\nu_{\max}/\text{cm}^{-1}$  3130 (O-H), 2910 (N-H), 1740 (C=O);  $\delta_{\text{H}}$  (400 MHz, D<sub>2</sub>O) 1.10 (3H, t,  $J=7.1$  Hz, OCH<sub>2</sub>CH<sub>3</sub>), 4.17 (2H, dq,  $J=4.0$  Hz, 7.2 Hz, OCH<sub>2</sub>CH<sub>3</sub>), 4.57 (1H, d,  $J=3.7$  Hz, H<sub>2</sub>), 5.51 (1H, d,  $J=3.7$  Hz, H<sub>3</sub>), 7.61 (2H, d,  $J=8.1$  Hz, Ar-H), 7.81 (2H, d,  $J=8.3$  Hz, Ar-H);  $\delta_{\text{C}}$  (101 MHz, D<sub>2</sub>O) 12.9 (OCH<sub>2</sub>CH<sub>3</sub>), 58.3 (C<sub>2</sub>), 63.5 (OCH<sub>2</sub>CH<sub>3</sub>), 70.5 (C<sub>3</sub>), 125.7 (q,  $J=3.6$  Hz, Ar-C), 126.4 (Ar-C), 130.2 (q,  $J=32.2$  Hz, Ar-C), 141.8 (Ar-C), 167.2 (C<sub>1</sub>);  $\delta_{\text{F}}$  (376 MHz, D<sub>2</sub>O) -62.39; LRMS (ESI<sup>+</sup>)  $m/z$ : 278.1 ([M + H]<sup>+</sup> 100%); HRMS (ESI<sup>+</sup>)  $m/z$ : [M + H]<sup>+</sup> calcd. for C<sub>12</sub>H<sub>15</sub>NO<sub>3</sub>F<sub>3</sub>, 278.0999, found 278.0998.

**Ethyl (2S\*,3S\*)-2-amino-3-hydroxy-3-(4-nitrophenyl)propanoate trifluoroacetic acid 28e**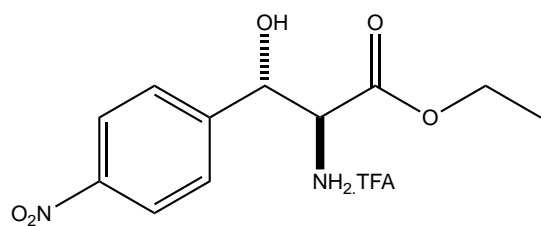

Yield (1.35 g, Quantitative); Yellow oil that solidified to a brown solid; m.p. 142-145°C;  $\nu_{\max}/\text{cm}^{-1}$  3336 (O-H), 2946 (N-H), 1747 (C=O), 1518 (N-O);  $\delta_{\text{H}}$  (400 MHz, D<sub>2</sub>O) 1.06 (3H, t,  $J=7.2$  Hz, OCH<sub>2</sub>CH<sub>3</sub>), 4.15 (2H, m, OCH<sub>2</sub>CH<sub>3</sub>), 4.60 (1H, d,  $J=3.5$  Hz, H<sub>2</sub>), 5.53 (1H, d,  $J=3.5$  Hz, H<sub>3</sub>), 7.66 (2H, d,  $J=9.0$  Hz, Ar-H), 8.31 (2H, d,  $J=8.9$  Hz, Ar-H);  $\delta_{\text{C}}$  (101 MHz, D<sub>2</sub>O) 12.9

(OCH<sub>2</sub>CH<sub>3</sub>), 58.1 (C2), 63.6 (OCH<sub>2</sub>CH<sub>3</sub>), 70.4 (C3), 123.9 (Ar-C), 127.0 (Ar-C), 145.5 (Ar-C), 147.7 (Ar-C), 167.0 (C1); LRMS (ESI<sup>+</sup>) *m/z*: 255.1 ([M + H]<sup>+</sup> 100%); HRMS (ESI<sup>+</sup>) *m/z*: [M + H]<sup>+</sup> calcd. for C<sub>11</sub>H<sub>15</sub>N<sub>2</sub>O<sub>5</sub>, 255.0975, found 255.0975.

**Ethyl (2*S*\*,3*S*\*)-2-amino-3-hydroxy-3-(3-methoxyphenyl)propanoate trifluoroacetic acid 28f**

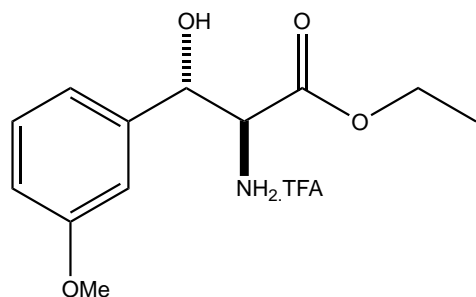

Yield (1.19 g, Quantitative); Yellow oil;  $\nu_{\max}/\text{cm}^{-1}$  3424 (O-H), 2943 (N-H), 1738 (C=O);  $\delta_{\text{H}}$  (400 MHz, D<sub>2</sub>O) 1.16 (3H, t, *J*=7.2 Hz, OCH<sub>2</sub>CH<sub>3</sub>), 3.86 (3H, s, OCH<sub>3</sub>), 4.21 (2H, m, OCH<sub>2</sub>CH<sub>3</sub>), 4.49 (1H, d, *J*=4.1 Hz, H2), 5.40 (1H, d, *J*=4.0 Hz, H3), 7.00-7.06 (3H, m, Ar-H), 7.43 (1H, t, *J*=7.9 Hz, Ar-H);  $\delta_{\text{C}}$  (101 MHz, D<sub>2</sub>O) 13.0 (OCH<sub>2</sub>CH<sub>3</sub>), 55.4 (OCH<sub>3</sub>), 58.4 (C2),

63.5 (OCH<sub>2</sub>CH<sub>3</sub>), 70.7 (C3), 111.7 (Ar-C), 114.3 (Ar-C), 118.6 (Ar-C), 130.3 (Ar-C), 139.0 (Ar-C), 159.2 (Ar-C), 167.4 (C1); LRMS (ESI<sup>+</sup>) *m/z*: 262.0 ([M + Na]<sup>+</sup> 21%); HRMS (ESI<sup>+</sup>) *m/z*: [M + H]<sup>+</sup> calcd. for C<sub>12</sub>H<sub>18</sub>NO<sub>4</sub>, 240.1230, found 240.1232.

**Ethyl (2*S*\*,3*S*\*)-2-amino-3-(3-chlorophenyl)-3-hydroxypropanoate trifluoroacetic acid 28g**

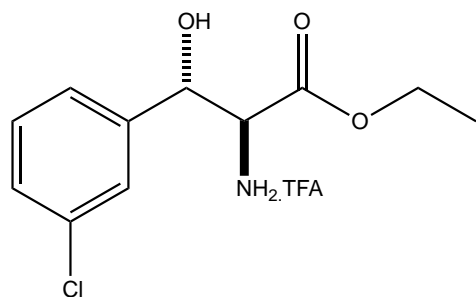

Yield (1.19 g, Quantitative); Yellow oil that solidified to an off-white solid; m.p. 80-83°C;  $\nu_{\max}/\text{cm}^{-1}$  3450 (O-H), 2989 (N-H), 1741 (C=O);  $\delta_{\text{H}}$  (400 MHz, D<sub>2</sub>O) 1.13 (3H, t, *J*=7.2 Hz, OCH<sub>2</sub>CH<sub>3</sub>), 4.18 (2H, m, OCH<sub>2</sub>CH<sub>3</sub>), 4.49 (1H, d, *J*=3.9 Hz, H2), 5.39 (1H, d, *J*=3.9 Hz, H3), 7.30-7.45 (4H, m, Ar-H);  $\delta_{\text{C}}$  (101 MHz, D<sub>2</sub>O) 13.0 (OCH<sub>2</sub>CH<sub>3</sub>), 58.3 (d, *J*=4.8

Hz, C2), 63.6 (OCH<sub>2</sub>CH<sub>3</sub>), 70.3 (d, *J*=5.6 Hz, C3), 124.3 (Ar-C), 125.9 (Ar-C), 128.8 (Ar-C), 130.3 (Ar-C), 134.1 (Ar-C), 139.6 (Ar-C), 167.2 (C1); LRMS (ESI<sup>+</sup>) *m/z*: 244.1 ([M<sup>35</sup> + H]<sup>+</sup> 75%), 246.1 ([M<sup>37</sup> + H]<sup>+</sup> 67%); HRMS (ESI<sup>+</sup>) *m/z*: [M<sup>35</sup> + H]<sup>+</sup> calcd. for C<sub>11</sub>H<sub>15</sub>NO<sub>3</sub>Cl, 244.0735, found 244.0736; [M<sup>37</sup> + H]<sup>+</sup> calcd. for C<sub>11</sub>H<sub>15</sub>NO<sub>3</sub>Cl, 246.0705, found 246.0707.

**Ethyl (2*S*\*,3*S*\*)-2-amino-3-(3-bromophenyl)-3-hydroxypropanoate trifluoroacetic acid 28h**

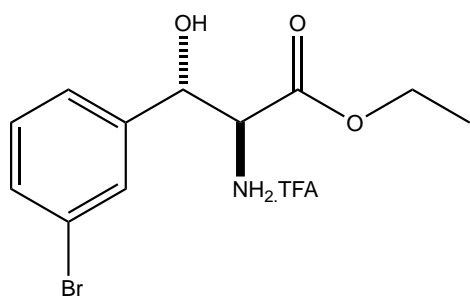

Yield (1.19 g, Quantitative); Off-white semi-solid;  $\nu_{\max}/\text{cm}^{-1}$  3163 (O-H), 2871 (N-H), 1749 (C=O);  $\delta_{\text{H}}$  (400 MHz,  $\text{D}_2\text{O}$ ) 1.14 (3H, t,  $J=7.2$  Hz,  $\text{OCH}_2\text{CH}_3$ ), 4.19 (2H, m,  $\text{OCH}_2\text{CH}_3$ ), 4.49 (1H, d,  $J=3.8$  Hz, H2), 5.40 (1H, d,  $J=3.8$  Hz, H3), 7.34-7.41 (2H, m, Ar-H), 7.56-7.63 (2H, m, Ar-H);  $\delta_{\text{C}}$  (101 MHz,  $\text{D}_2\text{O}$ ) 13.0 ( $\text{OCH}_2\text{CH}_3$ ), 58.3 (C2), 63.6 ( $\text{OCH}_2\text{CH}_3$ ), 70.3 (C3), 122.2 (Ar-C), 124.8 (Ar-C), 128.9 (Ar-C), 130.6 (Ar-C), 131.8 (Ar-C), 139.9 (Ar-C), 167.2 (C1); LRMS ( $\text{ESI}^+$ )  $m/z$ : 288.0 ( $[\text{M}^{79} + \text{H}]^+$  100%), 290.1 ( $[\text{M}^{81} + \text{H}]^+$  100%); HRMS ( $\text{ESI}^+$ )  $m/z$ :  $[\text{M}^{79} + \text{H}]^+$  calcd. for  $\text{C}_{11}\text{H}_{15}\text{NO}_3\text{Br}$ , 288.0230, found 288.0230;  $[\text{M}^{81} + \text{H}]^+$  calcd. for  $\text{C}_{11}\text{H}_{15}\text{NO}_3\text{Br}$ , 290.0209, found 290.0209.

#### Ethyl (2S\*,3S\*)-2-amino-3-(2-fluorophenyl)-3-hydroxypropanoate trifluoroacetic acid 28i

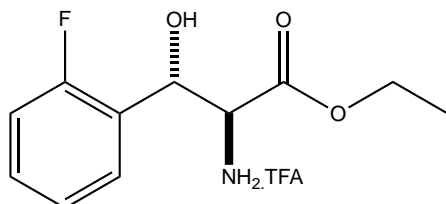

Yield (1.12 g, Quantitative); Yellow oil that solidified to a light orange solid; m.p. 127-130°C;  $\nu_{\max}/\text{cm}^{-1}$  3558 (O-H), 2907 (N-H), 1733 (C=O);  $\delta_{\text{H}}$  (400 MHz,  $\text{D}_2\text{O}$ ) 1.10 (3H, t,  $J=7.2$  Hz,  $\text{OCH}_2\text{CH}_3$ ), 4.16 (2H, dq,  $J=0.8$  Hz, 7.2 Hz,  $\text{OCH}_2\text{CH}_3$ ), 4.54 (1H, d,  $J=3.7$  Hz, H2), 5.59 (1H, d,  $J=3.7$  Hz, H3), 7.21 (1H, m, Ar-H), 7.32 (1H, dt,  $J=1.2$  Hz, 7.6 Hz, Ar-H), 7.48 (1H, m, Ar-H), 7.54 (1H, m, Ar-H);  $\delta_{\text{C}}$  (101 MHz,  $\text{D}_2\text{O}$ ) 12.9 ( $\text{OCH}_2\text{CH}_3$ ), 57.0 (d,  $J=2.1$  Hz, C2), 63.5 ( $\text{OCH}_2\text{CH}_3$ ), 66.3 (d,  $J=2.0$  Hz, C3), 115.4 (d,  $J=21.1$  Hz, Ar-C), 124.7 (d,  $J=8.0$  Hz, Ar-C), 124.7 (d,  $J=8.8$  Hz, Ar-C), 127.6 (d,  $J=3.9$  Hz, Ar-C), 130.8 (d,  $J=8.6$  Hz, Ar-C), 159.4 (d,  $J=244.2$  Hz, Ar-C), 167.4 (C1);  $\delta_{\text{F}}$  (376 MHz,  $\text{D}_2\text{O}$ ) -118.29; LRMS ( $\text{ESI}^+$ )  $m/z$ : 228.1 ( $[\text{M} + \text{H}]^+$  100%), 250.1 ( $[\text{M} + \text{Na}]^+$  59%); HRMS ( $\text{ESI}^+$ )  $m/z$ :  $[\text{M} + \text{H}]^+$  calcd. for  $\text{C}_{11}\text{H}_{15}\text{NO}_3\text{F}$ , 228.1030, found 228.1030.

#### Ethyl (2S\*,3S\*)-2-amino-3-(2-bromophenyl)-3-hydroxypropanoate trifluoroacetic acid 28j

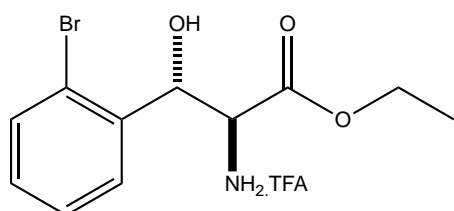

Yield (1.61 g, Quantitative); Yellow oil that solidified to an off-white solid; m.p. 65-70°C;  $\nu_{\max}/\text{cm}^{-1}$  3502 (O-H), 2982 (N-H), 1732 (C=O);  $\delta_{\text{H}}$  (400 MHz,  $\text{D}_2\text{O}$ ) 1.02 (3H, t,  $J=7.2$  Hz,  $\text{OCH}_2\text{CH}_3$ ), 4.09 (2H, q,  $J=7.2$  Hz,  $\text{OCH}_2\text{CH}_3$ ), 4.62 (1H, d,  $J=3.2$  Hz, H2), 5.51 (1H, d,  $J=3.2$  Hz, H3), 7.33 (1H, dt,  $J=1.9$  Hz, 7.7 Hz, Ar-H), 7.48 (1H, dt,  $J=1.3$  Hz, 7.6 Hz, Ar-H), 7.55 (1H, dd,  $J=1.8$  Hz, 7.9 Hz, Ar-H), 7.68 (1H, dd,  $J=1.2$  Hz, 8.0 Hz, Ar-H);  $\delta_{\text{C}}$  (101 MHz,  $\text{D}_2\text{O}$ ) 12.9 ( $\text{OCH}_2\text{CH}_3$ ), 55.9 (C2), 63.4 ( $\text{OCH}_2\text{CH}_3$ ), 70.7 (C3), 120.8

(Ar-C), 127.9 (Ar-C), 128.1 (Ar-C), 130.4 (Ar-C), 132.8 (Ar-C), 137.0 (Ar-C), 167.3 (C1); LRMS (ESI<sup>+</sup>) *m/z*: 288.0 ([M<sup>79</sup> + H]<sup>+</sup> 63%), 290.0 ([M<sup>81</sup> + H]<sup>+</sup> 63%); HRMS (ESI<sup>+</sup>) *m/z*: [M<sup>79</sup> + H]<sup>+</sup> calcd. for C<sub>11</sub>H<sub>15</sub>NO<sub>3</sub>Br, 288.0230, found 288.0229; [M<sup>81</sup> + H]<sup>+</sup> calcd. for C<sub>11</sub>H<sub>15</sub>NO<sub>3</sub>Br, 290.0209, found 290.0208.

### Ethyl (2*S*\*,3*S*\*)-2-amino-3-hydroxy-3-(pyridin-3-yl)propanoate trifluoroacetic acid 28k

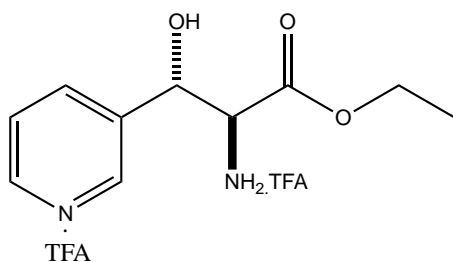

Yield (3.30 g, Quantitative); Yellow semi-solid;  $\nu_{\max}/\text{cm}^{-1}$  3076 (O-H), 2988 (N-H), 1742 (C=O);  $\delta_{\text{H}}$  (400 MHz, D<sub>2</sub>O) 1.02 (3H, t, *J*=7.1 Hz, OCH<sub>2</sub>CH<sub>3</sub>), 4.14 (2H, m, OCH<sub>2</sub>CH<sub>3</sub>), 4.69 (1H, d, *J*=2.7 Hz, H2), 5.64 (1H, d, *J*=2.7 Hz, H3), 8.16 (1H, m, Ar-H), 8.68 (1H, m, Ar-H), 8.82 (1H, m, Ar-H), 8.91 (1H, m, Ar-H);  $\delta_{\text{C}}$  (101 MHz, D<sub>2</sub>O) 12.9 (OCH<sub>2</sub>CH<sub>3</sub>), 57.5 (C2),

63.7 (OCH<sub>2</sub>CH<sub>3</sub>), 68.2 (C3), 127.2 (Ar-C), 139.0 (Ar-C), 140.1 (Ar-C), 140.9 (Ar-C), 144.5 (Ar-C), 166.4 (C1); LRMS (ESI<sup>+</sup>) *m/z*: 211.1 ([M + H]<sup>+</sup> 100%); HRMS (ESI<sup>+</sup>) *m/z*: [M + H]<sup>+</sup> calcd. for C<sub>10</sub>H<sub>15</sub>N<sub>2</sub>O<sub>3</sub>, 211.1077, found 211.1079.

### References

- 1) Z. Lu, Y. Zhang and W.D. Wulff, *J. Am. Chem. Soc.*, 2007, **129**, 7185-7194.
- 2) J. Cosier and A.M. Glazer, *J. Appl. Crystallogr.*, 1986, **19**, 105-107.
- 3) L. Palatinus and G. Chapuis, *J. Appl. Crystallogr.*, 2007, **40**, 786-790.
- 4) P. W. Betteridge, J.R. Carruthers, R.I. Cooper, K. Prout and D.J. Watkins, *J. Appl. Crystallogr.*, 2003, **36**, 1487-1487.
- 5) R.J. Clay, T.A. Collom, G.L. Karrick and J. Wemple, *Synthesis* 1993, **3**, 290-292.
- 6) S.C.M. Fell, M.J. Pearson, G. Burton and J.S. Elder, *J. Chem. Soc., Perkin Trans. 1*, 1995, 1483-1493.
- 7) I. R. Corrêa Jr and P.J.S. Moran, *Tetrahedron*, 1995, **55**, 14221-14232.
- 8) Y-T. Chang and W.H. Hartung, *J. Am. Chem. Soc.*, 1953, **75**, 89-91.
- 9) H. Inoue, K. Matsuki and T. Oh-ishi, *Chem. Pharm. Bull.*, 1993, **41**, 1521-1523.
- 10) W.H. Hartung, T.T. Dittrich and Y-T. Chang, *J. Am. Chem. Soc.*, 1953, **75**, 238-239.
- 11) S.G. Davies, A.M. Fletcher, A.B. Frost, J.A. Lee, P.M. Roberts and J.E. Thomson, *Tetrahedron*, 2013, **69**, 8885-8898.
- 12) P. Chaumont, J. Baudoux, J. Maddaluno, J. Rouden and A. Harrison-Marchand, *J. Org. Chem.* 2018, **83**, 8081-8091.
- 13) X. Wang, L. Xu, F. Xiong, Y. Wu and F. Chen, *RSC Adv.*, 2016, **6**, 37701-37709.
- 14) M.D. Andrews, A.G. Brewster, K.M. Crapnell, A.J. Ibbett, T. Jones, M.G. Moloney, K. Prout and D. Watkin, *J. Chem. Soc. Perkin Trans. 1*, 1998, 223-235.
- 15) H. Bagum, K.E. Christensen, M. Genov, A. Pretsch, D. Pretsch and M.G. Moloney, *J. Org. Chem.*, 2019, **84**, 10257-10279.
- 16) H. Bagum, K. E. Christensen, M. Genov, A. Pretsch, D. Pretsch and M.G. Moloney, *Tetrahedron* 2019, **75**, 130561.
- 17) E.A. Heavyside, DPhil Thesis, 2012, University of Oxford.
- 18) E.J. Corey, *J. Am. Chem. Soc.*, 1952, **74**, 5897-5905.

- 19) L. Josa-Culleré, C. Towers, A.L. Thompson and M.G. Moloney, *Eur. J. Org. Chem.* 2017, 7055-7059.
- 20) Y-C. Jeong, M. Anwar, Z. Bikadi, E. Hazai and M.G. Moloney, *Chem. Sci.*, 2013, **4**, 1008-1015.
- 21) T.D. Panduwawala, S. Iqbal, A.L. Thompson, M. Genov, A. Pretsch, D. Pretsch, S. Liu, R.H. Ebright, A. Howells, A. Maxwell and M.G. Moloney, *Org. Biomol. Chem.*, 2019, **17**, 5615-5632.
- 22) Y-C. Jeong and M.G. Moloney, *J. Org. Chem.* 2011, **76**, 1342-1354.
- 23) Y-C. Jeong, Z. Bikadi, E. Hazai and M.G. Moloney, *ChemMedChem* 2014, **9**, 1826-1837.
- 24) S.S. Schilson, P. Keul, R.S. Shaikh, M. Schäfers, B. Levkau and G. Haufe, *Bioorg. Med. Chem.*, 2015, **23**, 1011-1026.
- 25) U. Schmidt, H. Griesser, A. Lieberknecht, J. Schmidt and T. Gräther, *Synthesis*, 1993, **8**, 765-766.

Aug17-2019-60-LS486(C).1.fid  
Instrument AVF400  
Chemist Liban Saney  
Group MGM  
Project Account Code DM7300  
h1acq.crl CDCl3 {C:\NMR} mgmgrp 60

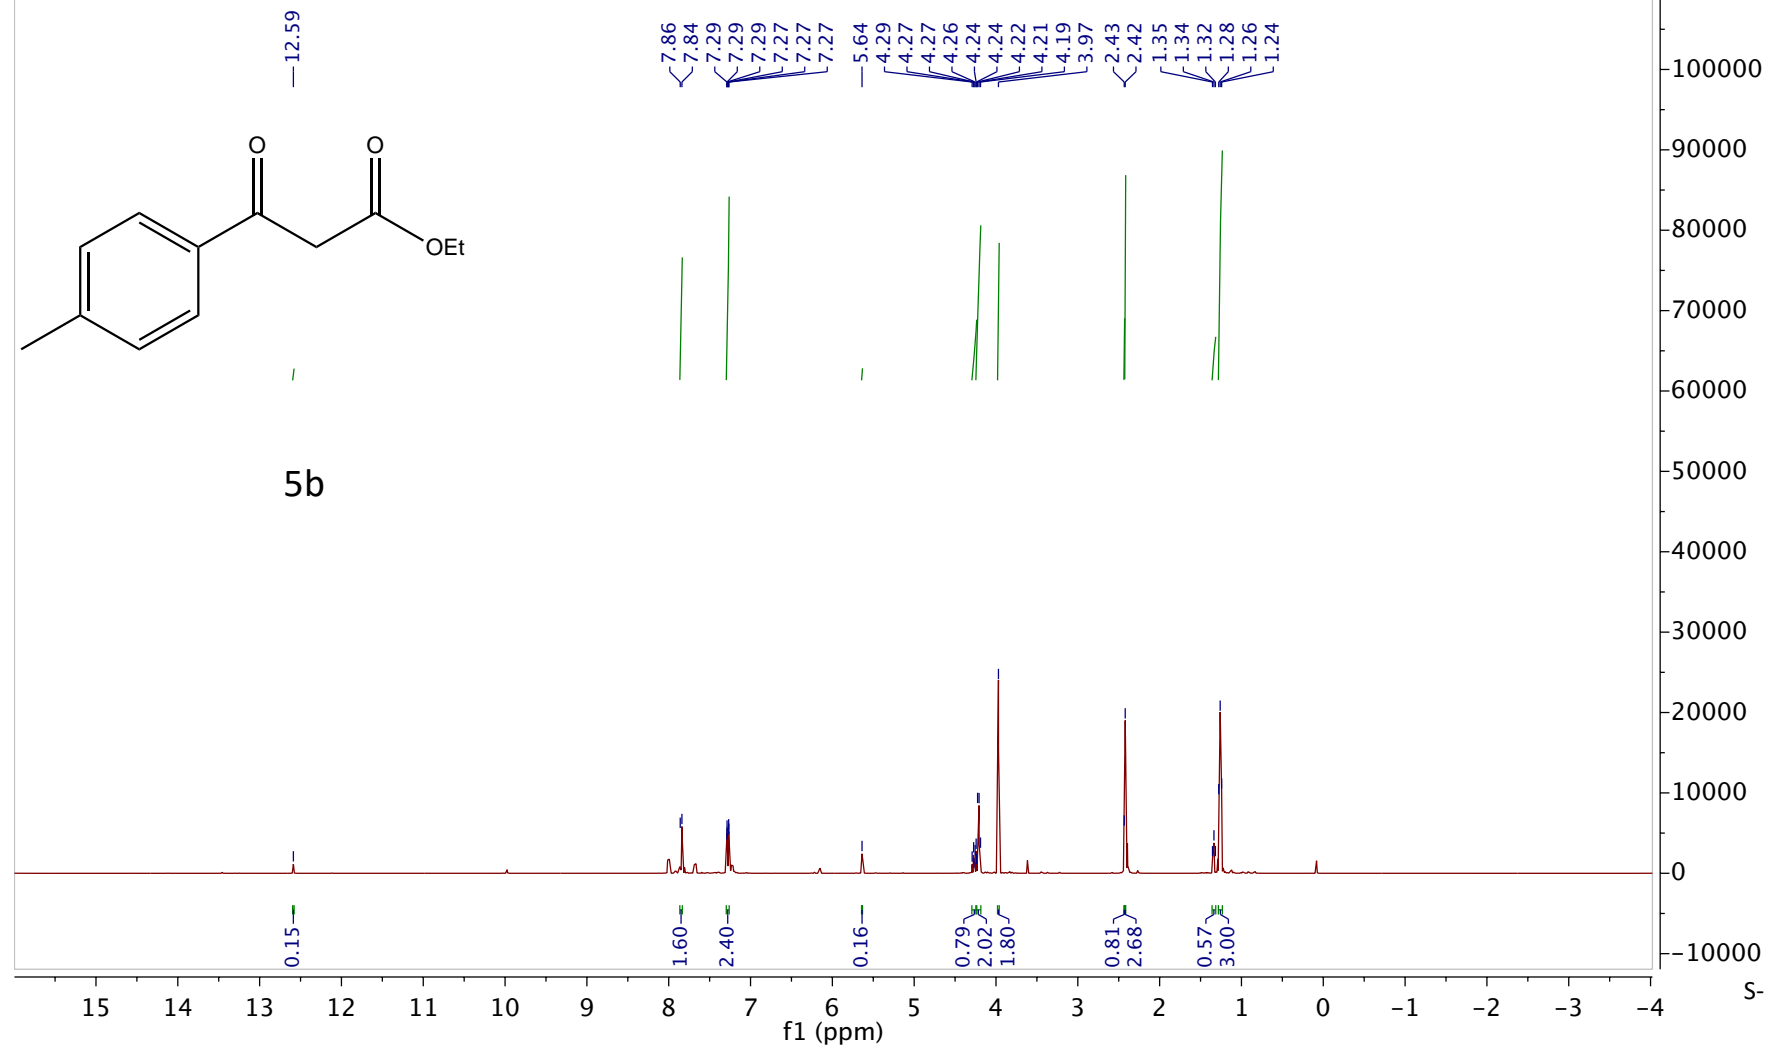

Aug17-2019-60-LS486(C).4.fid  
Instrument AVF400  
Chemist Liban Saney  
Group MGM  
Project Account Code DM7300  
c13acq\_512.crl CDCl3 {C:\NMR} mgmgrp 60

<sup>13</sup>C NMR (101 MHz, CDCl<sub>3</sub>)

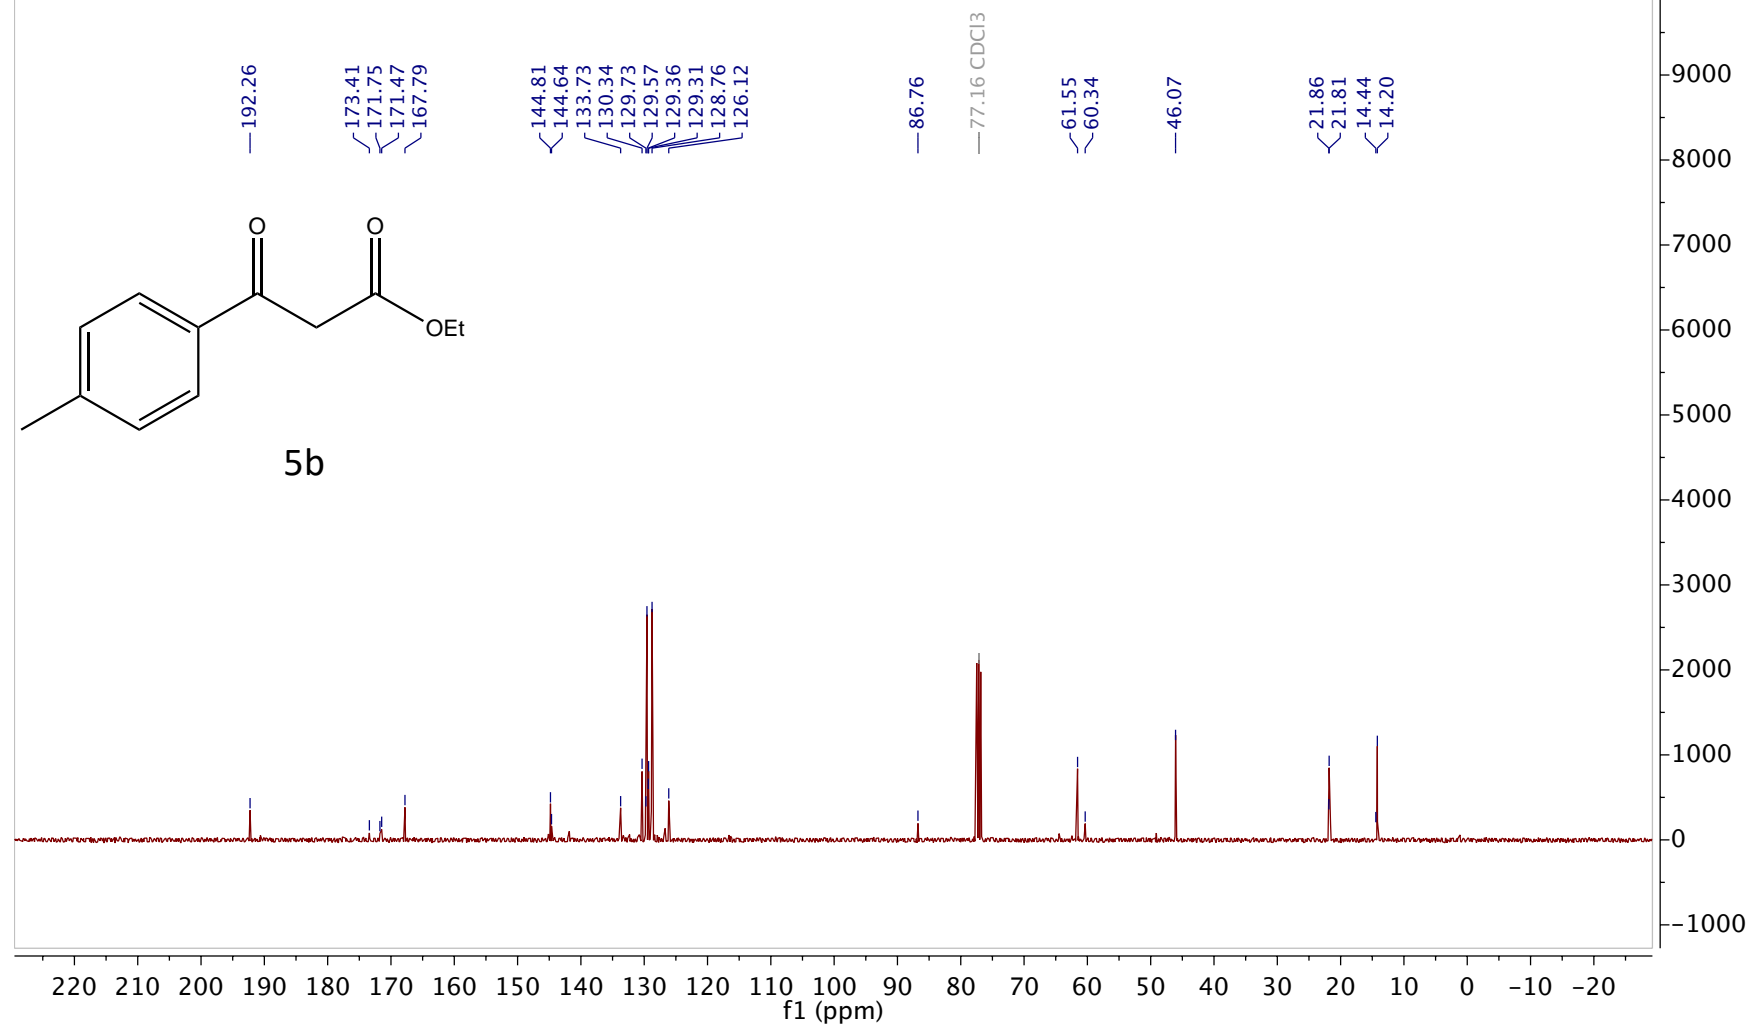



Aug26-2019-60-LS504(C).1.fid  
Instrument AVF400  
Chemist Liban Saney  
Group MGM  
Project Account Code DM7300  
h1acq.crl CDCl3 {C:\NMR} mgmgrp 60

$^1\text{H NMR}$  (400 MHz,  $\text{CDCl}_3$ )

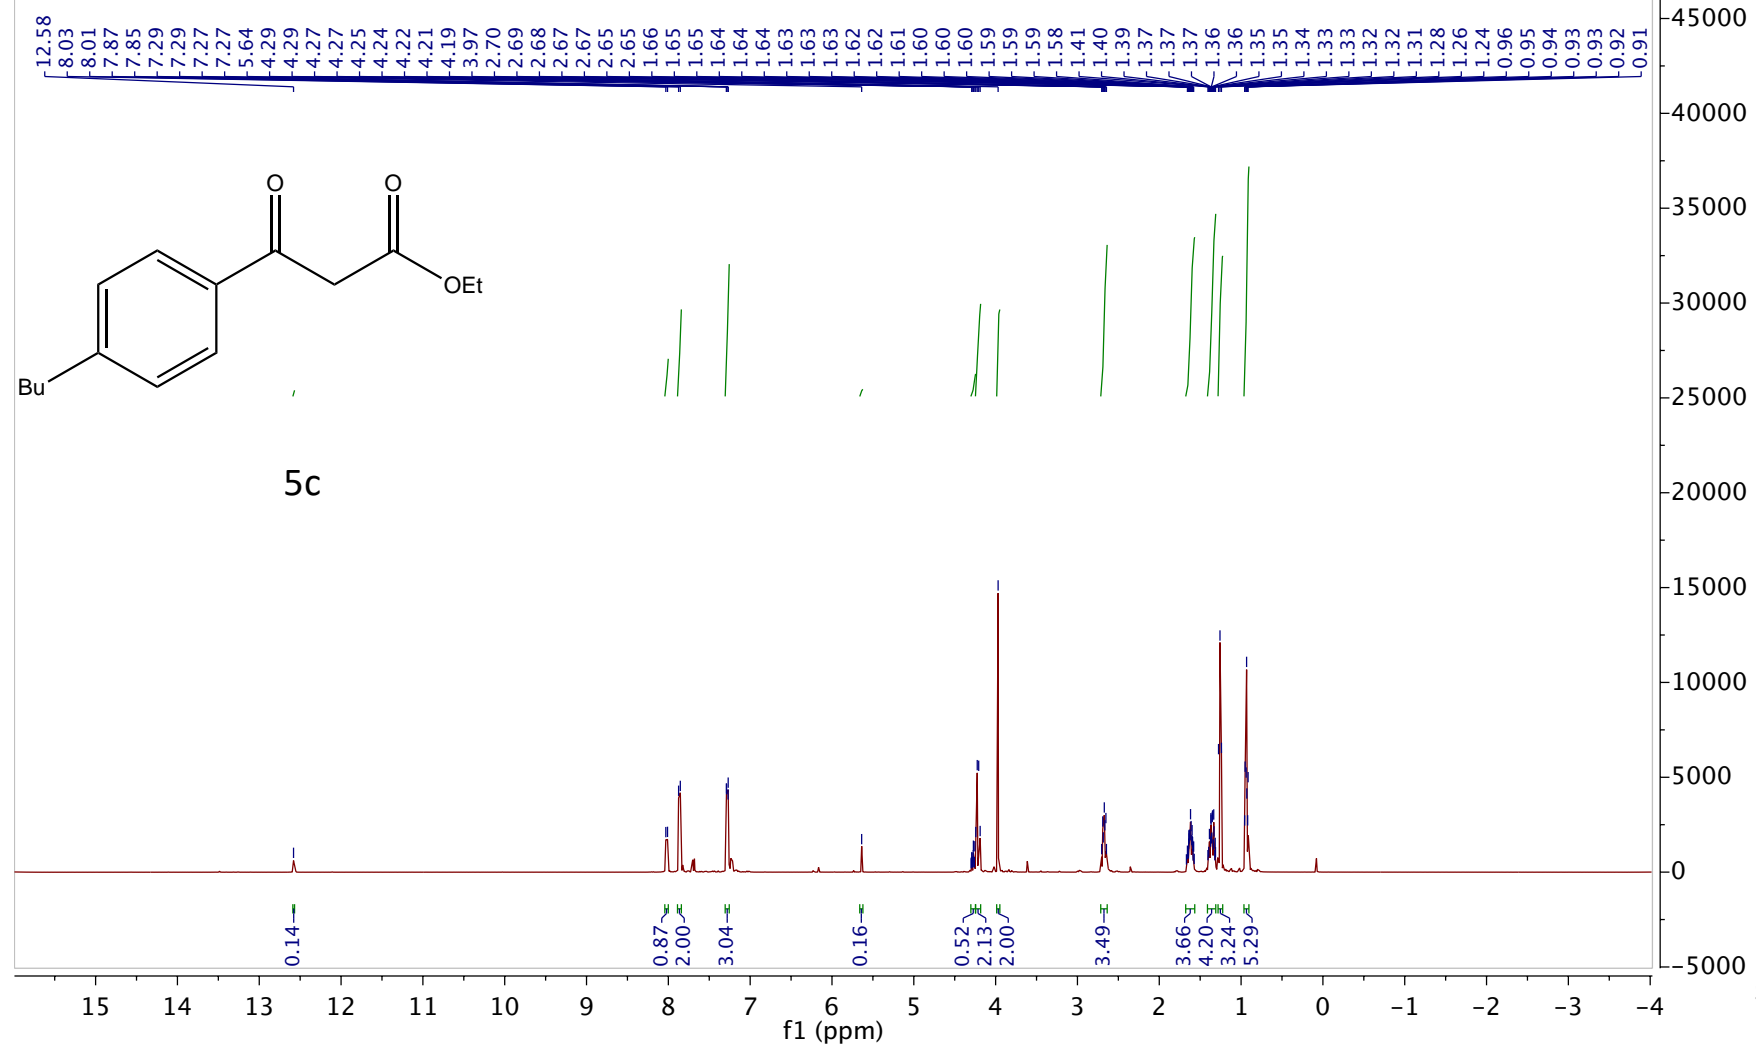

Aug26-2019-60-LS504(C).4.fid  
Instrument AVF400  
Chemist Liban Saney  
Group MGM  
Project Account Code DM7300  
c13acq\_512.crl CDCl3 {C:\NMR} mgmgrp 60

<sup>13</sup>C NMR (101 MHz, CDCl<sub>3</sub>)

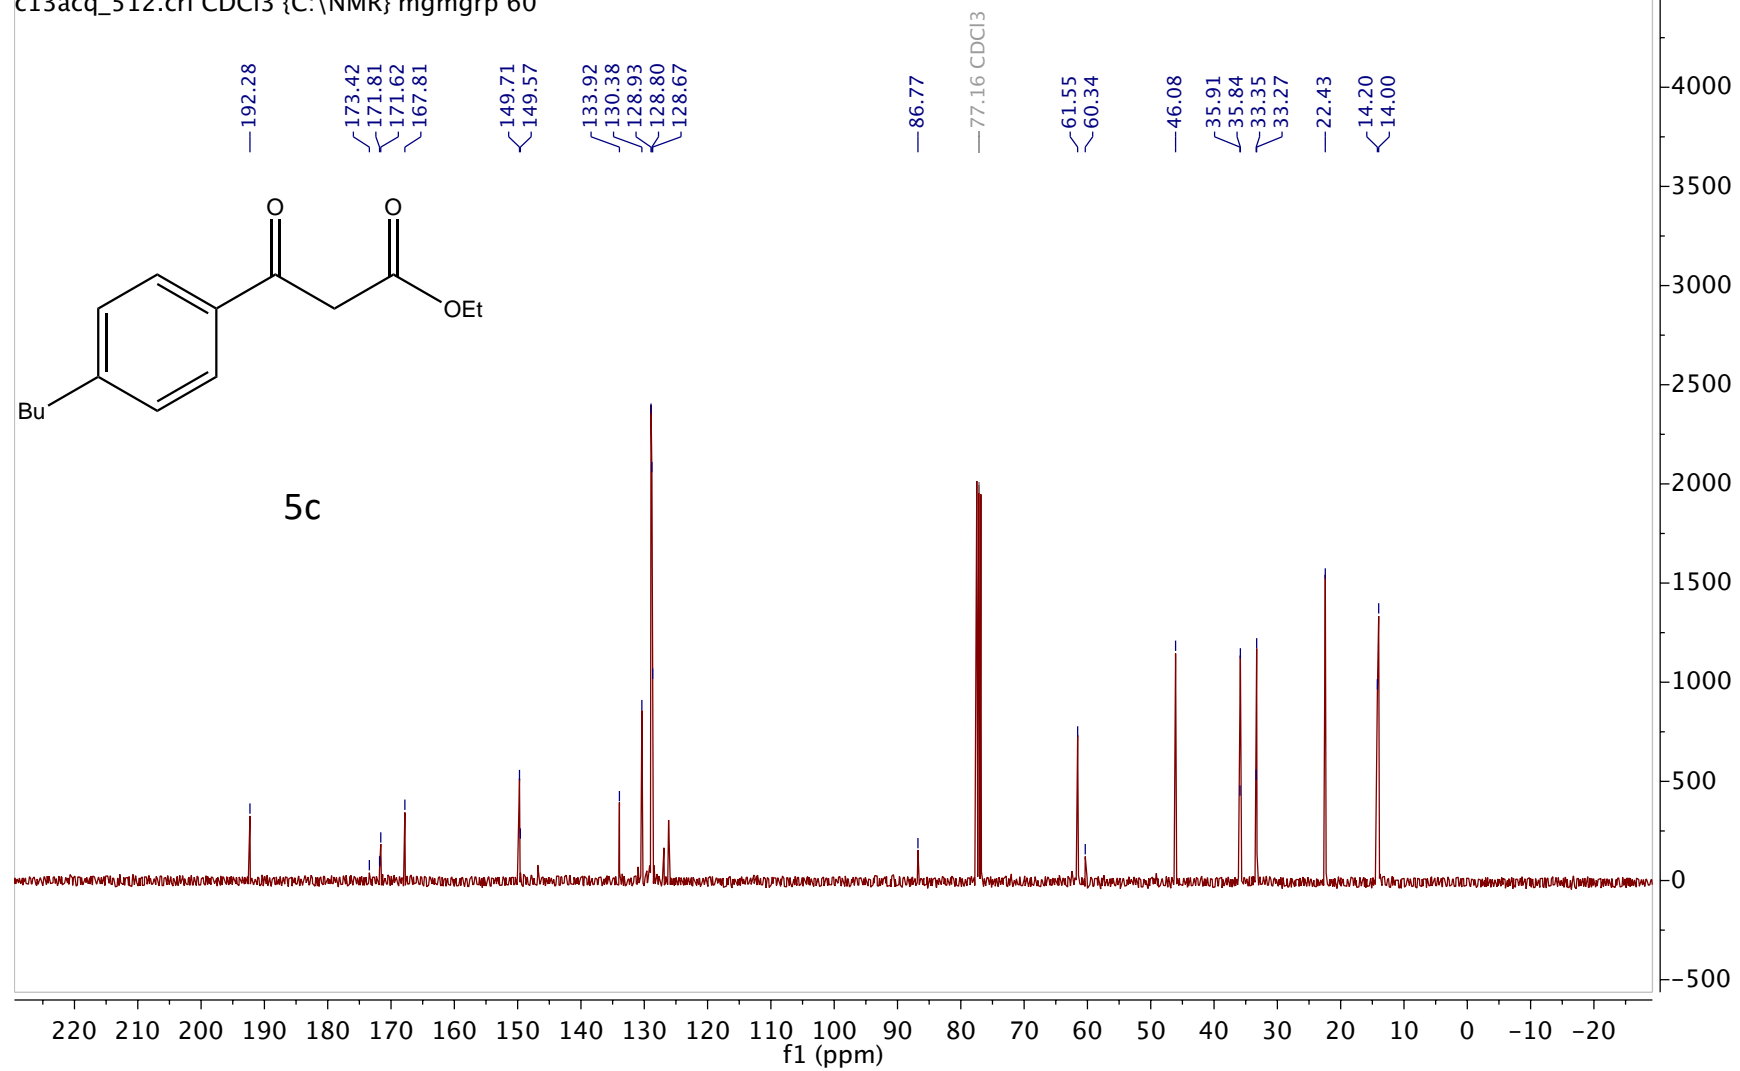

Aug22-2019-52-LS498(C).1.fid  
Instrument AVF400  
Chemist Liban Saney  
Group MGM  
Project Account Code DM7300  
h1acq.crl CDCl3 {C:\NMR} mgmgrp 52

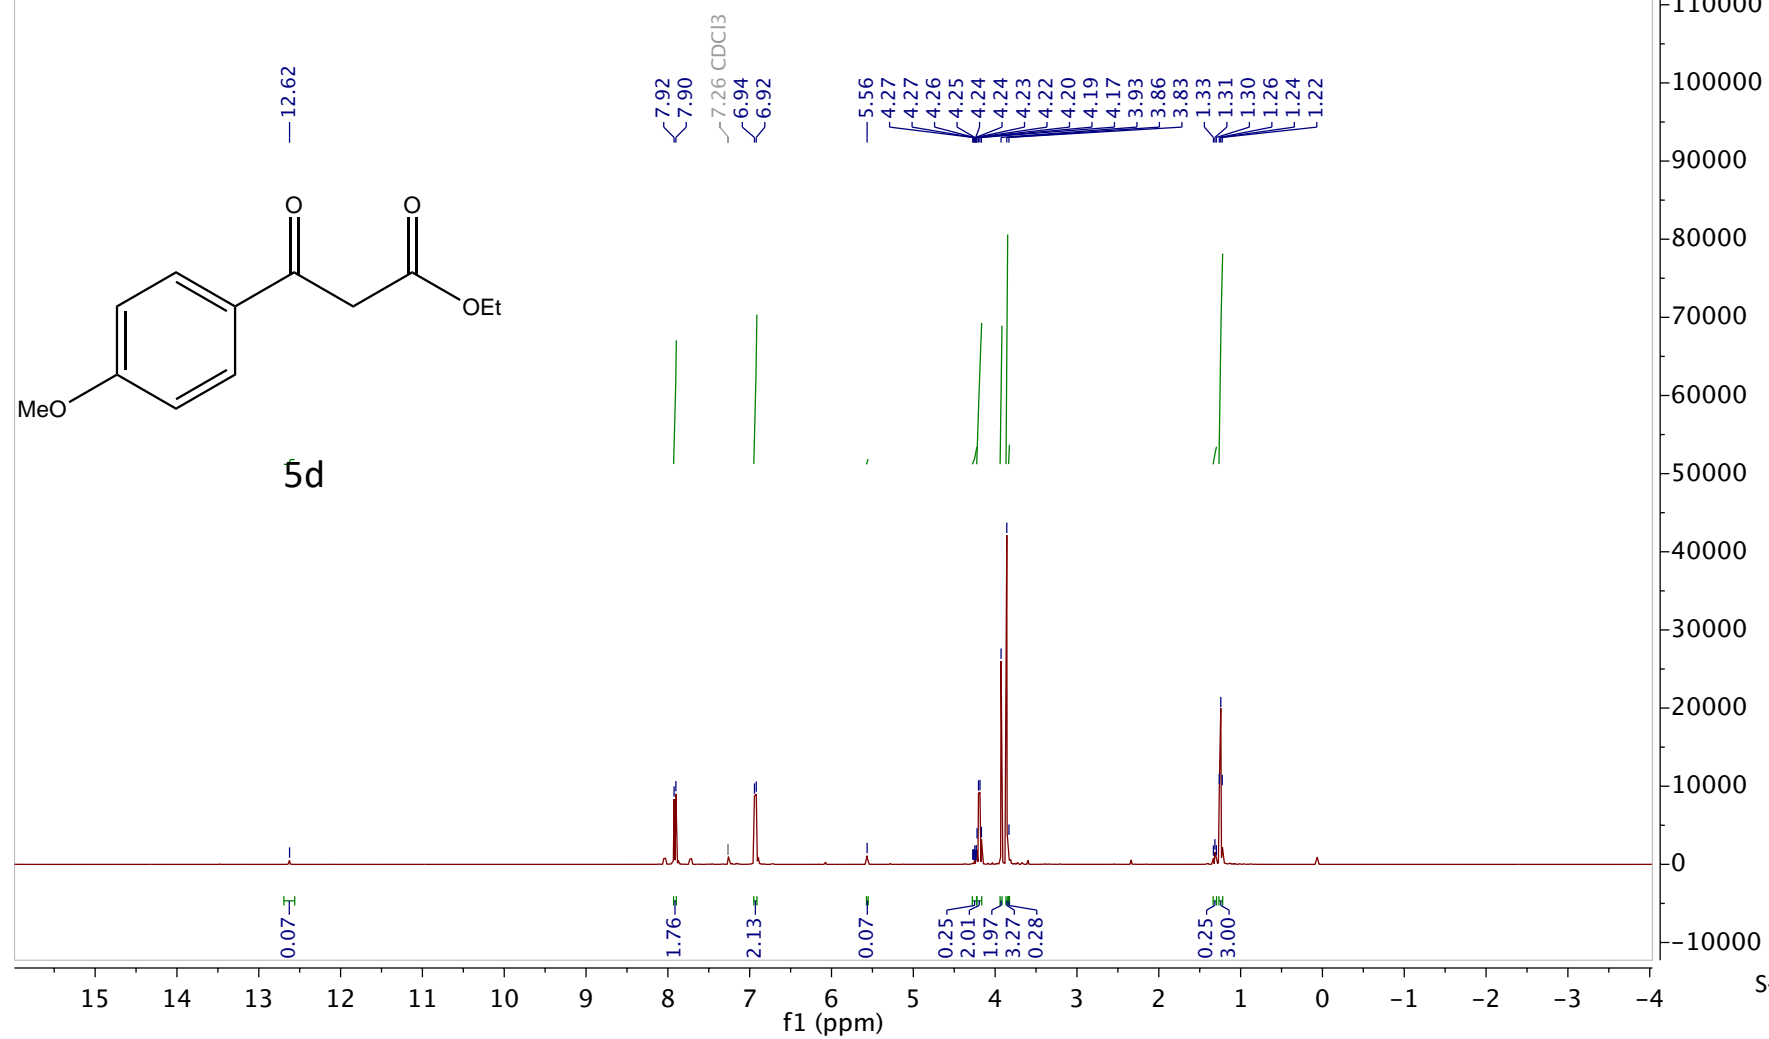

Aug22-2019-52-LS498(C).4.fid  
Instrument AVF400  
Chemist Liban Saney  
Group MGM  
Project Account Code DM7300  
c13acq\_512.crl CDCl3 {C:\NMR} mgmgrp 52

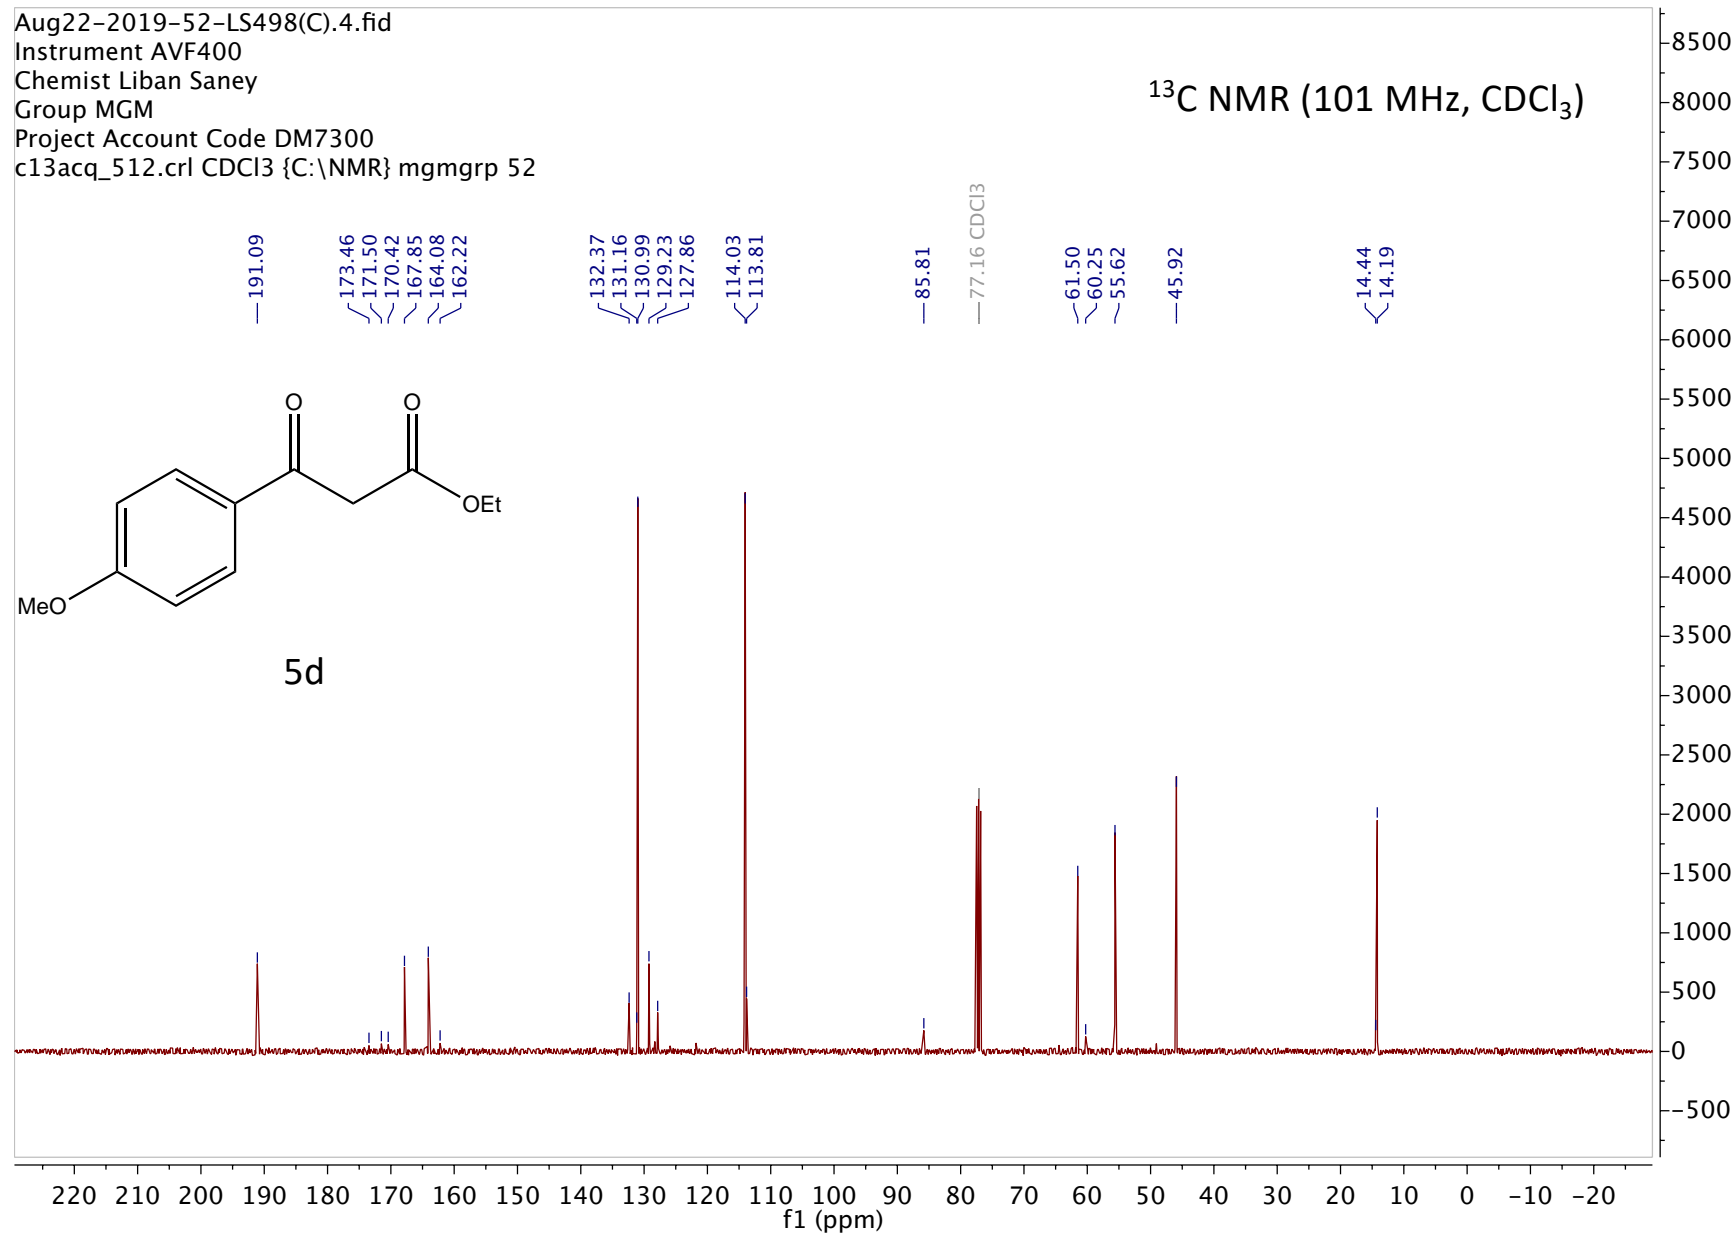

Sep08-2019-60-LS526(C).1.fid  
Instrument AVF400  
Chemist Liban Saney  
Group MGM  
Project Account Code DM7300  
h1acq.crl CDCl3 {C:\NMR} mgmgrp 60

<sup>1</sup>H NMR (400 MHz, CDCl<sub>3</sub>)

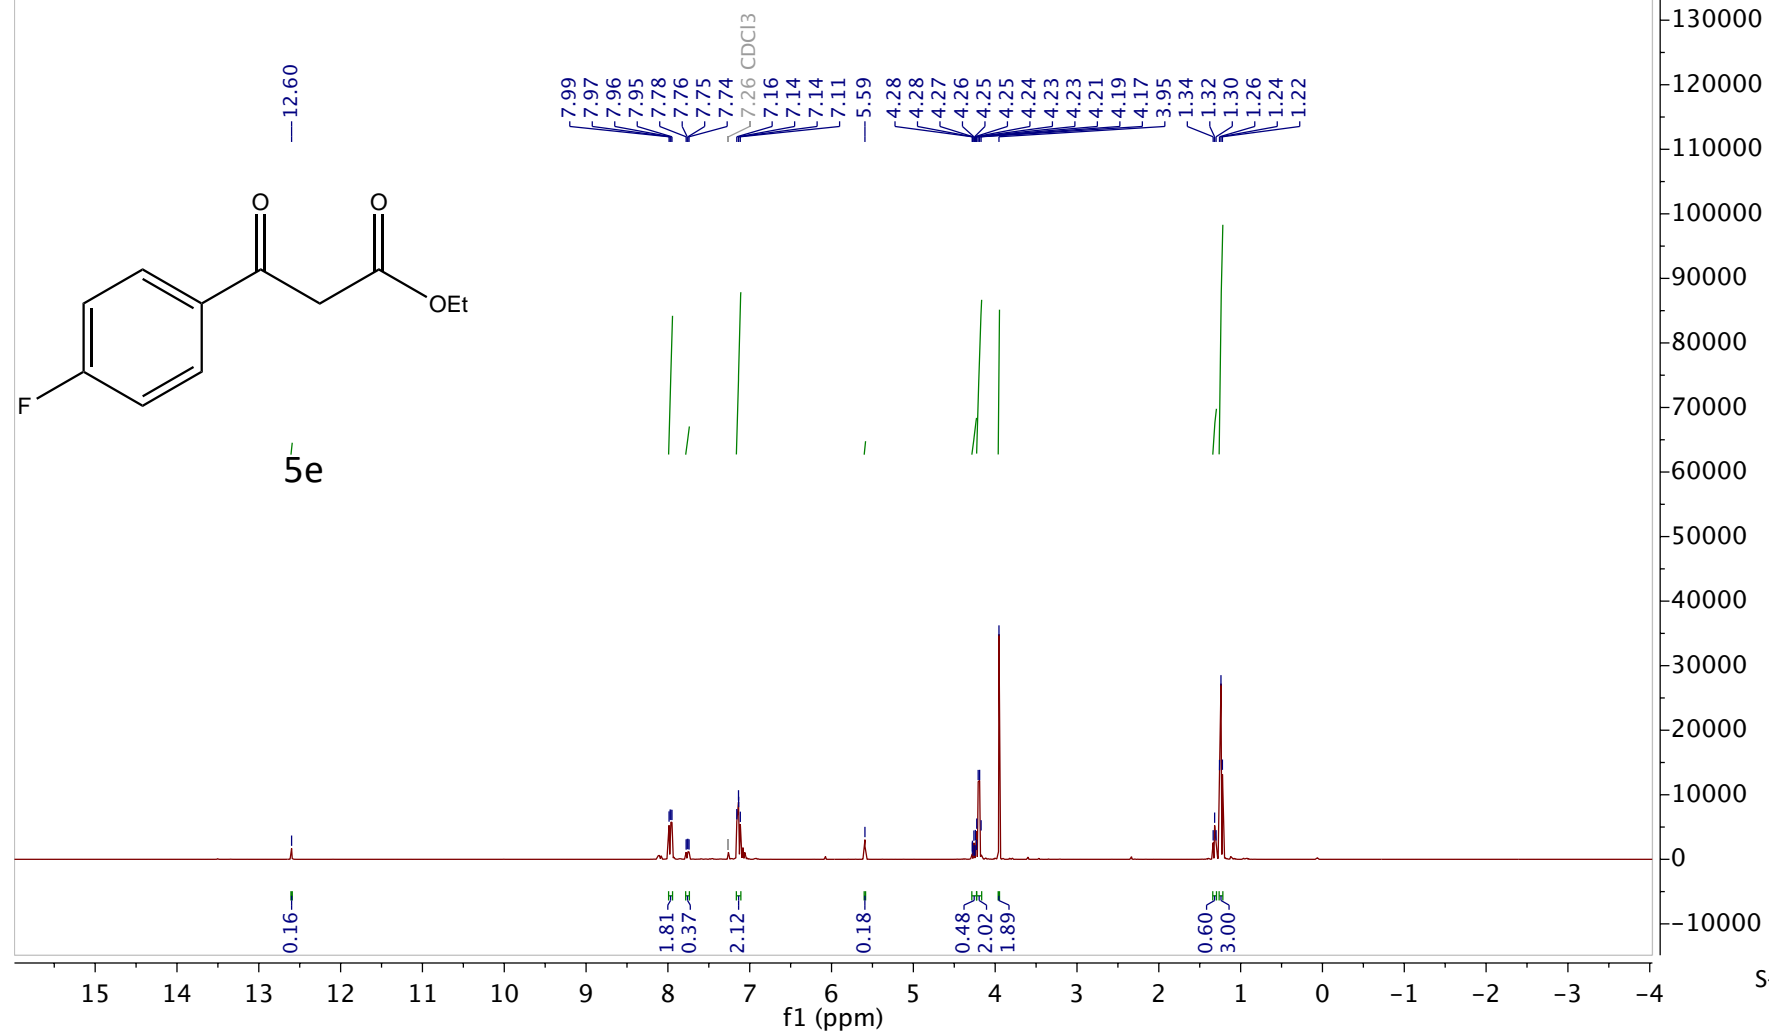

Sep08-2019-60-LS526(C).4.fid  
Instrument AVF400  
Chemist Liban Saney  
Group MGM  
Project Account Code DM7300  
c13acq\_512.crl CDCl3 {C:\NMR} mgmgrp 60

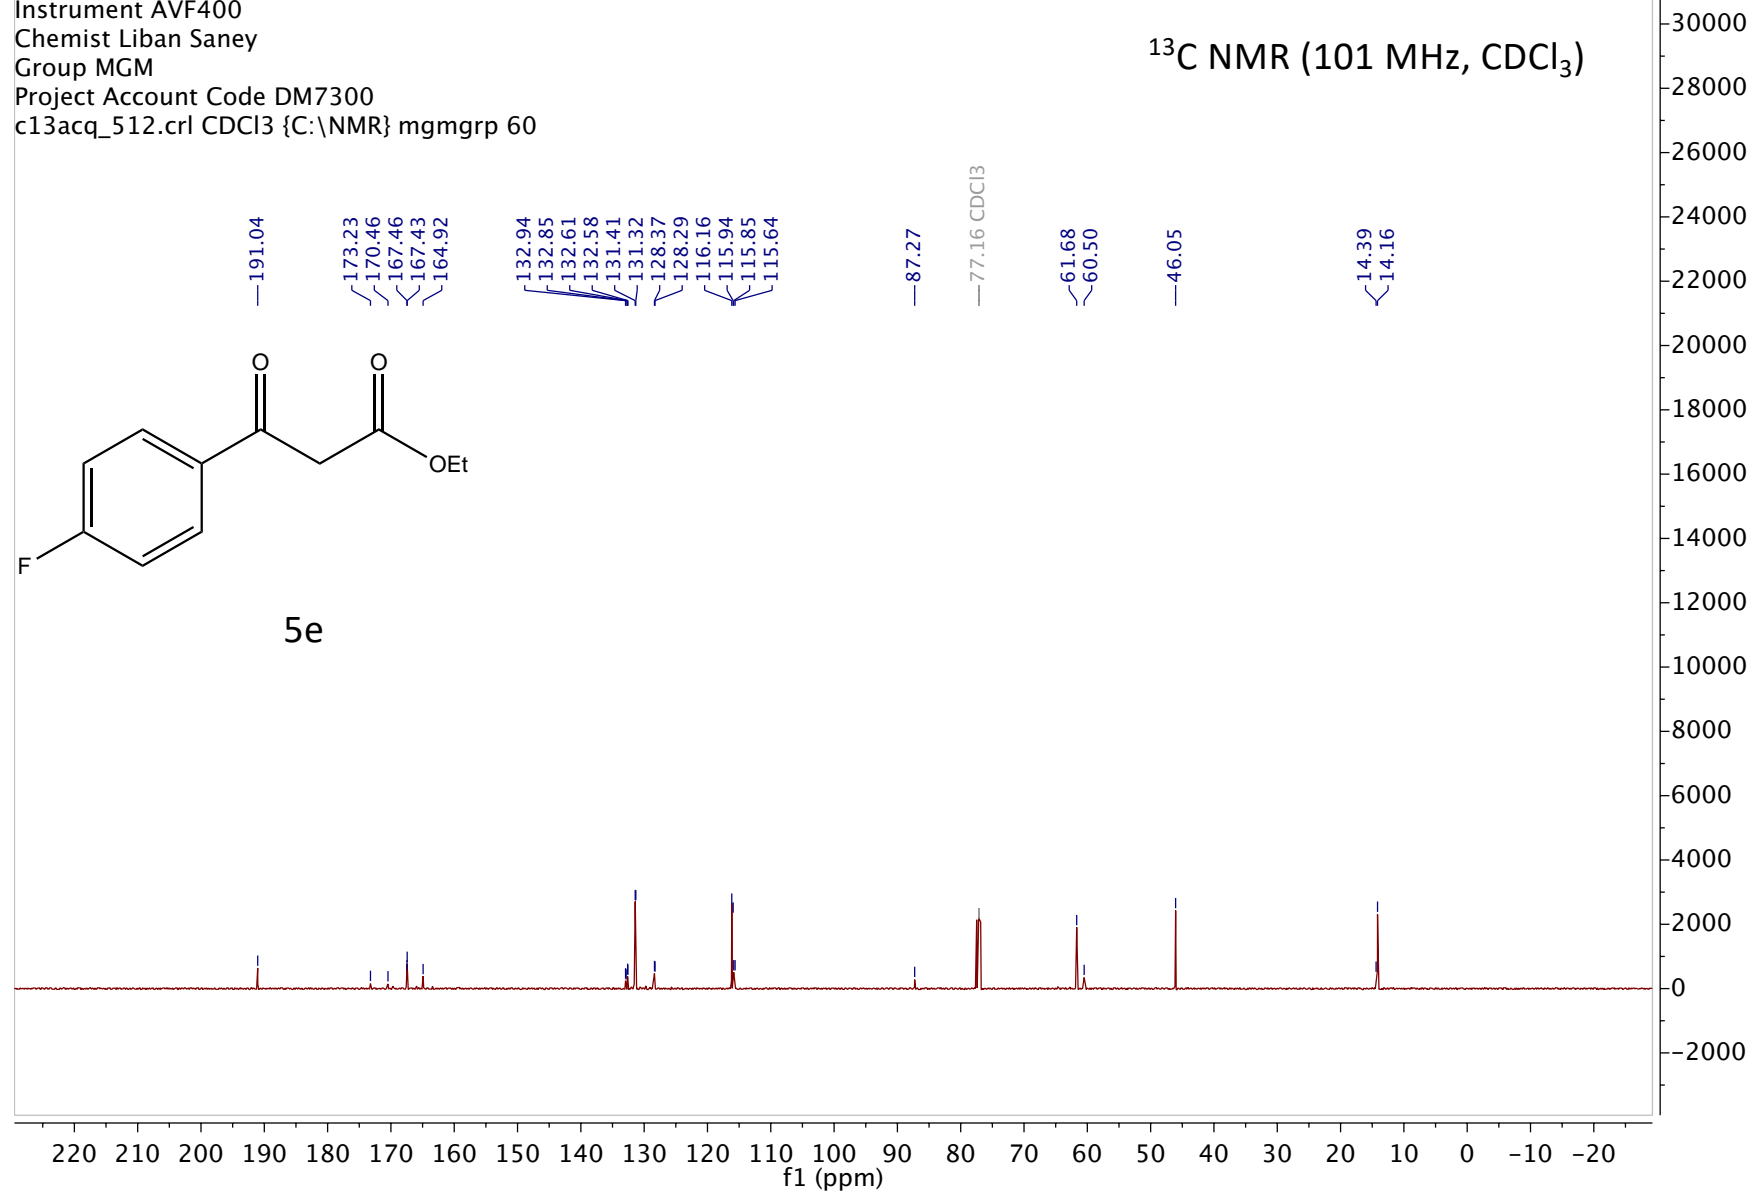

Sep08-2019-60-LS526(C).8.fid  
Instrument AVF400  
Chemist Liban Saney  
Group MGM  
Project Account Code DM7300  
f19dec.crl CDCl3 {C:\NMR} mgmgrp 60

$^{19}\text{F}$  NMR (377 MHz,  $\text{CDCl}_3$ )

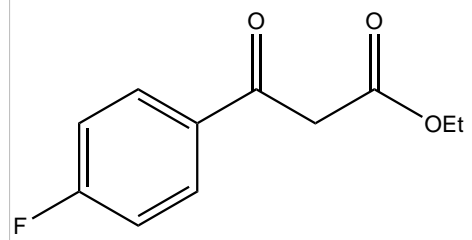

5e

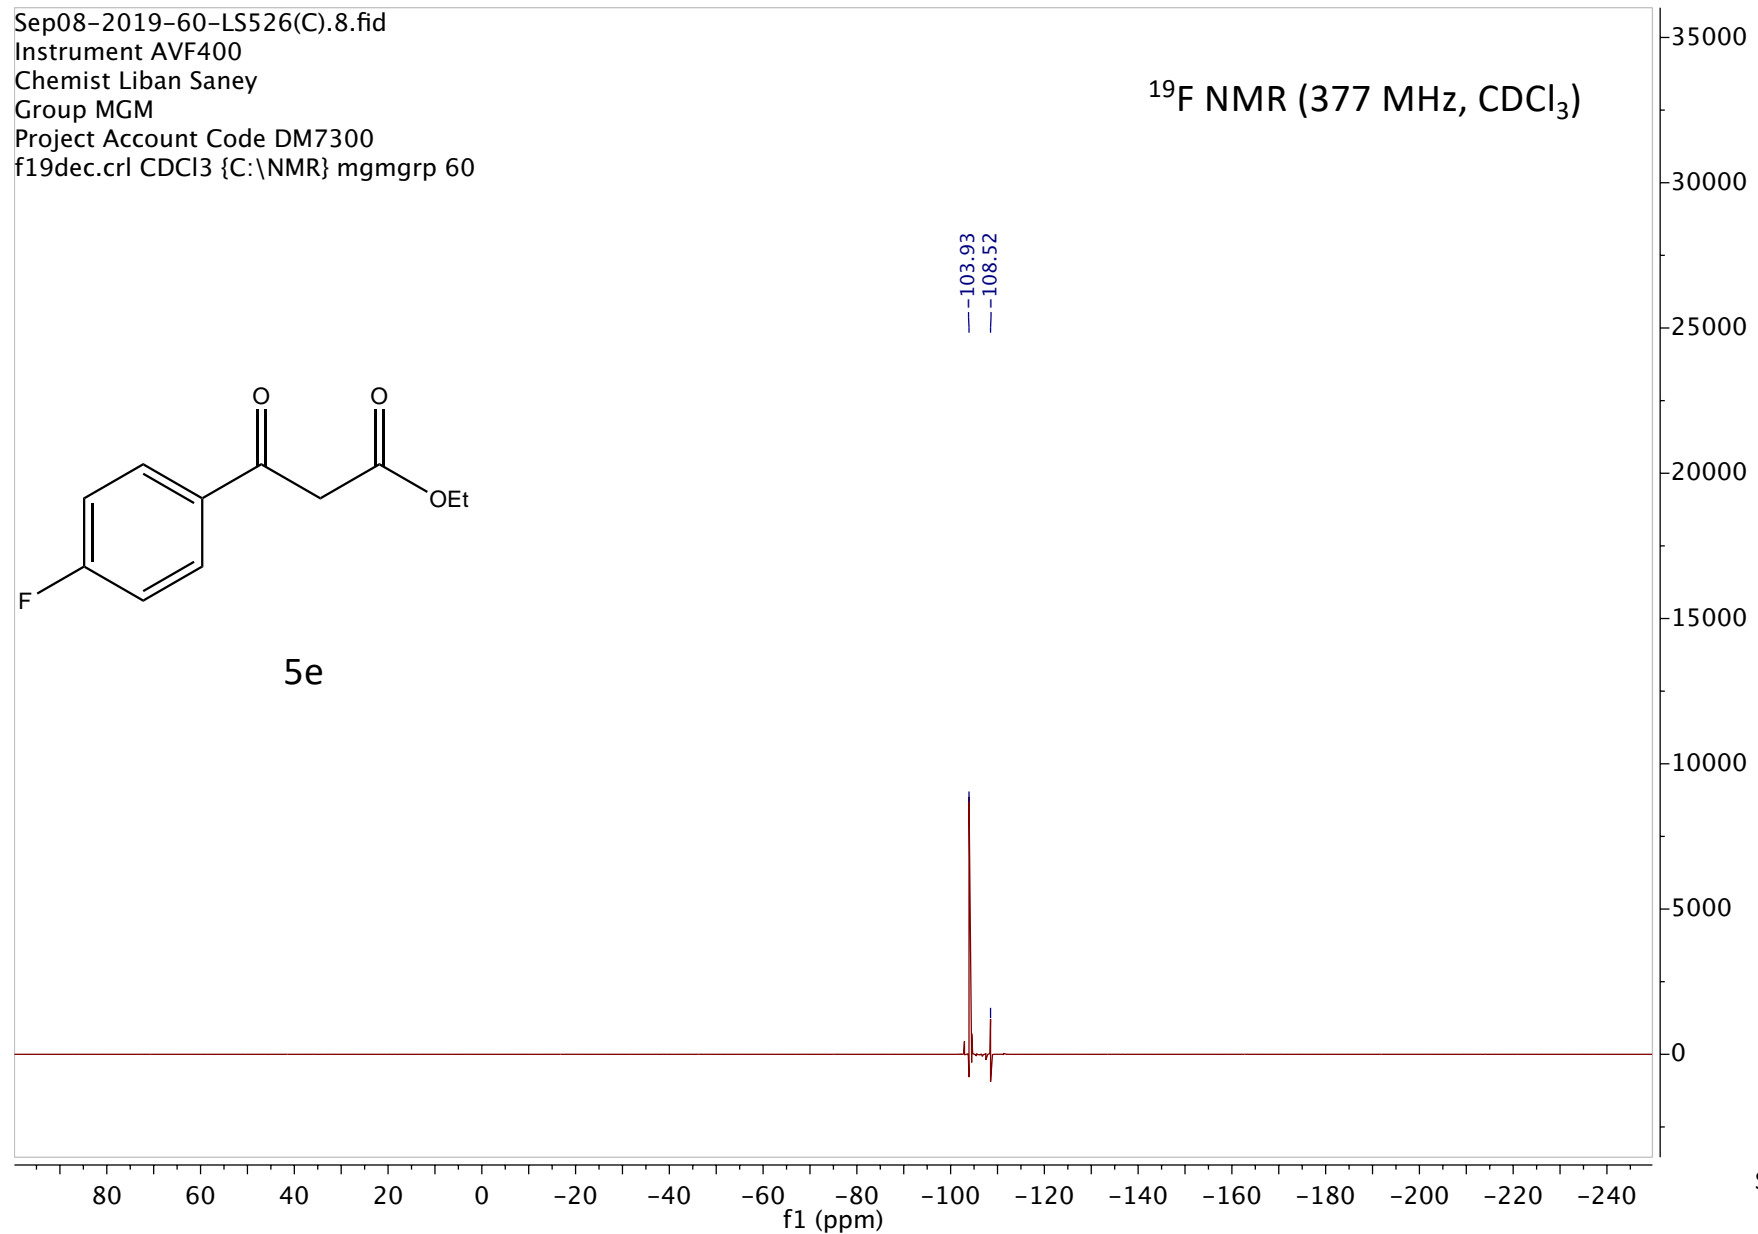

Sep08-2019-60-LS527(C).1.fid  
Instrument AVF400  
Chemist Liban Saney  
Group MGM  
Project Account Code DM7300  
h1acq.crl CDCl3 {C:\NMR} mgmgrp 60

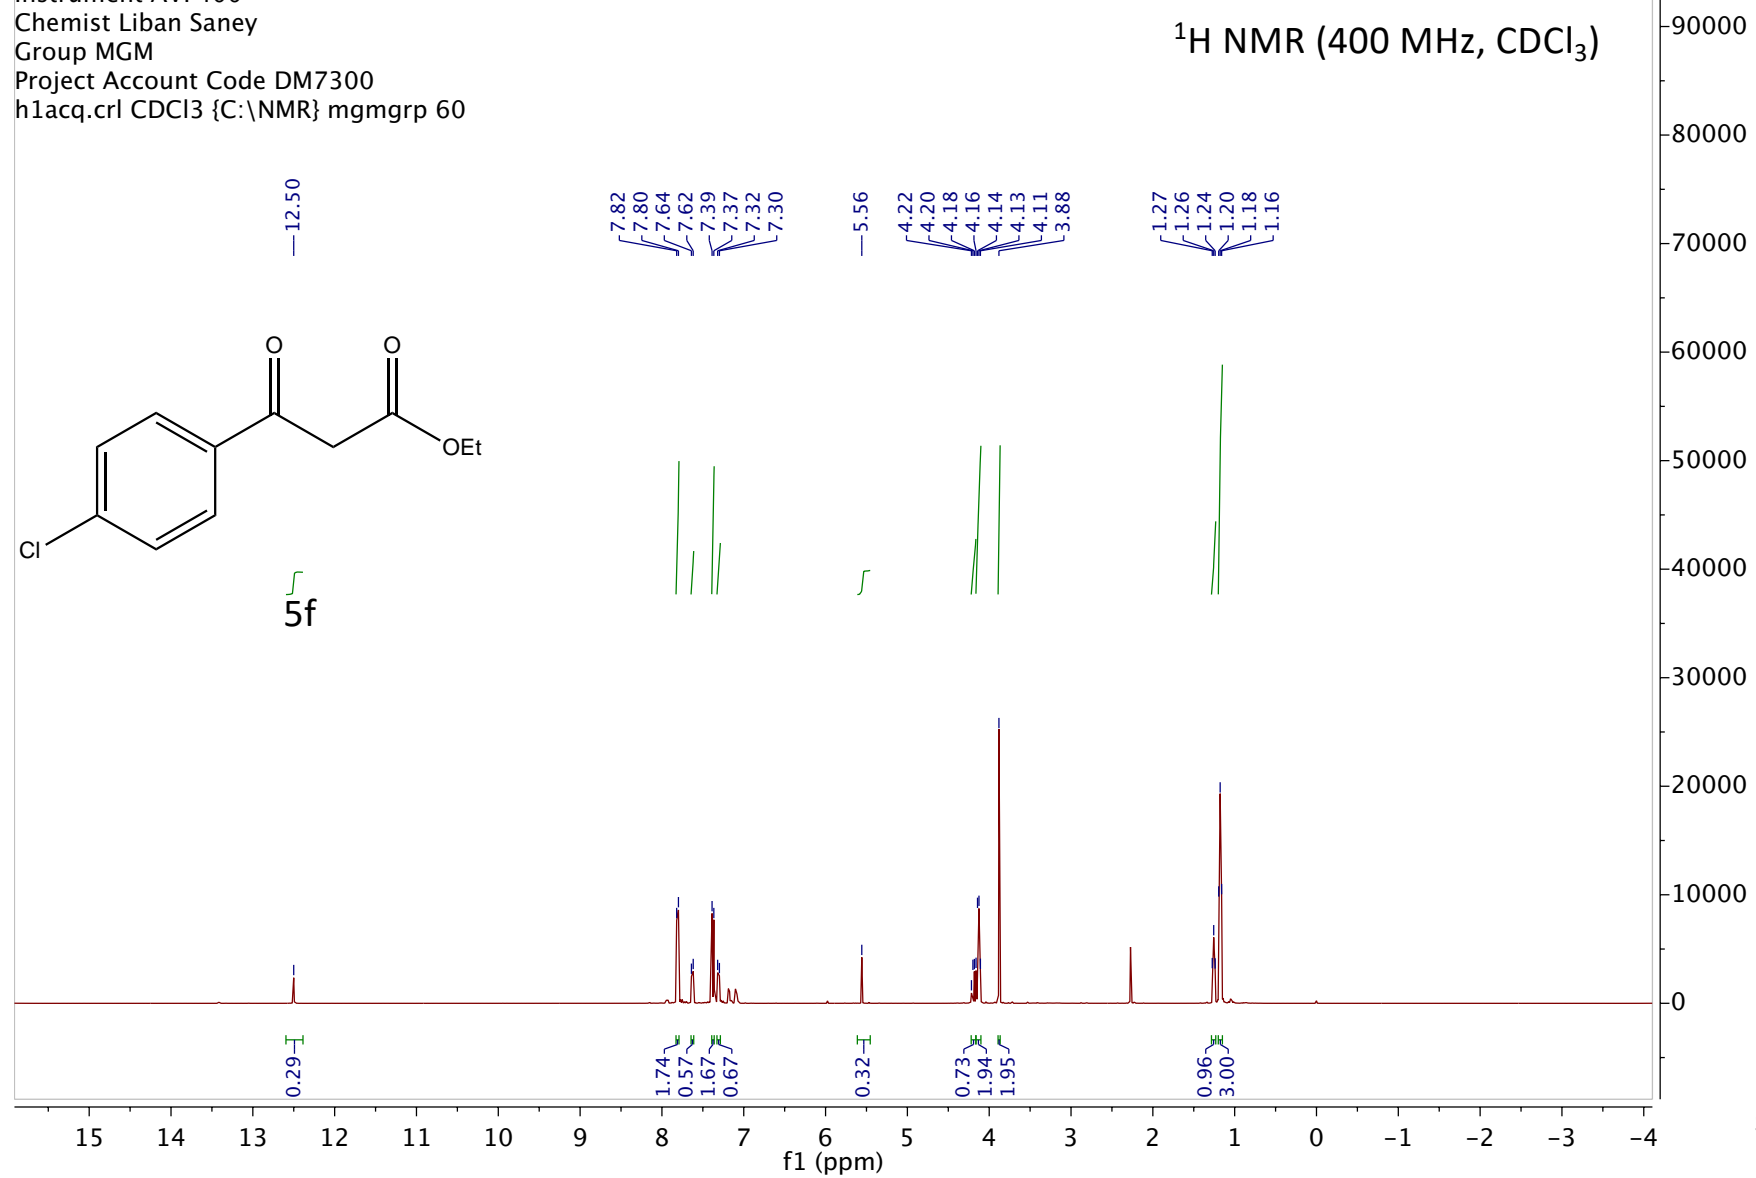



Sep08-2019-60-LS527(C).4.fid  
Instrument AVF400  
Chemist Liban Saney  
Group MGM  
Project Account Code DM7300  
c13acq\_512.crl CDCl3 {C:\NMR} mgmgrp 60

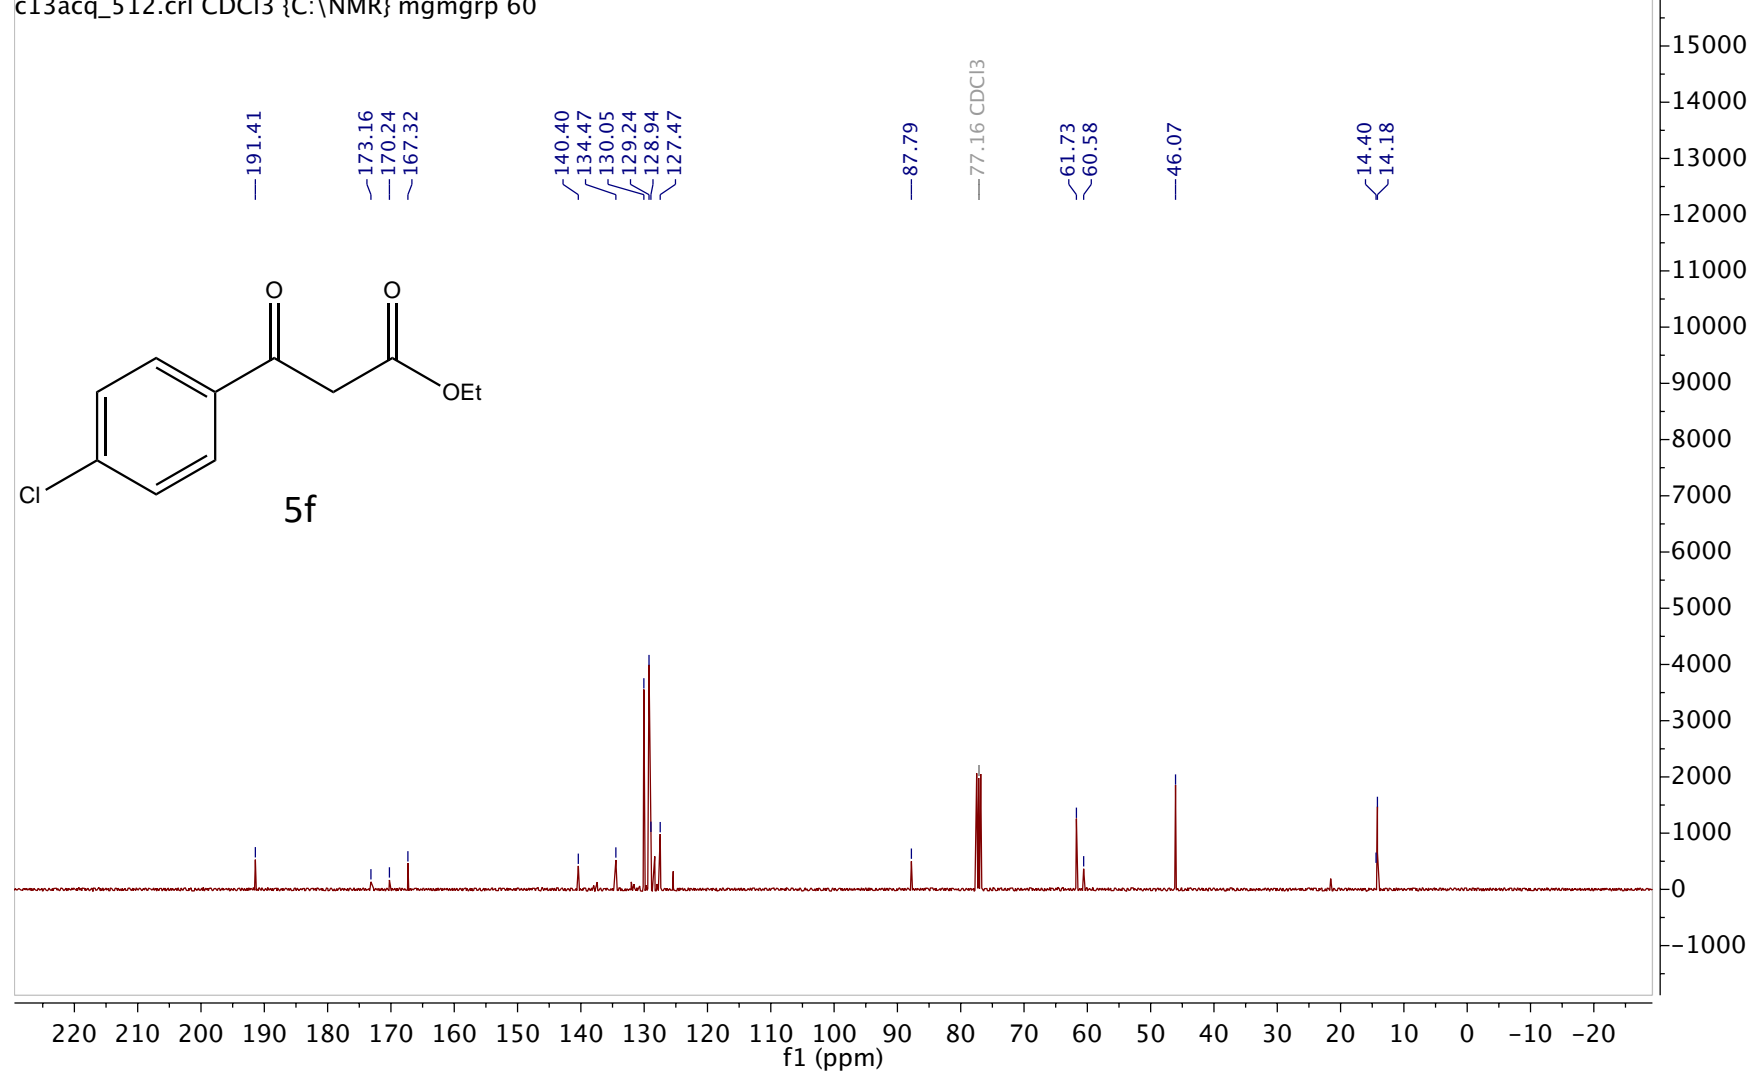

Aug26-2019-60-LS503(C).1.fid  
Instrument AVF400  
Chemist Liban Saney  
Group MGM  
Project Account Code DM7300  
h1acq.crl CDCl3 {C:\NMR} mgmgrp 60

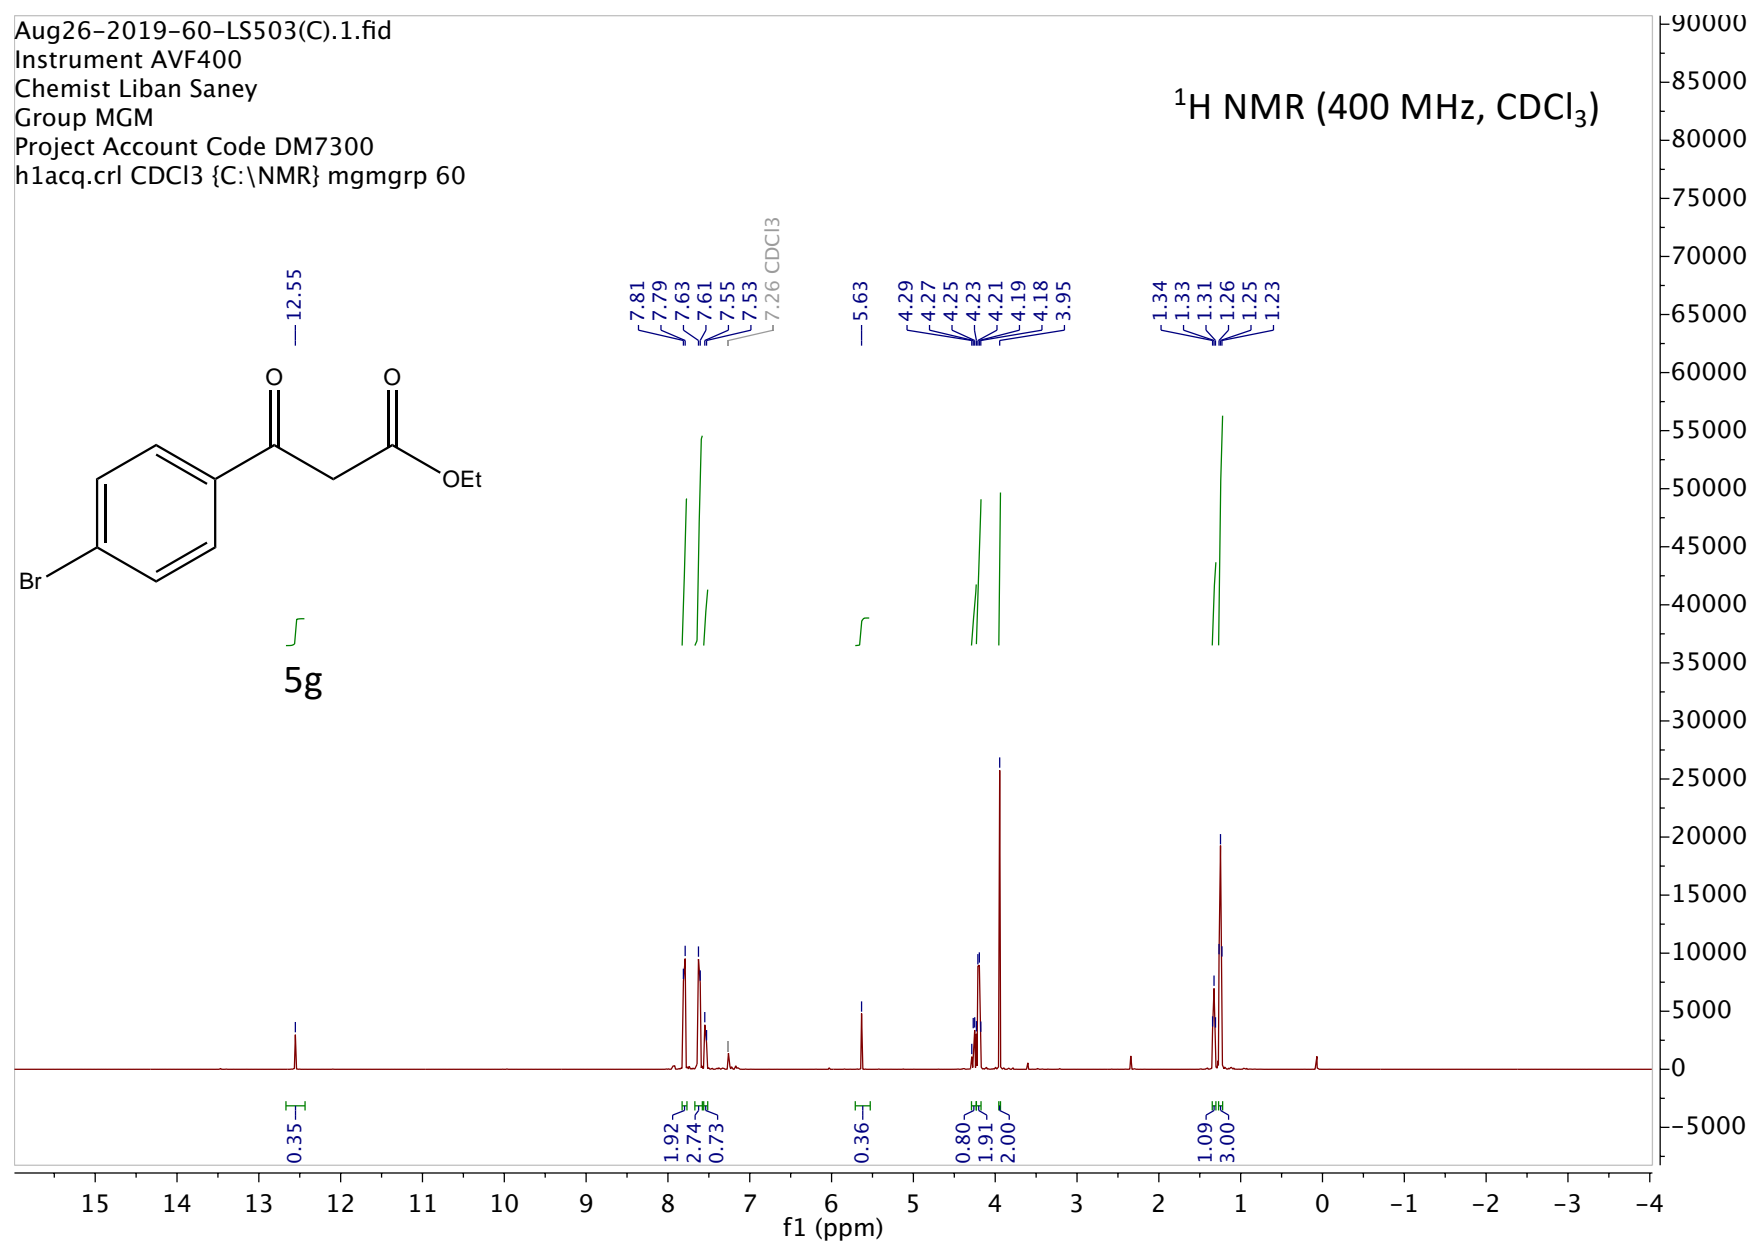

Aug26-2019-60-LS503(C).4.fid  
Instrument AVF400  
Chemist Liban Saney  
Group MGM  
Project Account Code DM7300  
c13acq\_512.crl CDCl3 {C:\NMR} mgmgrp 60

<sup>13</sup>C NMR (101 MHz, CDCl<sub>3</sub>)

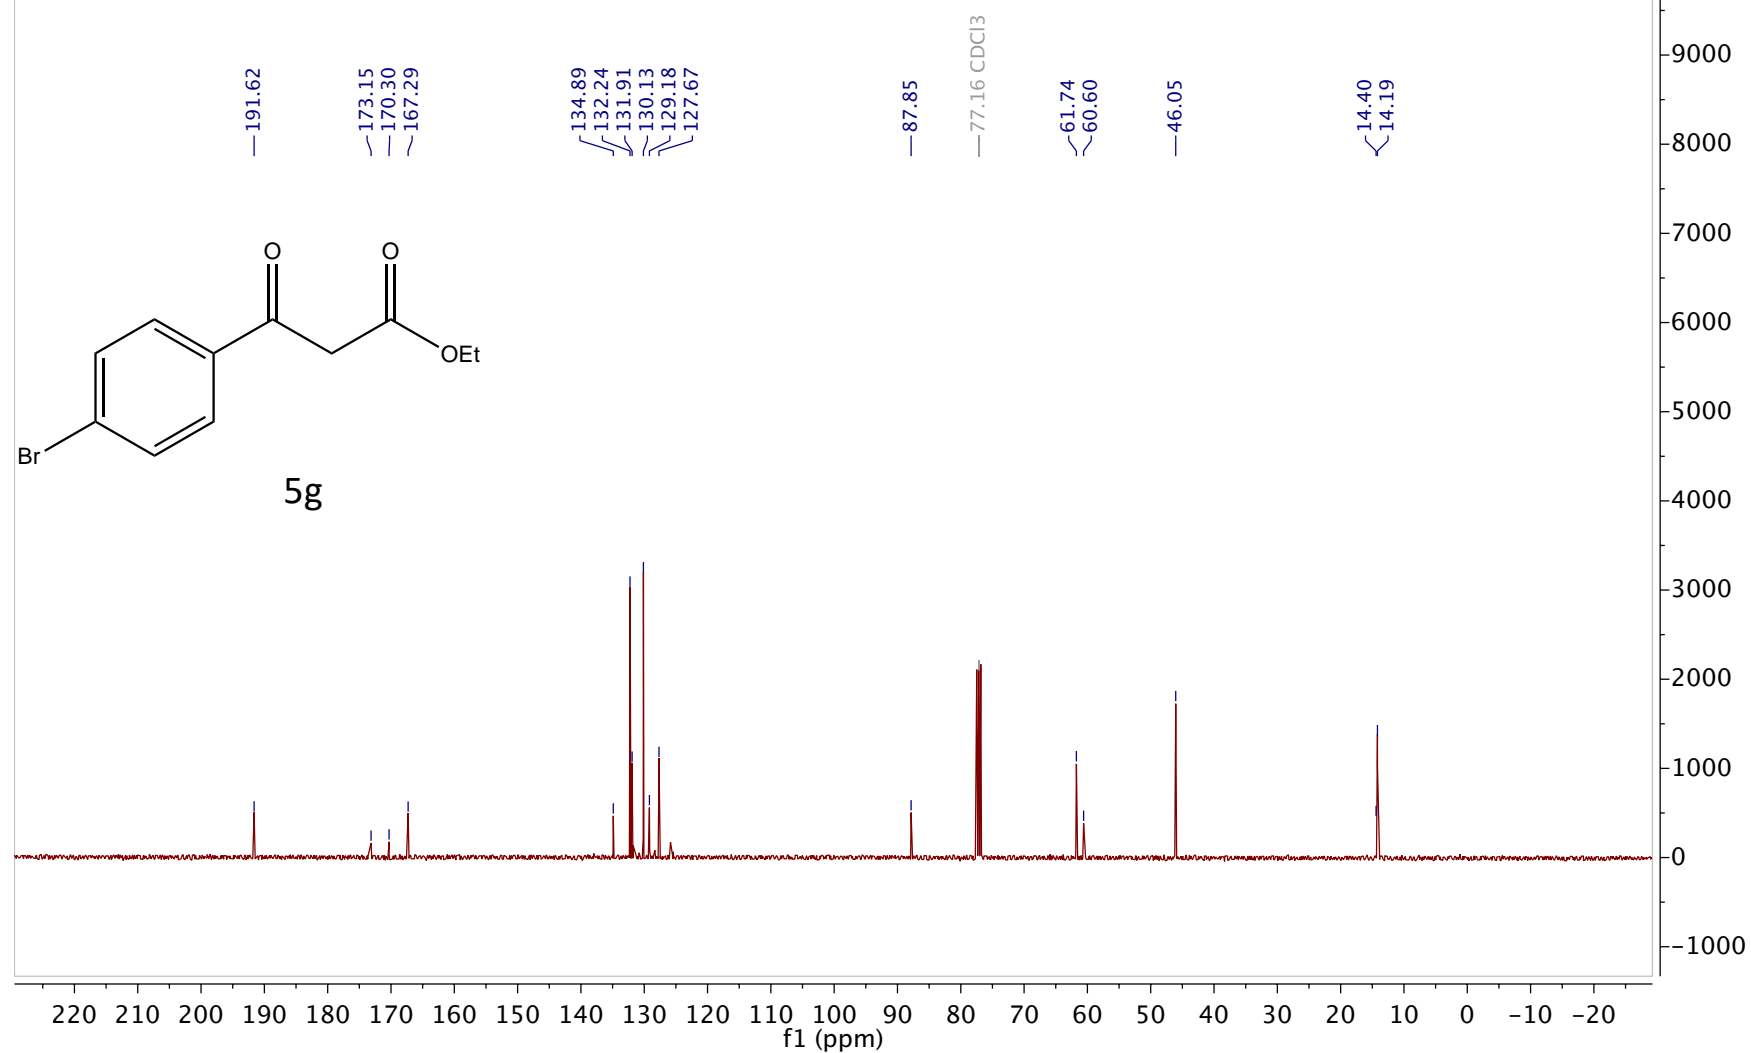

Aug20-2019-59-LS494(C).1.fid  
Instrument AVF400  
Chemist Liban Saney  
Group MGM  
Project Account Code DM7300  
h1acq.crl CDCl3 {C:\NMR} mgmgrp 59

<sup>1</sup>H NMR (400 MHz, CDCl<sub>3</sub>)

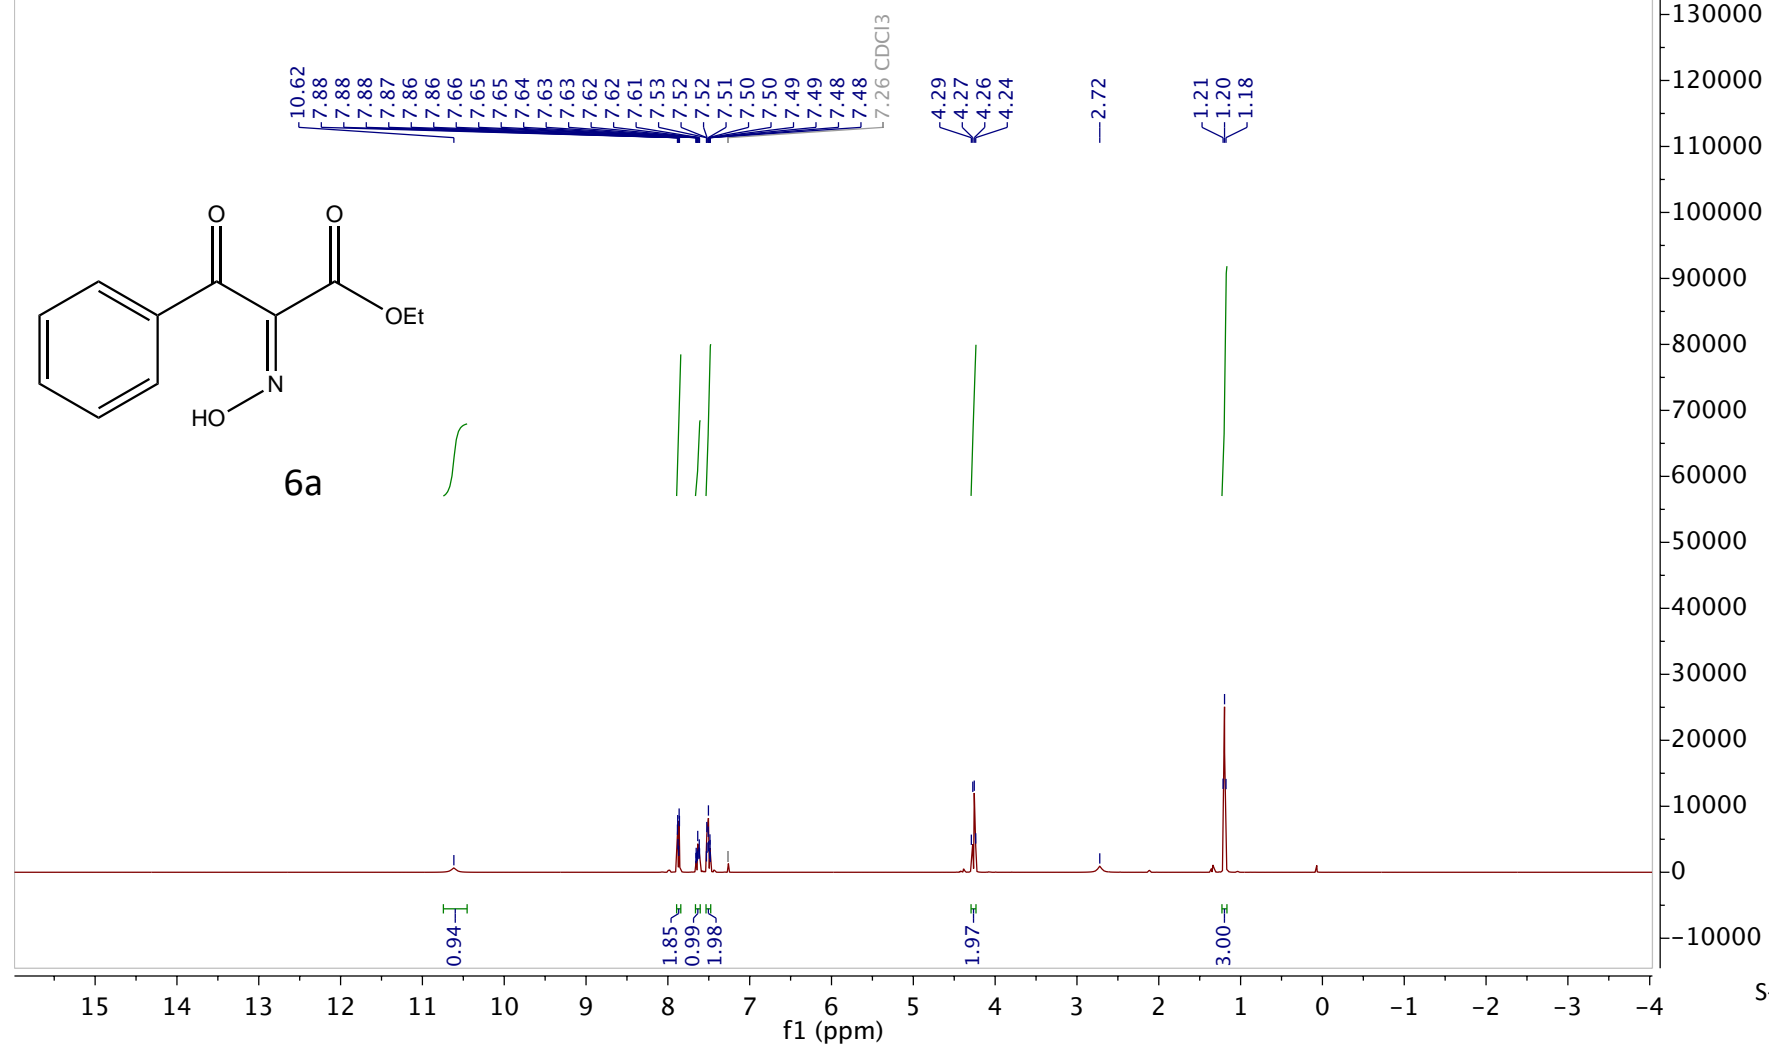

Aug20-2019-59-LS494(C).2.fid  
Instrument AVF400  
Chemist Liban Saney  
Group MGM  
Project Account Code DM7300  
c13acq\_512.crl CDCl3 {C:\NMR} mgmgrp 59

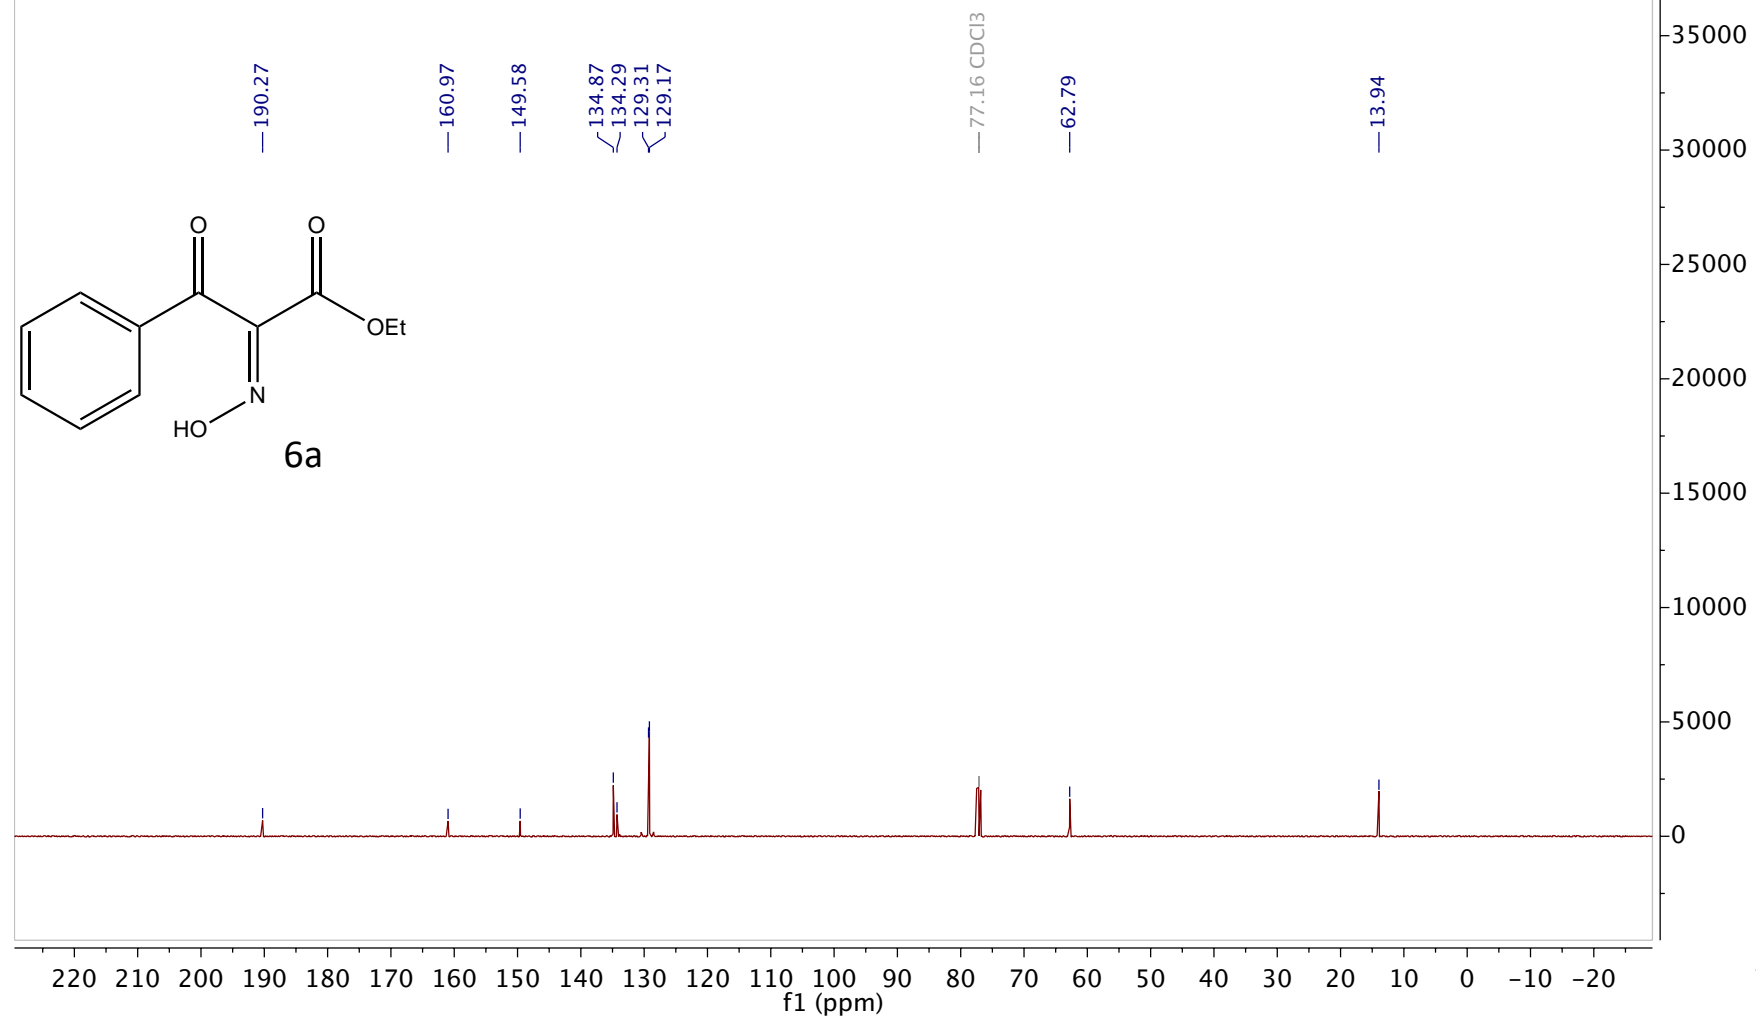

Aug20-2019-58-LS493(C).1.fid  
Instrument AVF400  
Chemist Liban Saney  
Group MGM  
Project Account Code DM7300  
h1acq.crl CDCl3 {C:\NMR} mgmgrp 58

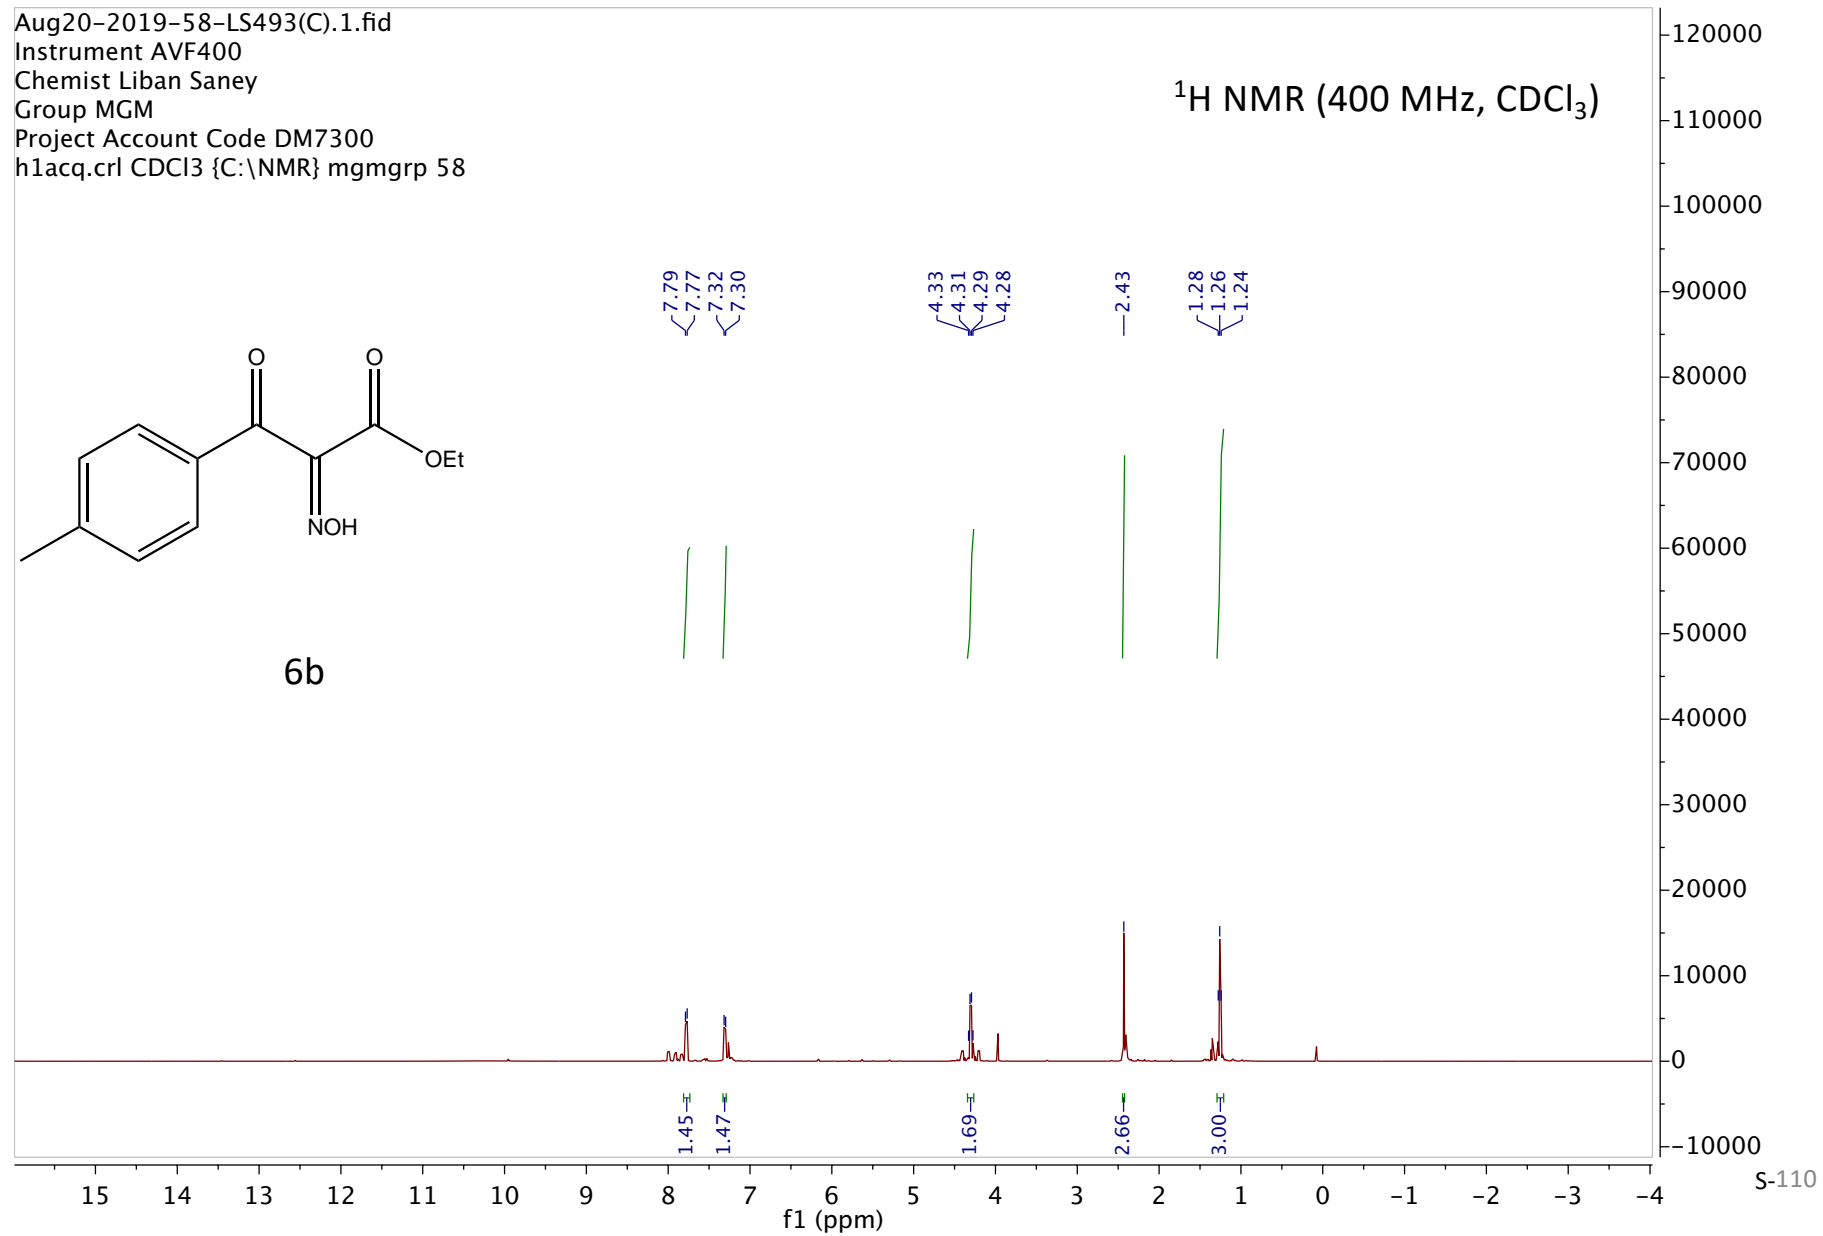

Aug20-2019-58-LS493(C).4.fid  
Instrument AVF400  
Chemist Liban Saney  
Group MGM  
Project Account Code DM7300  
c13acq\_512.crl CDCl3 {C:\NMR} mgmgrp 58

$^{13}\text{C}$  NMR (101 MHz,  $\text{CDCl}_3$ )

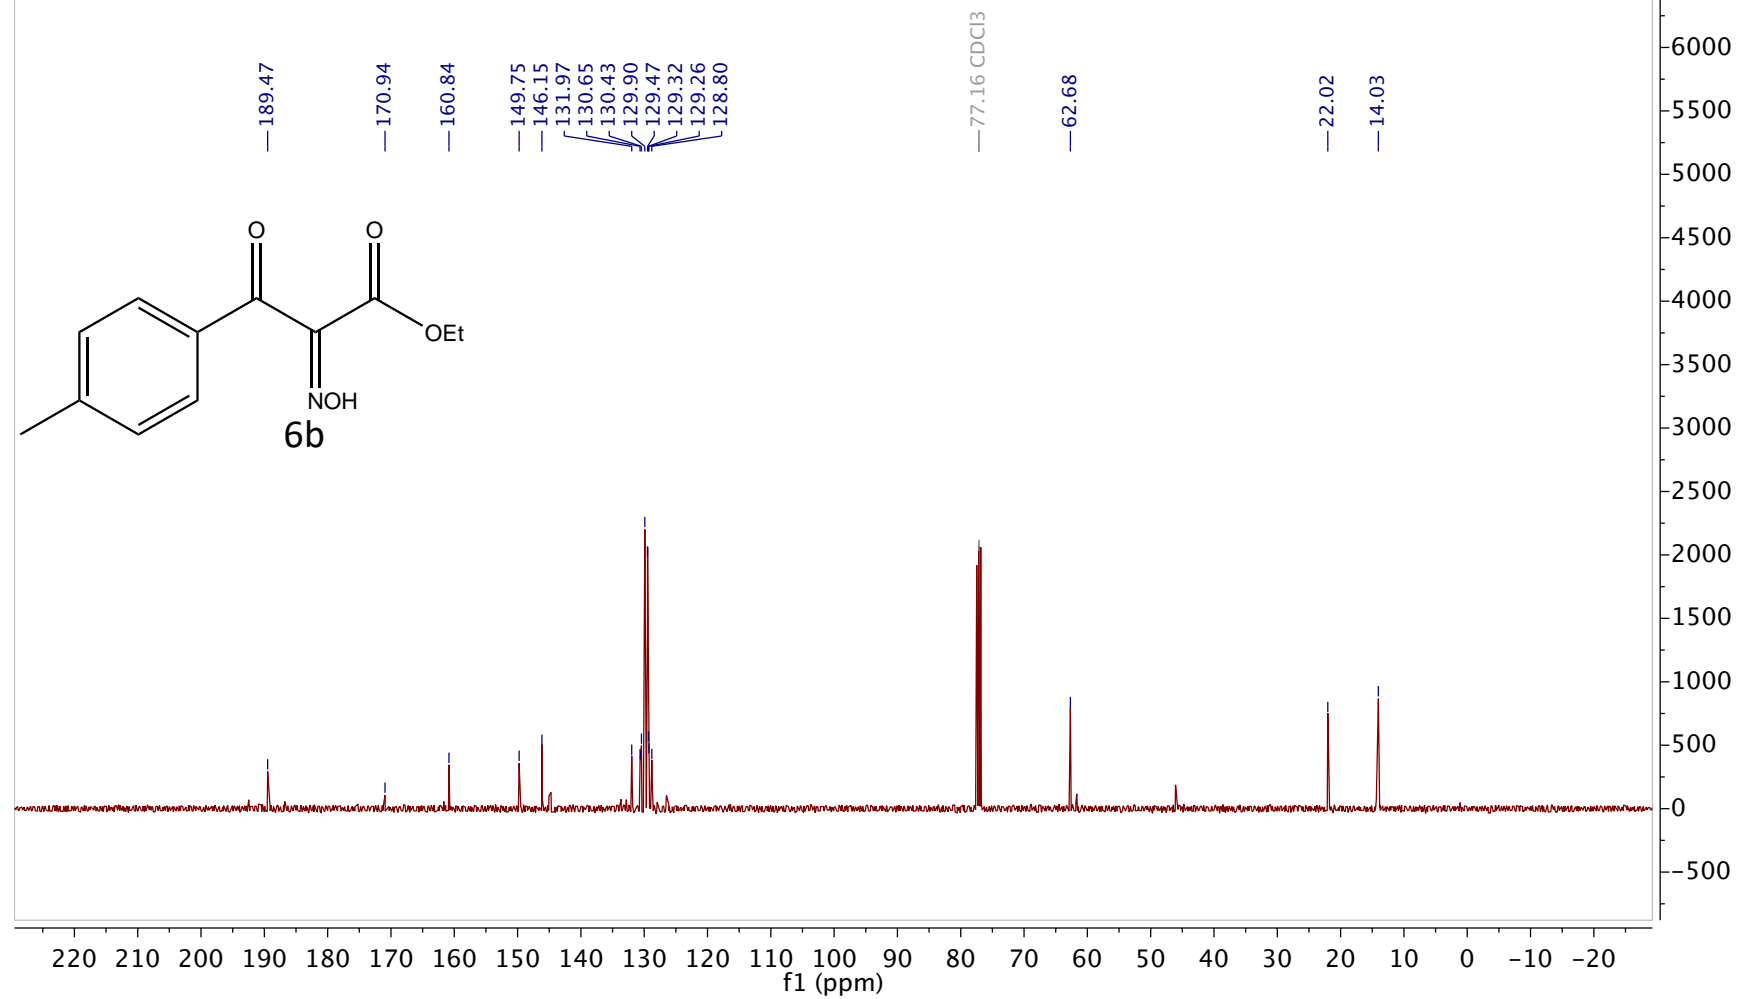

Aug29-2019-60-LS510(C).1.fid  
Instrument AVF400  
Chemist Liban Saney  
Group MGM  
Project Account Code DM7300  
h1acq.crl CDCl3 {C:\NMR} mgmgrp 60

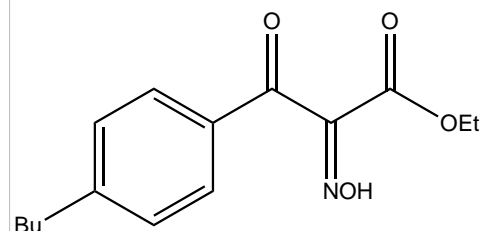

6c

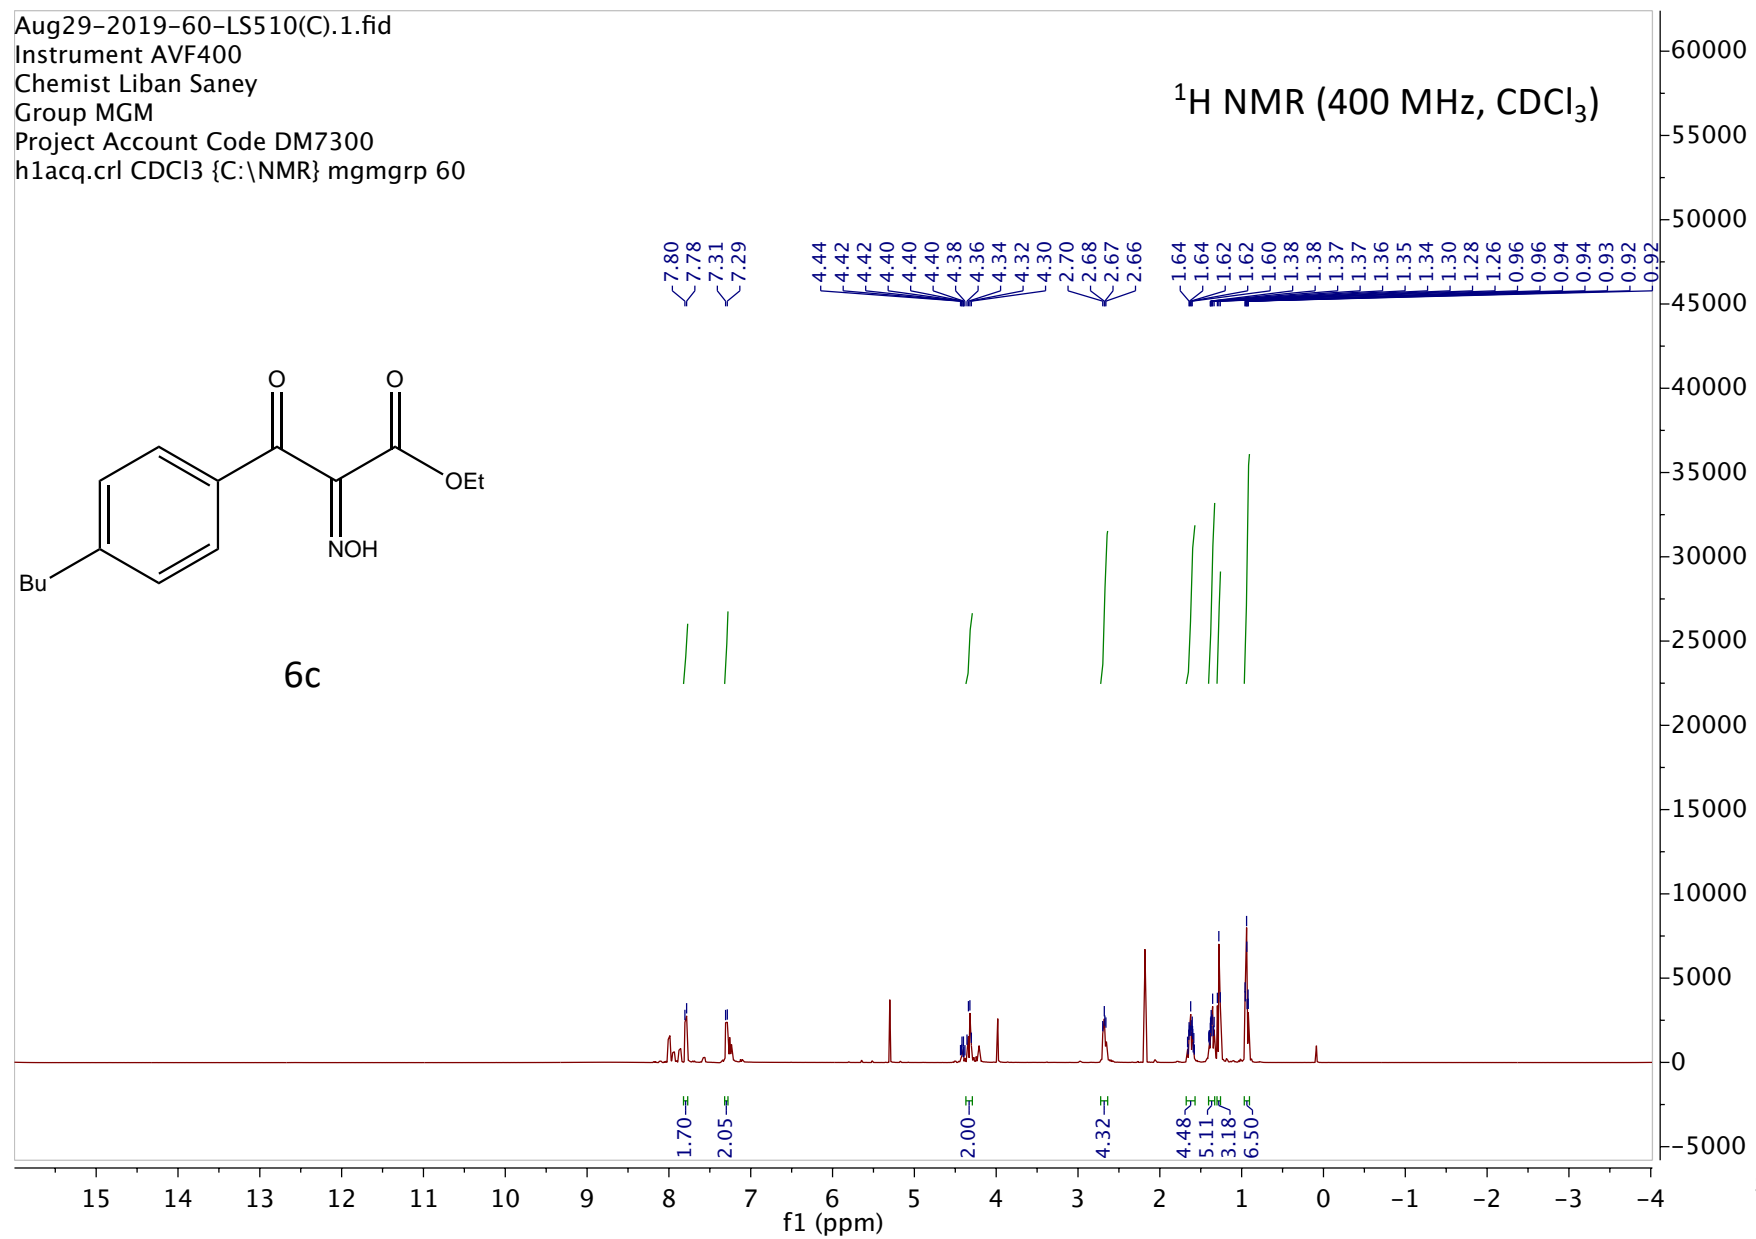



Aug29-2019-60-LS510(C).4.fid  
Instrument AVF400  
Chemist Liban Saney  
Group MGM  
Project Account Code DM7300  
c13acq\_512.crl CDCl3 {C:\NMR} mgmgrp 60

<sup>13</sup>C NMR (101 MHz, CDCl<sub>3</sub>)

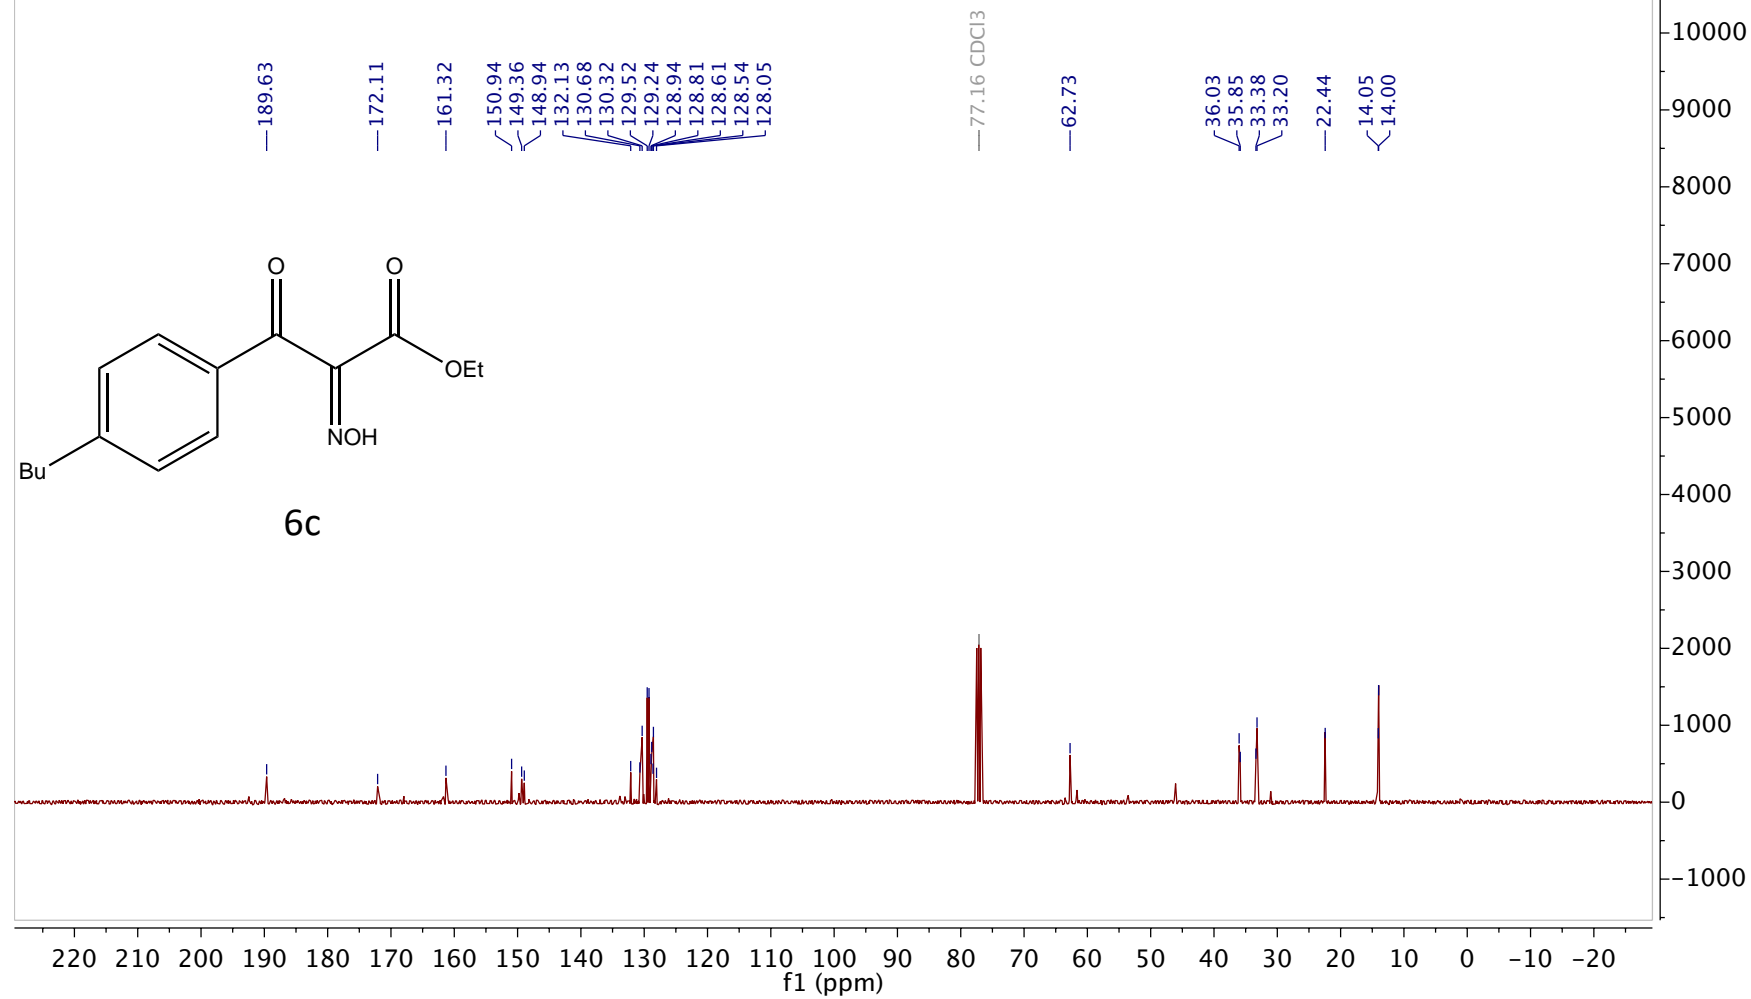

Aug23-2019-60-LS499(C).1.fid  
Instrument AVF400  
Chemist Liban Saney  
Group MGM  
Project Account Code DM7300  
h1acq.crl CDCl3 {C:\NMR} mgmgrp 60

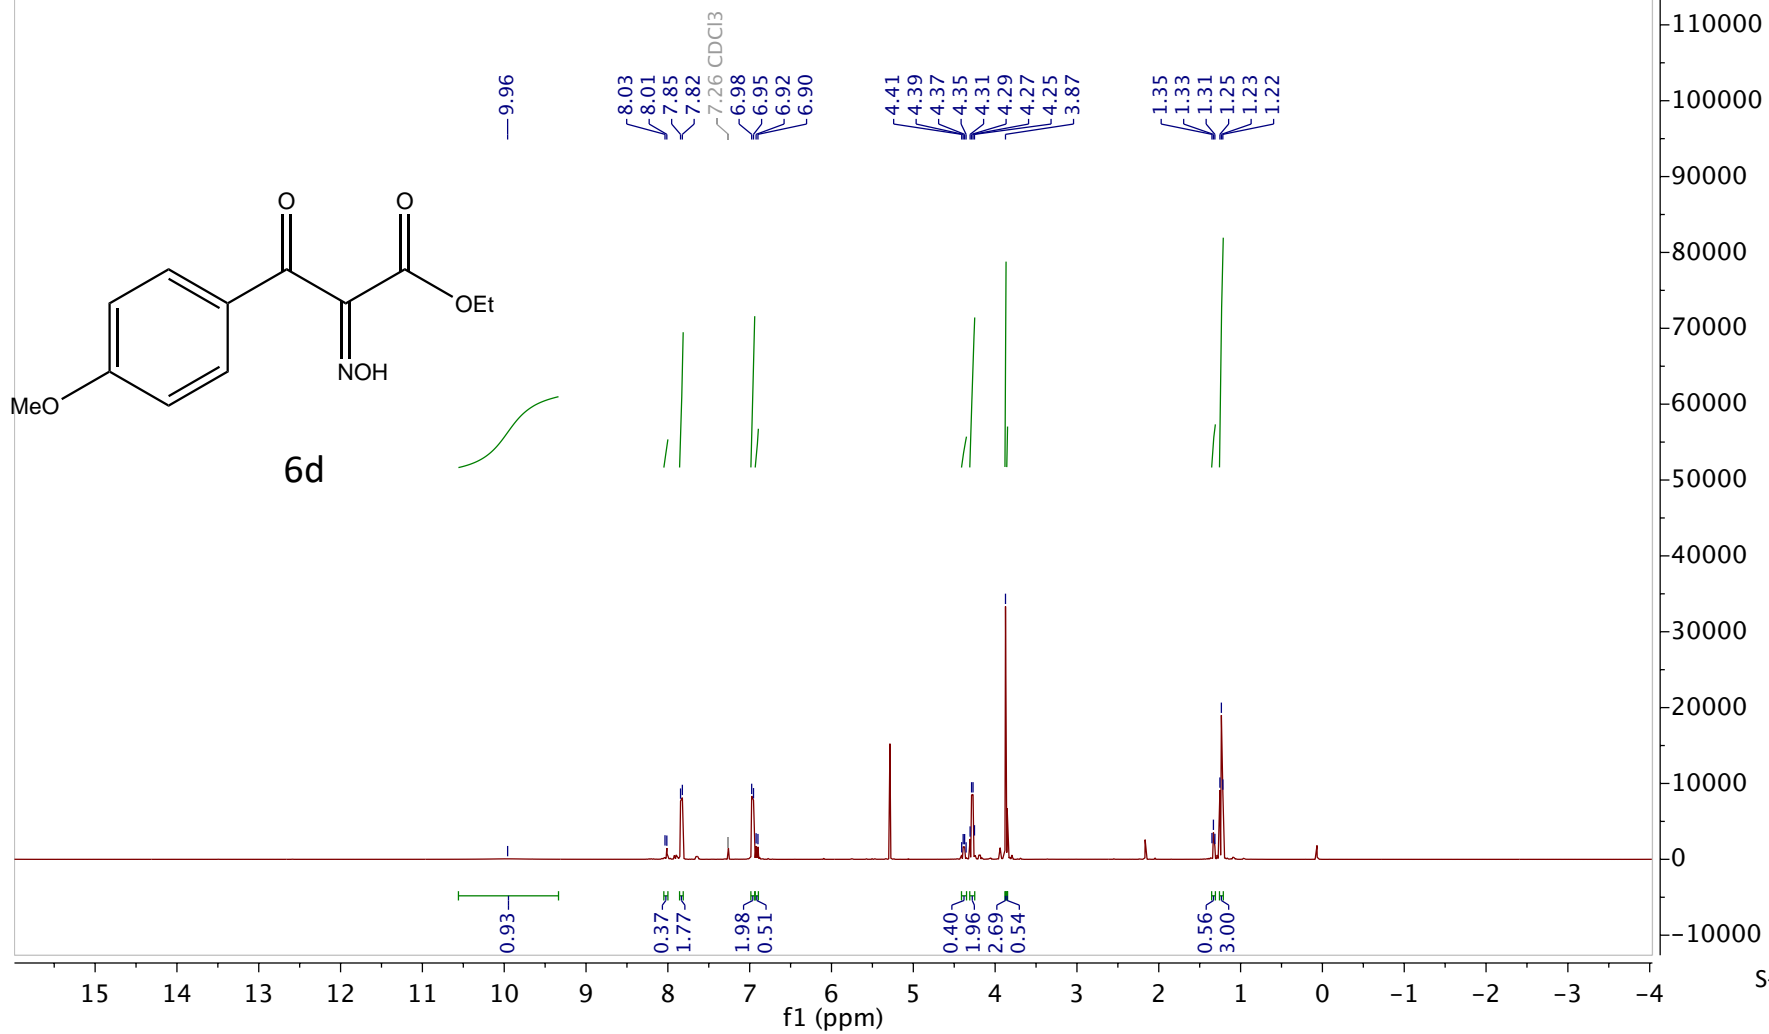

Aug23-2019-60-LS499(C).4.fid  
Instrument AVF400  
Chemist Liban Saney  
Group MGM  
Project Account Code DM7300  
c13acq\_512.crl CDCl3 {C:\NMR} mgmgrp 60

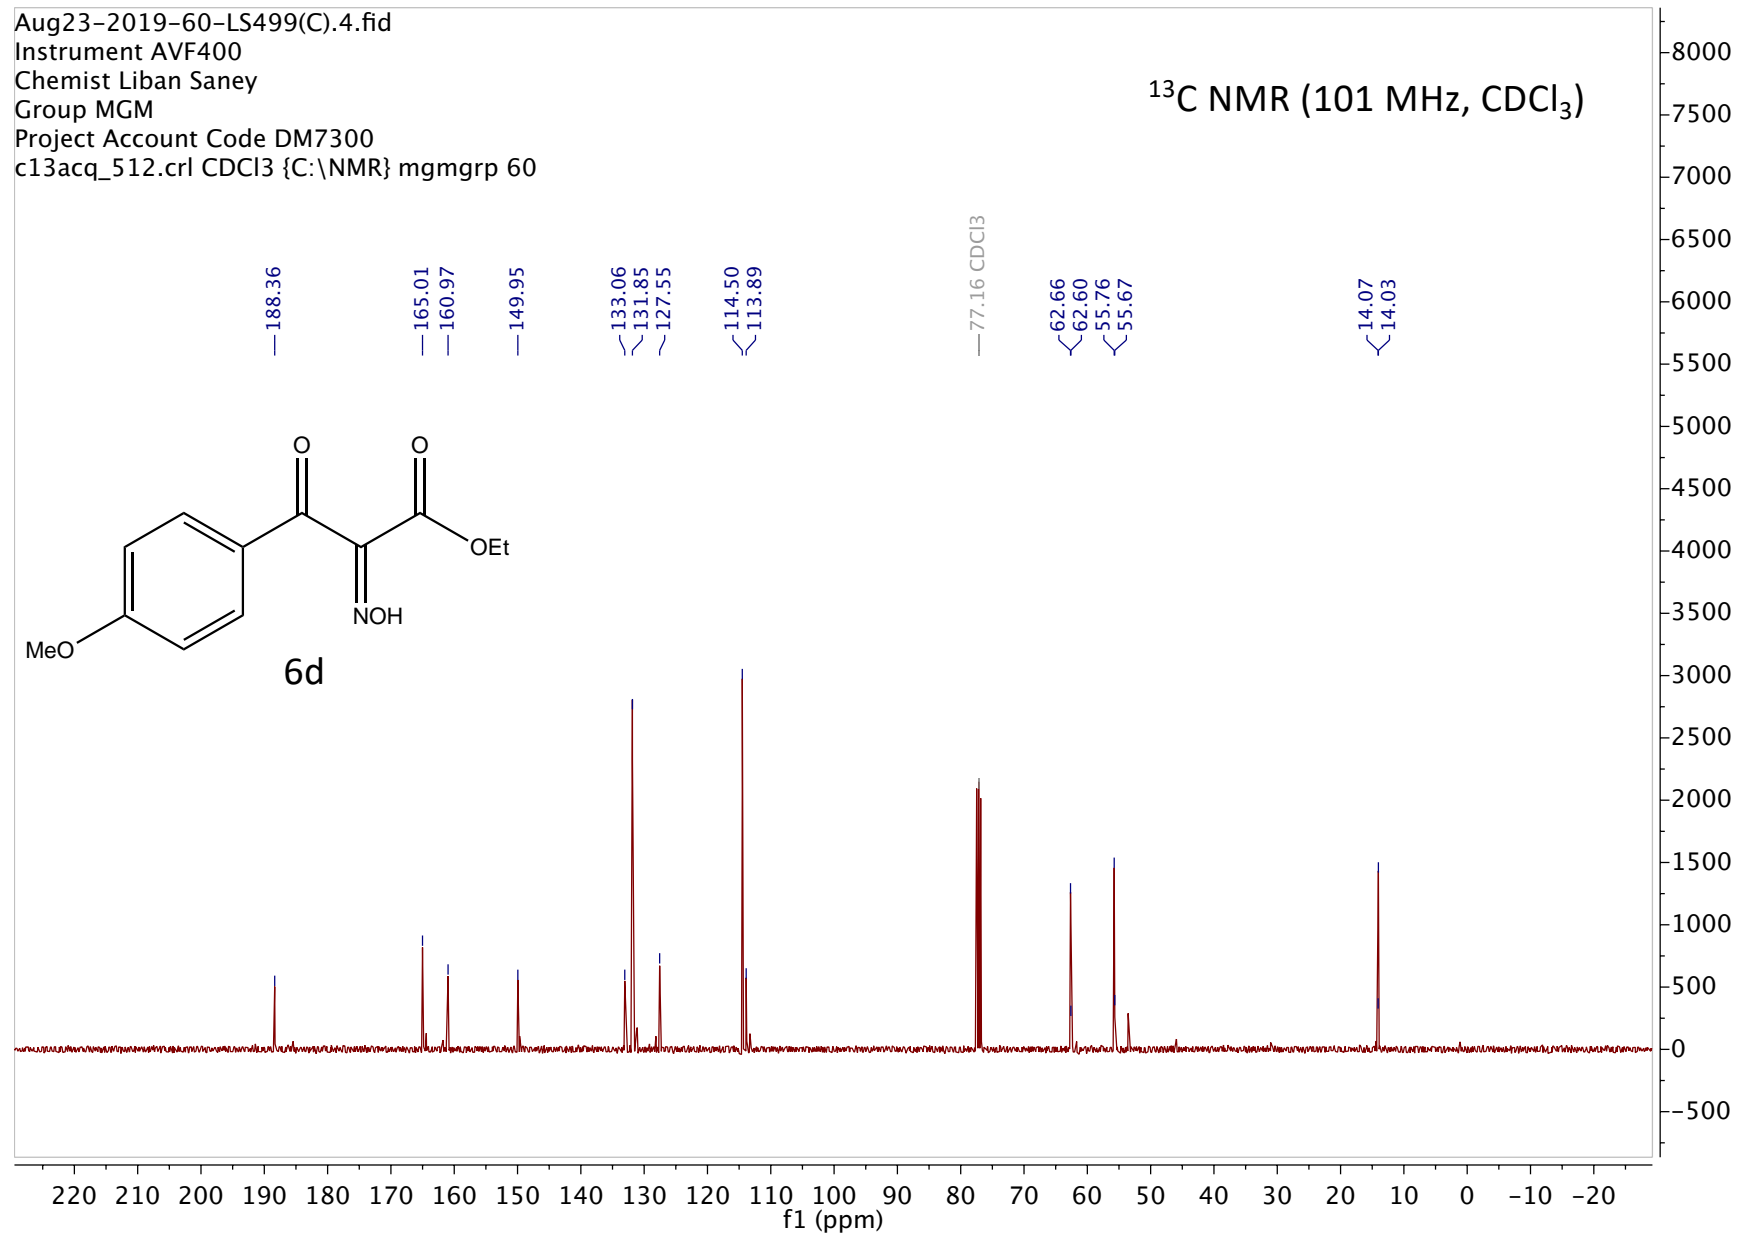

Sep11-2019-54-LS528(C).1.fid  
Instrument AVF400  
Chemist Liban Saney  
Group MGM  
Project Account Code DM7300  
h1acq.crl CDCl3 {C:\NMR} mgmgrp 54

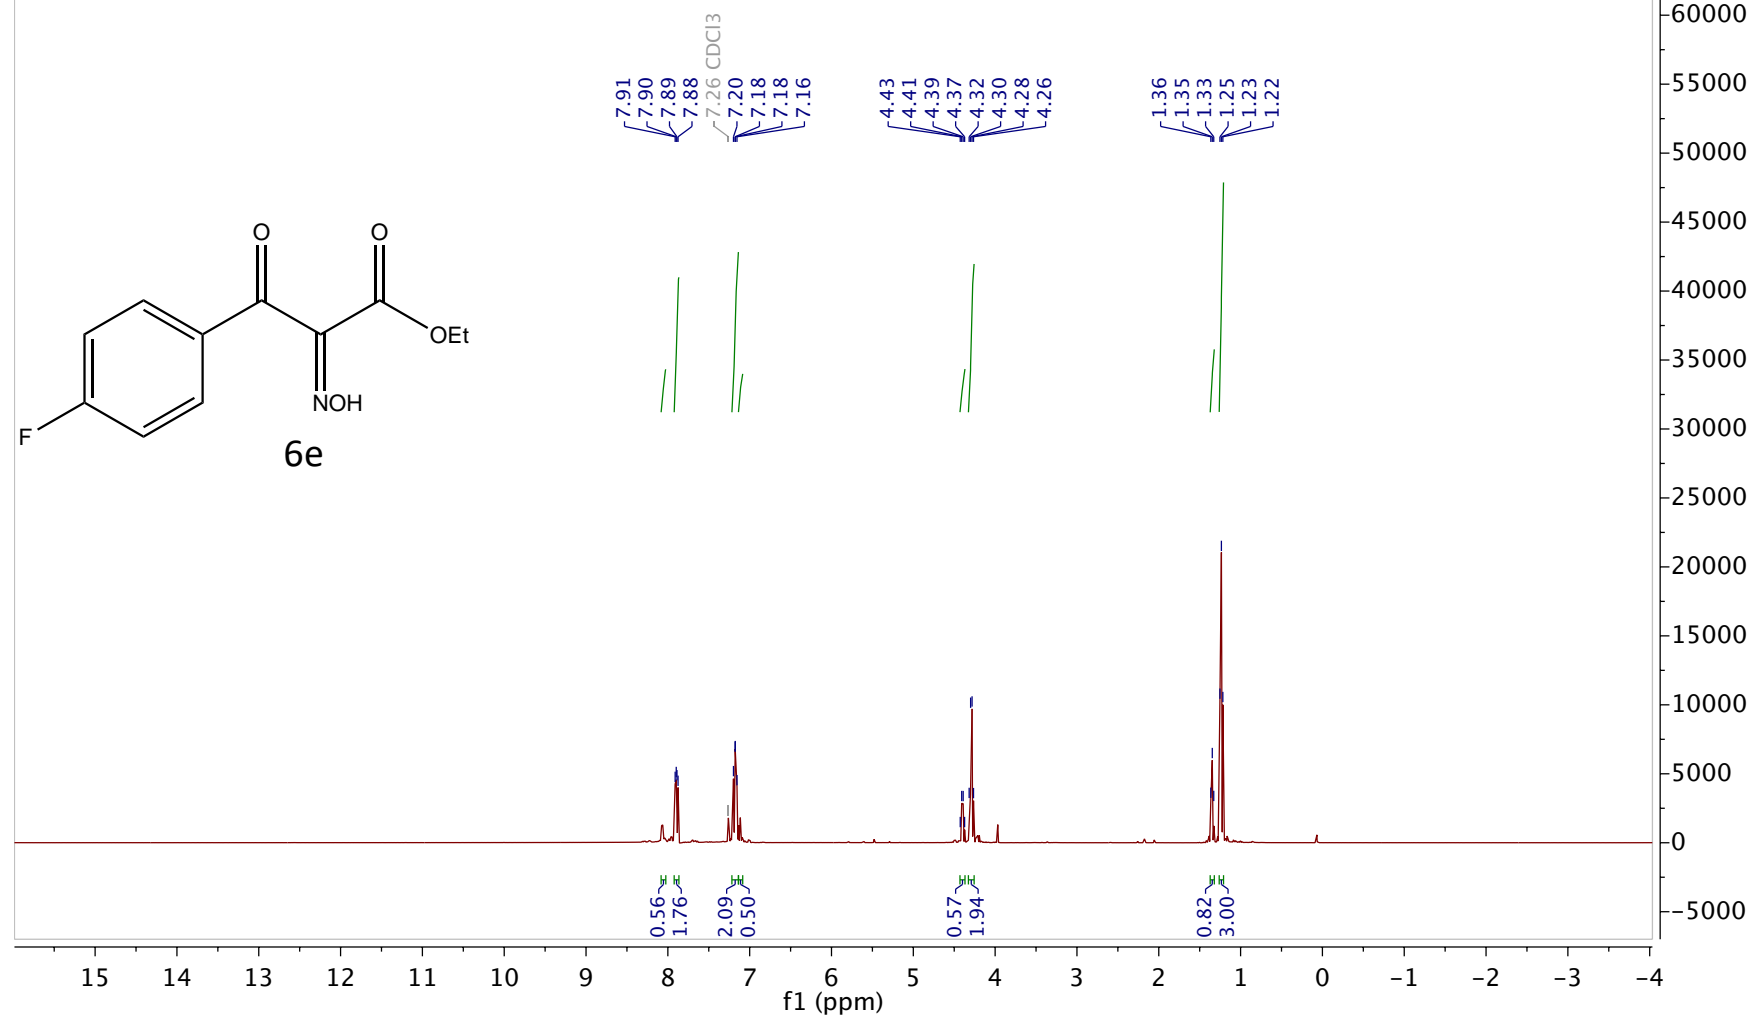

Sep11-2019-54-LS528(C).4.fid  
Instrument AVF400  
Chemist Liban Saney  
Group MGM  
Project Account Code DM7300  
c13acq\_512.crl CDCl3 {C:\NMR} mgmgrp 54

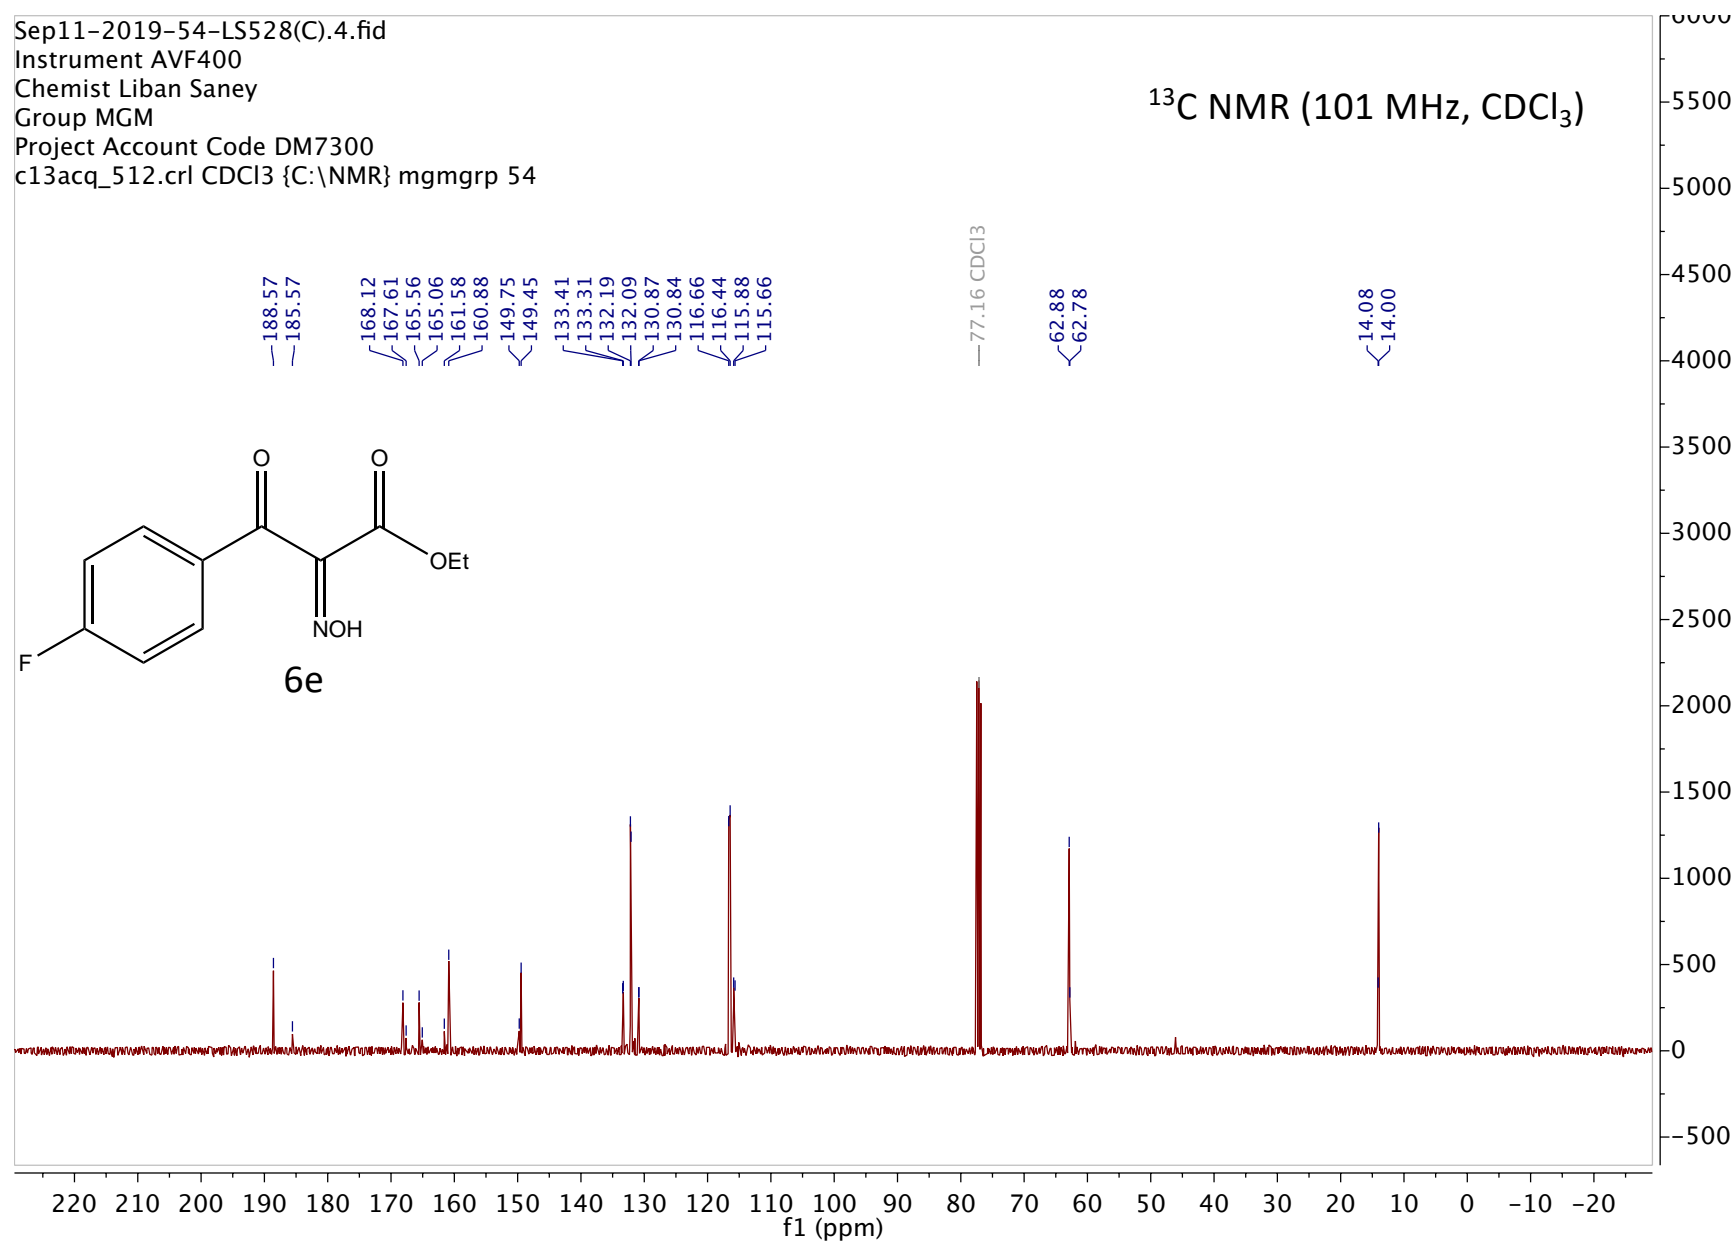

Sep11-2019-54-LS528(C).7.fid  
Instrument AVF400  
Chemist Liban Saney  
Group MGM  
Project Account Code DM7300  
f19acq\_256.crl CDCl3 {C:\NMR} mgmgrp 54

$^{19}\text{F}$  NMR (377 MHz,  $\text{CDCl}_3$ )

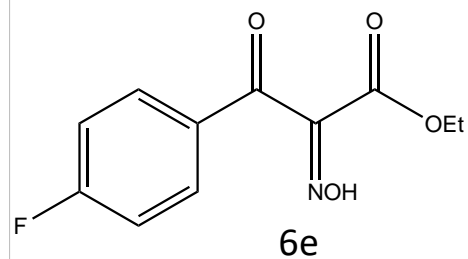

101.63  
101.65  
101.65  
101.66  
101.67  
101.68  
101.68  
101.69  
101.70  
103.38  
103.39  
103.40  
103.40  
103.41  
103.42  
103.43  
103.44

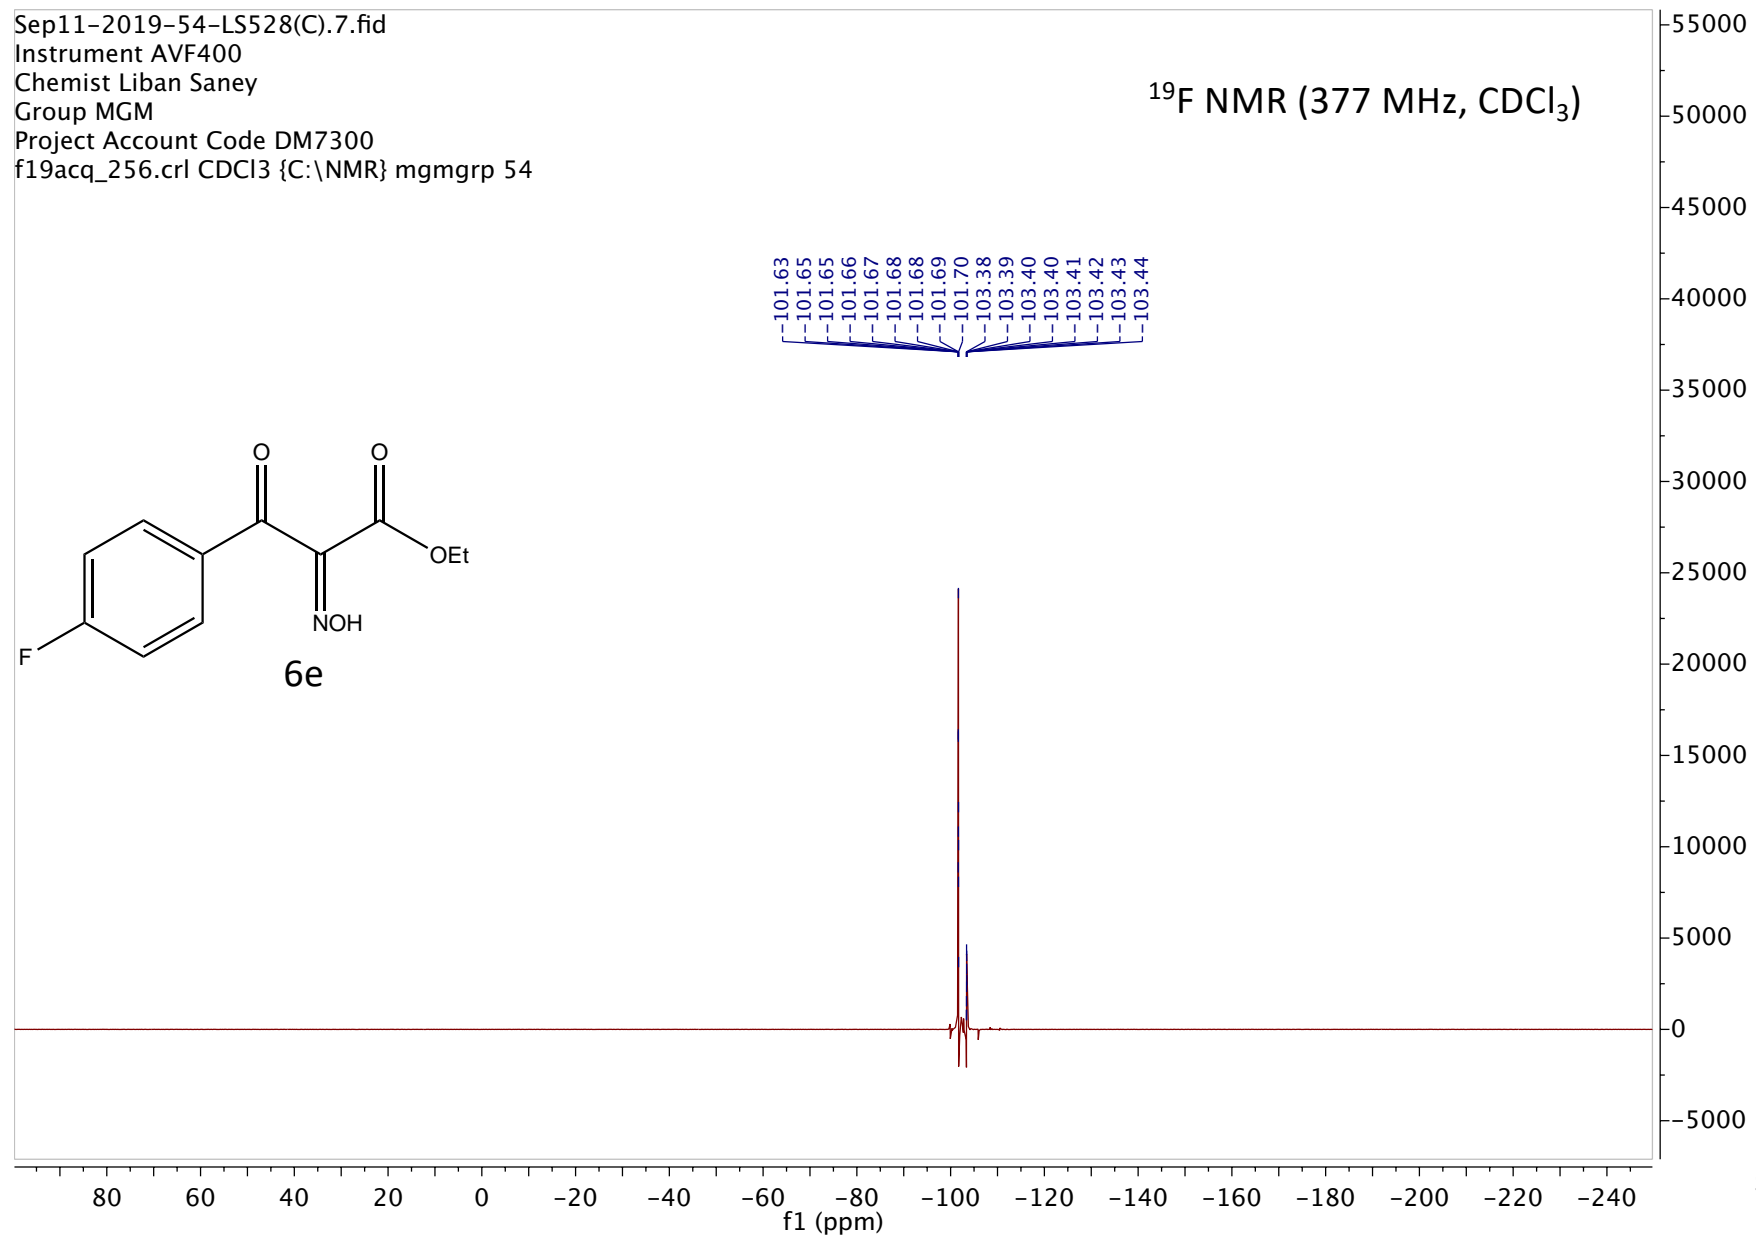

Sep11-2019-58-LS529(C).1.fid  
Instrument AVF400  
Chemist Liban Saney  
Group MGM  
Project Account Code DM7300  
h1acq.crl CDCl3 {C:\NMR} mgmgrp 58

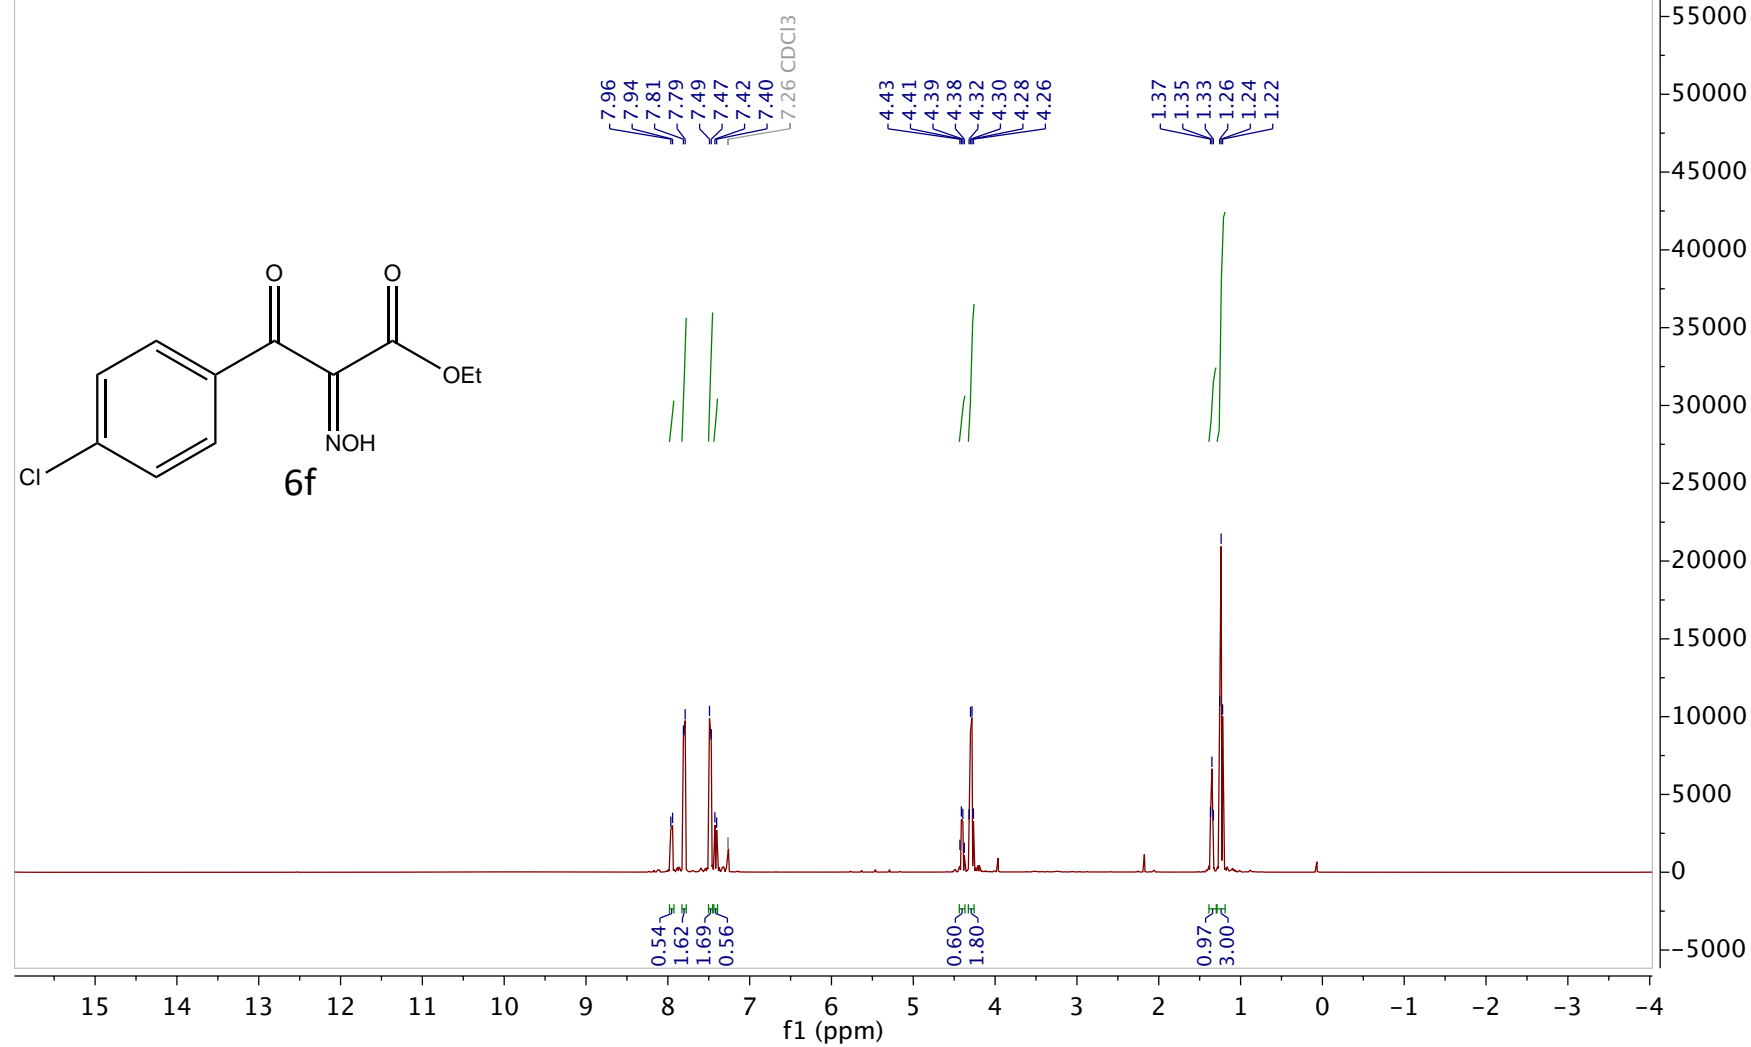

Sep11-2019-58-LS529(C).4.fid  
Instrument AVF400  
Chemist Liban Saney  
Group MGM  
Project Account Code DM7300  
c13acq\_512.crl CDCl3 {C:\NMR} mgmgrp 58

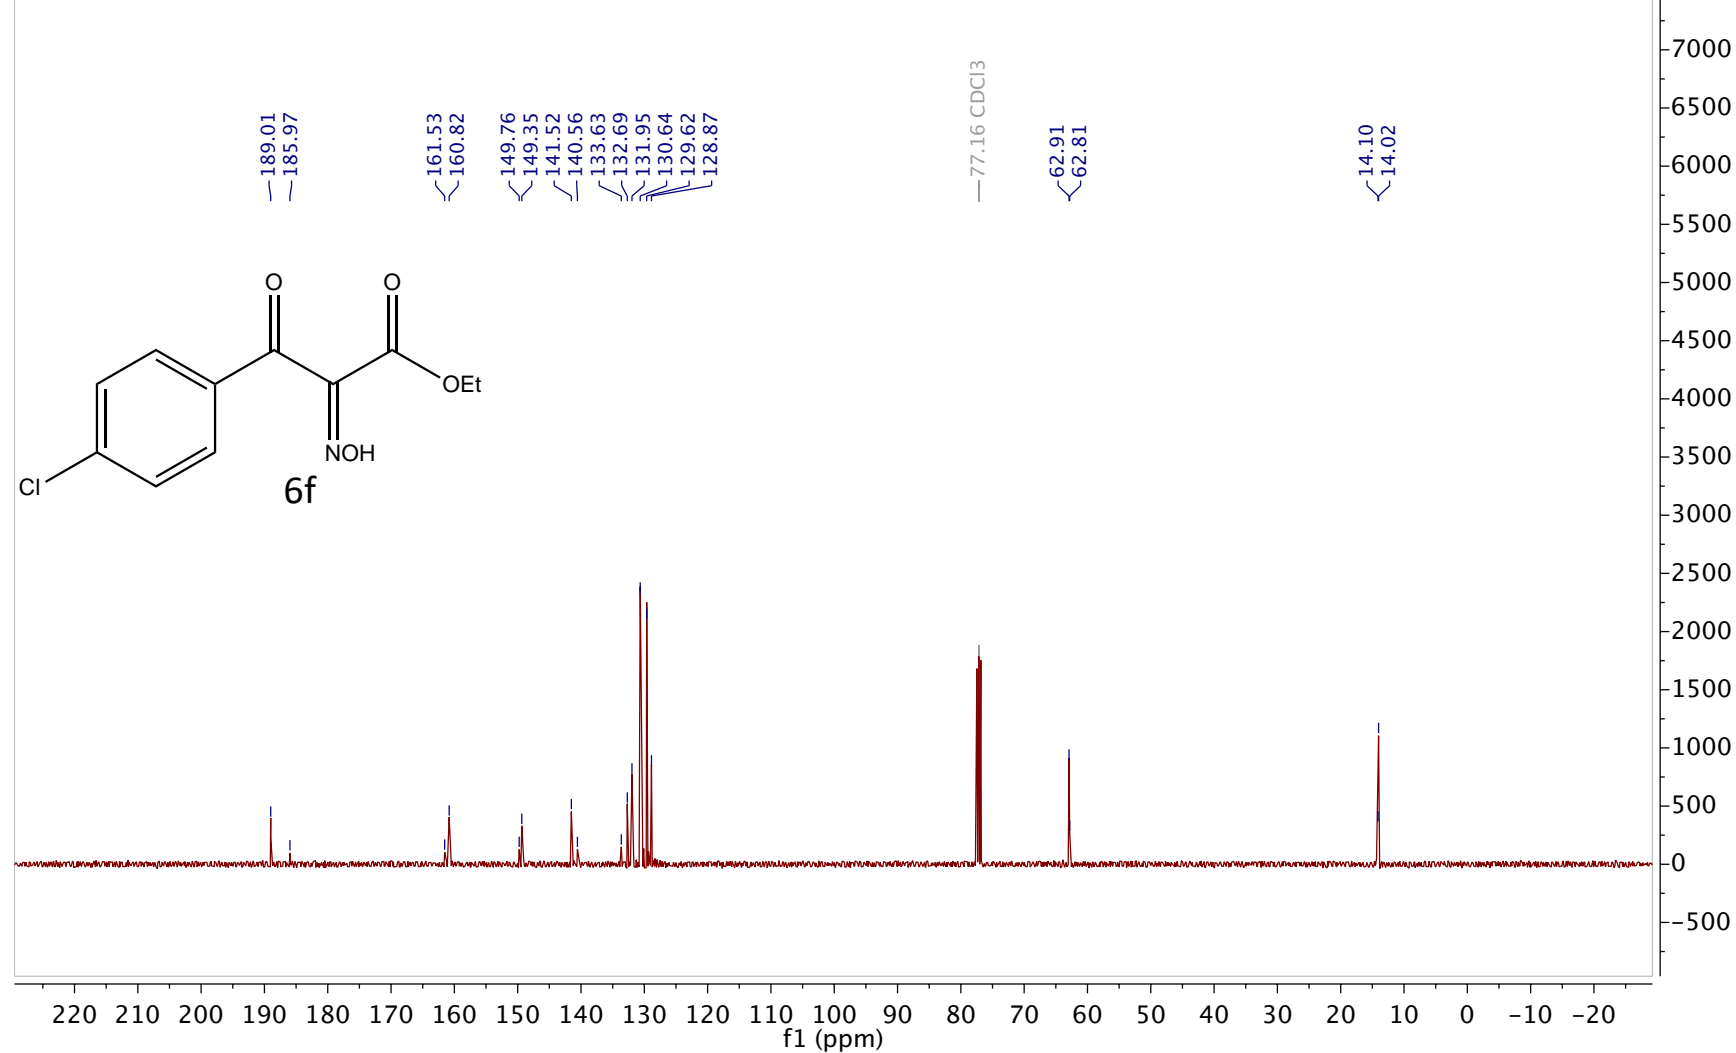



Aug28-2019-60-LS509(C).1.fid  
Instrument AVF400  
Chemist Liban Saney  
Group MGM  
Project Account Code DM7300  
h1acq.crl CDCl3 {C:\NMR} mgmgrp 60

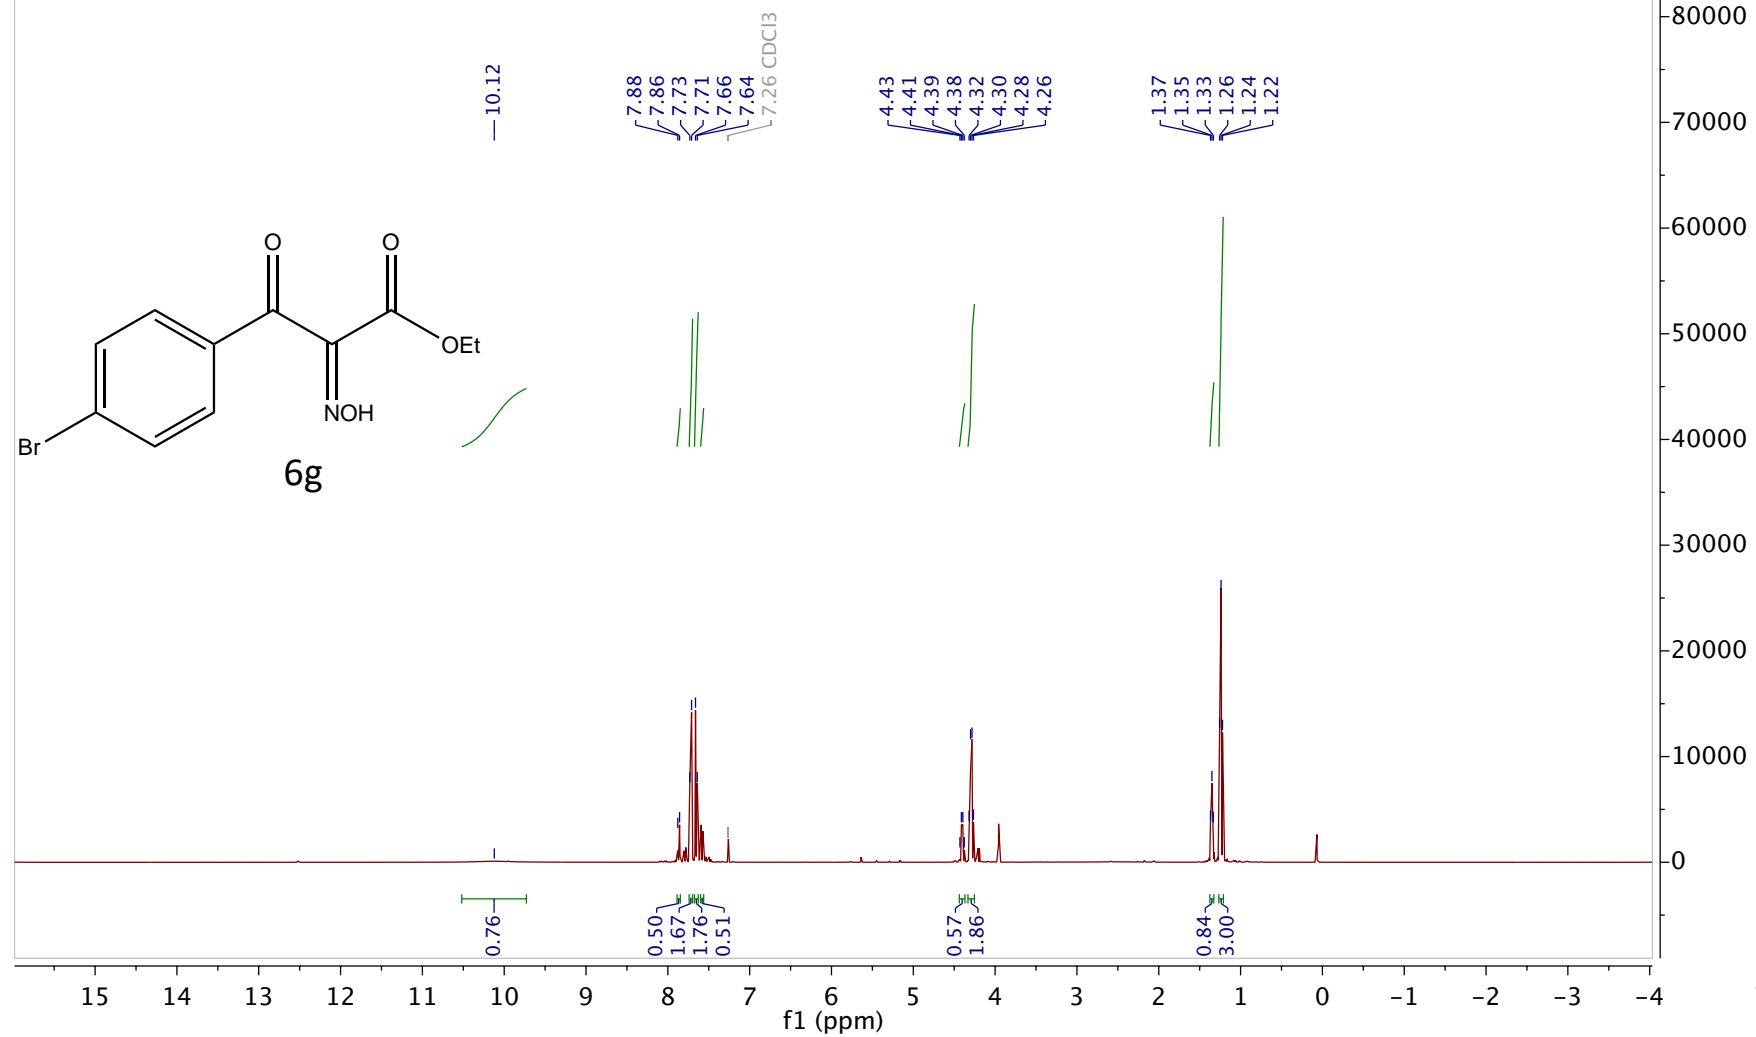

Aug28-2019-60-LS509(C).4.fid  
Instrument AVF400  
Chemist Liban Saney  
Group MGM  
Project Account Code DM7300  
c13acq\_512.crl CDCl3 {C:\NMR} mgmgrp 60

<sup>13</sup>C NMR (101 MHz, CDCl<sub>3</sub>)

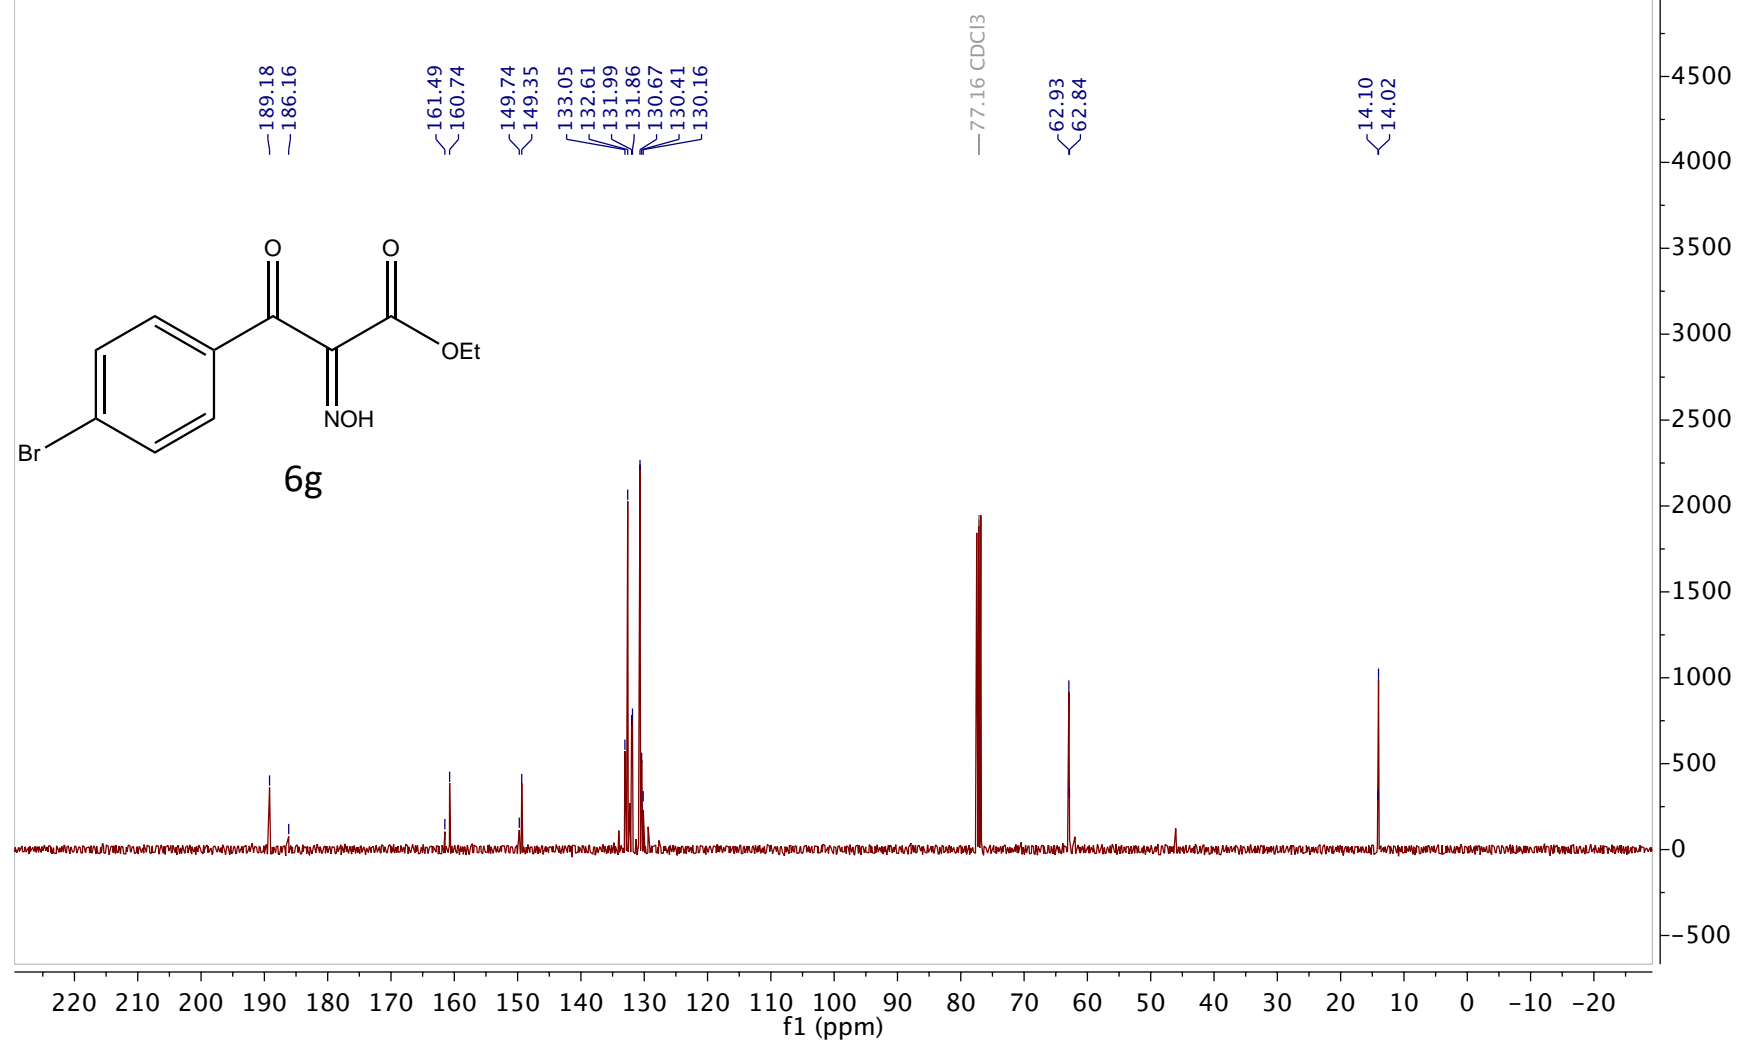

Mar23-2019-60-LS340(C).1.fid  
Instrument AVF400  
Chemist Liban Saney  
Group MGM  
Project Account Code DM7300  
h1acq.crl D2O {C:\NMR} mgmgrp 60

$^1\text{H}$  NMR (400 MHz,  $\text{D}_2\text{O}$ )

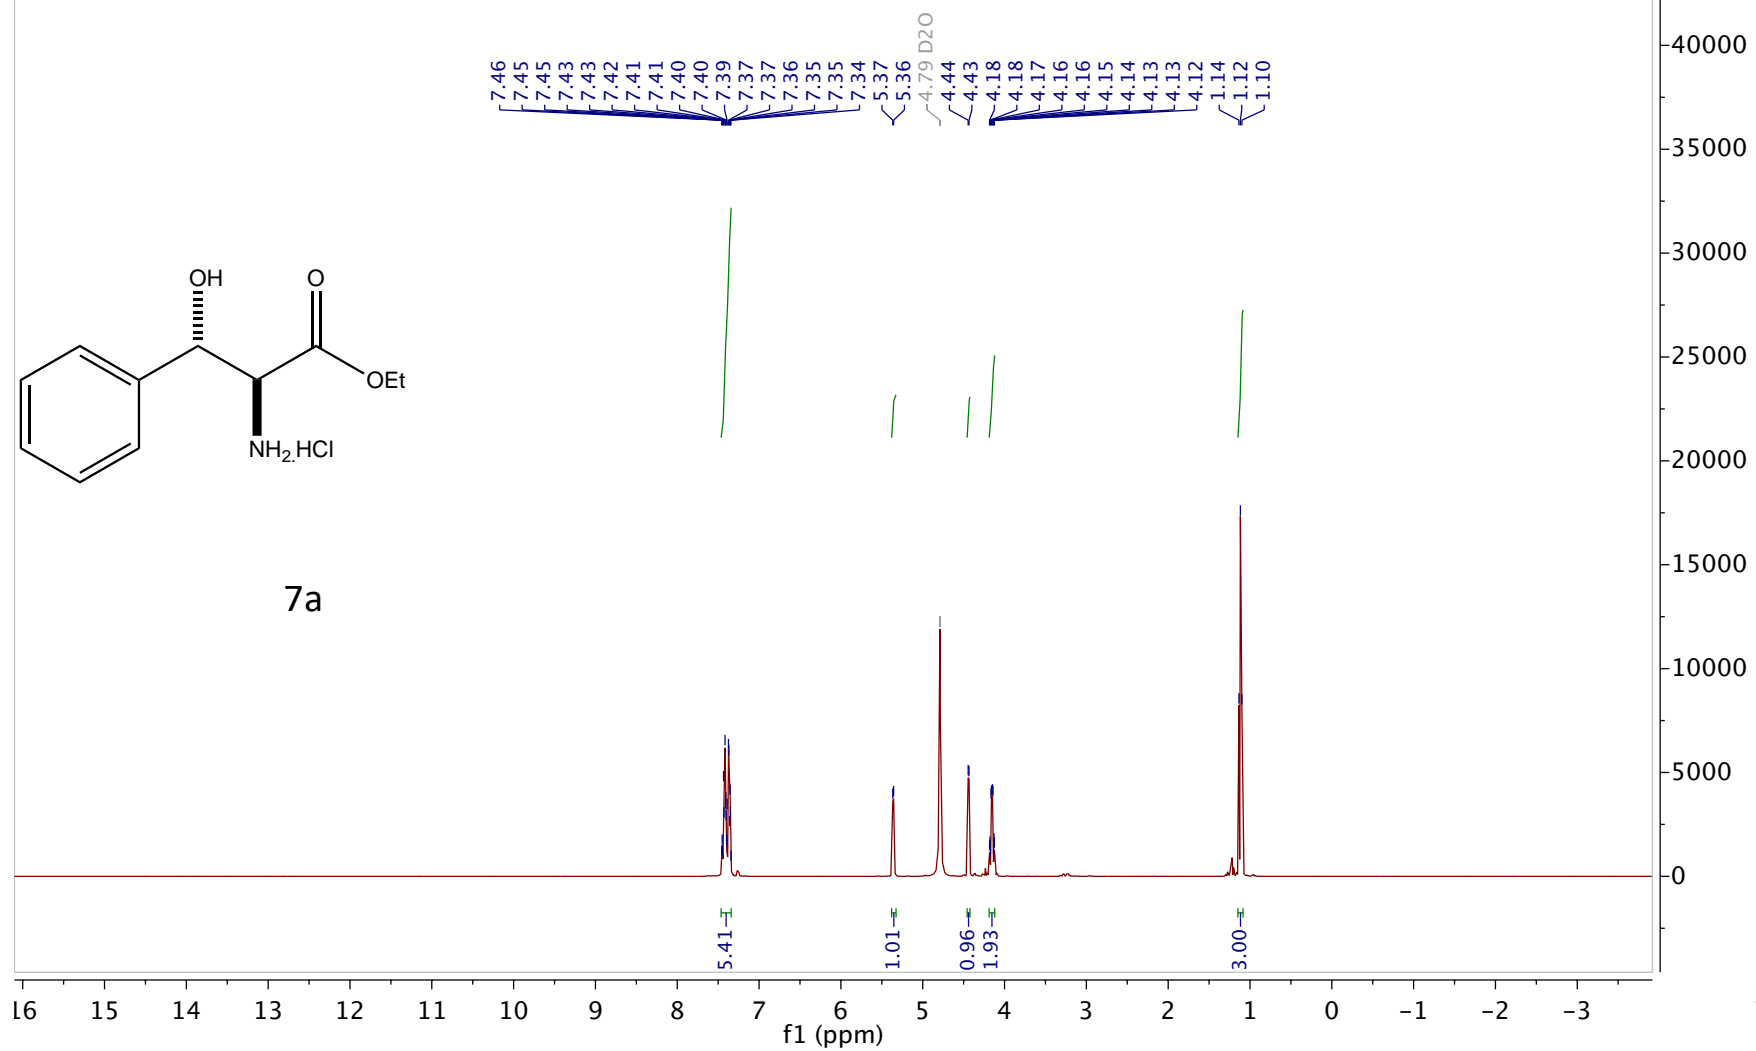

Mar23-2019-60-LS340(C).4.fid  
Instrument AVF400  
Chemist Liban Saney  
Group MGM  
Project Account Code DM7300  
c13acq\_512.crl D2O {C:\NMR} mgmgrp 60

$^{13}\text{C}$  NMR (101 MHz,  $\text{D}_2\text{O}$ )

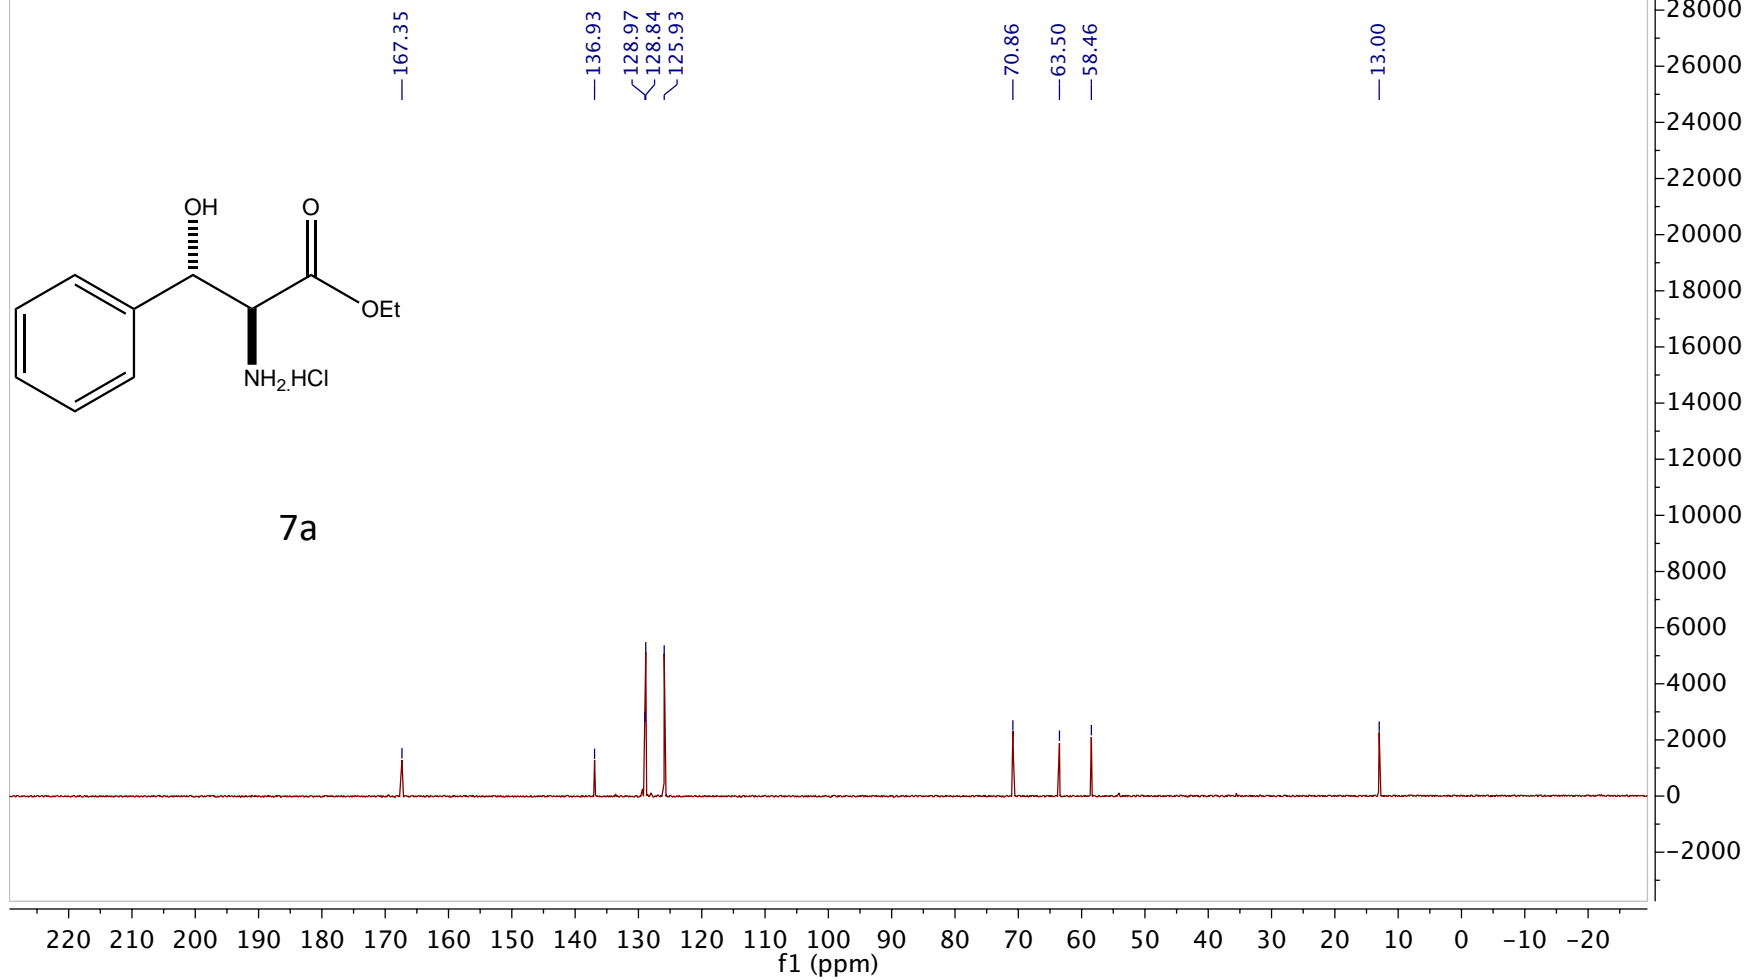

Aug22-2019-59-LS497(C).1.fid  
Instrument AVF400  
Chemist Liban Saney  
Group MGM  
Project Account Code DM7300  
h1acq.crl D2O {C:\NMR} mgmgrp 59

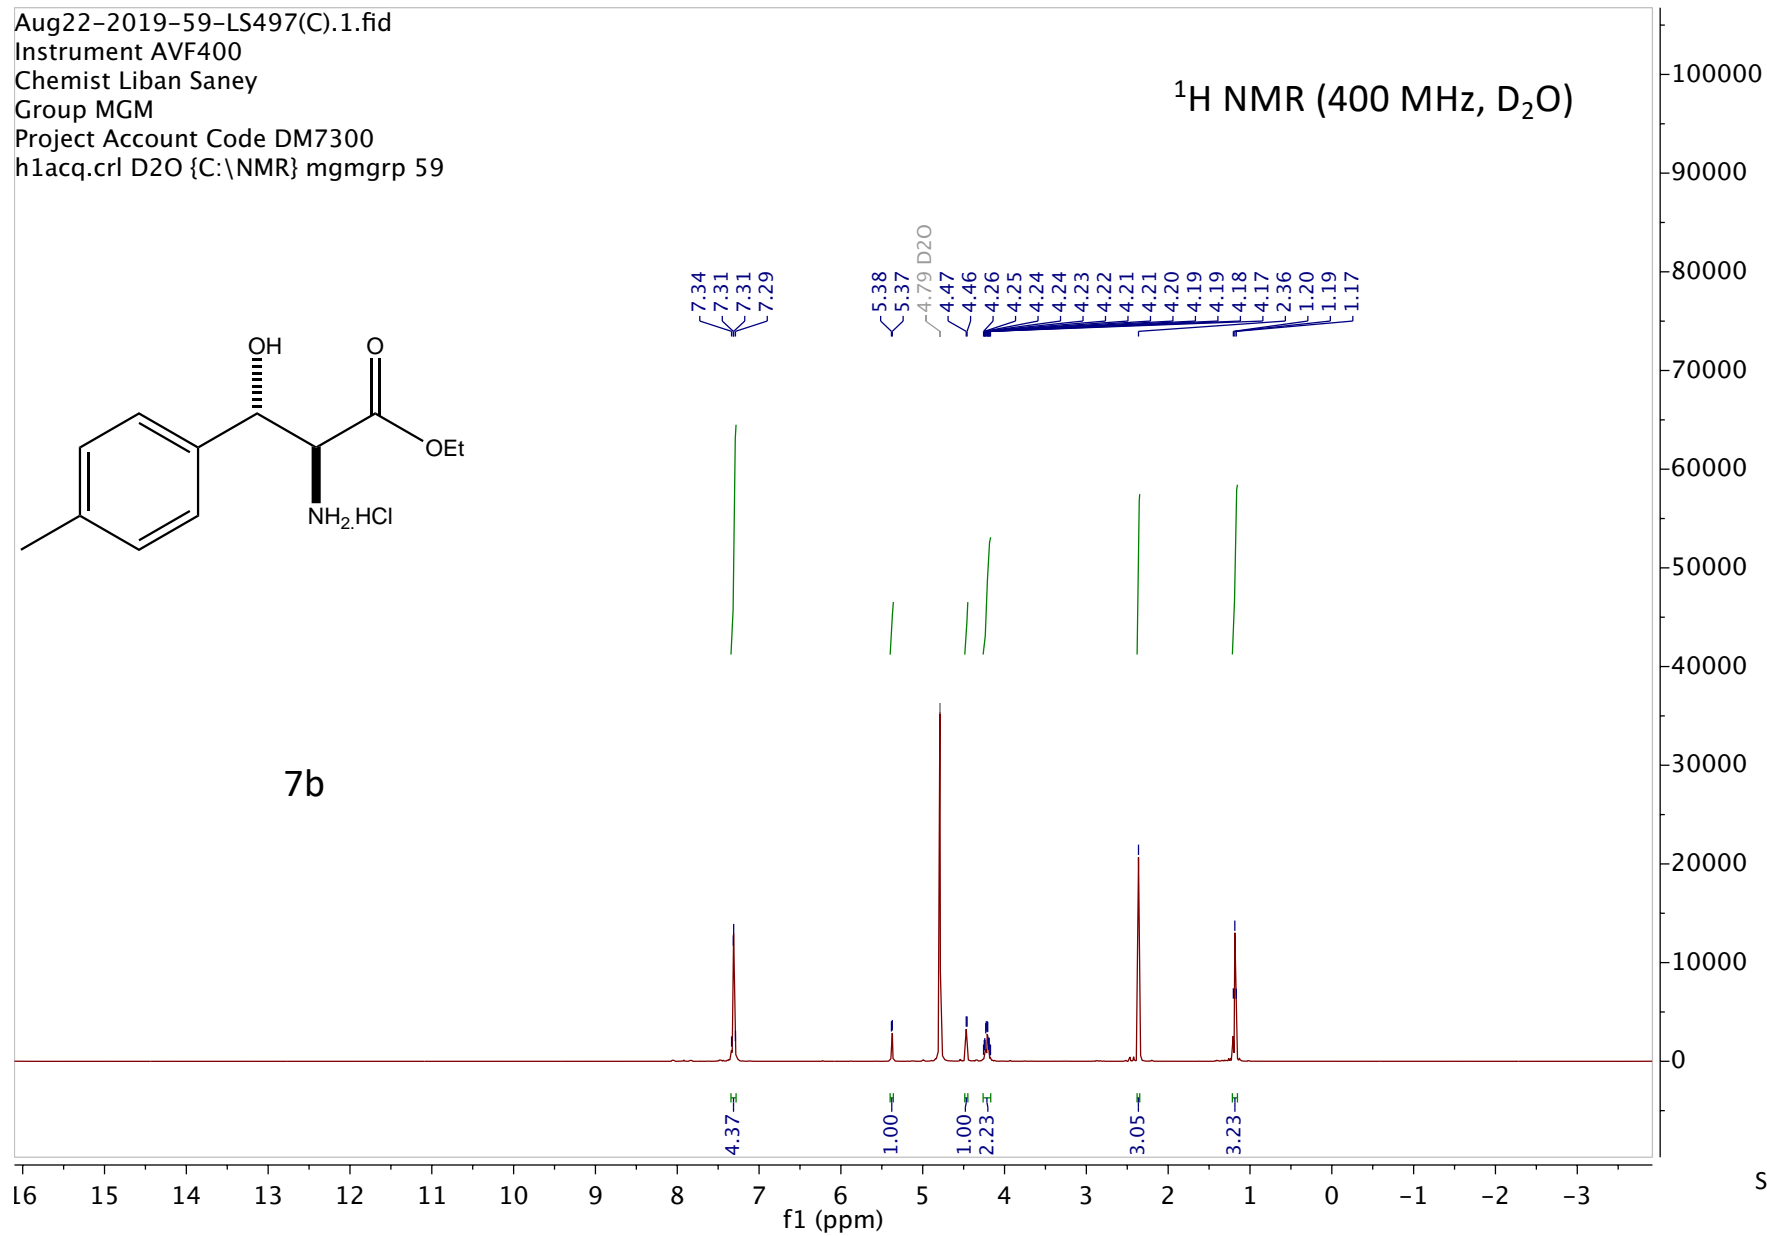

Aug22-2019-59-LS497(C).4.fid  
Instrument AVF400  
Chemist Liban Saney  
Group MGM  
Project Account Code DM7300  
c13acq\_512.crl D2O {C:\NMR} mgmgrp 59

<sup>13</sup>C NMR (101 MHz, D<sub>2</sub>O)

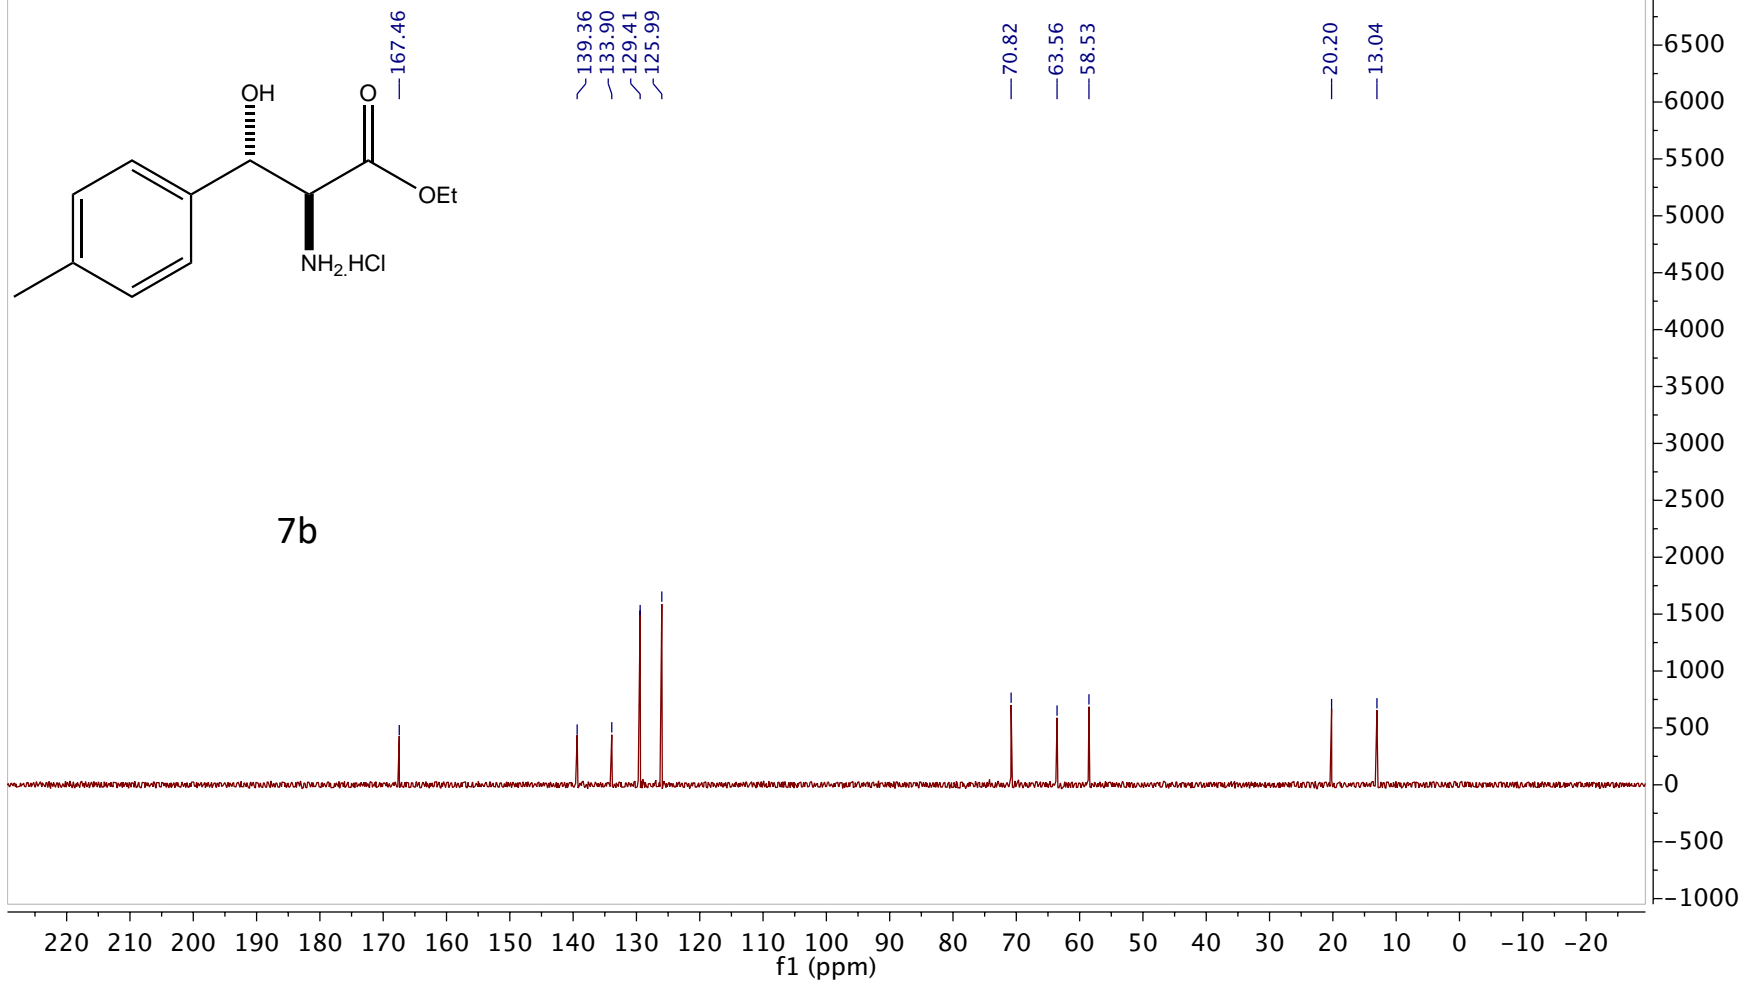

Aug31-2019-60-LS512(C).1.fid  
Instrument AVF400  
Chemist Liban Saney  
Group MGM  
Project Account Code DM7300  
h1acq.crl MeOD {C:\NMR} mgmgrp 60

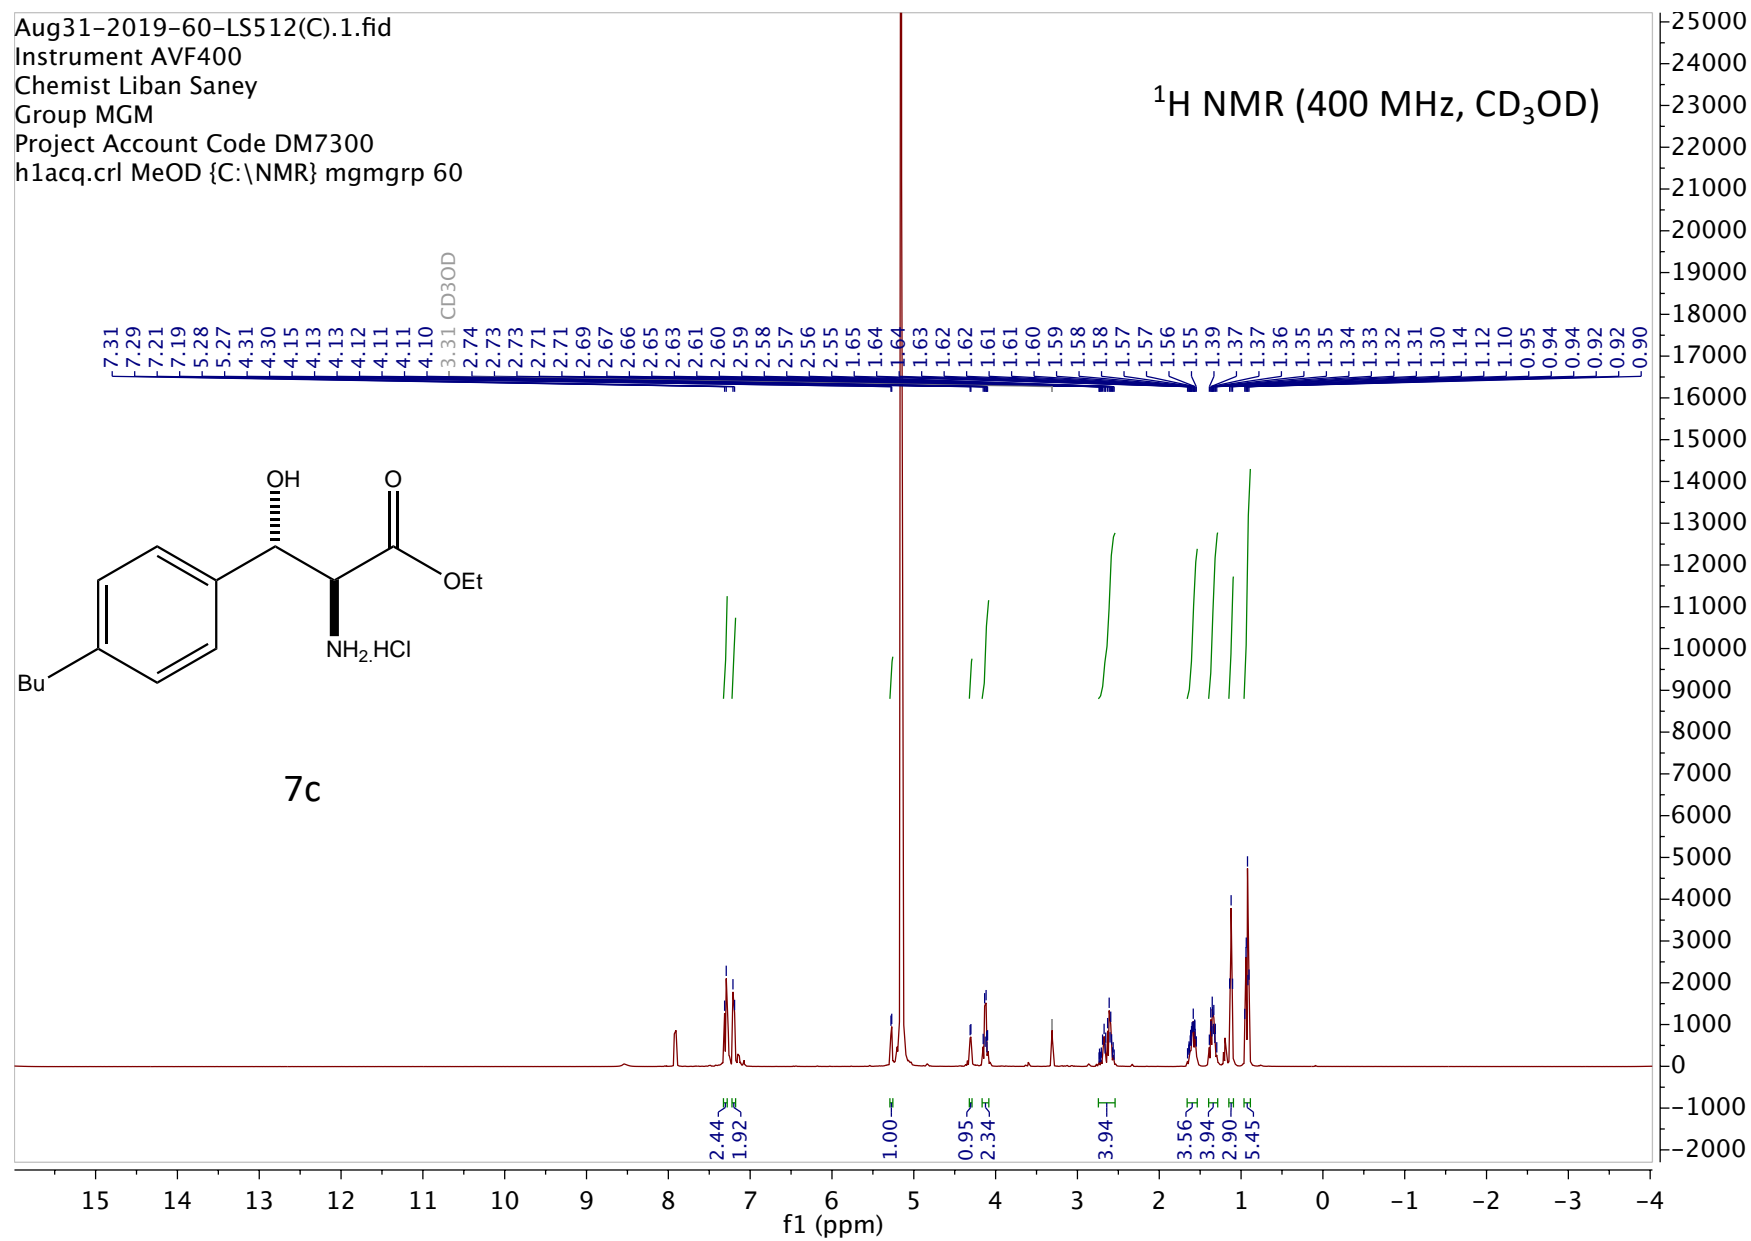

Aug31-2019-60-LS512(C).4.fid  
Instrument AVF400  
Chemist Liban Saney  
Group MGM  
Project Account Code DM7300  
c13acq\_512.crl MeOD {C:\NMR} mgmgrp 60

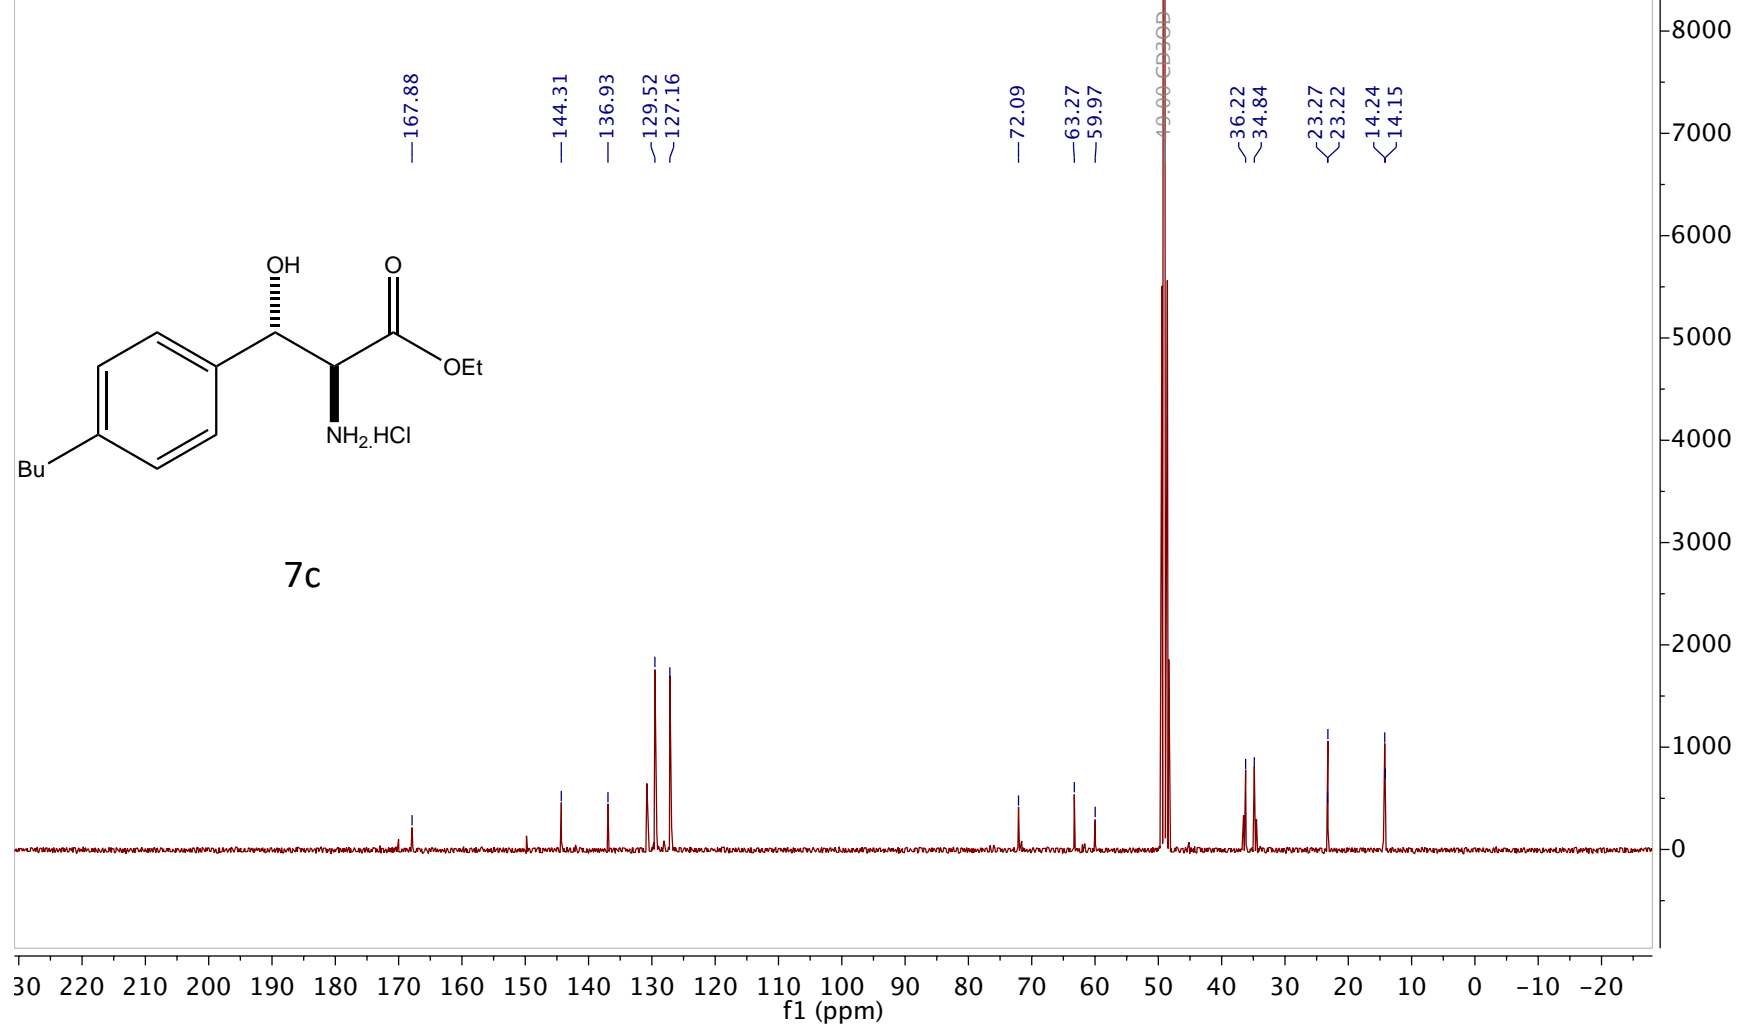



Aug28-2019-56-LS508(C).1.fid  
Instrument AVF400  
Chemist Liban Saney  
Group MGM  
Project Account Code DM7300  
h1acq.crl D2O {C:\NMR} mgmgrp 56

<sup>1</sup>H NMR (400 MHz, D<sub>2</sub>O)

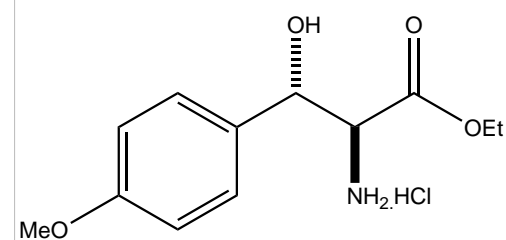

7d

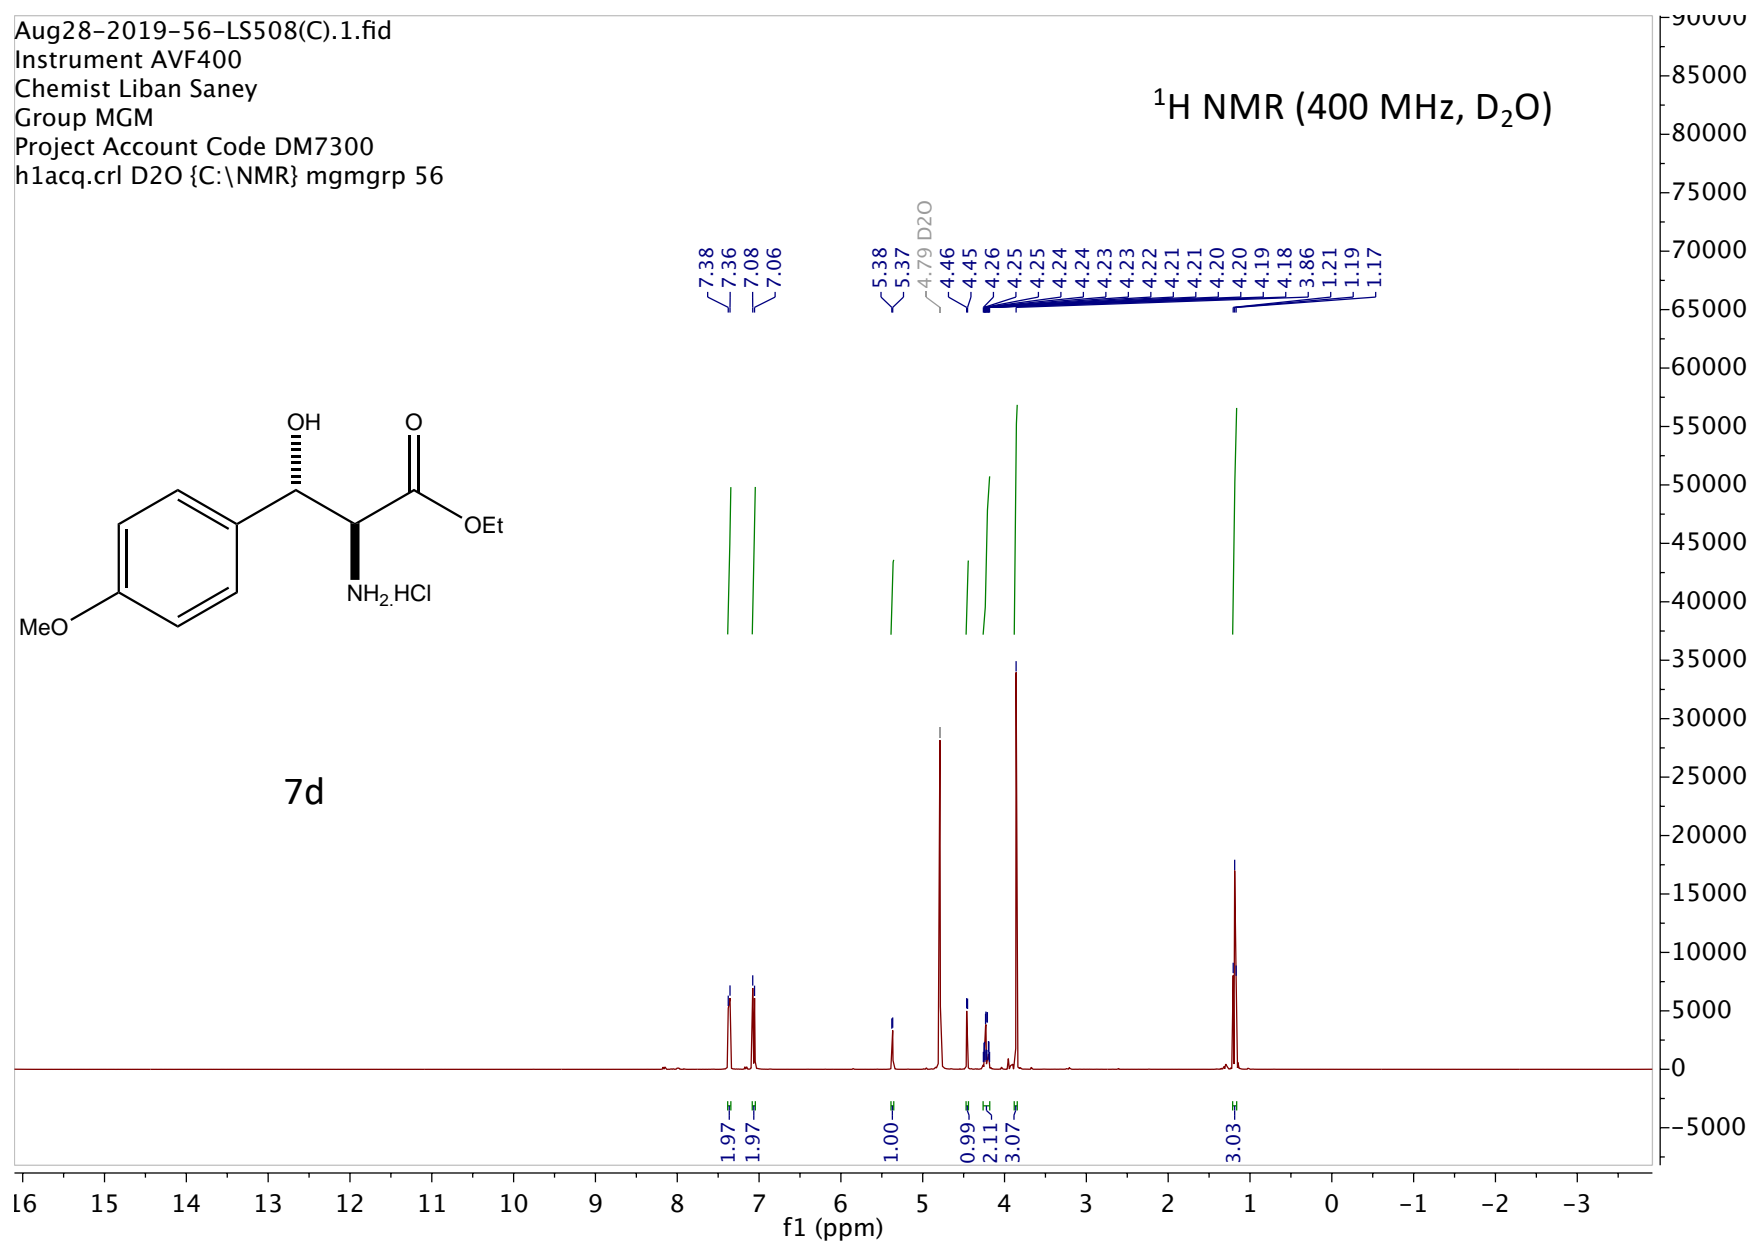

Aug28-2019-56-LS508(C).4.fid  
Instrument AVF400  
Chemist Liban Saney  
Group MGM  
Project Account Code DM7300  
c13acq\_512.crl D2O {C:\NMR} mgmgrp 56

<sup>13</sup>C NMR (101 MHz, D<sub>2</sub>O)

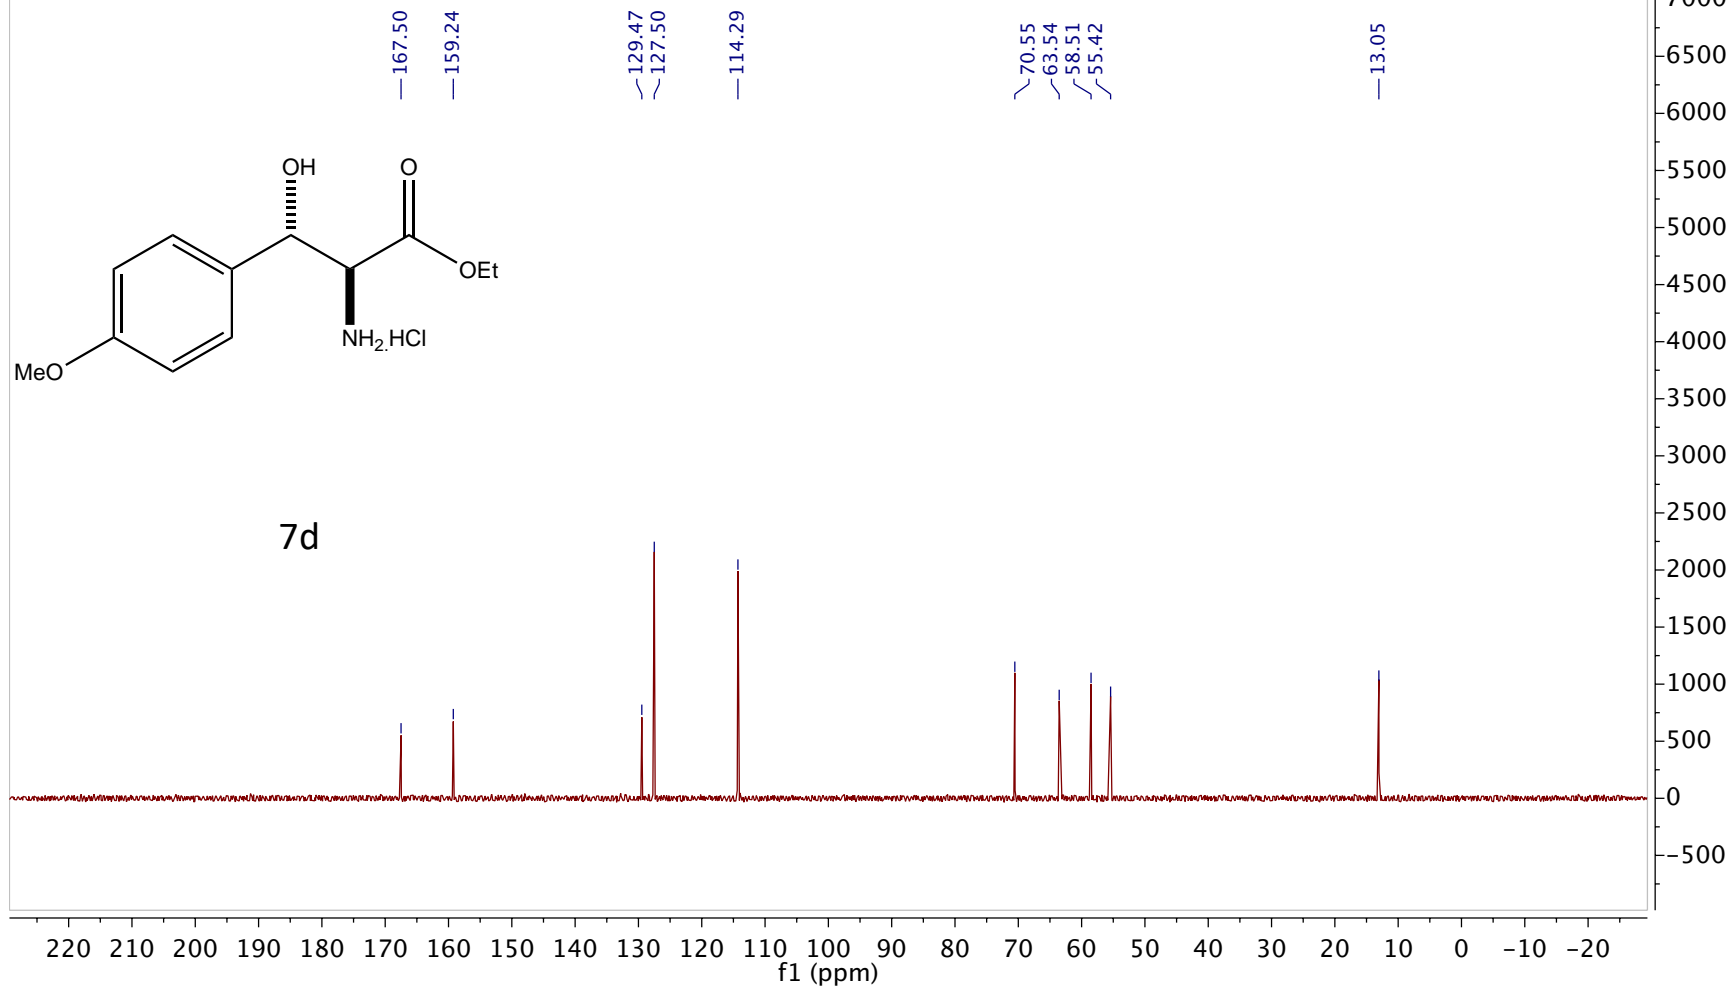

Jul13-2020-1-LS686(C).1.fid  
Instrument AVH400  
Group MGM  
Chemist Liban Saney  
Project Account Code DM7300  
h1acq.crl D2O {C:\NMR} mgmgrp 1

<sup>1</sup>H NMR (400 MHz, D<sub>2</sub>O)

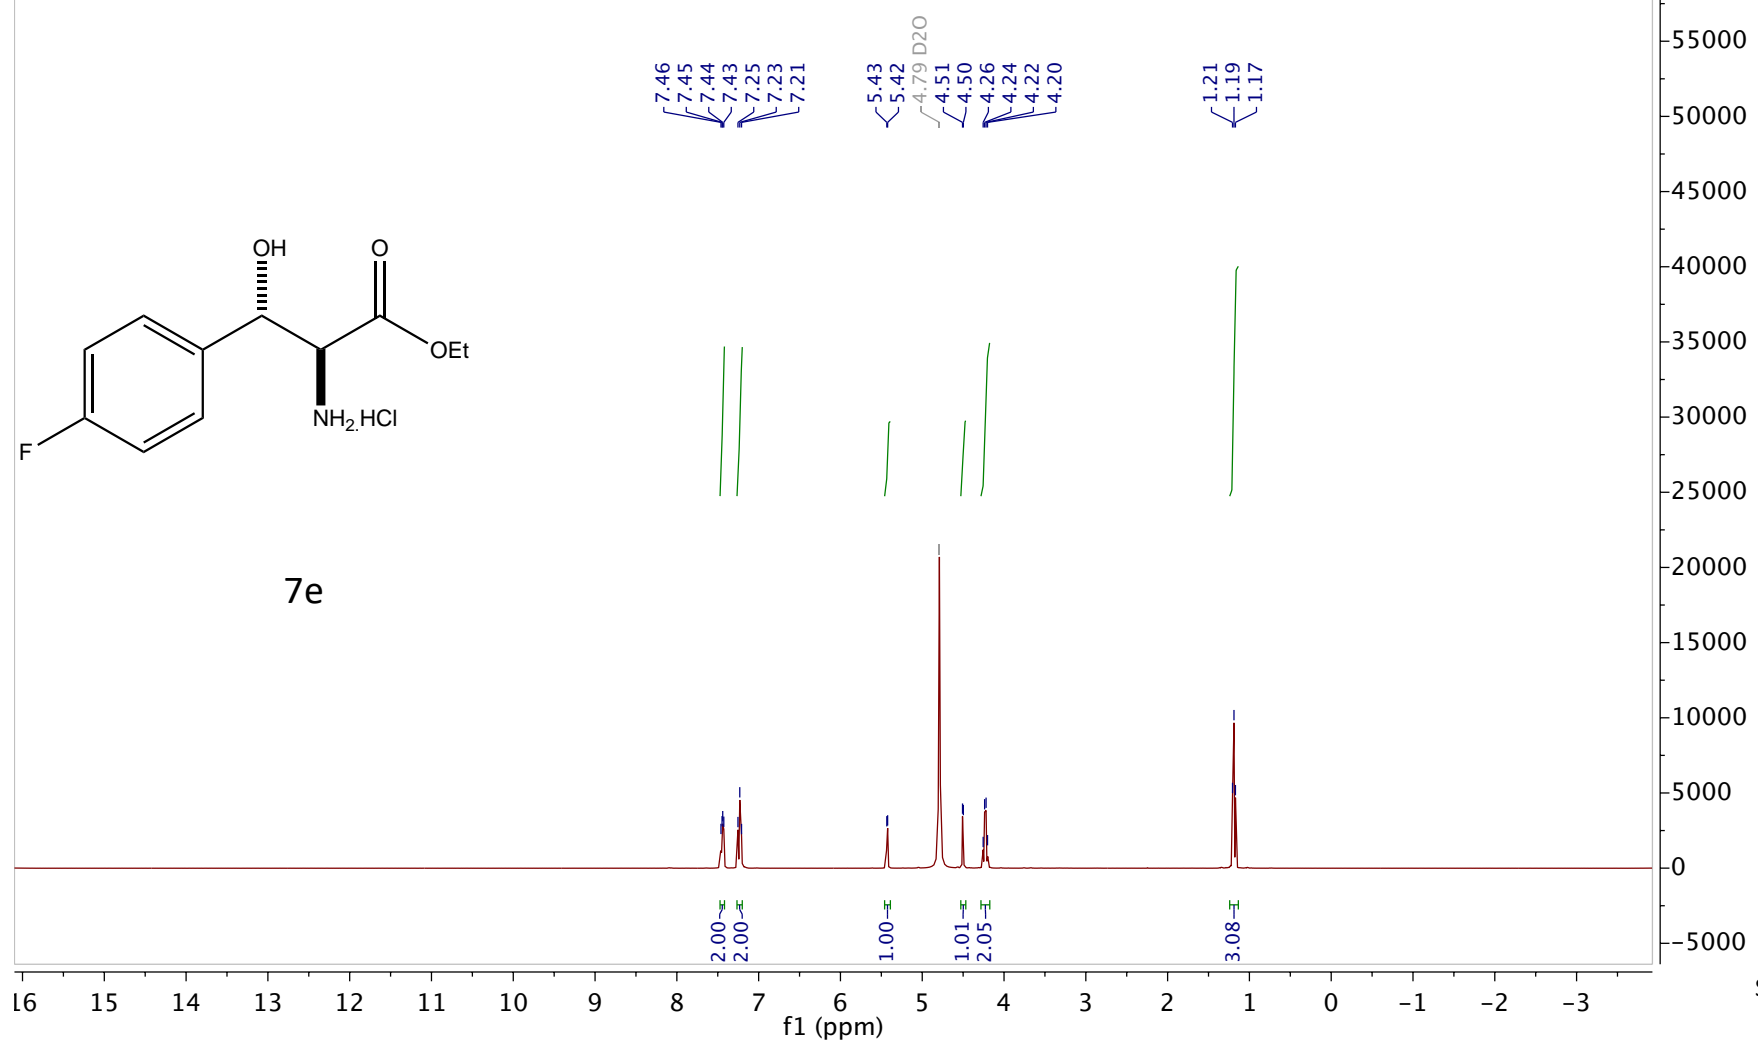

Jul13-2020-1-LS686(C).4.fid  
Instrument AVH400  
Group MGM  
Chemist Liban Saney  
Project Account Code DM7300  
c13acq\_512.crl D2O {C:\NMR} mgmgrp 1

<sup>13</sup>C NMR (101 MHz, D<sub>2</sub>O)

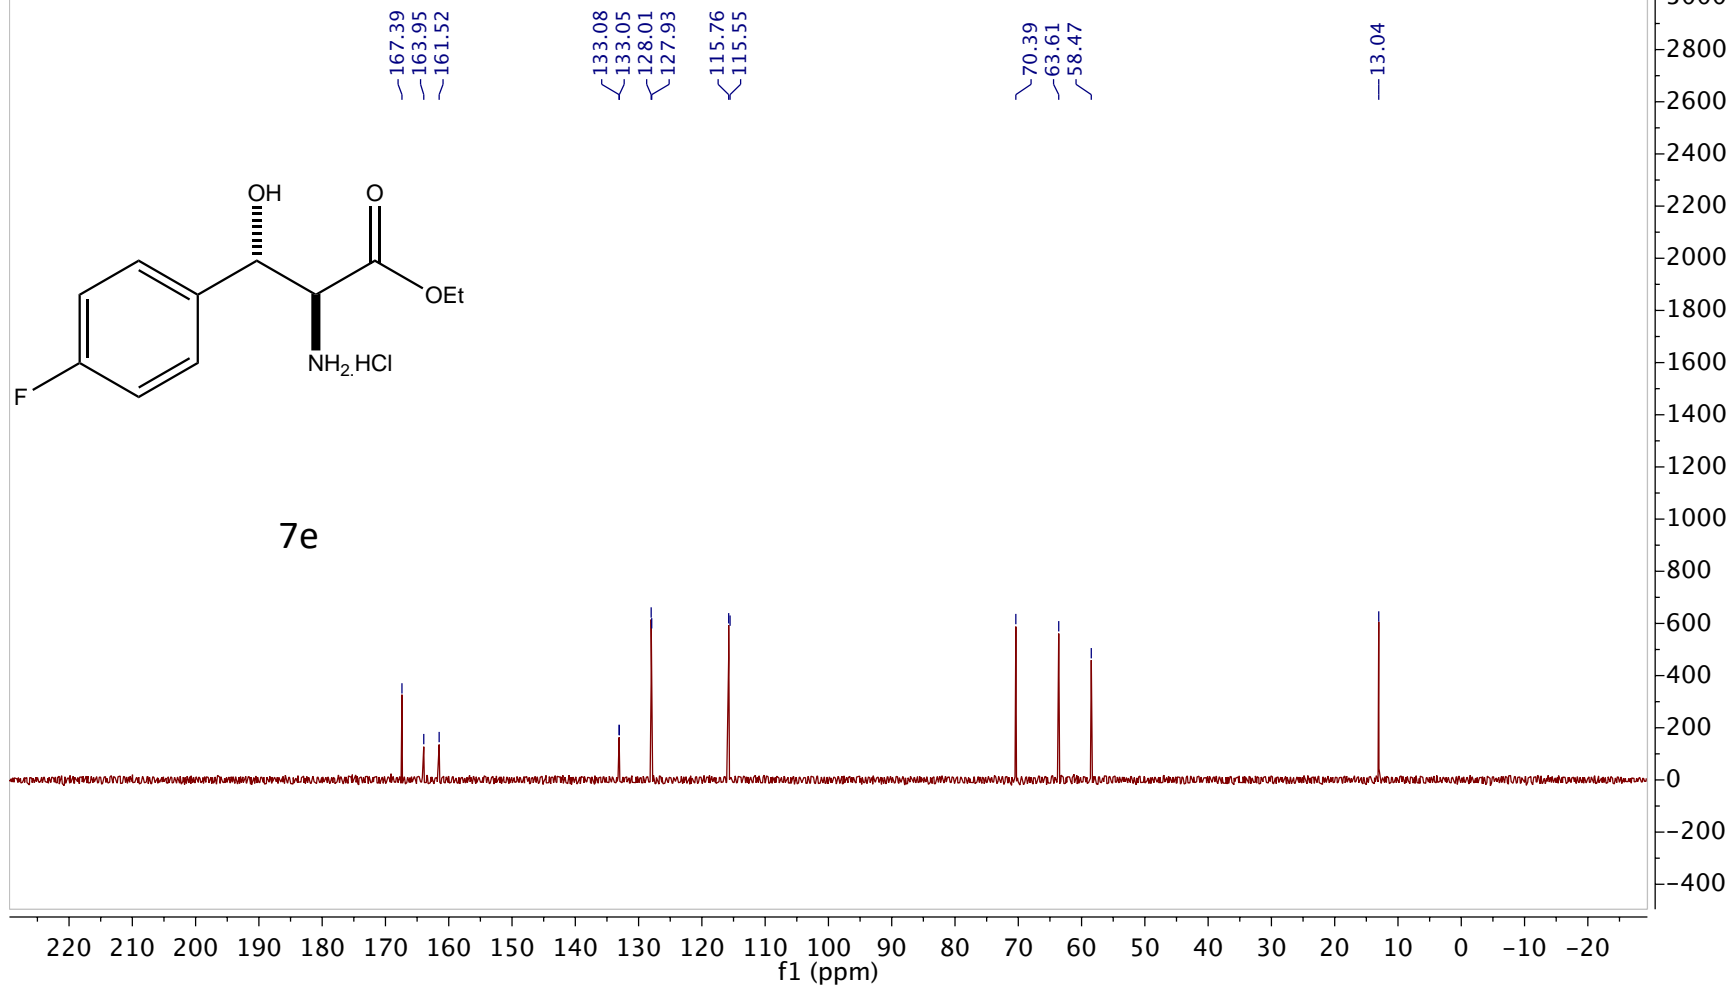

Jul13-2020-1-LS686(C).7.fid  
Instrument AVH400  
Group MGM  
Chemist Liban Saney  
Project Account Code DM7300  
f19dec.crl D2O {C:\NMR} mgmgrp 1

$^{19}\text{F}$  NMR (377 MHz,  $\text{D}_2\text{O}$ )

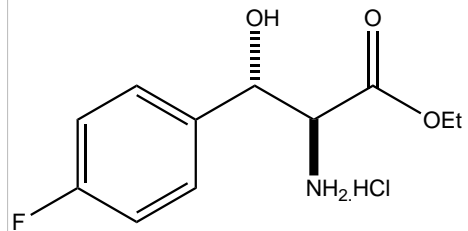

7e

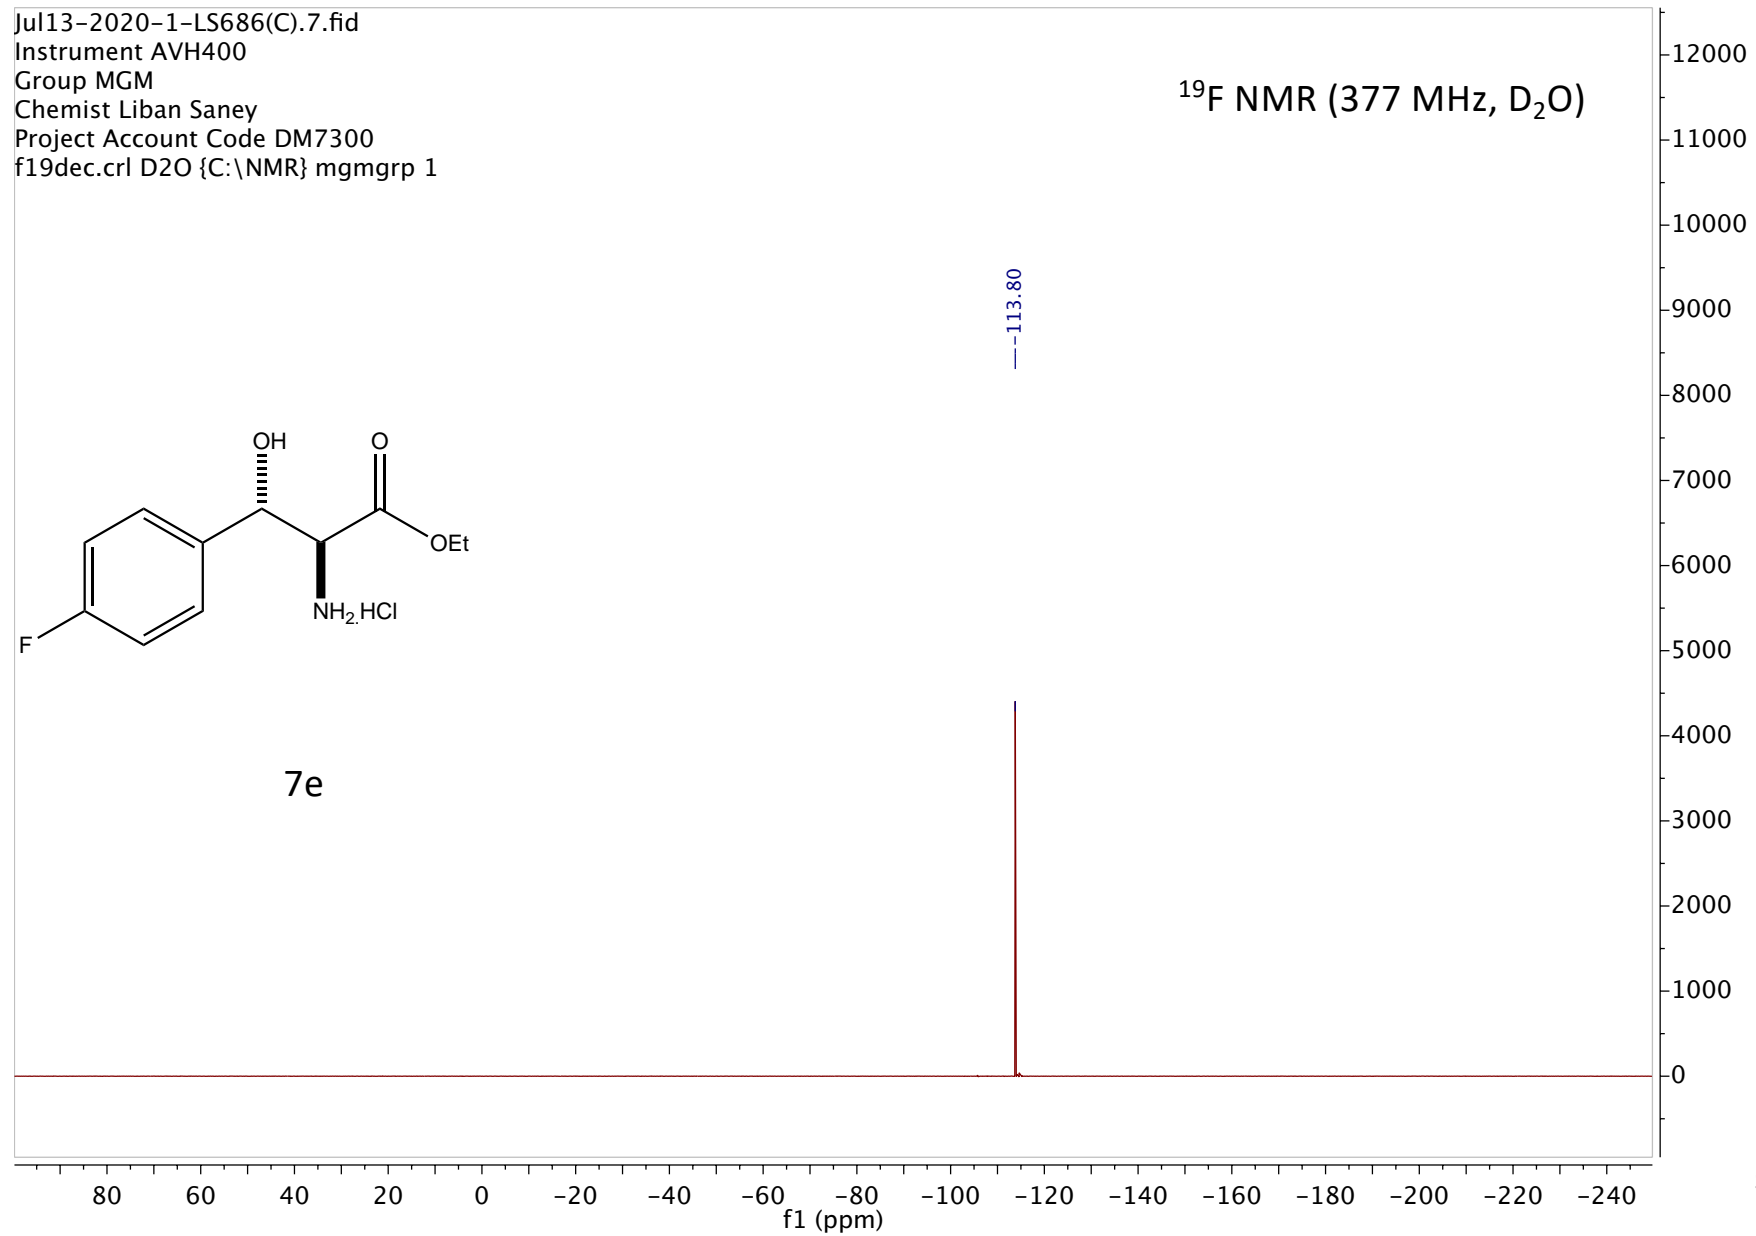

Sep13-2019-59-LS532(C).1.fid  
Instrument AVF400  
Chemist Liban Saney  
Group MGM  
Project Account Code DM7300  
h1acq.crl D2O {C:\NMR} mgmgrp 59

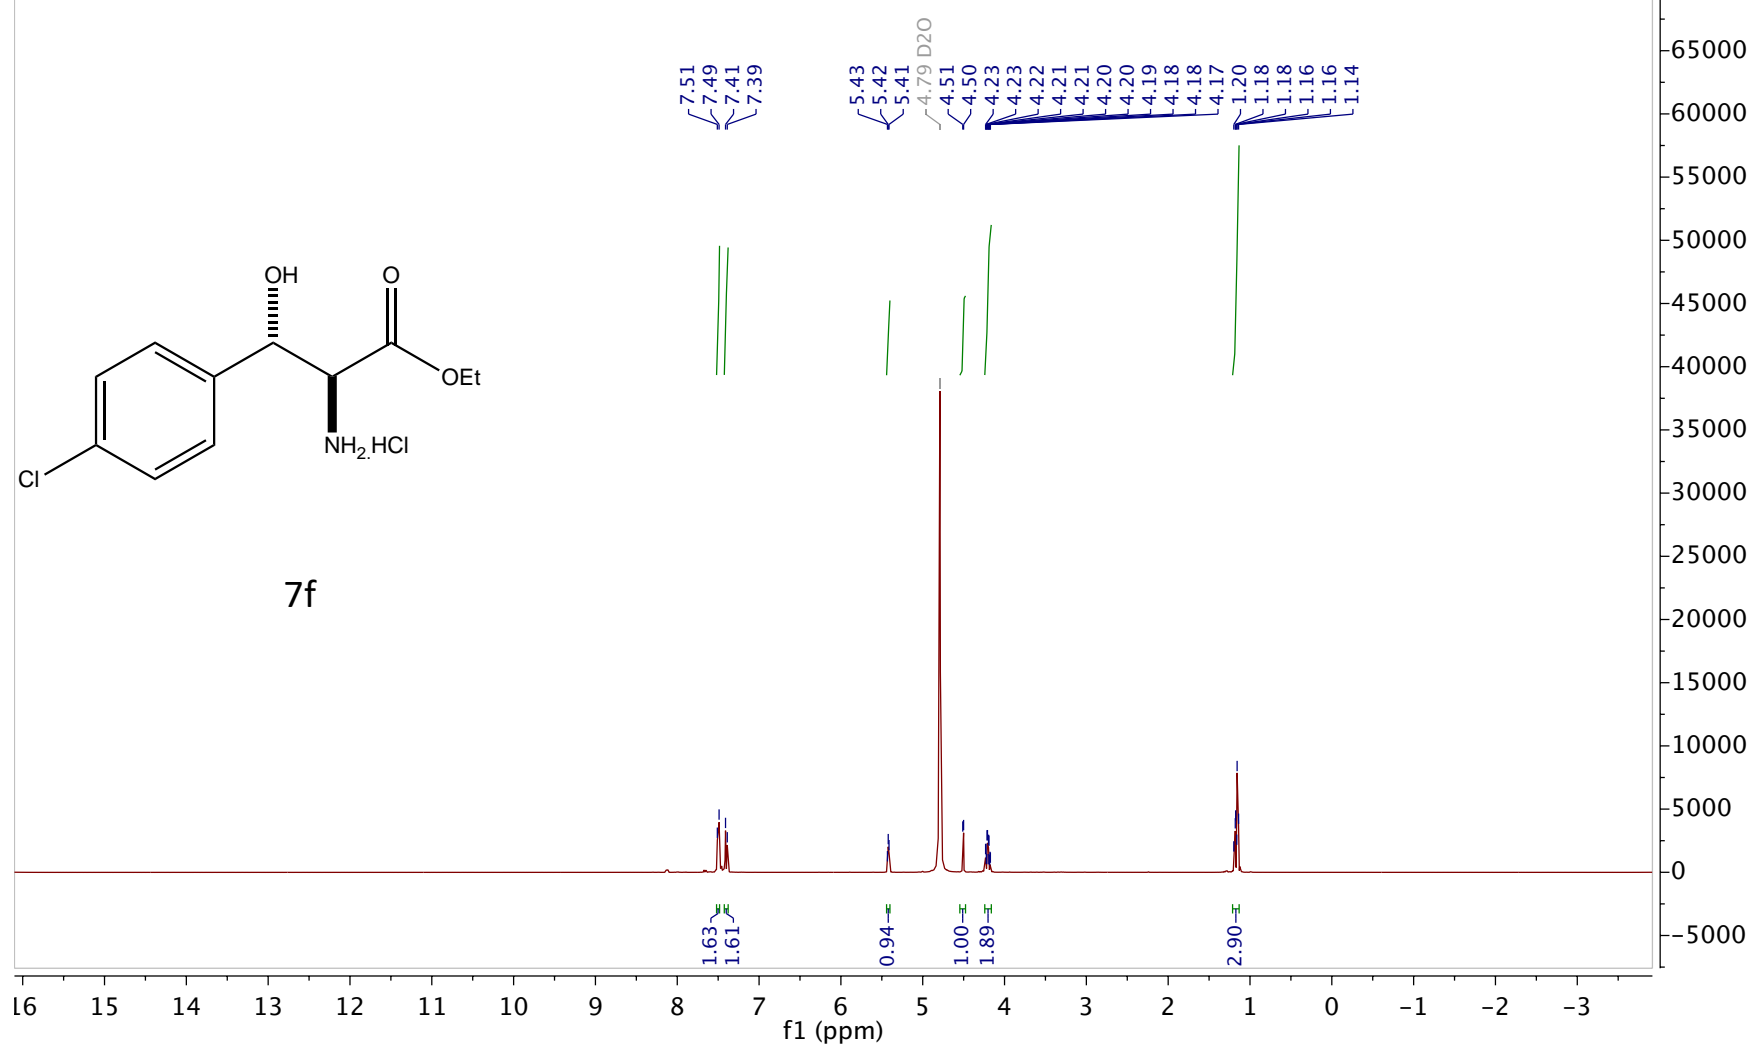

Sep13-2019-59-LS532(C).4.fid  
Instrument AVF400  
Chemist Liban Saney  
Group MGM  
Project Account Code DM7300  
c13acq\_512.crl D2O {C:\NMR} mgmgrp 59

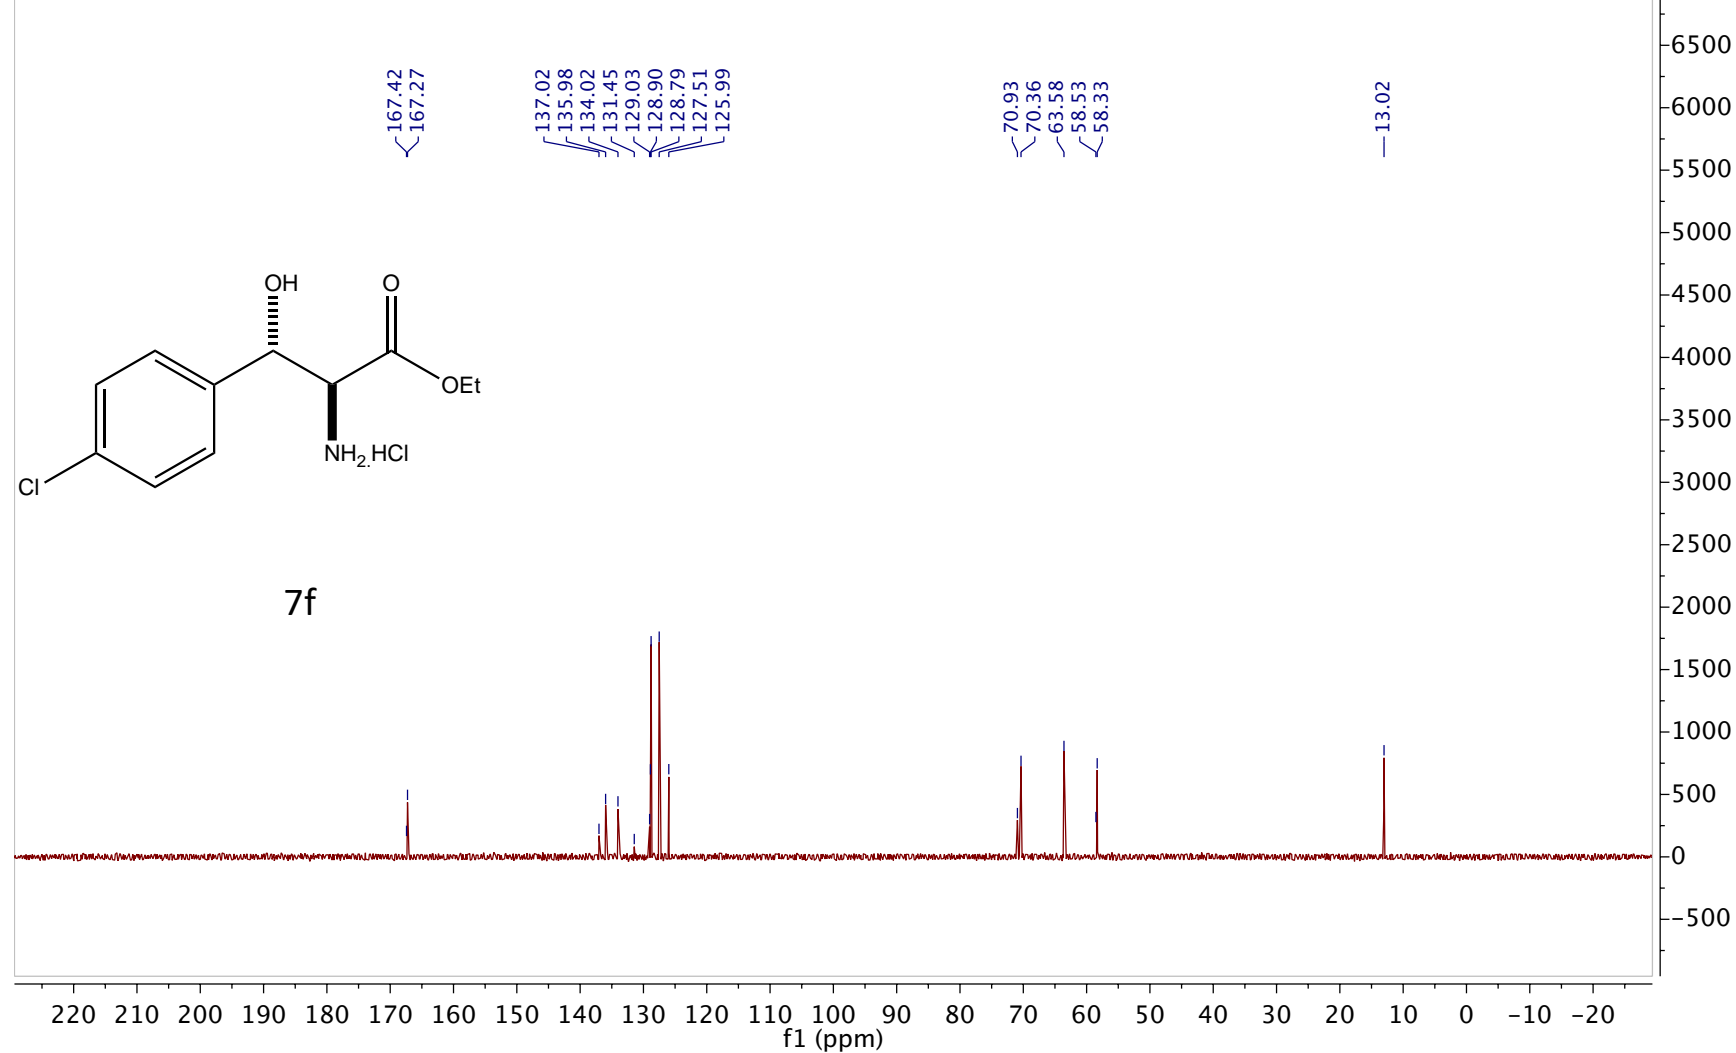

Apr13-2019-59-LS378(C).1.fid  
Instrument AVF400  
Chemist Liban Saney  
Group MGM  
Project Account Code DM7300  
h1acq.crl CDCl3 {C:\NMR} mgmgrp 59

<sup>1</sup>H NMR (400 MHz, CDCl<sub>3</sub>)

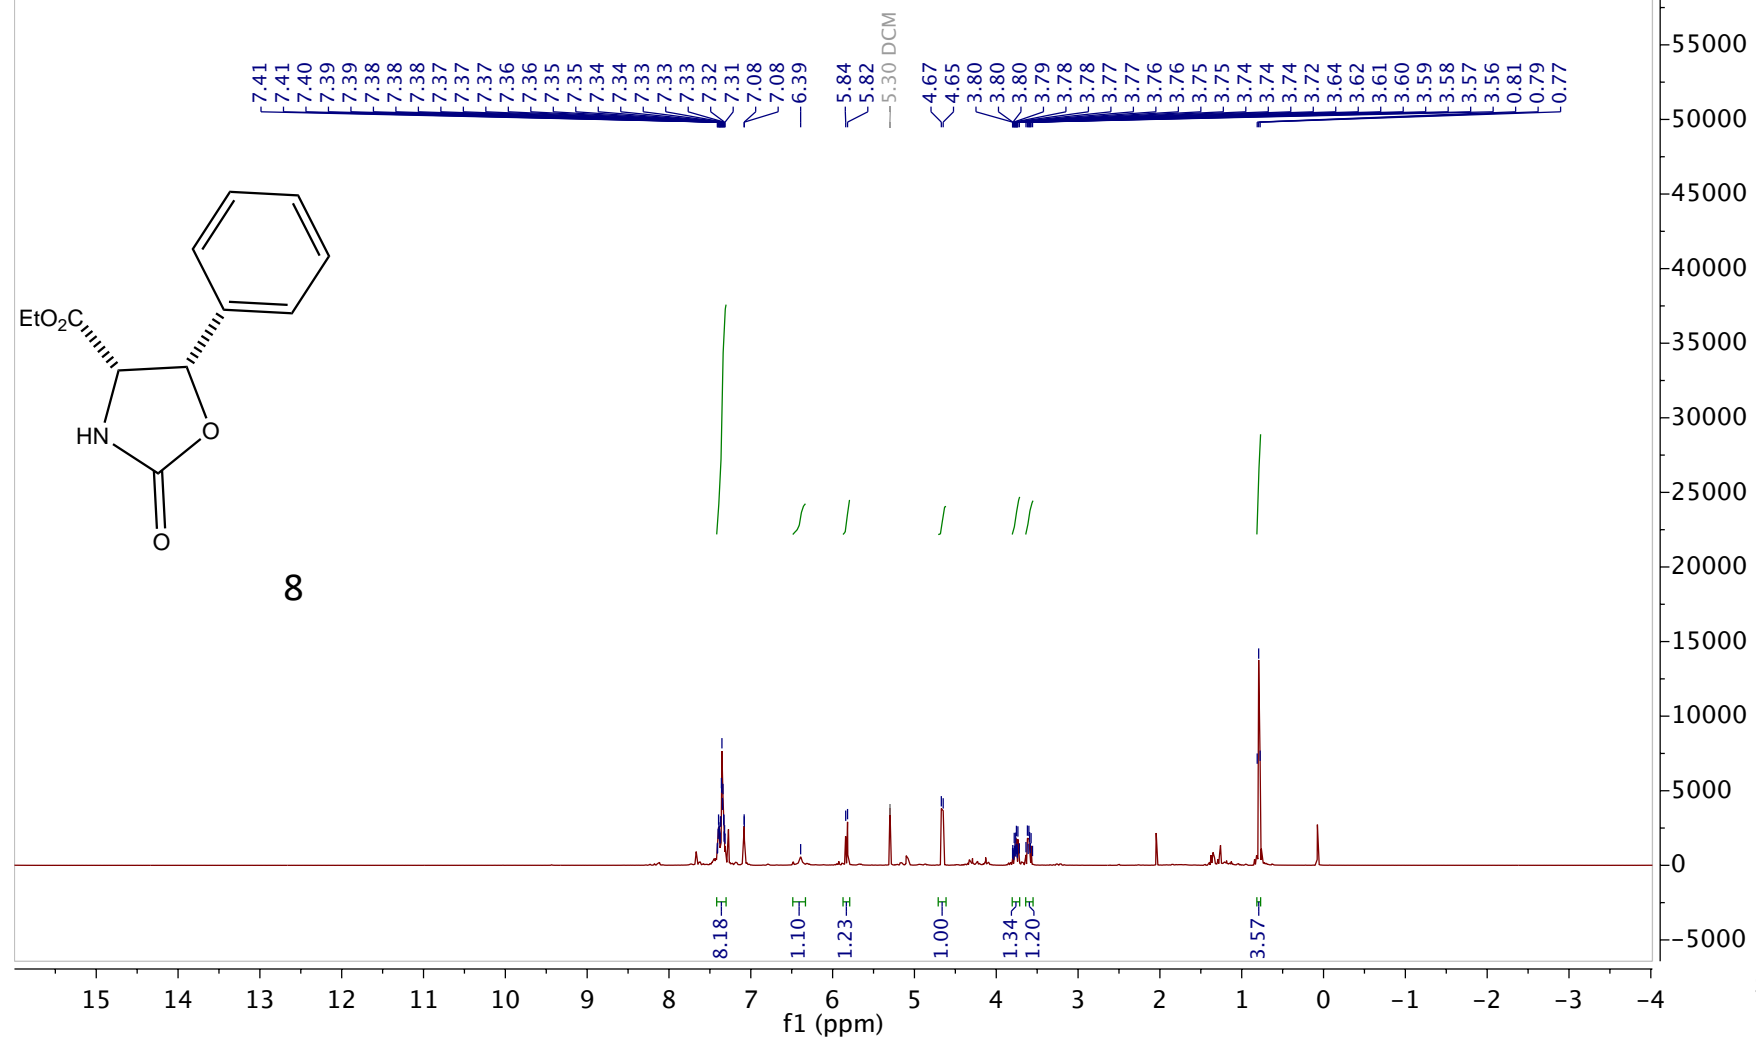



Apr13-2019-59-LS378(C).4.fid  
Instrument AVF400  
Chemist Liban Saney  
Group MGM  
Project Account Code DM7300  
c13acq\_512.crl CDCl3 {C:\NMR} mgmgrp 59

<sup>13</sup>C NMR (101 MHz, CDCl<sub>3</sub>)

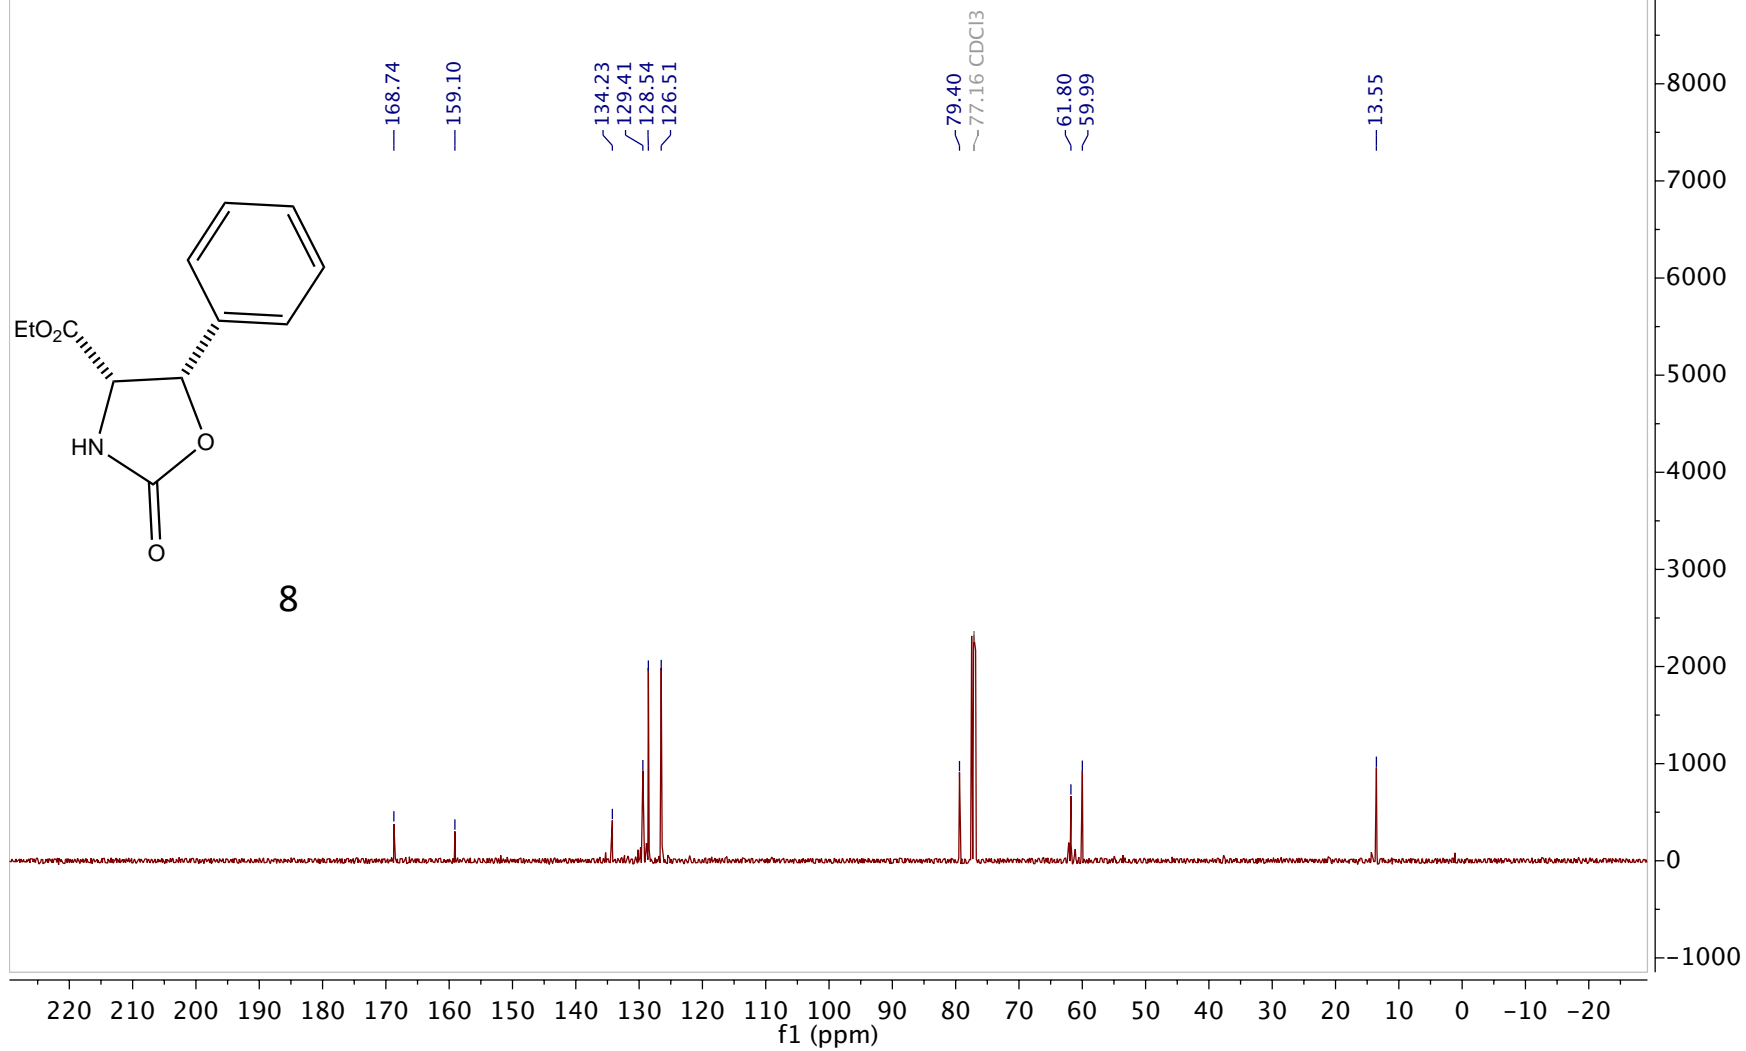

Aug16-2019-60-LS477(P) A8-B4.1.fid  
Instrument AVF400  
Chemist Liban Saney  
Group MGM  
Project Account Code DM7300  
h1acq.crl CDCl3 {C:\NMR} mgmgrp 60

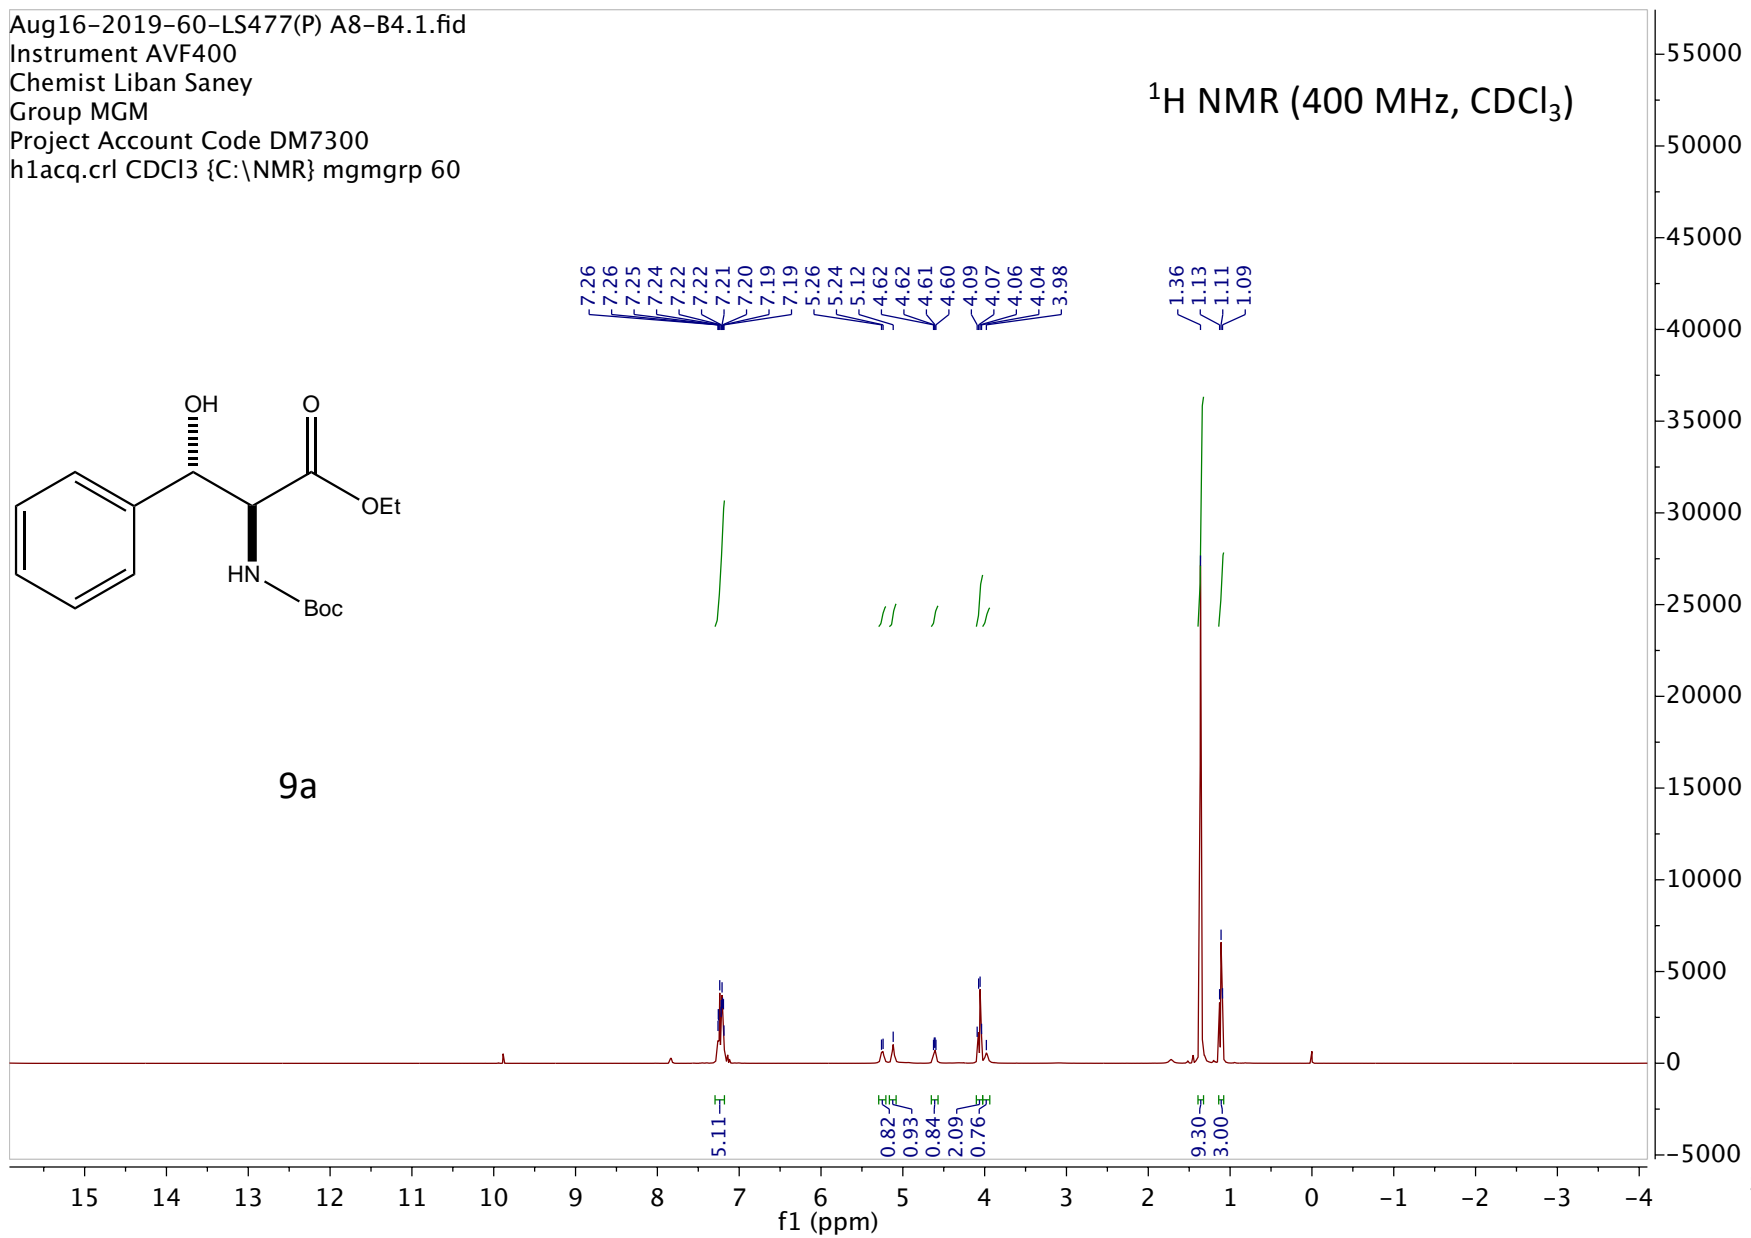

Aug16-2019-60-LS477(P) A8-B4.4.fid  
Instrument AVF400  
Chemist Liban Saney  
Group MGM  
Project Account Code DM7300  
c13acq\_512.crl CDCl3 {C:\NMR} mgmgrp 60

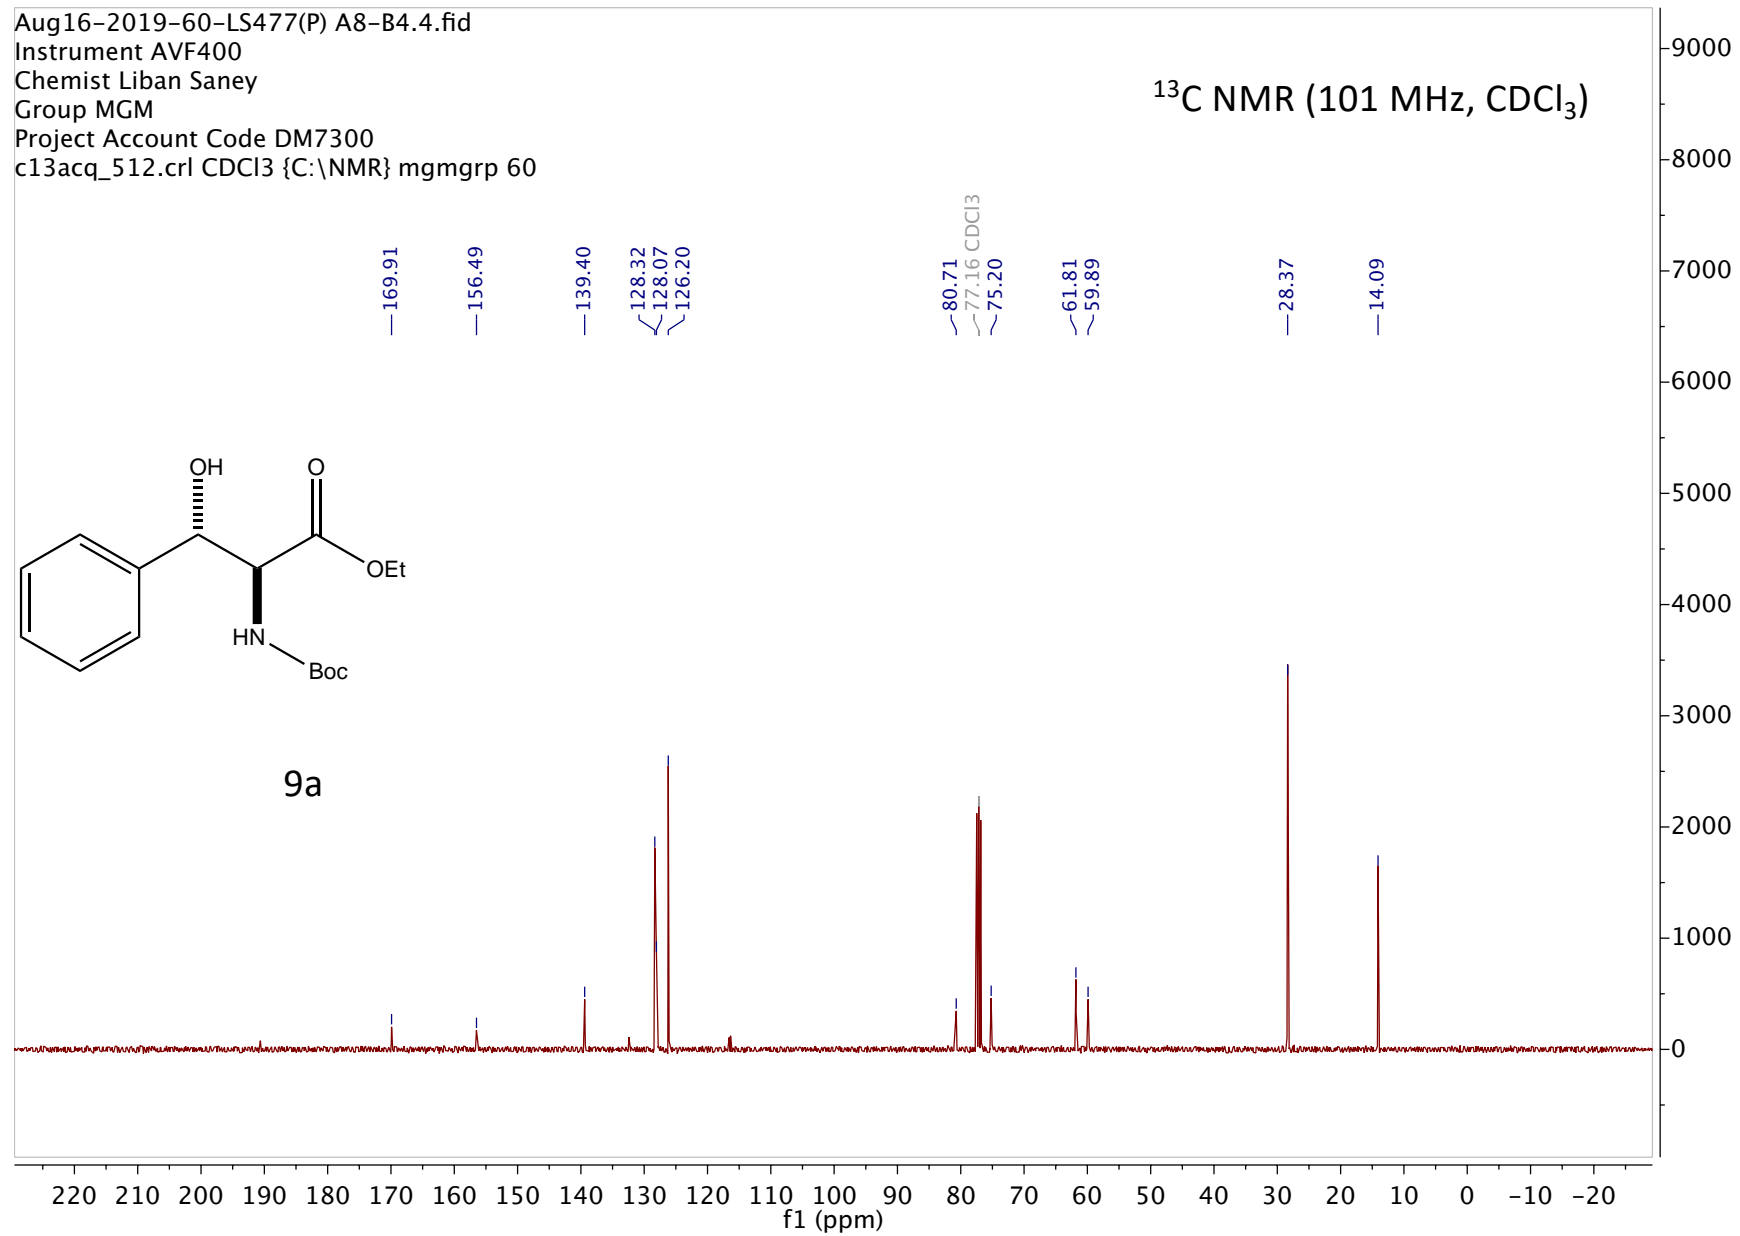

Dec10-2020-8-LS876(P) B9-D1.1.fid  
Instrument AVH400  
Group MGM  
Chemist Liban Saney  
Project Account Code DM7300  
h1acq.crl CDCl3 {C:\NMR} mgmgrp 8

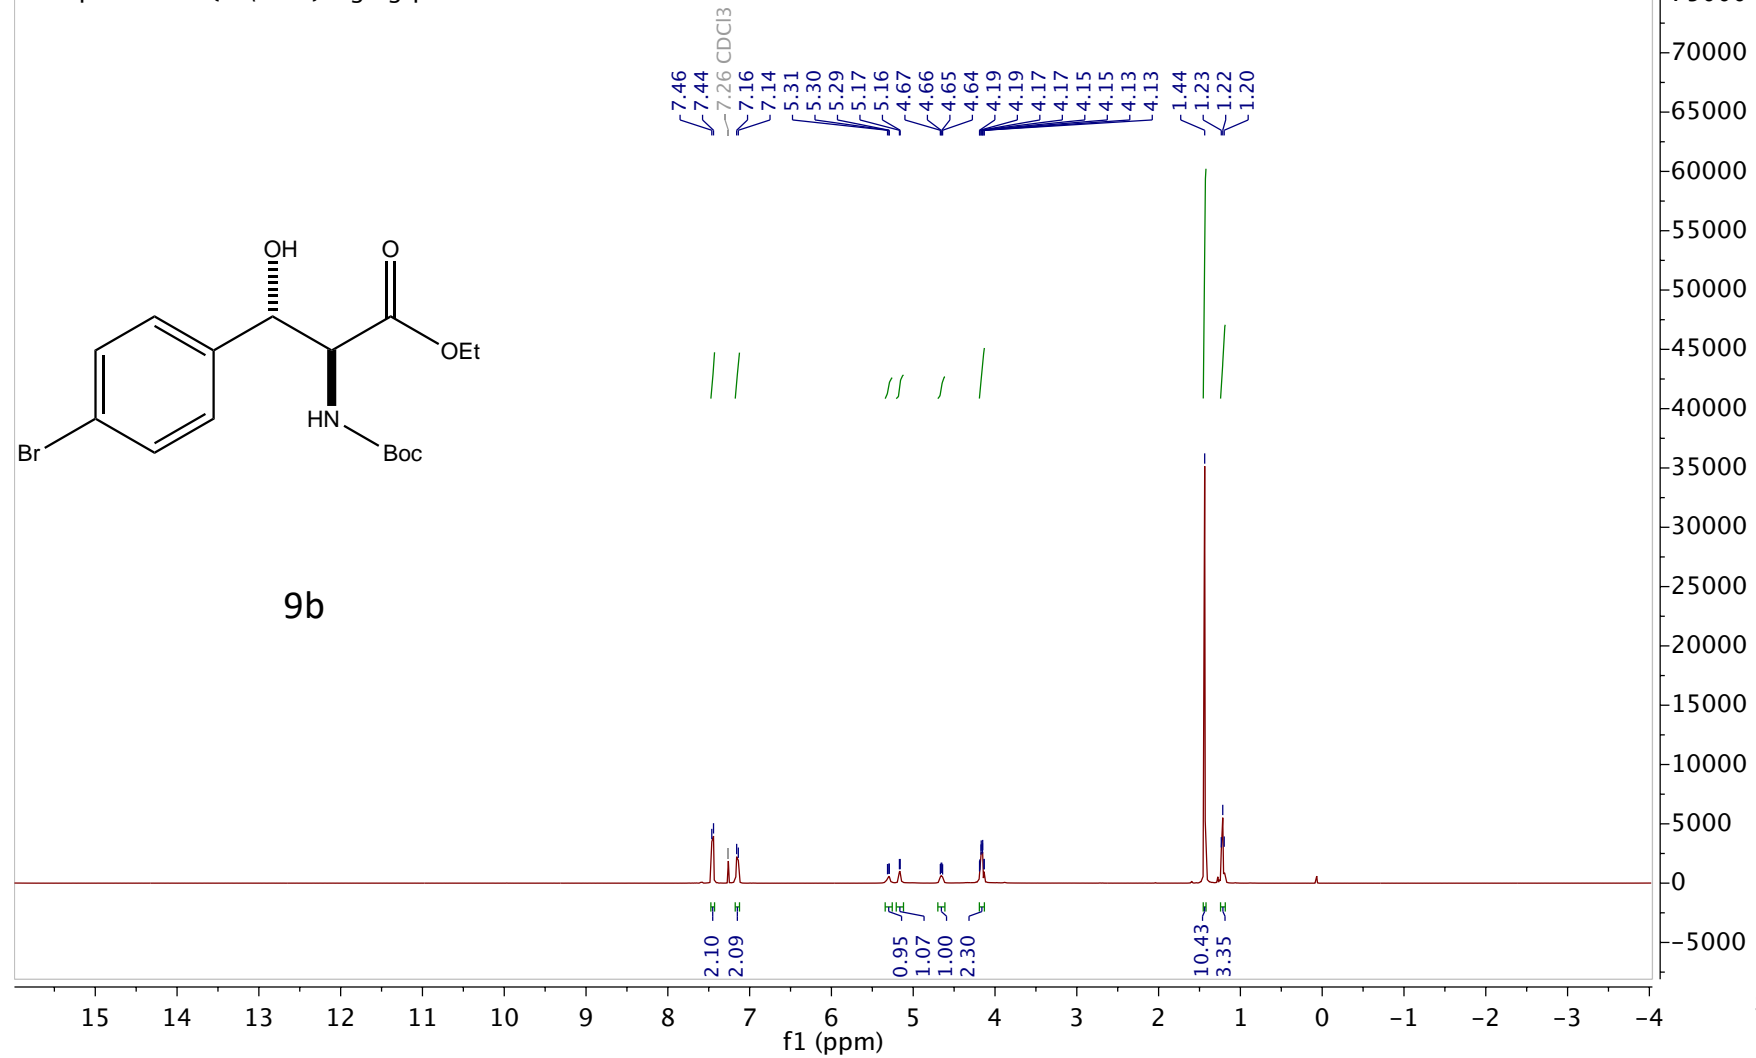

Dec10-2020-8-LS876(P) B9-D1.4.fid  
Instrument AVH400  
Group MGM  
Chemist Liban Saney  
Project Account Code DM7300  
c13acq\_512.crl CDCl3 {C:\NMR} mgmgrp 8

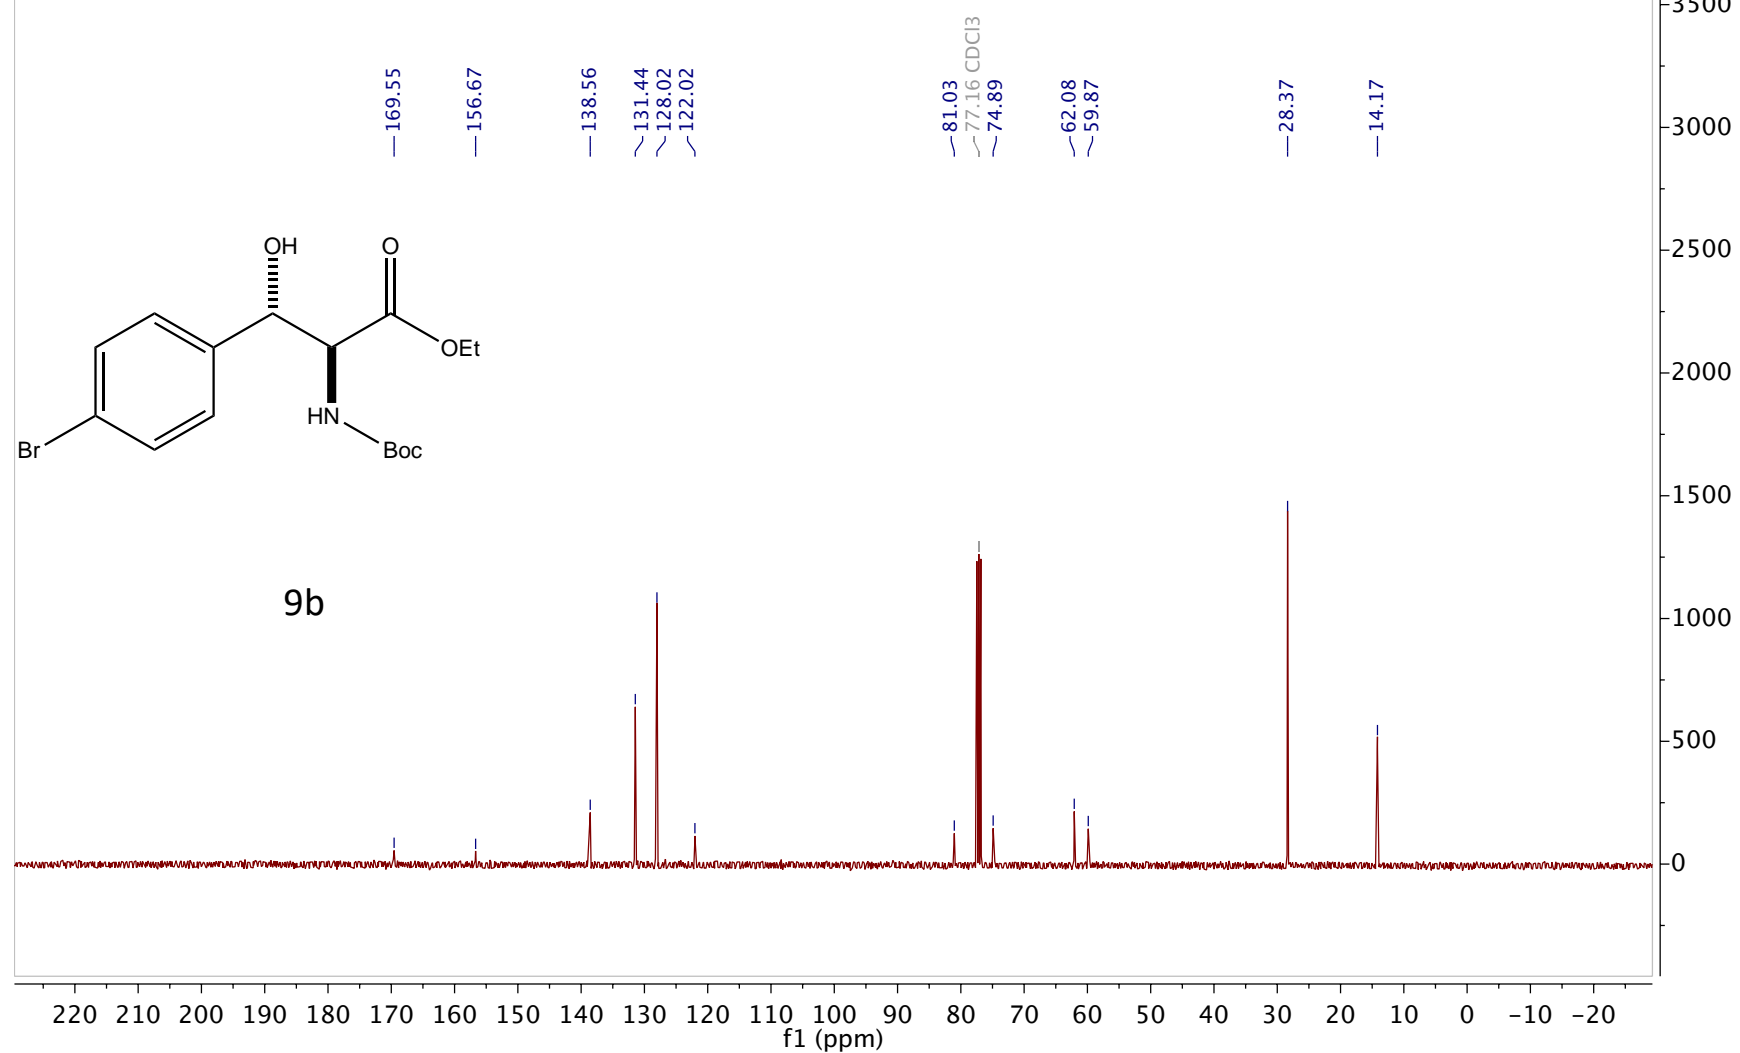

Dec08-2020-46-LS875(P) D2-D12.2.fid  
Instrument AVH400  
Group MGM  
Chemist Liban Saney  
Project Account Code DM7300  
h1acq.crl CDCl3 {C:\NMR} mgmgrp 46

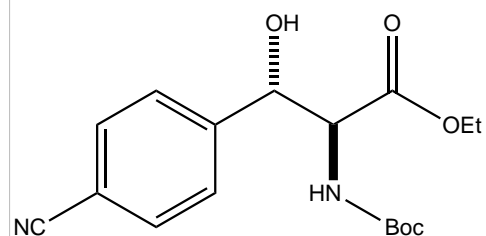

9c

<sup>1</sup>H NMR (400 MHz, CDCl<sub>3</sub>)

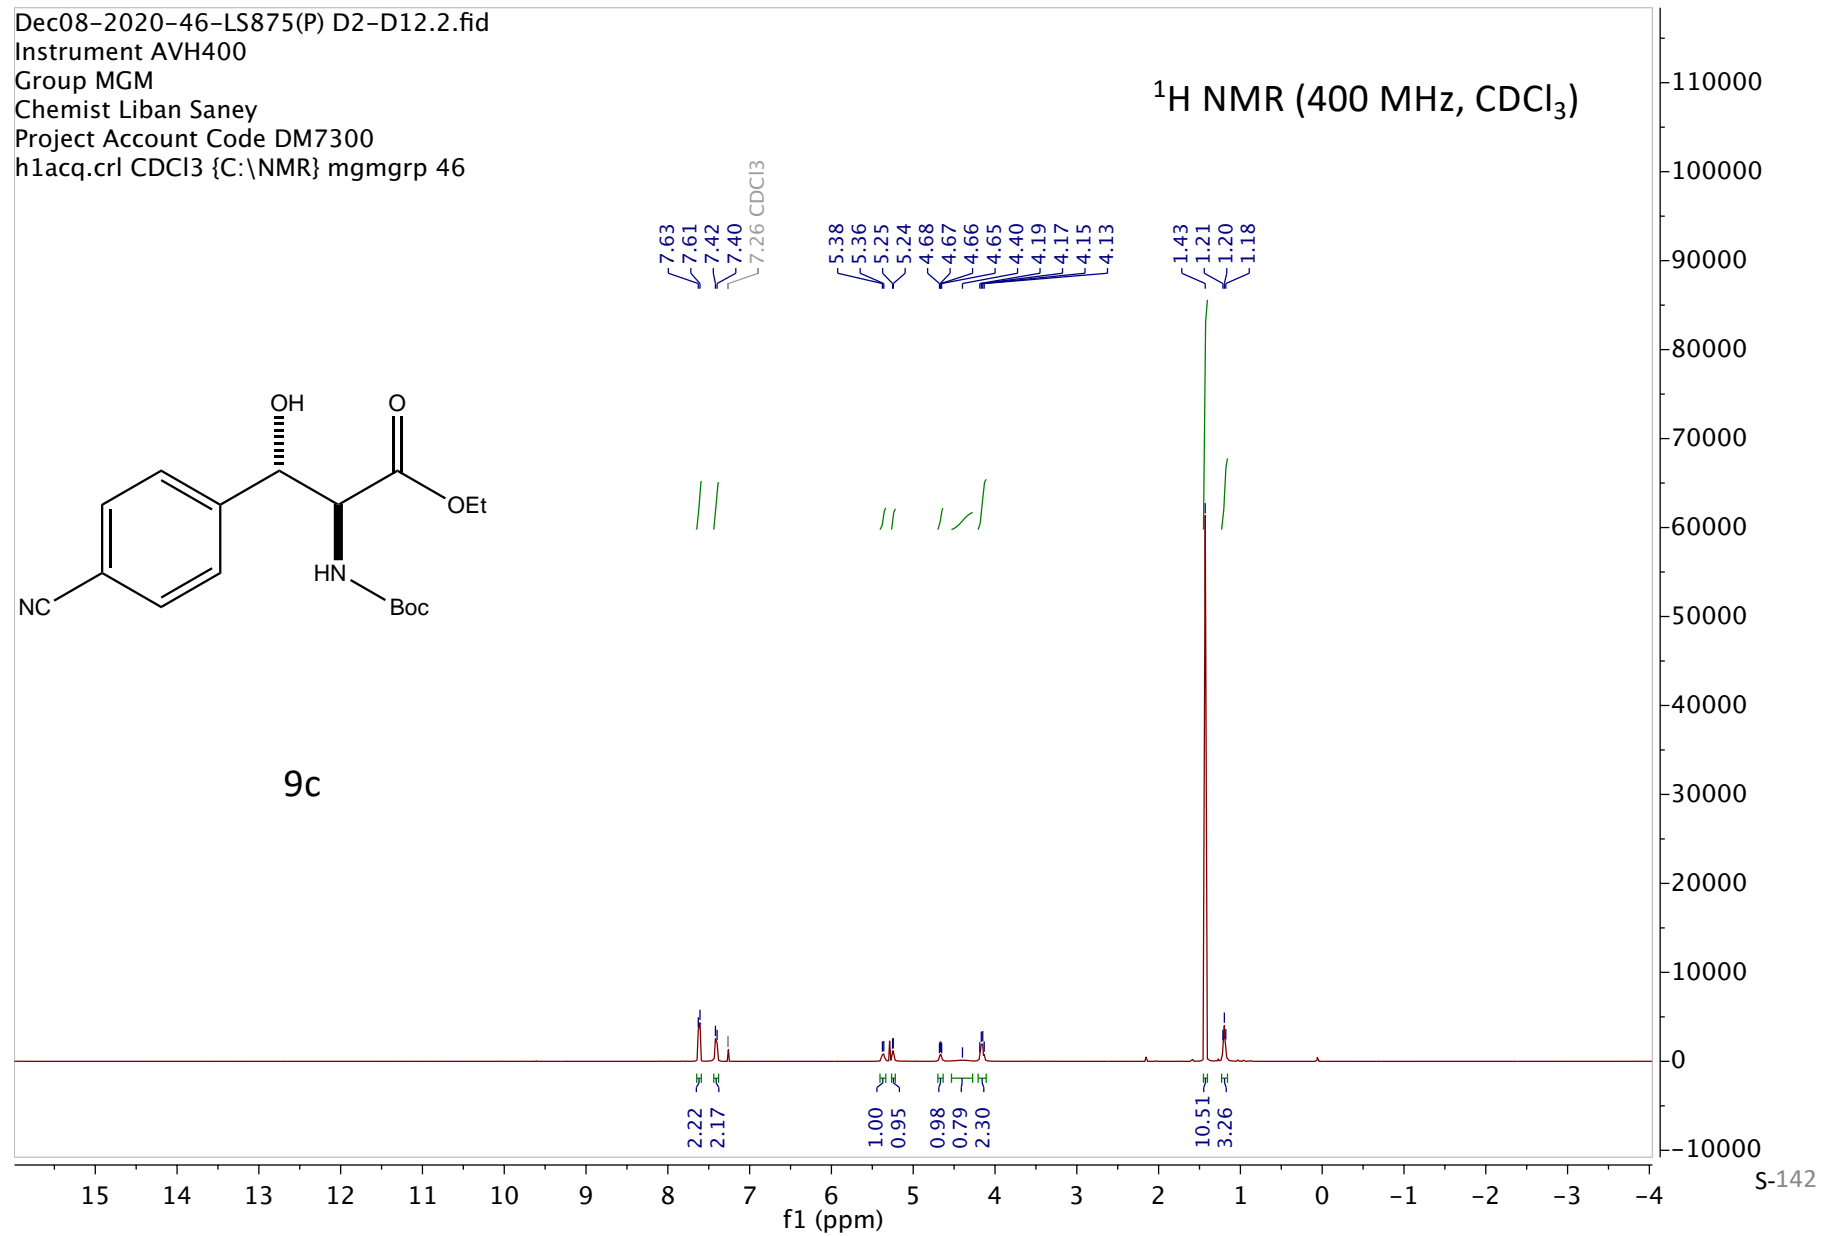

Dec08-2020-46-LS875(P) D2-D12.5.fid  
Instrument AVH400  
Group MGM  
Chemist Liban Saney  
Project Account Code DM7300  
c13acq\_512.crl CDCl3 {C:\NMR} mgmgrp 46

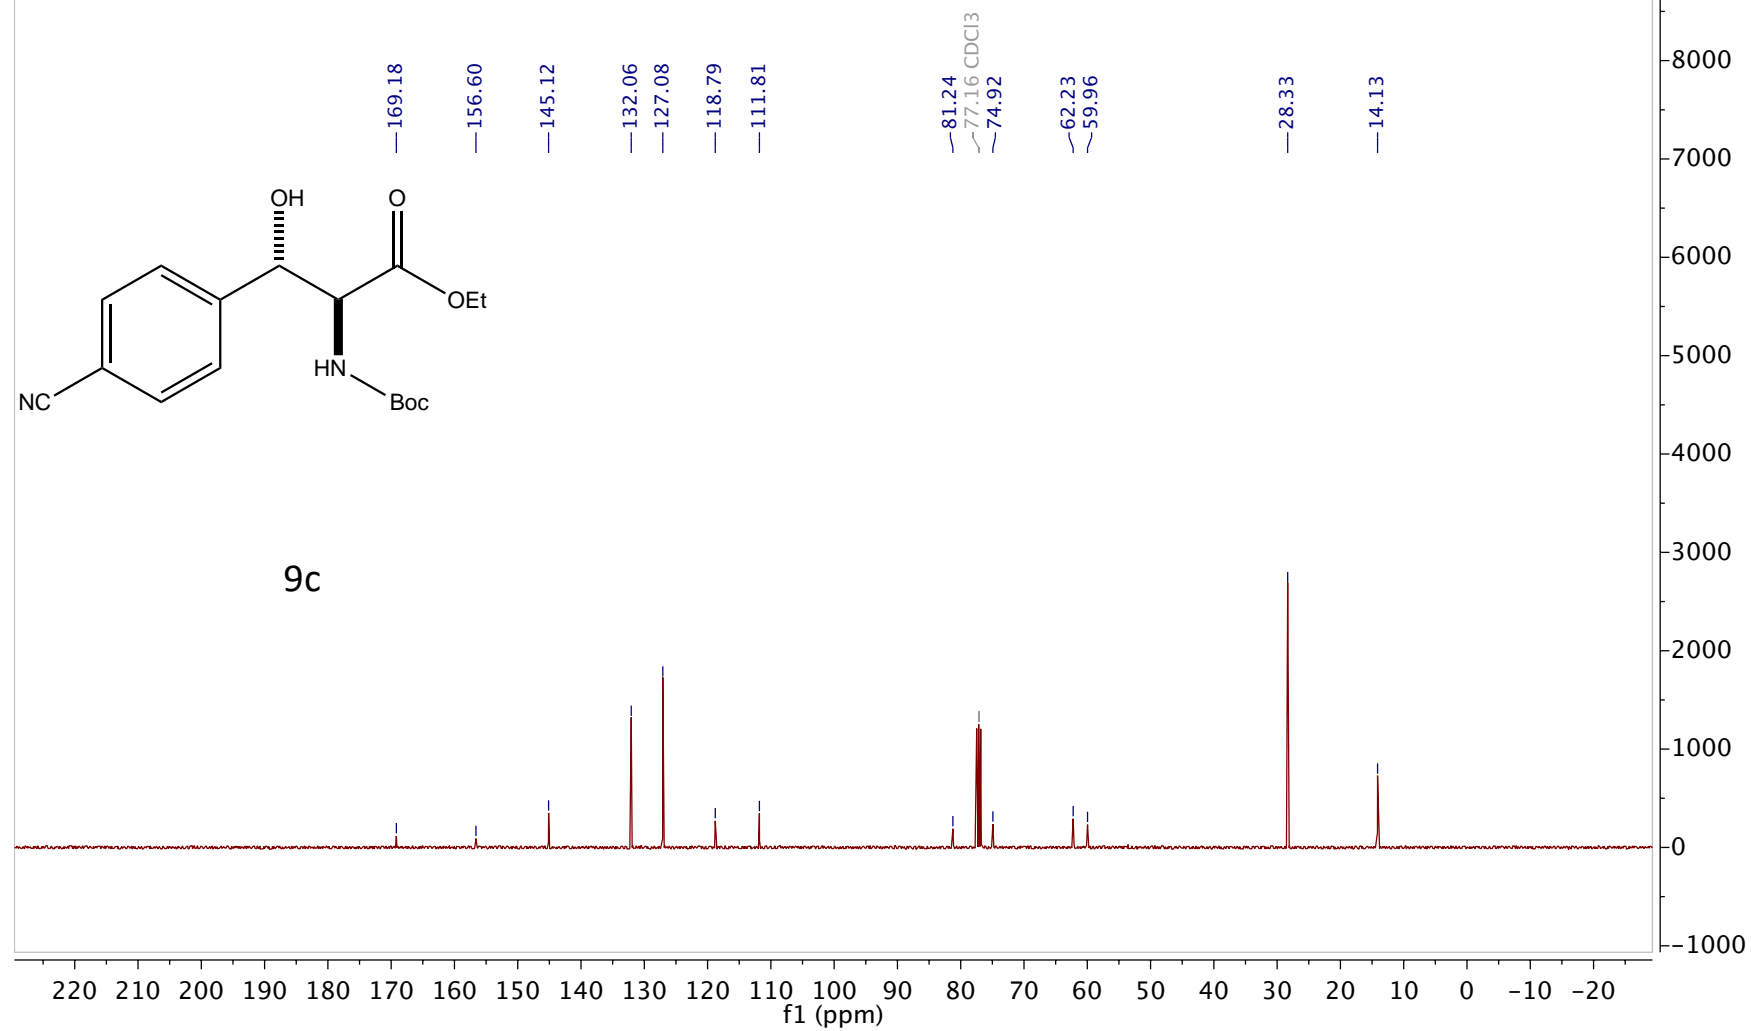

Dec07-2020-39-LS874(P) C2-C9.1.fid  
Instrument AVH400  
Group MGM  
Chemist Liban Saney  
Project Account Code DM7300  
h1acq.crl CDCl3 {C:\NMR} mgmgrp 39

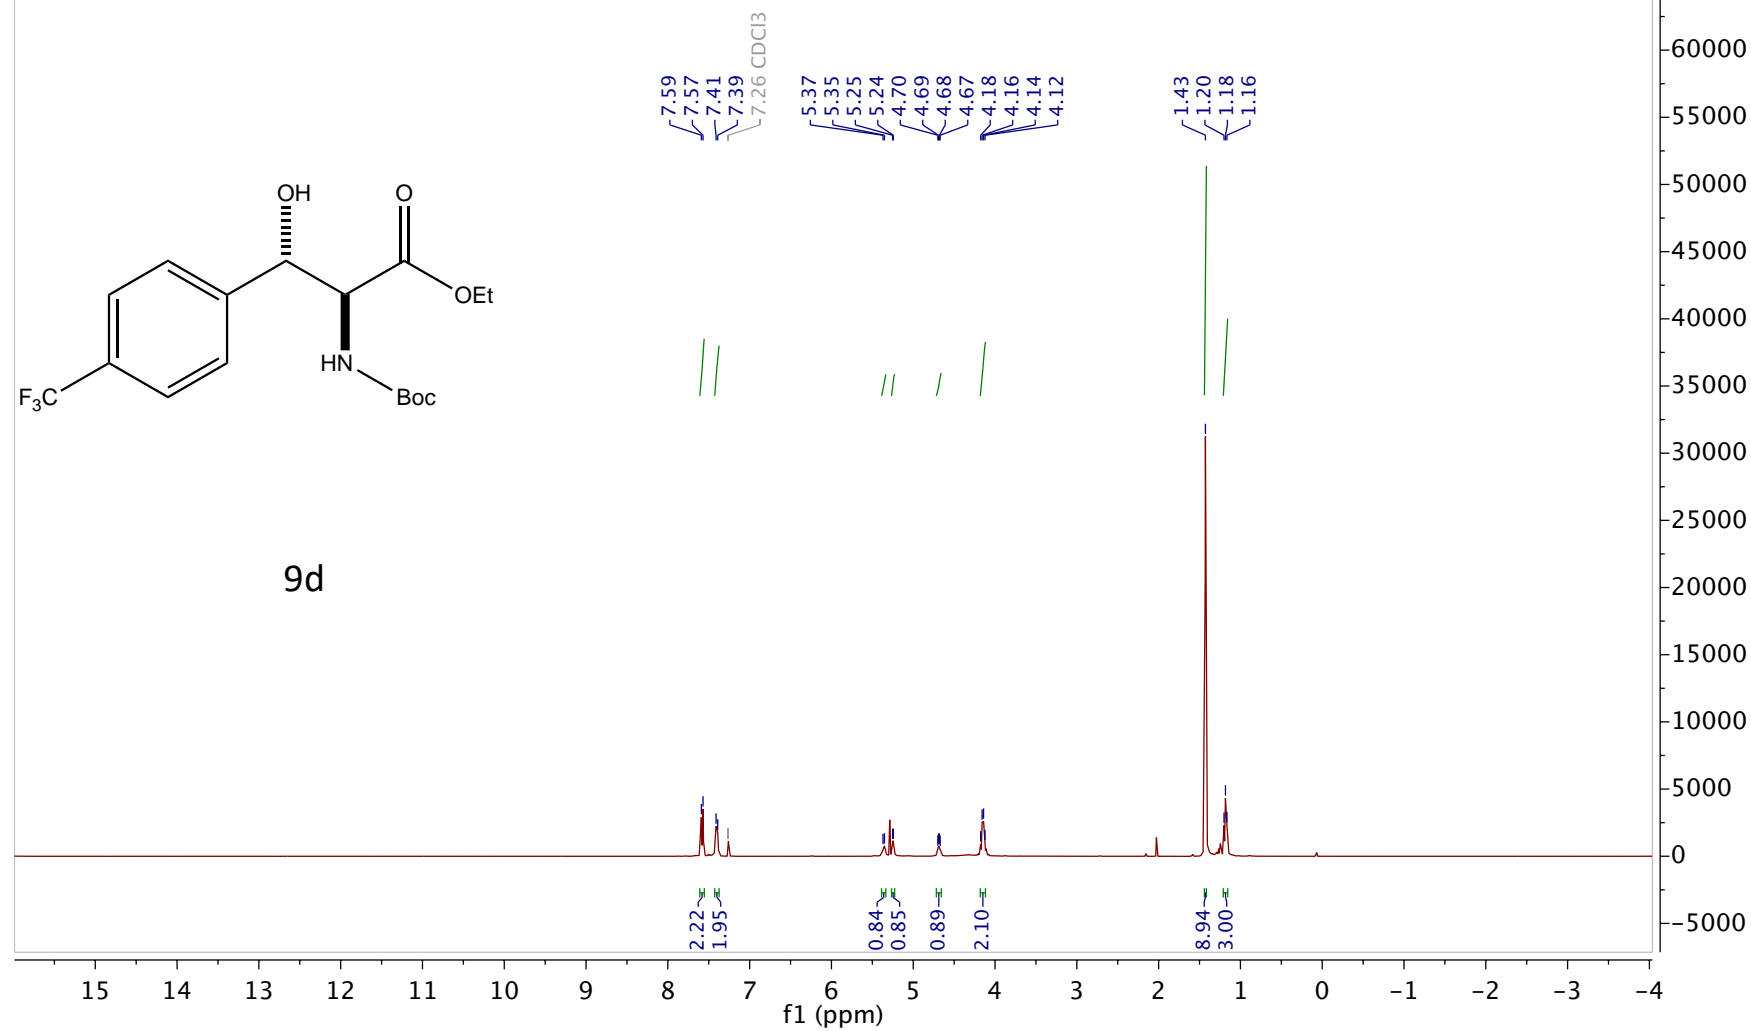



Dec07-2020-39-LS874(P) C2-C9.4.fid  
Instrument AVH400  
Group MGM  
Chemist Liban Saney  
Project Account Code DM7300  
c13acq\_512.crl CDCl3 {C:\NMR} mgmgrp 39

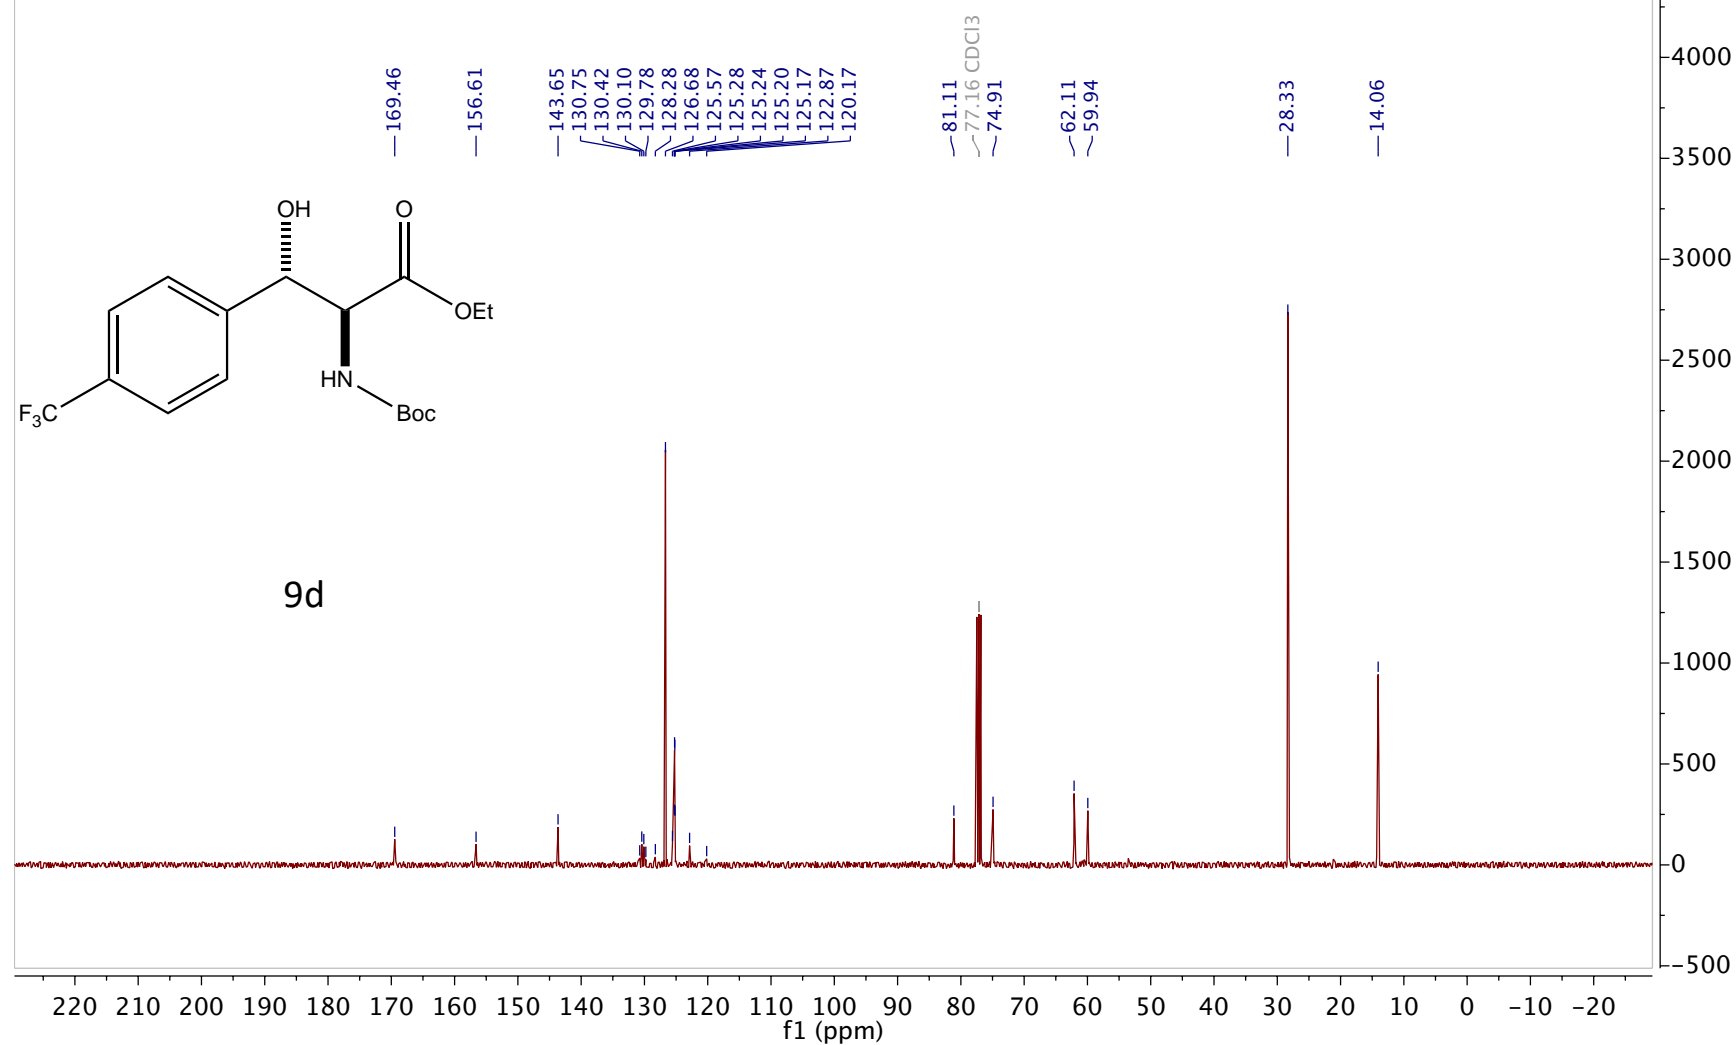

Dec07-2020-39-LS874(P) C2-C9.6.fid  
Instrument AVH400  
Group MGM  
Chemist Liban Saney  
Project Account Code DM7300  
f19dec\_256.crl CDCl3 {C:\NMR} mgmgrp 39

$^{19}\text{F}$  NMR (377 MHz,  $\text{CDCl}_3$ )

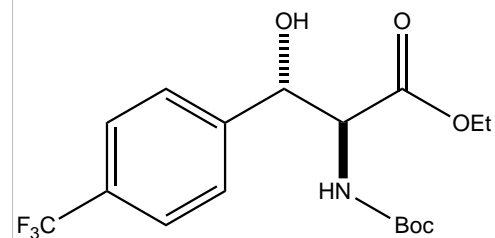

9d

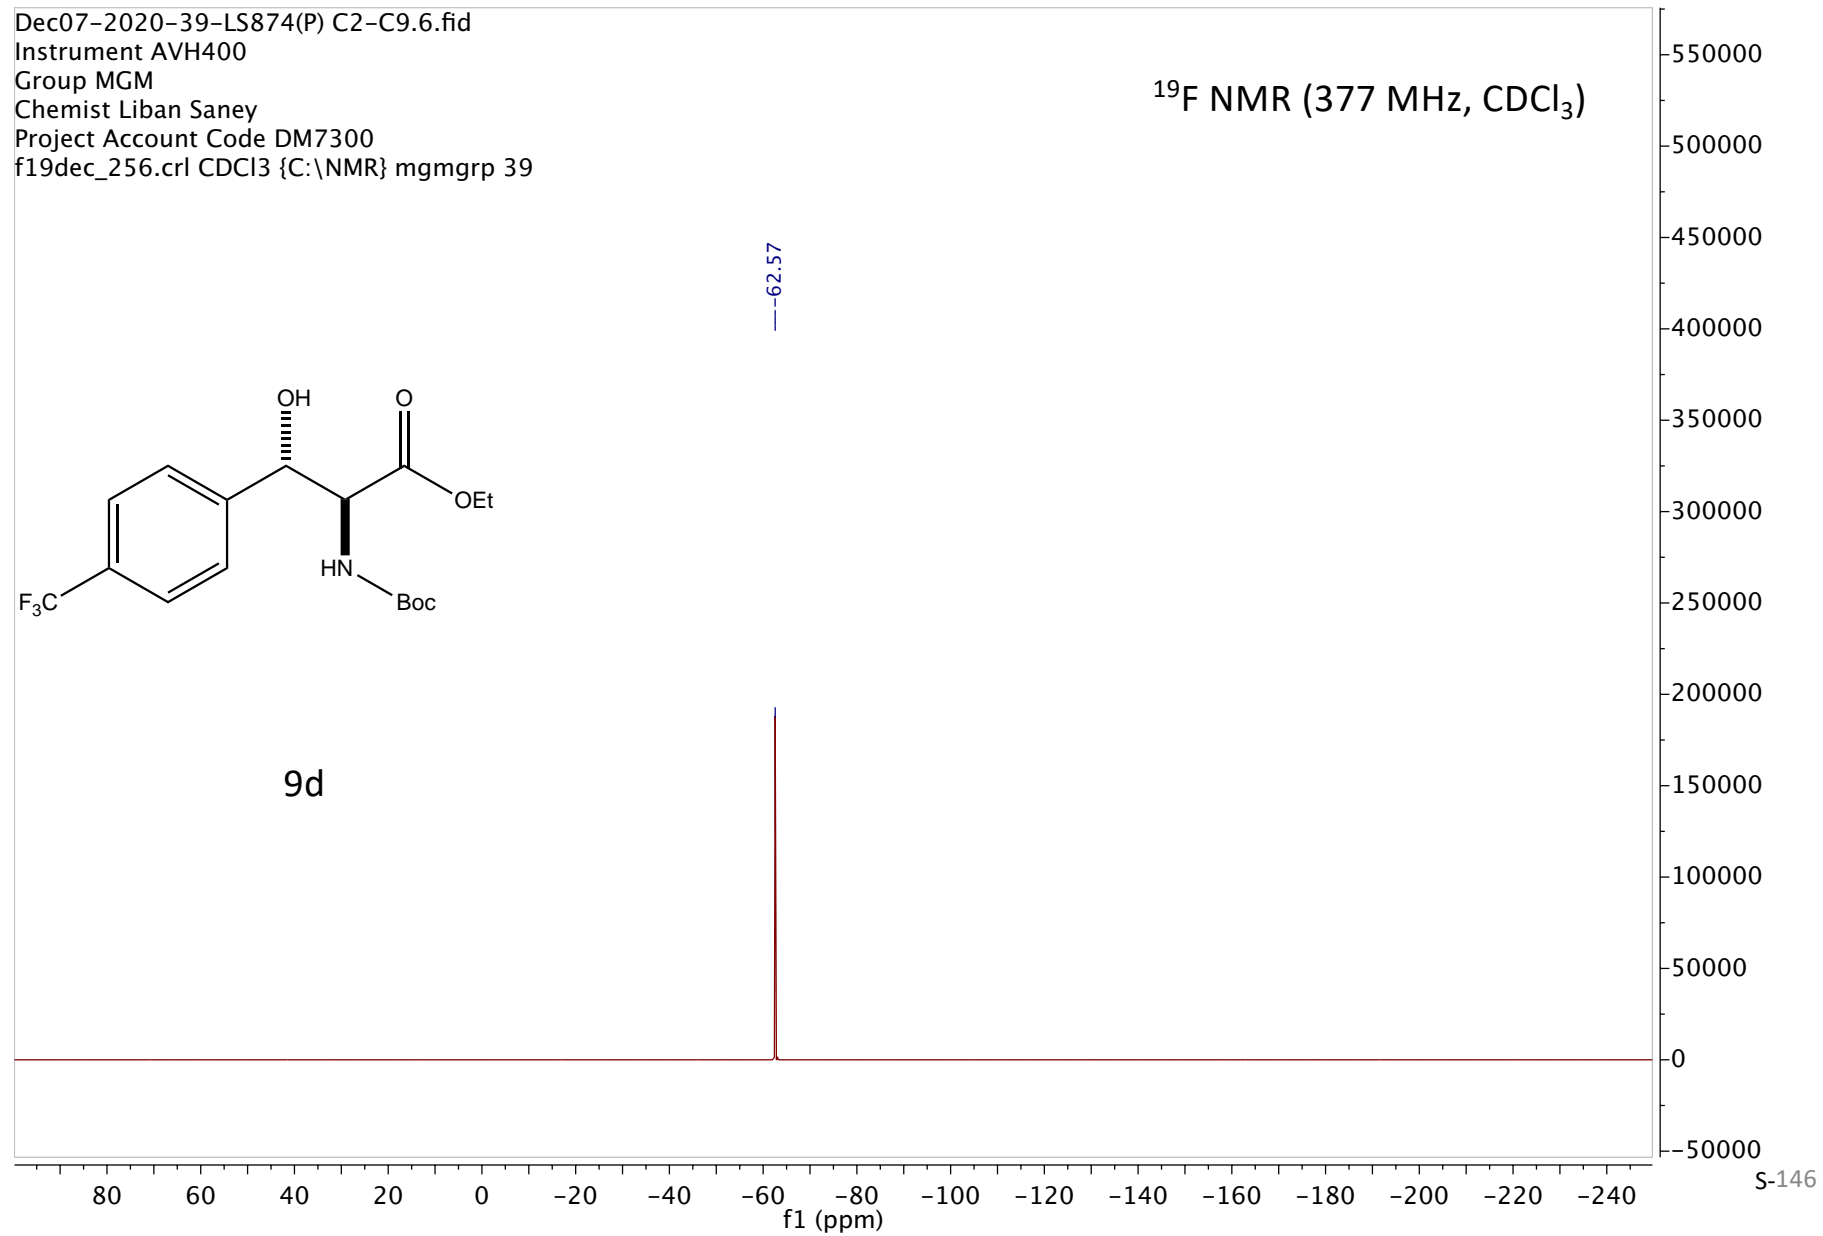

Dec10-2020-7-LS877(P) C10-D9.1.fid  
Instrument AVH400  
Group MGM  
Chemist Liban Saney  
Project Account Code DM7300  
h1acq.crl CDCl3 {C:\NMR} mgmgrp 7

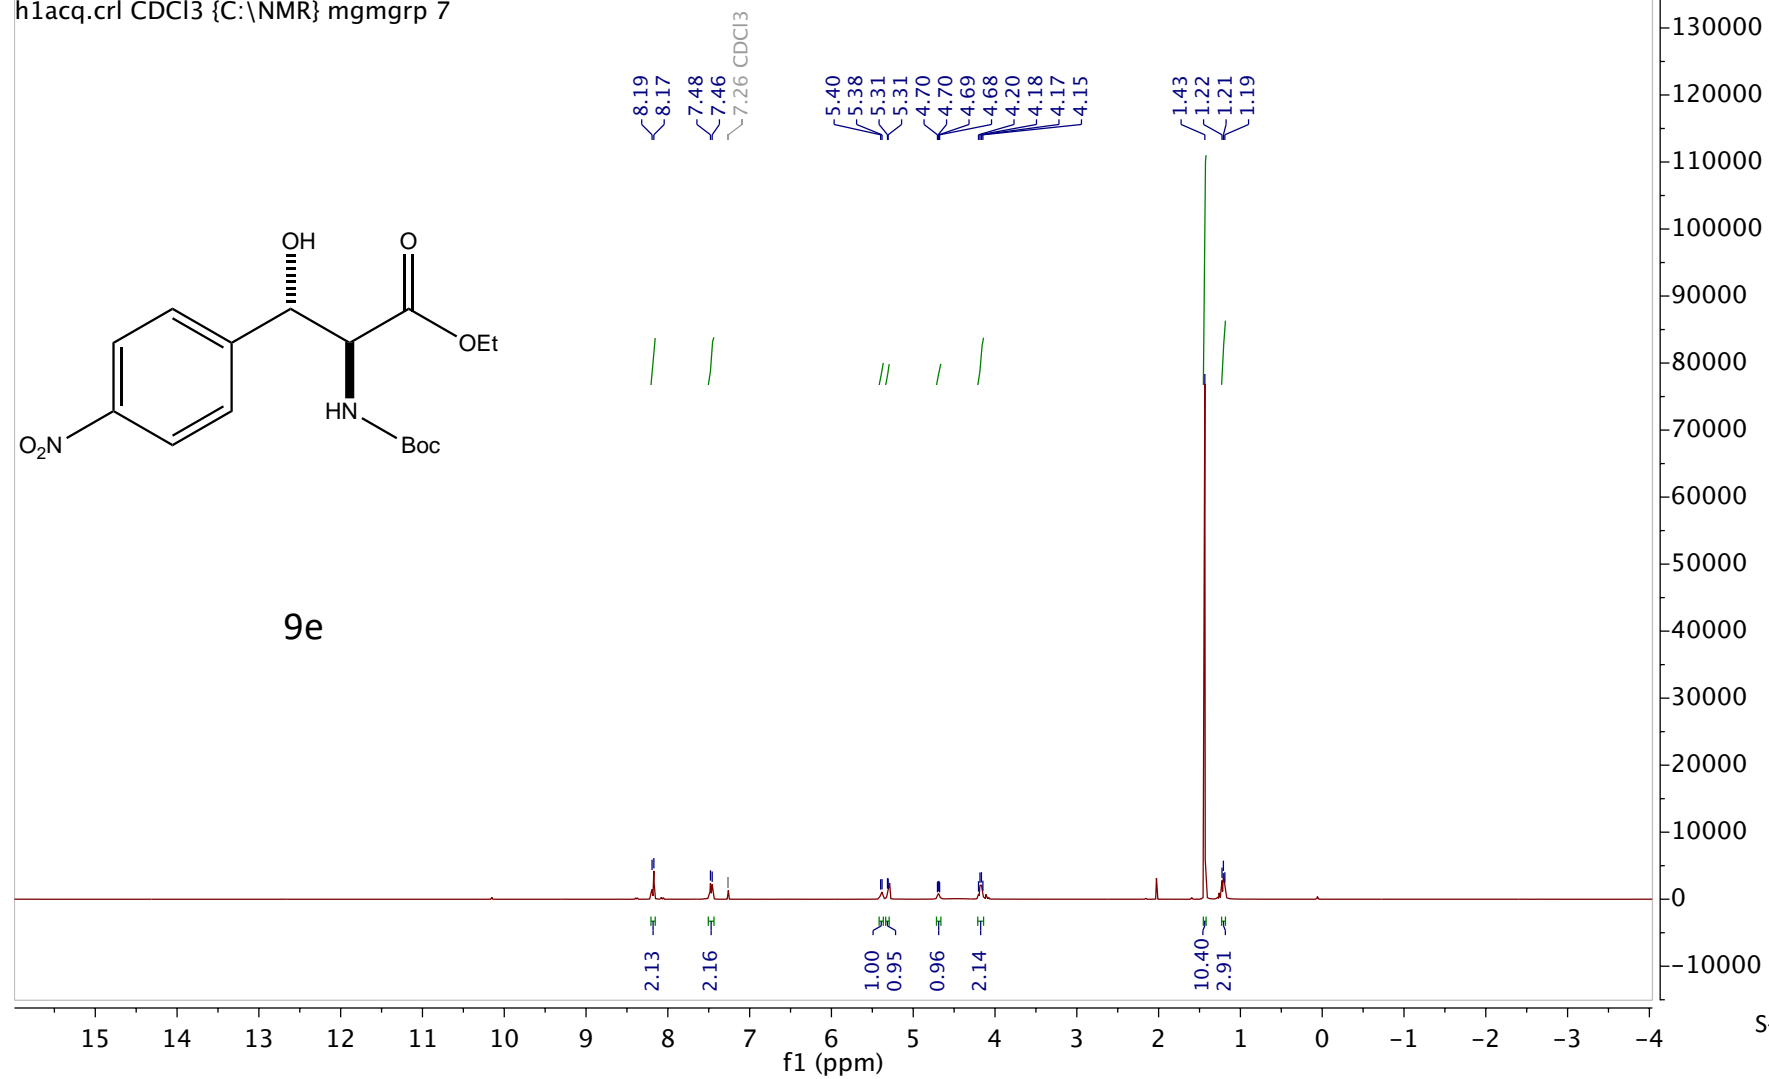

Dec10-2020-7-LS877(P) C10-D9.4.fid  
Instrument AVH400  
Group MGM  
Chemist Liban Saney  
Project Account Code DM7300  
c13acq\_512.crl CDCl3 {C:\NMR} mgmgrp 7

<sup>13</sup>C NMR (101 MHz, CDCl<sub>3</sub>)

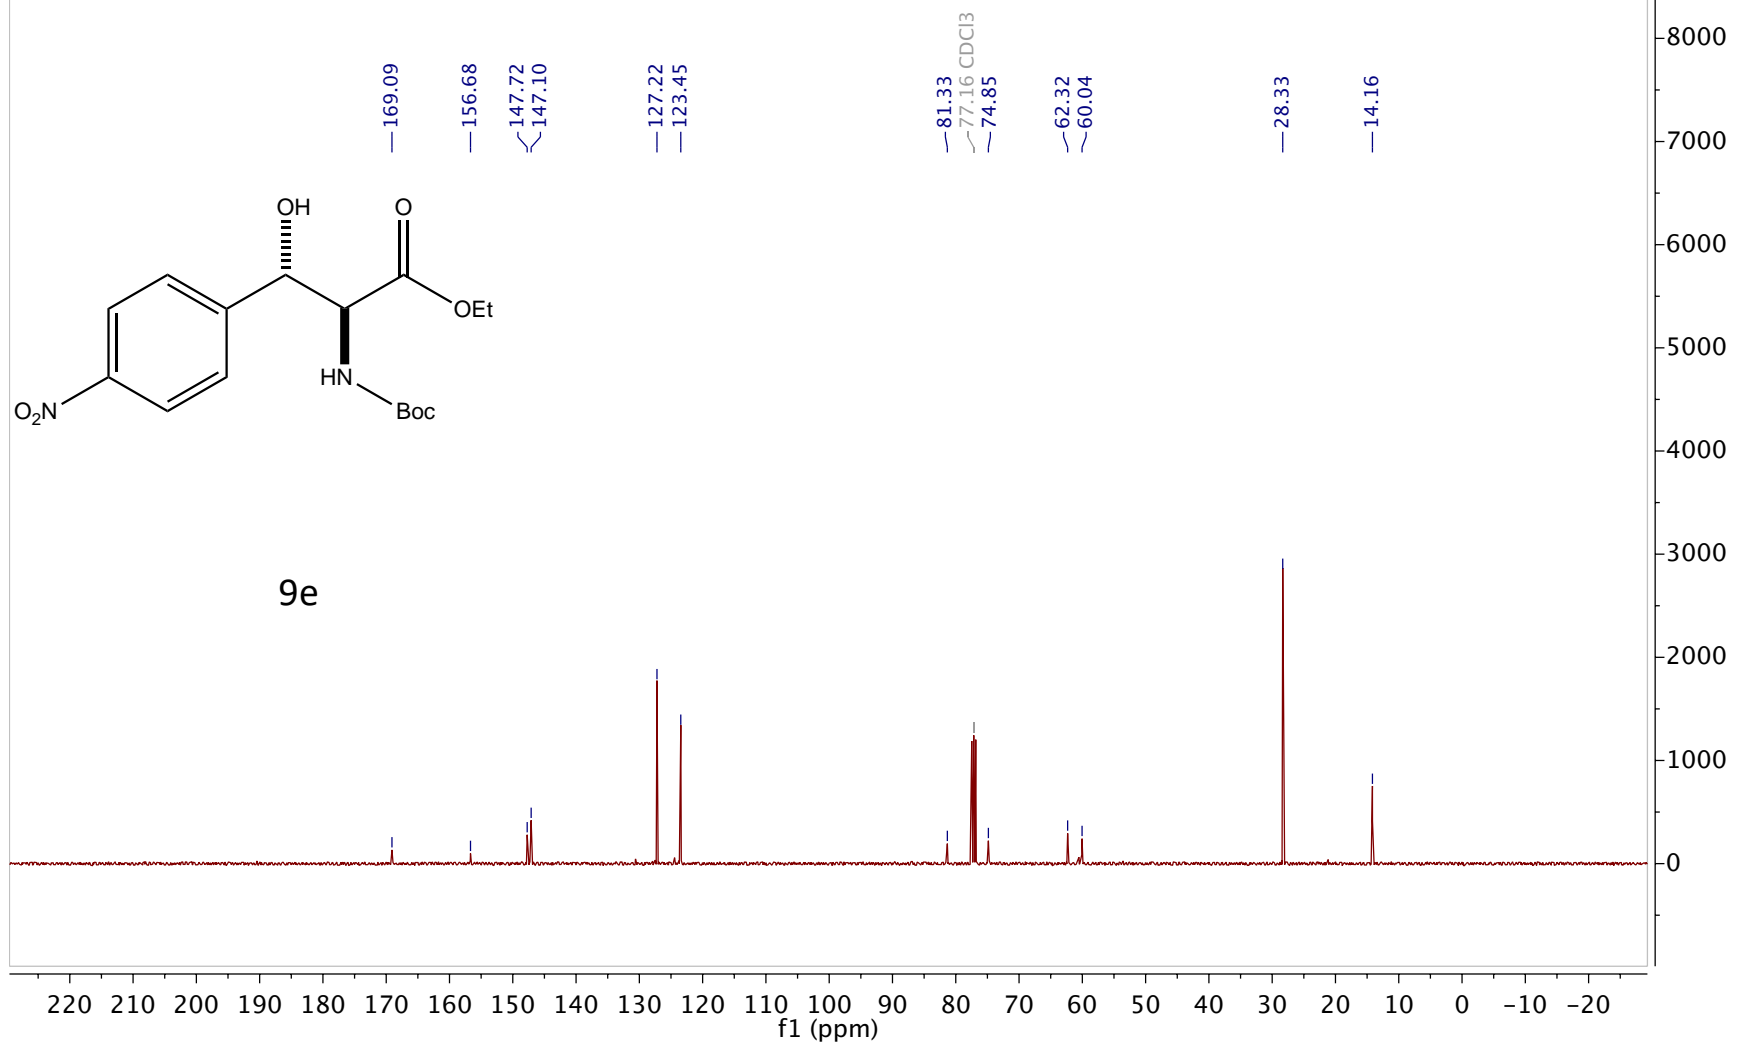

Jan13-2021-52-LS900(P) D3-E8.1.fid  
Instrument AVH400  
Group MGM  
Chemist Liban Saney  
Project Account Code DM7300  
h1acq.crl CDCl3 {C:\NMR} mgmgrp 52

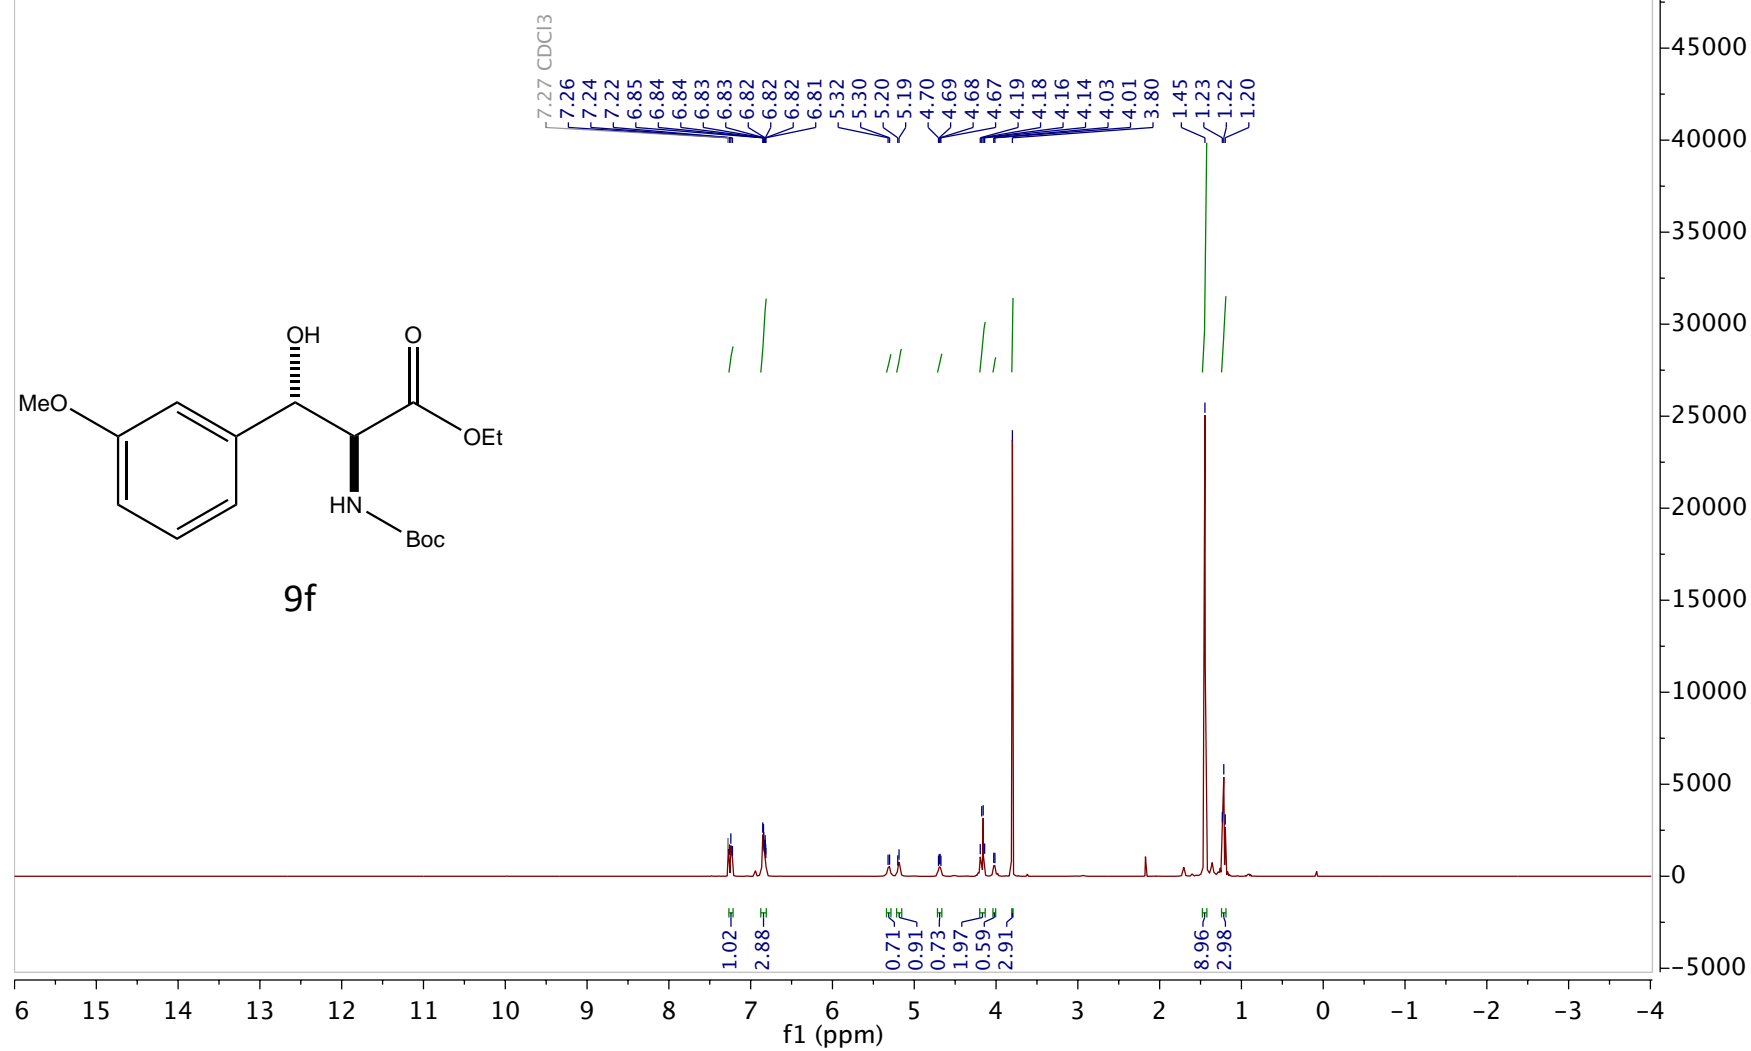

Jan13-2021-52-LS900(P) D3-E8.4.fid  
Instrument AVH400  
Group MGM  
Chemist Liban Saney  
Project Account Code DM7300  
c13acq\_512.crl CDCl3 {C:\NMR} mgmgrp 52

$^{13}\text{C}$  NMR (101 MHz,  $\text{CDCl}_3$ )

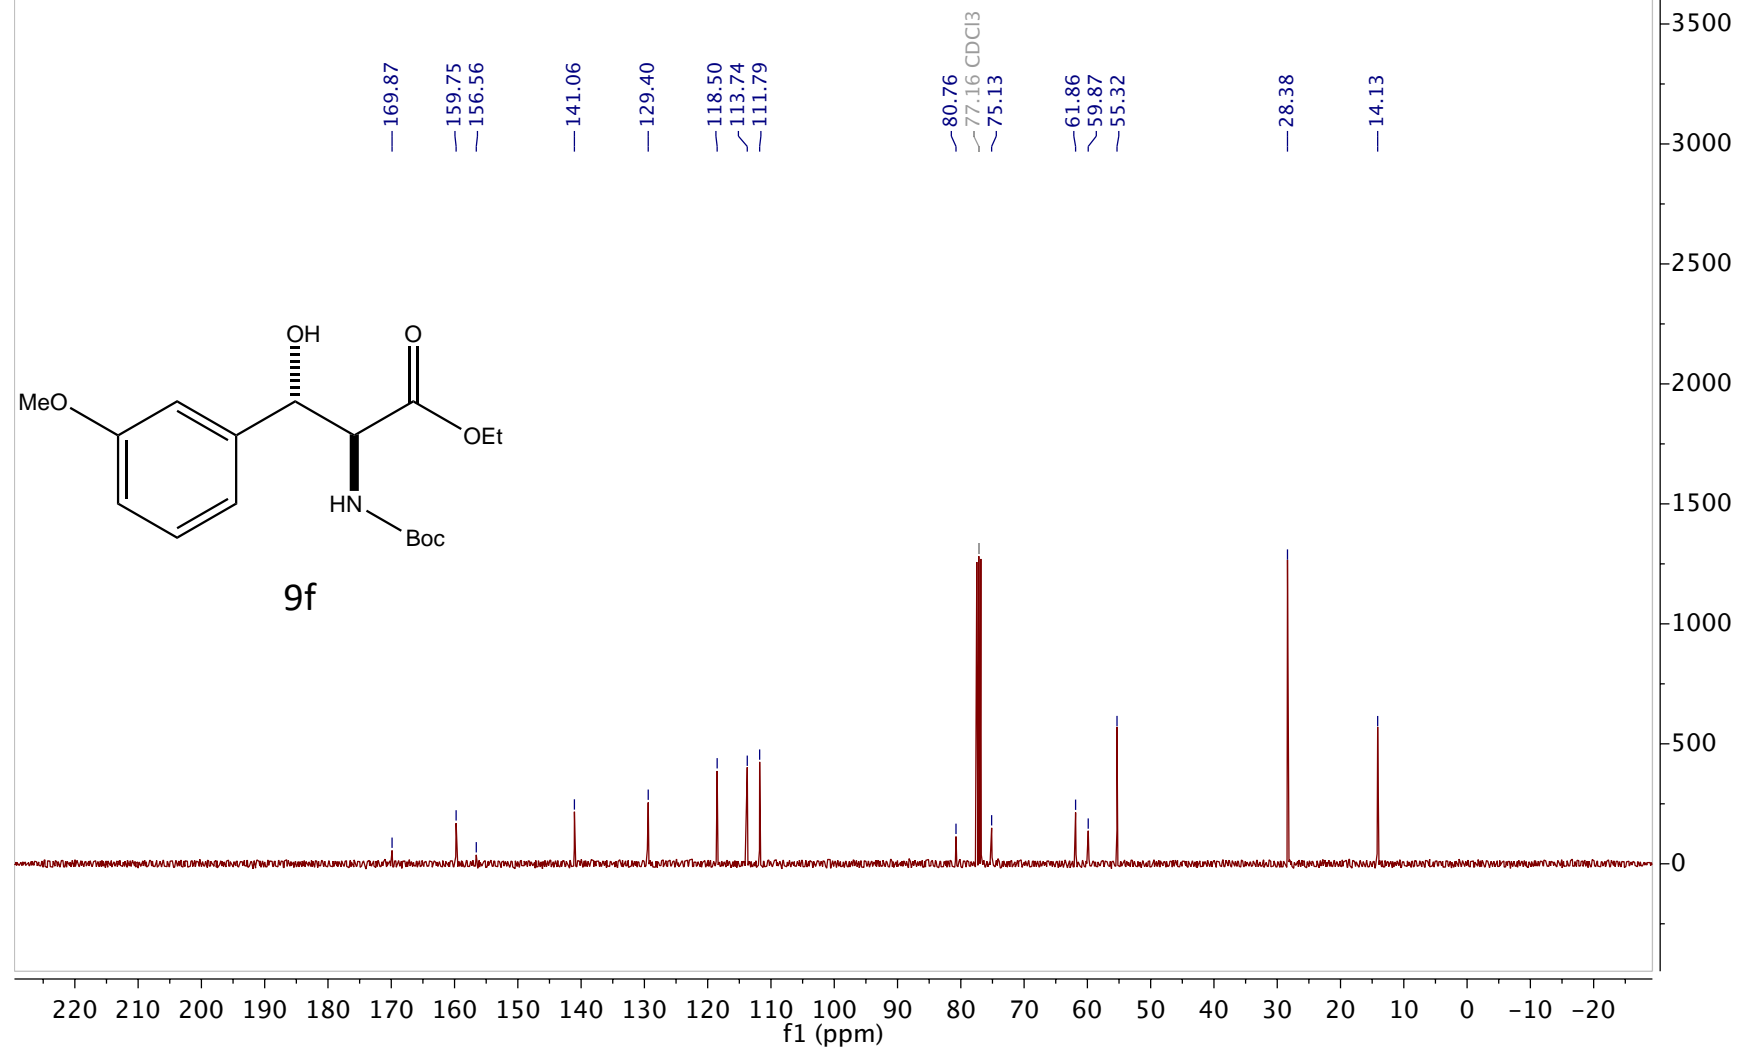

Dec26-2020-3-LS893(P) C4-D11.1.fid  
Instrument AVH400  
Group MGM  
Chemist Liban Saney  
Project Account Code DM7300  
h1acq.crl CDCl3 {C:\NMR} mgmgrp 3

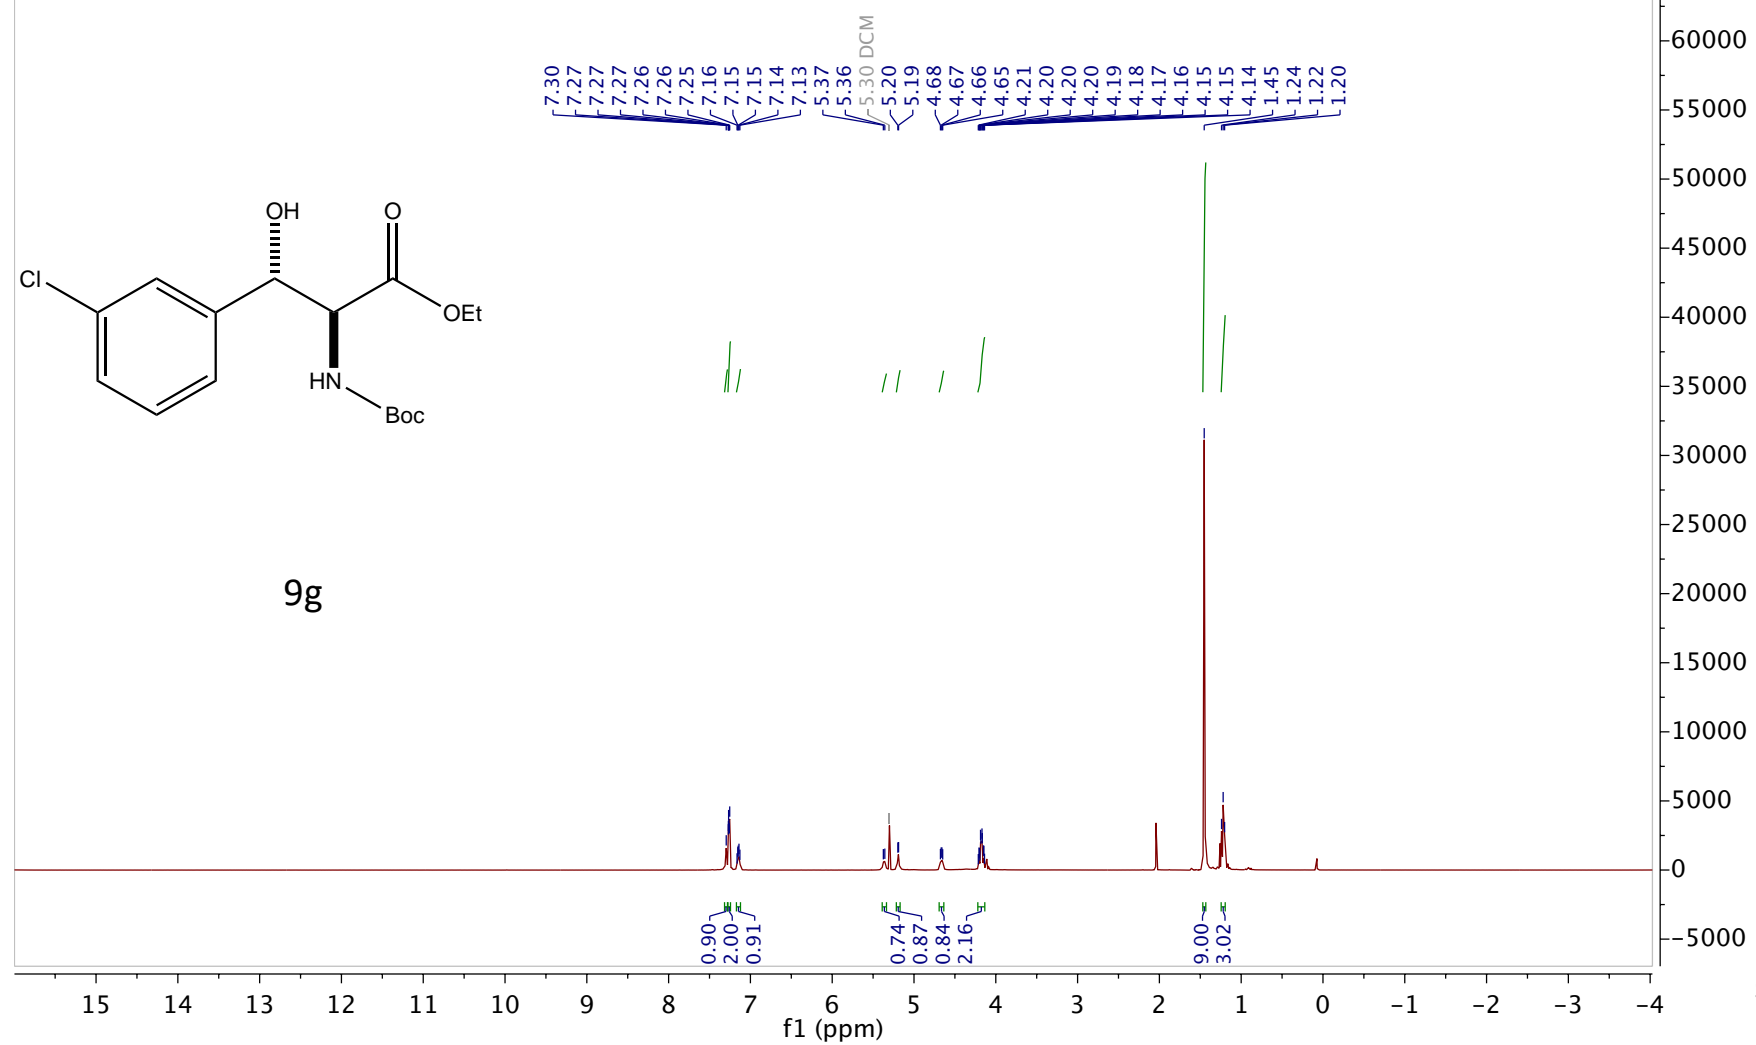

Dec26-2020-3-LS893(P) C4-D11.4.fid  
Instrument AVH400  
Group MGM  
Chemist Liban Saney  
Project Account Code DM7300  
c13acq\_512.crl CDCl3 {C:\NMR} mgmgrp 3

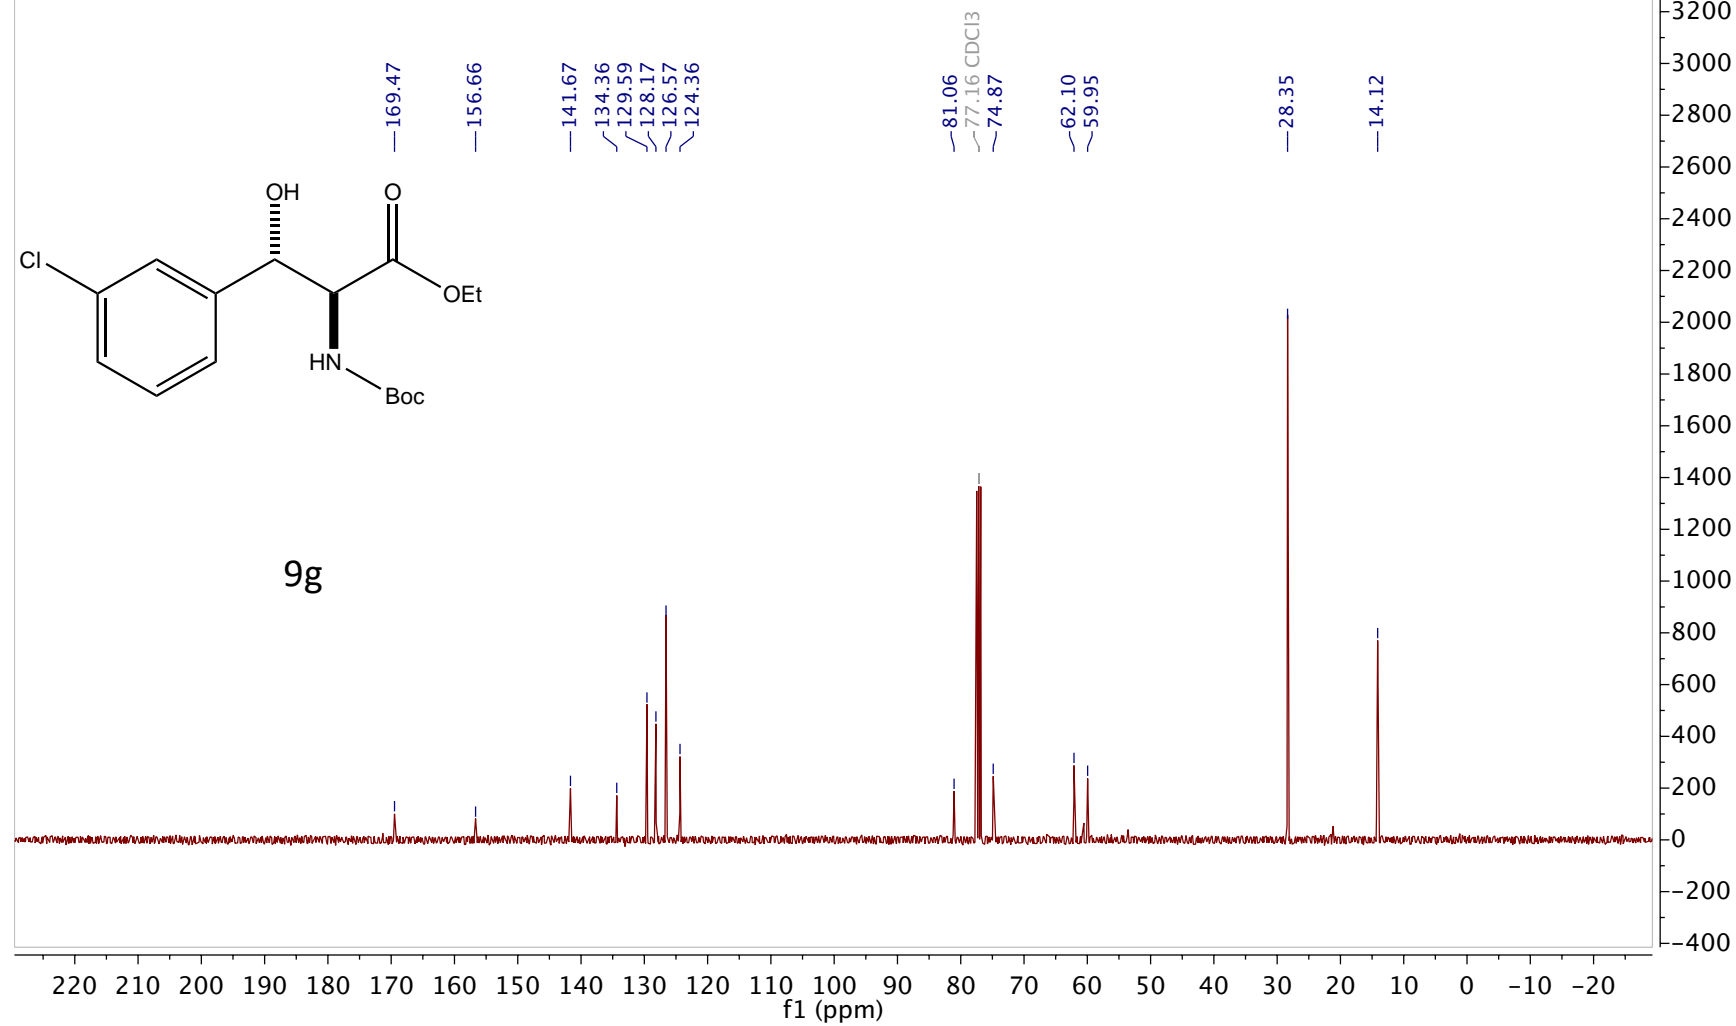



Dec26-2020-2-LS892(P) C8-D7.1.fid  
Instrument AVH400  
Group MGM  
Chemist Liban Saney  
Project Account Code DM7300  
h1acq.crl CDCl3 {C:\NMR} mgmgrp 2

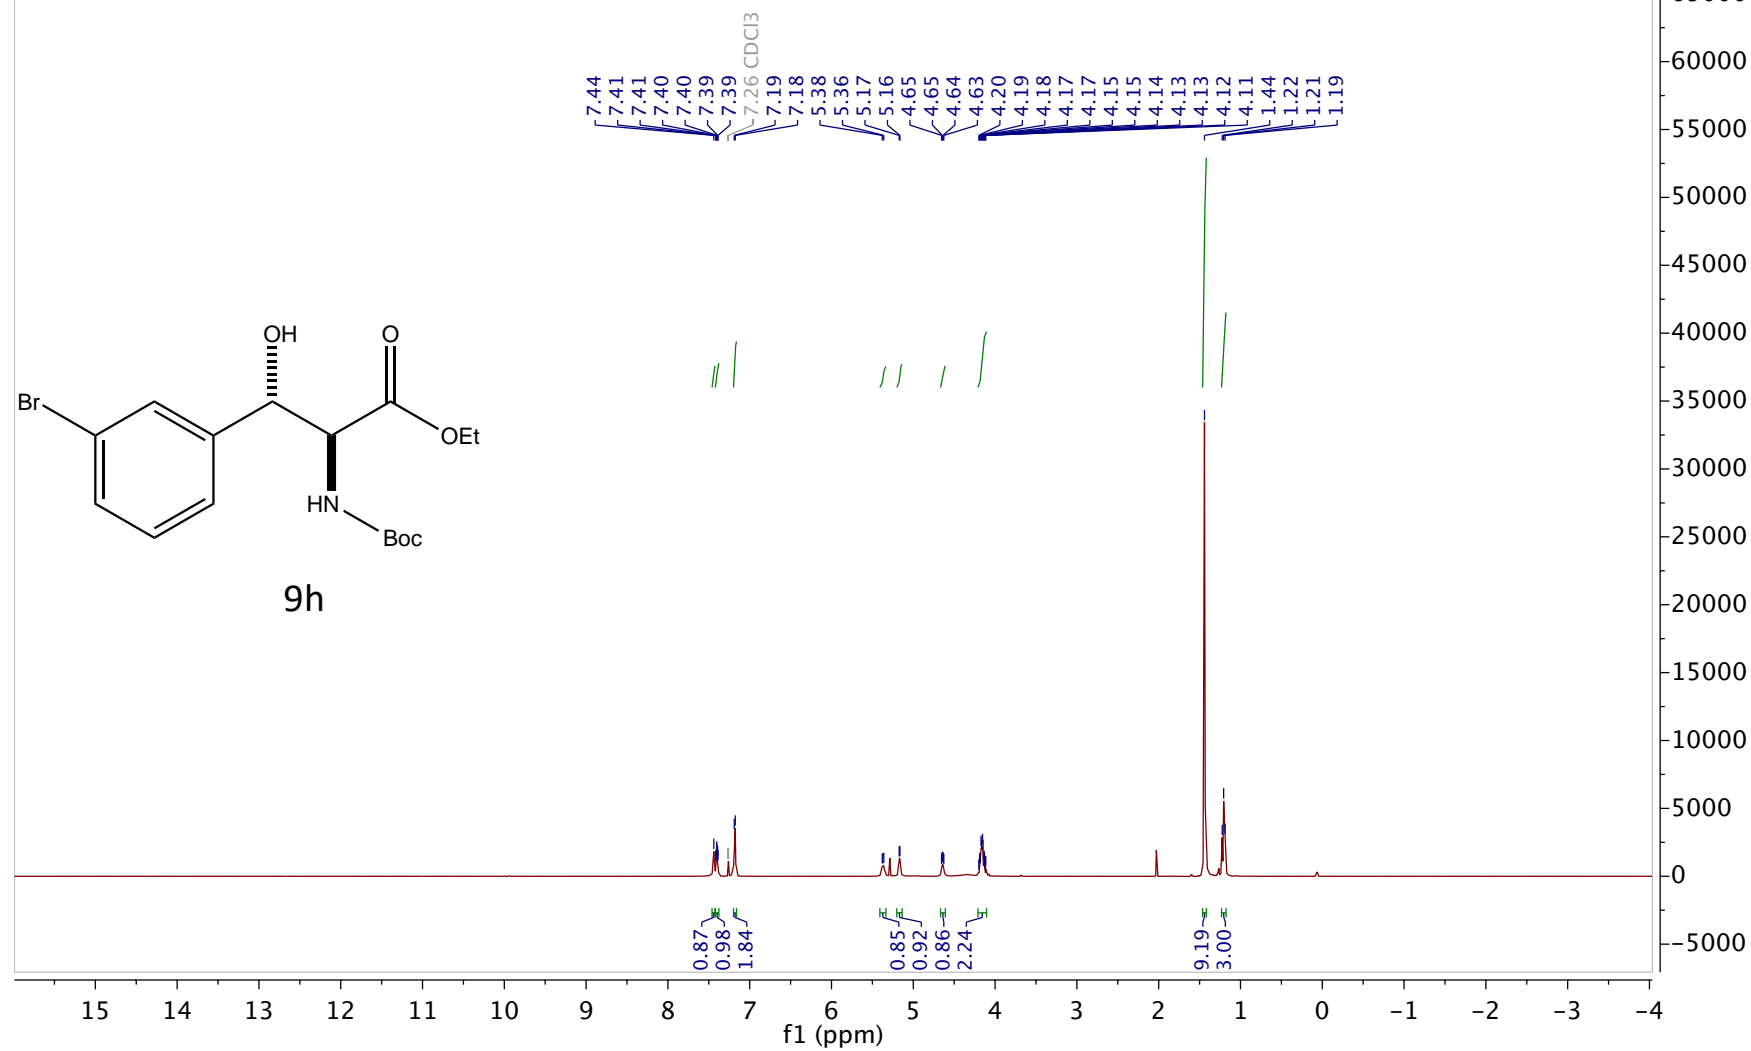

Dec26-2020-2-LS892(P) C8-D7.4.fid  
Instrument AVH400  
Group MGM  
Chemist Liban Saney  
Project Account Code DM7300  
c13acq\_512.crl CDCl3 {C:\NMR} mgmgrp 2

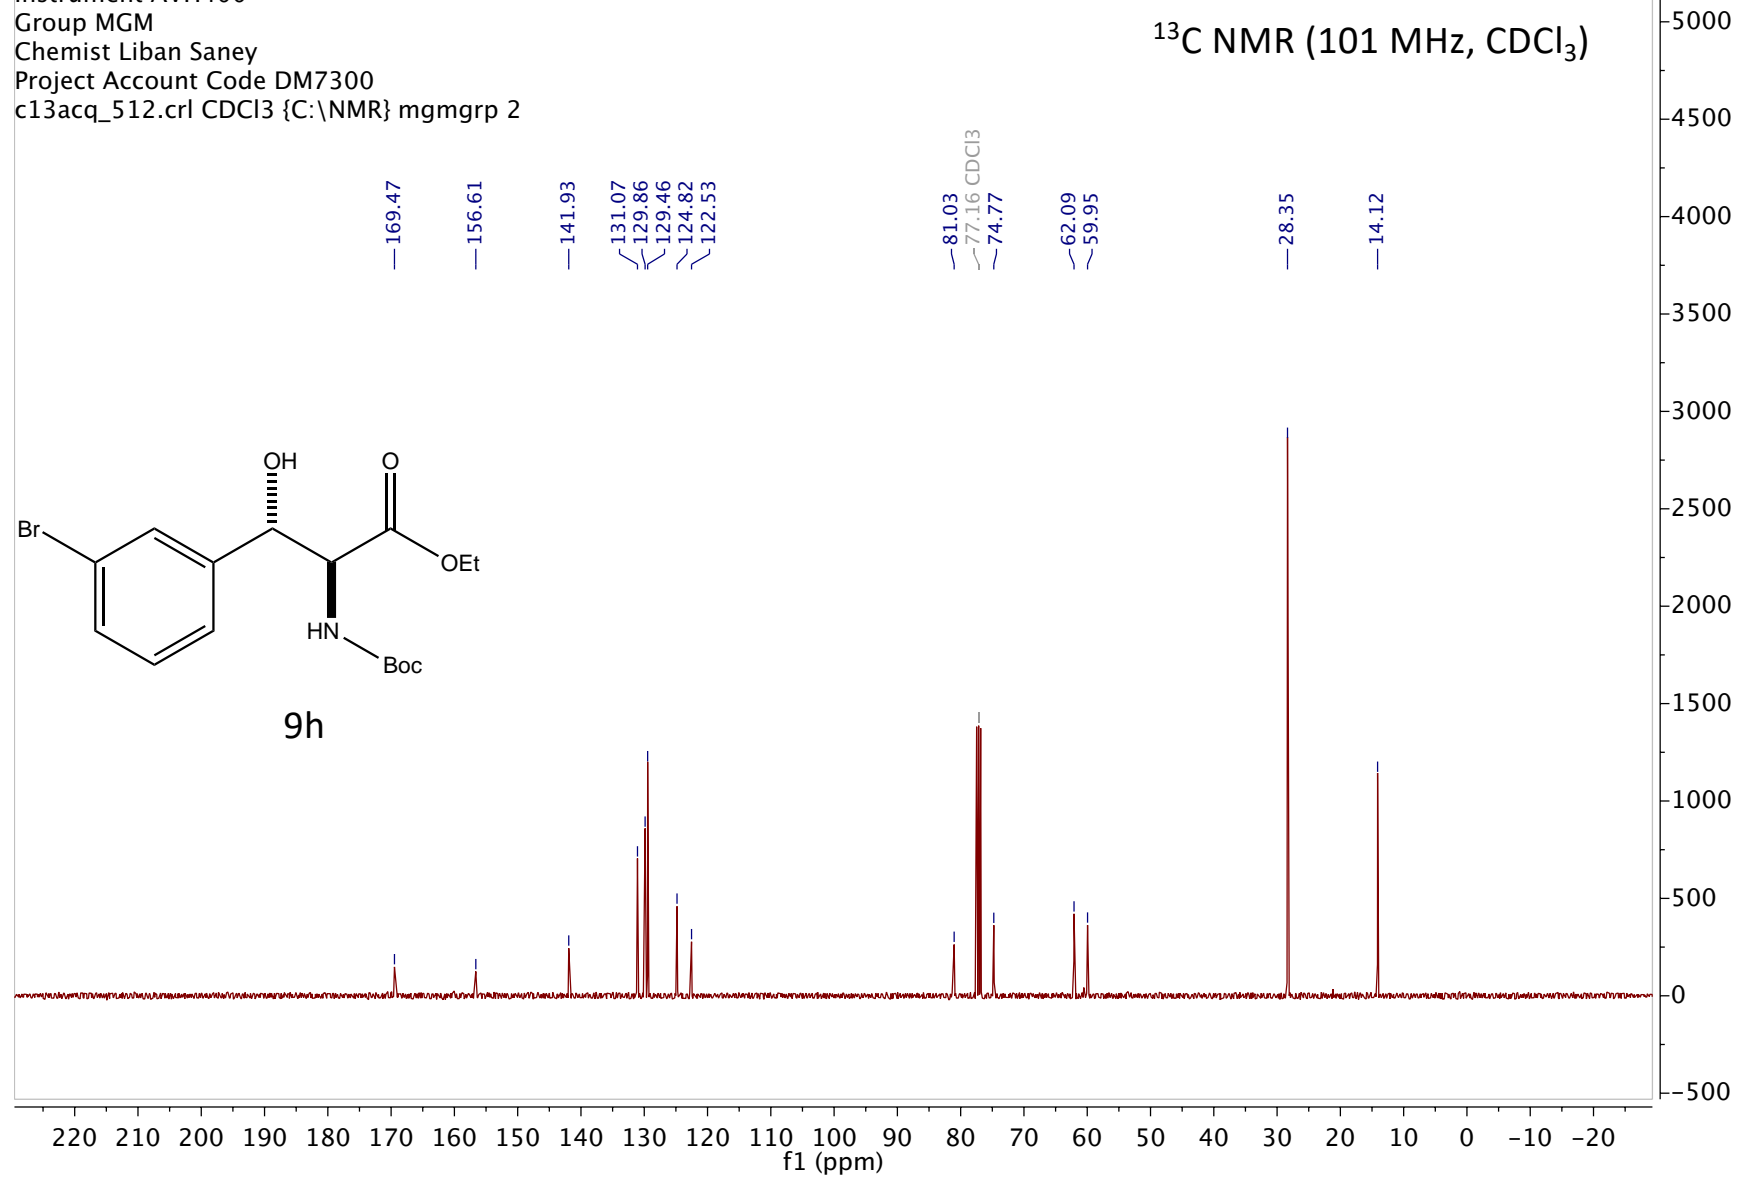

Dec26-2020-1-LS891(P) D2-E3.1.fid  
Instrument AVH400  
Group MGM  
Chemist Liban Saney  
Project Account Code DM7300  
h1acq.crl CDCl3 {C:\NMR} mgmgrp 1

<sup>1</sup>H NMR (400 MHz, CDCl<sub>3</sub>)

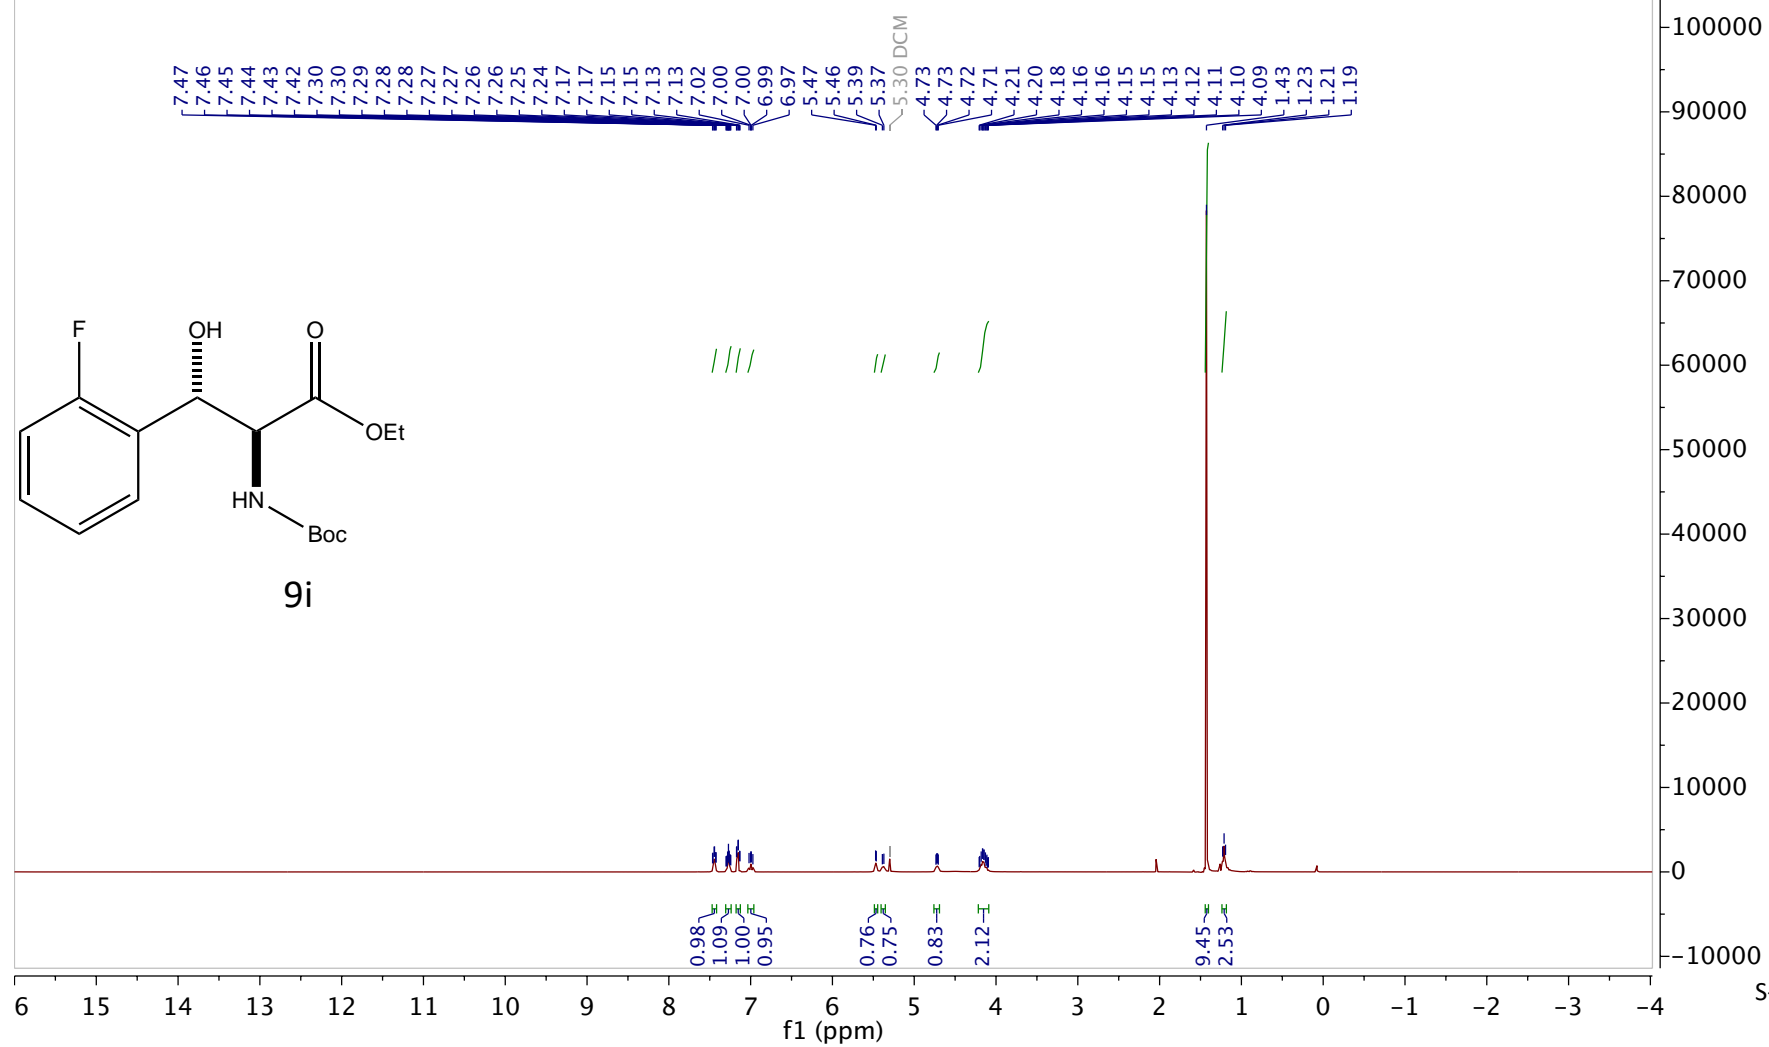

Dec26-2020-1-LS891(P) D2-E3.4.fid  
Instrument AVH400  
Group MGM  
Chemist Liban Saney  
Project Account Code DM7300  
c13acq\_512.crl CDCl3 {C:\NMR} mgmgrp 1

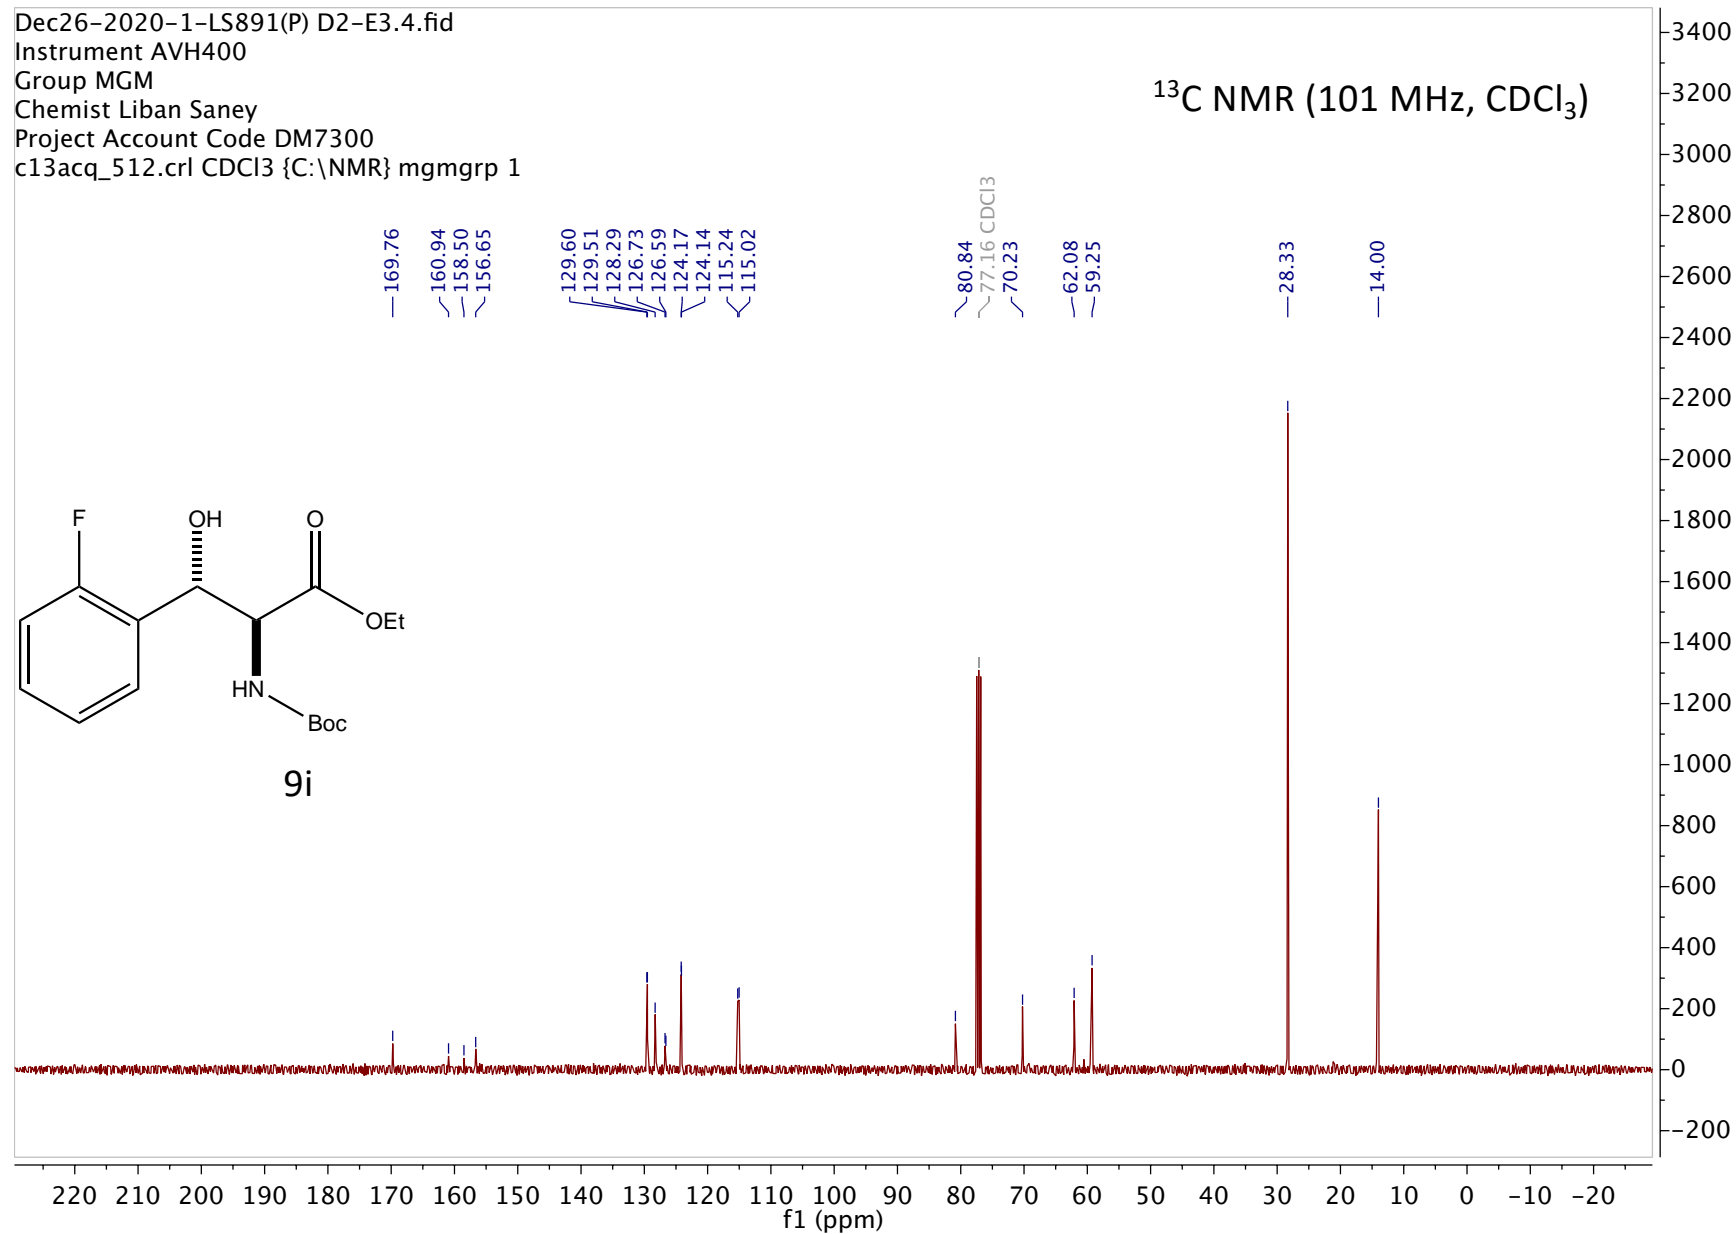

Dec26-2020-1-LS891(P) D2-E3.7.fid  
Instrument AVH400  
Group MGM  
Chemist Liban Saney  
Project Account Code DM7300  
f19dec\_256.crl CDCl3 {C:\NMR} mgmgrp 1

$^{19}\text{F}$  NMR (377 MHz,  $\text{CDCl}_3$ )

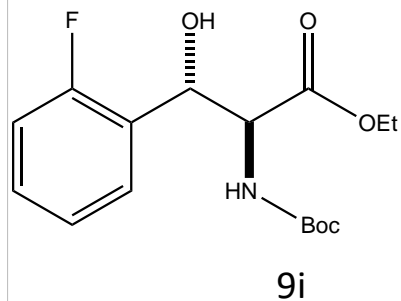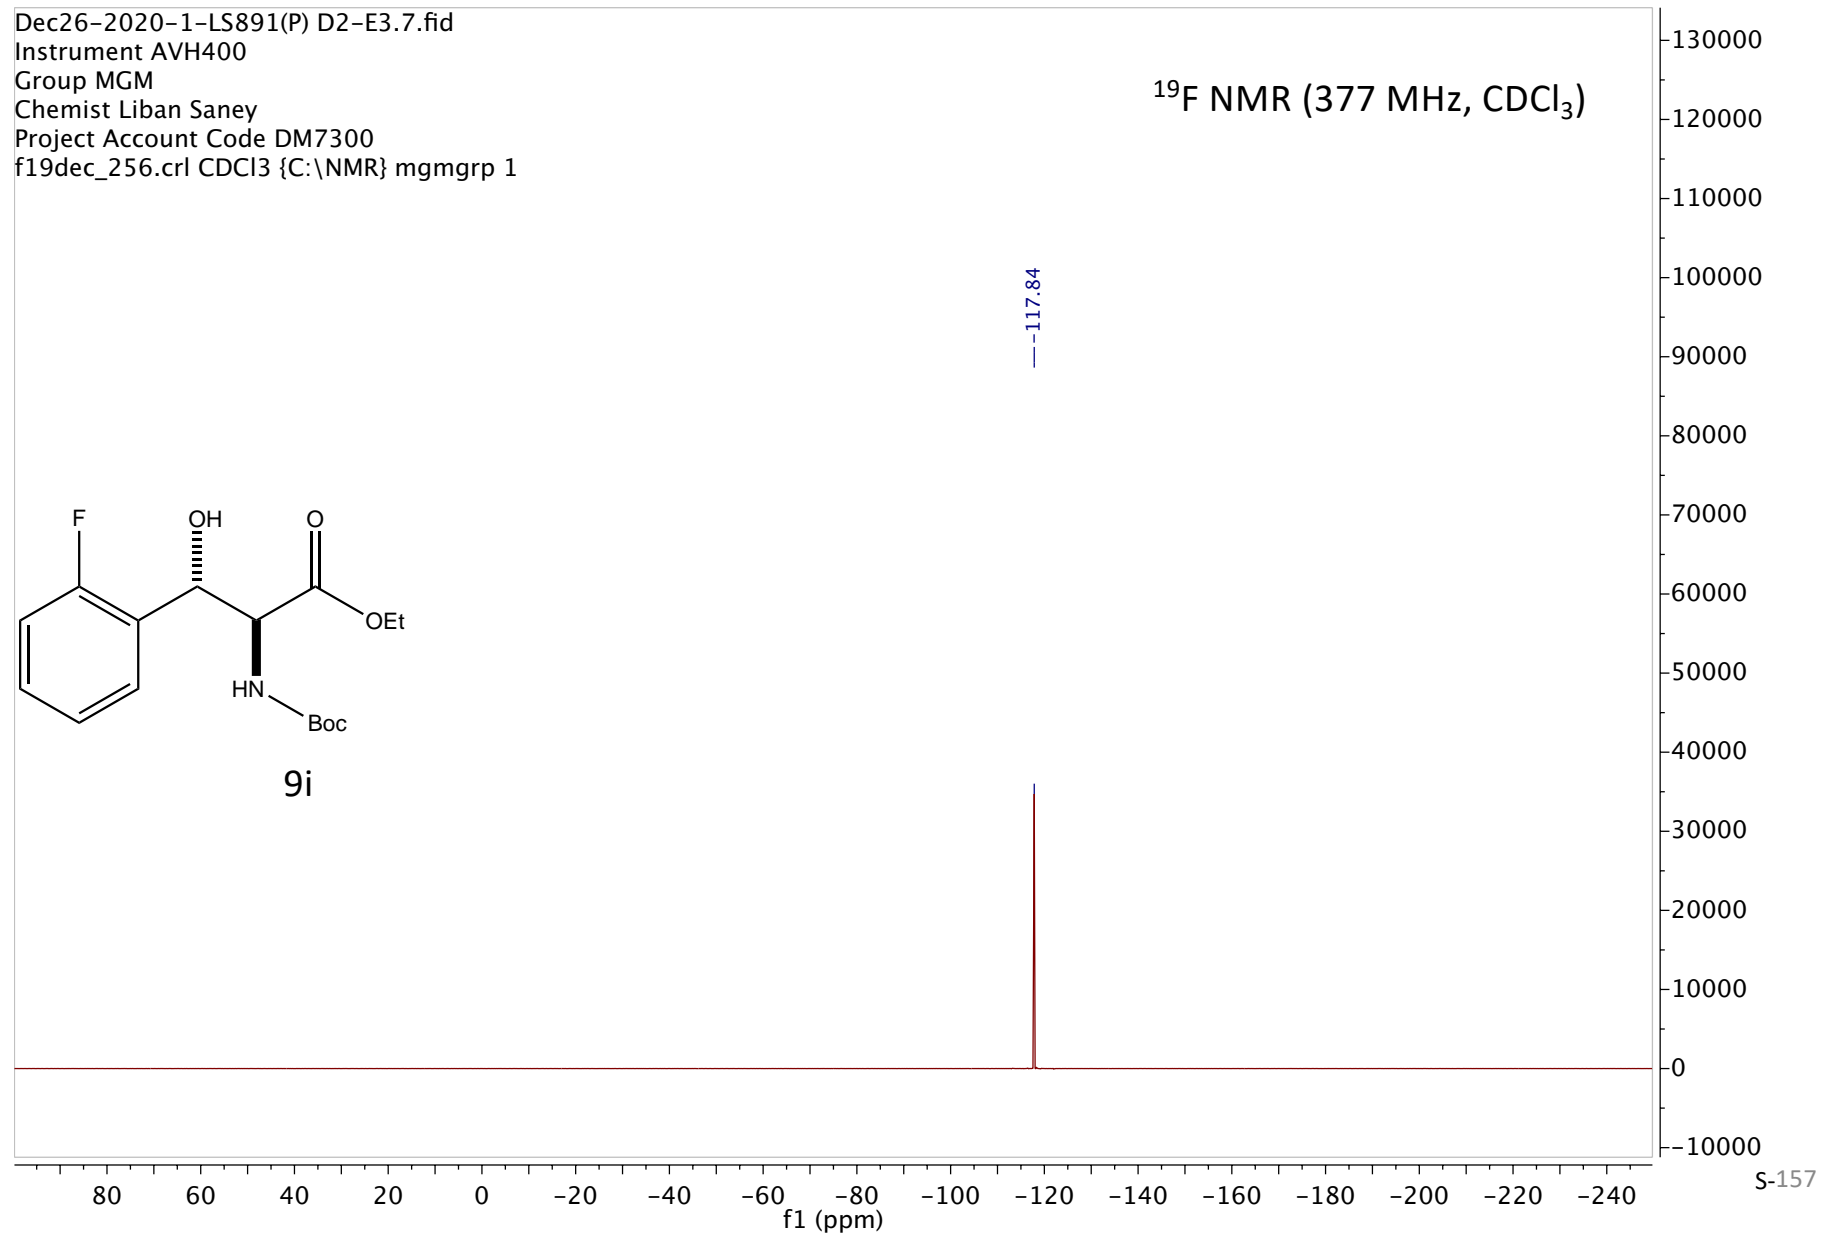

Jan13-2021-53-LS901(P) B6-C12.1.fid  
Instrument AVH400  
Group MGM  
Chemist Liban Saney  
Project Account Code DM7300  
h1acq.crl CDCl3 {C:\NMR} mgmgrp 53

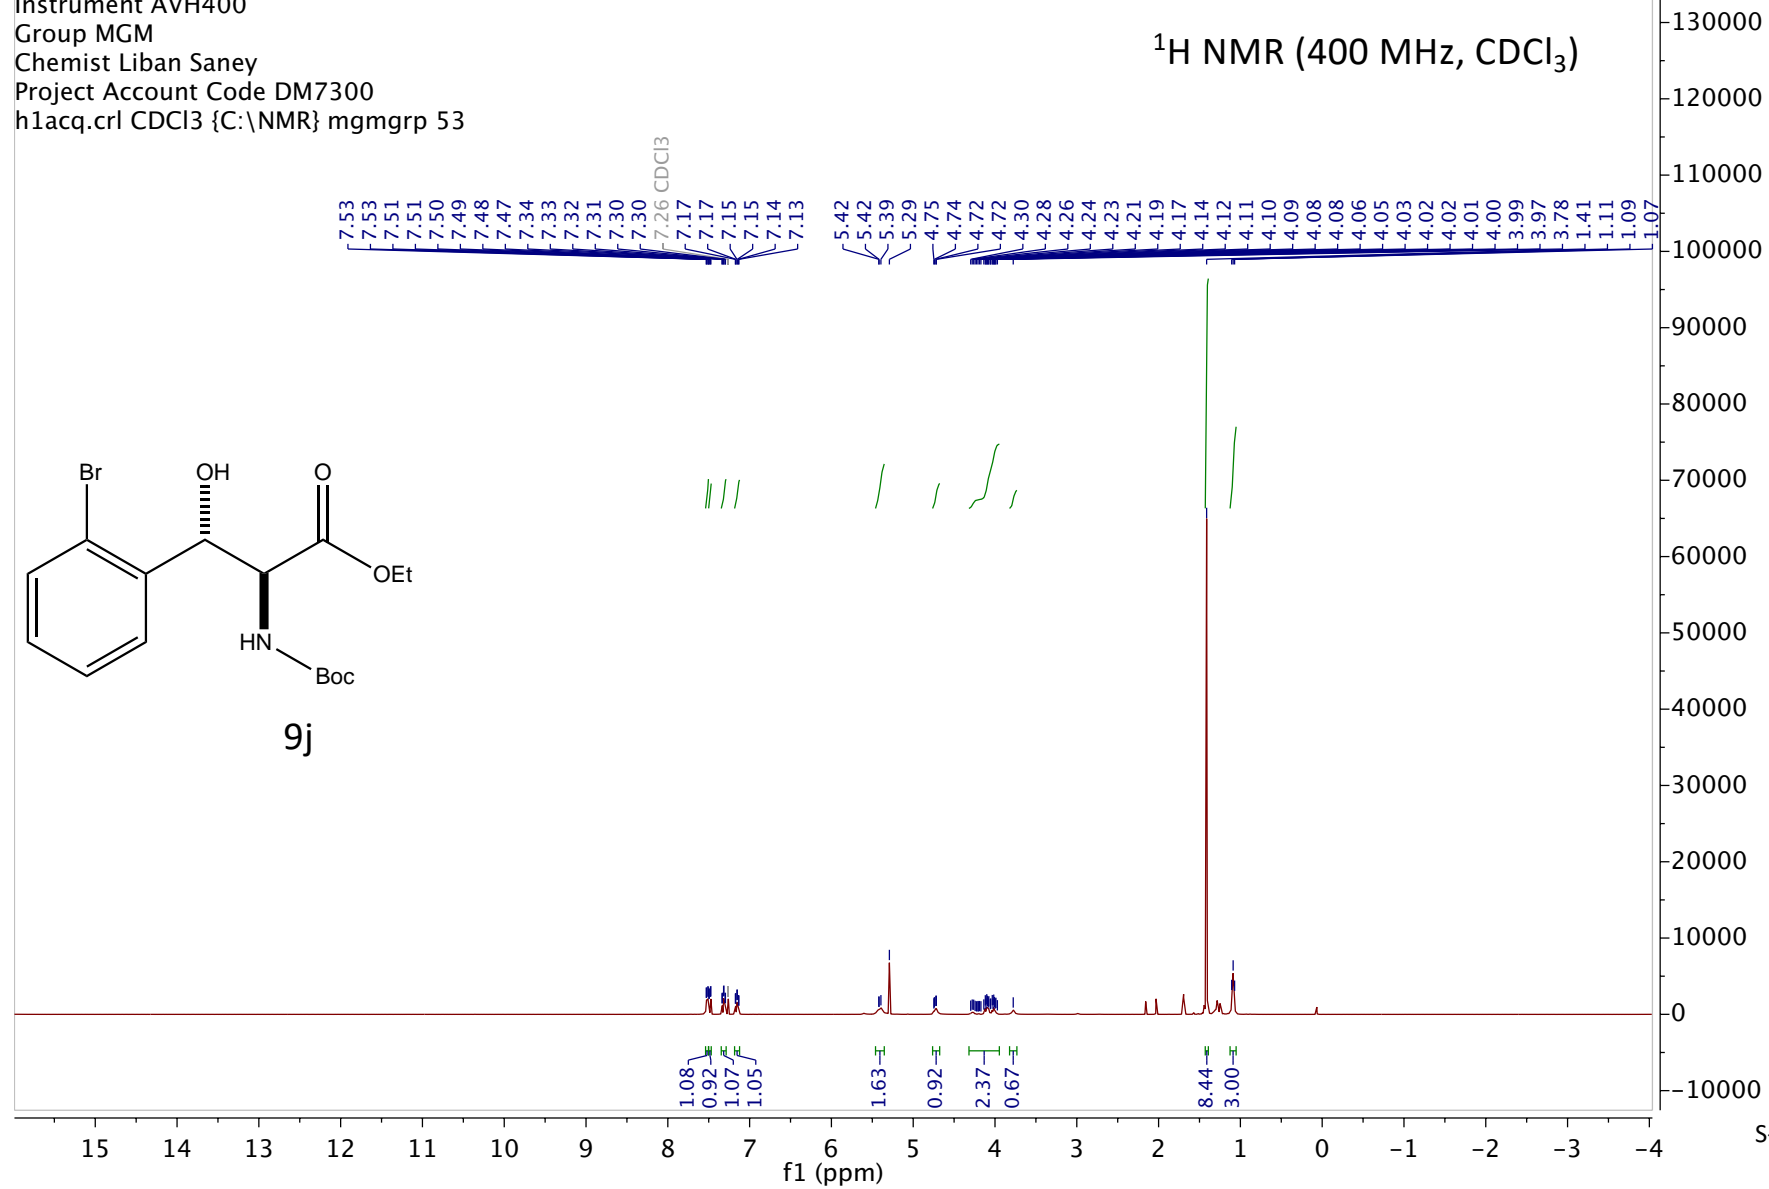

Jan13-2021-53-LS901(P) B6-C12.4.fid  
Instrument AVH400  
Group MGM  
Chemist Liban Saney  
Project Account Code DM7300  
c13acq\_512.crl CDCl3 {C:\NMR} mgmgrp 53

<sup>13</sup>C NMR (101 MHz, CDCl<sub>3</sub>)

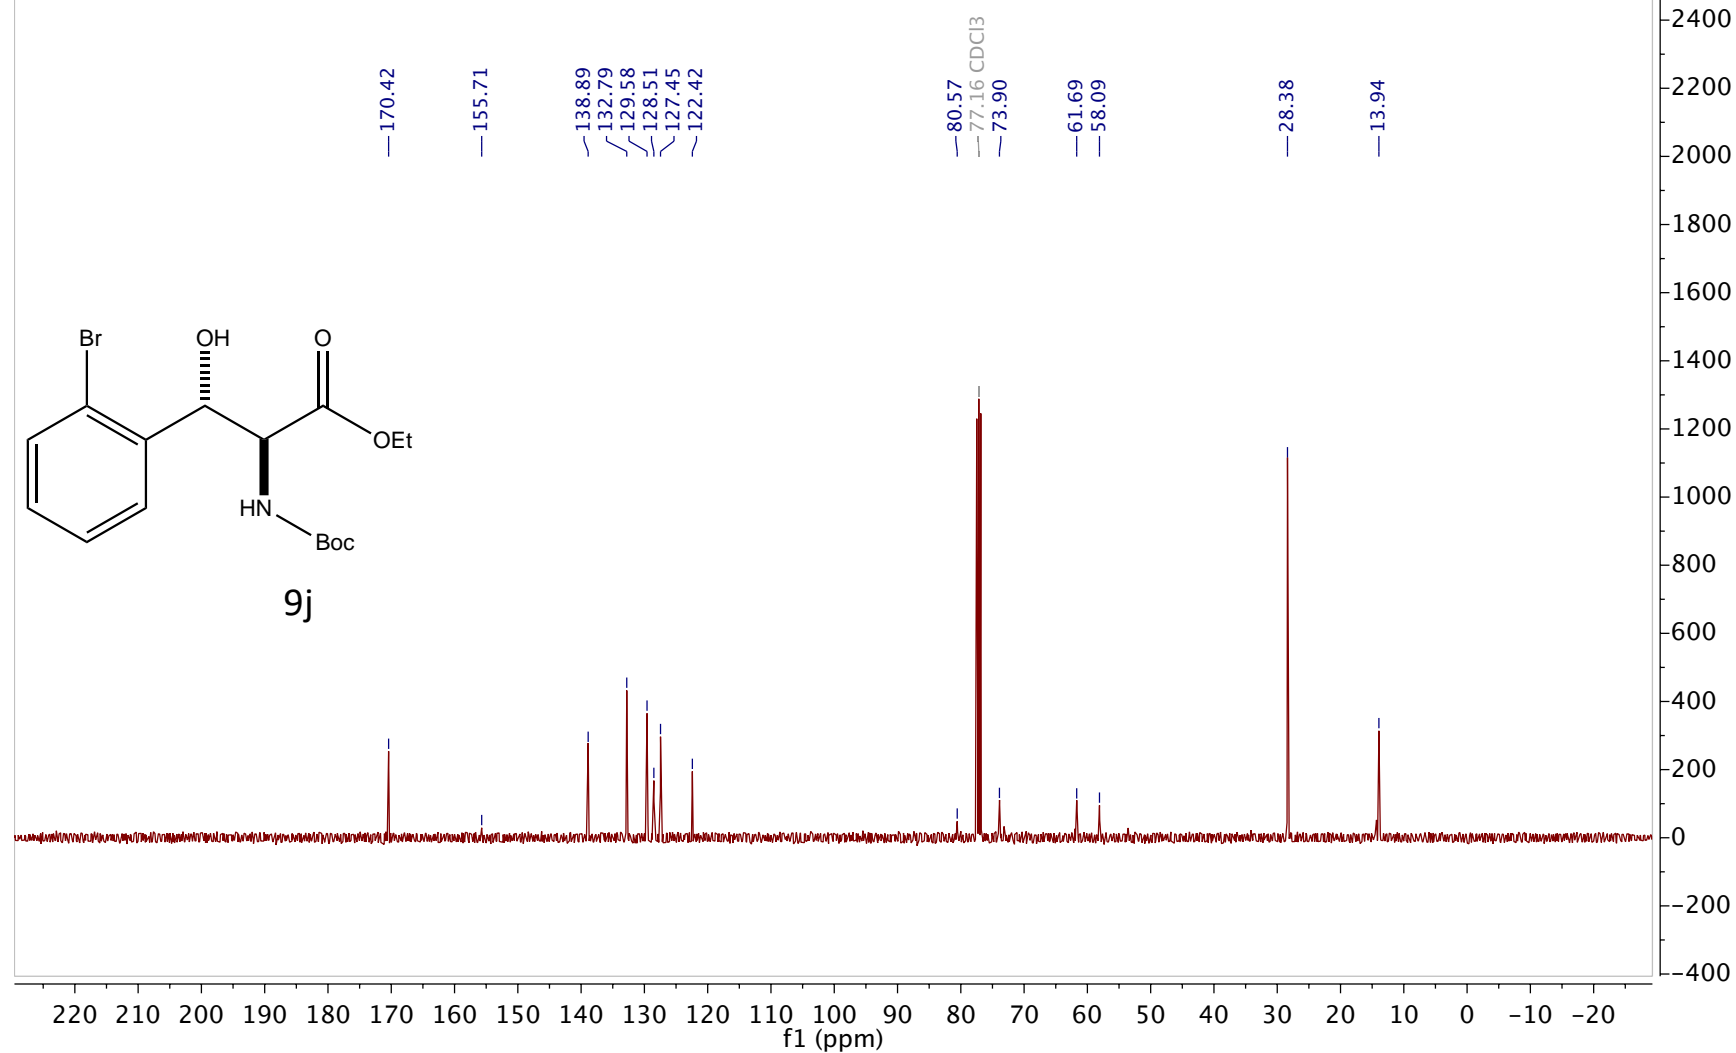

Jan23-2021-28-LS913(P) J8-N1.1.fid  
Instrument AVH400  
Group MGM  
Chemist Liban Saney  
Project Account Code DM7300  
h1acq.crl CDCl3 {C:\NMR} mgmgrp 28

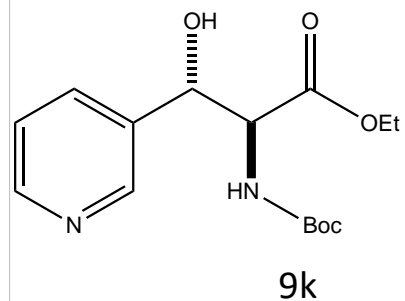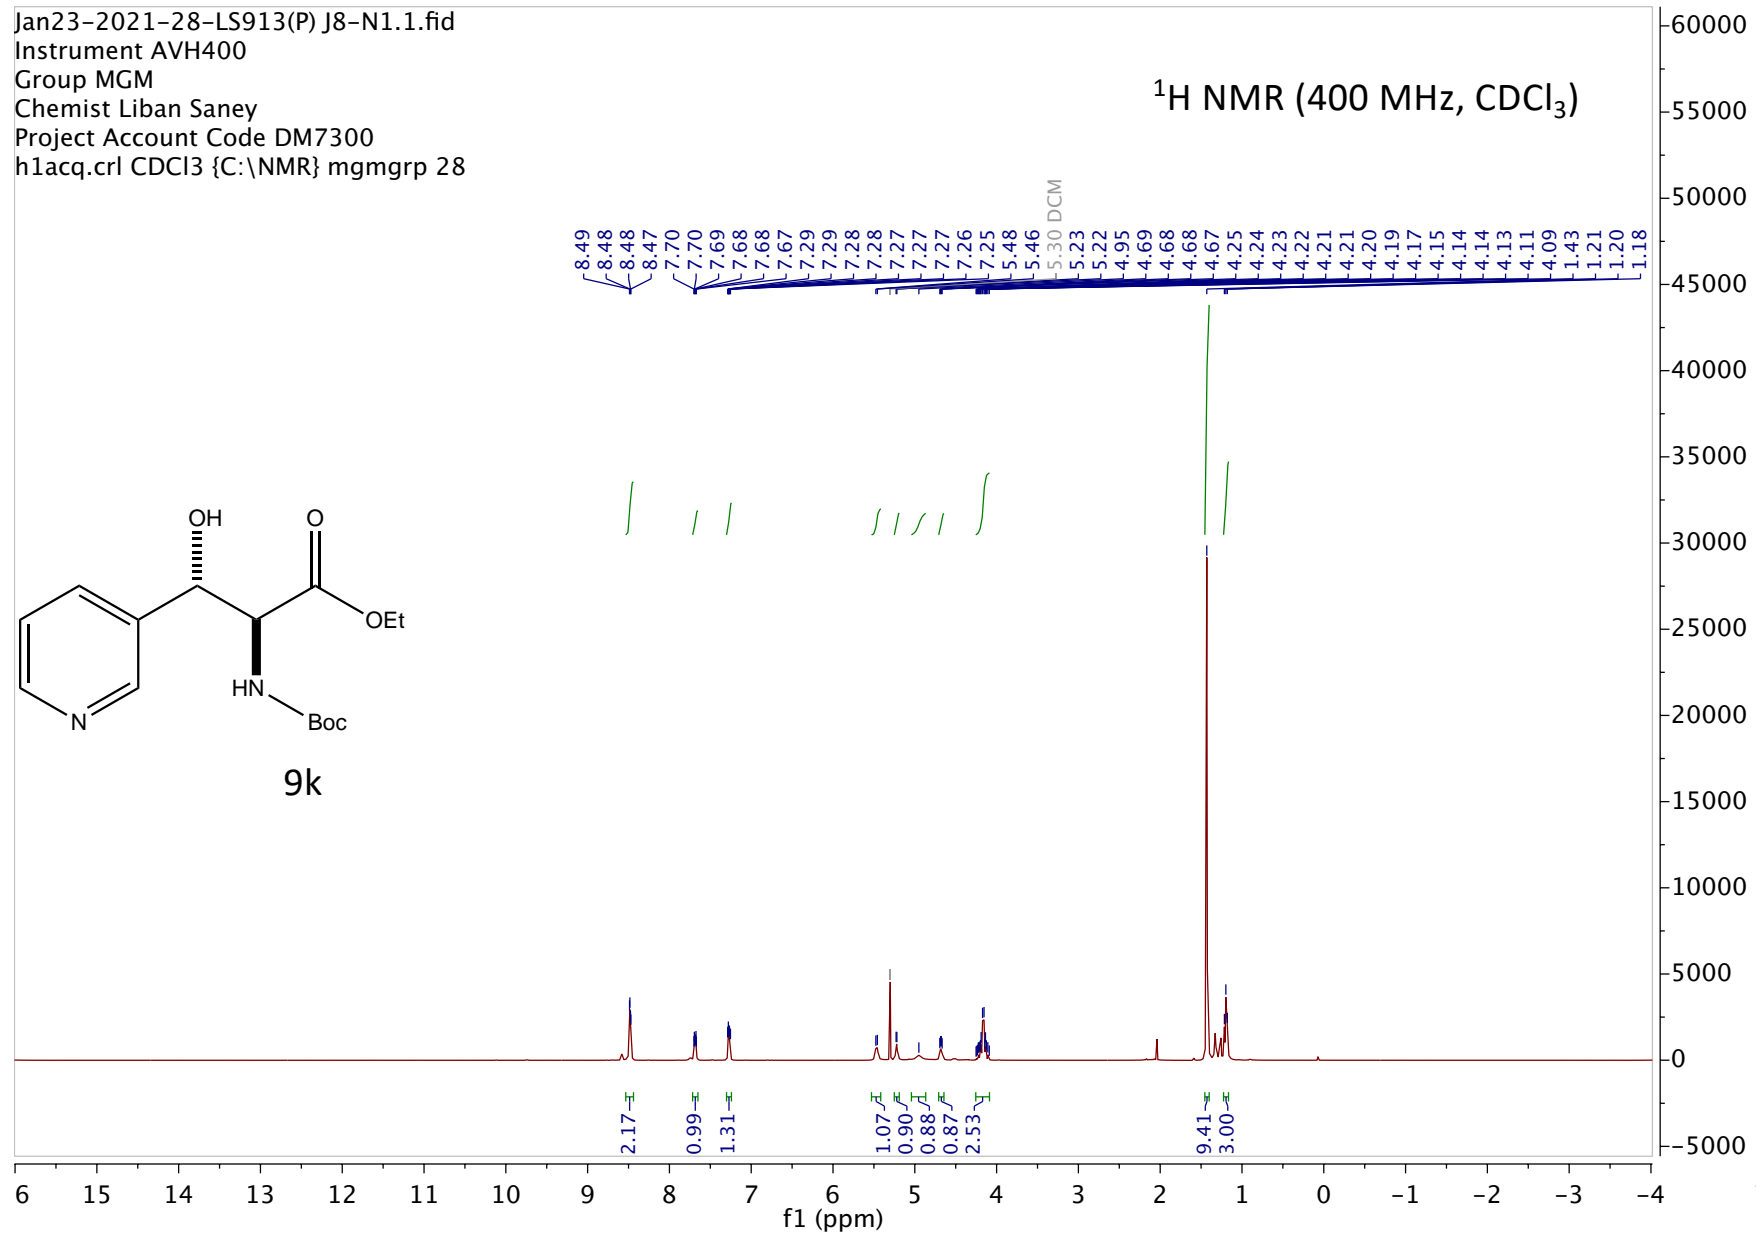



Jan23-2021-28-LS913(P) J8-N1.4.fid  
Instrument AVH400  
Group MGM  
Chemist Liban Saney  
Project Account Code DM7300  
c13acq\_512.crl CDCl3 {C:\NMR} mgmgrp 28

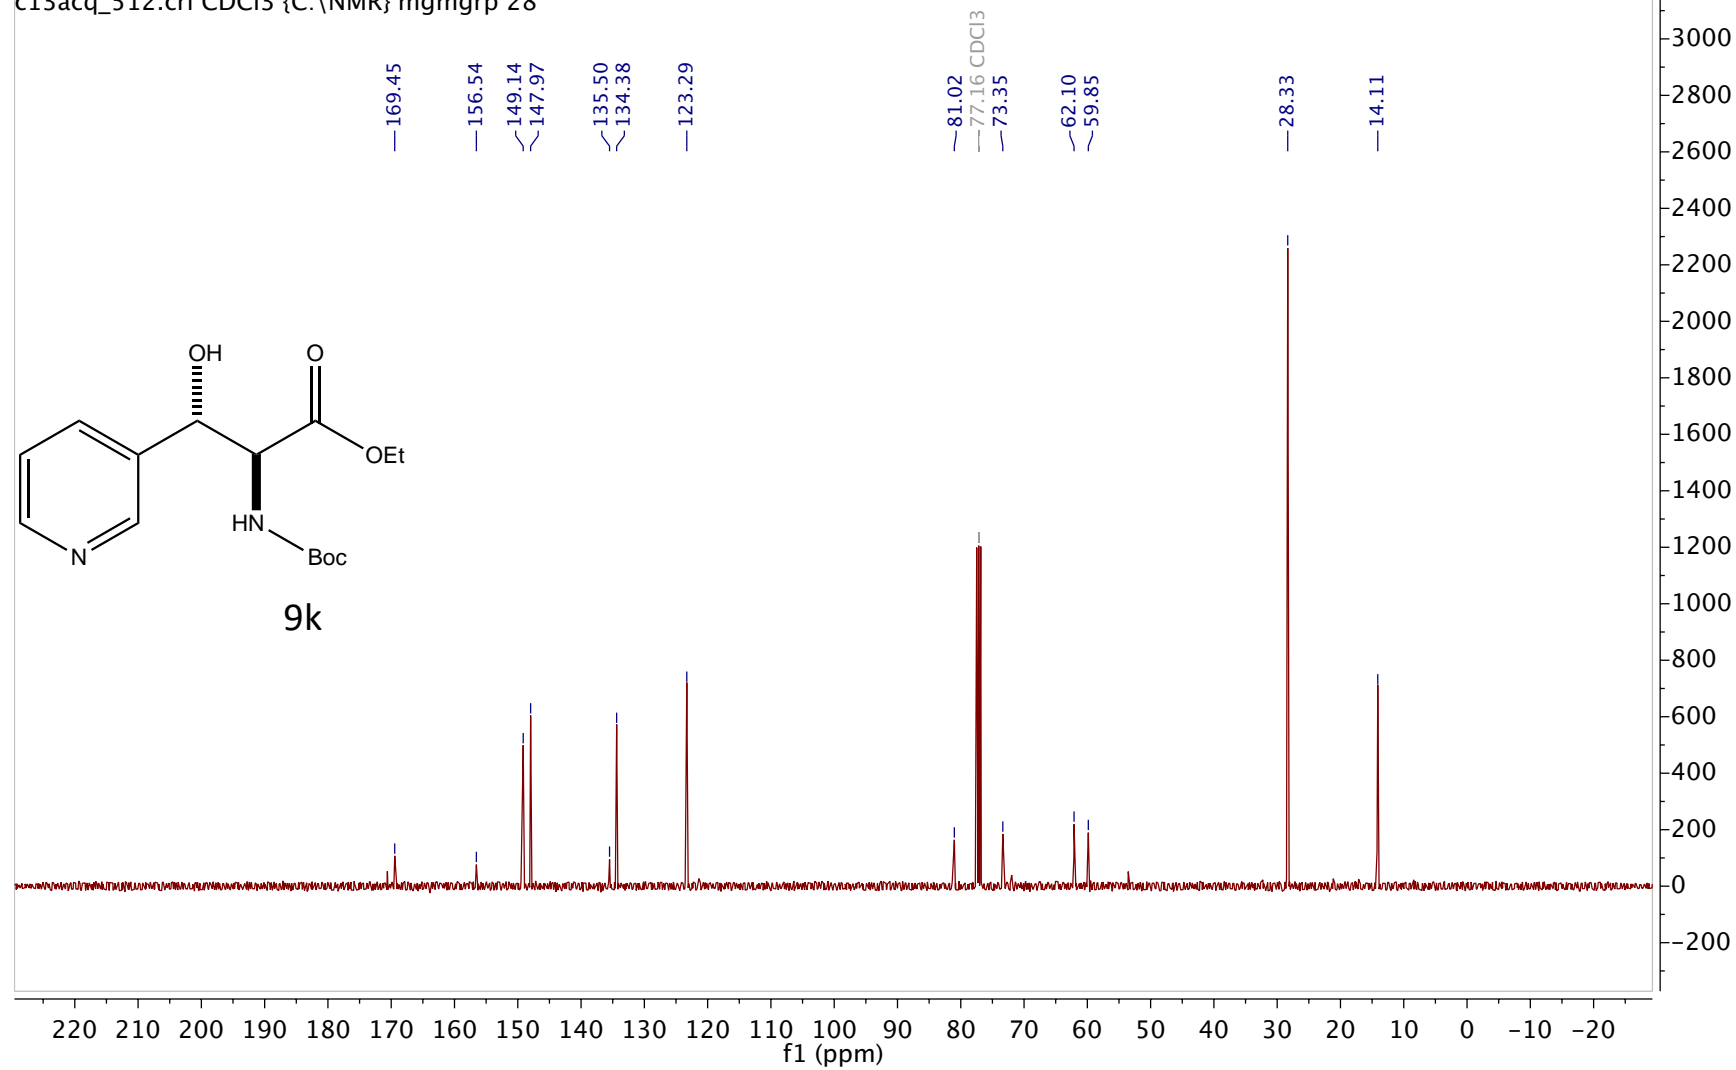

Jan13-2021-54-LS902(P) C4-D1.1.fid  
Instrument AVH400  
Group MGM  
Chemist Liban Saney  
Project Account Code DM7300  
h1acq.crl CDCl3 {C:\NMR} mgmgrp 54

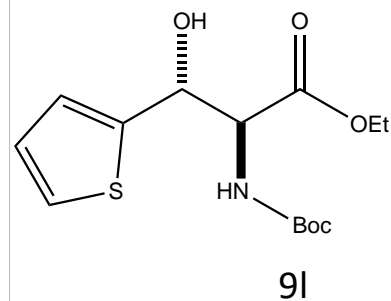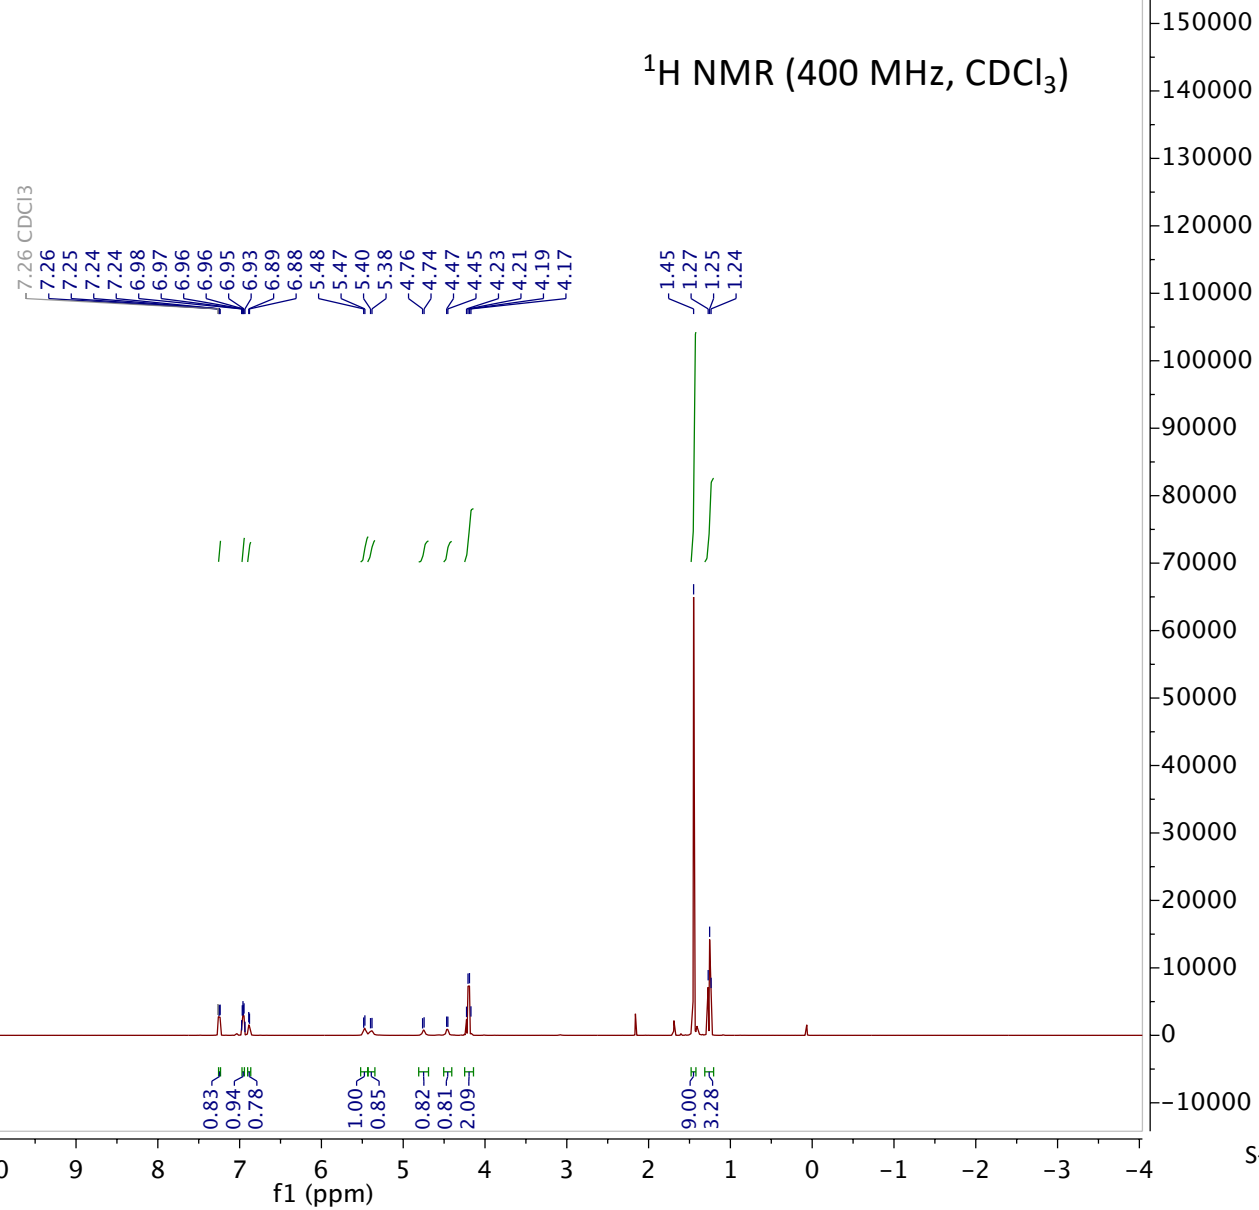

Jan13-2021-54-LS902(P) C4-D1.4.fid  
Instrument AVH400  
Group MGM  
Chemist Liban Saney  
Project Account Code DM7300  
c13acq\_512.crl CDCl3 {C:\NMR} mgmgrp 54

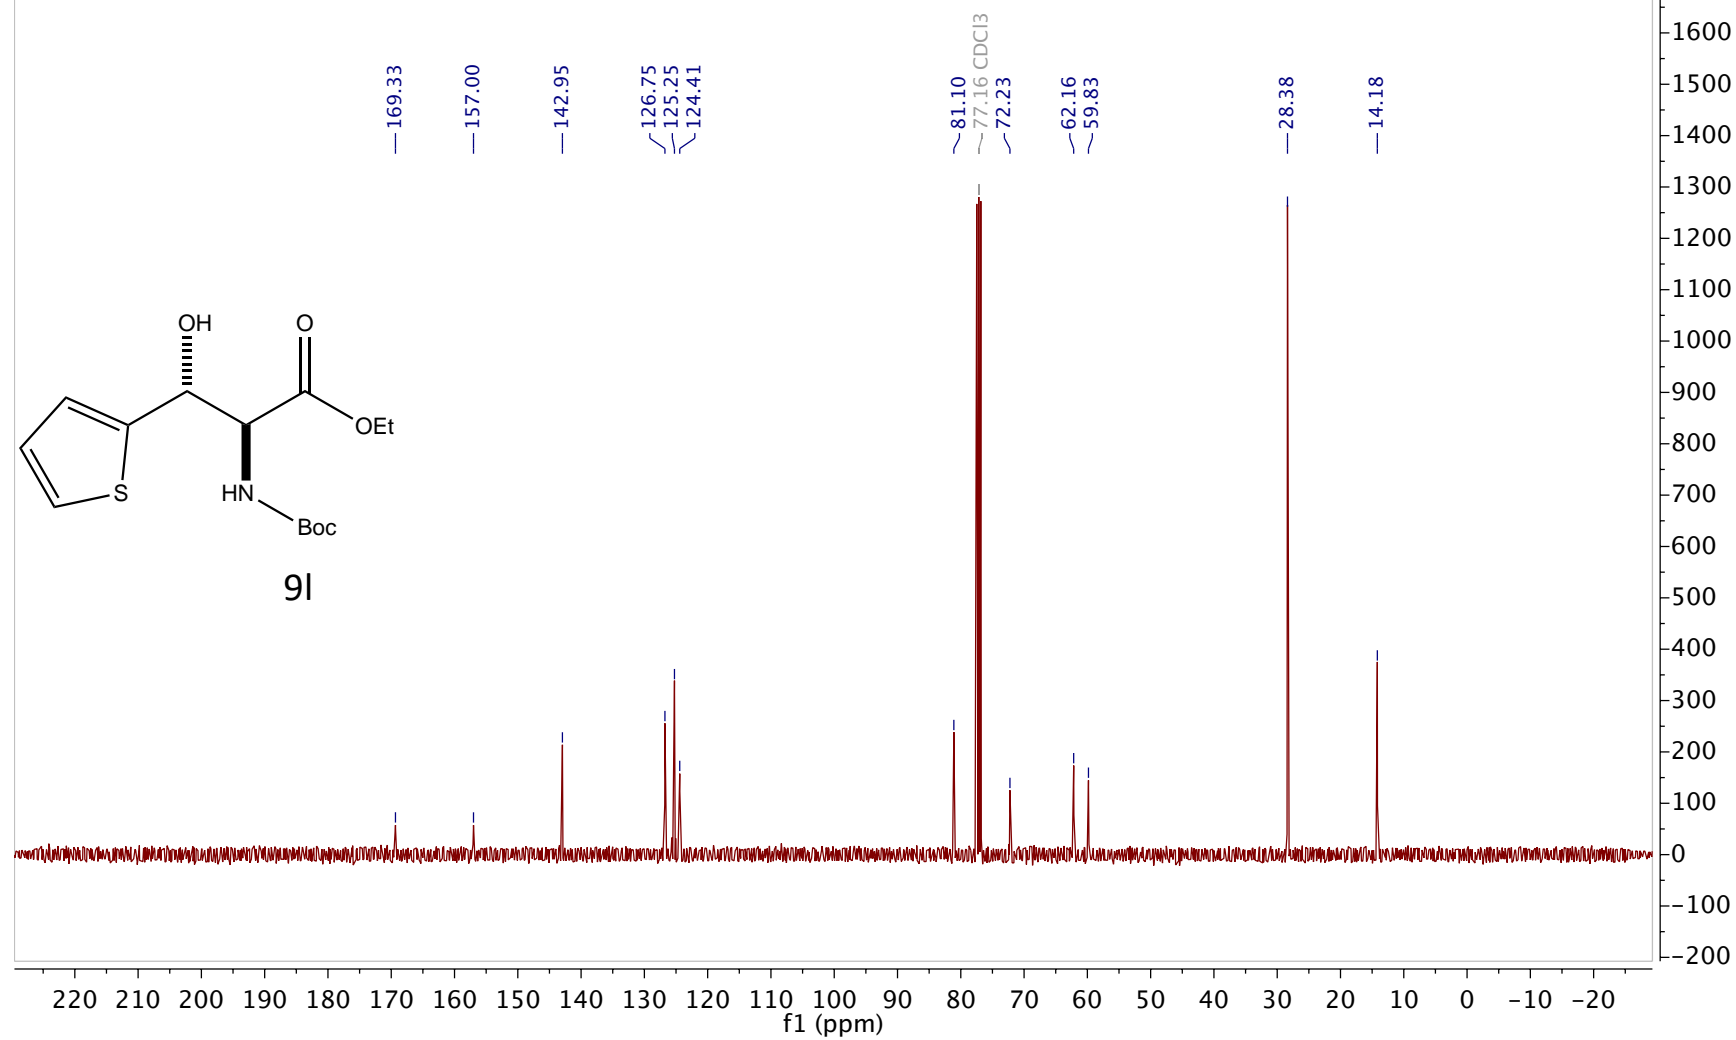

Mar27-2019-59-LS356(C).1.fid  
Instrument AVF400  
Chemist Liban Saney  
Group MGM  
Project Account Code DM7300  
h1acq.crl CDCl3 {C:\NMR} mgmgrp 59

<sup>1</sup>H NMR (400 MHz, CDCl<sub>3</sub>)

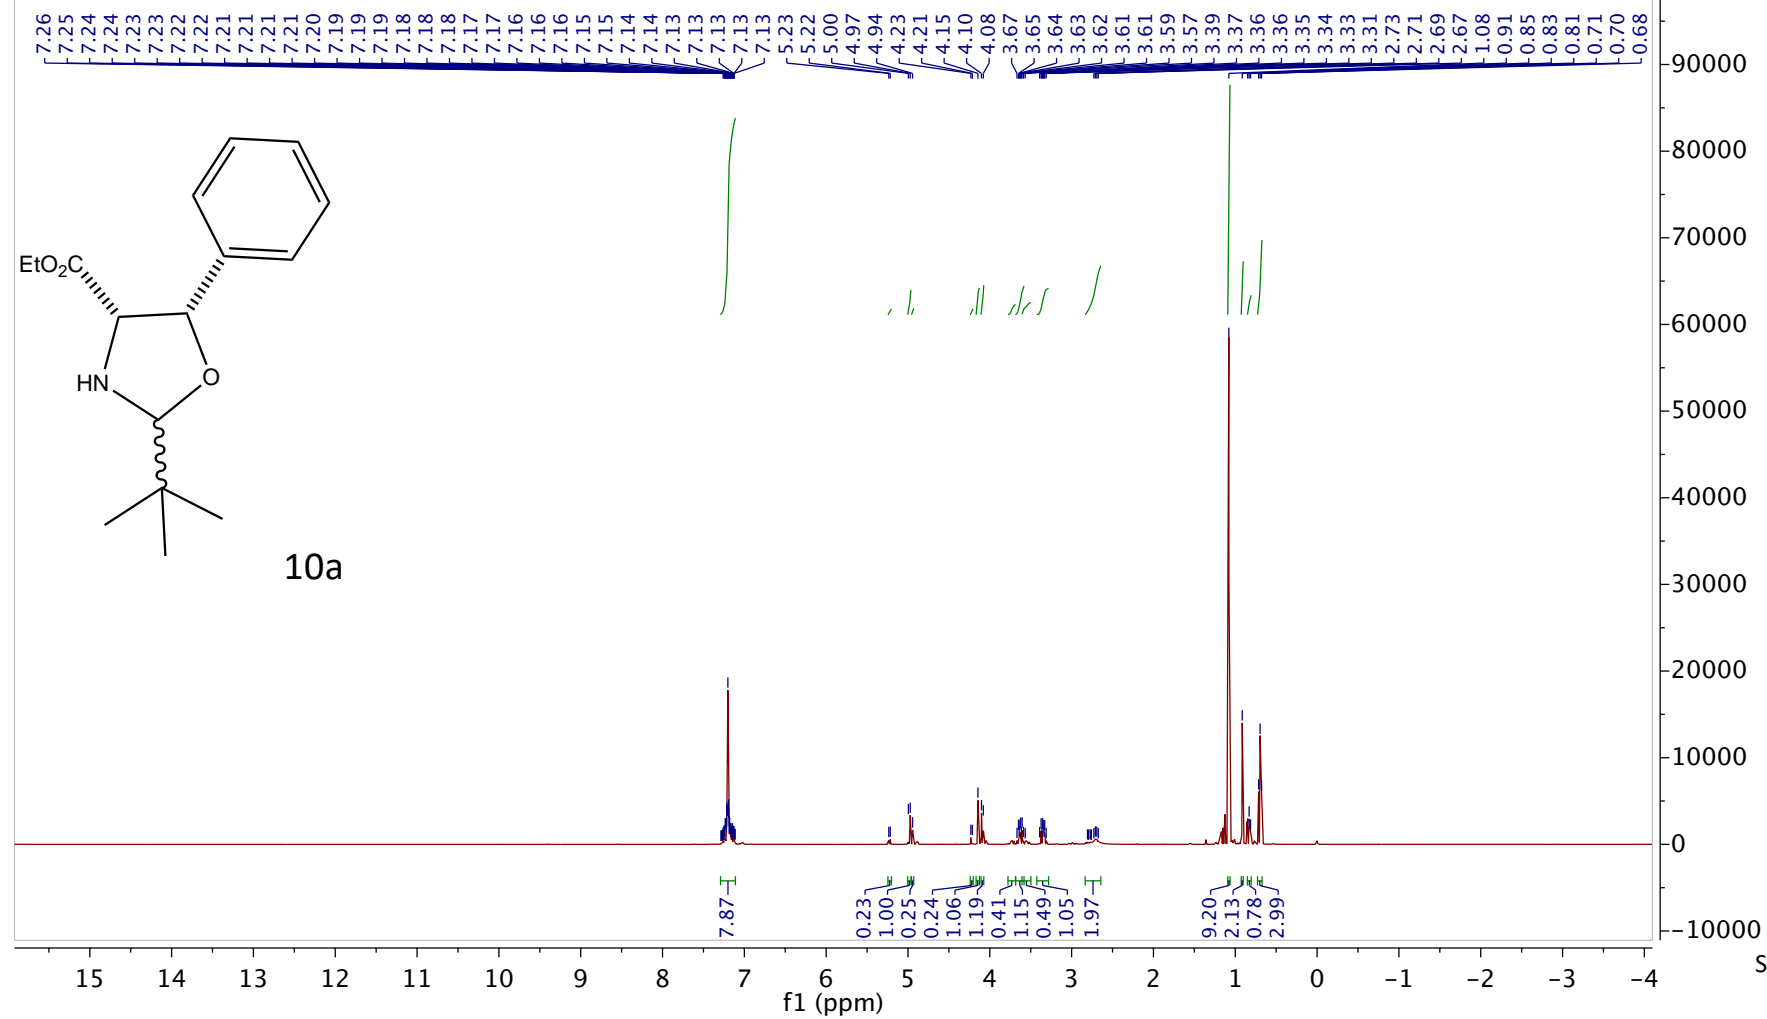

Mar27-2019-59-LS356(C).4.fid  
Instrument AVF400  
Chemist Liban Saney  
Group MGM  
Project Account Code DM7300  
c13acq\_512.crl CDCl3 {C:\NMR} mgmgrp 59

$^{13}\text{C}$  NMR (101 MHz,  $\text{CDCl}_3$ )

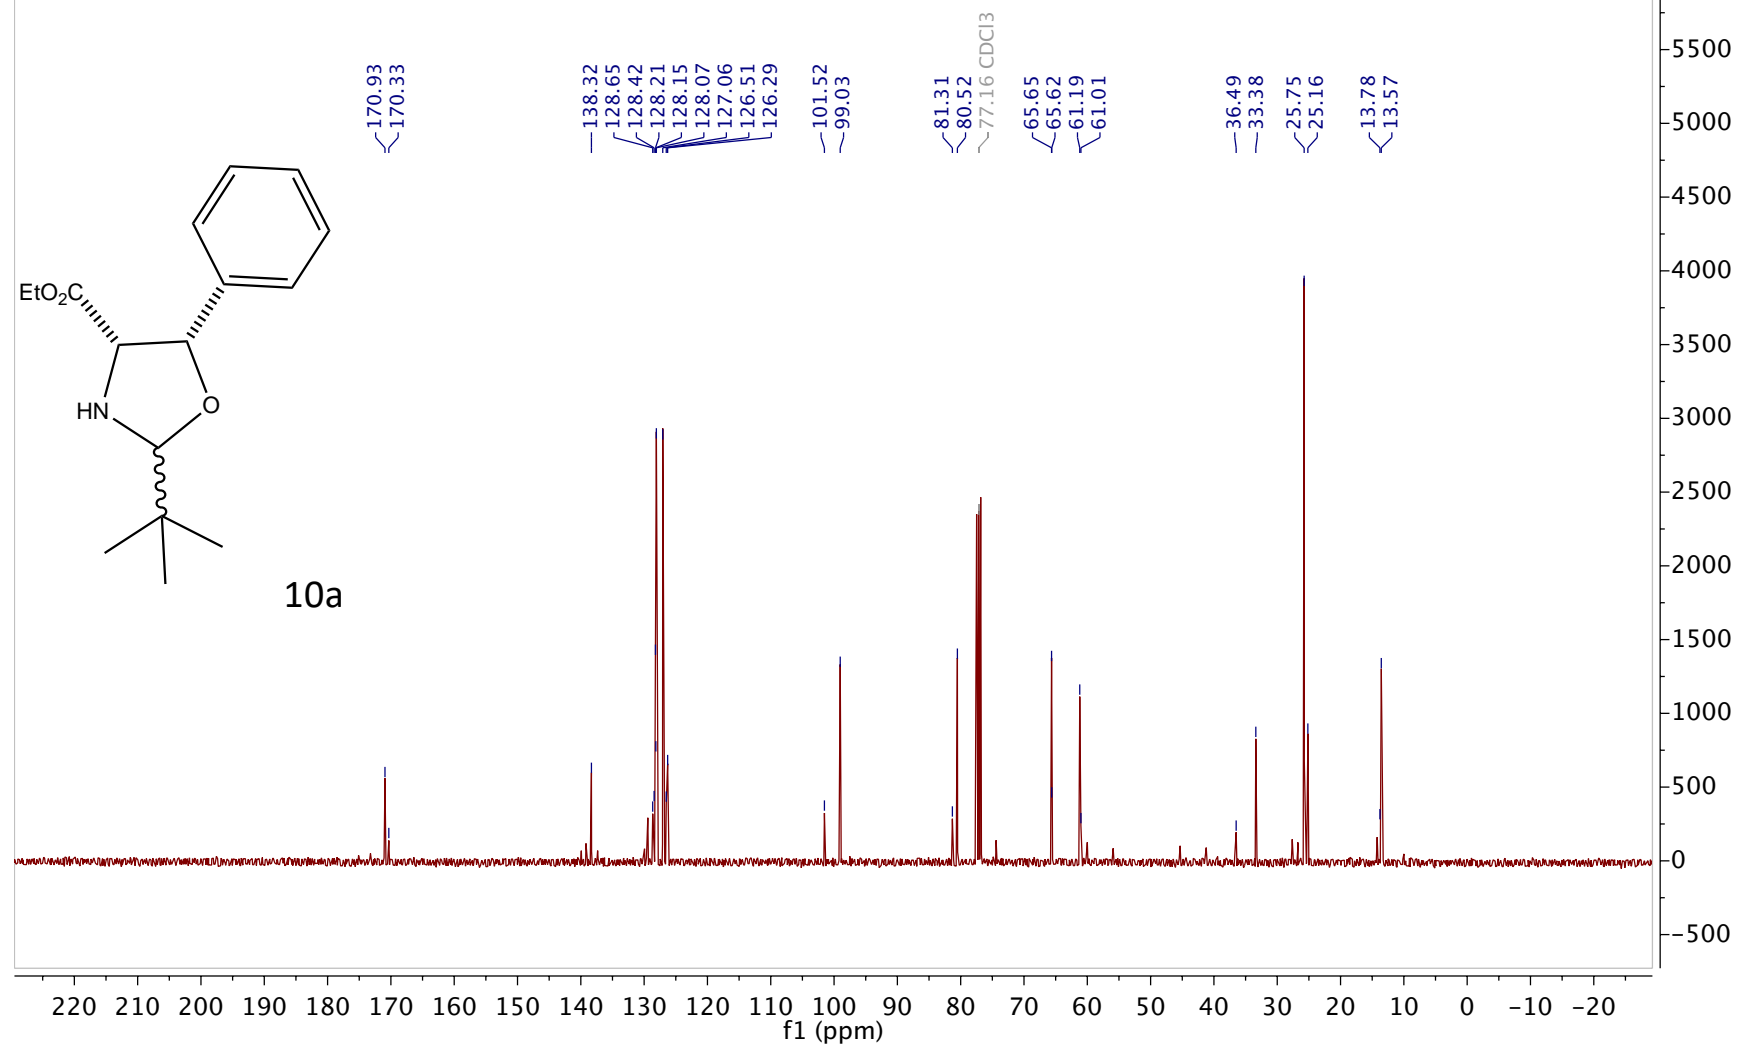

Aug24-2019-60-LS503(C).1.fid  
Instrument AVF400  
Chemist Liban Saney  
Group MGM  
Project Account Code DM7300  
h1acq.crl CDCl3 {C:\NMR} mgmgrp 60

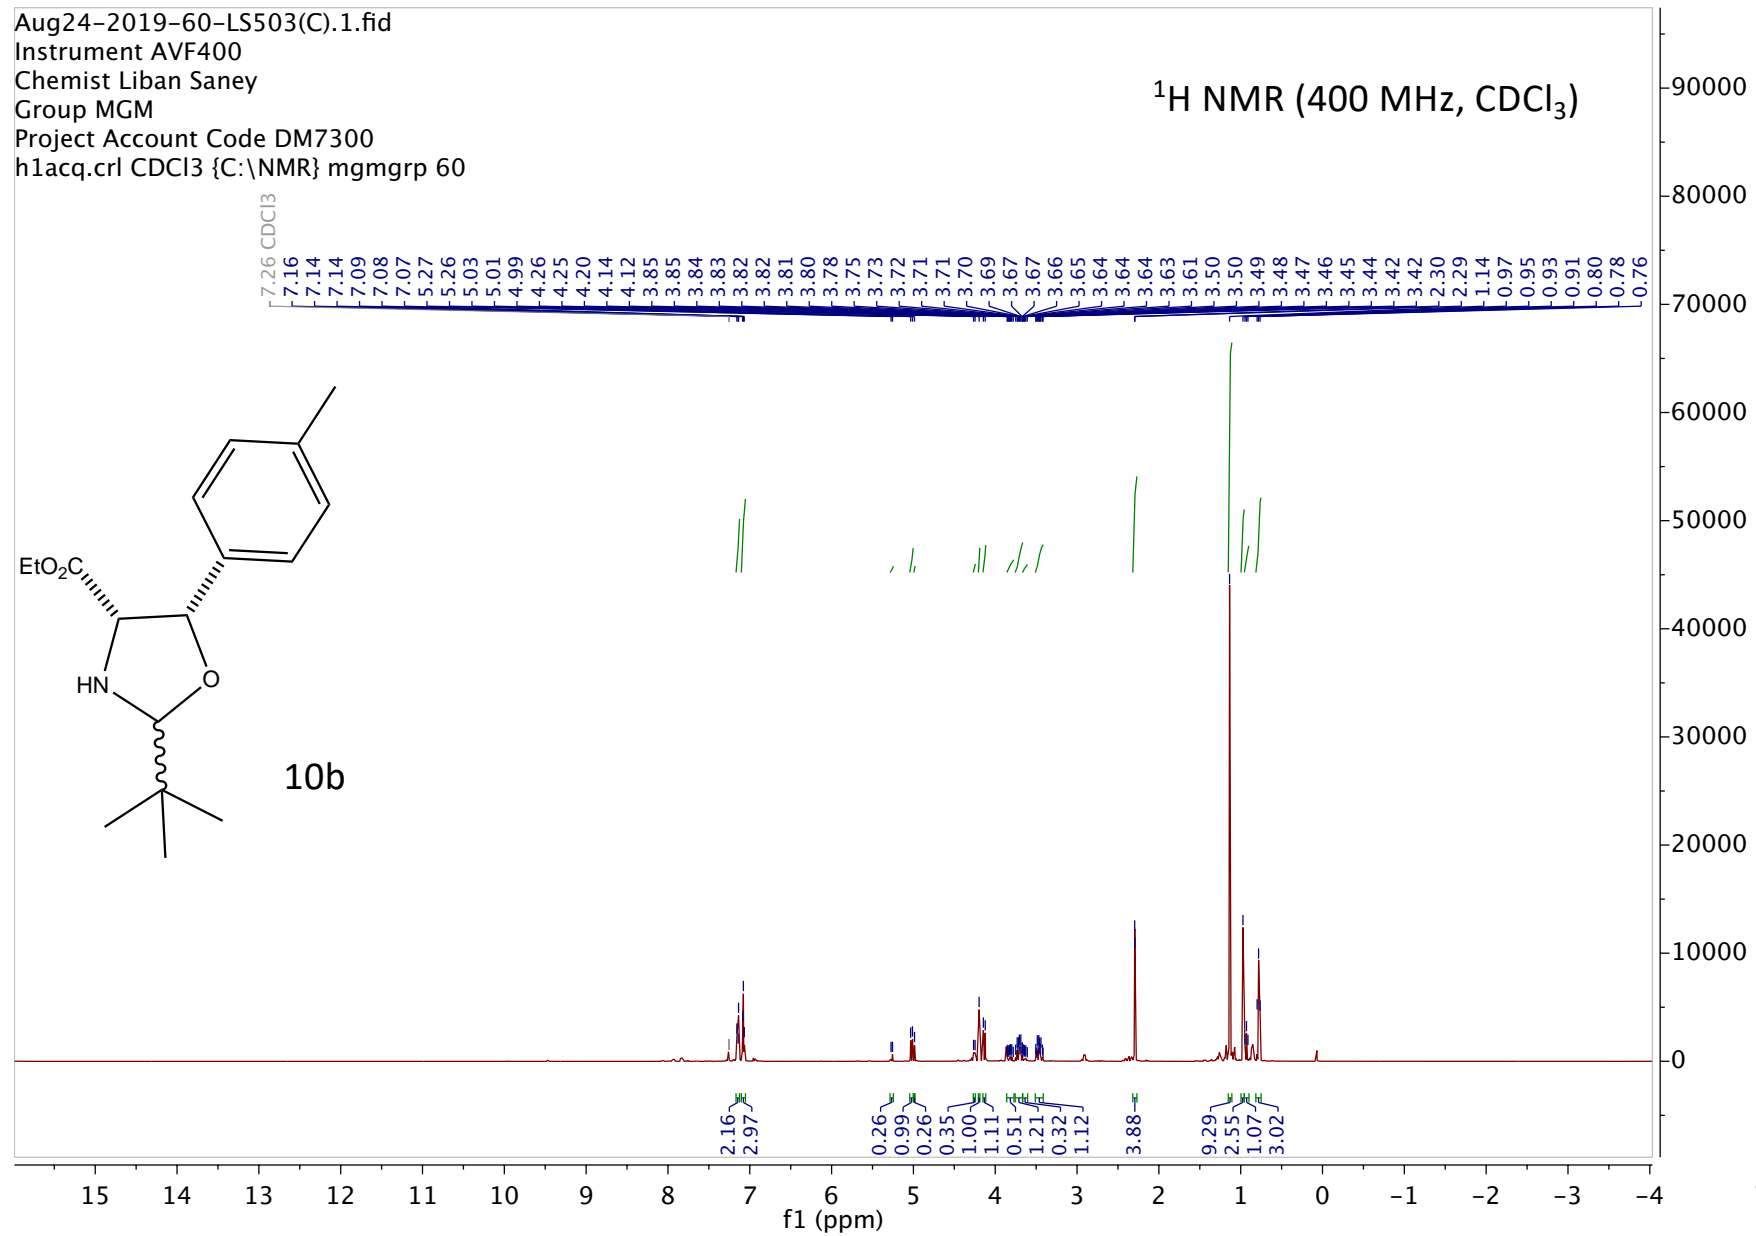

Aug24-2019-60-LS503(C).4.fid  
Instrument AVF400  
Chemist Liban Saney  
Group MGM  
Project Account Code DM7300  
c13acq\_512.crl CDCl3 {C:\NMR} mgmgrp 60

<sup>13</sup>C NMR (101 MHz, CDCl<sub>3</sub>)

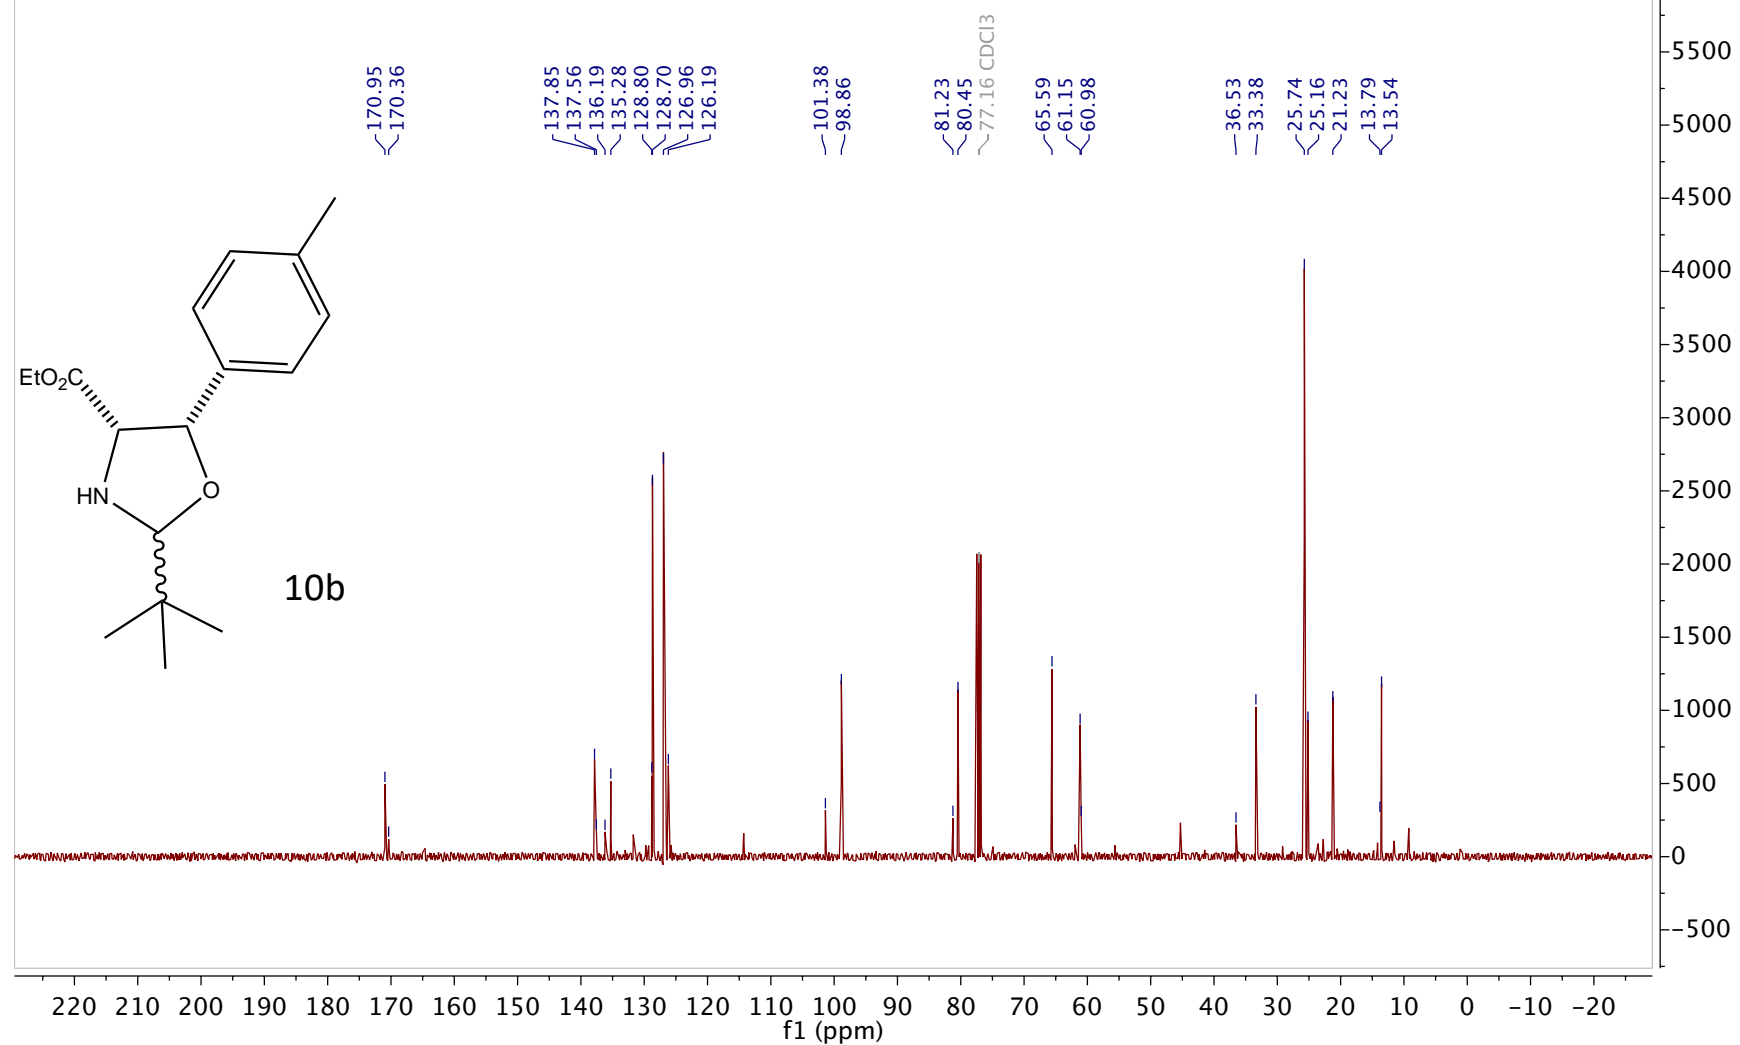

Sep04-2019-60-LS521(C).1.fid  
Instrument AVF400  
Chemist Liban Saney  
Group MGM  
Project Account Code DM7300  
h1acq.crl CDCl3 {C:\NMR} mgmgrp 60

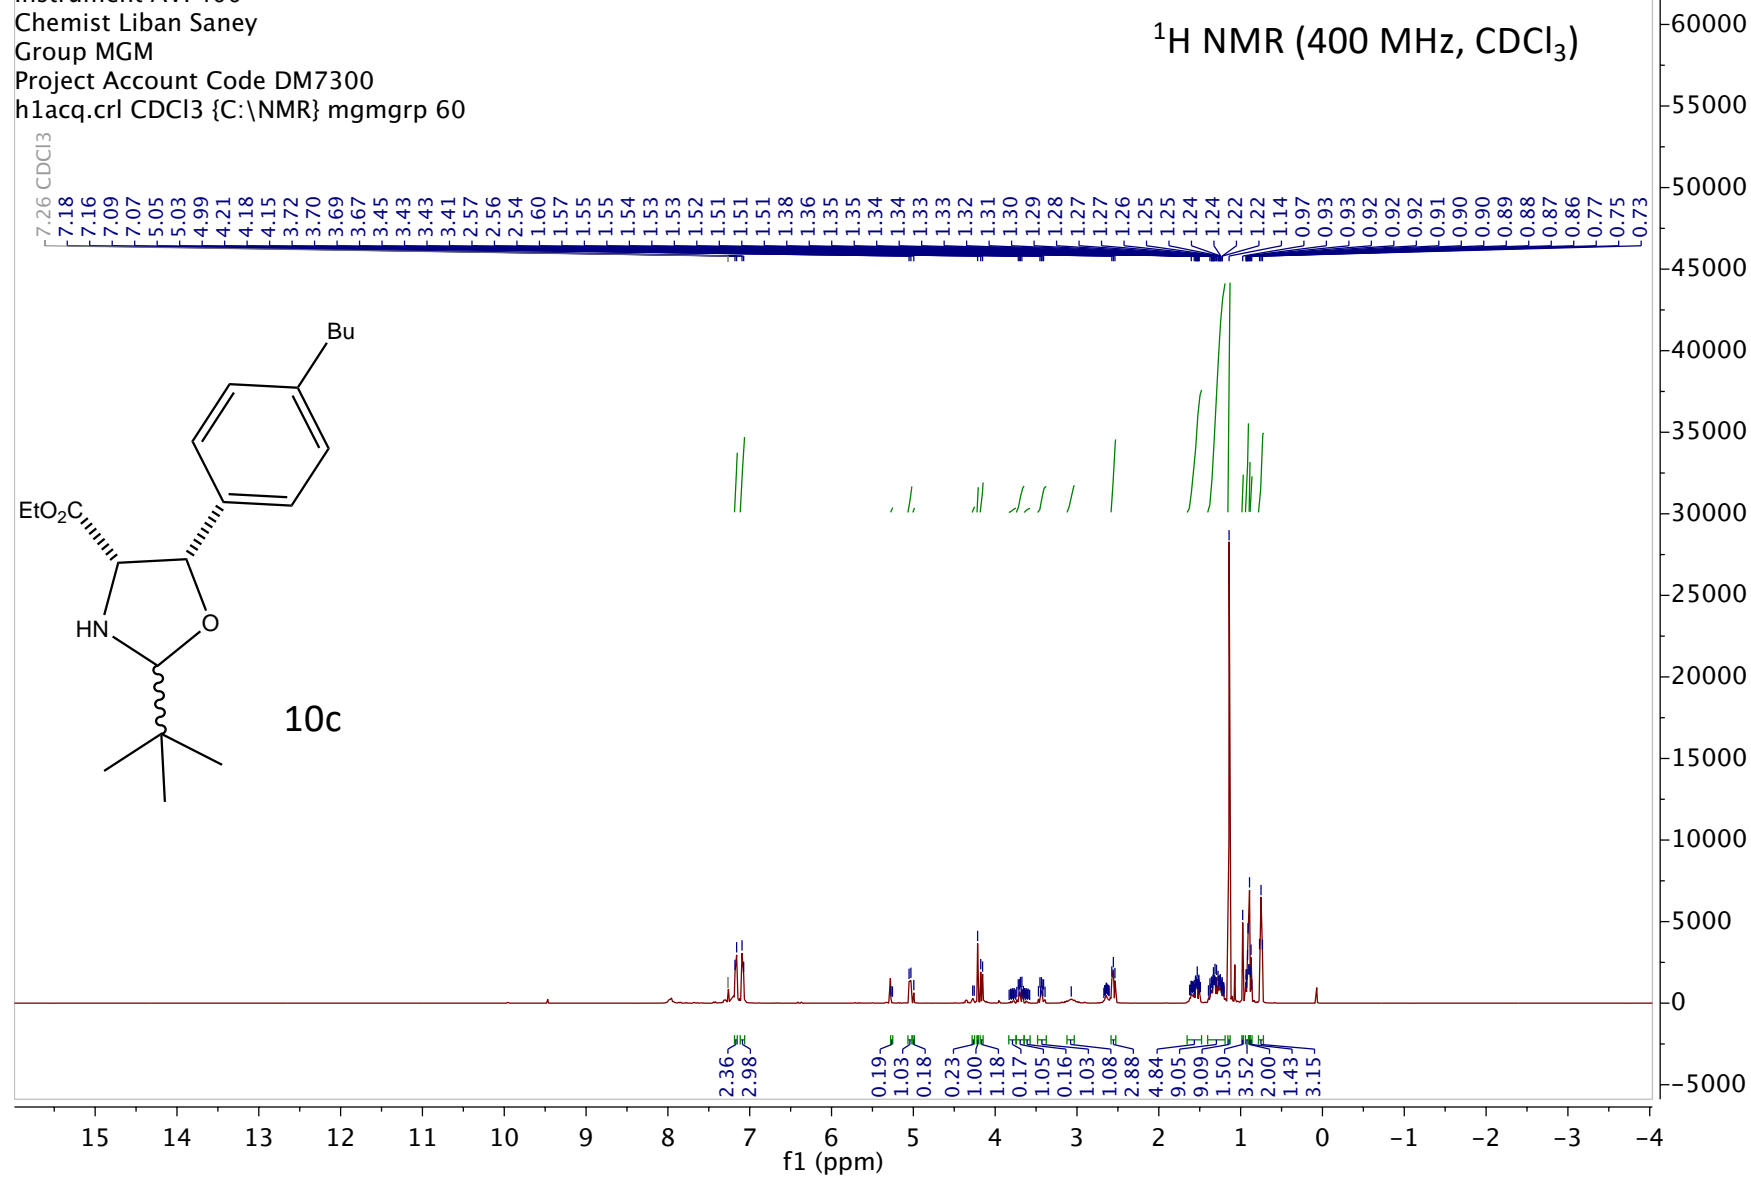



Sep04-2019-60-LS521(C).4.fid  
Instrument AVF400  
Chemist Liban Saney  
Group MGM  
Project Account Code DM7300  
c13acq\_512.crl CDCl3 {C:\NMR} mgmgrp 60

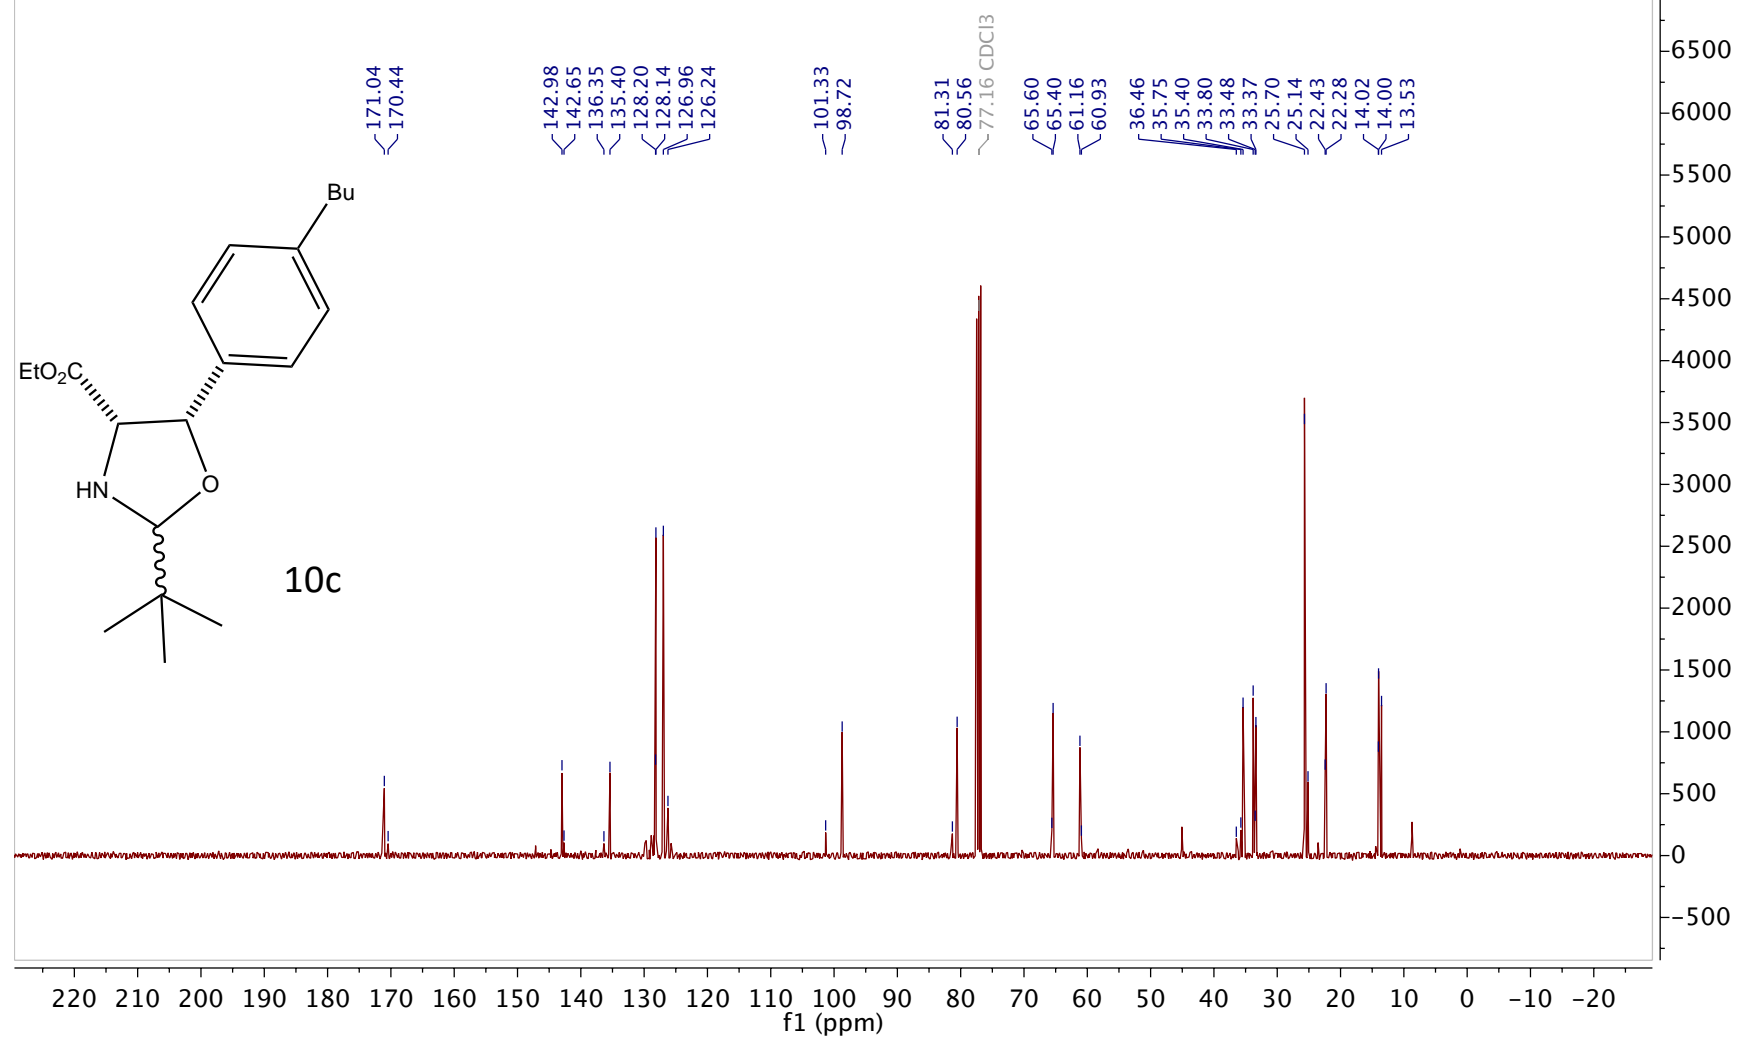

Aug31-2019-60-LS516(C).1.fid  
Instrument AVF400  
Chemist Liban Saney  
Group MGM  
Project Account Code DM7300  
h1acq.crl CDCl3 {C:\NMR} mgmgrp 60

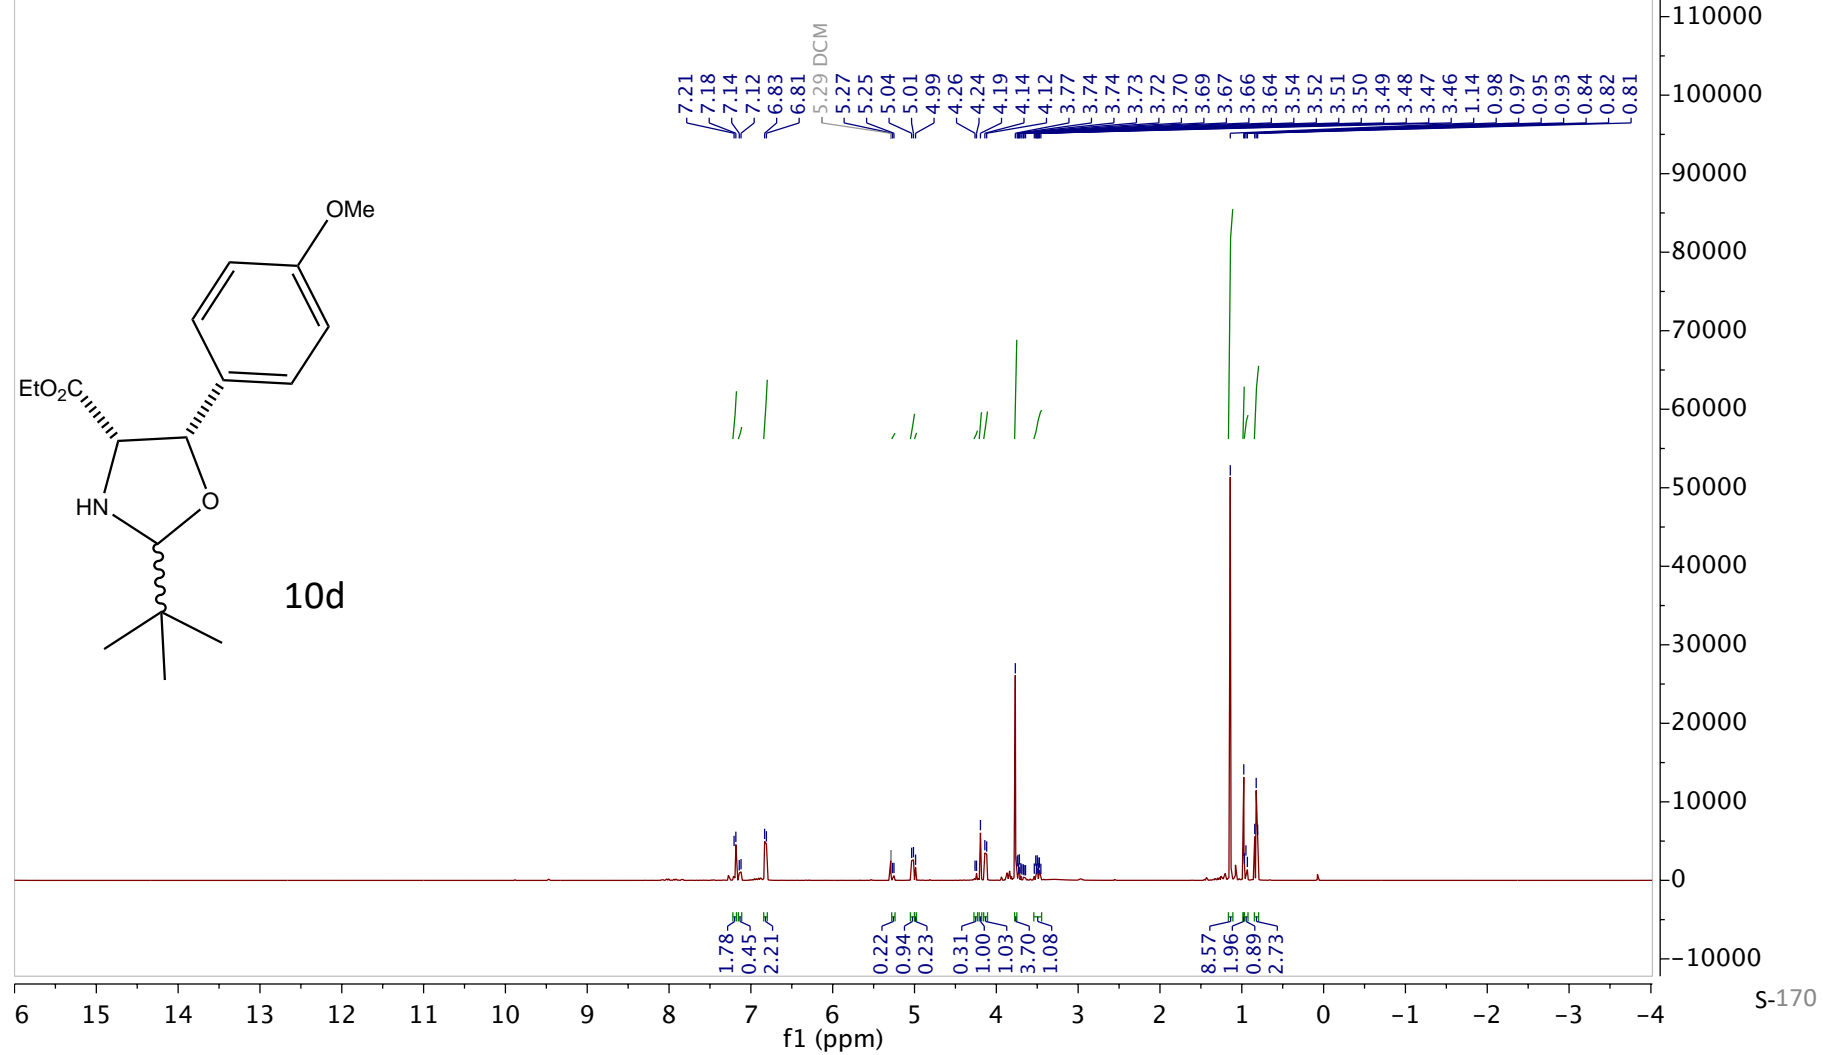

Aug31-2019-60-LS516(C).4.fid  
Instrument AVF400  
Chemist Liban Saney  
Group MGM  
Project Account Code DM7300  
c13acq\_512.crl CDCl3 {C:\NMR} mgmgrp 60

<sup>13</sup>C NMR (101 MHz, CDCl<sub>3</sub>)

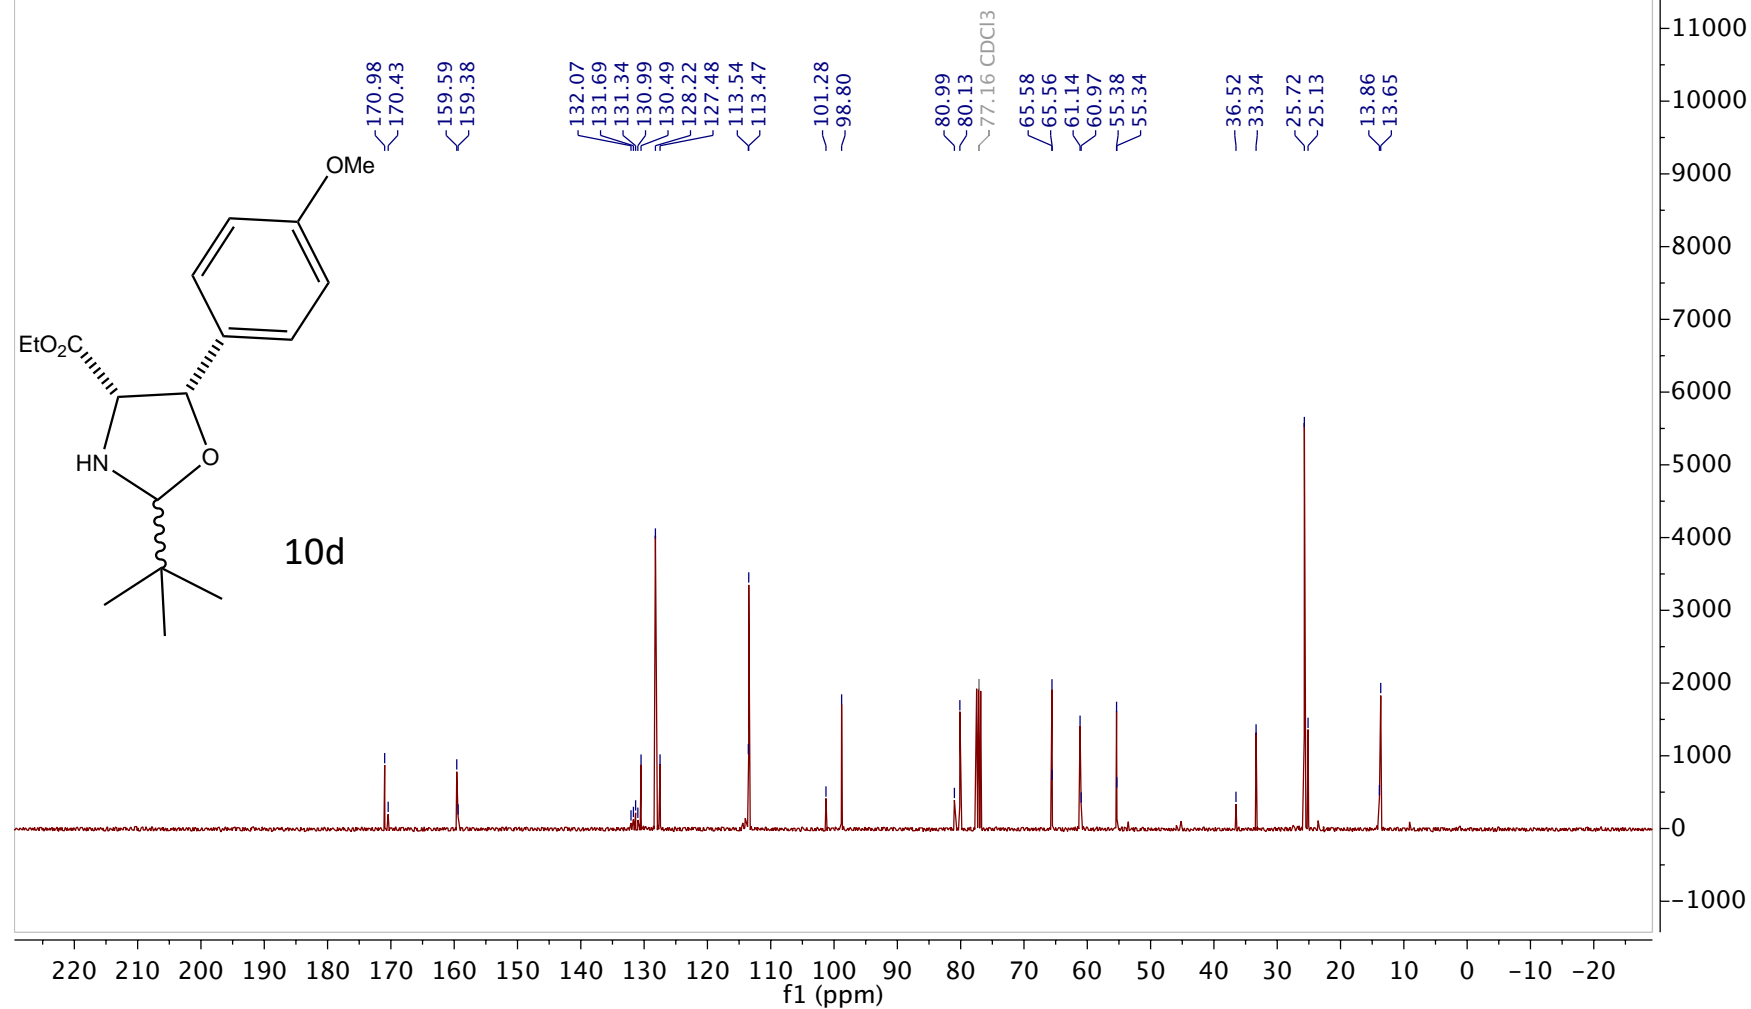

Jul21-2020-2-LS696(C).1.fid  
Instrument AVH400  
Group MGM  
Chemist Liban Saney  
Project Account Code DM7300  
h1acq.crl CDCl3 {C:\NMR} mgmgrp 2

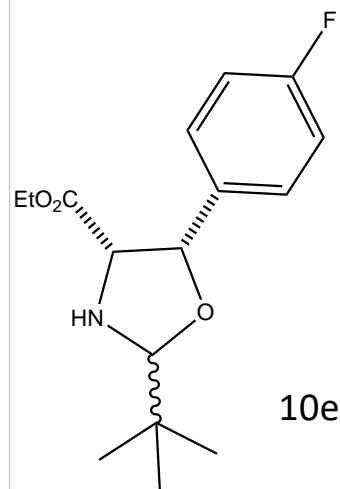

<sup>1</sup>H NMR (400 MHz, CDCl<sub>3</sub>)

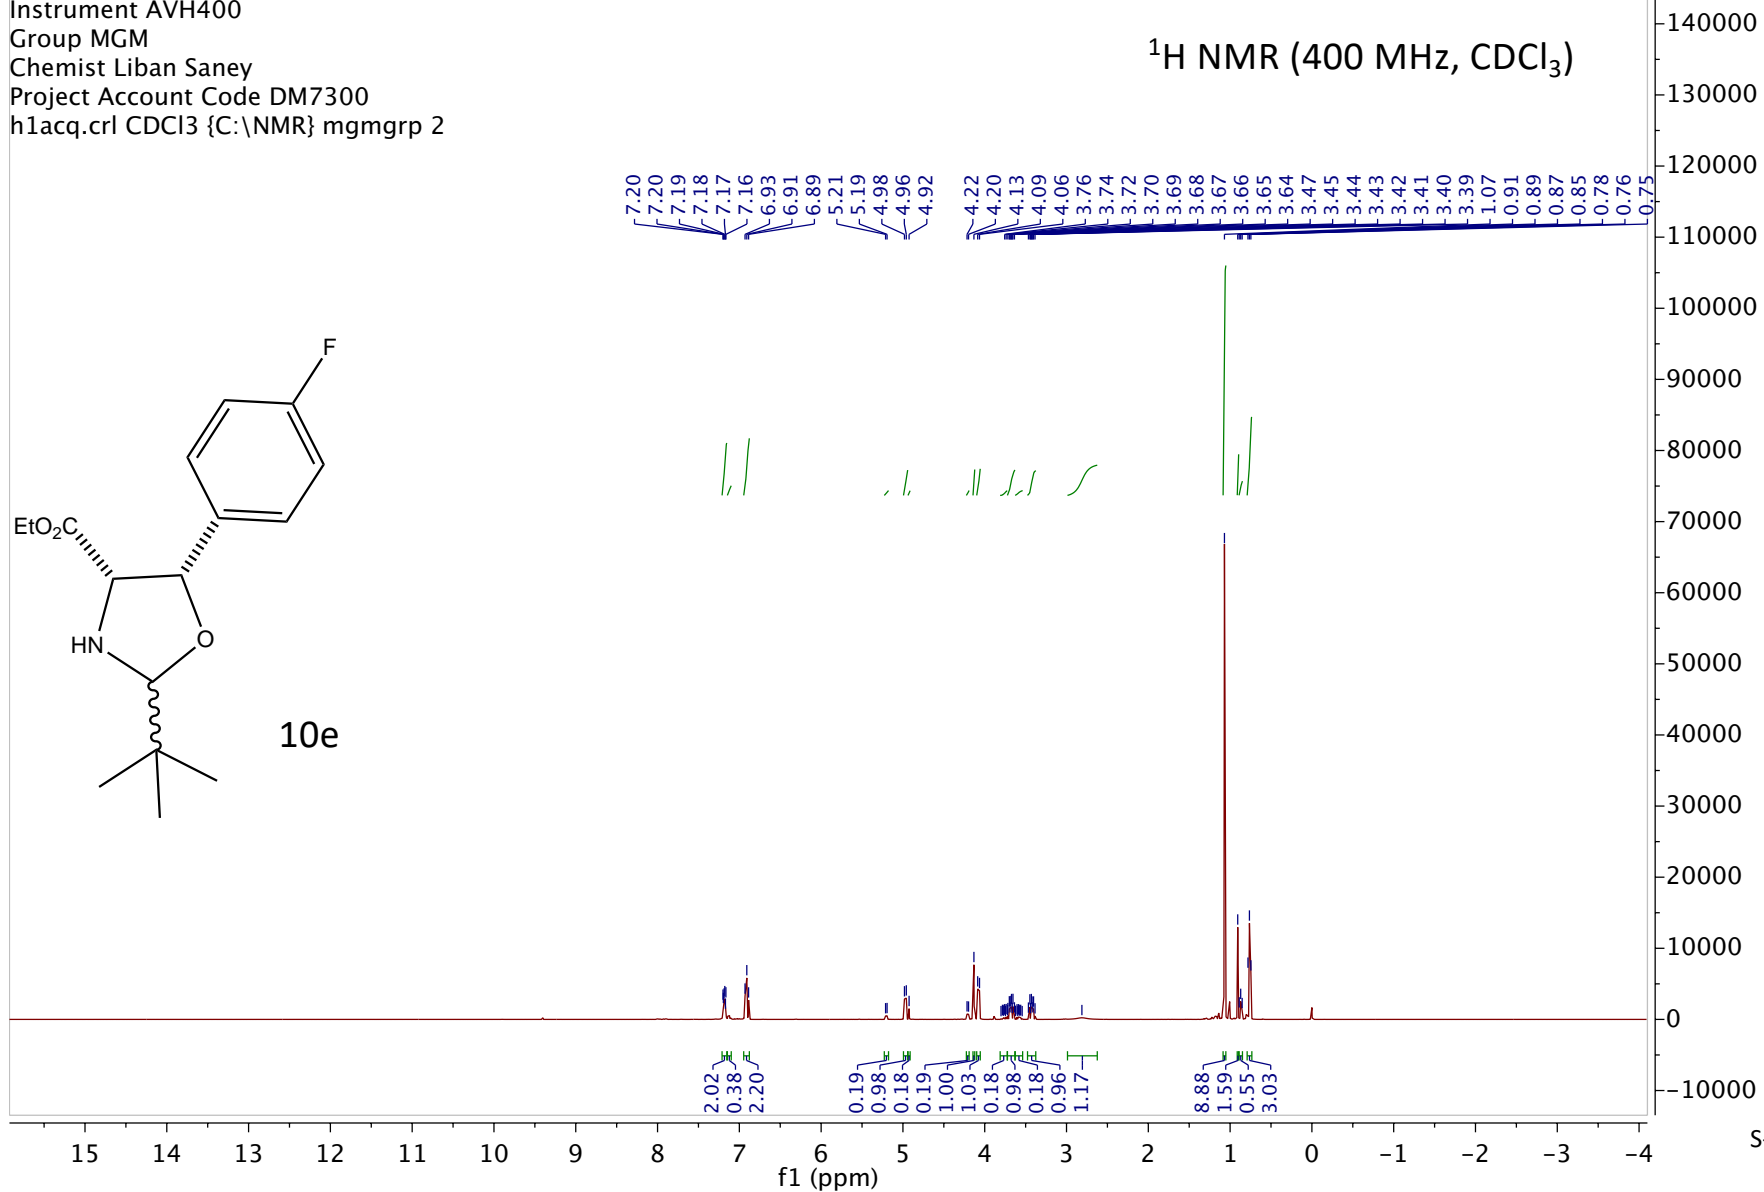

Jul21-2020-2-LS696(C).4.fid

Instrument AVH400

Group MGM

Chemist Liban Saney

Project Account Code DM7300

c13acq\_512.crl CDCl3 {C:\NMR} mgmgrp 2

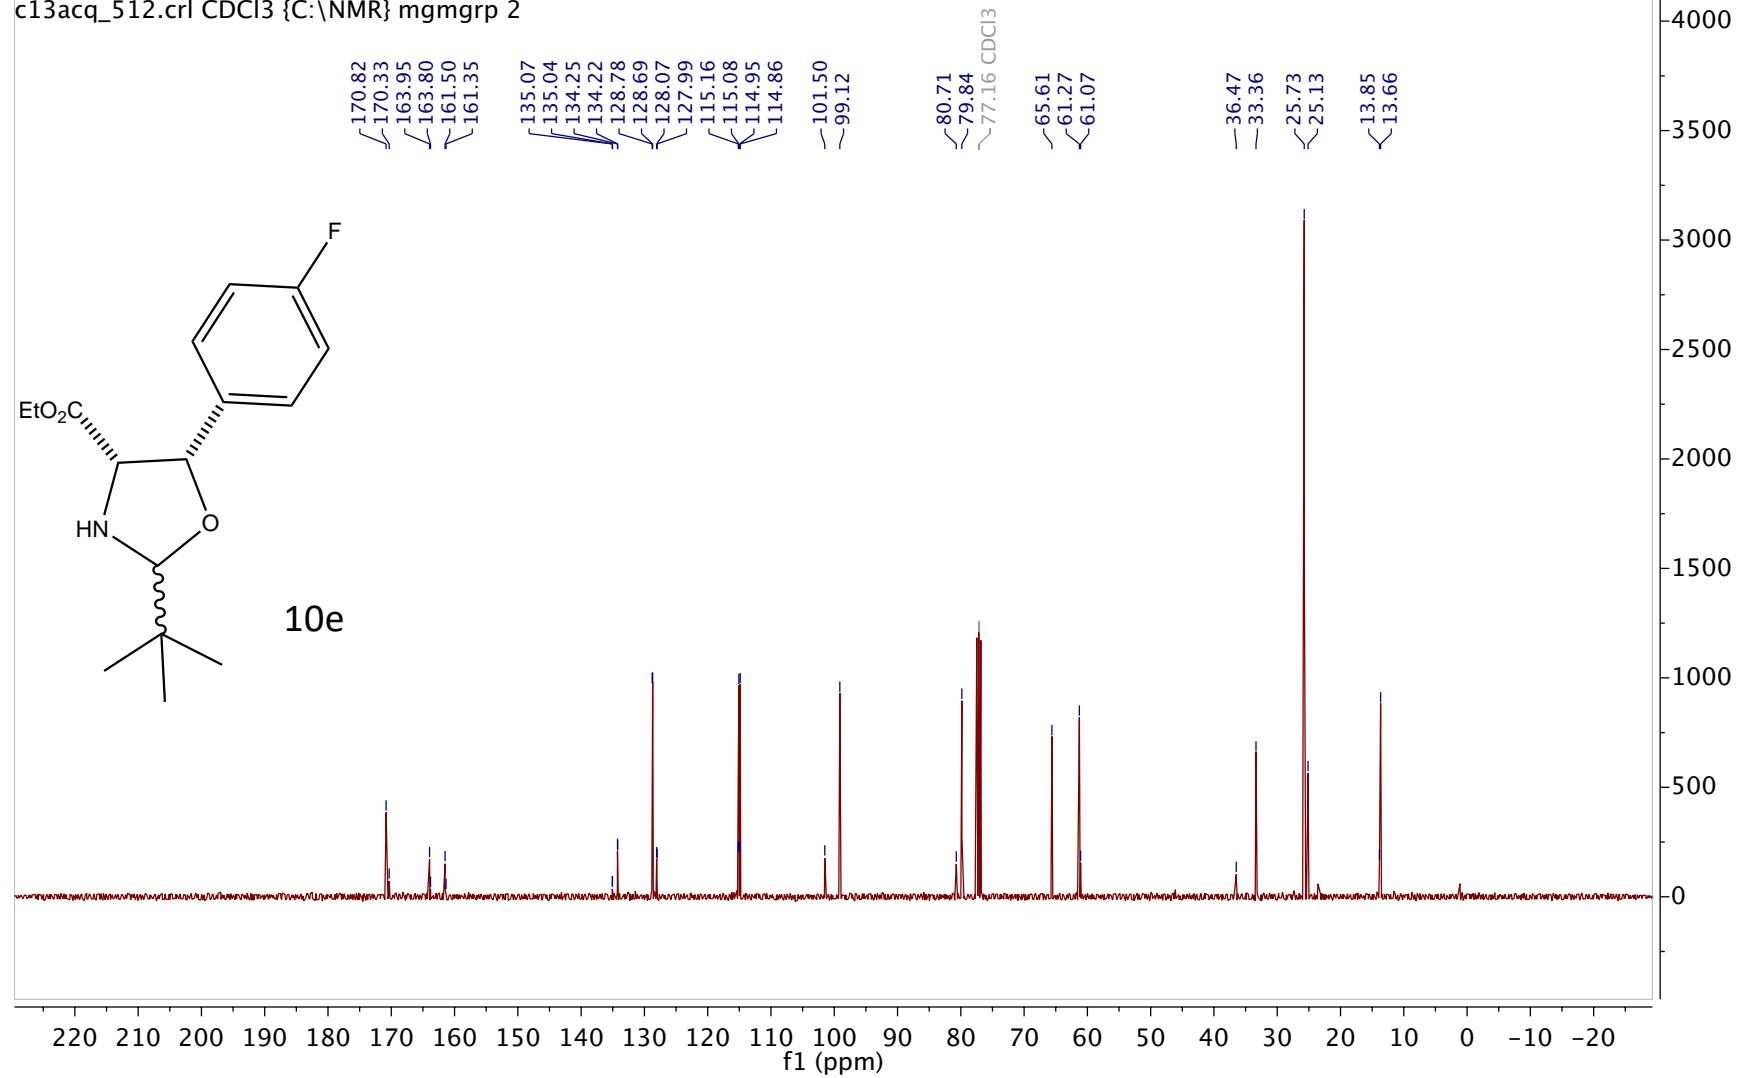

Jul21-2020-2-LS696(C).7.fid  
Instrument AVH400  
Group MGM  
Chemist Liban Saney  
Project Account Code DM7300  
f19dec\_256.crl CDCl3 {C:\NMR} mgmgrp 2

$^{19}\text{F}$  NMR (376 MHz,  $\text{CDCl}_3$ )

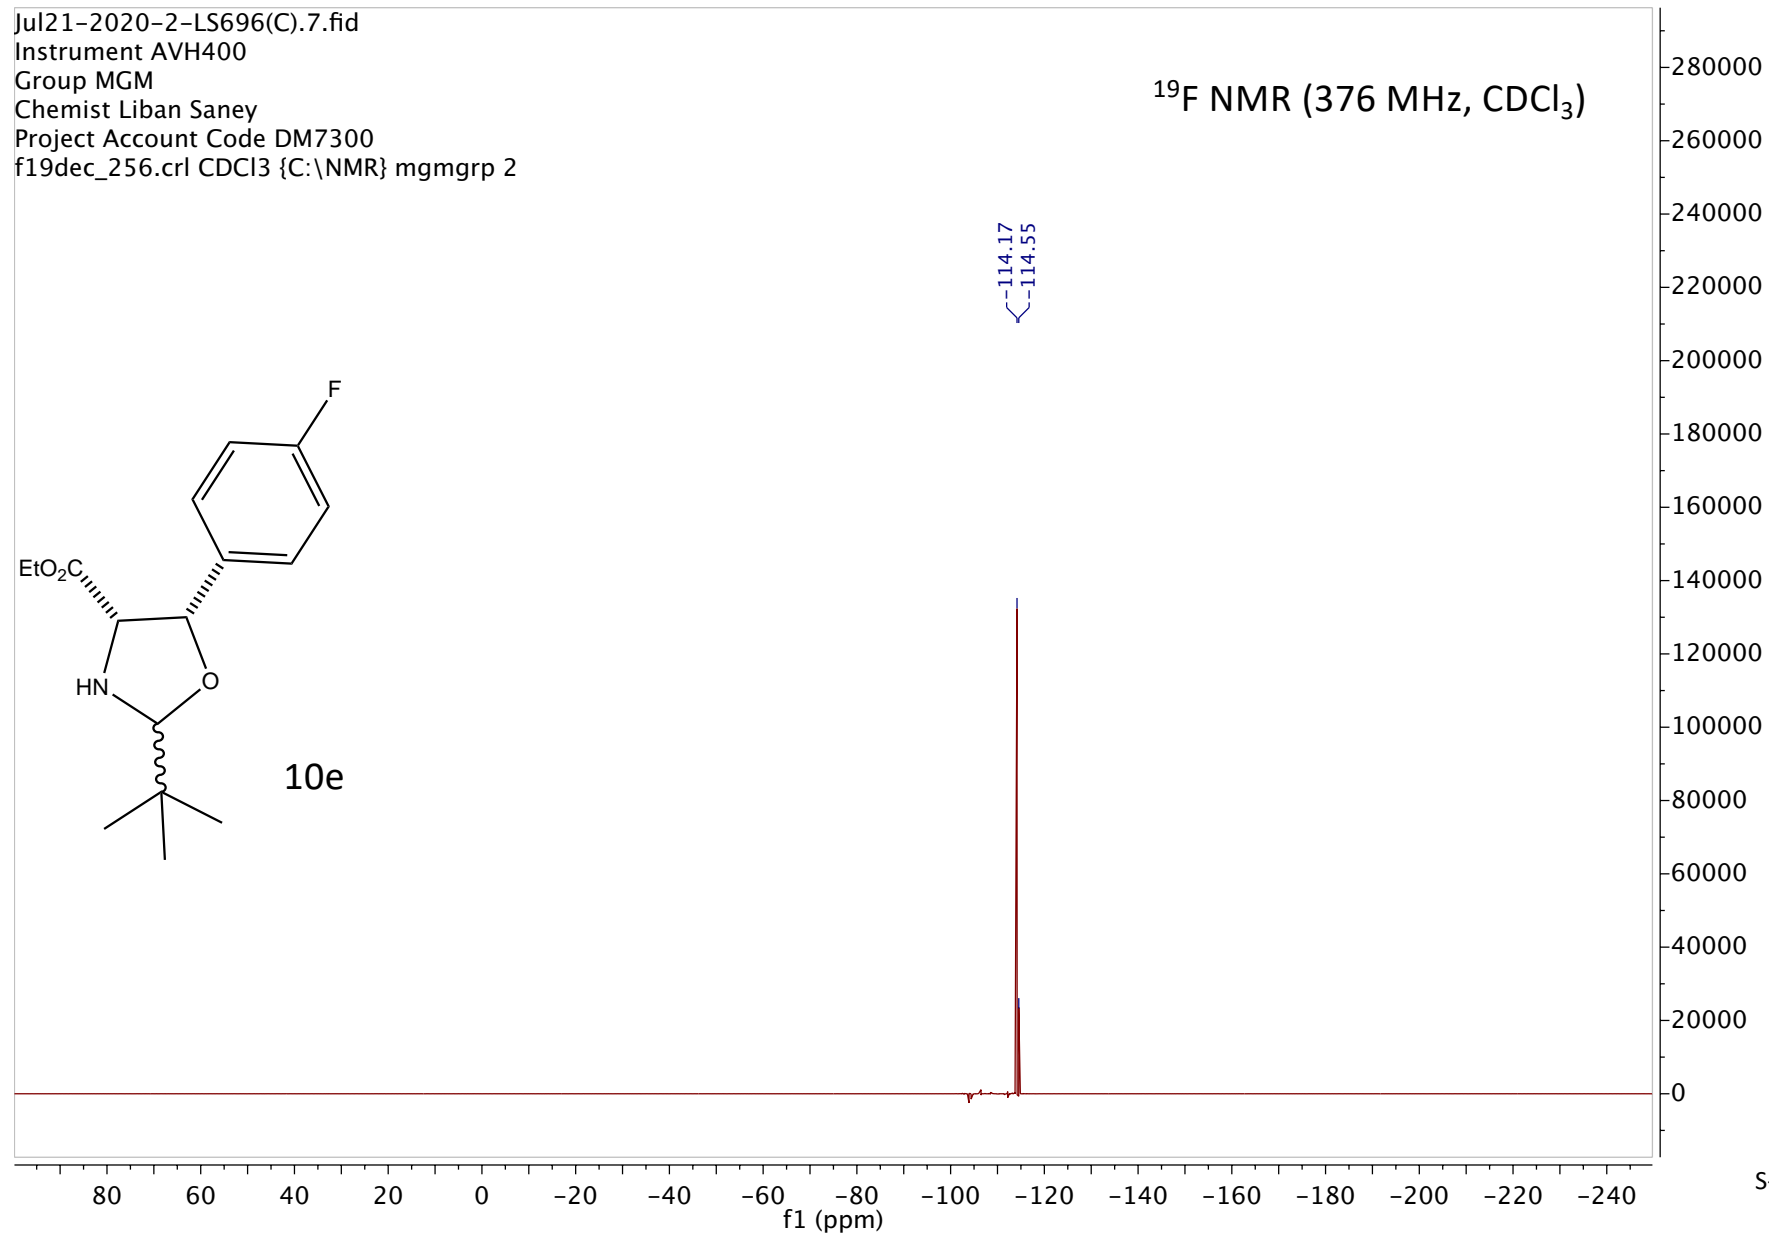

Sep19-2019-58-LS535(C).1.fid  
Instrument AVF400  
Chemist Liban Saney  
Group MGM  
Project Account Code DM7300  
h1acq.crl CDCl3 {C:\NMR} mgmgrp 58

<sup>1</sup>H NMR (400 MHz, CDCl<sub>3</sub>)

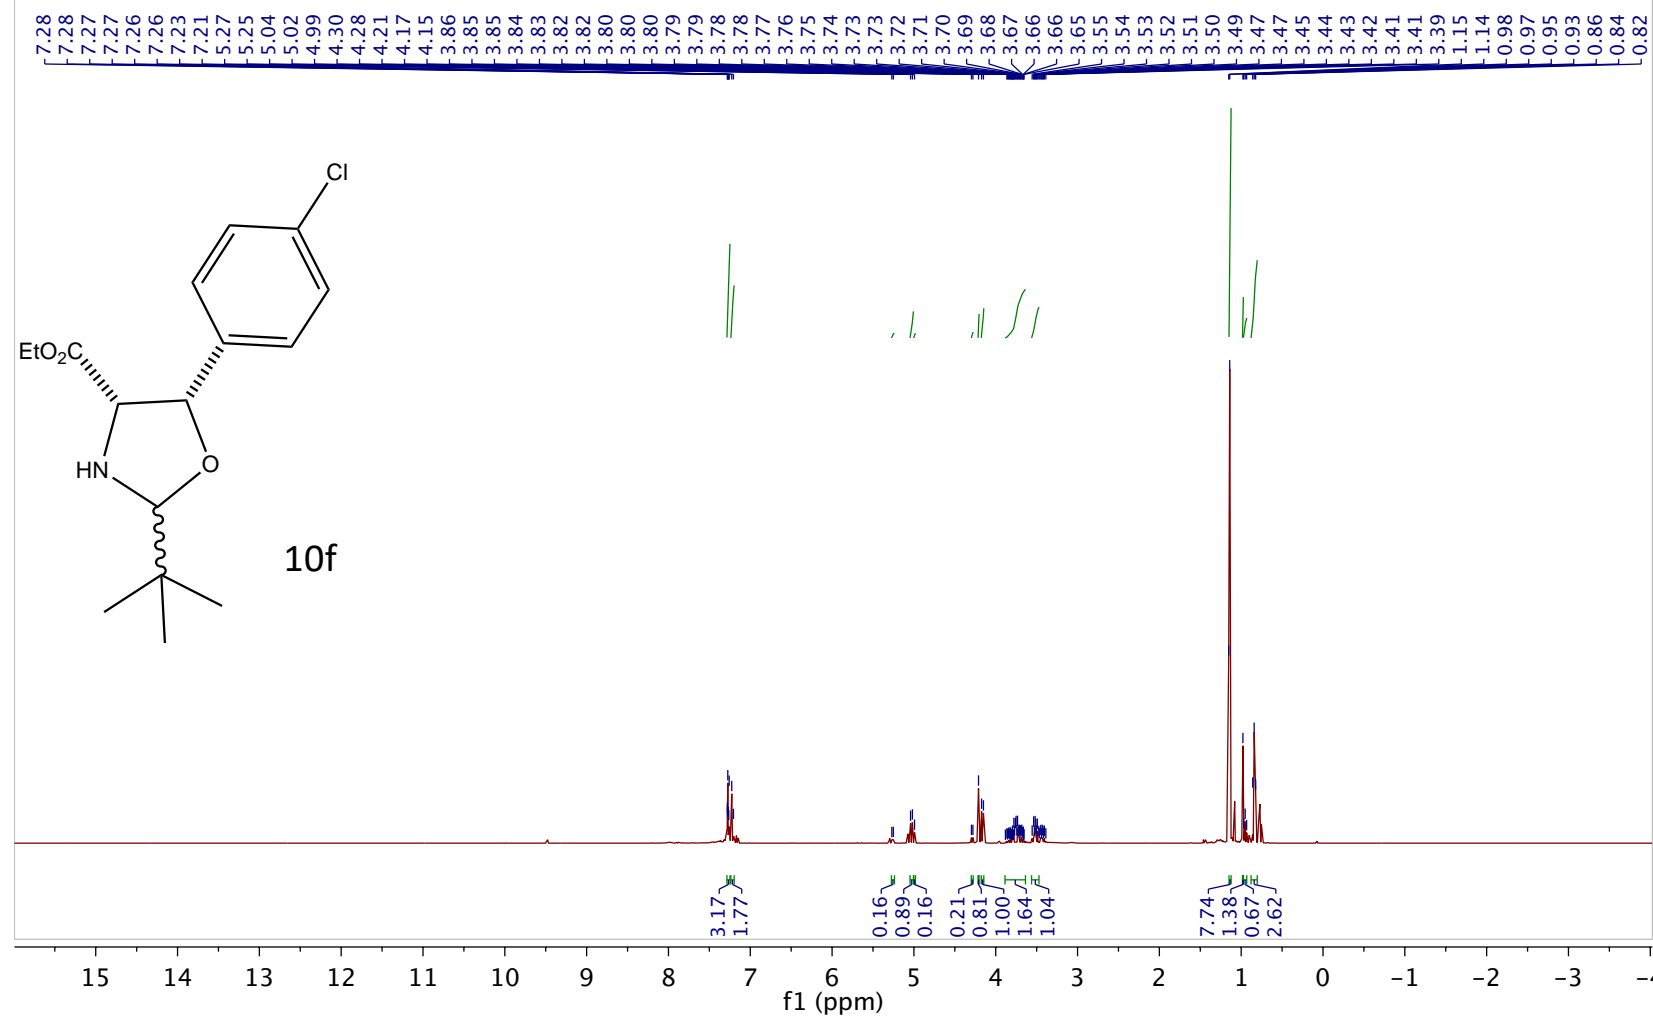

Sep19-2019-58-LS535(C).4.fid

Instrument AVF400

Chemist Liban Saney

Group MGM

Project Account Code DM7300

c13acq\_512.crl CDCl3 {C:\NMR} mgmgrp 58

$^{13}\text{C}$  NMR (101 MHz,  $\text{CDCl}_3$ )

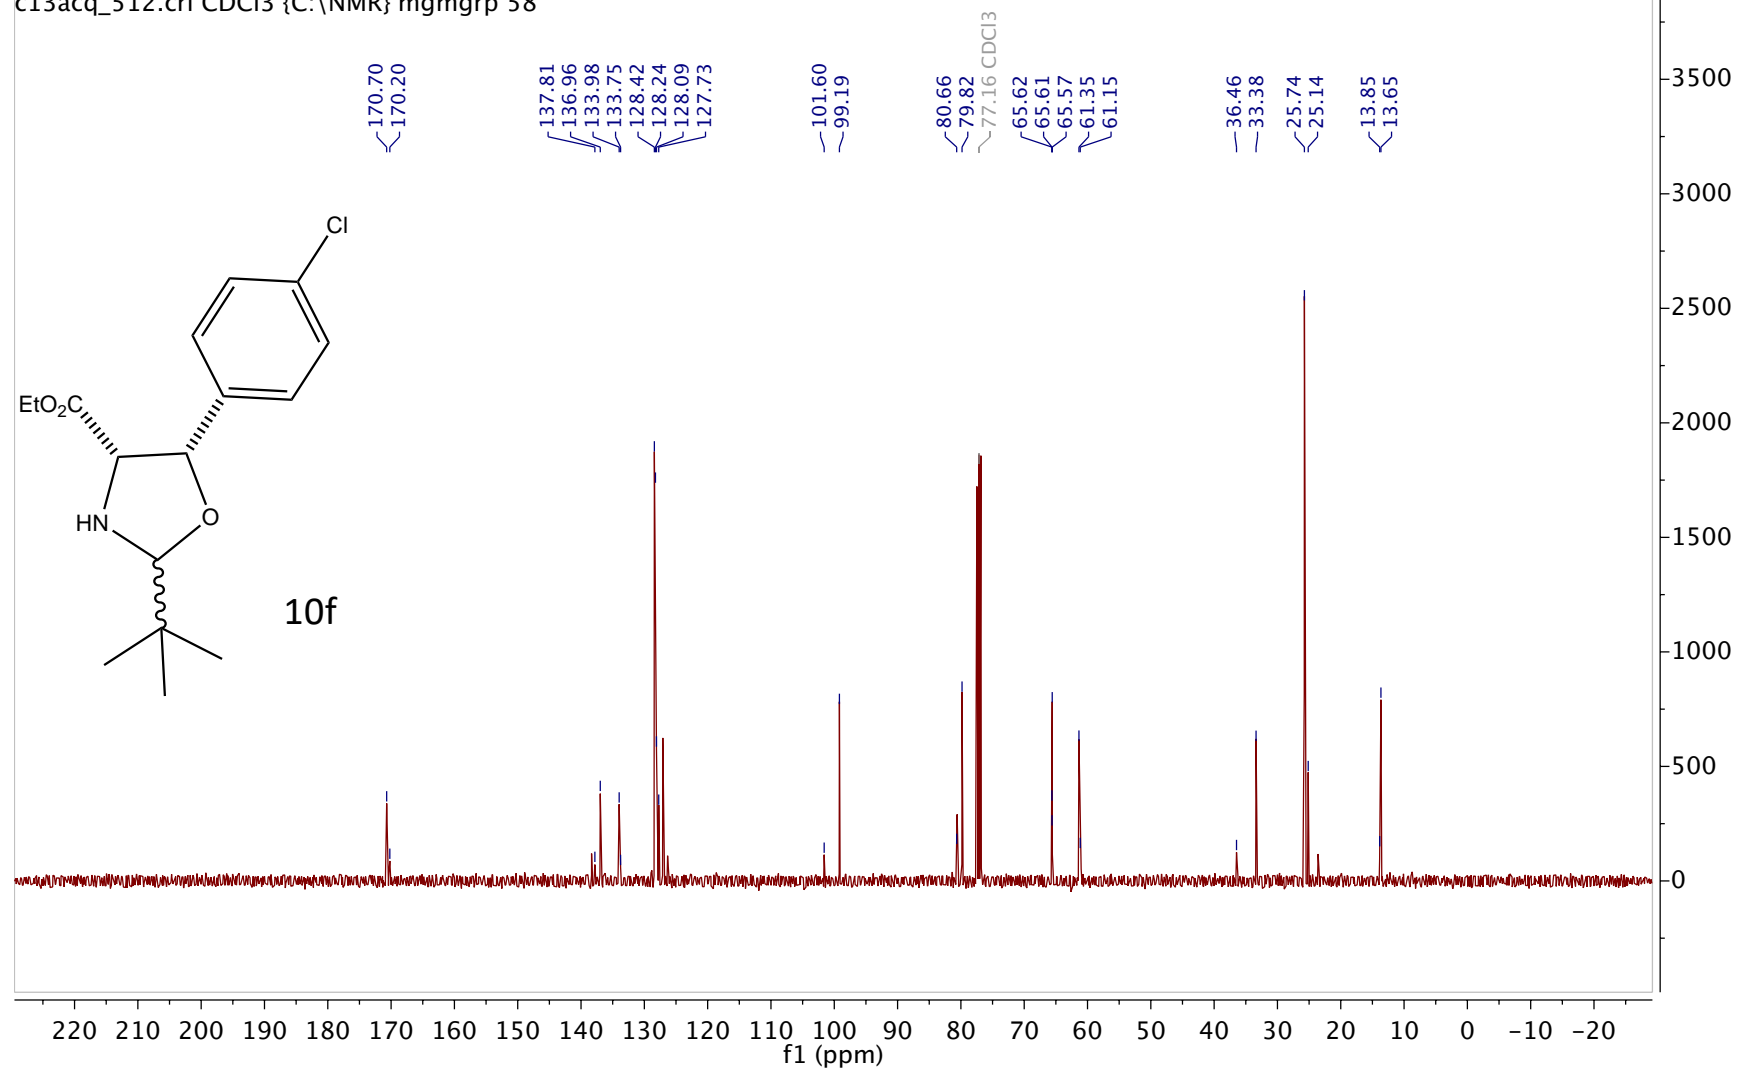



Jan31-2021-1-LS929(C).1.fid  
Instrument AVH400  
Group MGM  
Chemist Liban Saney  
Project Account Code DM7300  
h1acq.crl CDCl3 {C:\NMR} mgmgrp 1

<sup>1</sup>H NMR (400 MHz, CDCl<sub>3</sub>)

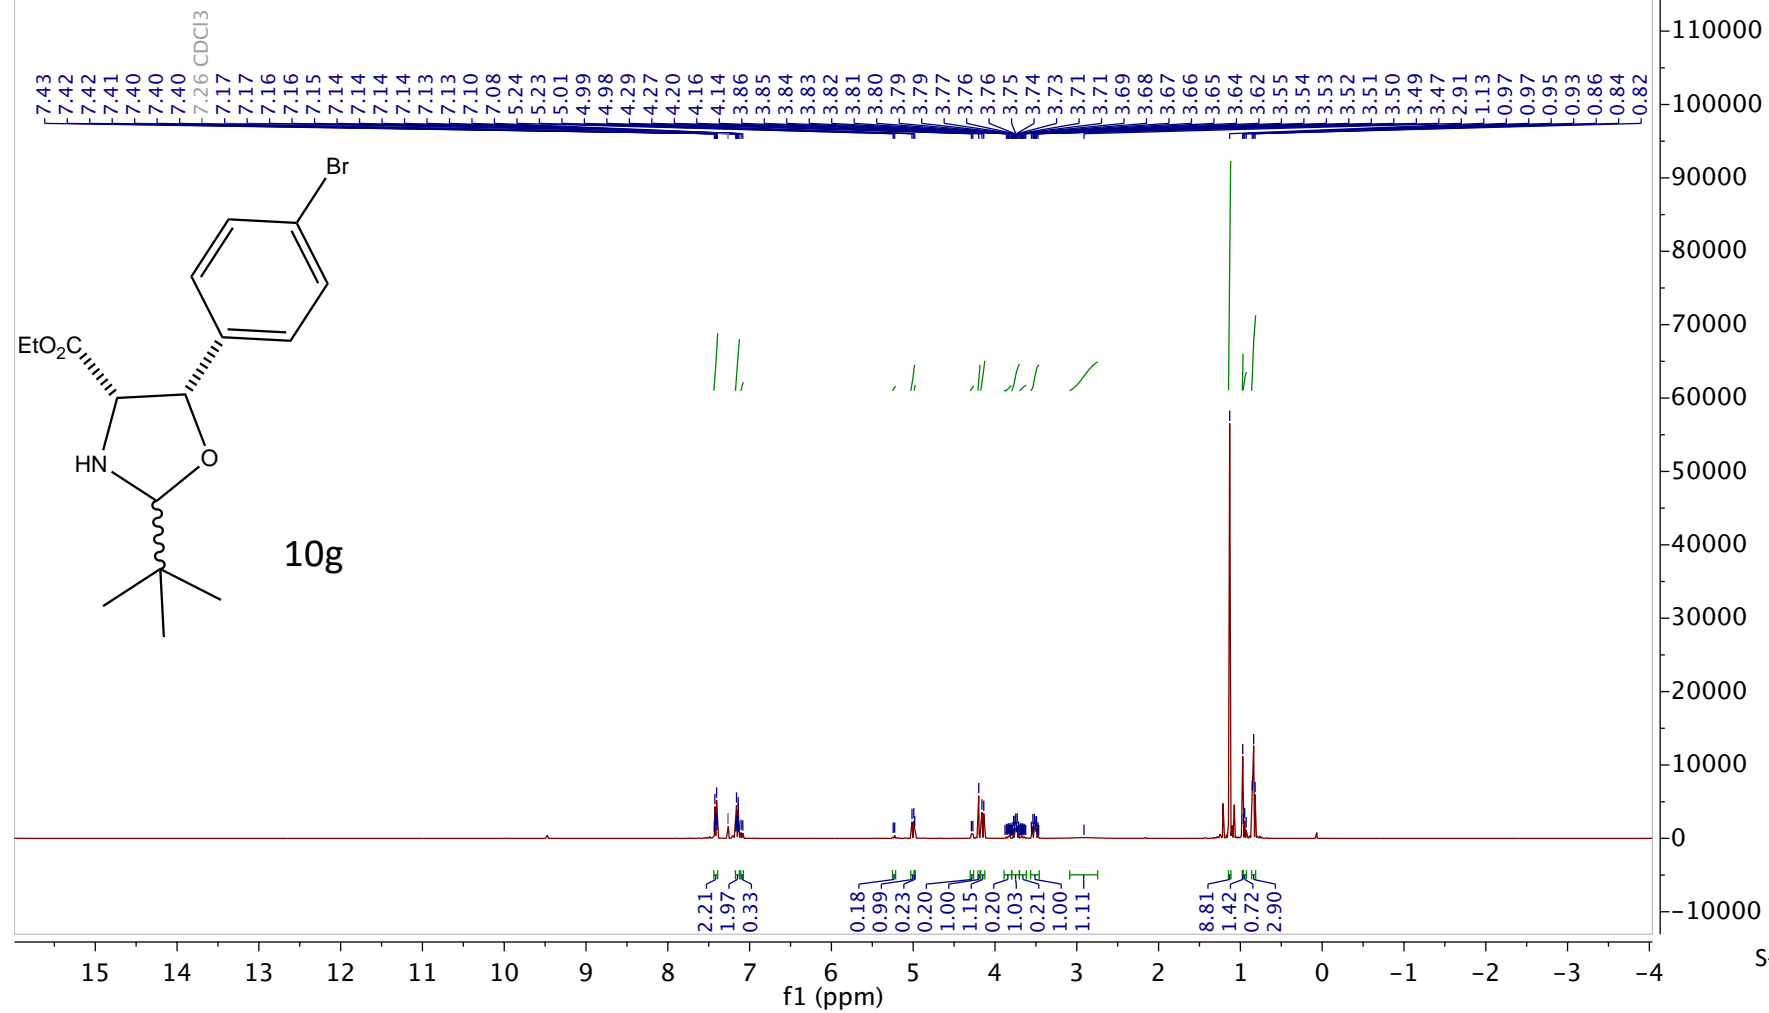

Jan31-2021-1-LS929(C).4.fid  
Instrument AVH400  
Group MGM  
Chemist Liban Saney  
Project Account Code DM7300  
c13acq\_512.crl CDCl3 {C:\NMR} mgmgrp 1

$^{13}\text{C}$  NMR (101 MHz,  $\text{CDCl}_3$ )

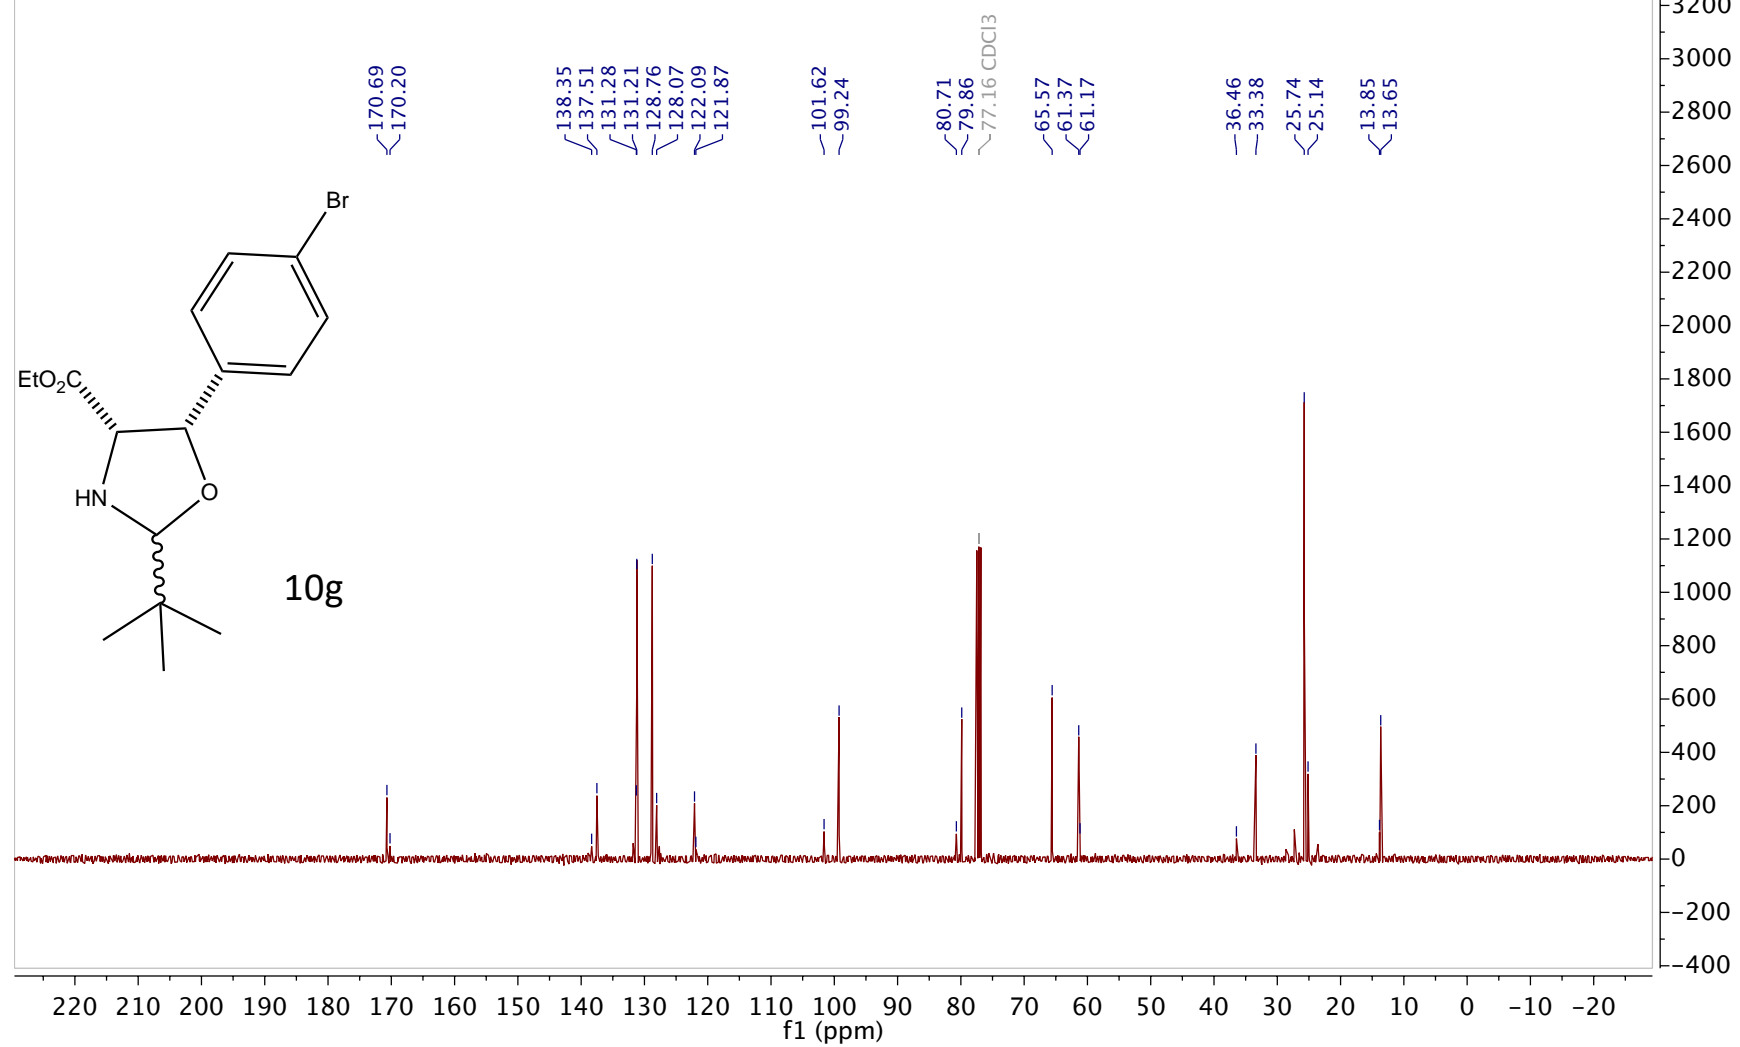

Jan26-2021-6-LS928(C).1.fid  
Instrument AVH400  
Group MGM  
Chemist Liban Saney  
Project Account Code DM7300  
h1acq.crl CDCl3 {C:\NMR} mgmgrp 6

<sup>1</sup>H NMR (400 MHz, CDCl<sub>3</sub>)

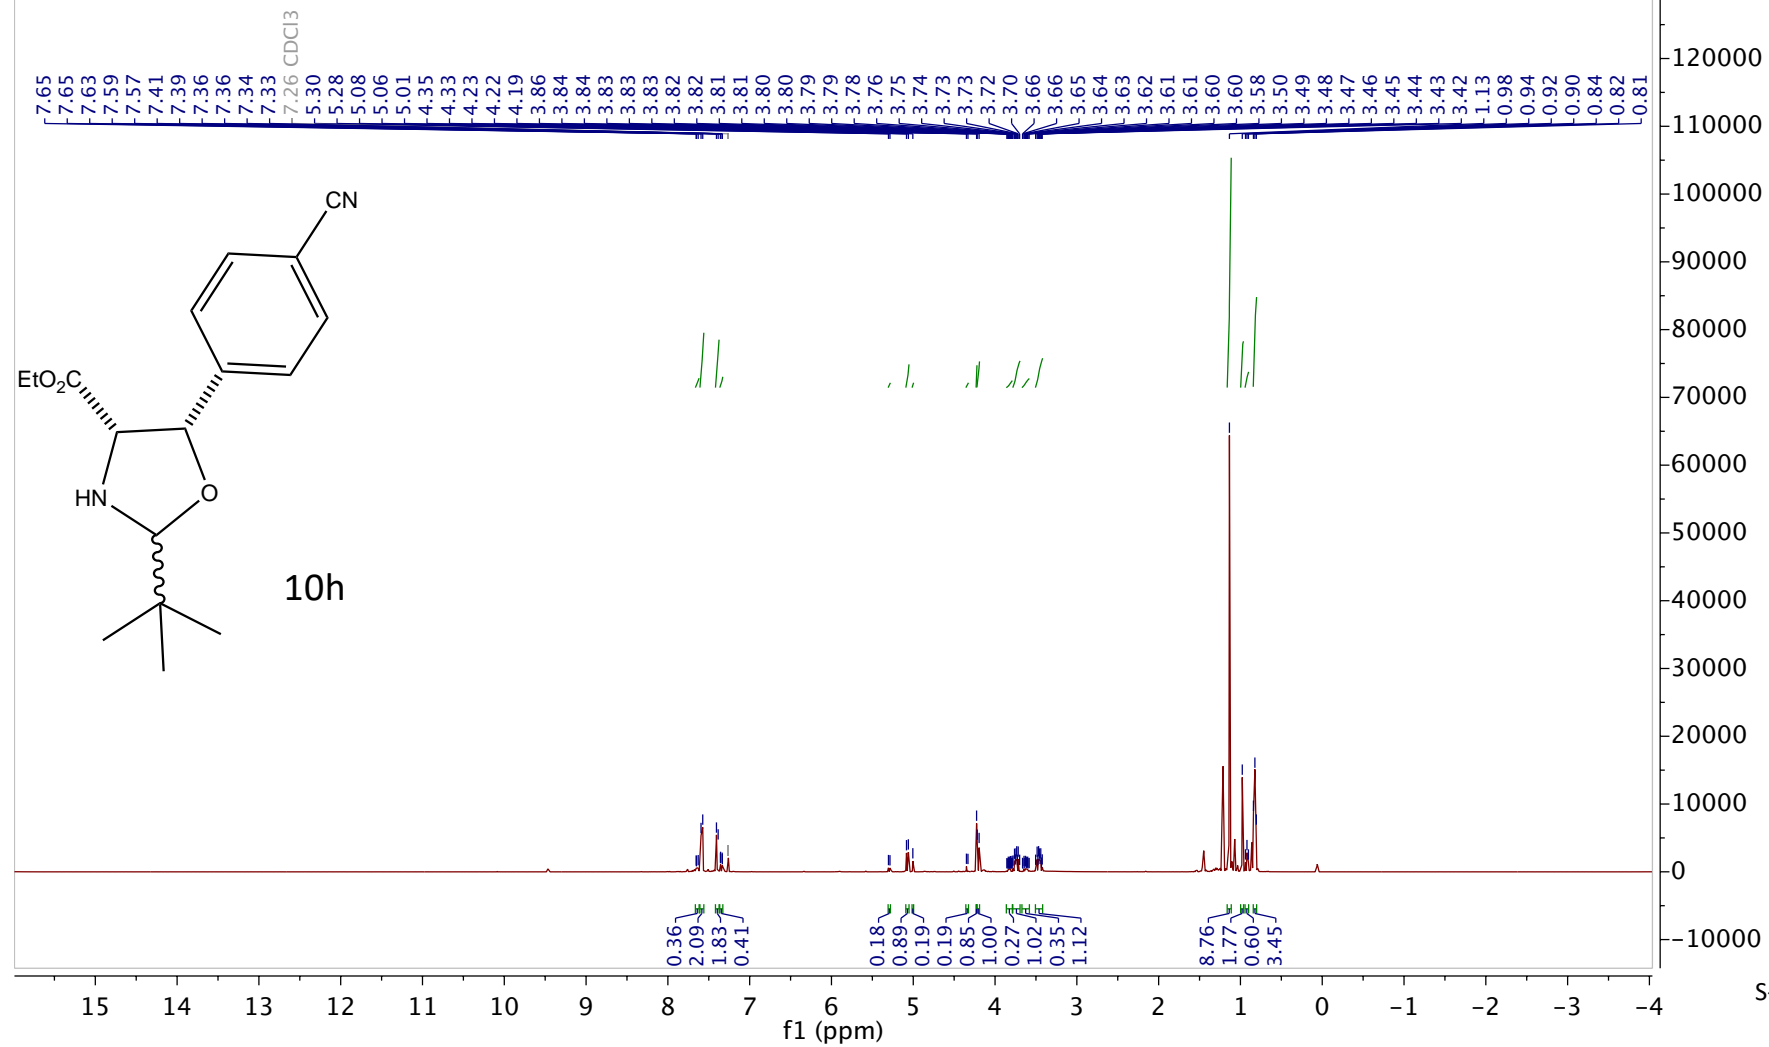

Jan26-2021-6-LS928(C).4.fid  
Instrument AVH400  
Group MGM  
Chemist Liban Saney  
Project Account Code DM7300  
c13acq\_512.crl CDCl3 {C:\NMR} mgmgrp 6

<sup>13</sup>C NMR (101 MHz, CDCl<sub>3</sub>)

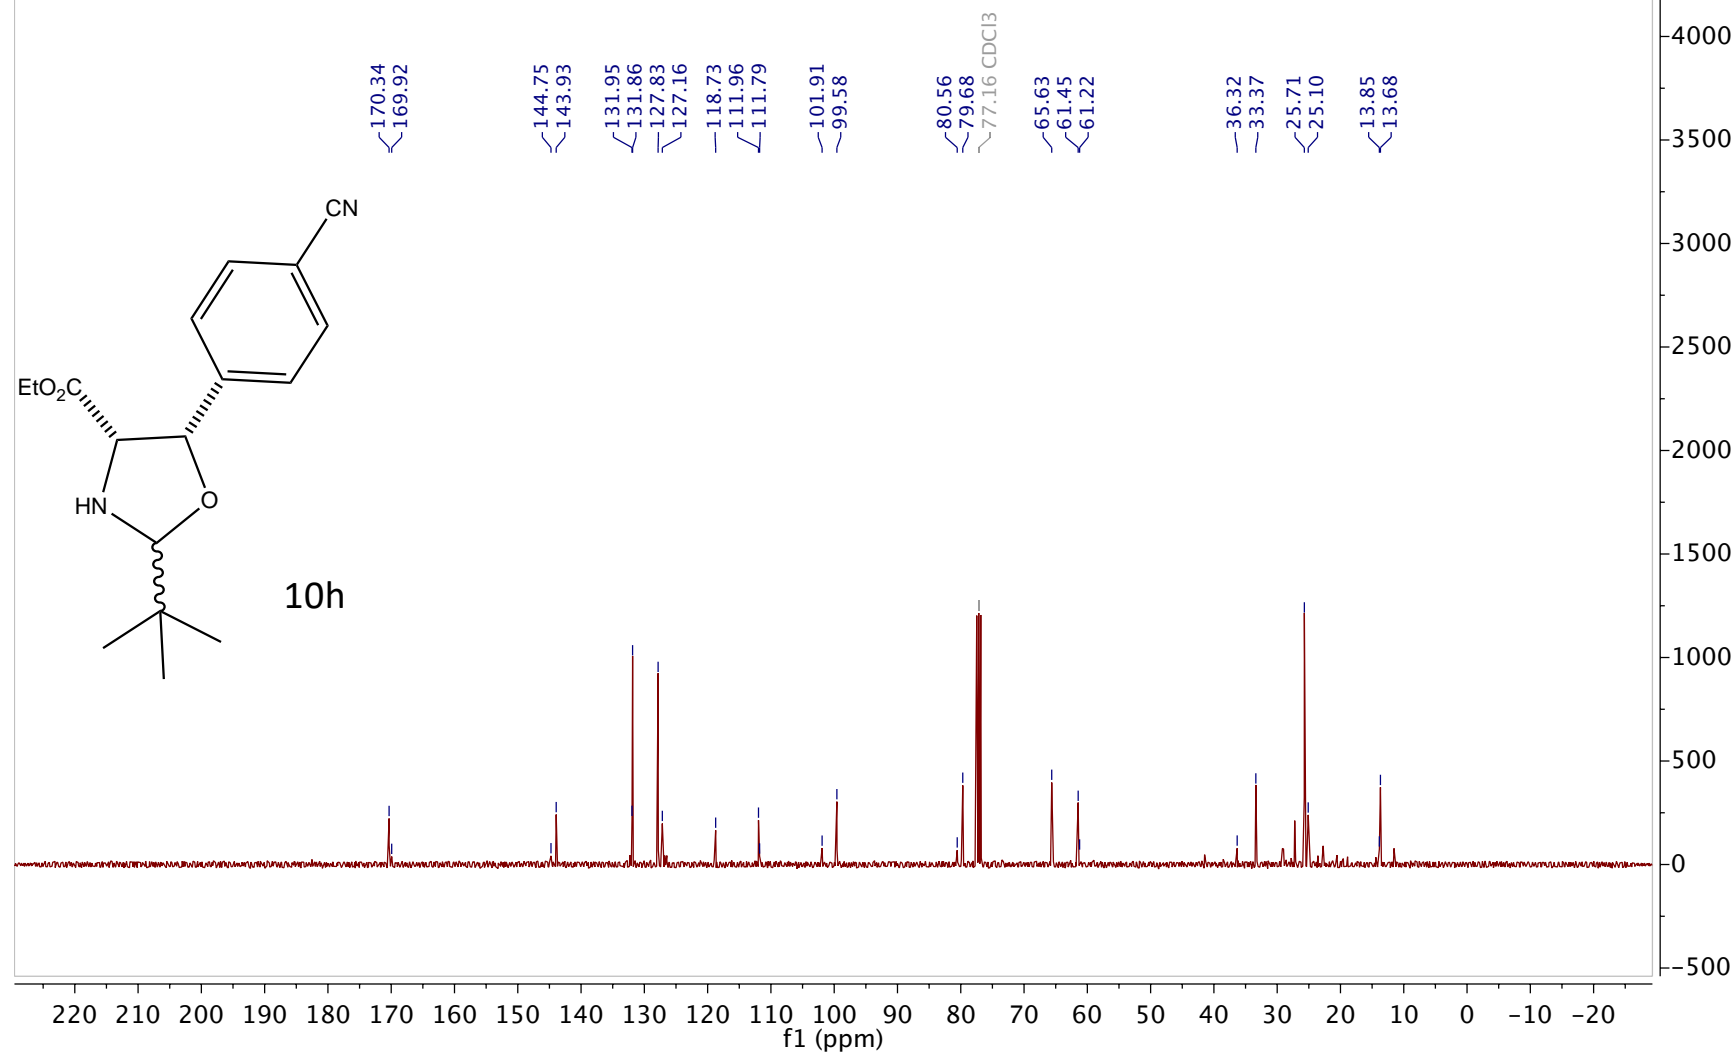

Jan28-2021-10-LS931(C).1.fid  
Instrument AVH400  
Group MGM  
Chemist Liban Saney  
Project Account Code DM7300  
h1acq.crl CDCl3 {C:\NMR} mgmgrp 10

<sup>1</sup>H NMR (400 MHz, CDCl<sub>3</sub>)

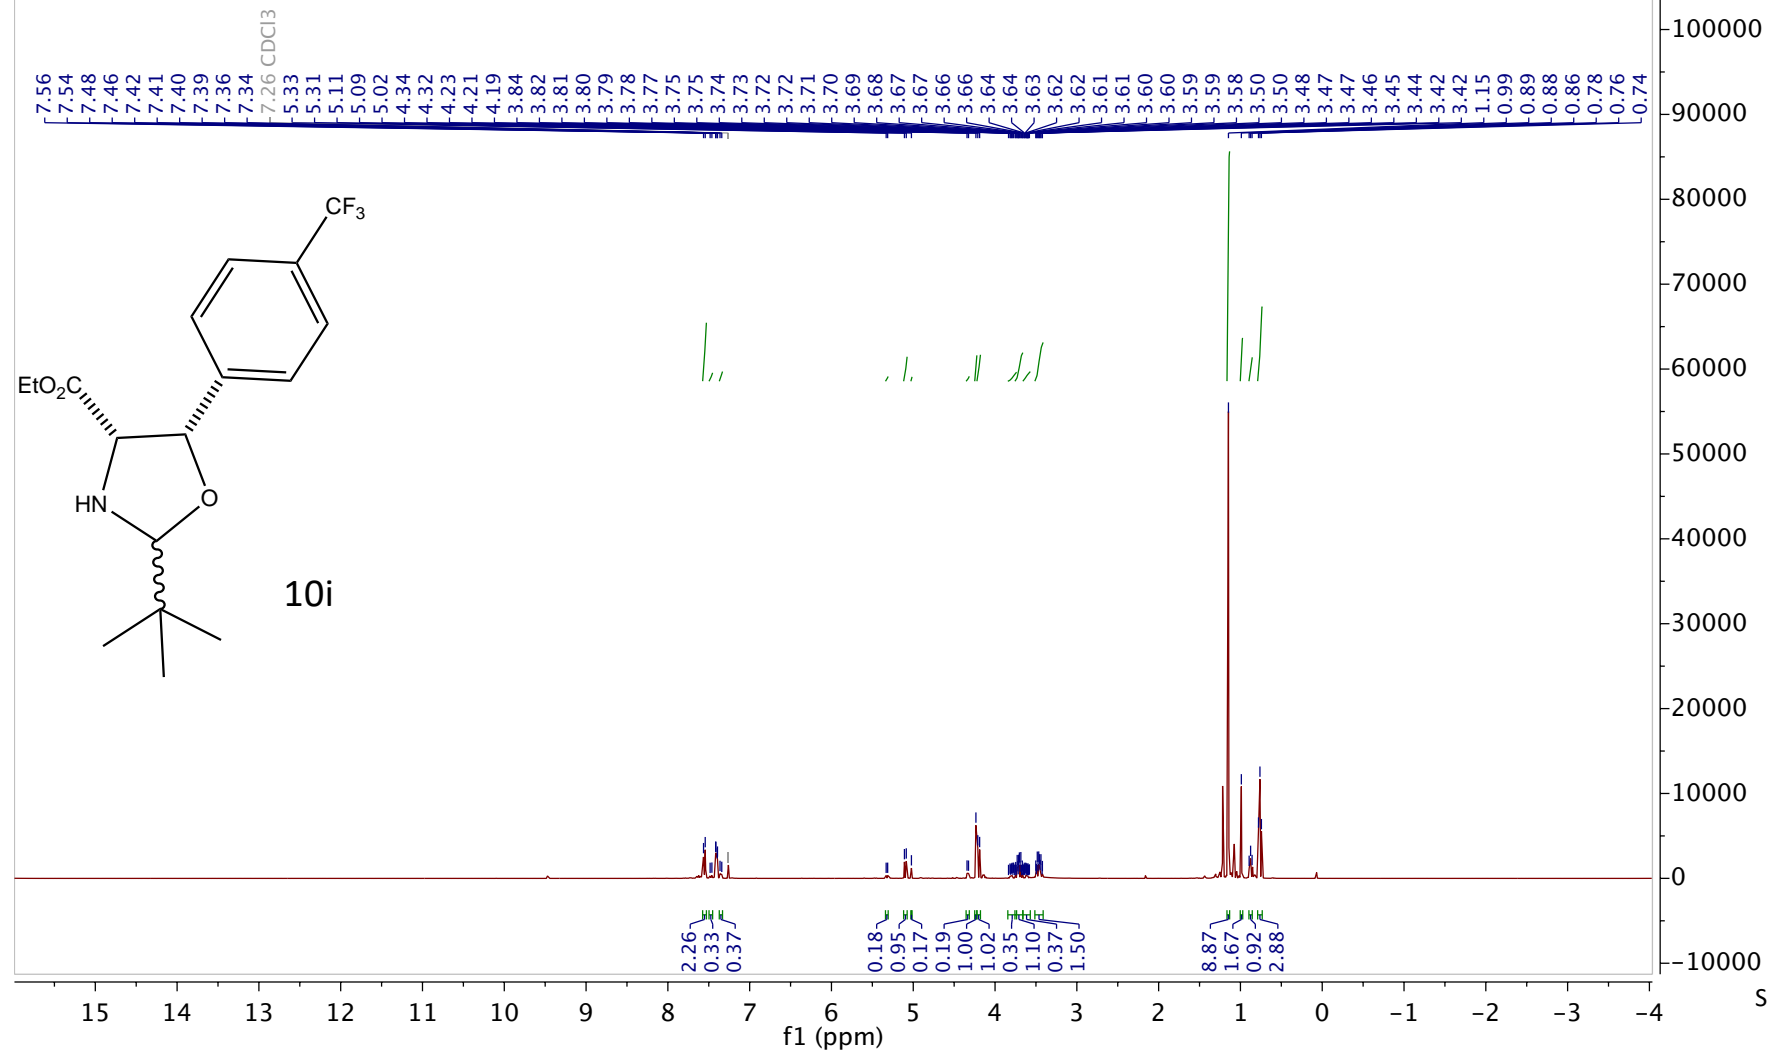

Jan28-2021-10-LS931(C).4.fid  
Instrument AVH400  
Group MGM  
Chemist Liban Saney  
Project Account Code DM7300  
c13acq\_512.crl CDCl3 {C:\NMR} mgmgrp 10

<sup>13</sup>C NMR (101 MHz, CDCl<sub>3</sub>)

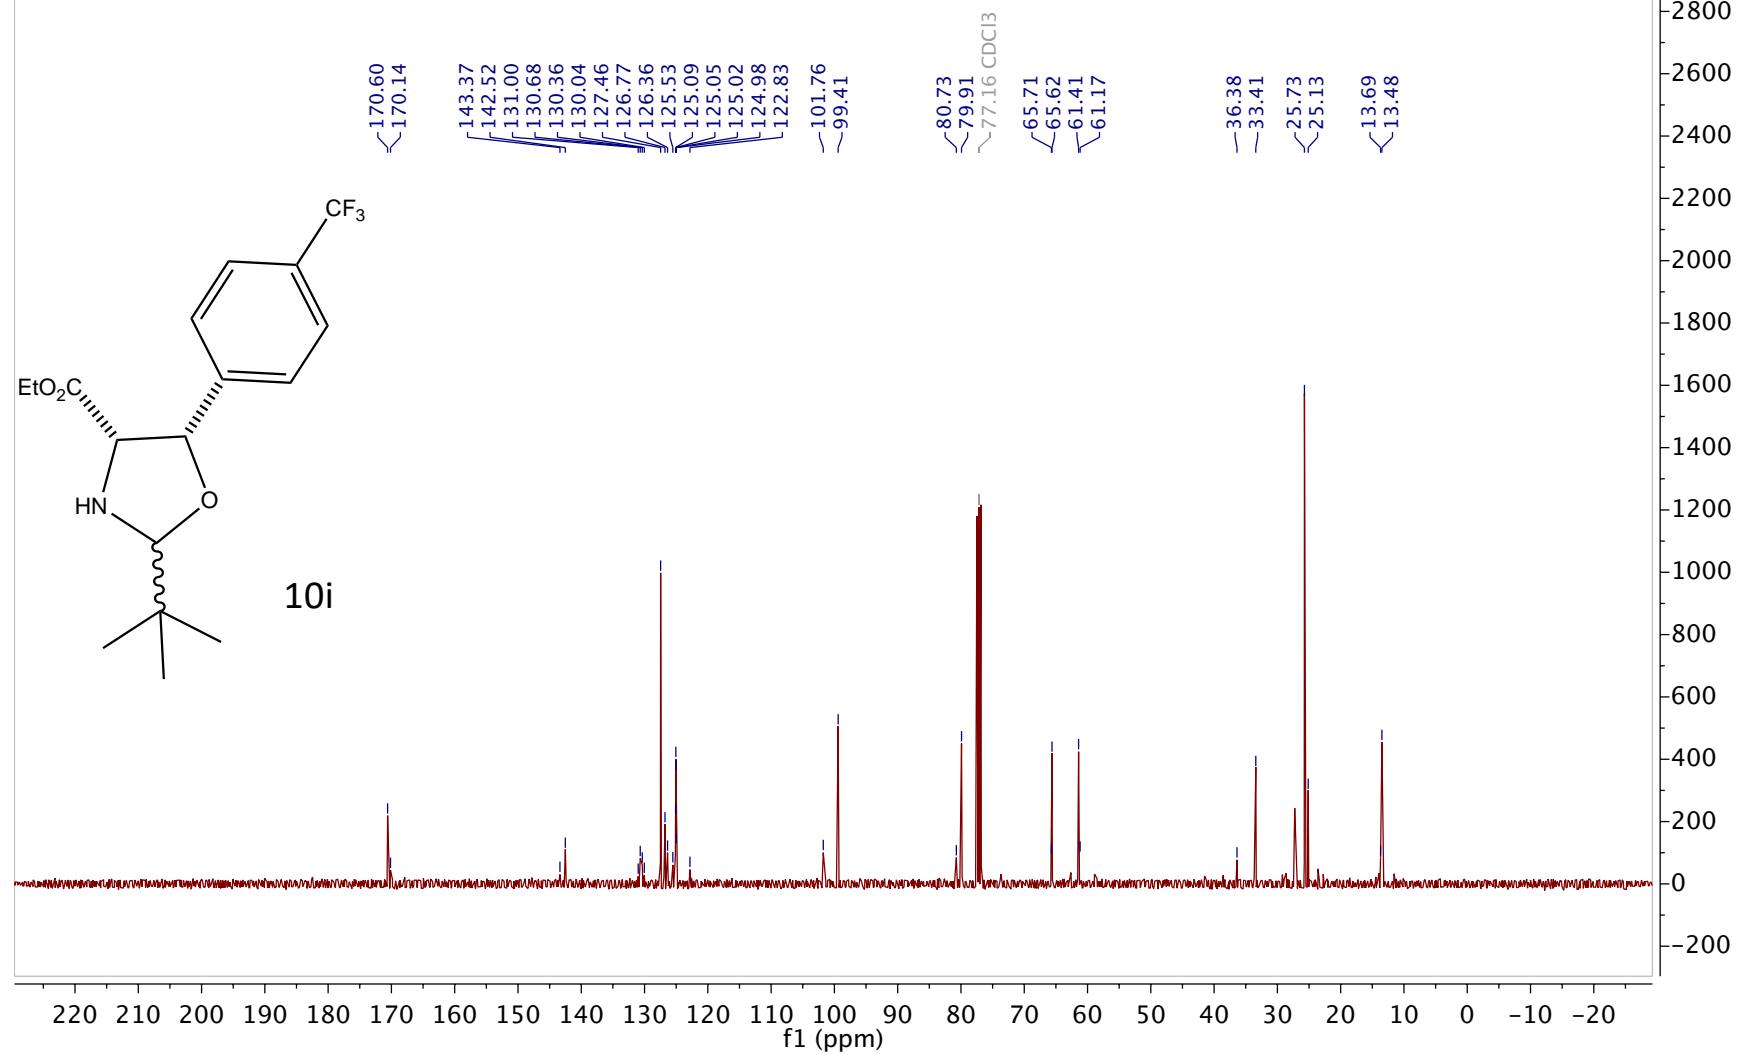

Jan28-2021-10-LS931(C).6.fid  
Instrument AVH400  
Group MGM  
Chemist Liban Saney  
Project Account Code DM7300  
f19dec\_256.crl CDCl3 {C:\NMR} mgmgrp 10

$^{19}\text{F}$  NMR (376 MHz,  $\text{CDCl}_3$ )

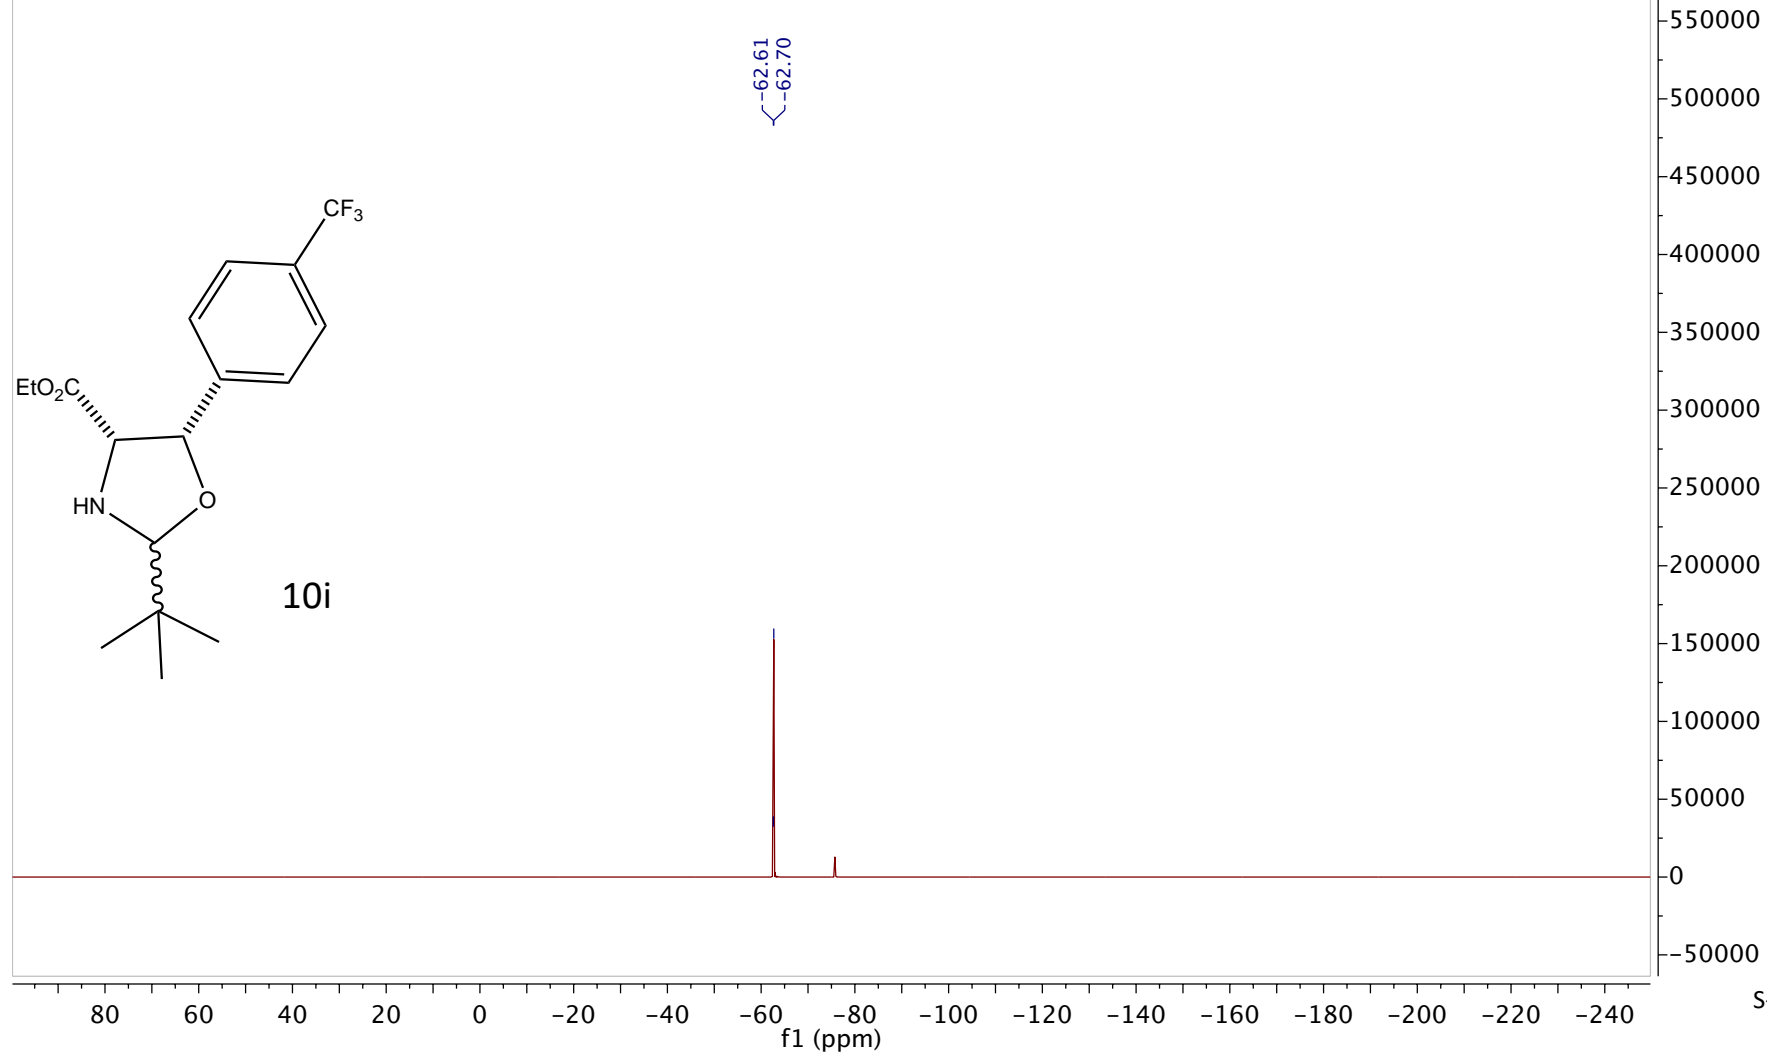

Jan26-2021-5-LS927(C).1.fid  
Instrument AVH400  
Group MGM  
Chemist Liban Saney  
Project Account Code DM7300  
h1acq.crl CDCl3 {C:\NMR} mgmgrp 5

<sup>1</sup>H NMR (400 MHz, CDCl<sub>3</sub>)

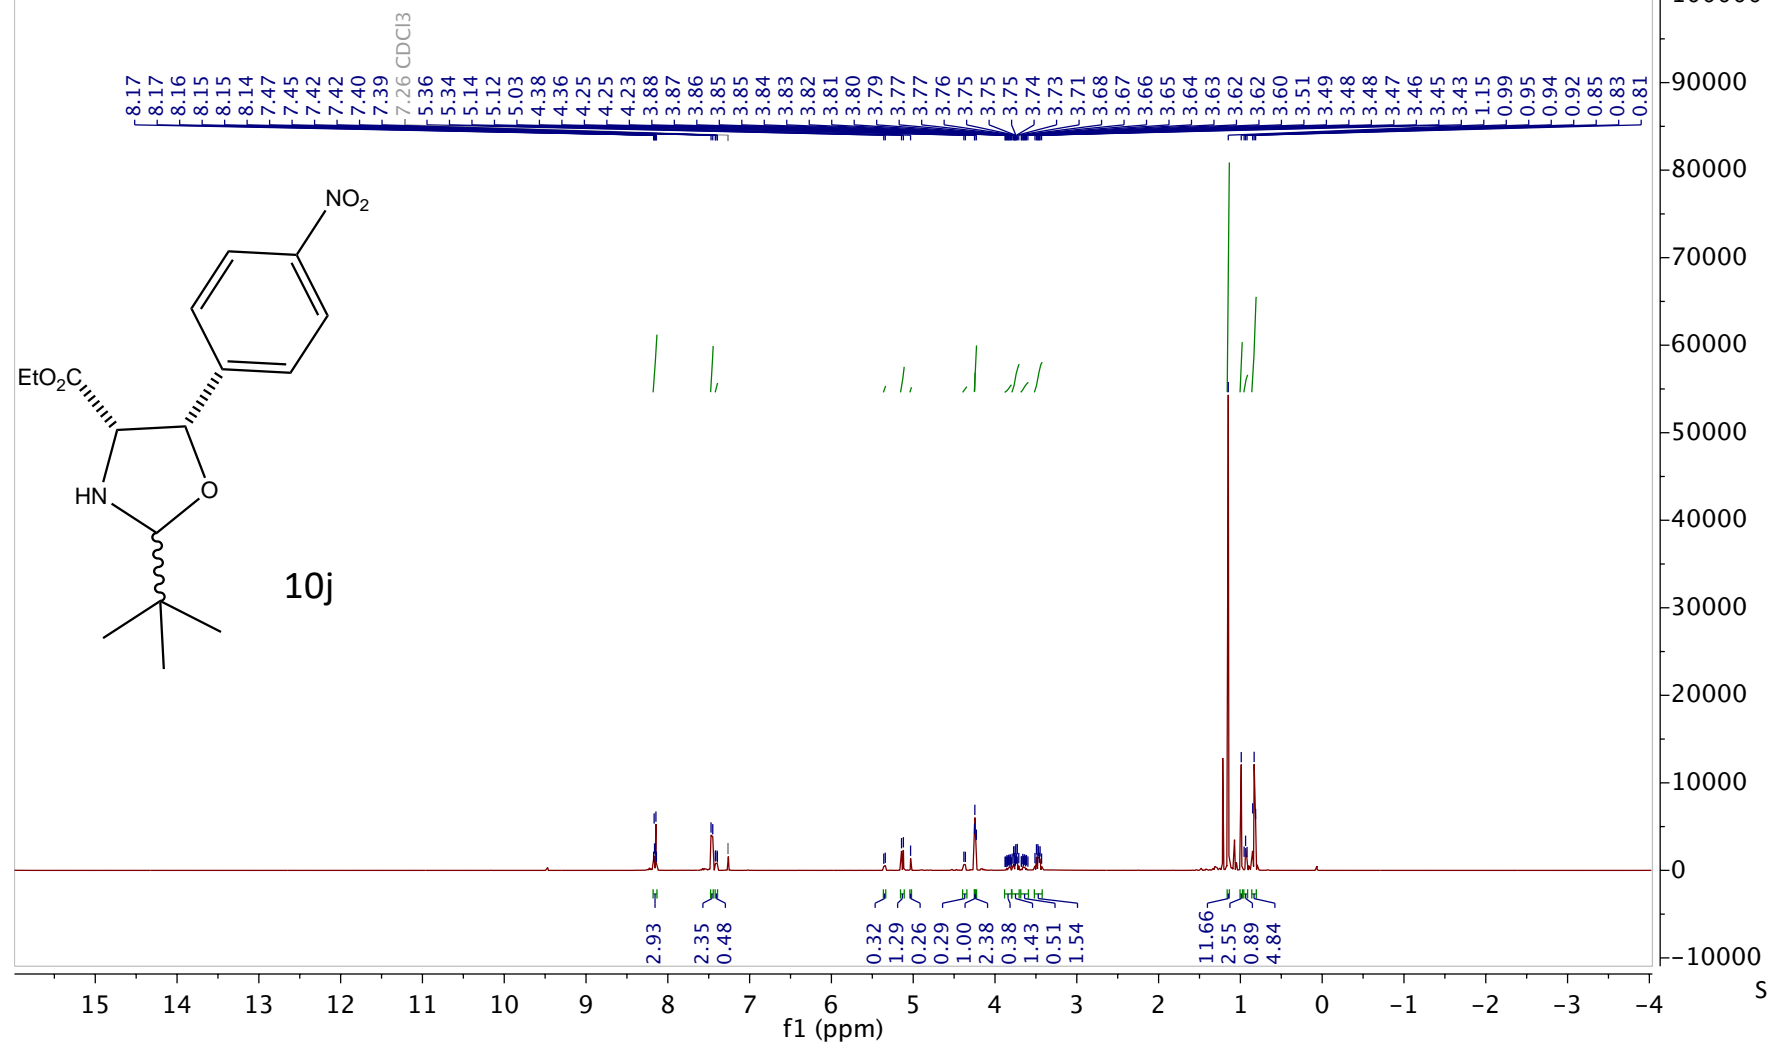



Jan26-2021-5-LS927(C).4.fid

Instrument AVH400

Group MGM

Chemist Liban Saney

Project Account Code DM7300

c13acq\_512.crl CDCl3 {C:\NMR} mgmgrp 5

$^{13}\text{C}$  NMR (101 MHz,  $\text{CDCl}_3$ )

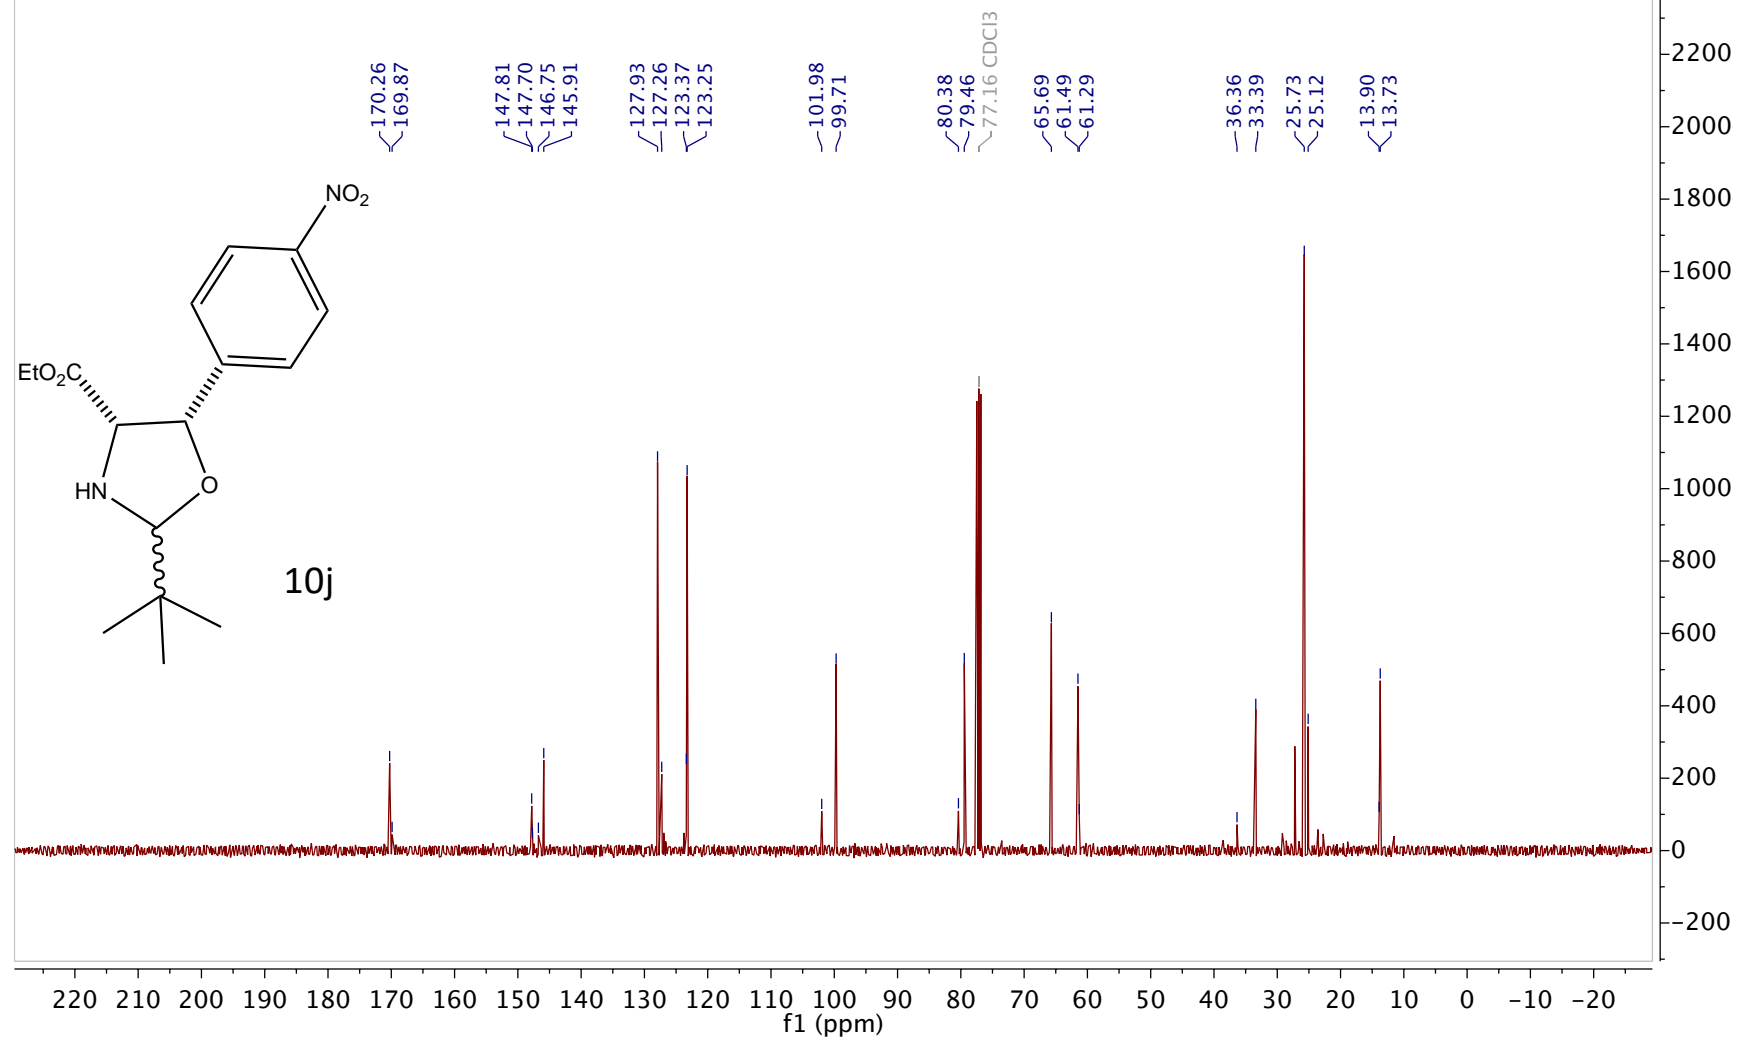

Feb04-2021-16-LS940(C).1.fid  
Instrument AVH400  
Group MGM  
Chemist Liban Saney  
Project Account Code DM7300  
h1acq.crl CDCl3 {C:\NMR} mgmgrp 16

# <sup>1</sup>H NMR (400 MHz, CDCl<sub>3</sub>)

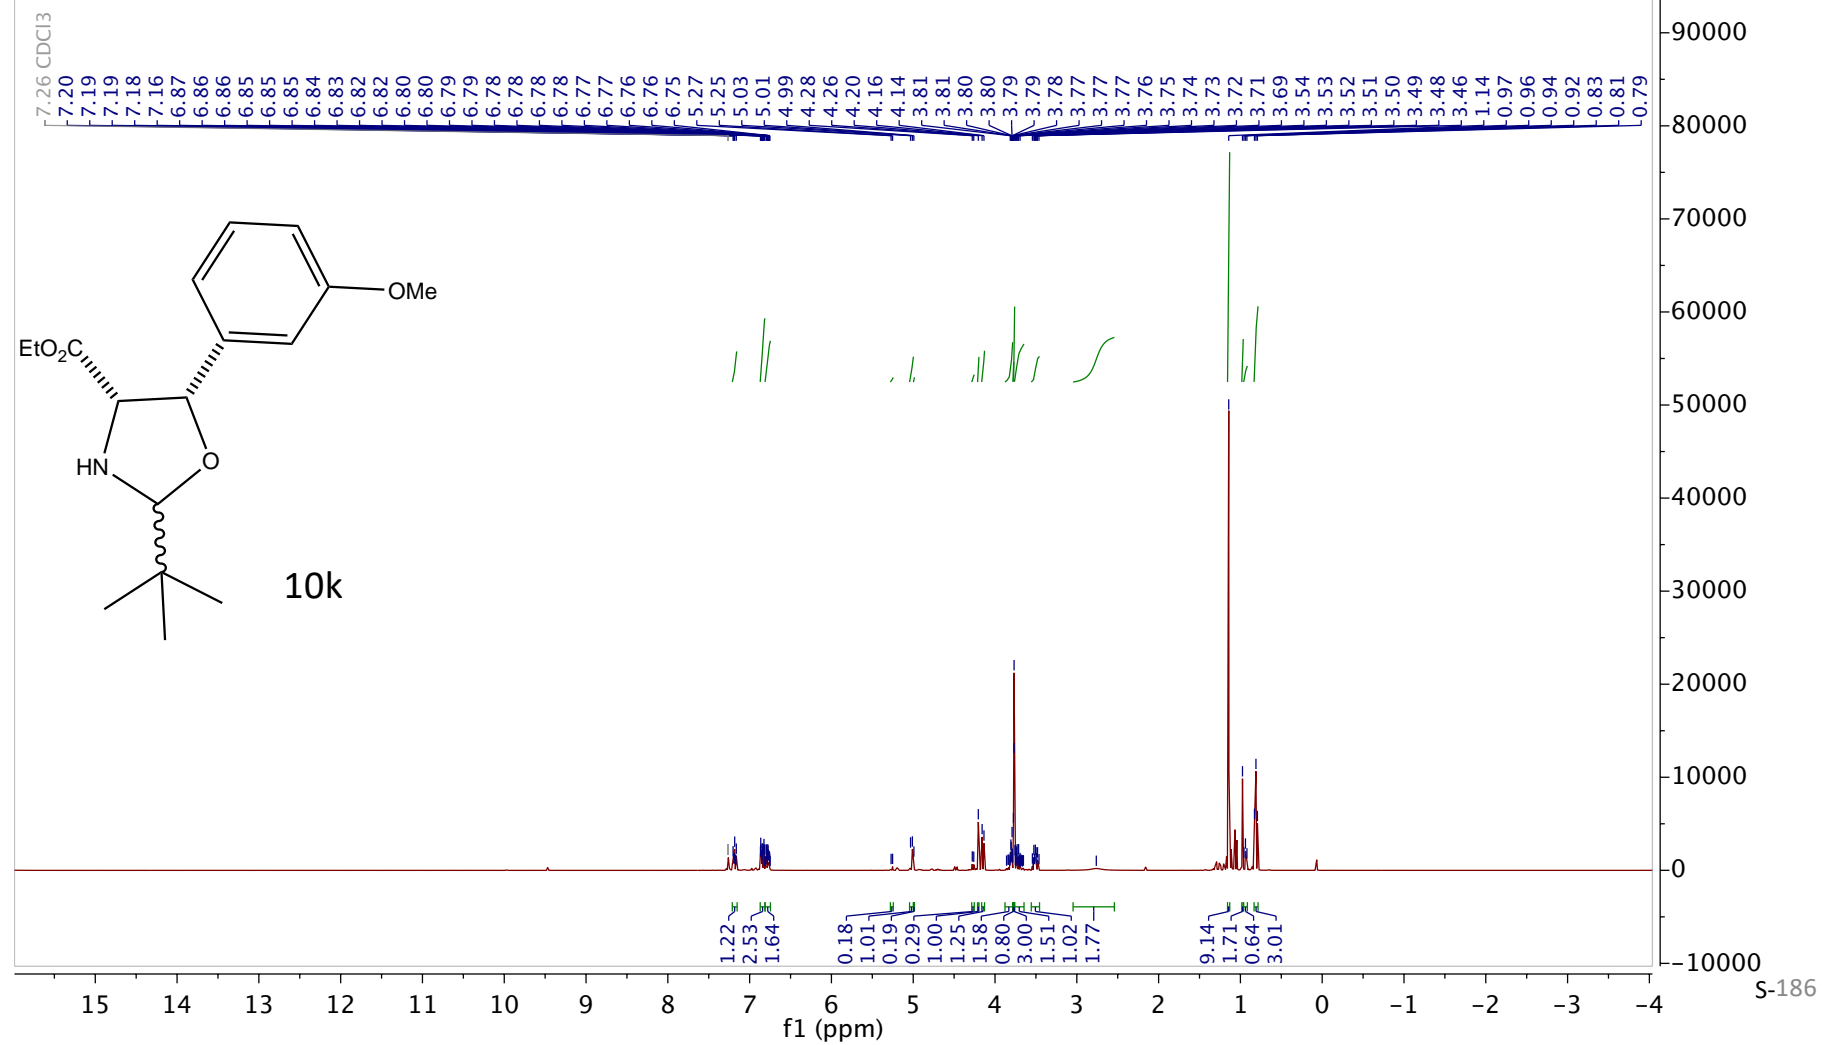

Feb04-2021-16-LS940(C).4.fid

Instrument AVH400

Group MGM

Chemist Liban Saney

Project Account Code DM7300

c13acq\_512.crl CDCl3 {C:\NMR} mgmgrp 16

<sup>13</sup>C NMR (101 MHz, CDCl<sub>3</sub>)

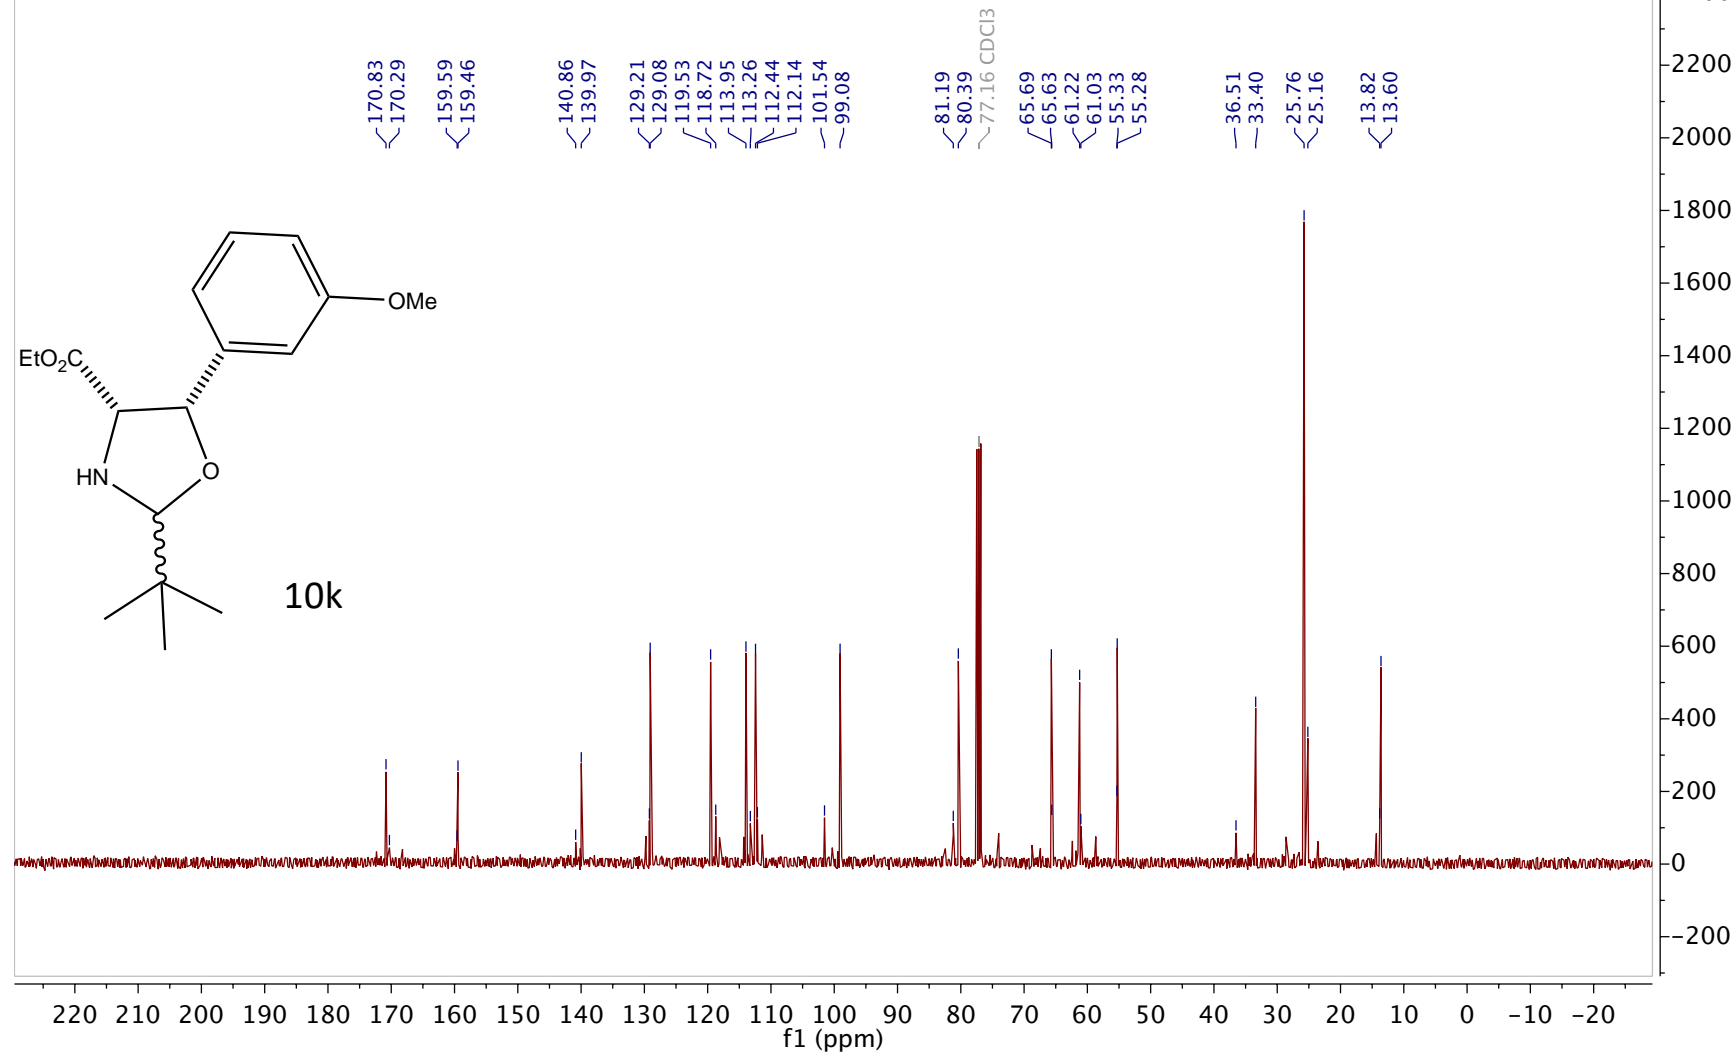

Jan31-2021-8-LS935(C).1.fid  
Instrument AVH400  
Group MGM  
Chemist Liban Saney  
Project Account Code DM7300  
h1acq.crl CDCl3 {C:\NMR} mgmgrp 8

<sup>1</sup>H NMR (400 MHz, CDCl<sub>3</sub>)

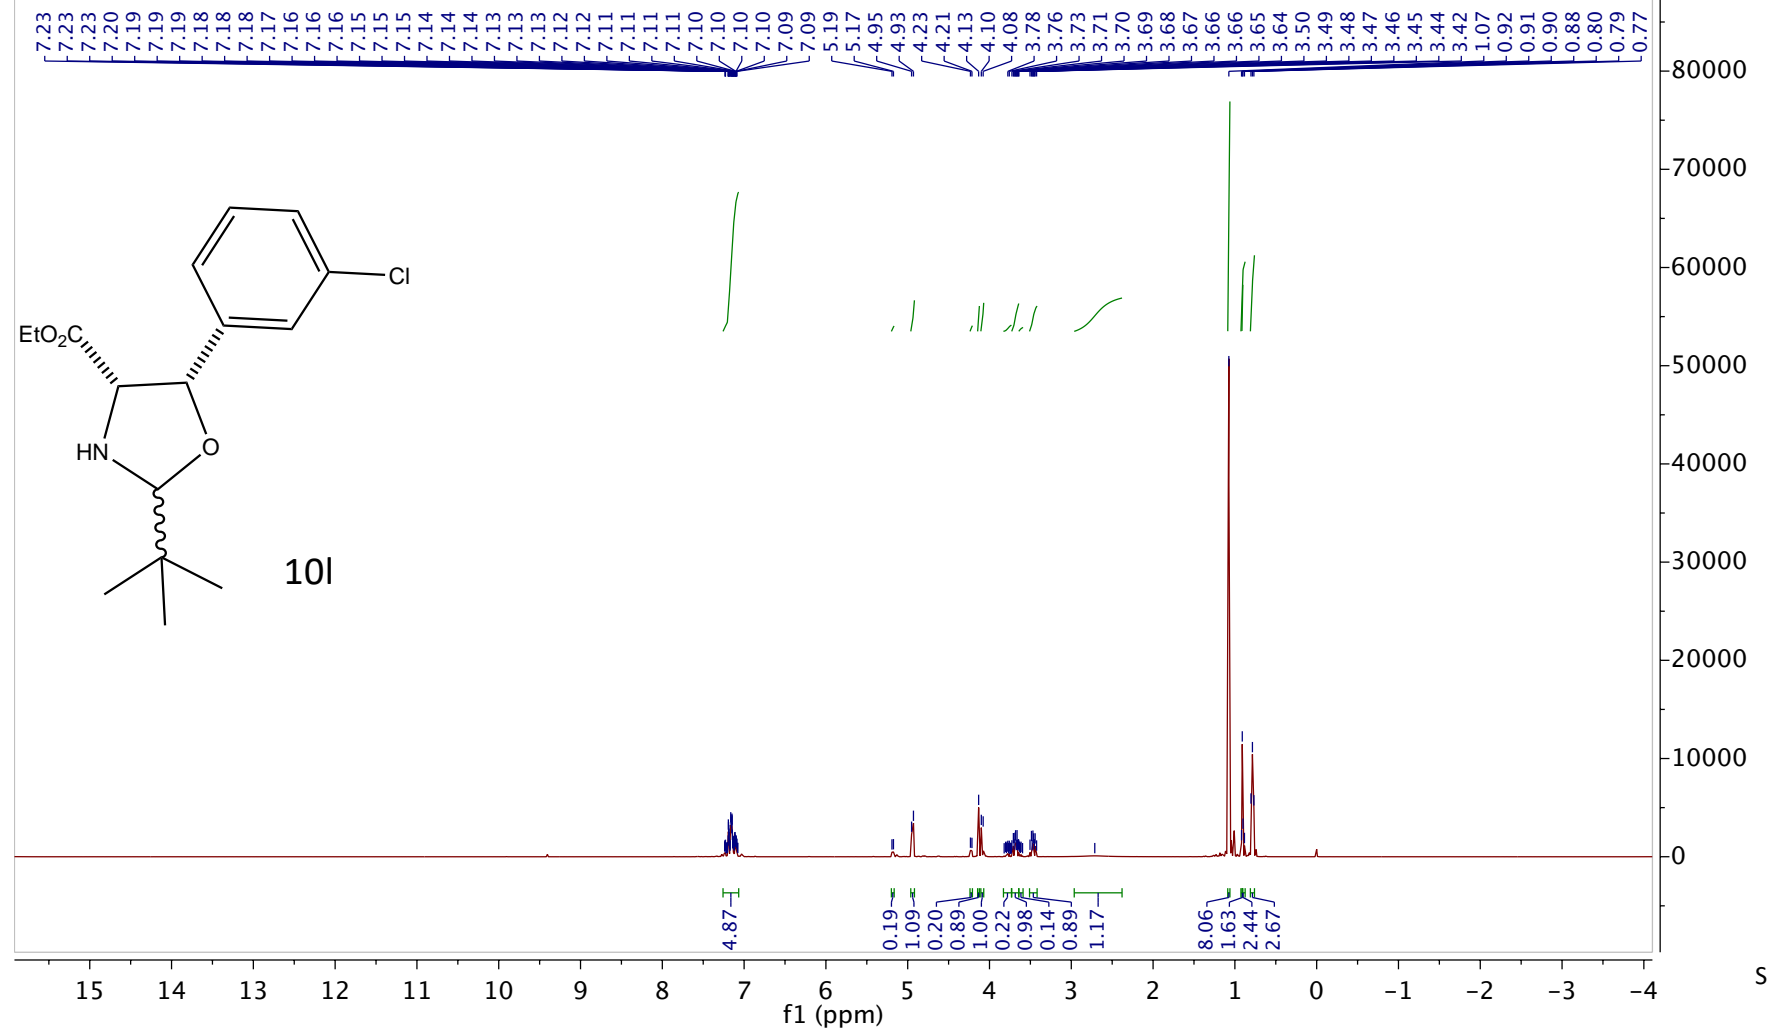

Jan31-2021-8-LS935(C).4.fid  
Instrument AVH400  
Group MGM  
Chemist Liban Saney  
Project Account Code DM7300  
c13acq\_512.crl CDCl3 {C:\NMR} mgmgrp 8

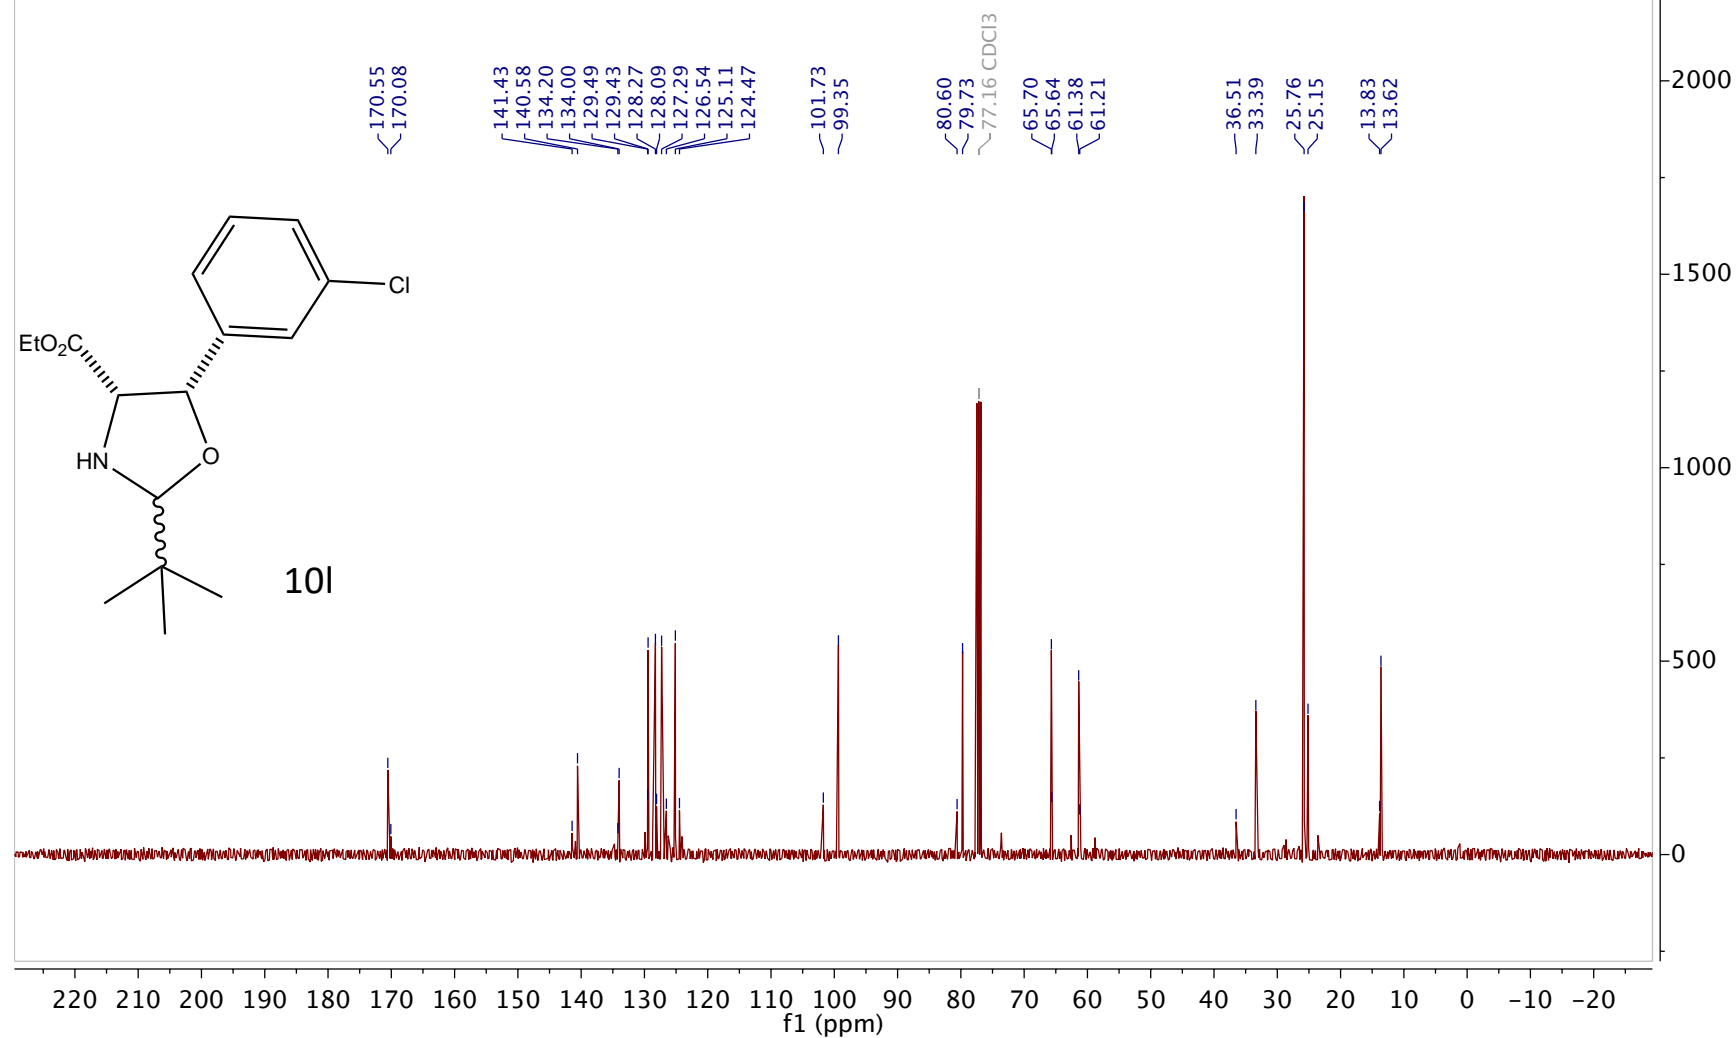

Feb16-2021-55-LS954(C).1.fid  
Instrument AVH400  
Group MGM  
Chemist Liban Saney  
Project Account Code DM7300  
h1acq.crl CDCl3 {C:\NMR} mgmgrp 55

<sup>1</sup>H NMR (400 MHz, CDCl<sub>3</sub>)

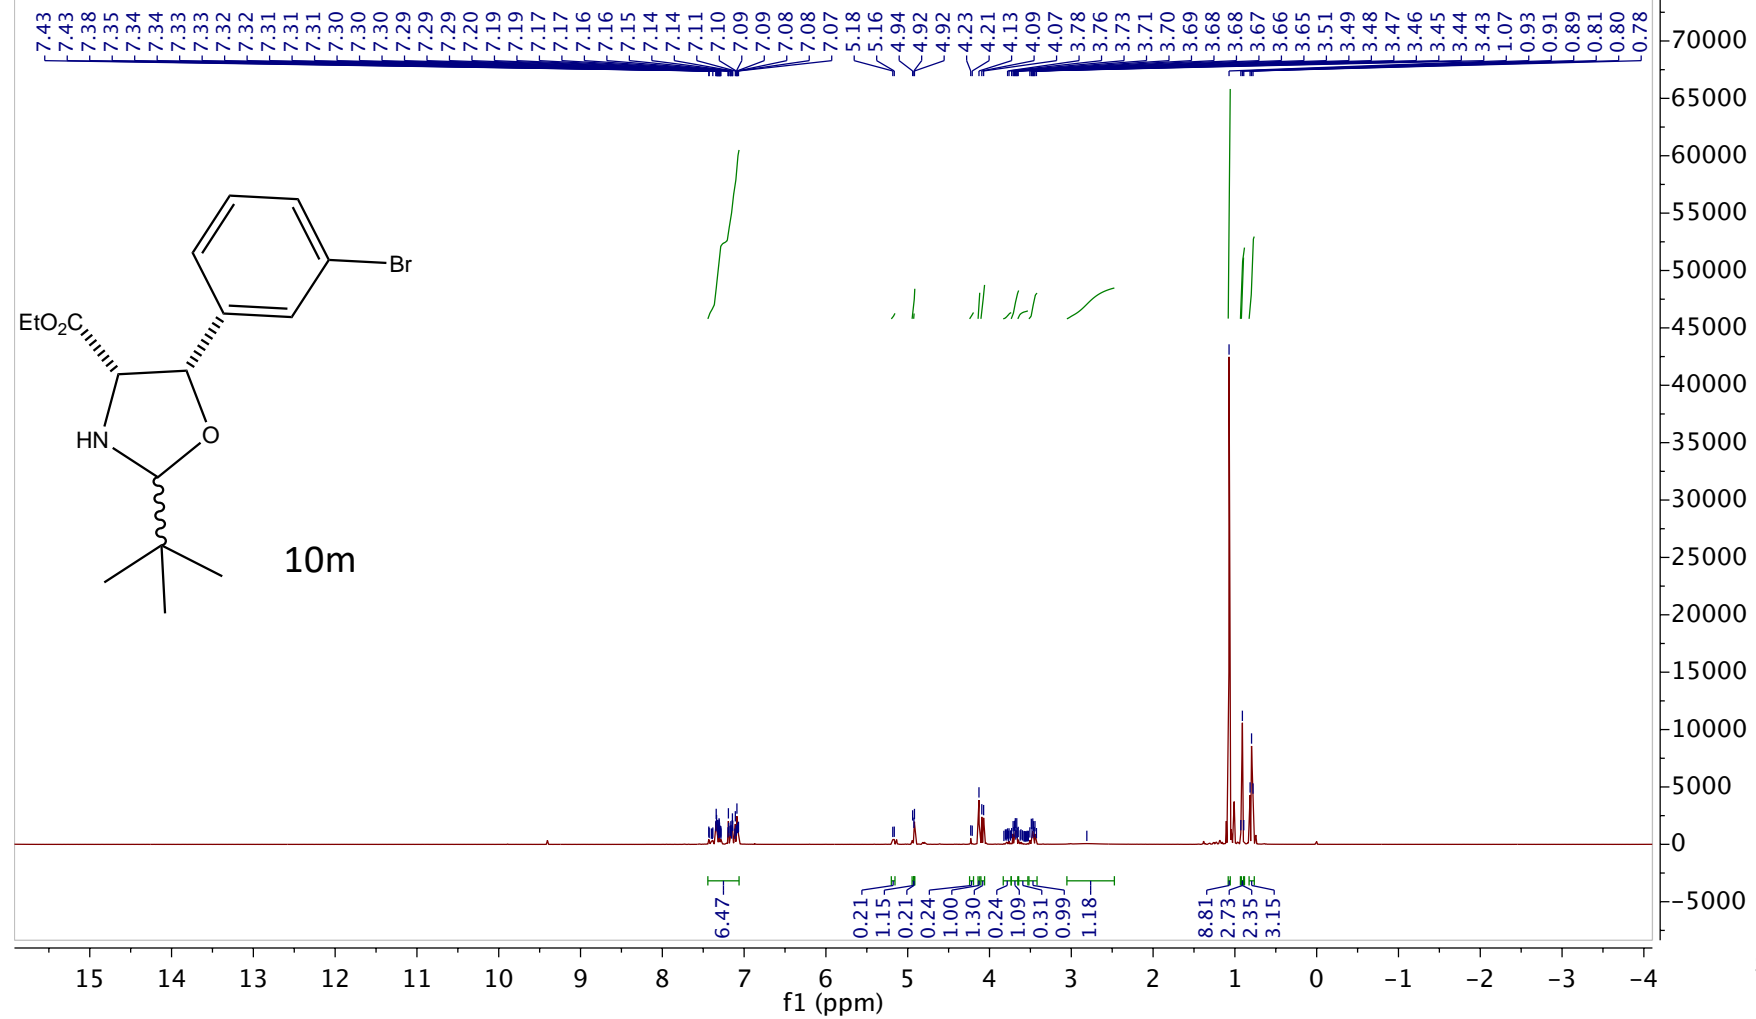

Feb16-2021-55-LS954(C).4.fid

Instrument AVH400

Group MGM

Chemist Liban Saney

Project Account Code DM7300

c13acq\_512.crl CDCl3 {C:\NMR} mgmgrp 55

<sup>13</sup>C NMR (101 MHz, CDCl<sub>3</sub>)

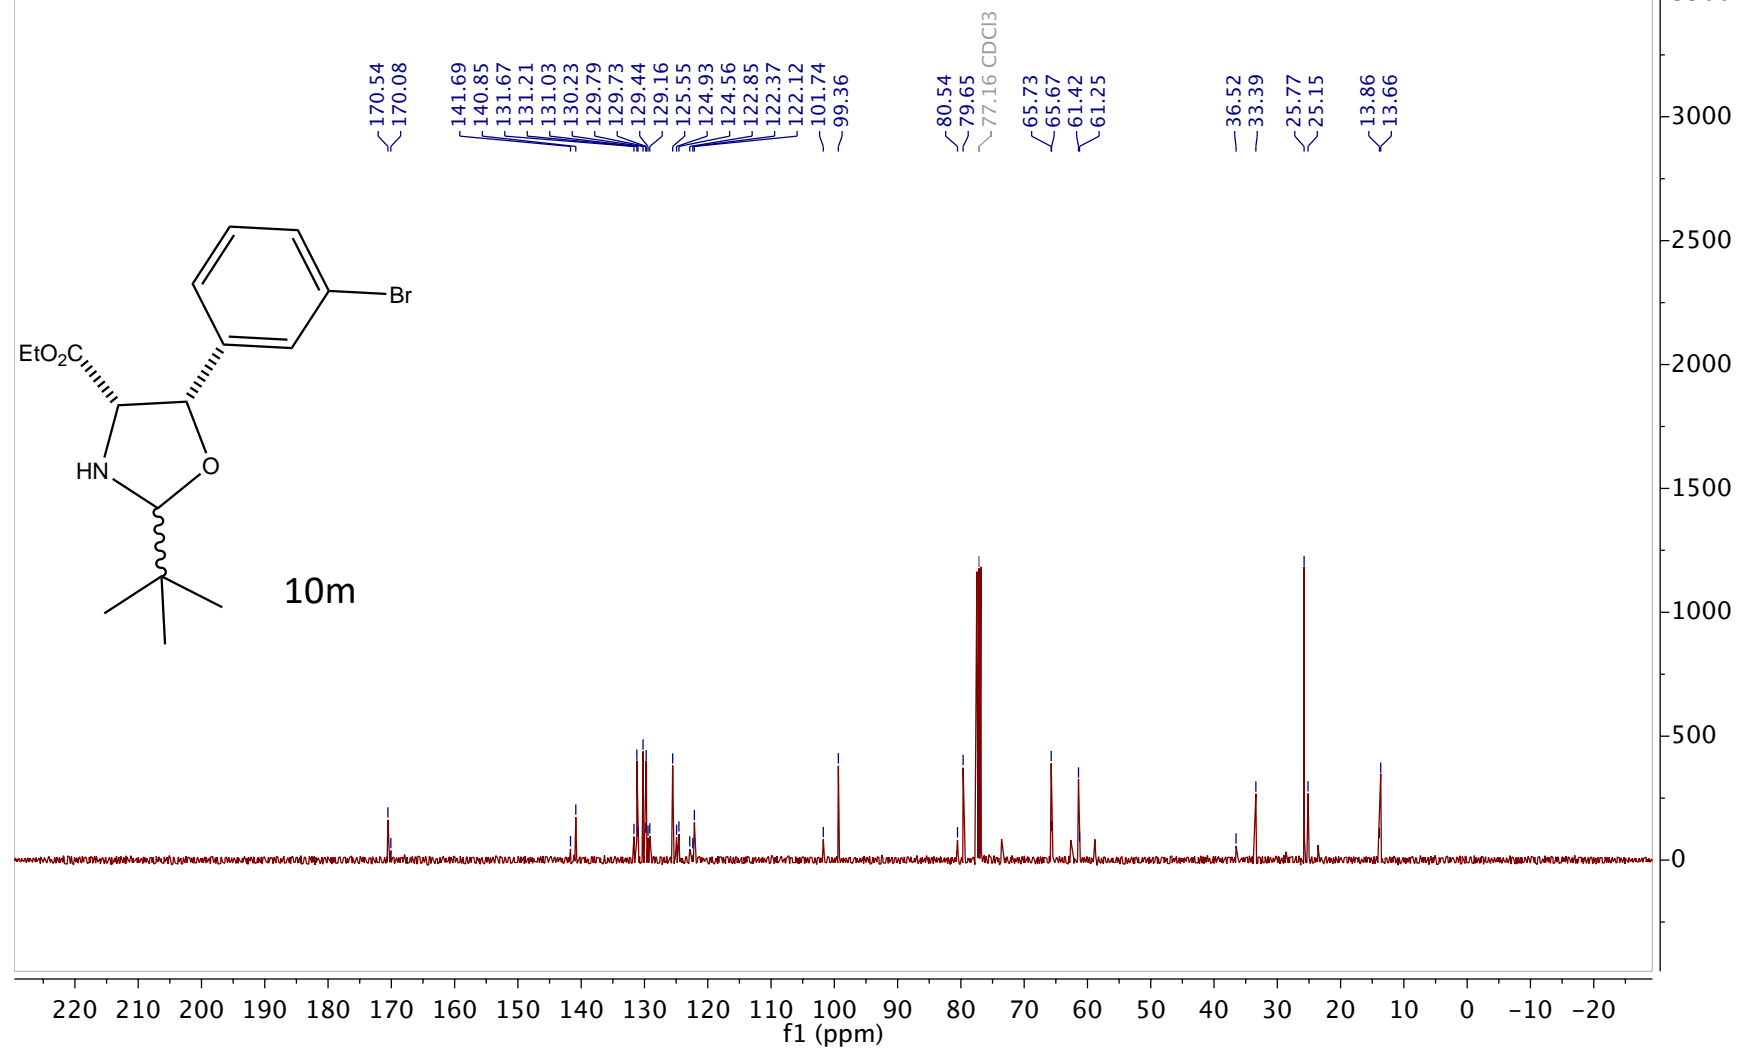

Jan28-2021-7-LS930(C).1.fid  
Instrument AVH400  
Group MGM  
Chemist Liban Saney  
Project Account Code DM7300  
h1acq.crl CDCl3 {C:\NMR} mgmgrp 7

<sup>1</sup>H NMR (400 MHz, CDCl<sub>3</sub>)

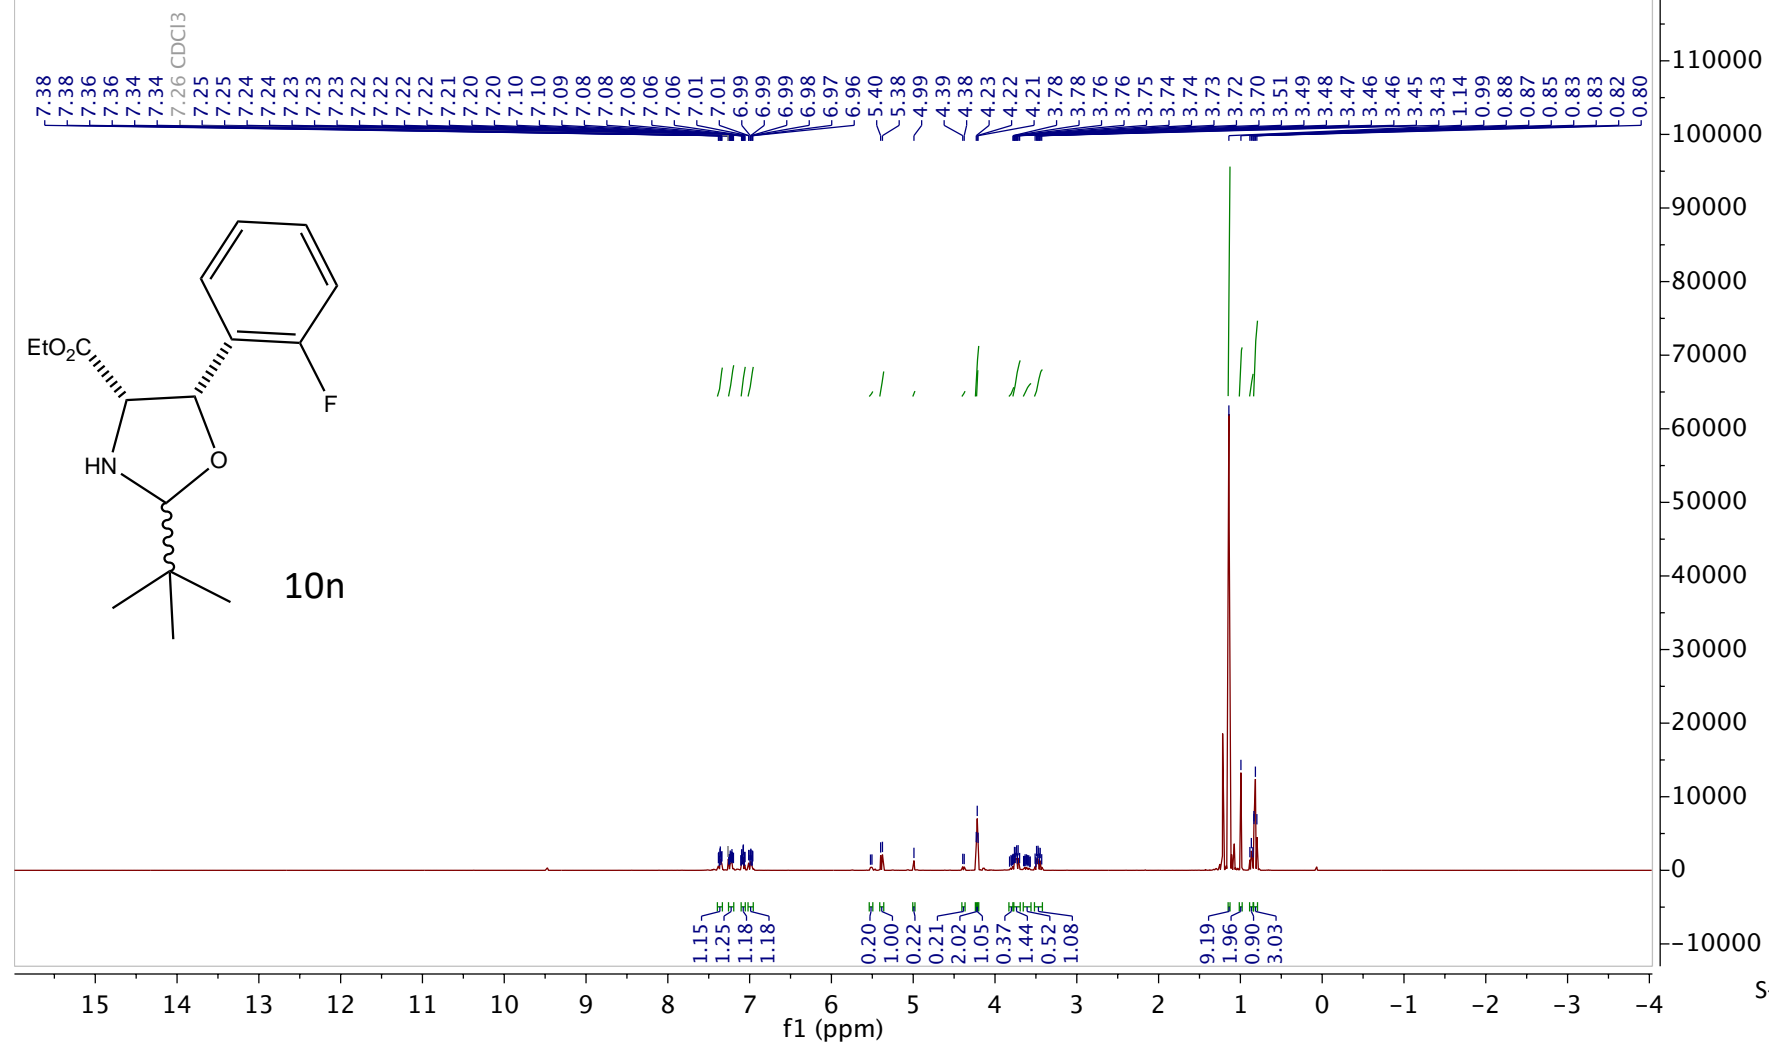



Jan28-2021-7-LS930(C).4.fid

Instrument AVH400

Group MGM

Chemist Liban Saney

Project Account Code DM7300

c13acq\_512.crl CDCl3 {C:\NMR} mgmgrp 7

$^{13}\text{C}$  NMR (101 MHz,  $\text{CDCl}_3$ )

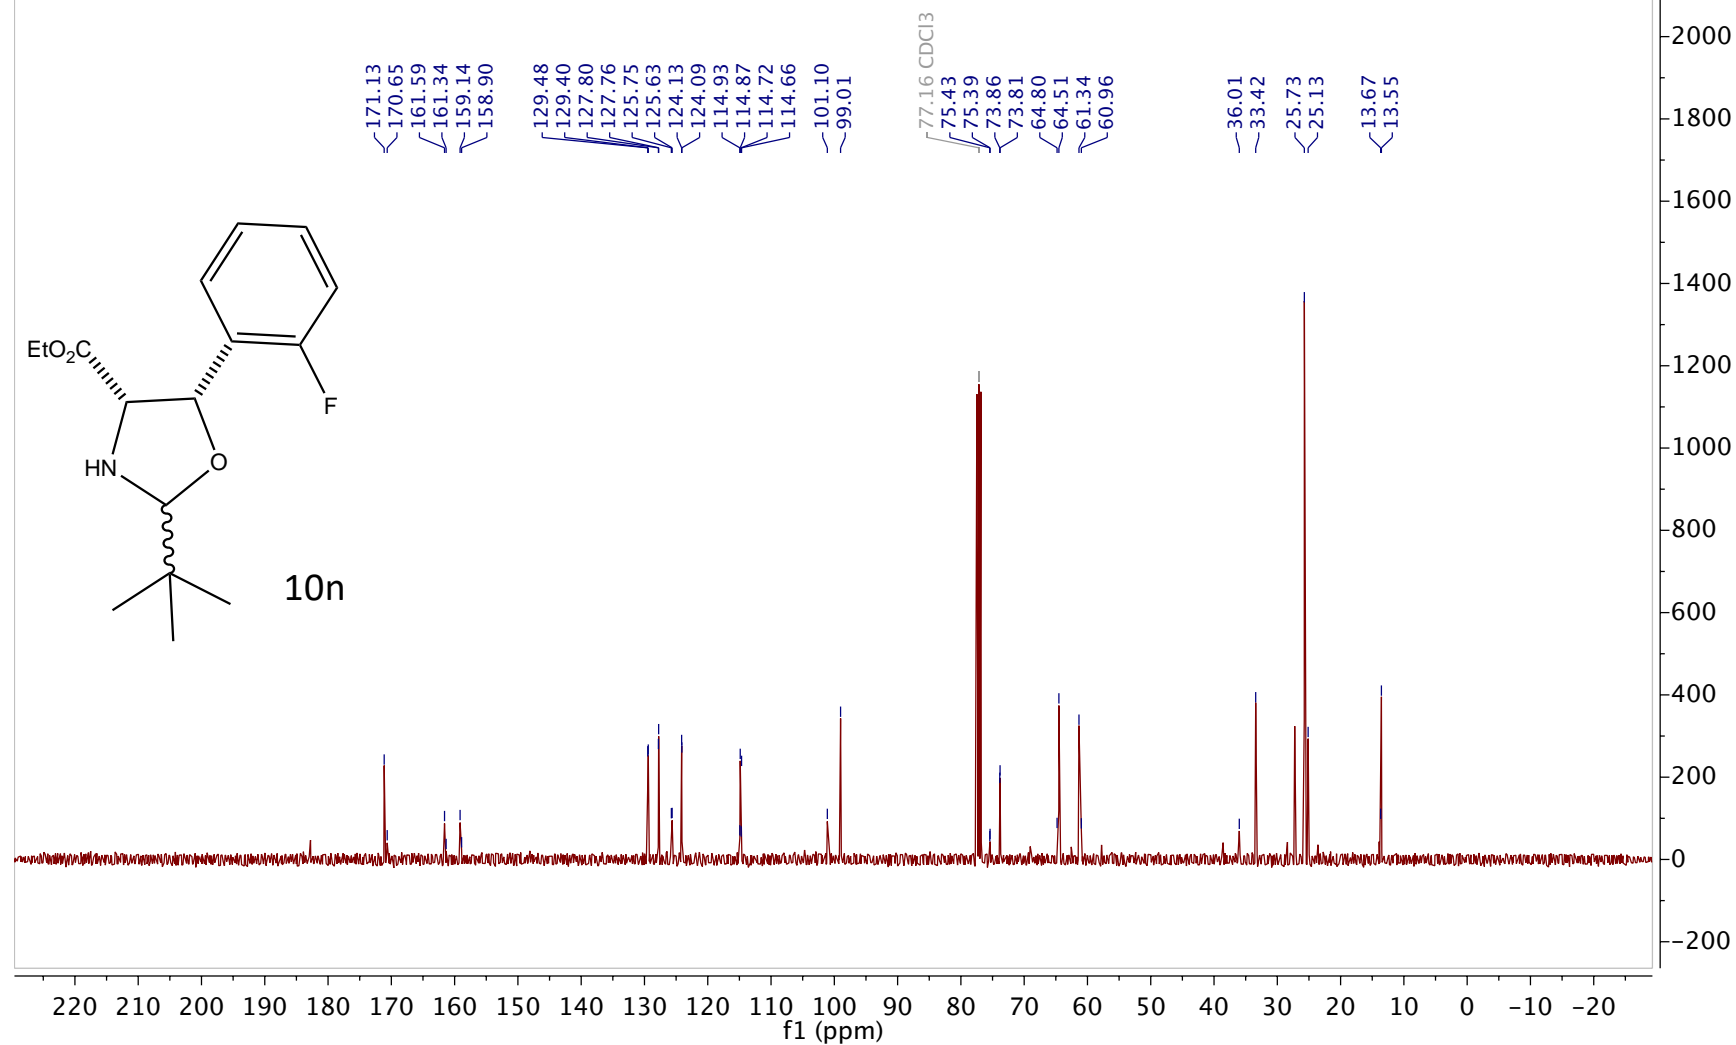

Jan28-2021-7-LS930(C).6.fid  
Instrument AVH400  
Group MGM  
Chemist Liban Saney  
Project Account Code DM7300  
f19dec\_256.crl CDCl3 {C:\NMR} mgmgrp 7

$^{19}\text{F}$  NMR (376 MHz,  $\text{CDCl}_3$ )

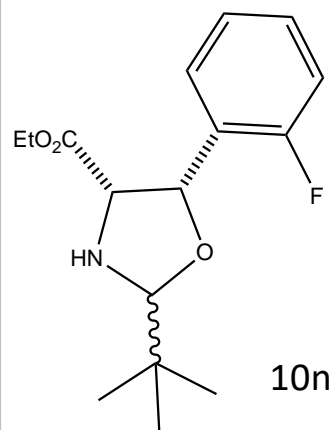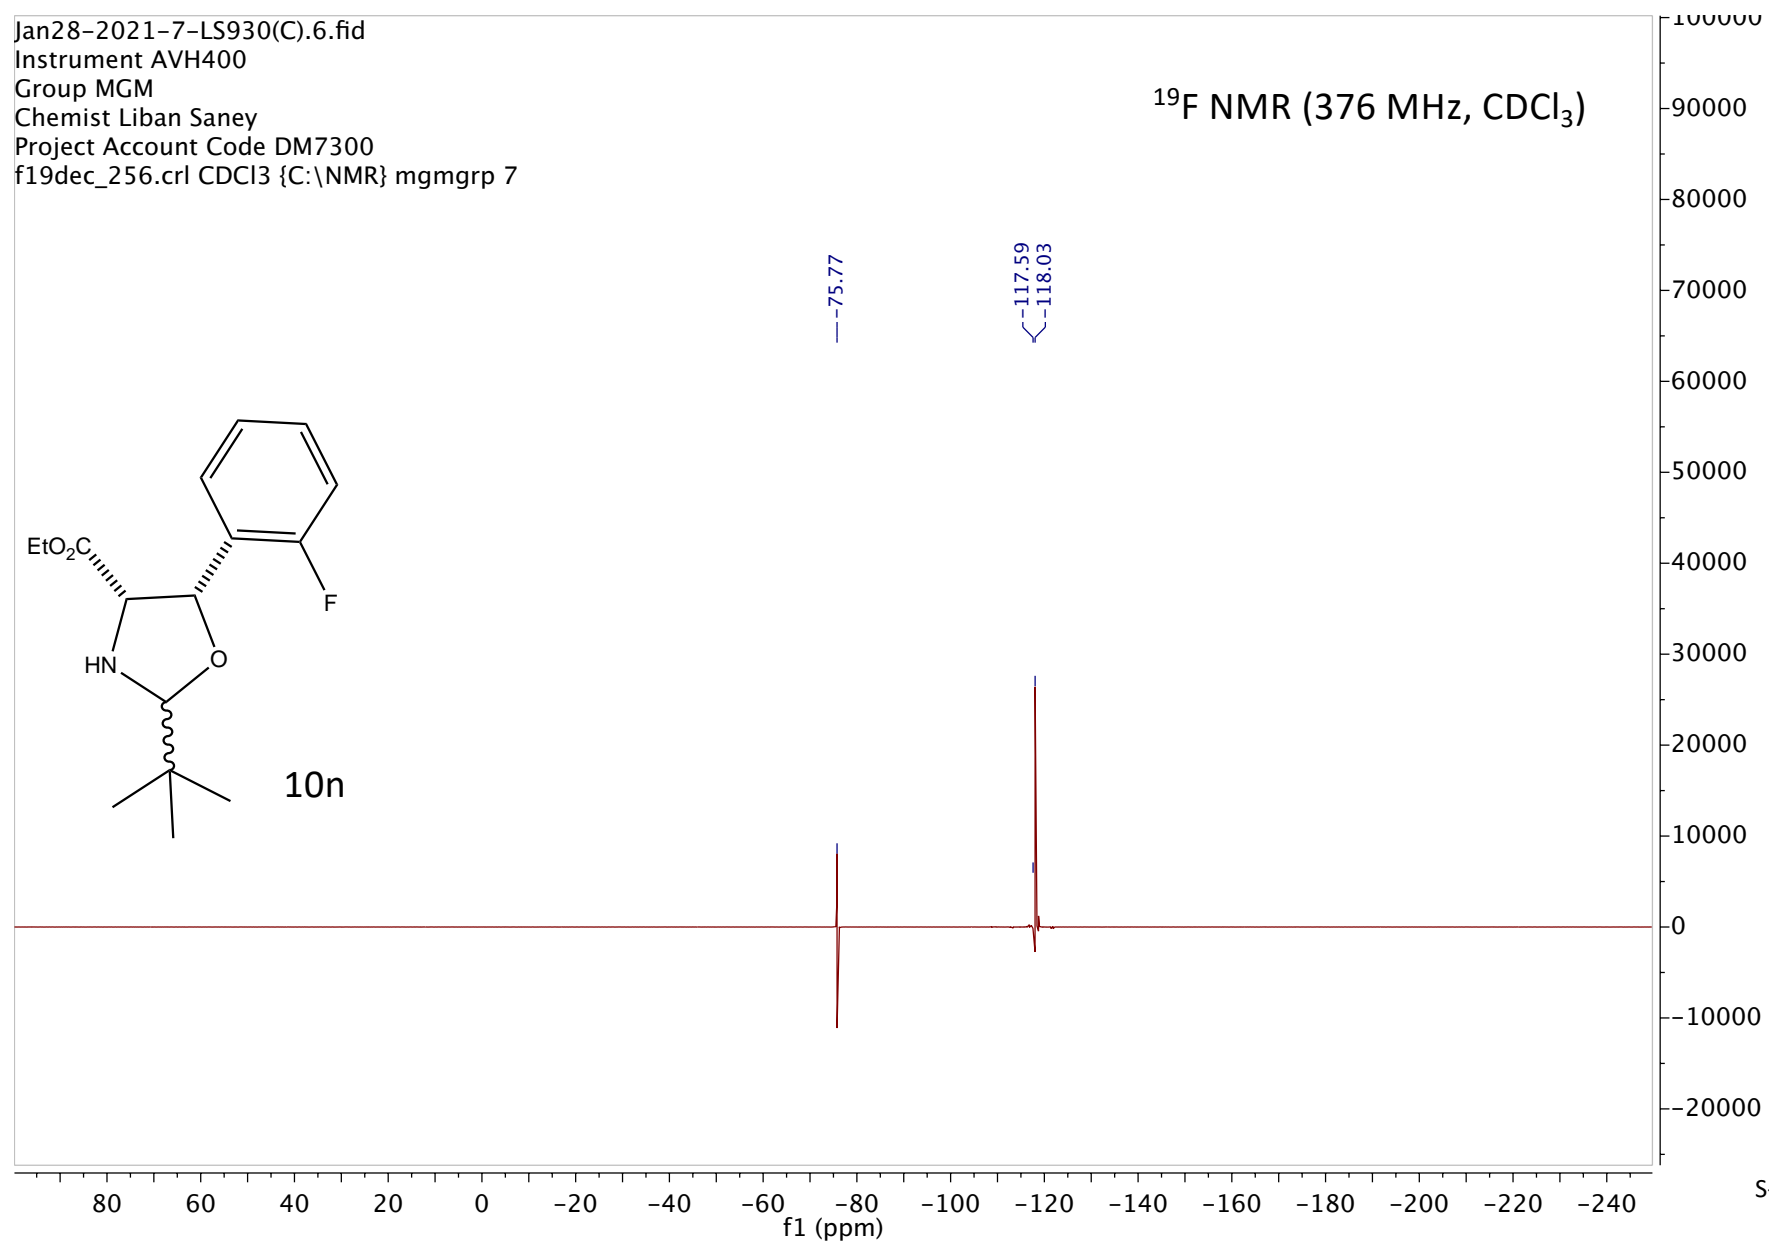

Feb16-2021-54-LS953(C).1.fid  
Instrument AVH400  
Group MGM  
Chemist Liban Saney  
Project Account Code DM7300  
h1acq.crl CDCl3 {C:\NMR} mgmgrp 54

<sup>1</sup>H NMR (400 MHz, CDCl<sub>3</sub>)

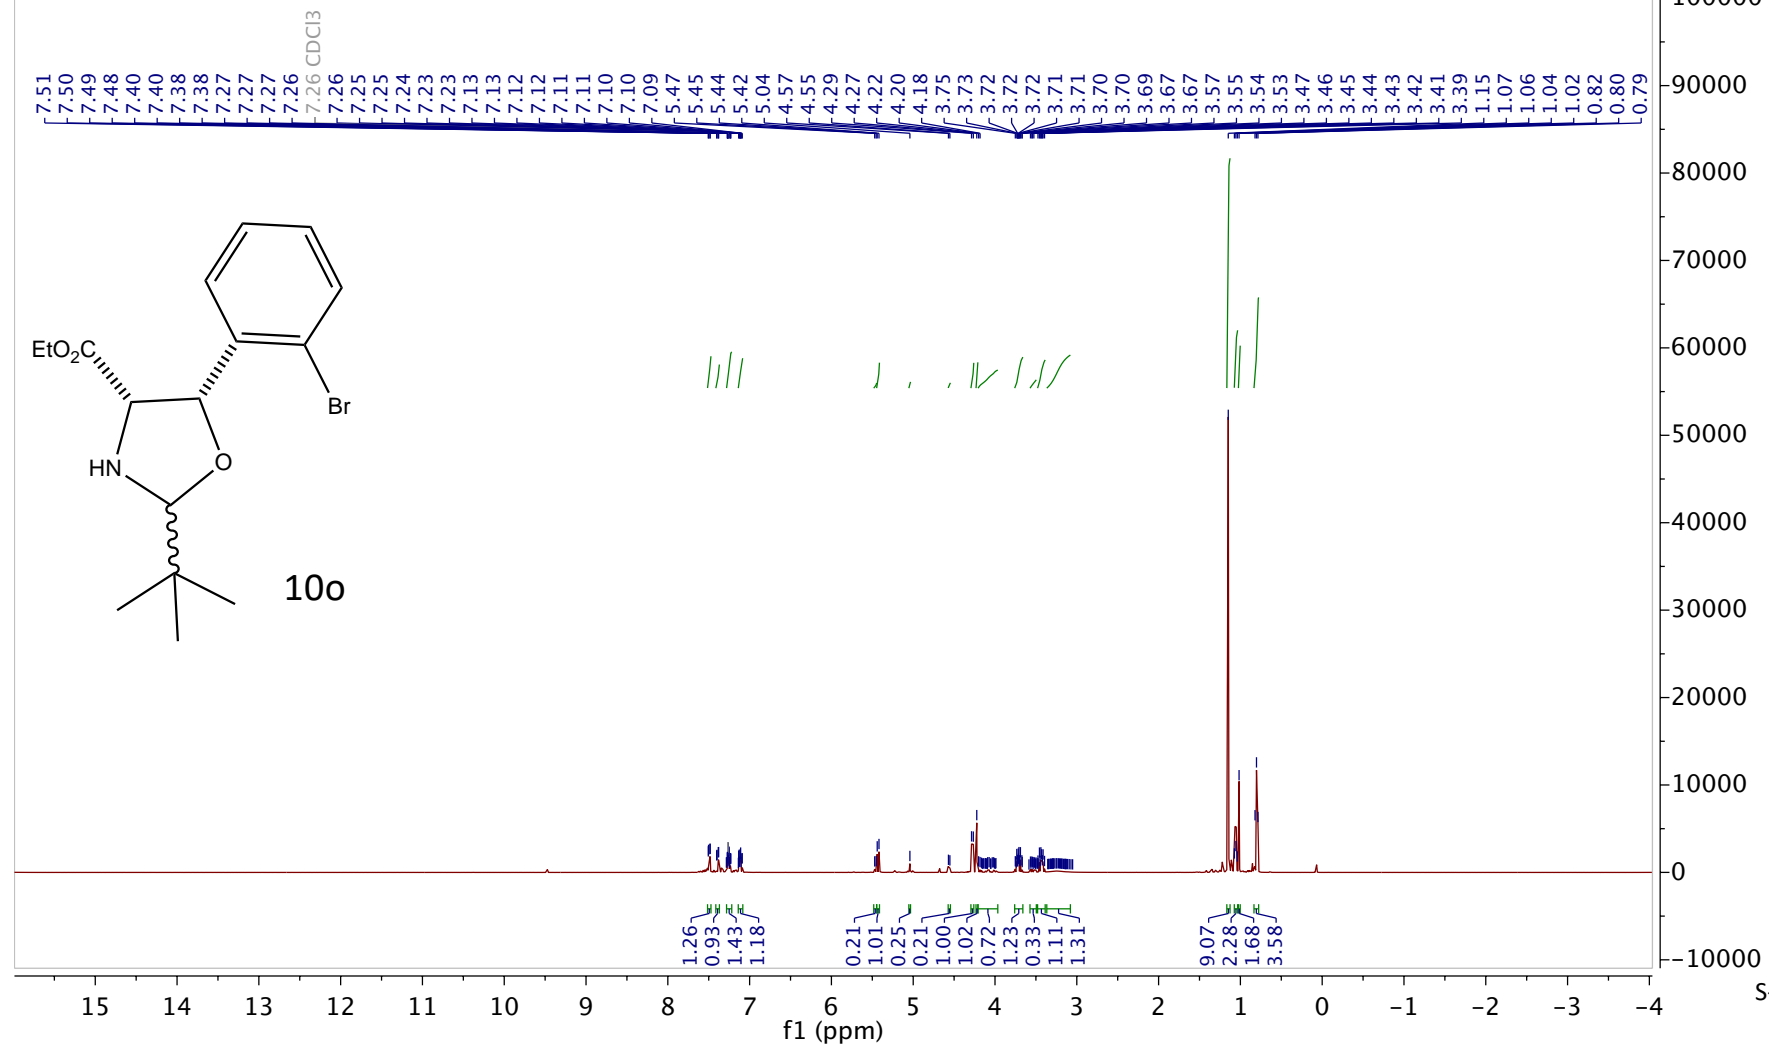

Feb16-2021-54-LS953(C).4.fid

Instrument AVH400

Group MGM

Chemist Liban Saney

Project Account Code DM7300

c13acq\_512.crl CDCl3 {C:\NMR} mgmgrp 54

$^{13}\text{C}$  NMR (101 MHz,  $\text{CDCl}_3$ )

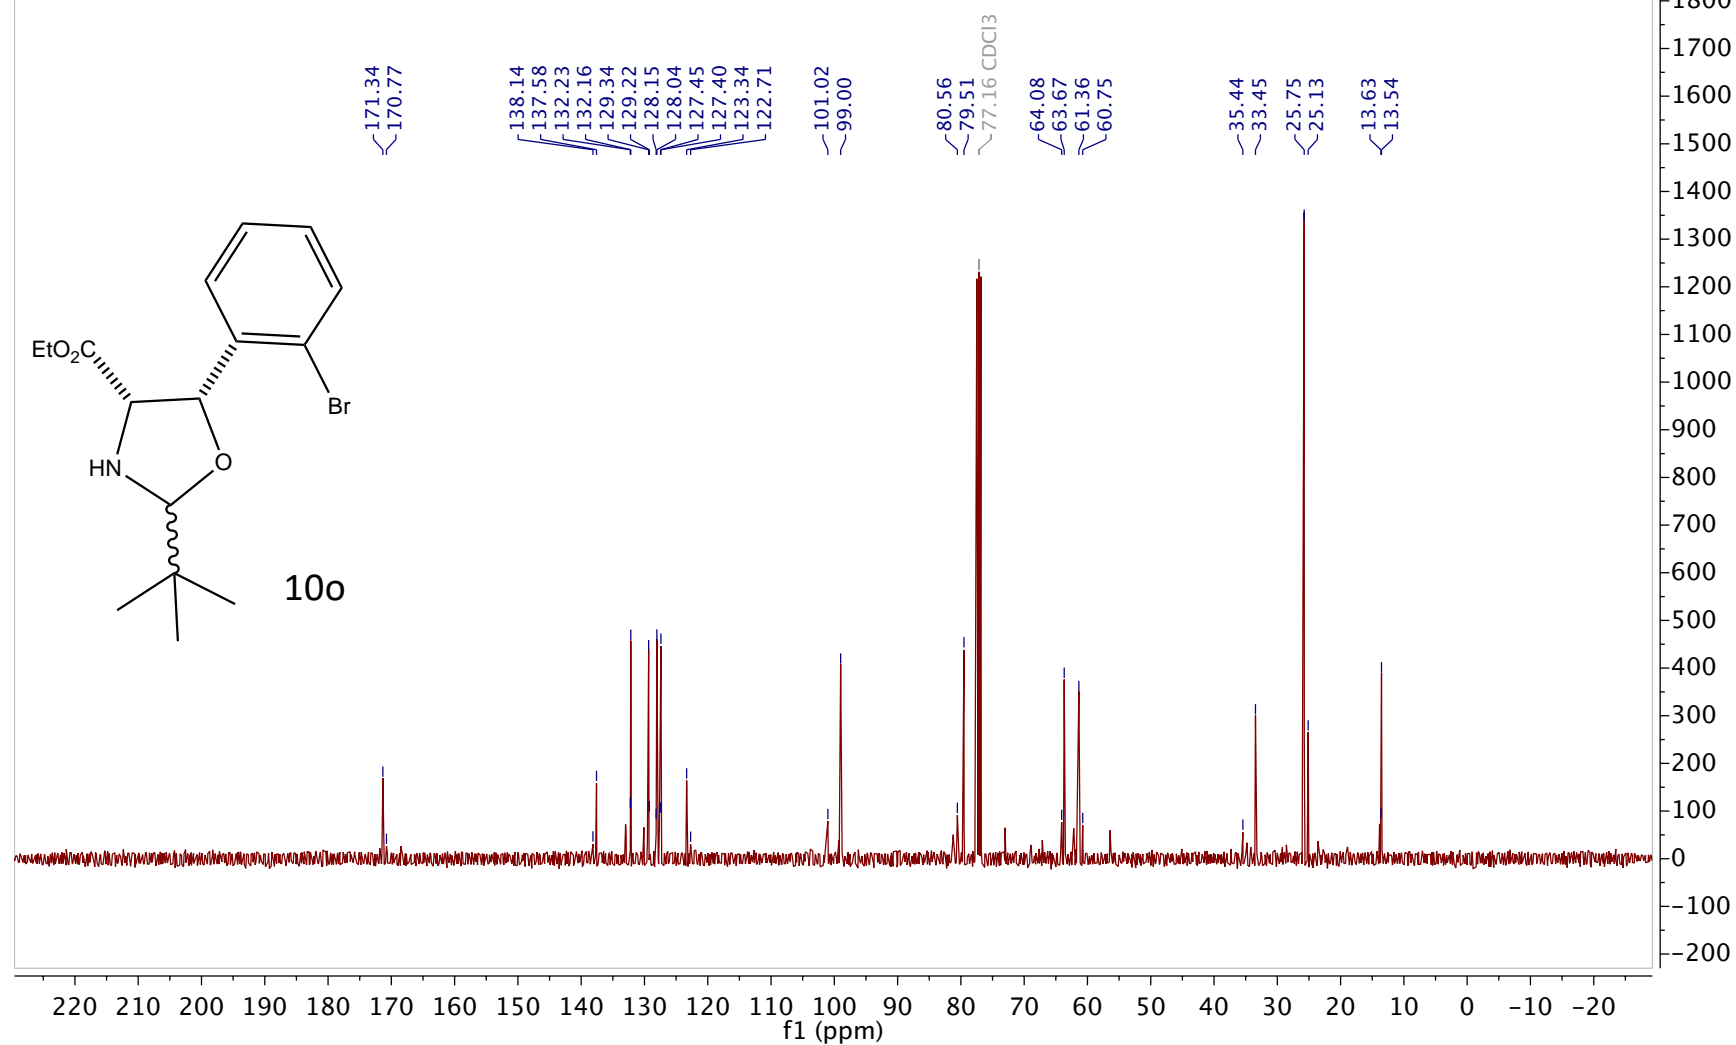

Feb16-2021-56-LS955(C).1.fid  
Instrument AVH400  
Group MGM  
Chemist Liban Saney  
Project Account Code DM7300  
h1acq.crl CDCl3 {C:\NMR} mgmgrp 56

<sup>1</sup>H NMR (400 MHz, CDCl<sub>3</sub>)

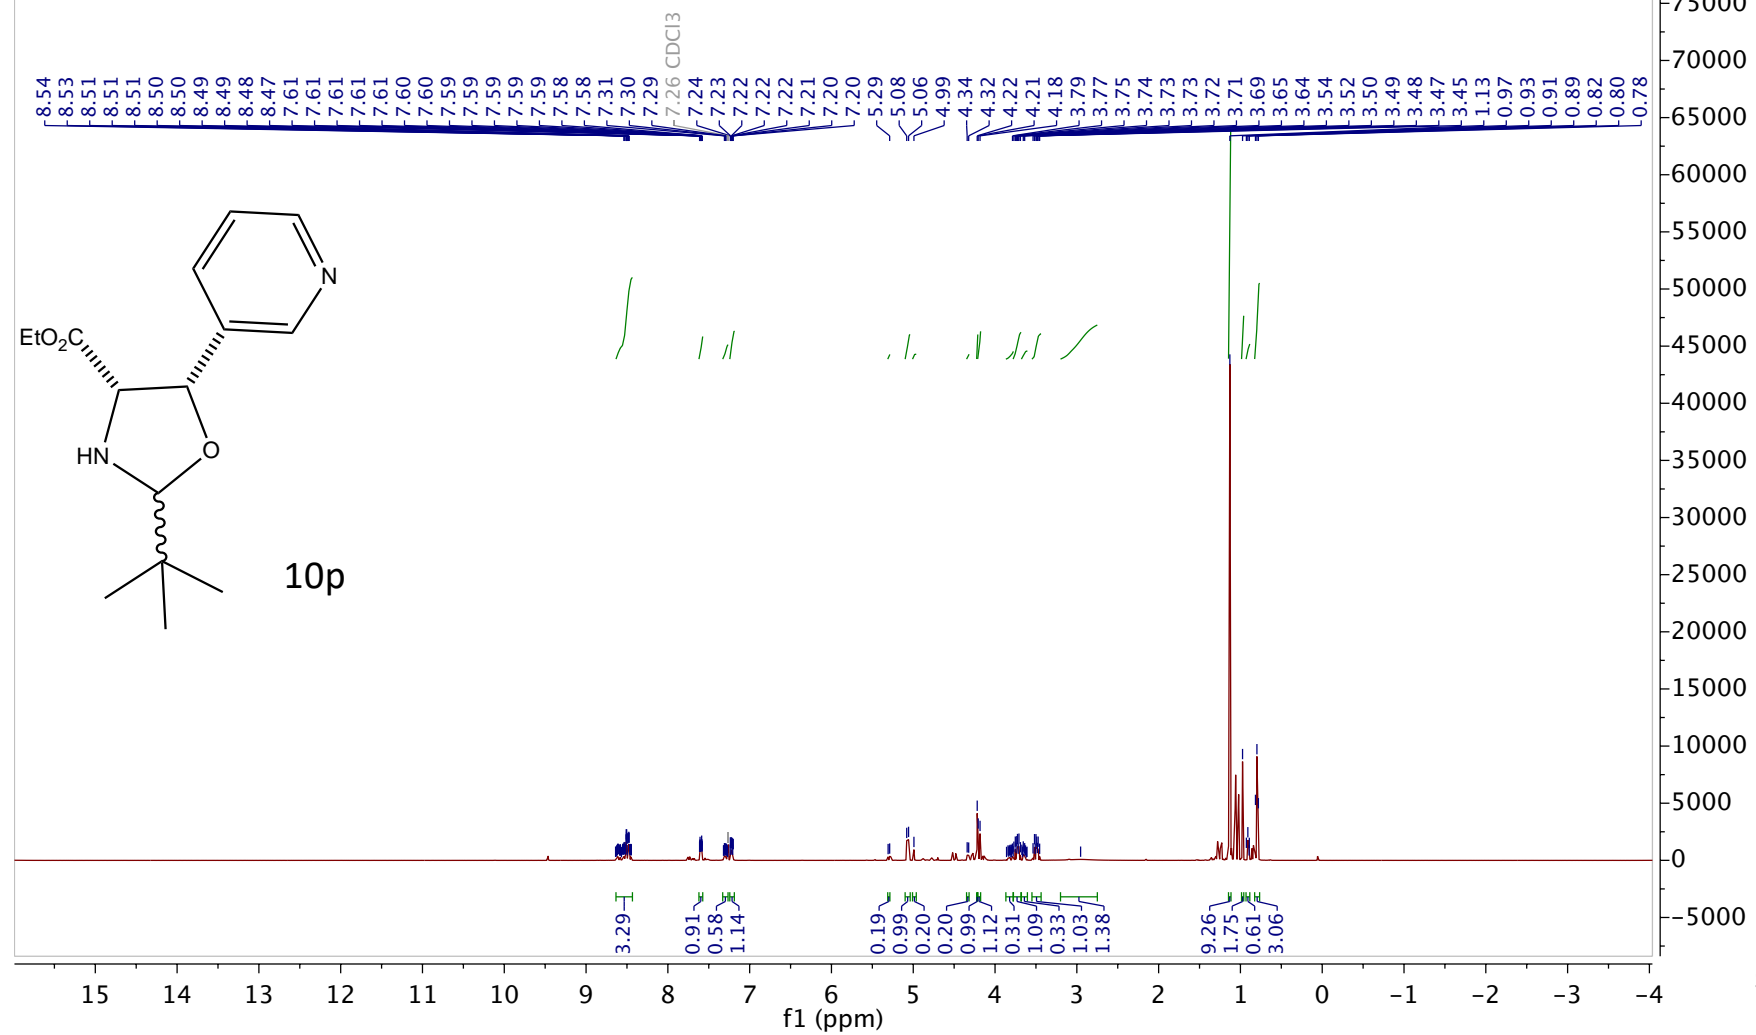

Feb16-2021-56-LS955(C).4.fid  
Instrument AVH400  
Group MGM  
Chemist Liban Saney  
Project Account Code DM7300  
c13acq\_512.crl CDCl3 {C:\NMR} mgmgrp 56

<sup>13</sup>C NMR (101 MHz, CDCl<sub>3</sub>)

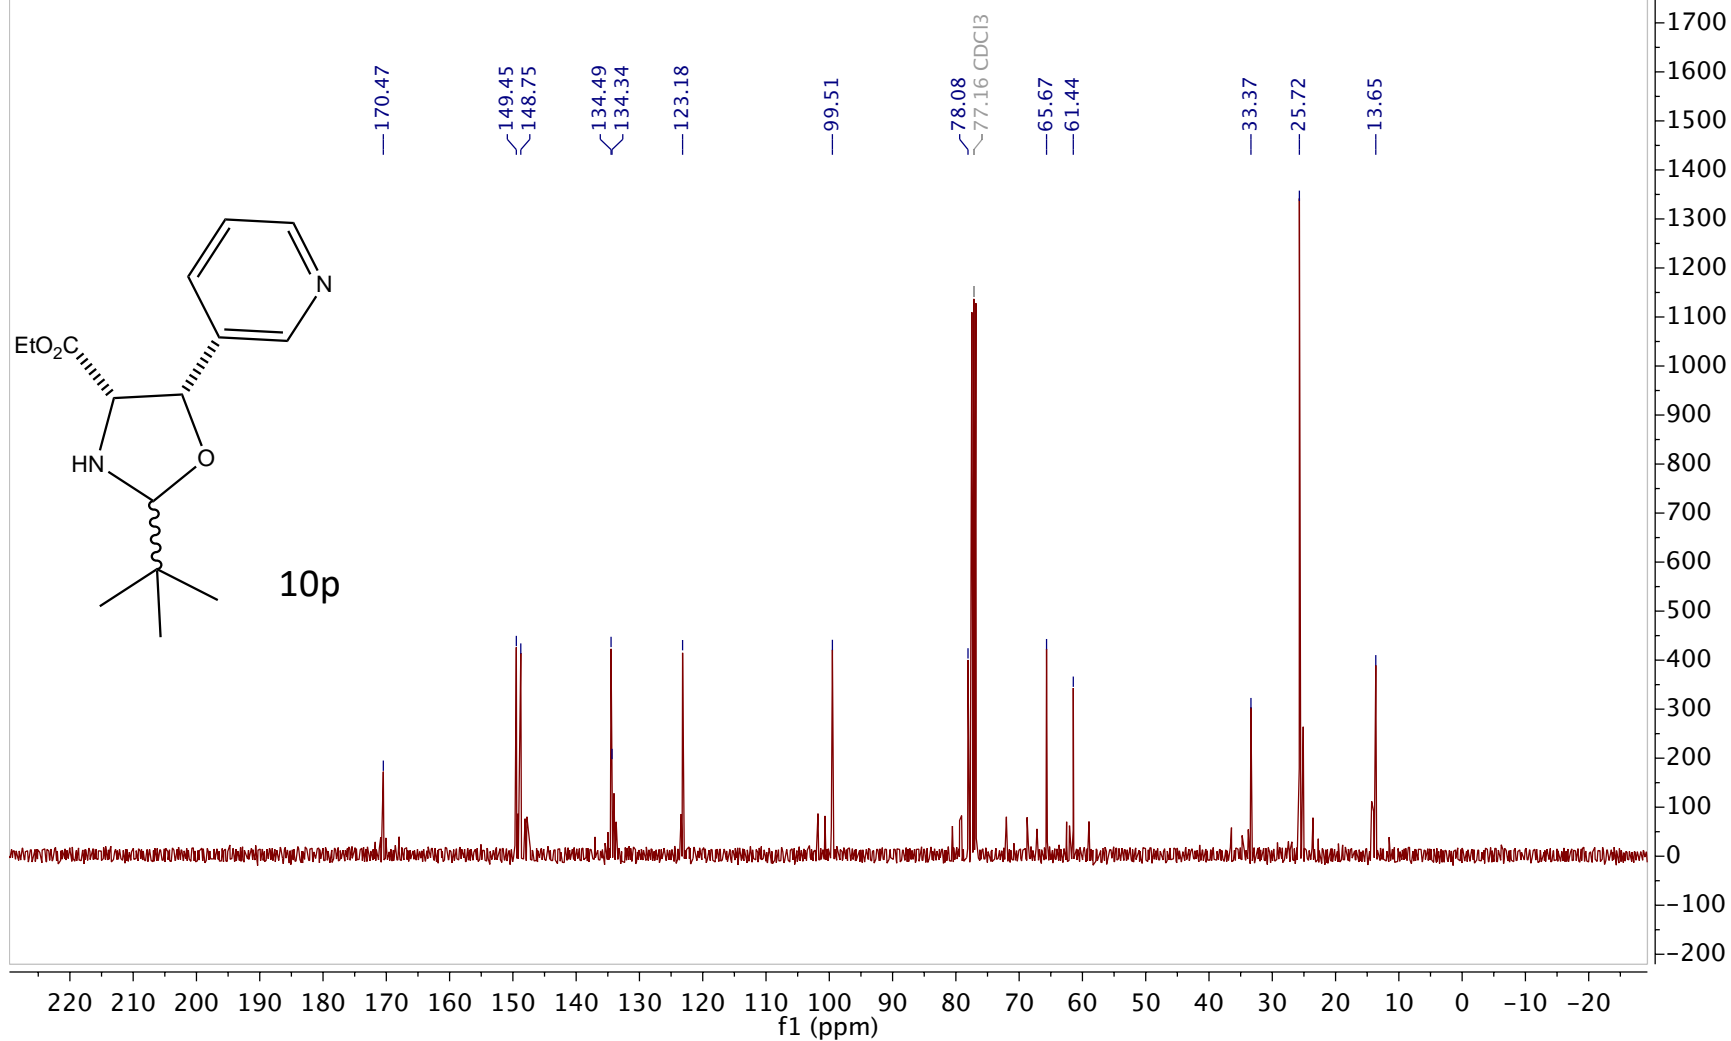

Jun21-2019-60-LS439(P) B6-C8.1.fid  
Instrument AVF400  
Chemist Liban Saney  
Group MGM  
Project Account Code DM7300  
h1acq.crl CDCl3 {C:\NMR} mgmgrp 60

<sup>1</sup>H NMR (400 MHz, CDCl<sub>3</sub>)

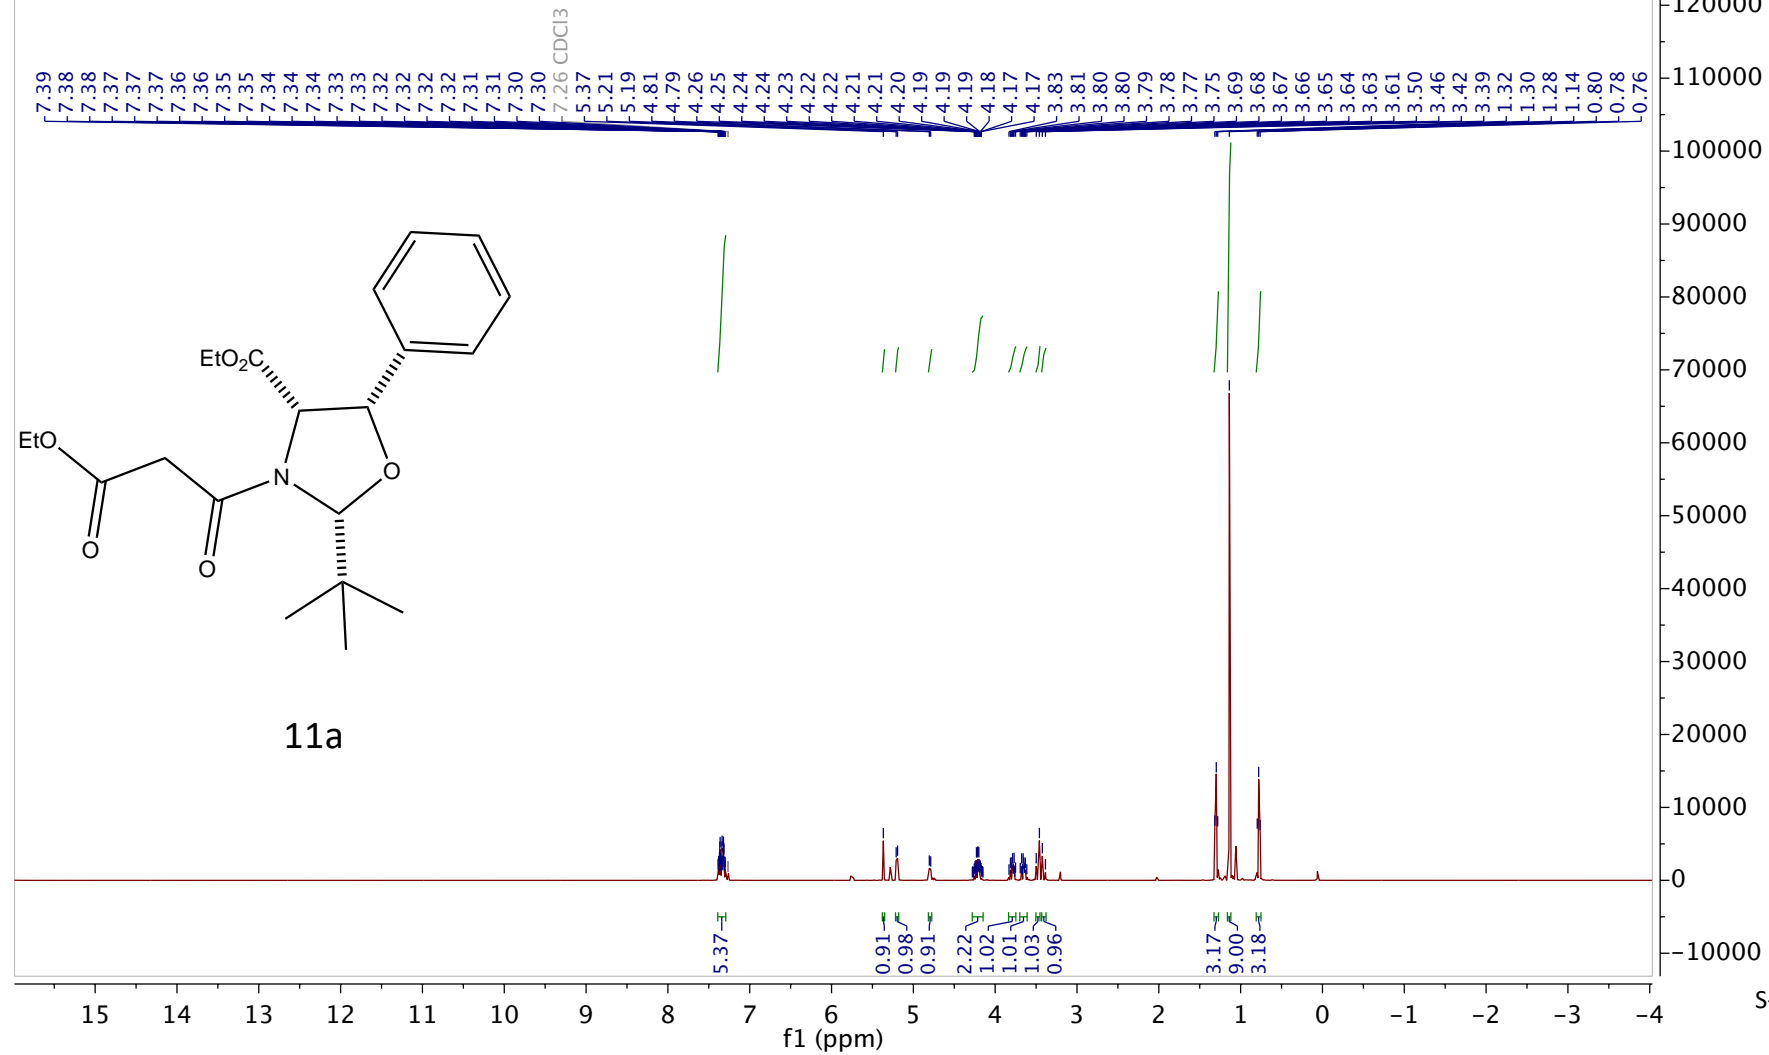

Jun21-2019-60-LS439(P) B6-C8.4.fid  
Instrument AVF400  
Chemist Liban Saney  
Group MGM  
Project Account Code DM7300  
c13acq\_512.crl CDCl3 {C:\NMR} mgmgrp 60

<sup>13</sup>C NMR (101 MHz, CDCl<sub>3</sub>)

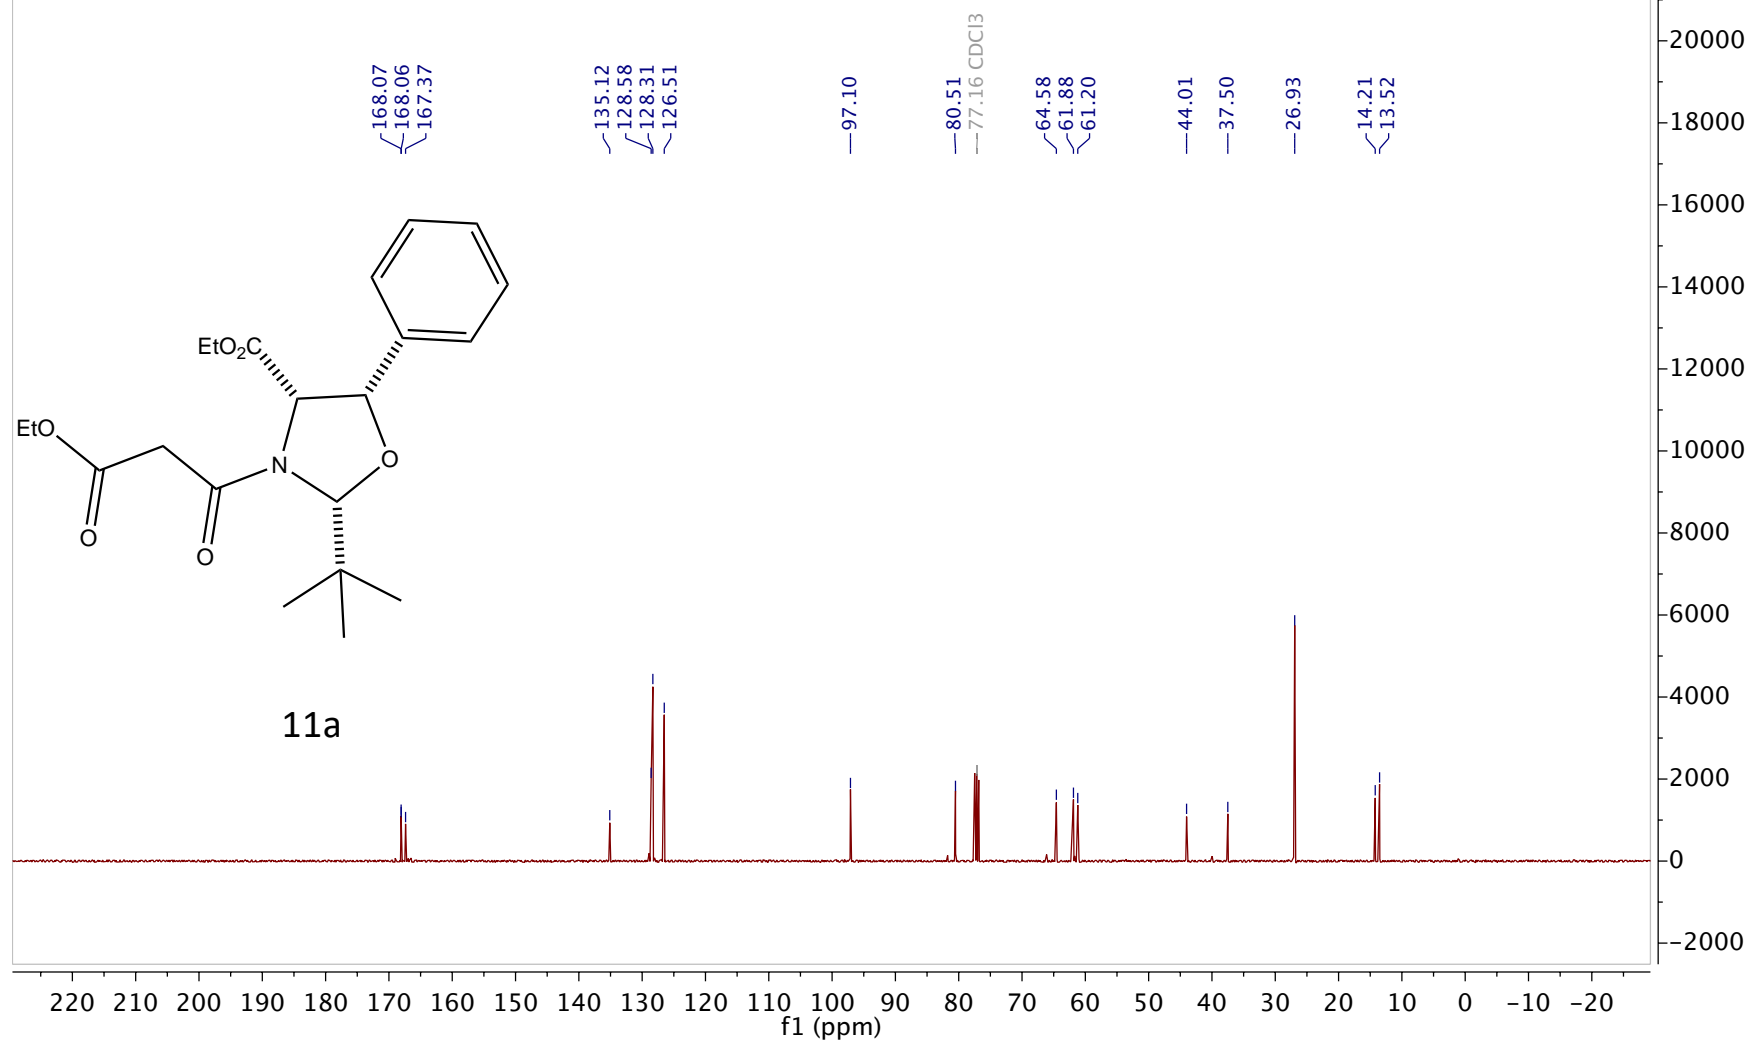



Aug26-2019-60-LS505(C).1.fid  
Instrument AVF400  
Chemist Liban Saney  
Group MGM  
Project Account Code DM7300  
h1acq.crl CDCl3 {C:\NMR} mgmgrp 60

<sup>1</sup>H NMR (400 MHz, CDCl<sub>3</sub>)

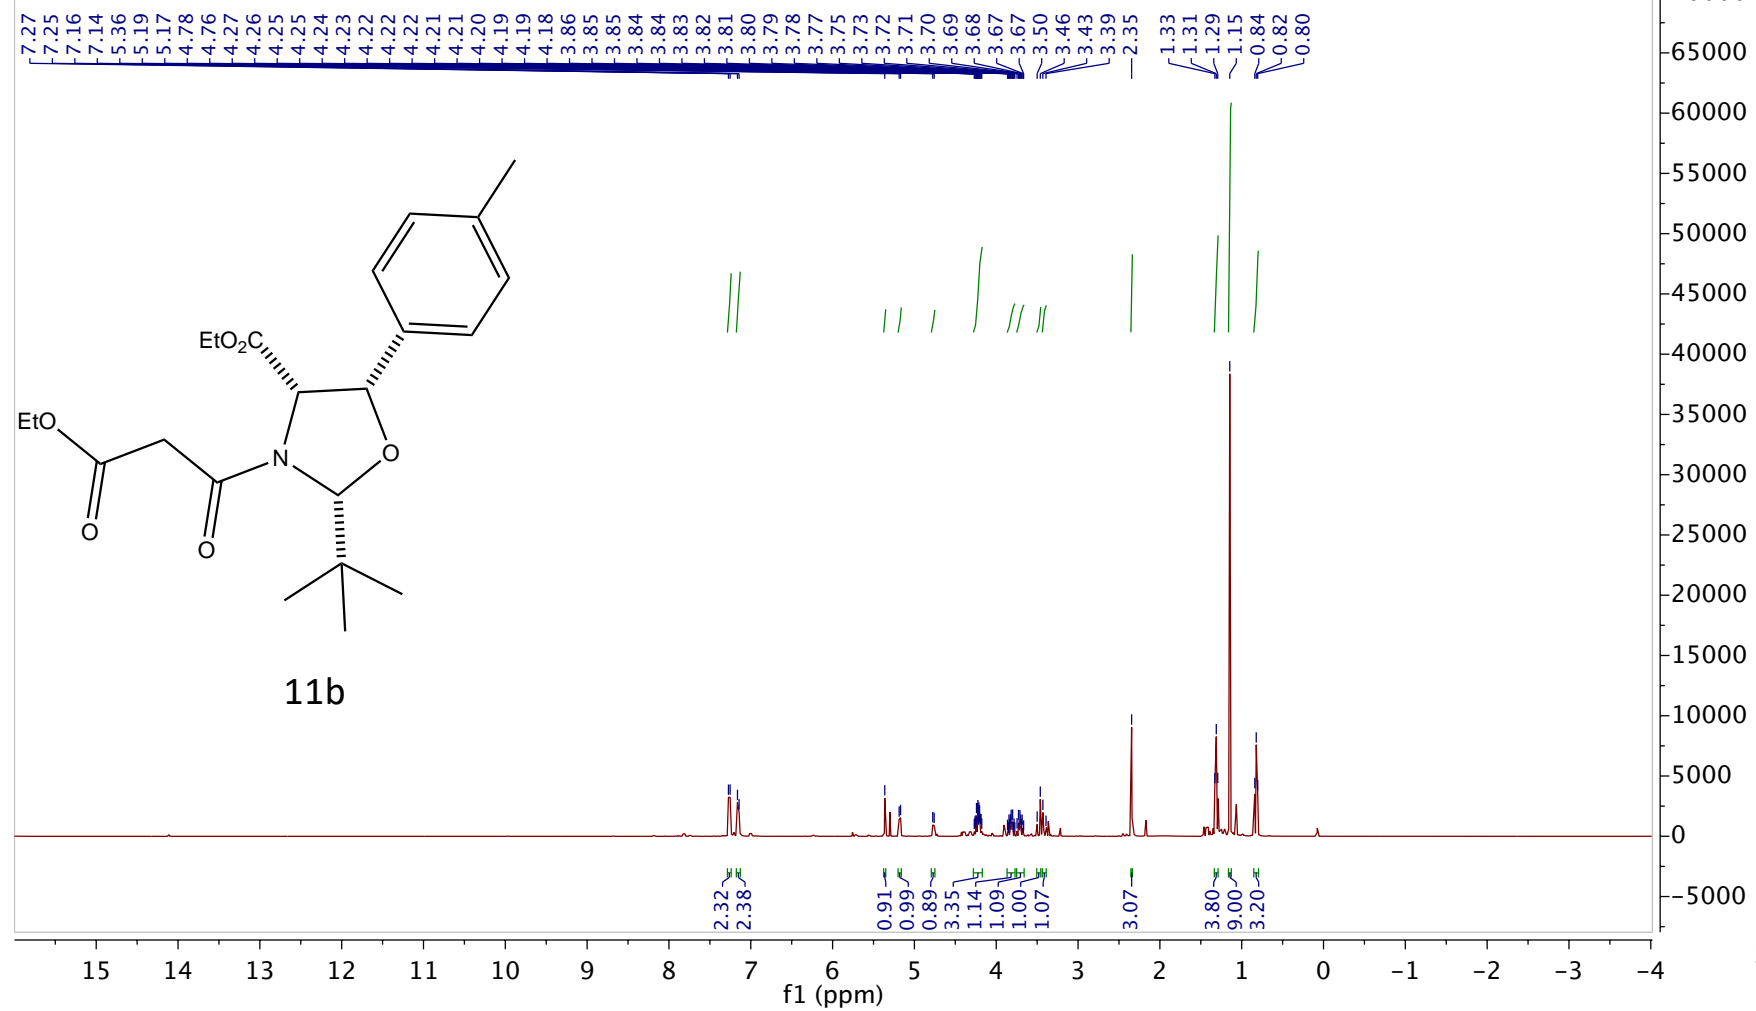

Aug26-2019-60-LS505(C).4.fid  
Instrument AVF400  
Chemist Liban Saney  
Group MGM  
Project Account Code DM7300  
c13acq\_512.crl CDCl3 {C:\NMR} mgmgrp 60

<sup>13</sup>C NMR (101 MHz, CDCl<sub>3</sub>)

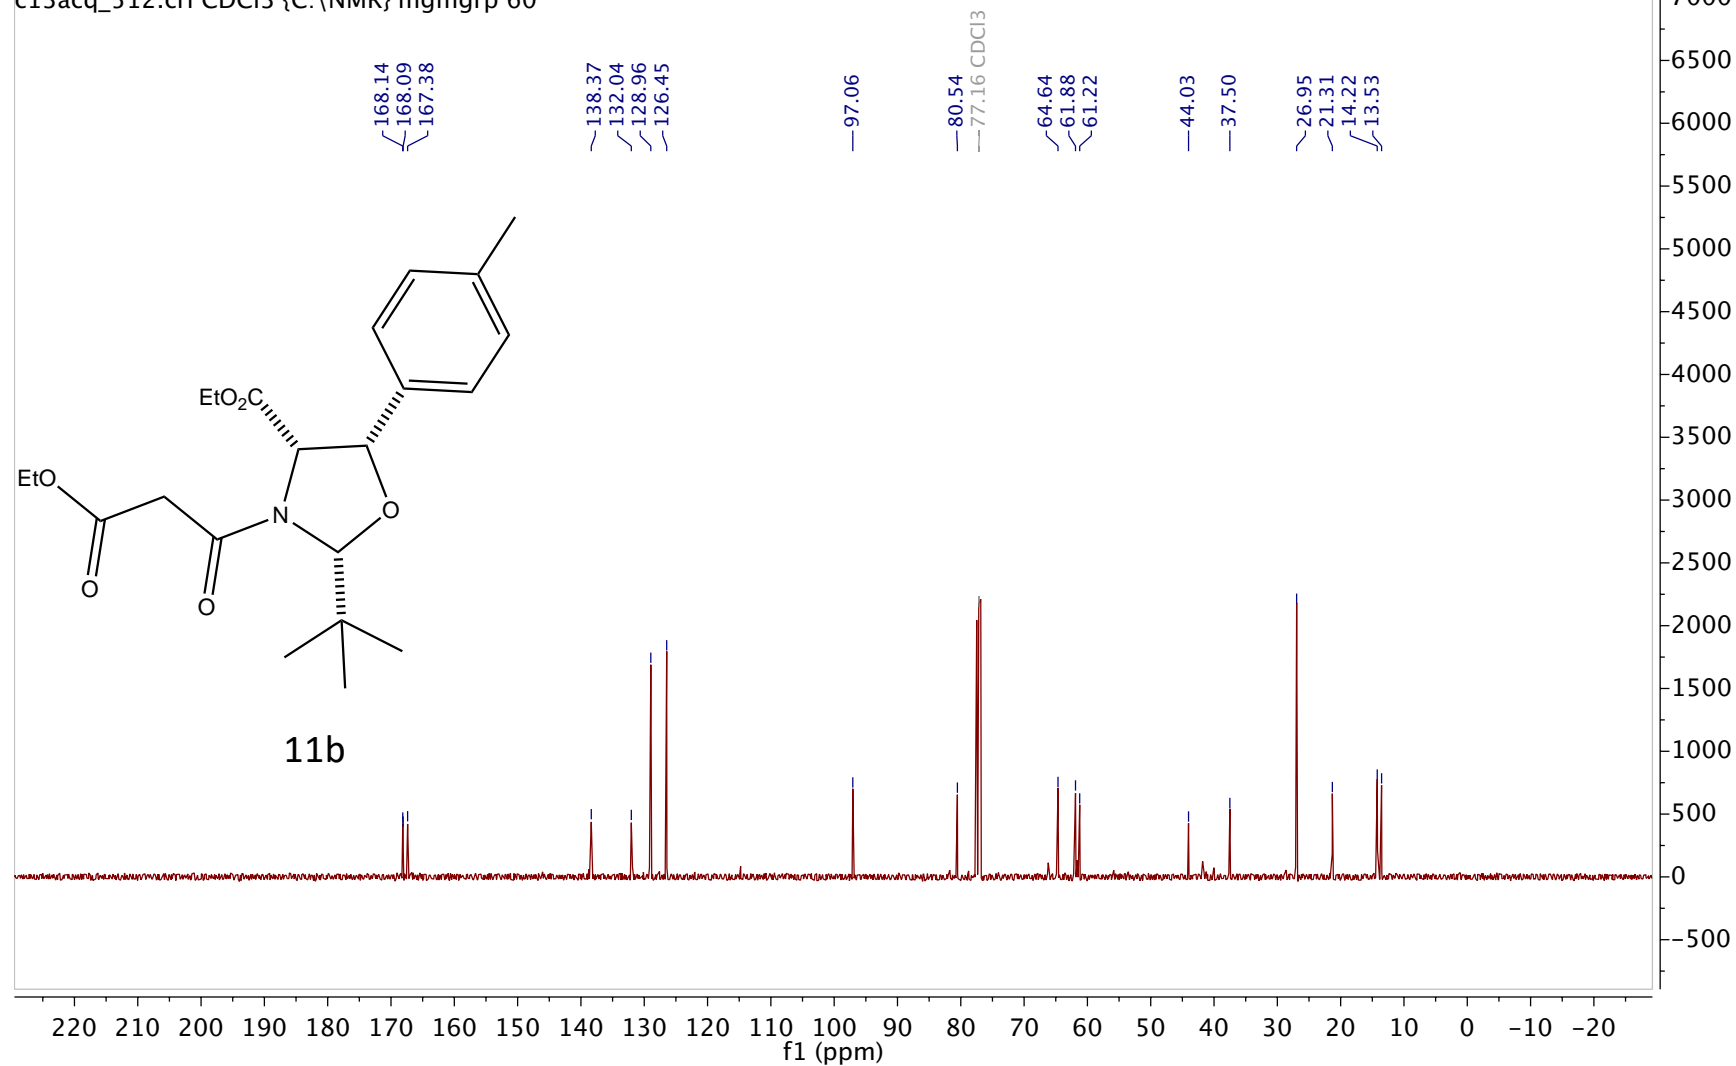

Sep05-2019-59-LS522(P) A7-B1.1.fid  
Instrument AVF400  
Chemist Liban Saney  
Group MGM  
Project Account Code DM7300  
h1acq.crl CDCl3 {C:\NMR} mgmgrp 59

<sup>1</sup>H NMR (400 MHz, CDCl<sub>3</sub>)

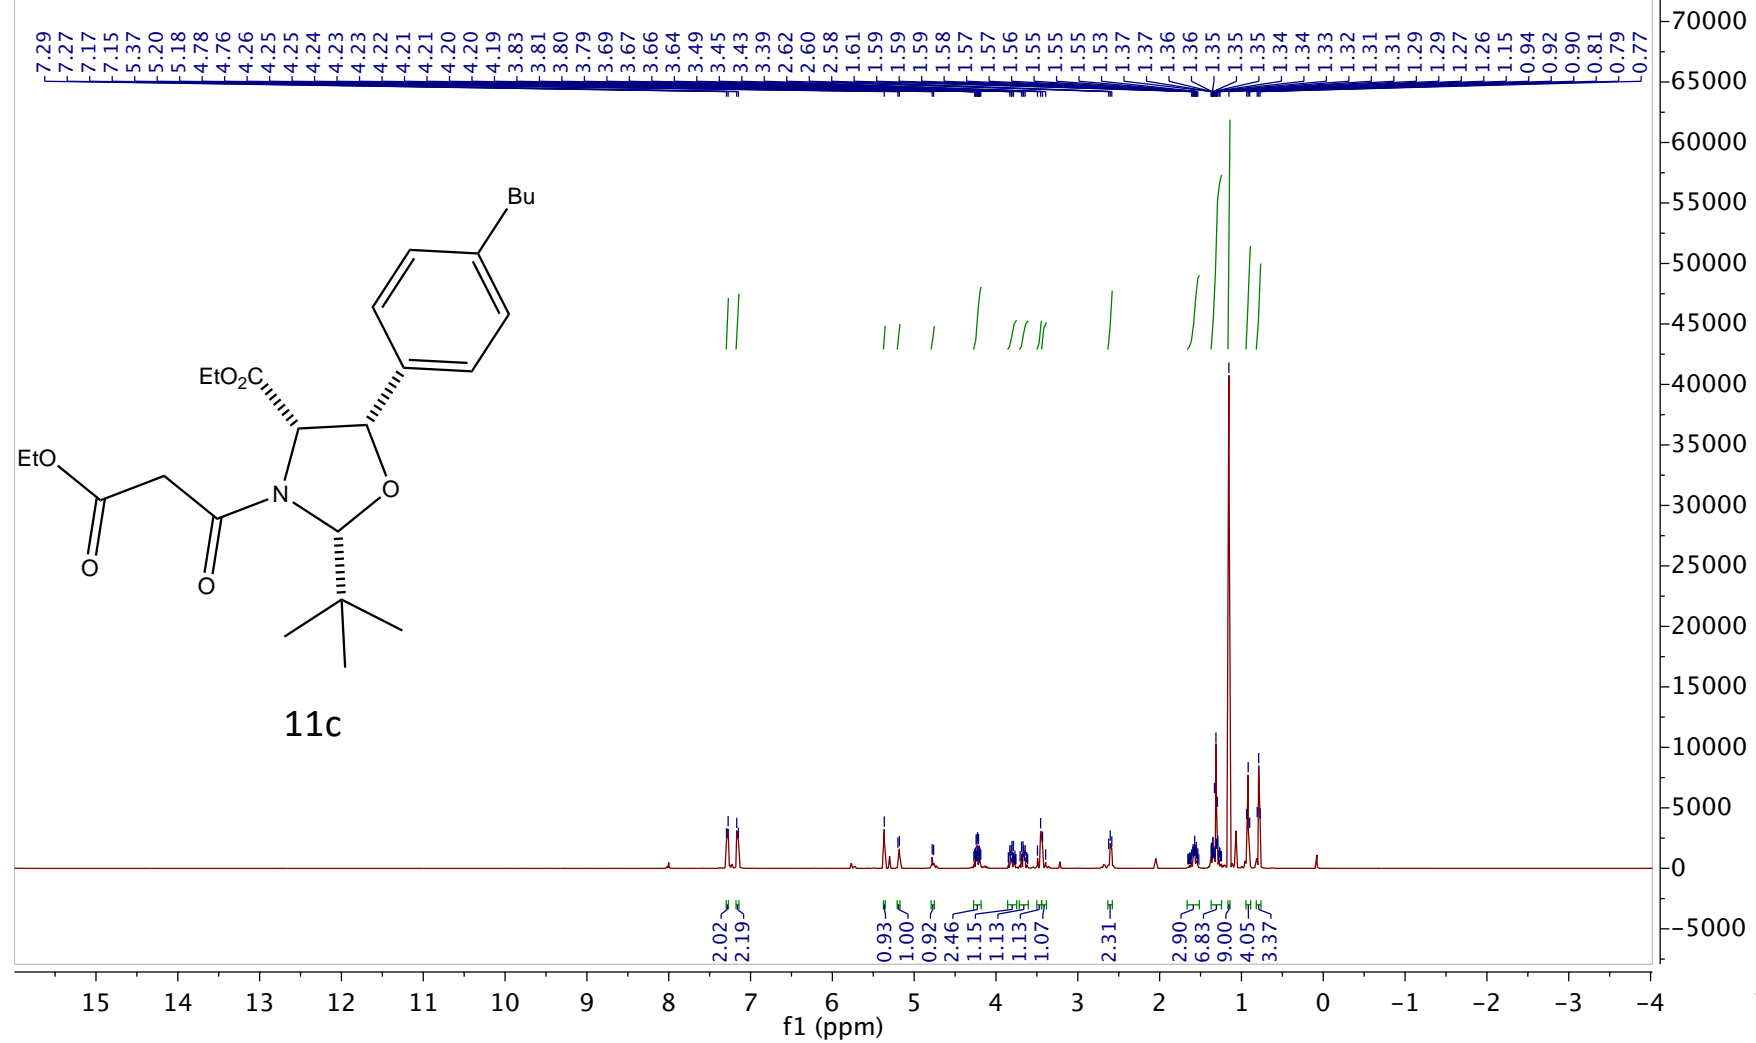

Sep05-2019-59-LS522(P) A7-B1.4.fid  
Instrument AVF400  
Chemist Liban Saney  
Group MGM  
Project Account Code DM7300  
c13acq\_512.crl CDCl3 {C:\NMR} mgmgrp 59

<sup>13</sup>C NMR (101 MHz, CDCl<sub>3</sub>)

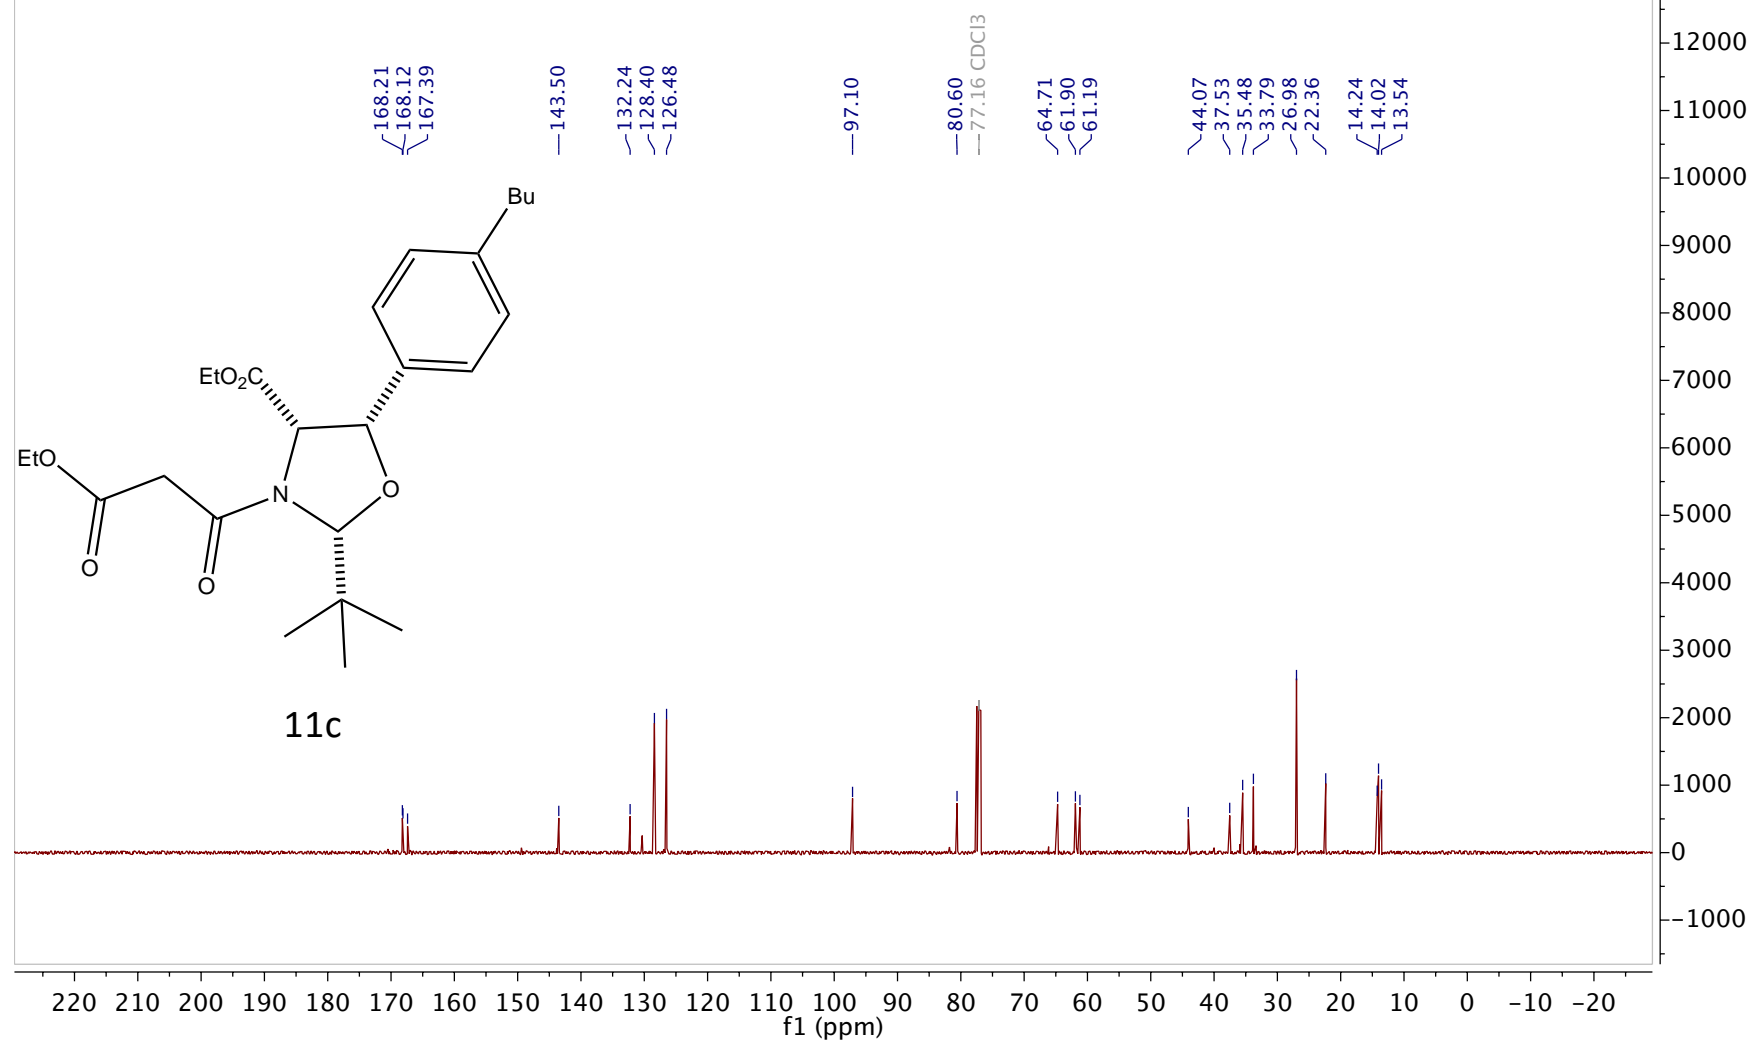

Sep01-2019-60-LS517(C).1.fid  
Instrument AVF400  
Chemist Liban Saney  
Group MGM  
Project Account Code DM7300  
h1acq.crl CDCl3 {C:\NMR} mgmgrp 60

<sup>1</sup>H NMR (400 MHz, CDCl<sub>3</sub>)

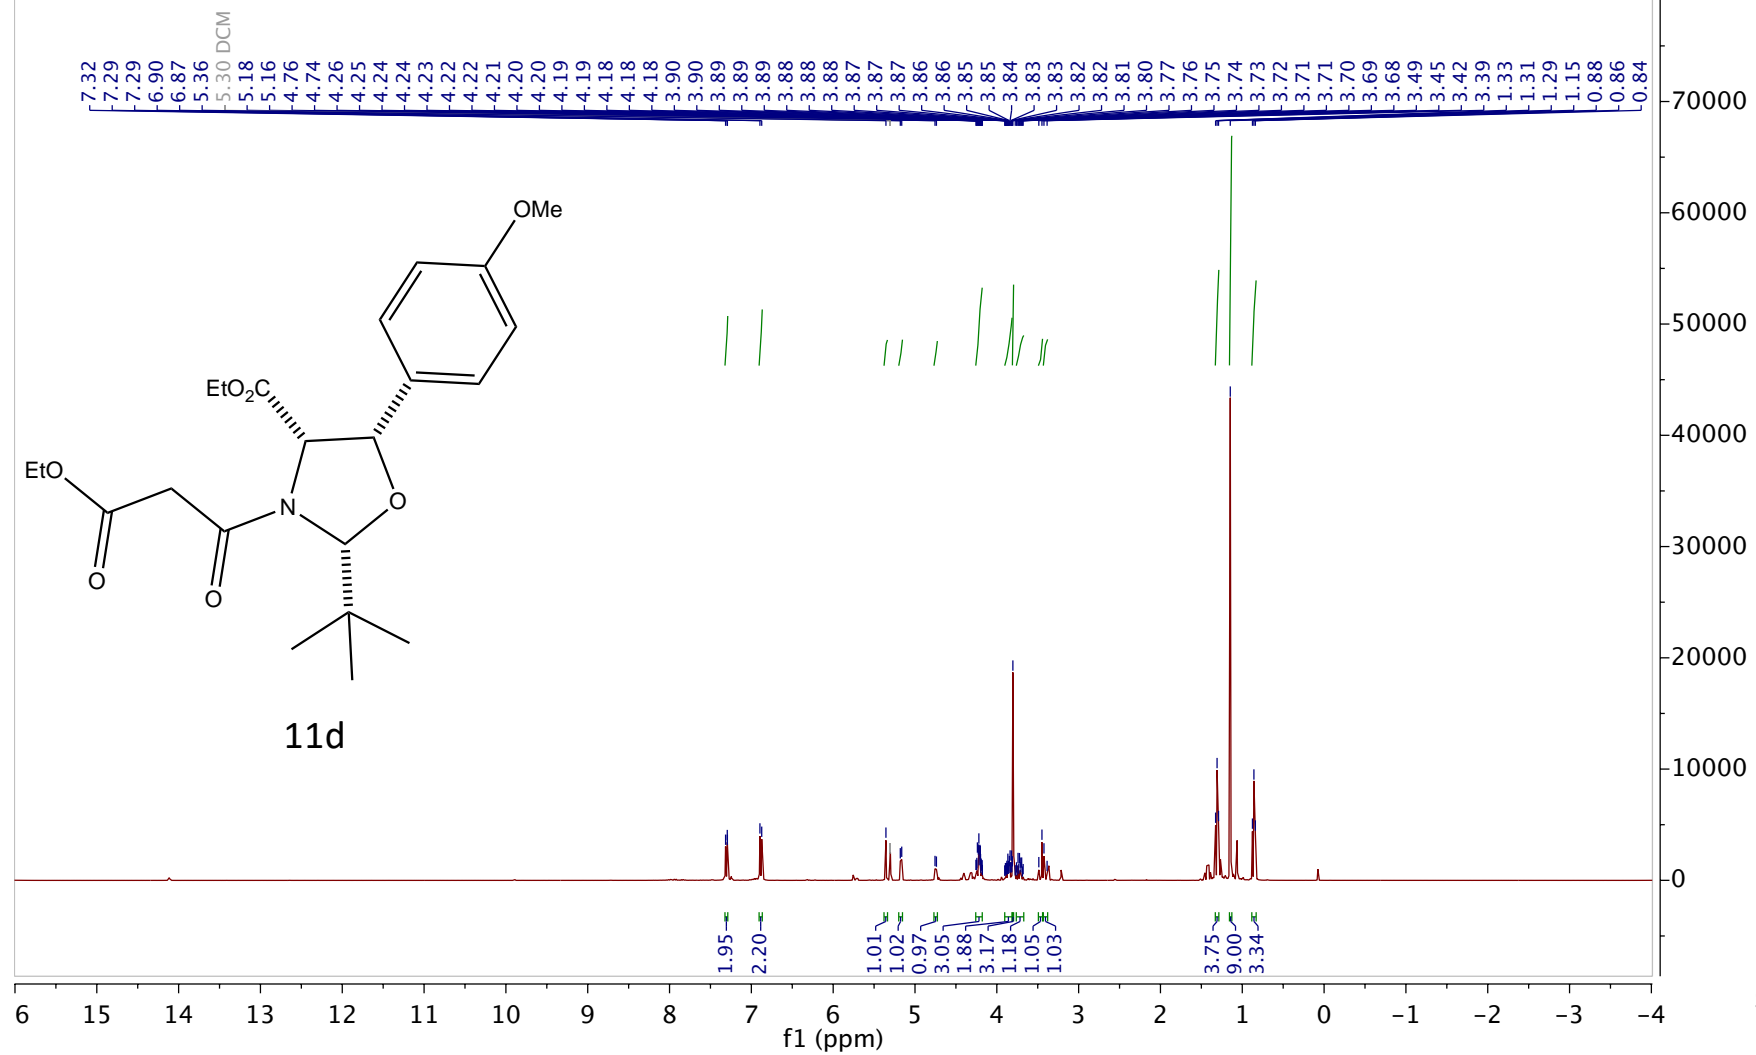

Sep01-2019-60-LS517(C).4.fid  
Instrument AVF400  
Chemist Liban Saney  
Group MGM  
Project Account Code DM7300  
c13acq\_512.crl CDCl3 {C:\NMR} mgmgrp 60

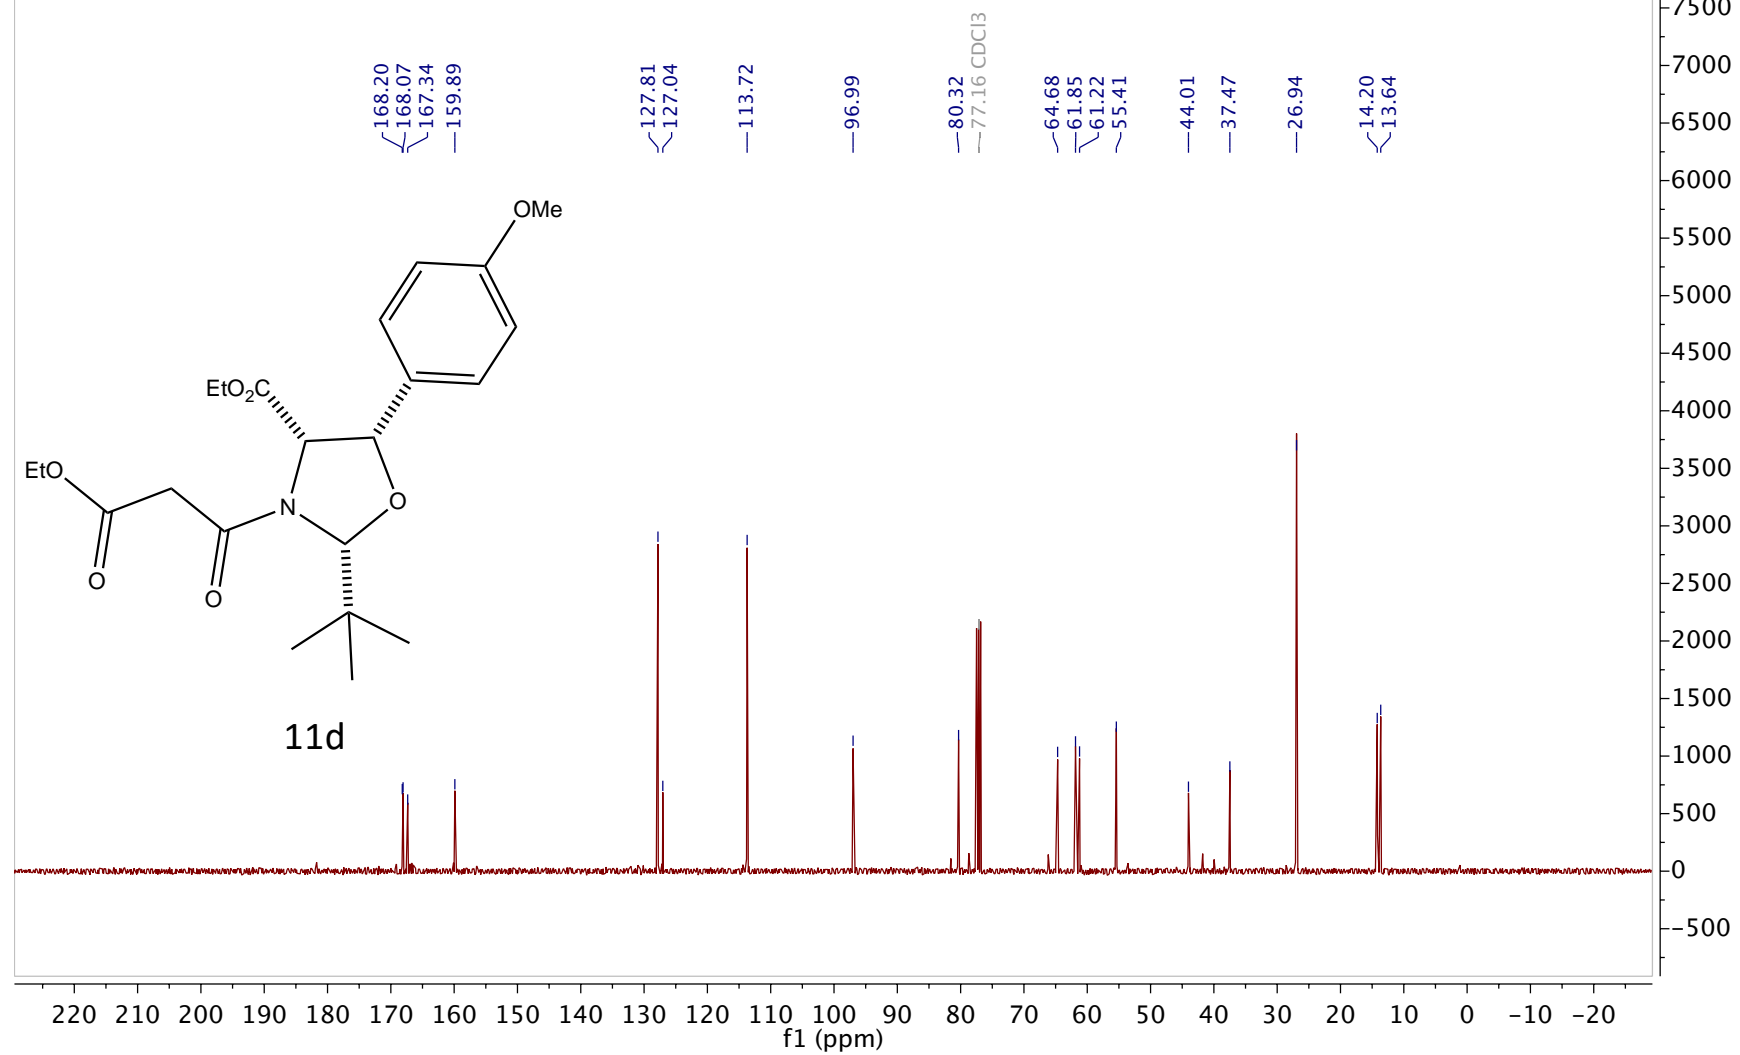

Sep22-2019-60-LS539(P) B8-C3.1.fid  
Instrument AVF400  
Chemist Liban Saney  
Group MGM  
Project Account Code DM7300  
h1acq.crl CDCl3 {C:\NMR} mgmgrp 60

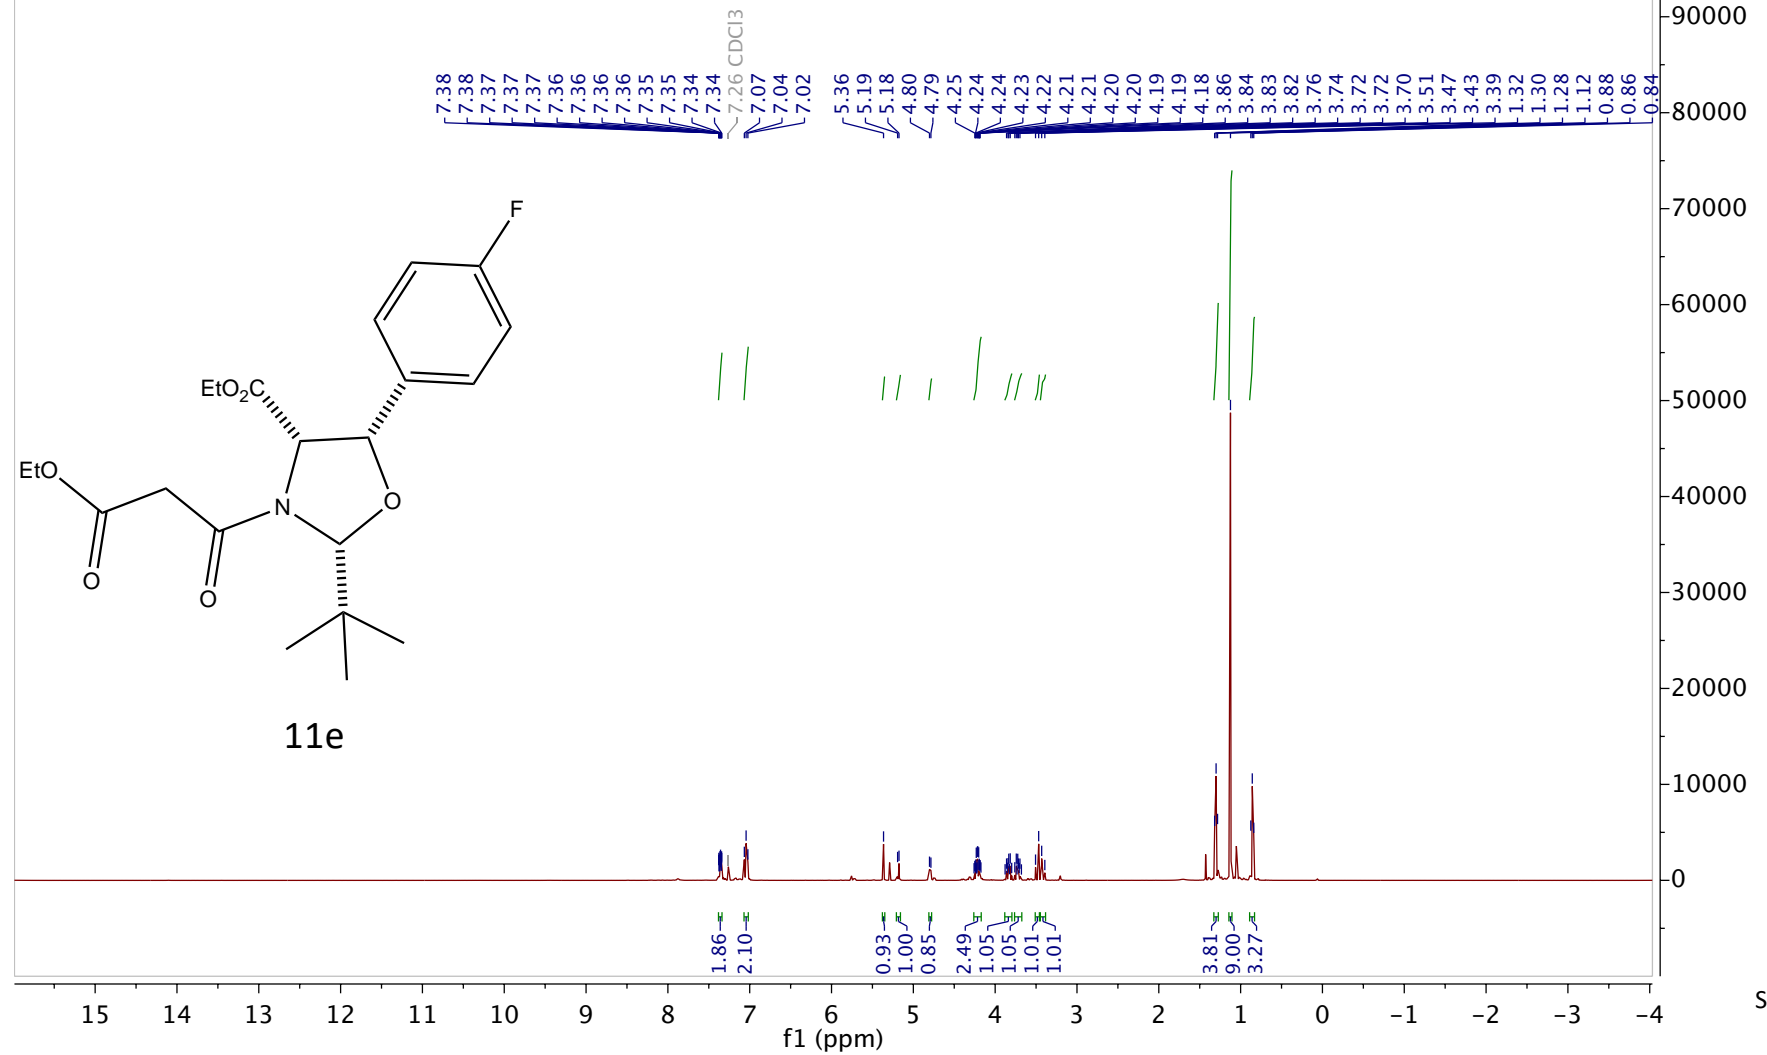

Sep22-2019-60-LS539(P) B8-C3.4.fid  
Instrument AVF400  
Chemist Liban Saney  
Group MGM  
Project Account Code DM7300  
c13acq\_512.crl CDCl3 {C:\NMR} mgmgrp 60

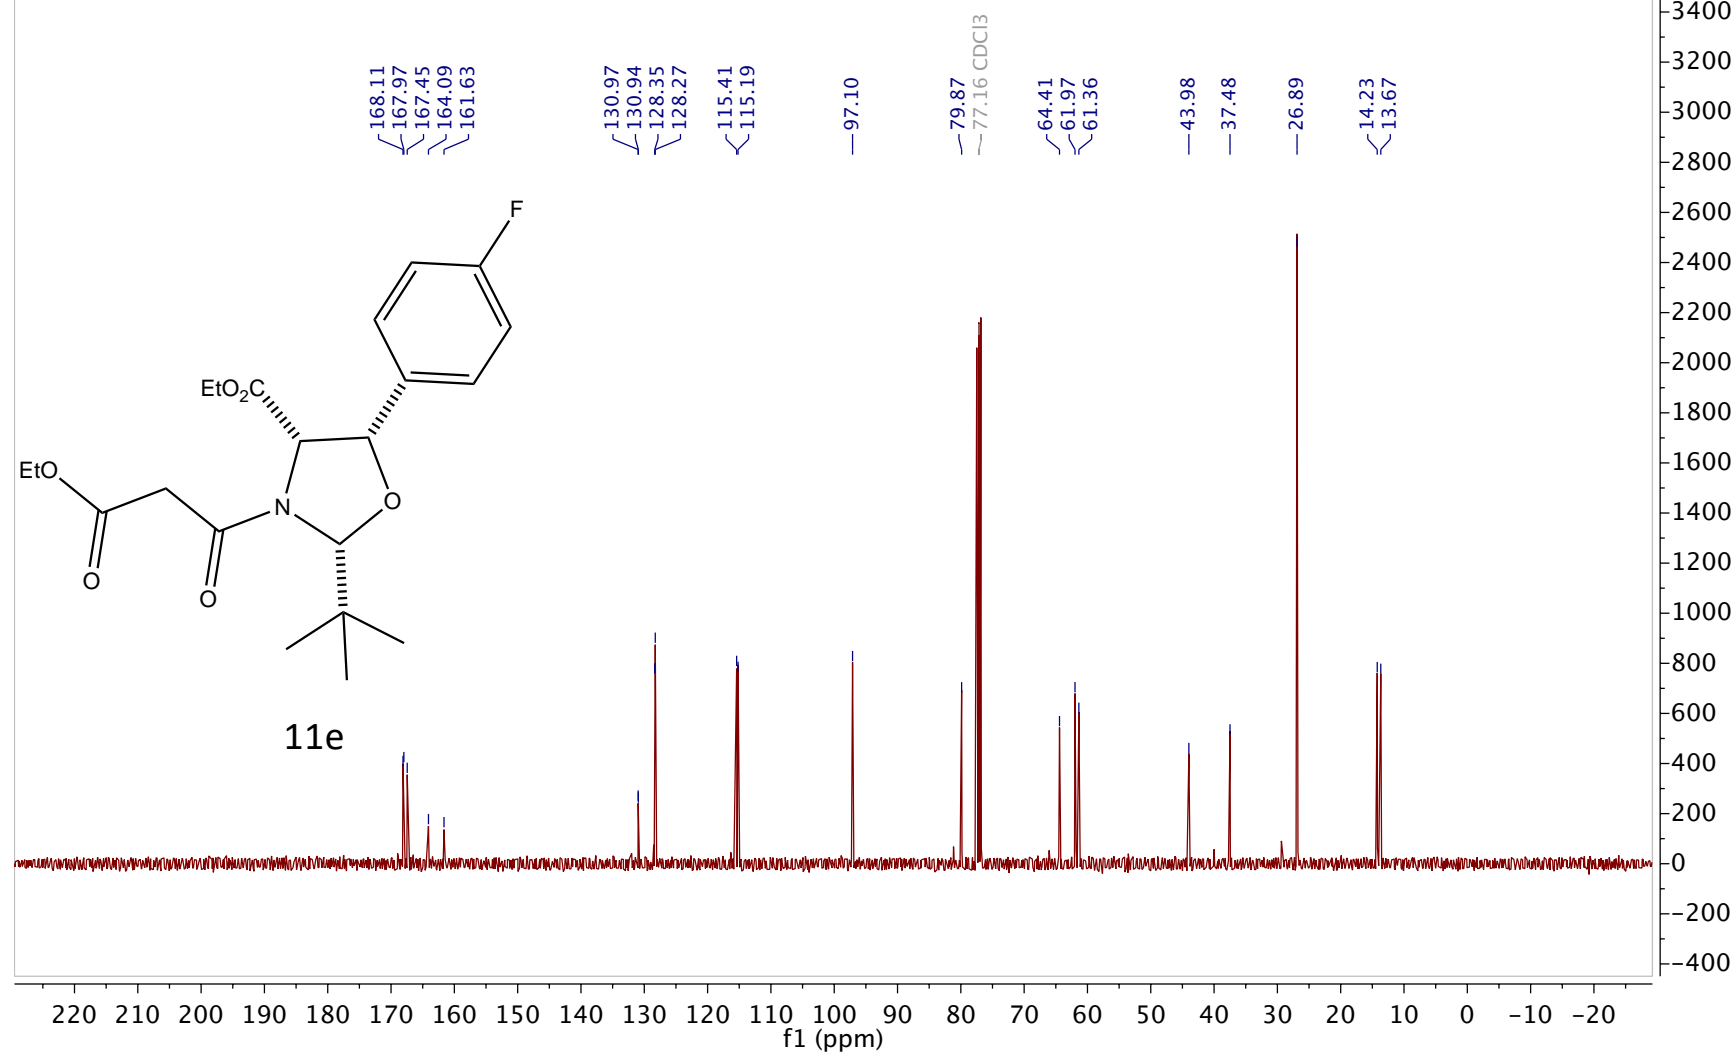



Sep22-2019-60-LS539(P) B8-C3.8.fid  
Instrument AVF400  
Chemist Liban Saney  
Group MGM  
Project Account Code DM7300  
f19dec\_256.crl CDCl3 {C:\NMR} mgmgrp 60

$^{19}\text{F}$  NMR (377 MHz,  $\text{CDCl}_3$ )

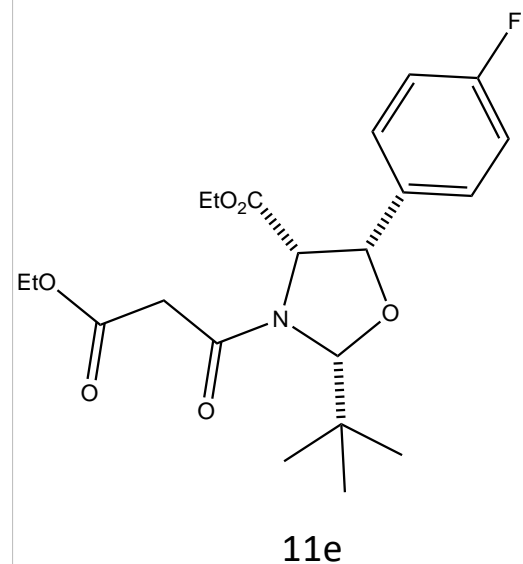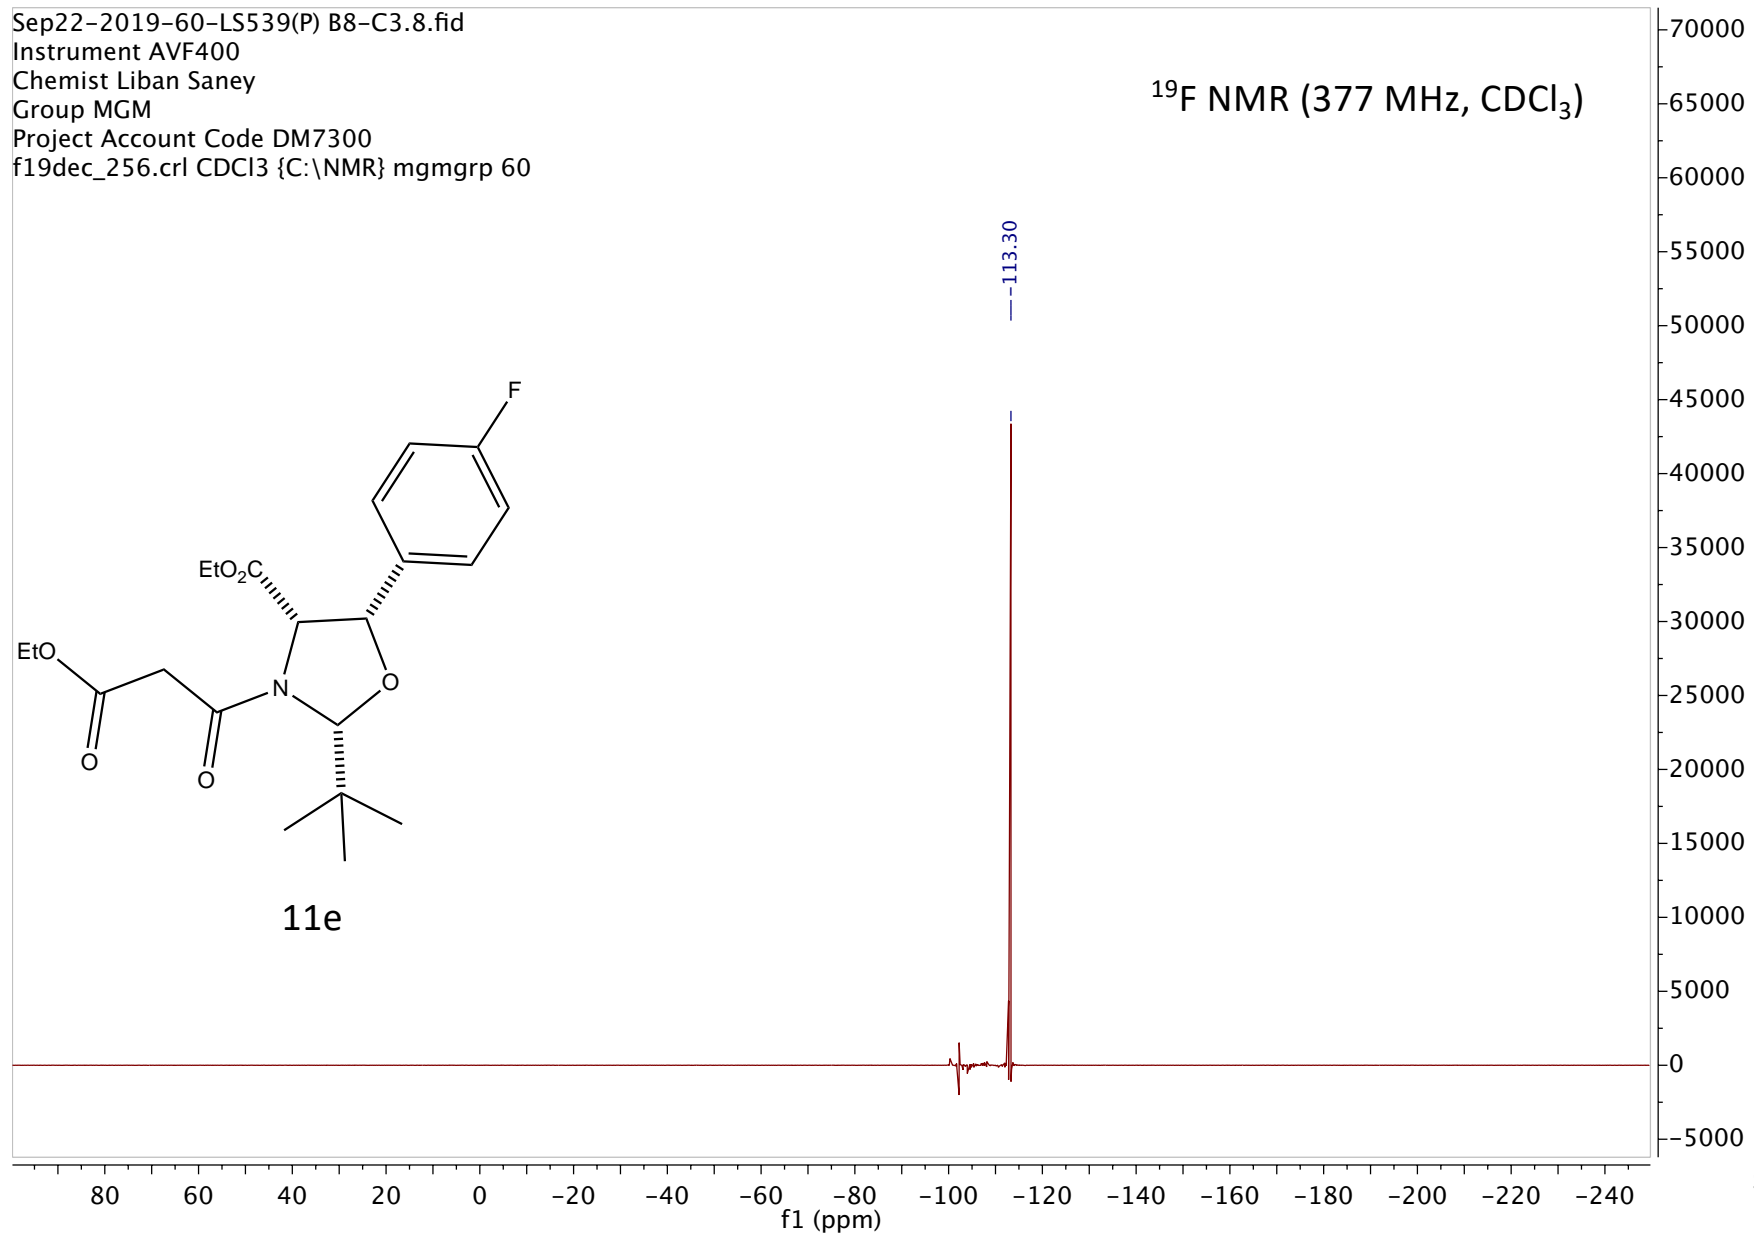

Sep21-2019-60-LS537(P) B5-C6.1.fid  
Instrument AVF400  
Chemist Liban Saney  
Group MGM  
Project Account Code DM7300  
h1acq.crl CDCl3 {C:\NMR} mgmgrp 60

<sup>1</sup>H NMR (400 MHz, CDCl<sub>3</sub>)

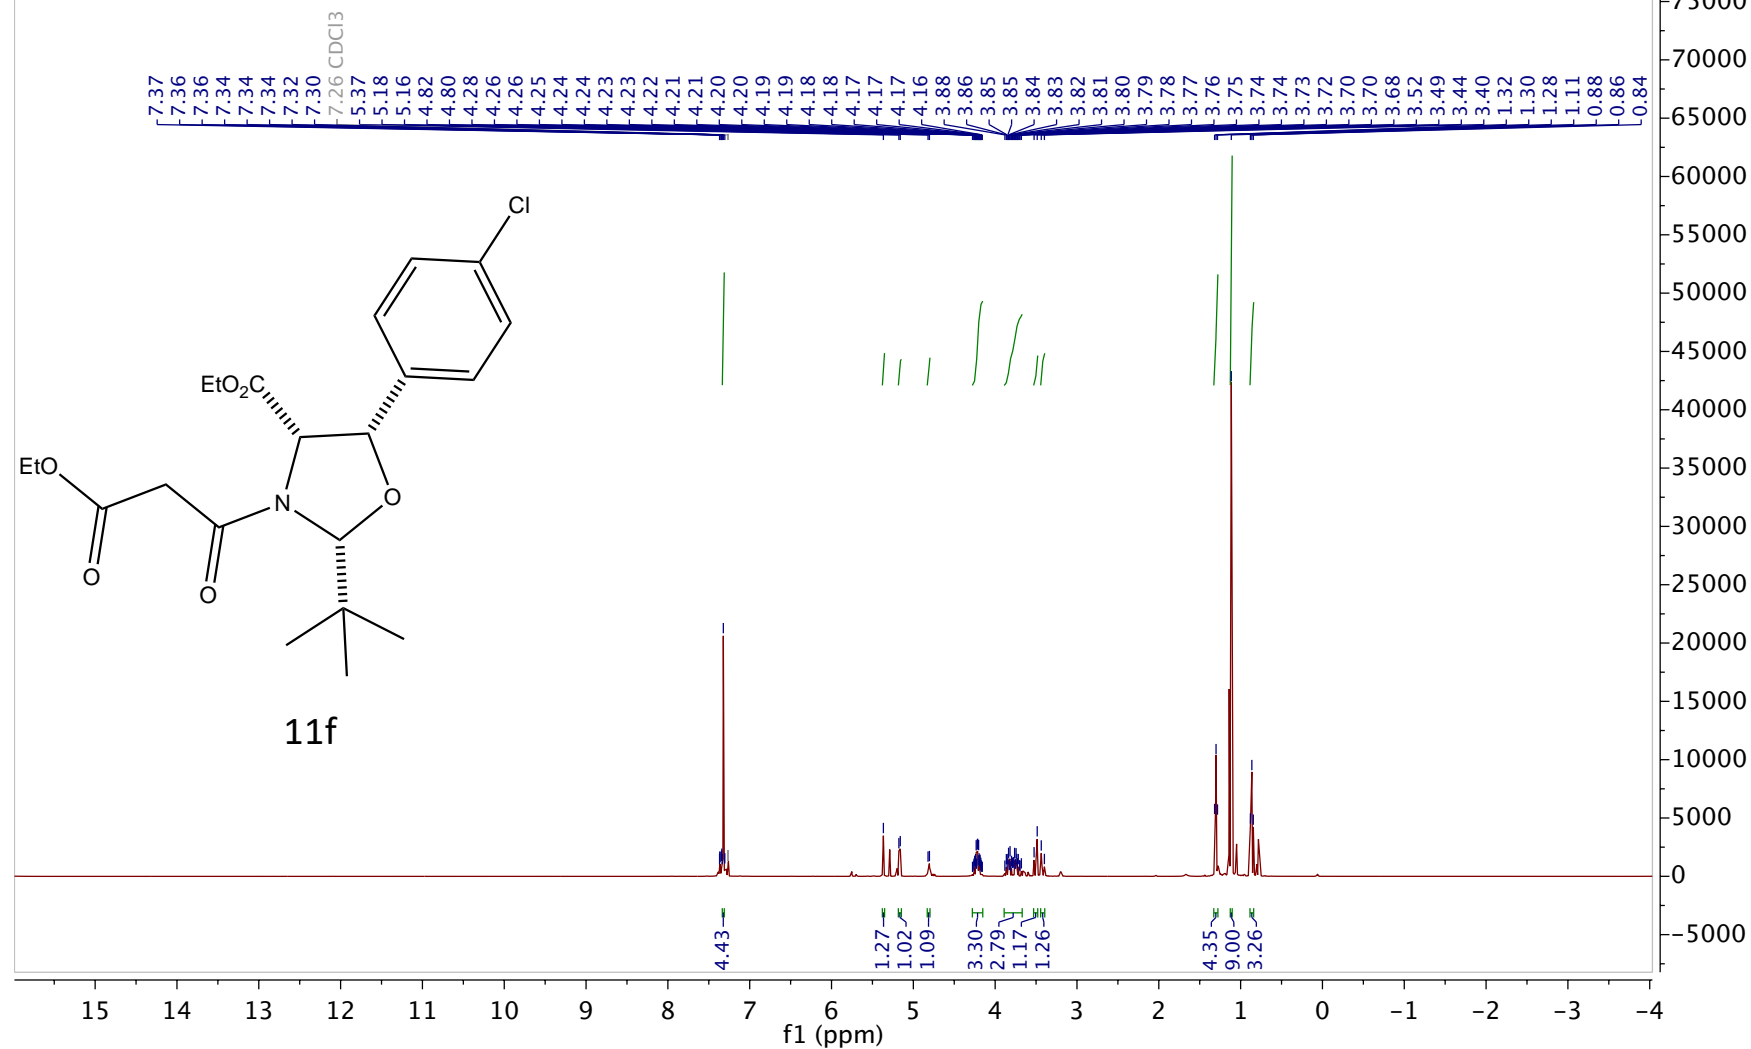

Sep21-2019-60-LS537(P) B5-C6.4.fid  
Instrument AVF400  
Chemist Liban Saney  
Group MGM  
Project Account Code DM7300  
c13acq\_512.crl CDCl3 {C:\NMR} mgmgrp 60

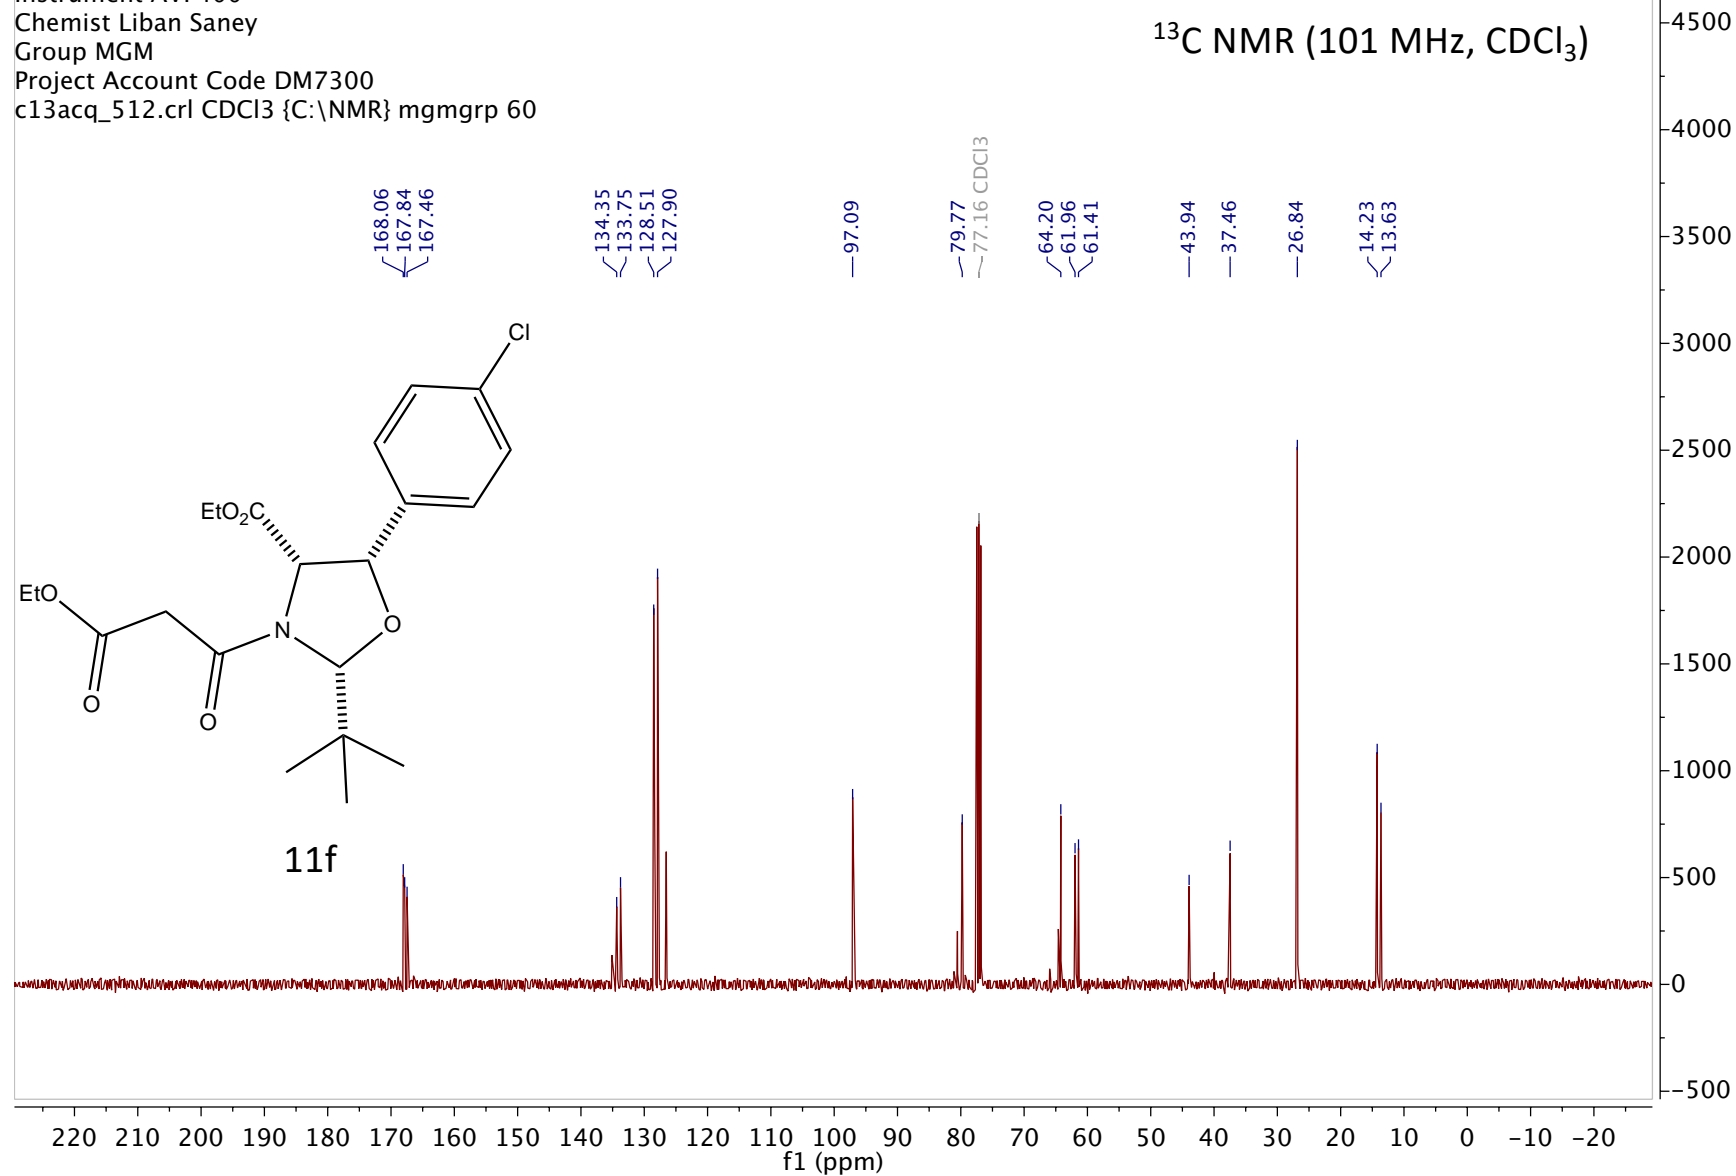

Jan31-2021-7-LS934(P) B12-C9.1.fid  
Instrument AVH400  
Group MGM  
Chemist Liban Saney  
Project Account Code DM7300  
h1acq.crl CDCl3 {C:\NMR} mgmgrp 7

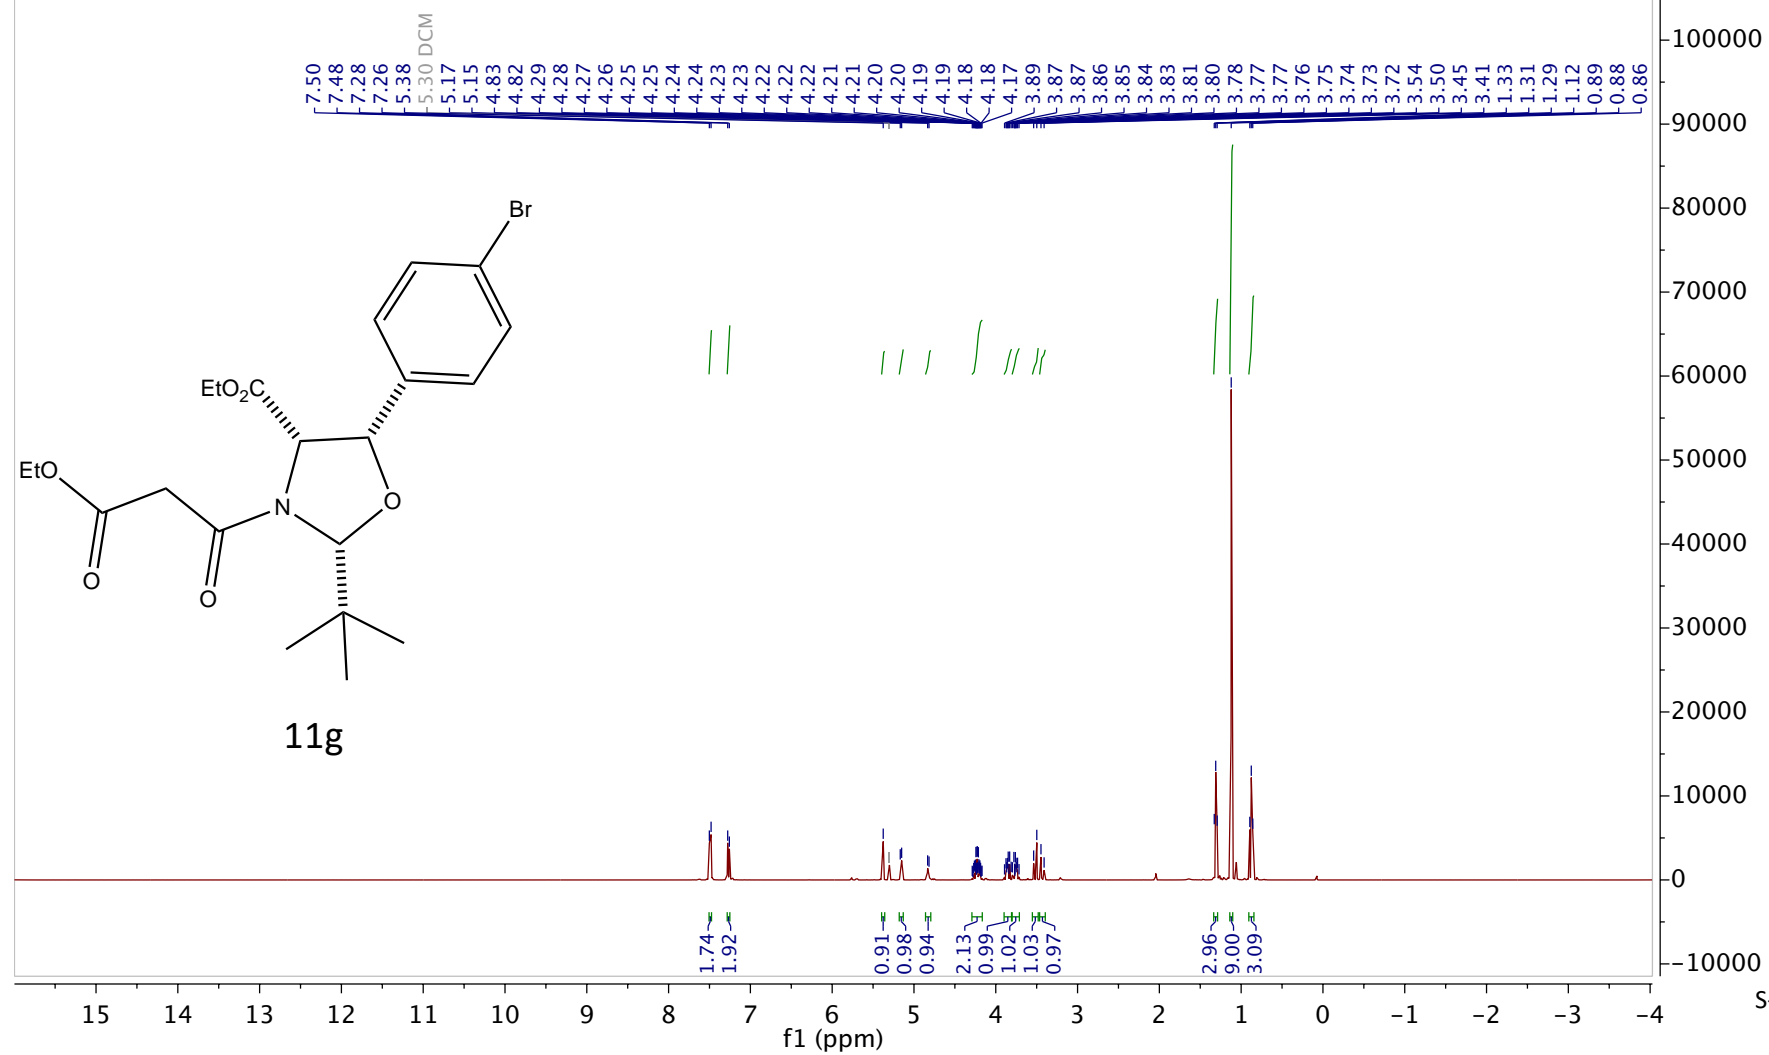

Jan31-2021-7-LS934(P) B12-C9.4.fid  
Instrument AVH400  
Group MGM  
Chemist Liban Saney  
Project Account Code DM7300  
c13acq\_512.crl CDCl3 {C:\NMR} mgmgrp 7

<sup>13</sup>C NMR (101 MHz, CDCl<sub>3</sub>)

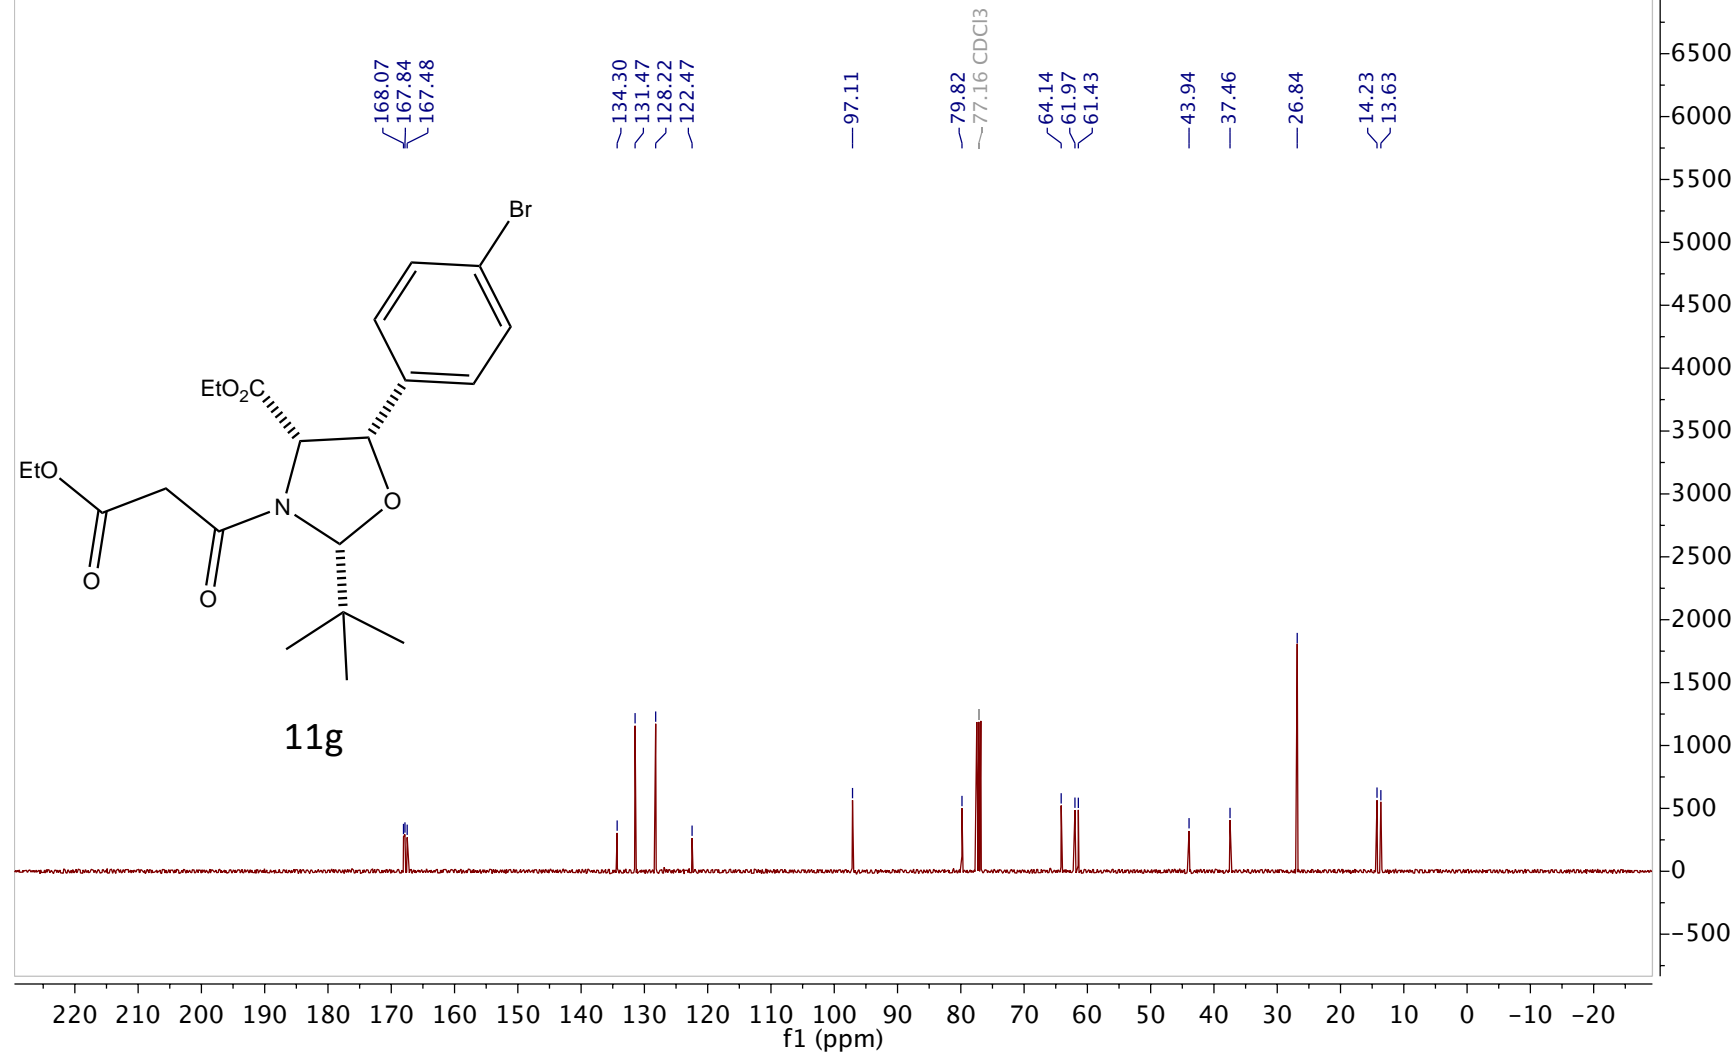

Jan31-2021-5-LS933(P) C8-D7.1.fid  
Instrument AVH400  
Group MGM  
Chemist Liban Saney  
Project Account Code DM7300  
h1acq.crl CDCl3 {C:\NMR} mgmgrp 5

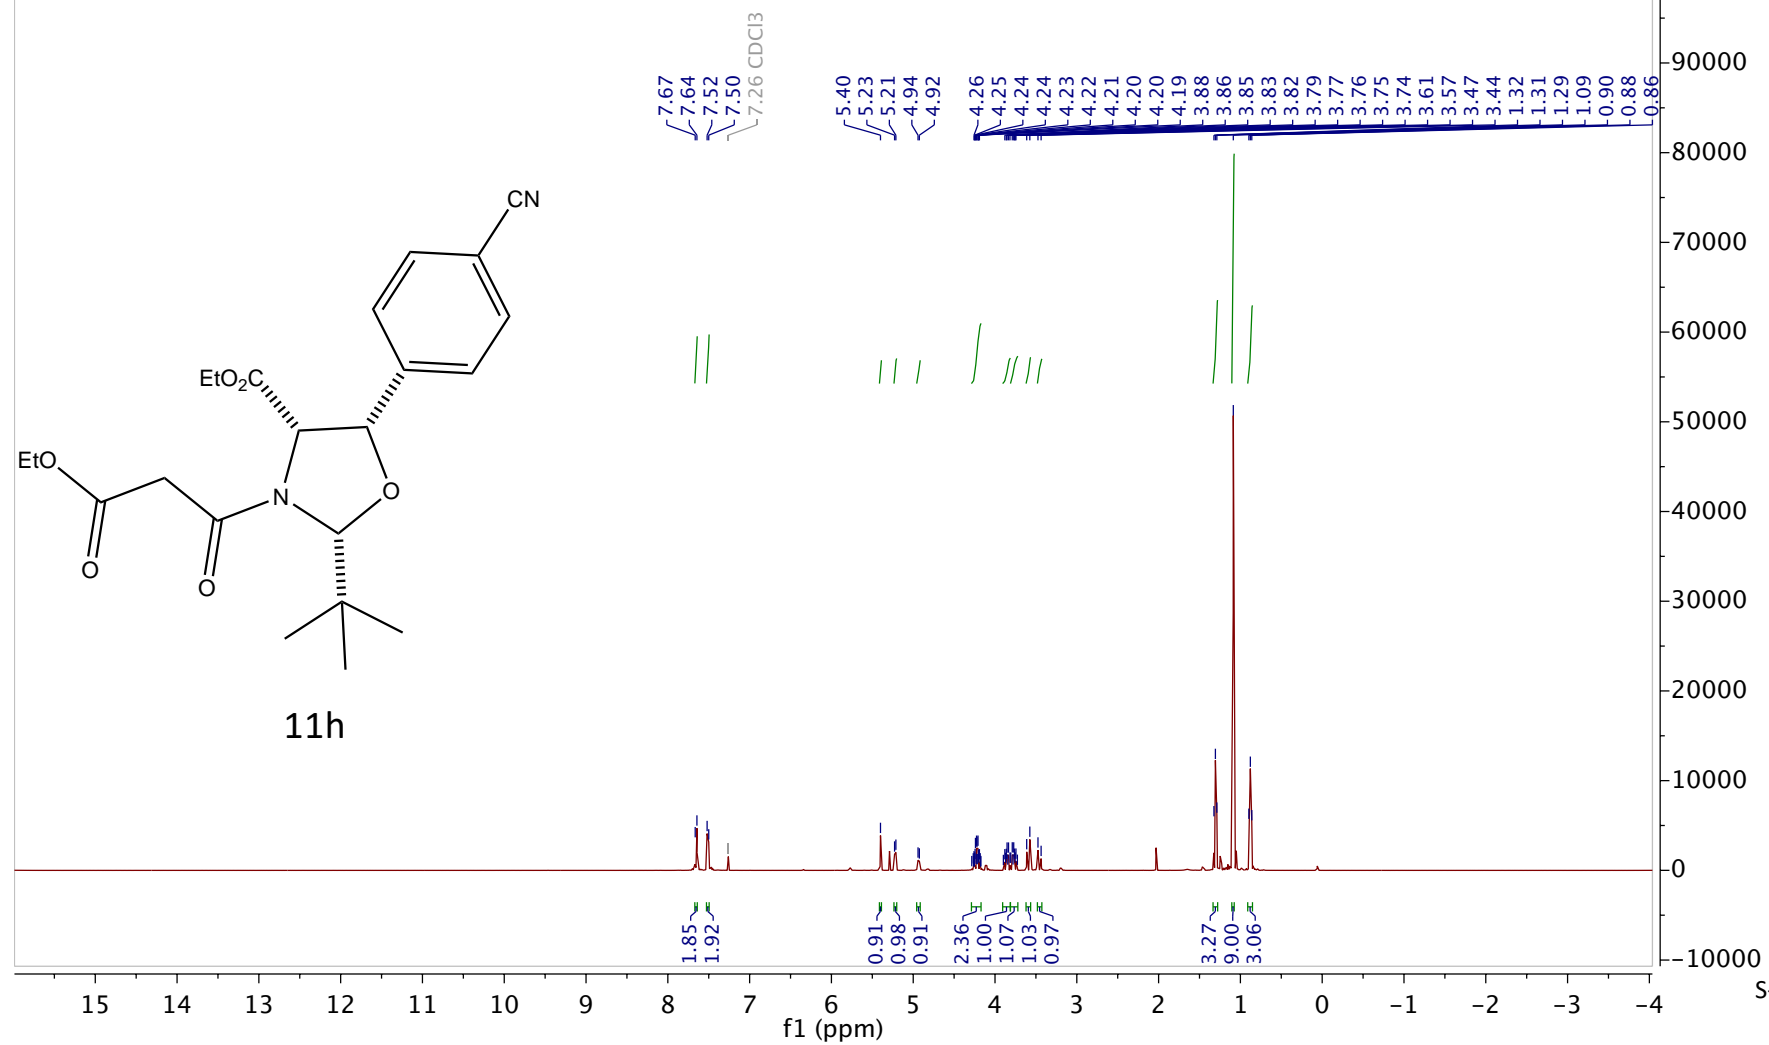

Jan31-2021-5-LS933(P) C8-D7.4.fid  
Instrument AVH400  
Group MGM  
Chemist Liban Saney  
Project Account Code DM7300  
c13acq\_512.crl CDCl3 {C:\NMR} mgmgrp 5

<sup>13</sup>C NMR (101 MHz, CDCl<sub>3</sub>)

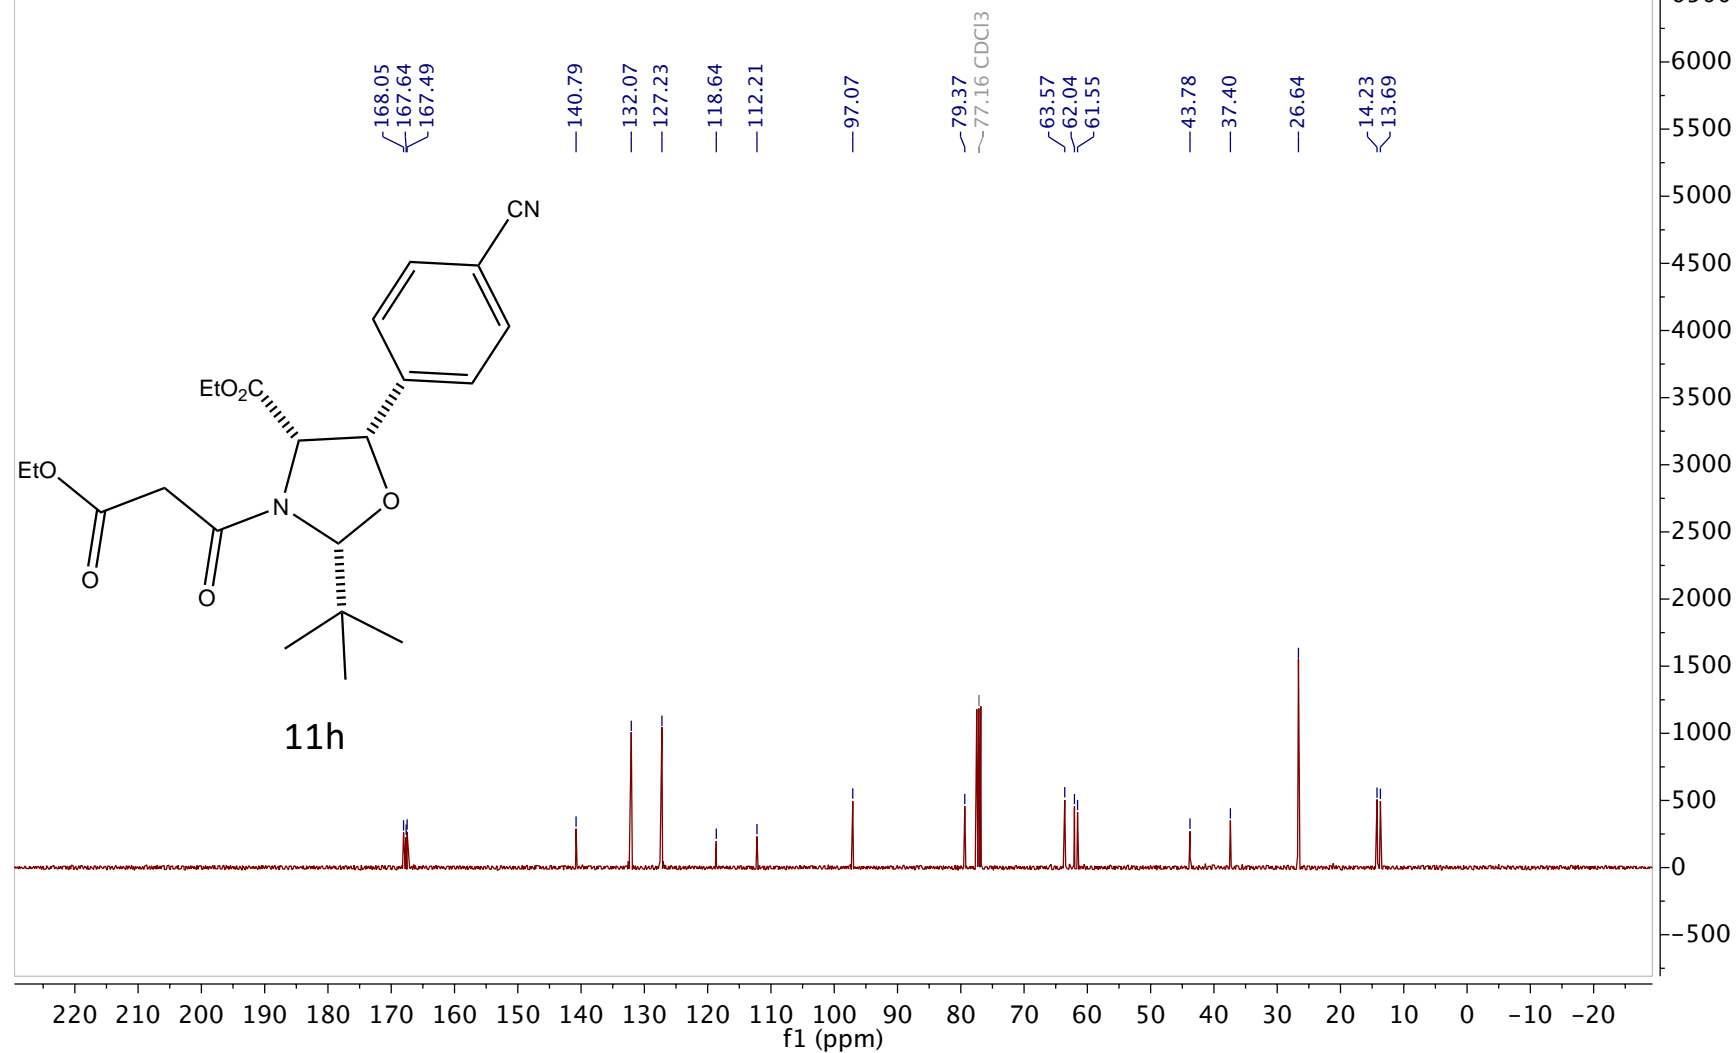

Feb03-2021-54-LS936(P) B6-C9.1.fid  
Instrument AVH400  
Group MGM  
Chemist Liban Saney  
Project Account Code DM7300  
h1acq.crl CDCl3 {C:\NMR} mgmgrp 54

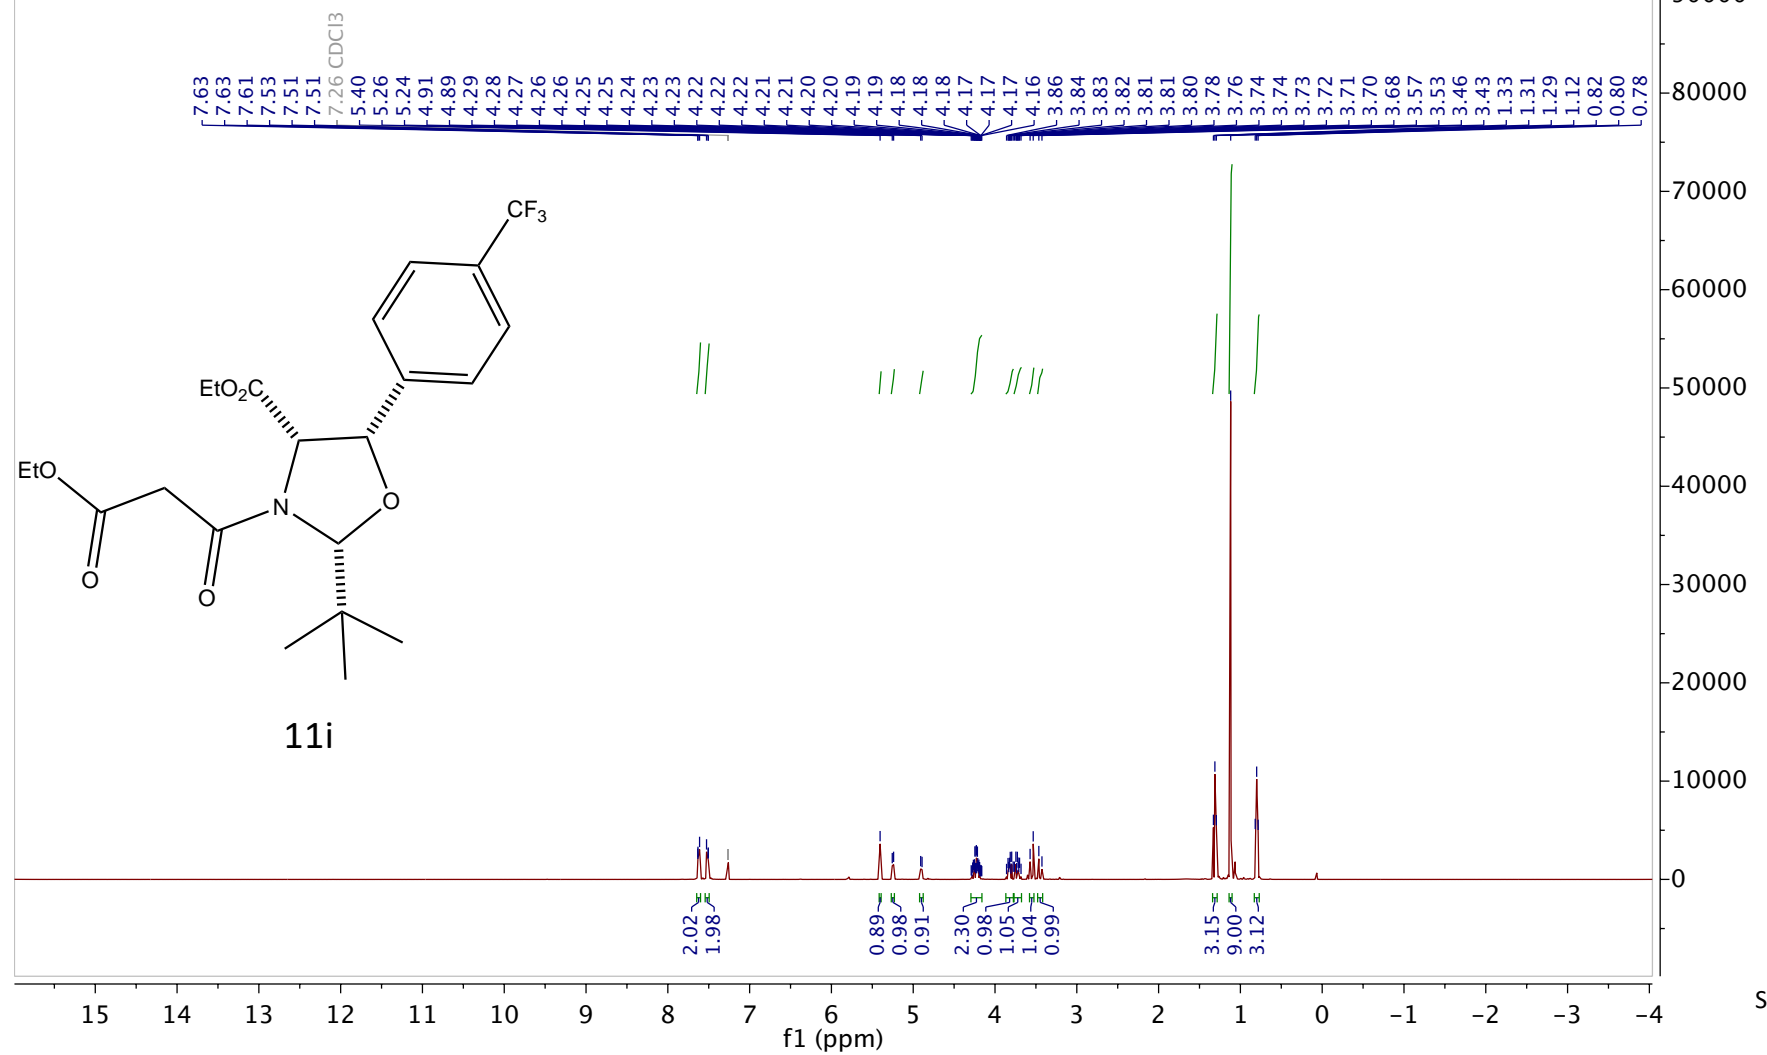



Feb03-2021-54-LS936(P) B6-C9.4.fid  
Instrument AVH400  
Group MGM  
Chemist Liban Saney  
Project Account Code DM7300  
c13acq\_512.crl CDCl3 {C:\NMR} mgmgrp 54

<sup>13</sup>C NMR (101 MHz, CDCl<sub>3</sub>)

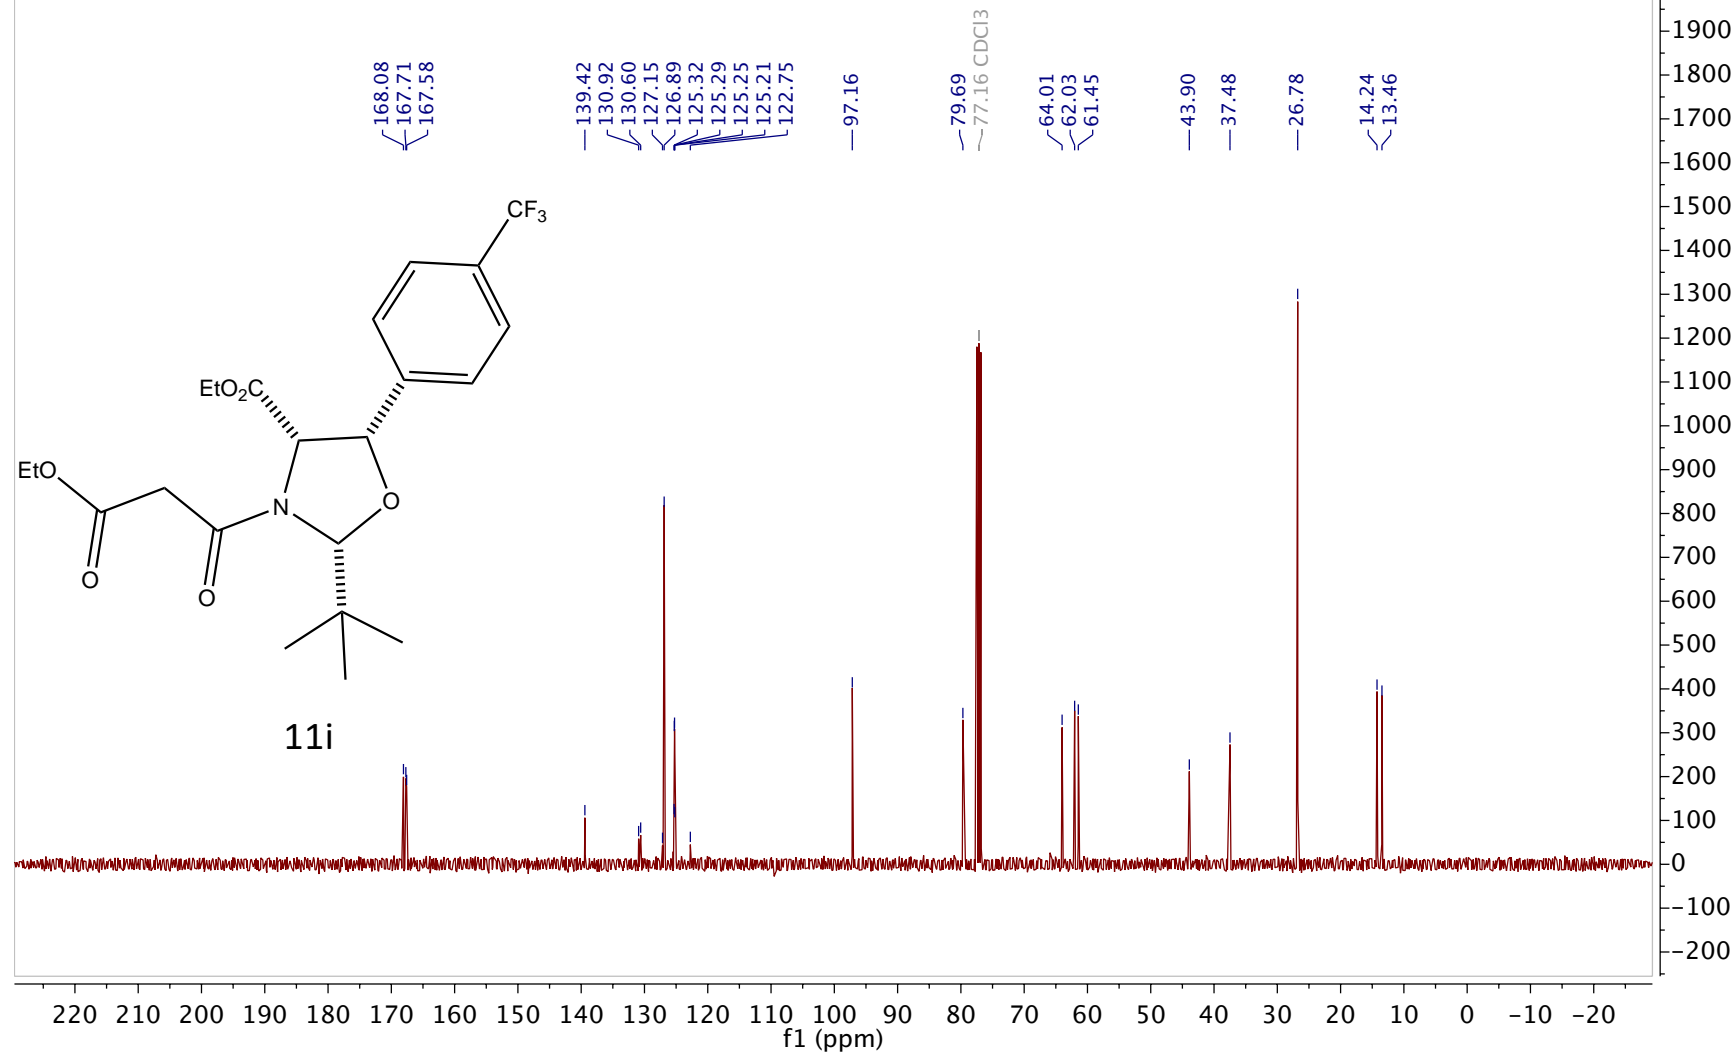

Feb03-2021-54-LS936(P) B6-C9.6.fid  
Instrument AVH400  
Group MGM  
Chemist Liban Saney  
Project Account Code DM7300  
f19dec\_256.crl CDCl3 {C:\NMR} mgmgrp 54

$^{19}\text{F}$  NMR (376 MHz,  $\text{CDCl}_3$ )

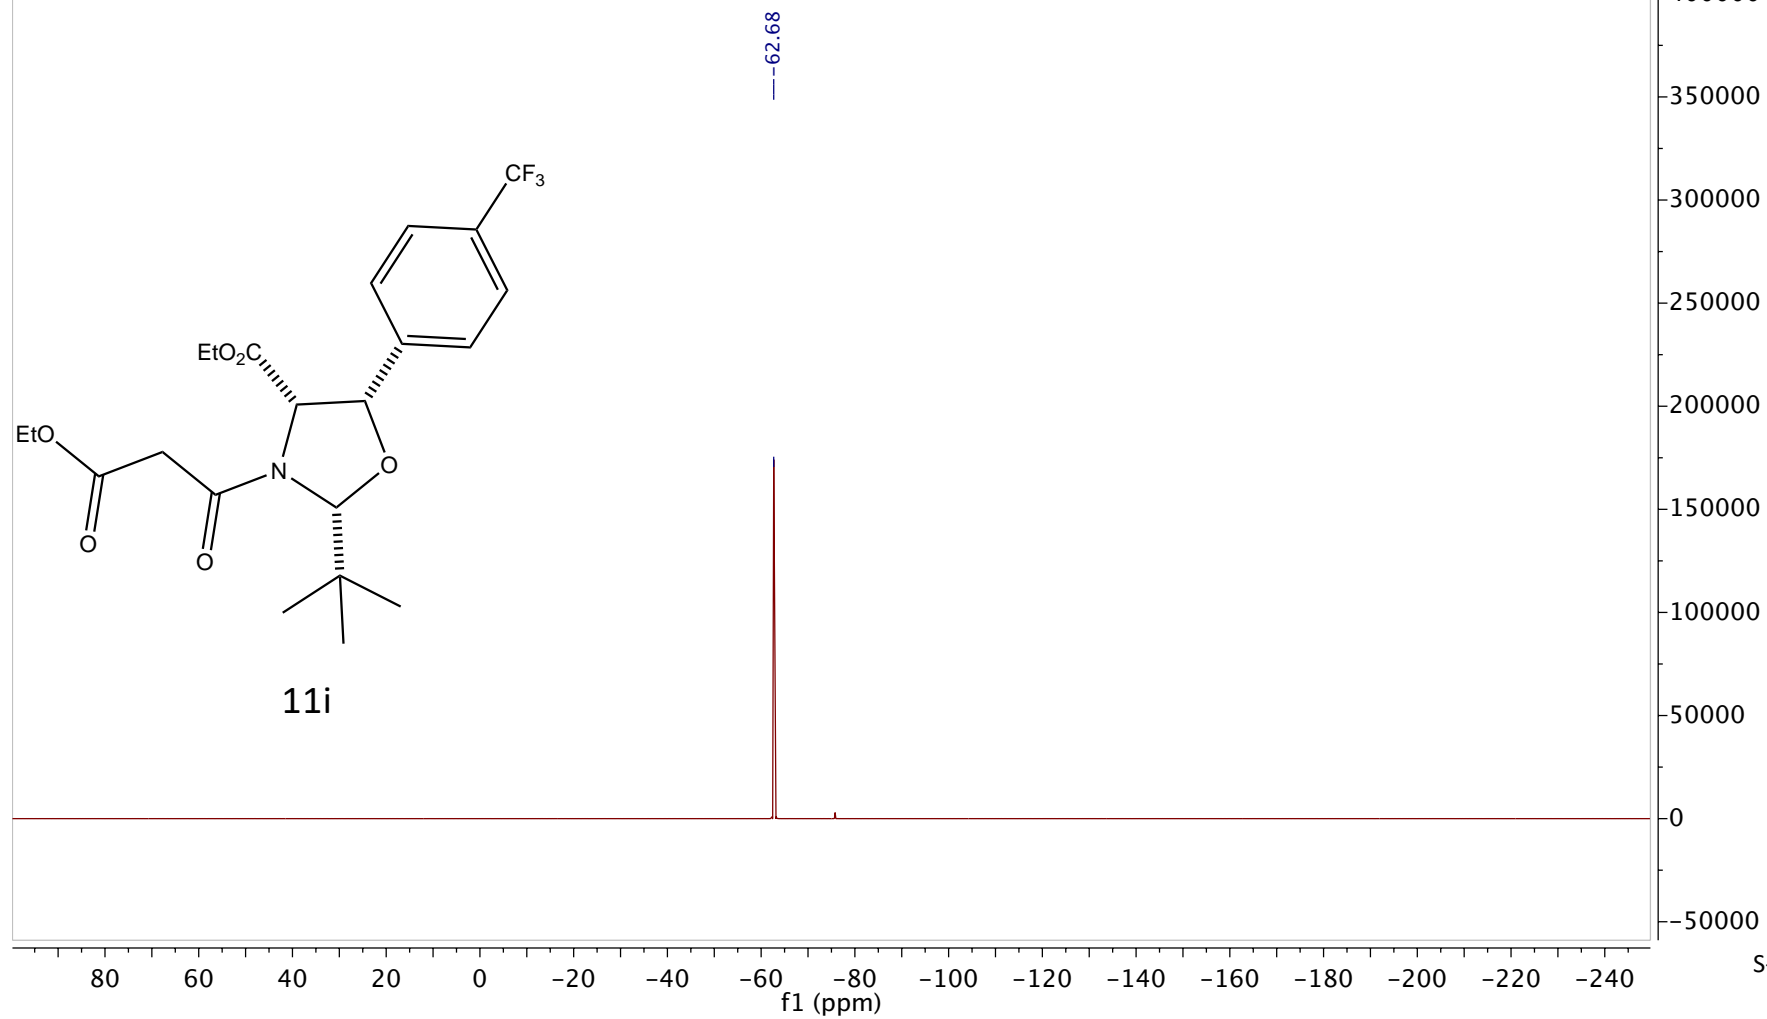

Jan31-2021-3-LS932(P) D4-D9.1.fid  
Instrument AVH400  
Group MGM  
Chemist Liban Saney  
Project Account Code DM7300  
h1acq.crl CDCl3 {C:\NMR} mgmgrp 3

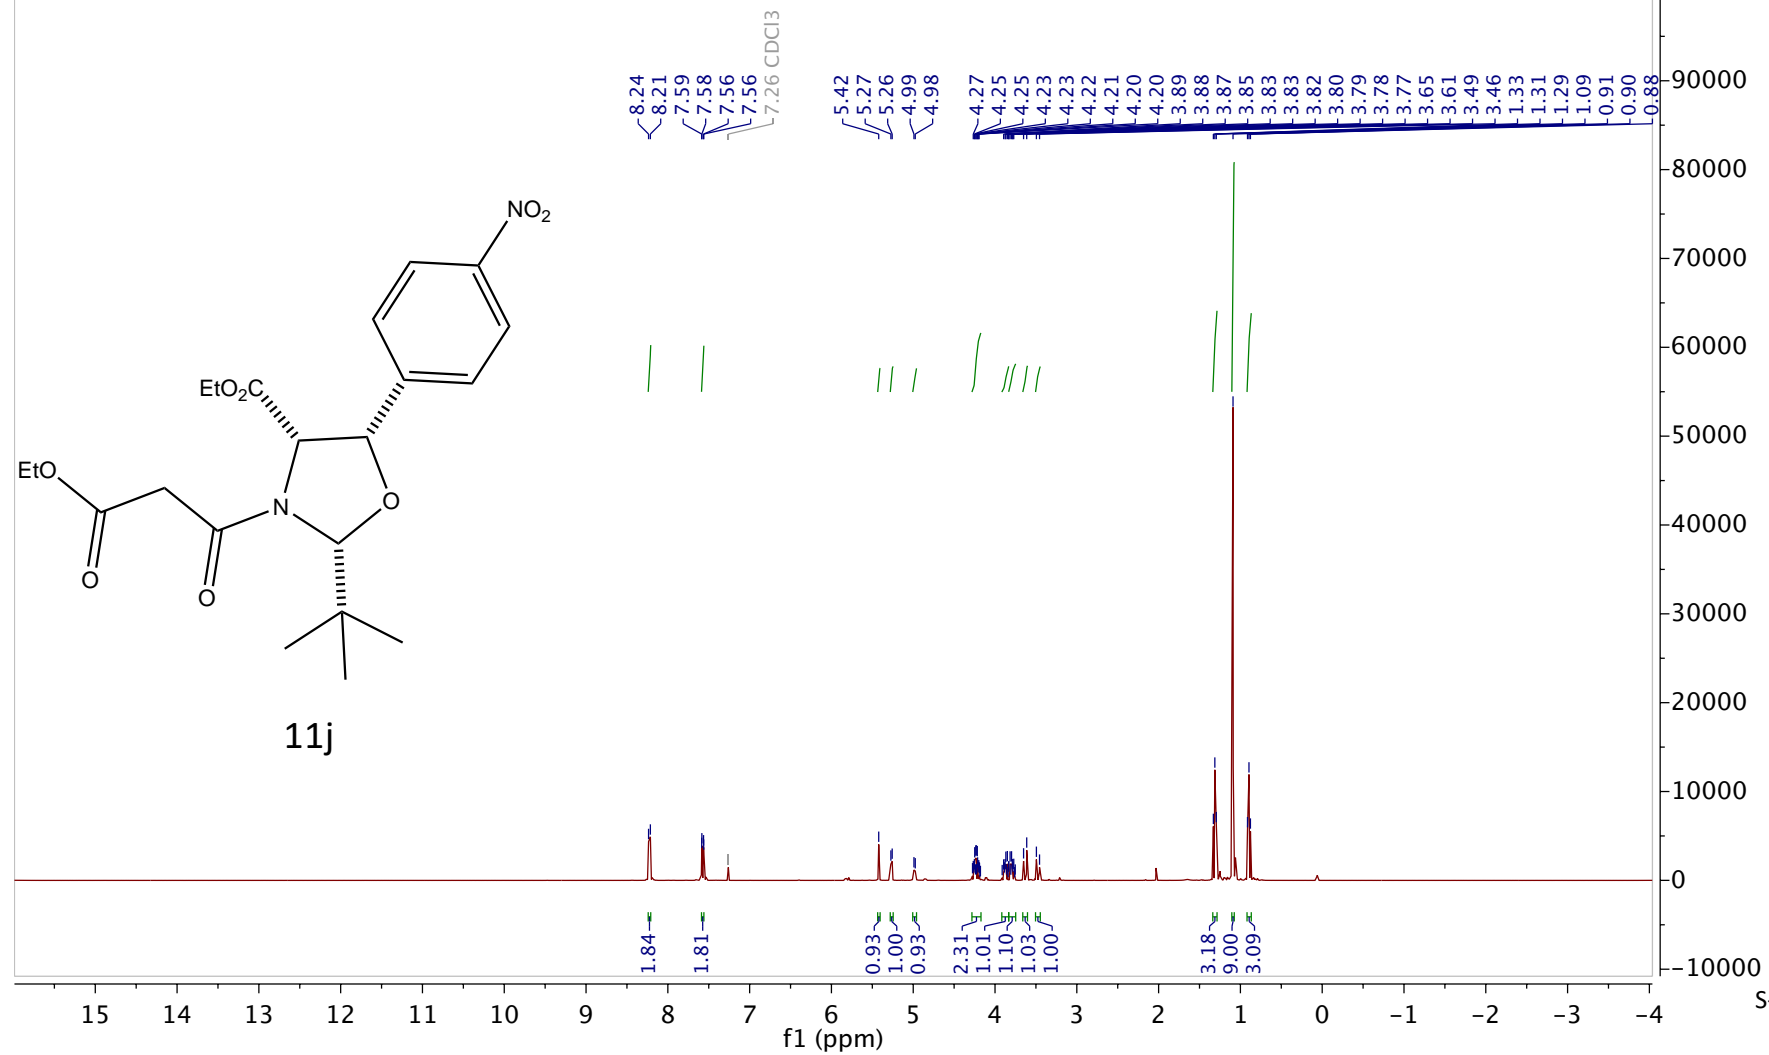

Jan31-2021-3-LS932(P) D4-D9.4.fid  
Instrument AVH400  
Group MGM  
Chemist Liban Saney  
Project Account Code DM7300  
c13acq\_512.crl CDCl3 {C:\NMR} mgmgrp 3

<sup>13</sup>C NMR (101 MHz, CDCl<sub>3</sub>)

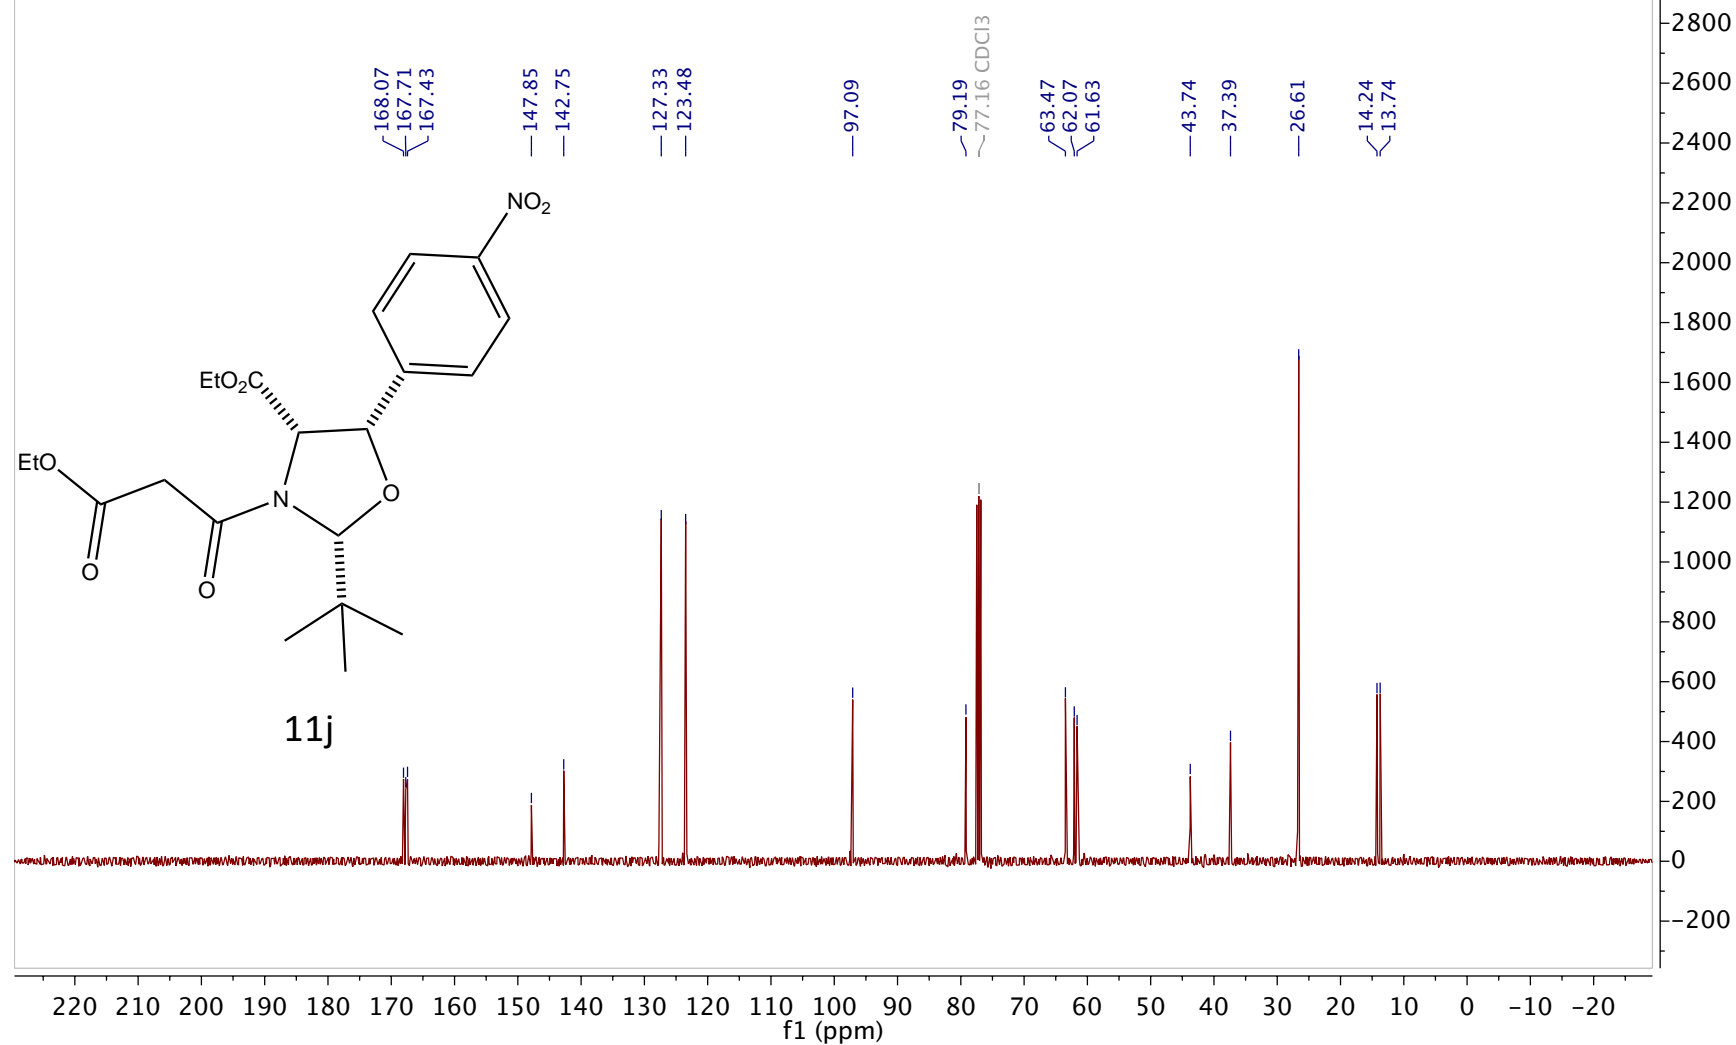

Feb07-2021-3-LS944(P) C10-D7.1.fid  
Instrument AVH400  
Group MGM  
Chemist Liban Saney  
Project Account Code DM7300  
h1acq.crl CDCl3 {C:\NMR} mgmgrp 3

<sup>1</sup>H NMR (400 MHz, CDCl<sub>3</sub>)

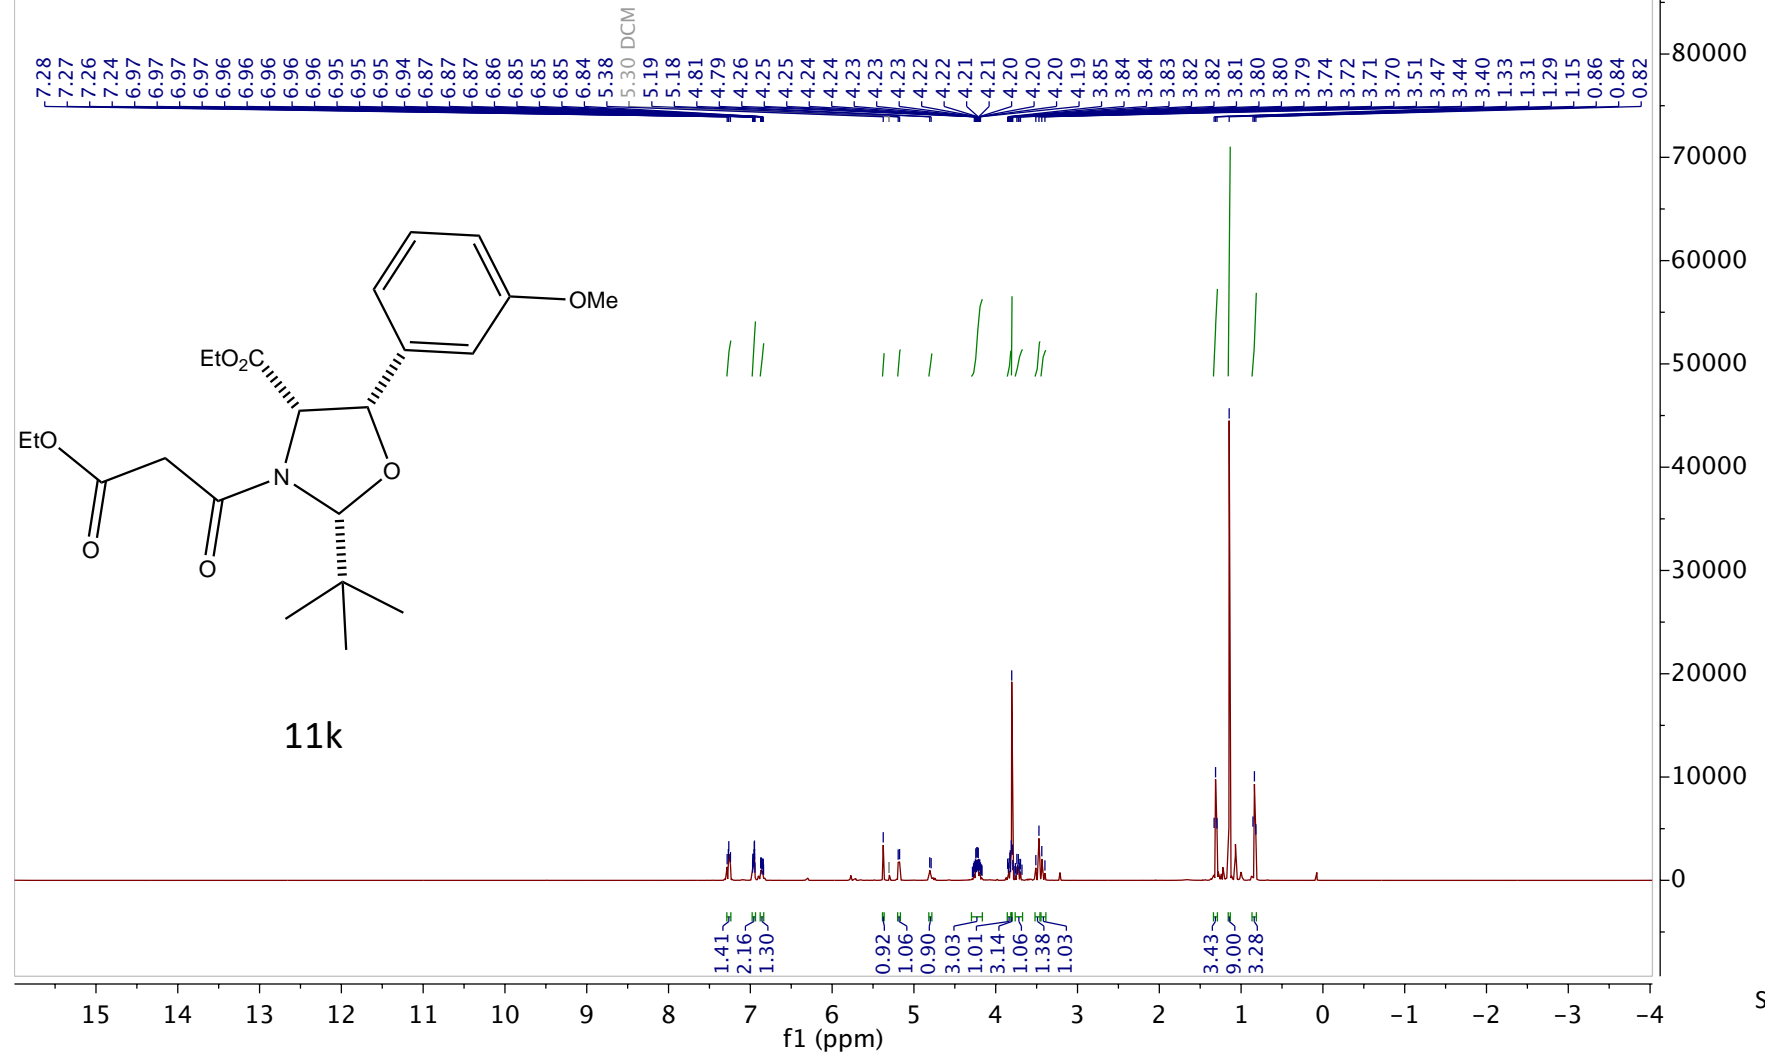

Feb07-2021-3-LS944(P) C10-D7.4.fid  
Instrument AVH400  
Group MGM  
Chemist Liban Saney  
Project Account Code DM7300  
c13acq\_512.crl CDCl3 {C:\NMR} mgmgrp 3

<sup>13</sup>C NMR (101 MHz, CDCl<sub>3</sub>)

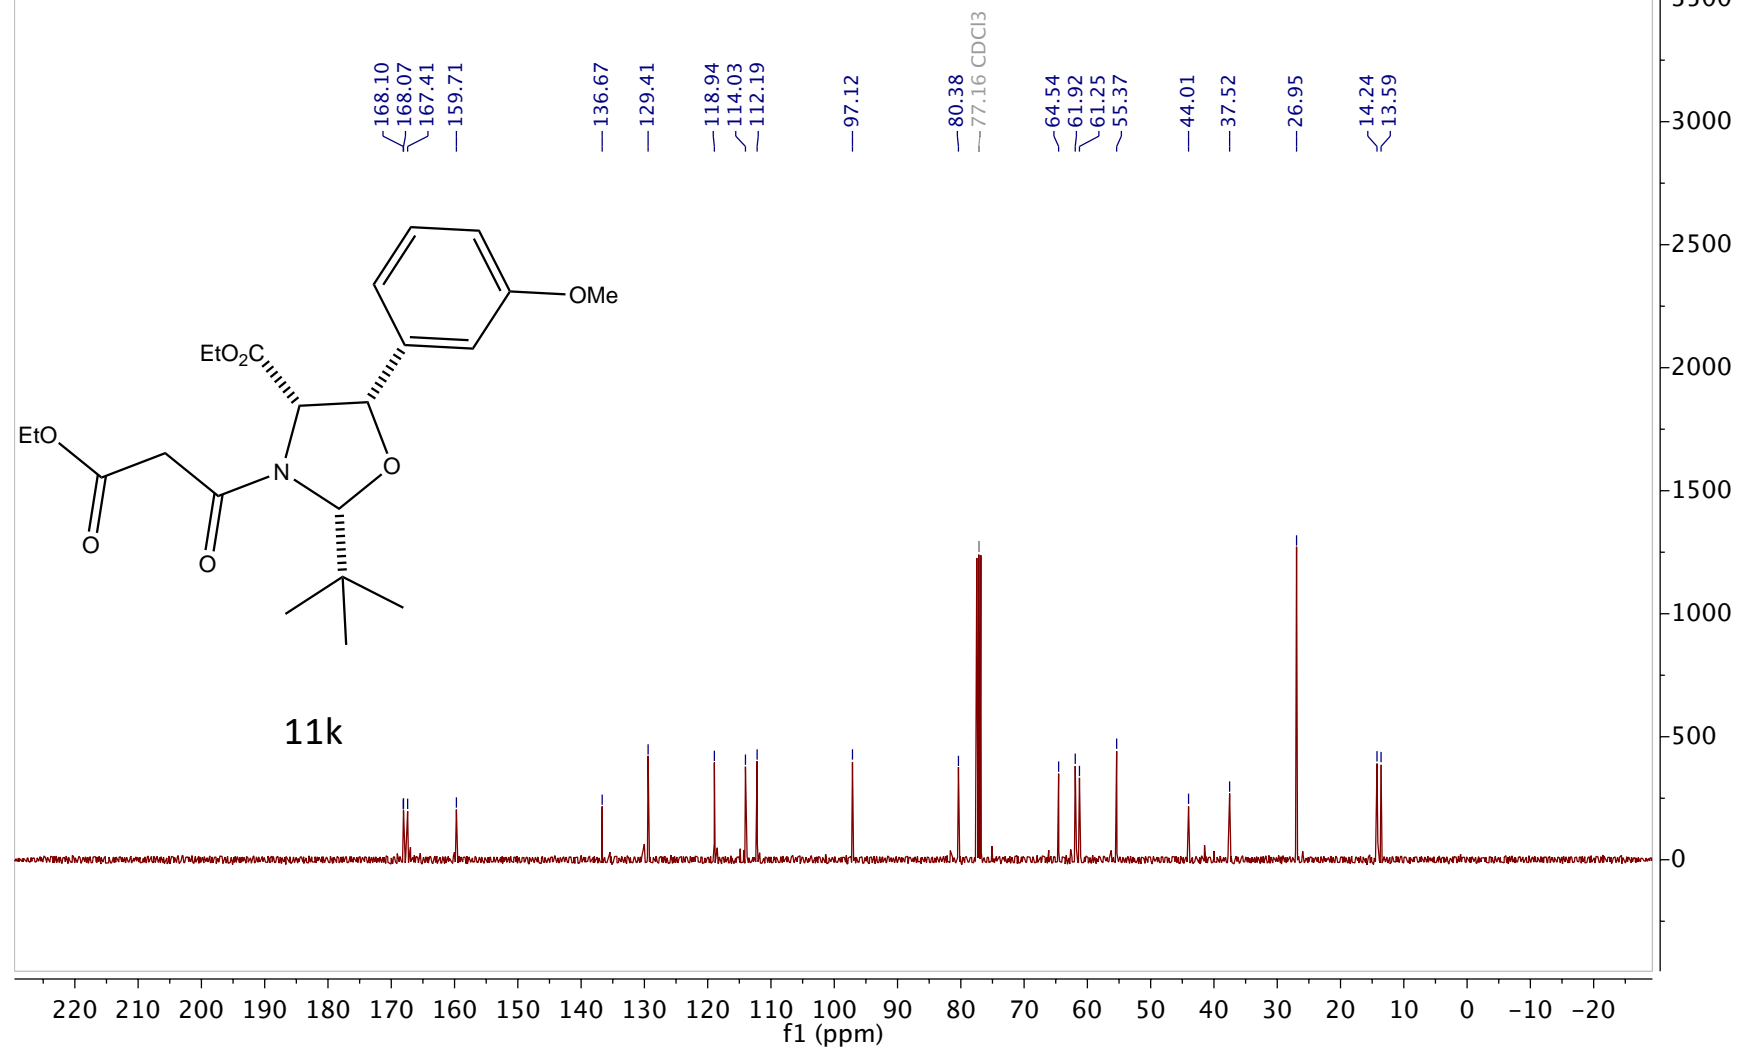

Feb03-2021-57-LS937(P) C6-D4.1.fid  
Instrument AVH400  
Group MGM  
Chemist Liban Saney  
Project Account Code DM7300  
h1acq.crl CDCl3 {C:\NMR} mgmgrp 57

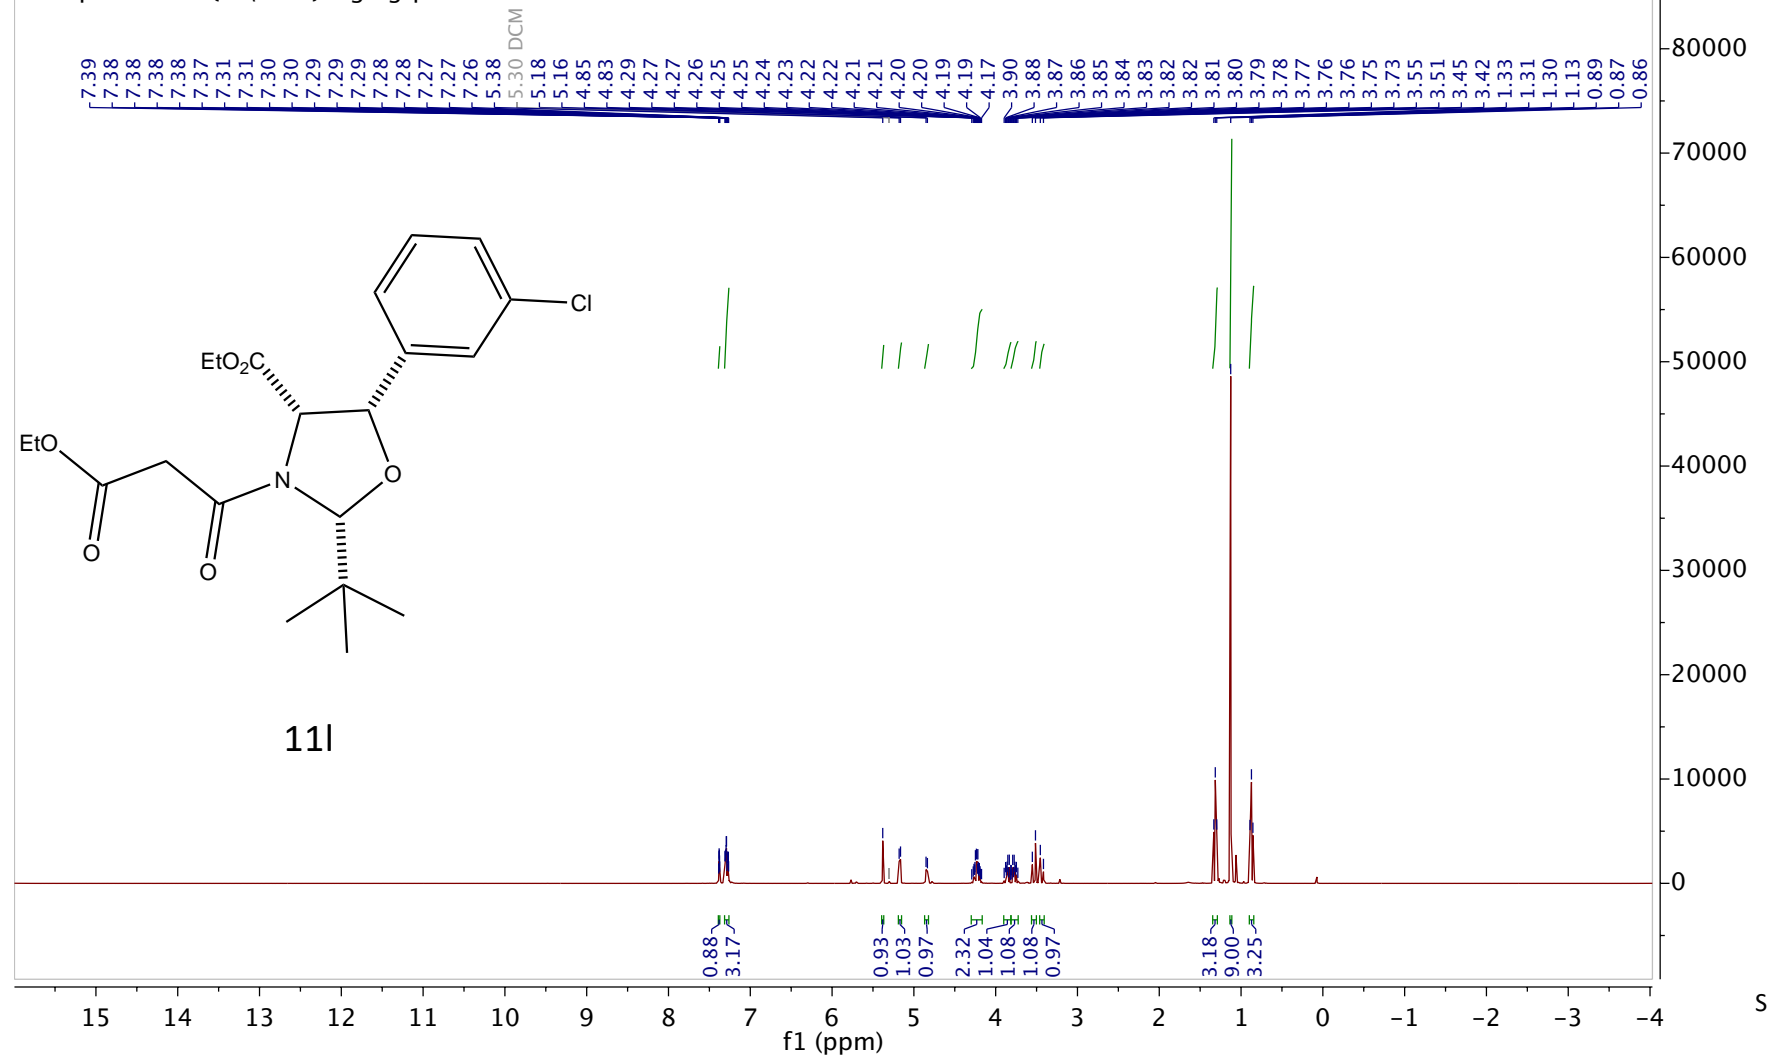

Feb03-2021-57-LS937(P) C6-D4.4.fid  
Instrument AVH400  
Group MGM  
Chemist Liban Saney  
Project Account Code DM7300  
c13acq\_512.crl CDCl3 {C:\NMR} mgmgrp 57

<sup>13</sup>C NMR (101 MHz, CDCl<sub>3</sub>)

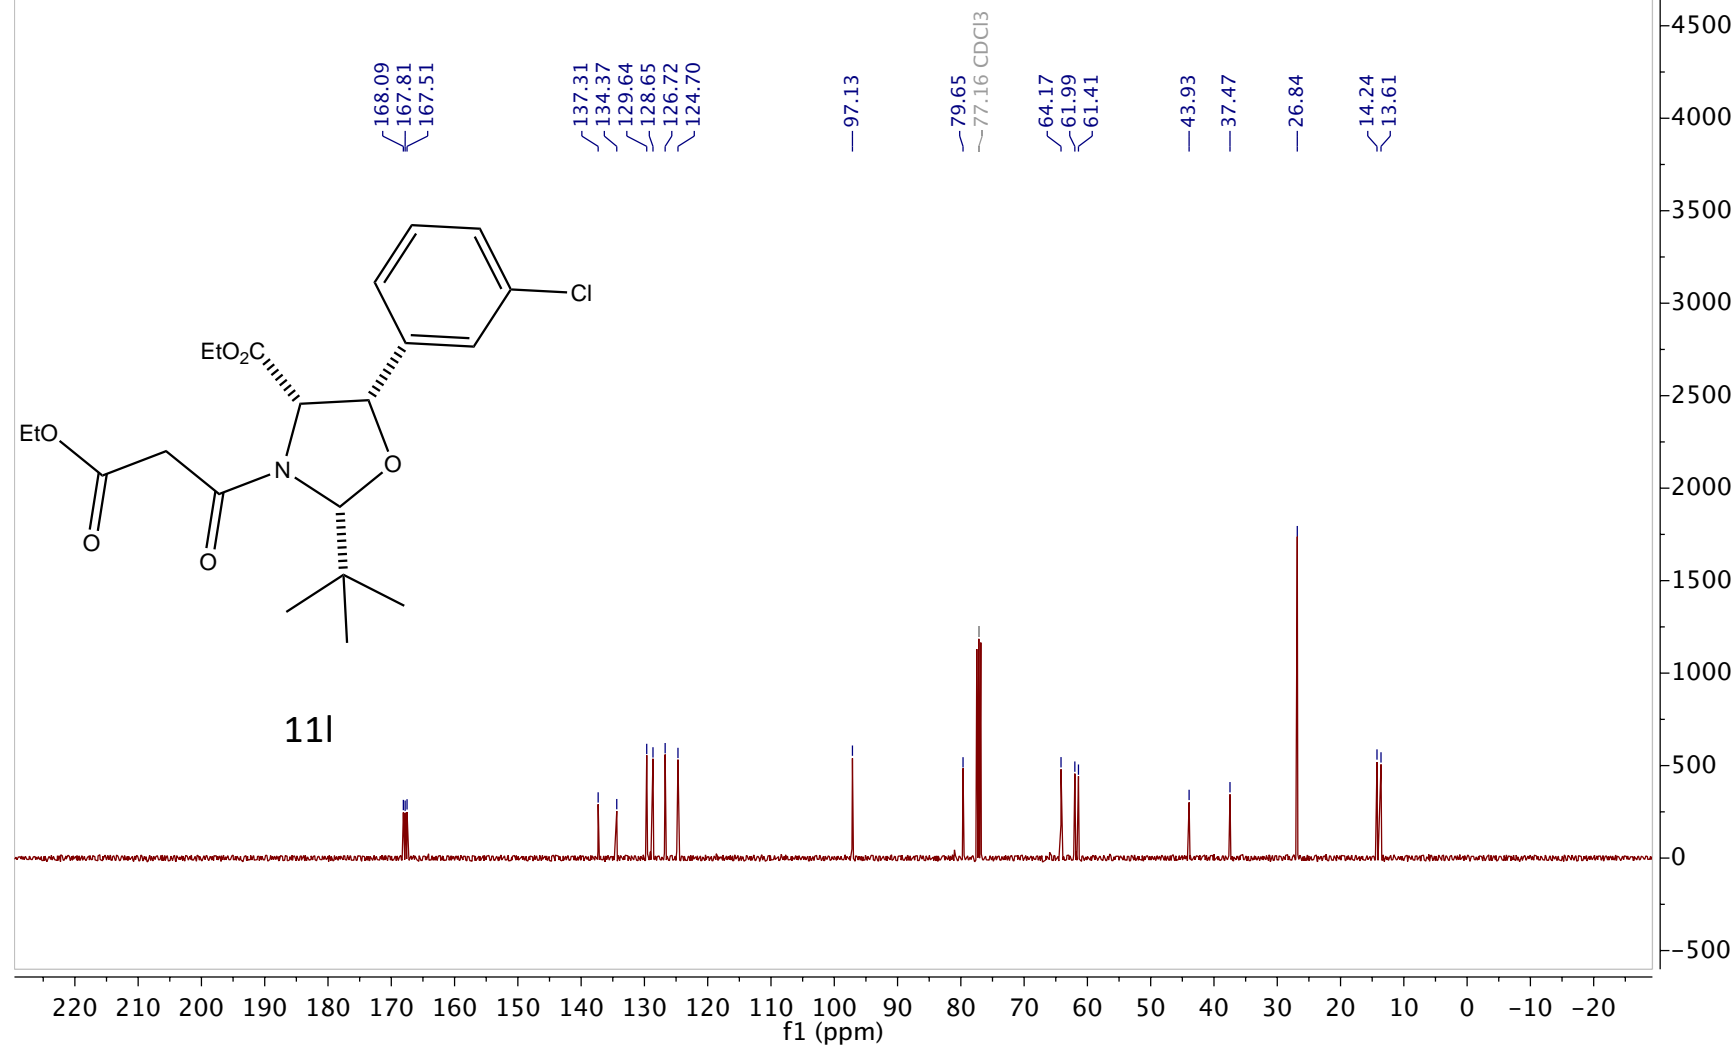



Feb19-2021-29-LS958(P) C2-D7.1.fid  
Instrument AVH400  
Group MGM  
Chemist Liban Saney  
Project Account Code DM7300  
h1acq.crl CDCl3 {C:\NMR} mgmgrp 29

<sup>1</sup>H NMR (400 MHz, CDCl<sub>3</sub>)

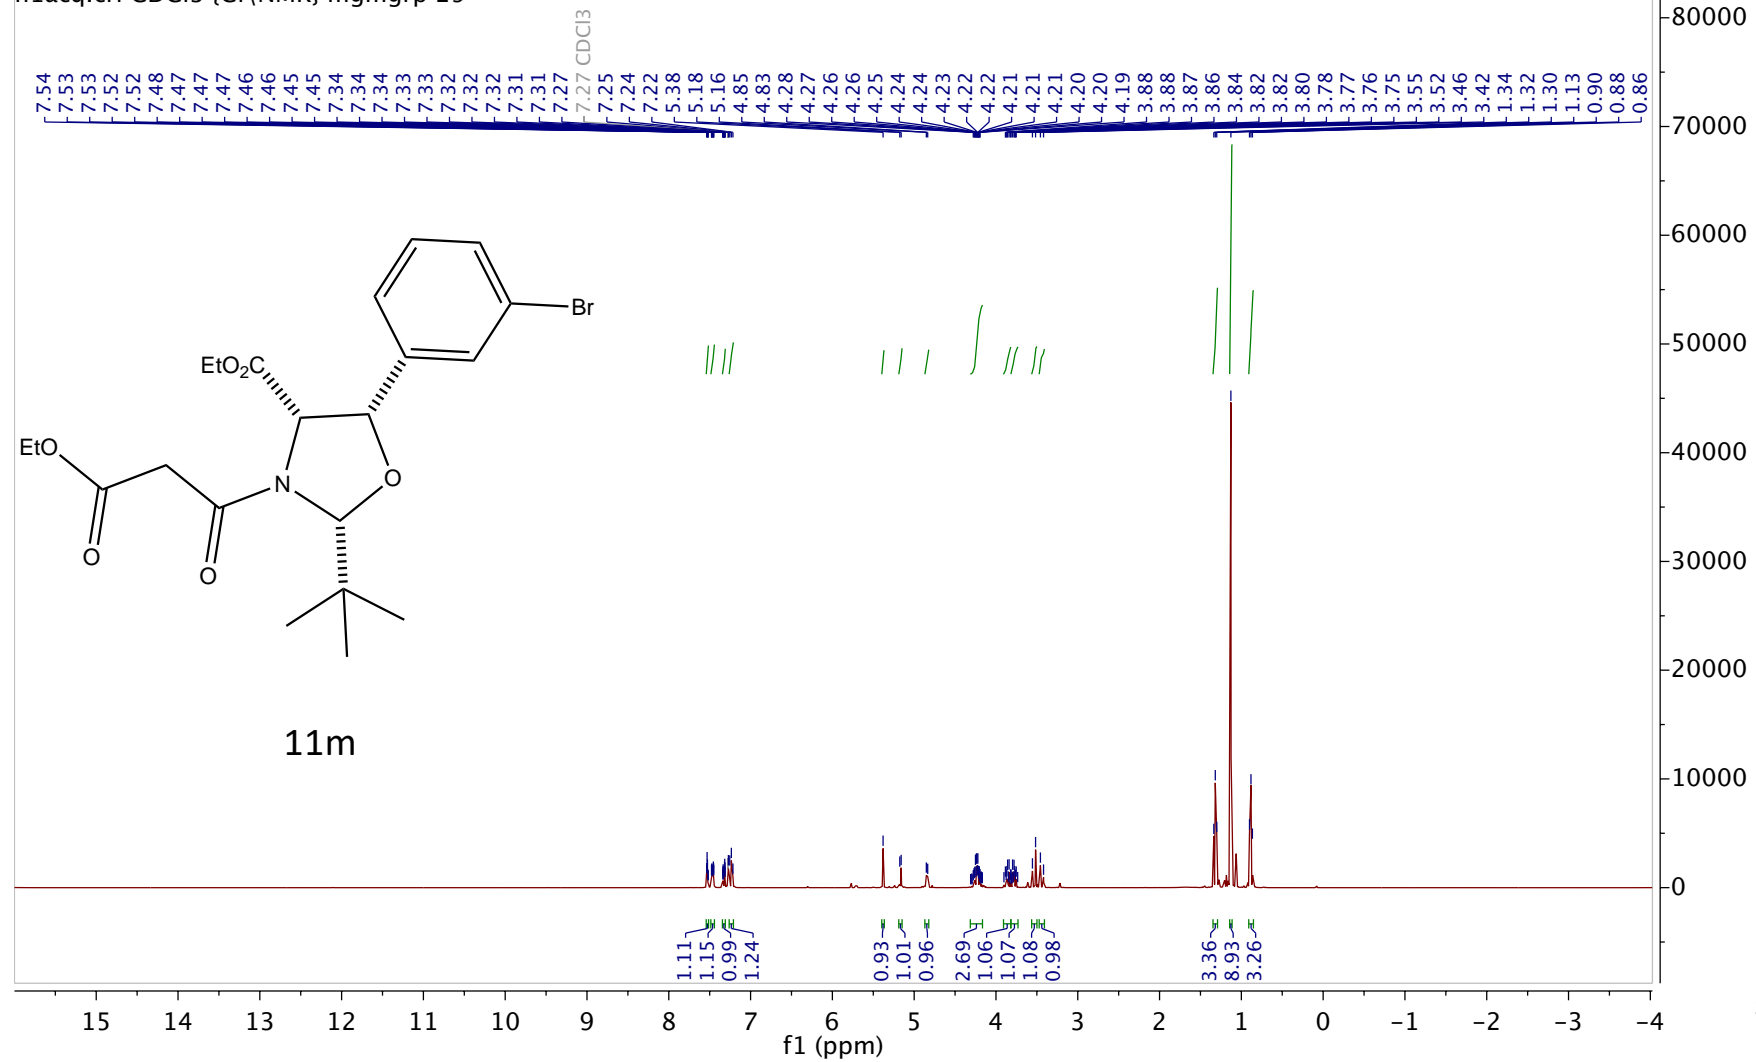

Feb19-2021-29-LS958(P) C2-D7.4.fid  
Instrument AVH400  
Group MGM  
Chemist Liban Saney  
Project Account Code DM7300  
c13acq\_512.crl CDCl3 {C:\NMR} mgmgrp 29

<sup>13</sup>C NMR (101 MHz, CDCl<sub>3</sub>)

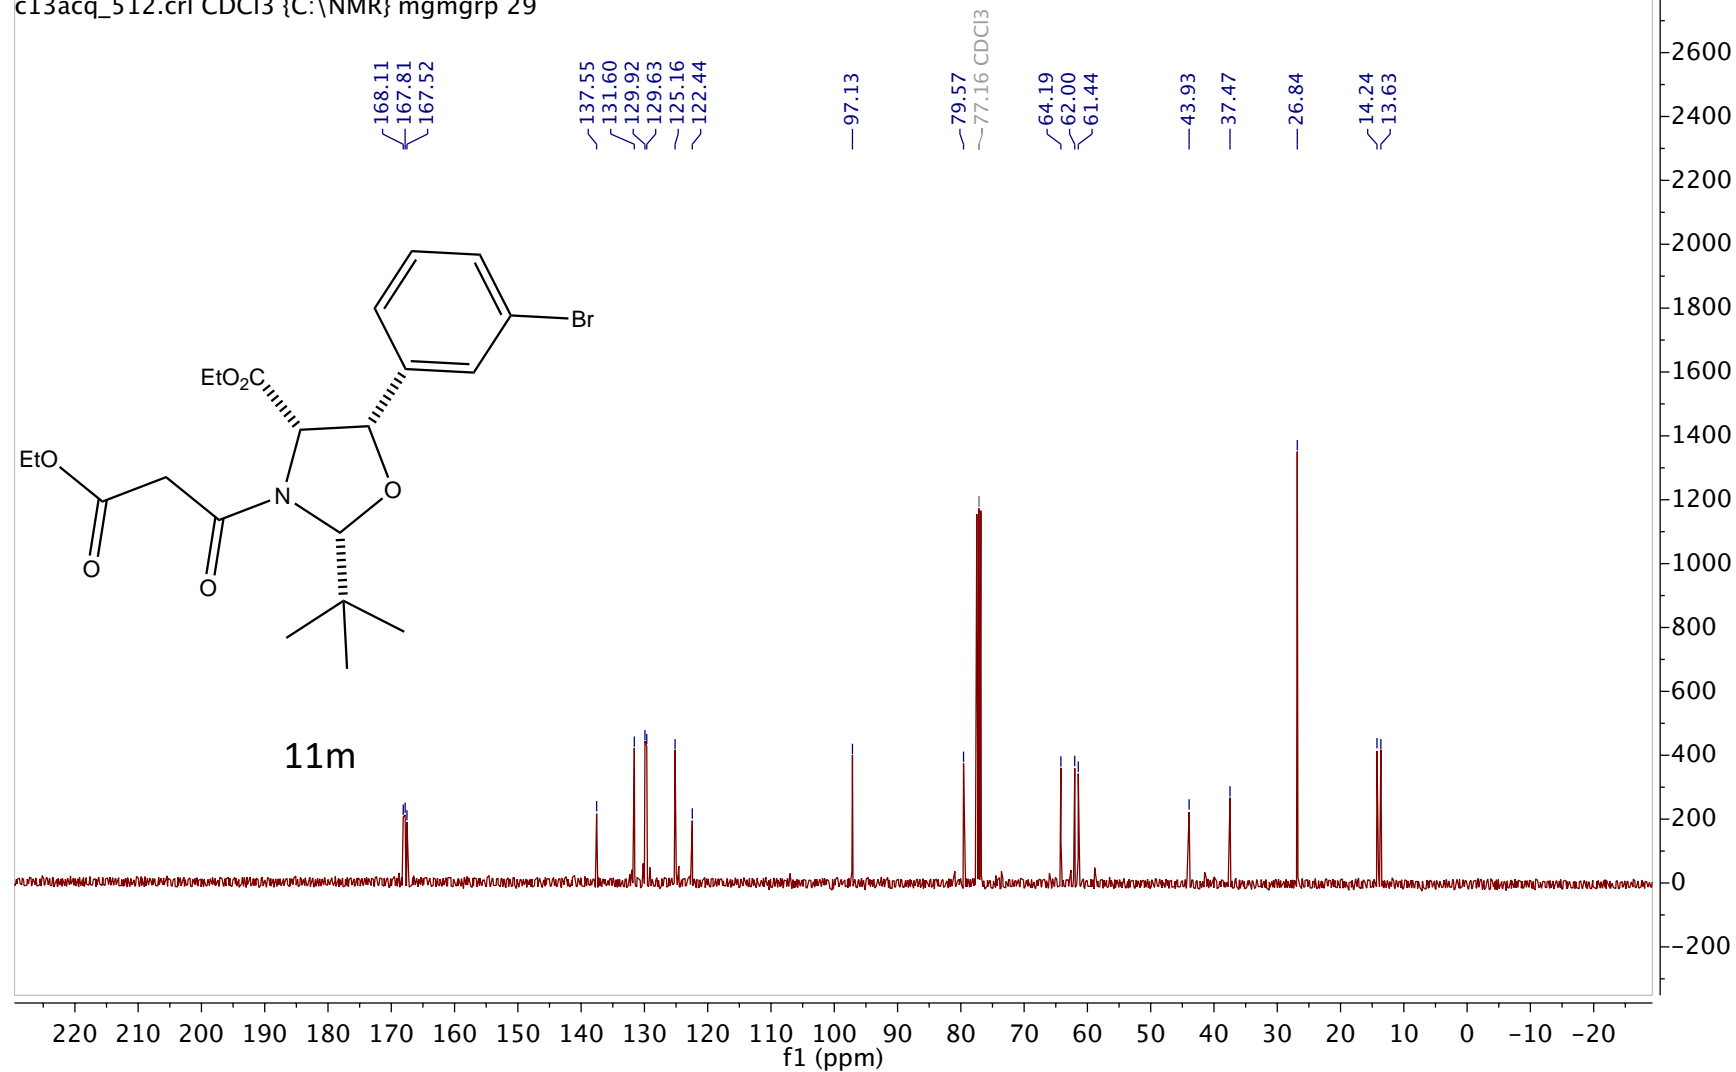

Feb03-2021-51-LS938(P) D4-D12.1.fid  
Instrument AVH400  
Group MGM  
Chemist Liban Saney  
Project Account Code DM7300  
h1acq.crl CDCl3 {C:\NMR} mgmgrp 51

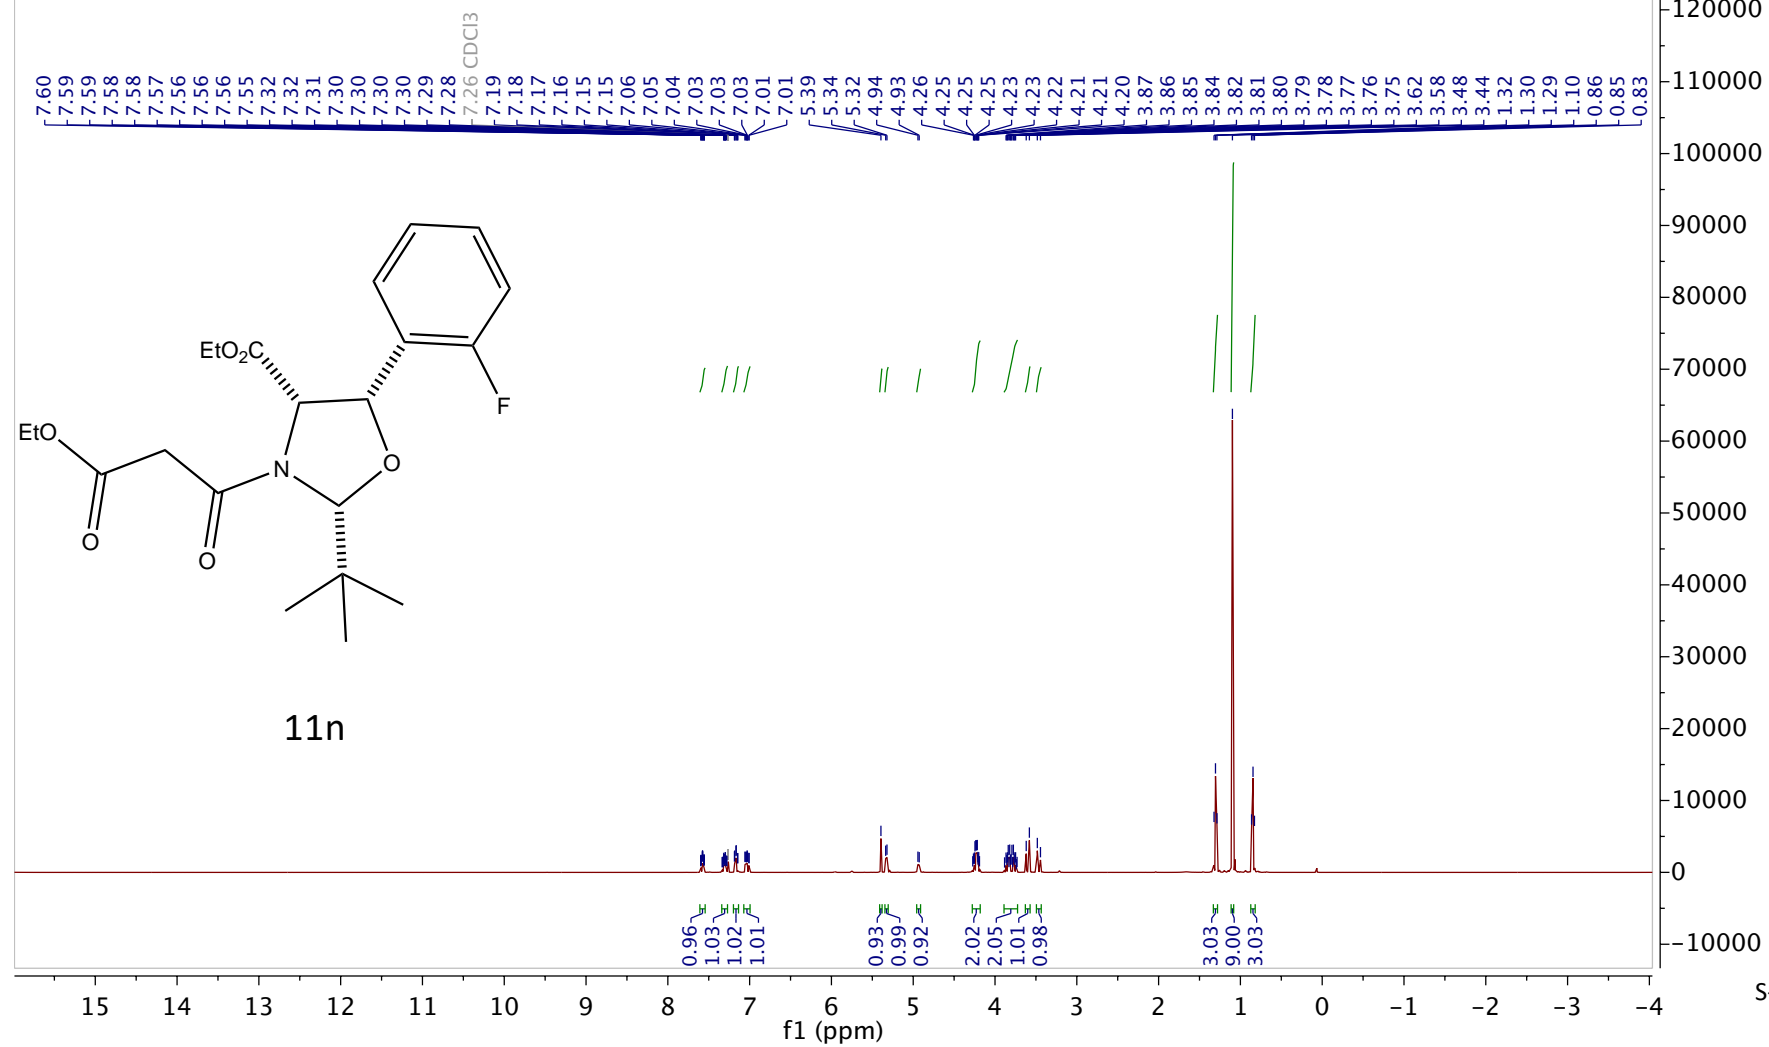

Feb03-2021-51-LS938(P) D4-D12.4.fid  
Instrument AVH400  
Group MGM  
Chemist Liban Saney  
Project Account Code DM7300  
c13acq\_512.crl CDCl3 {C:\NMR} mgmgrp 51

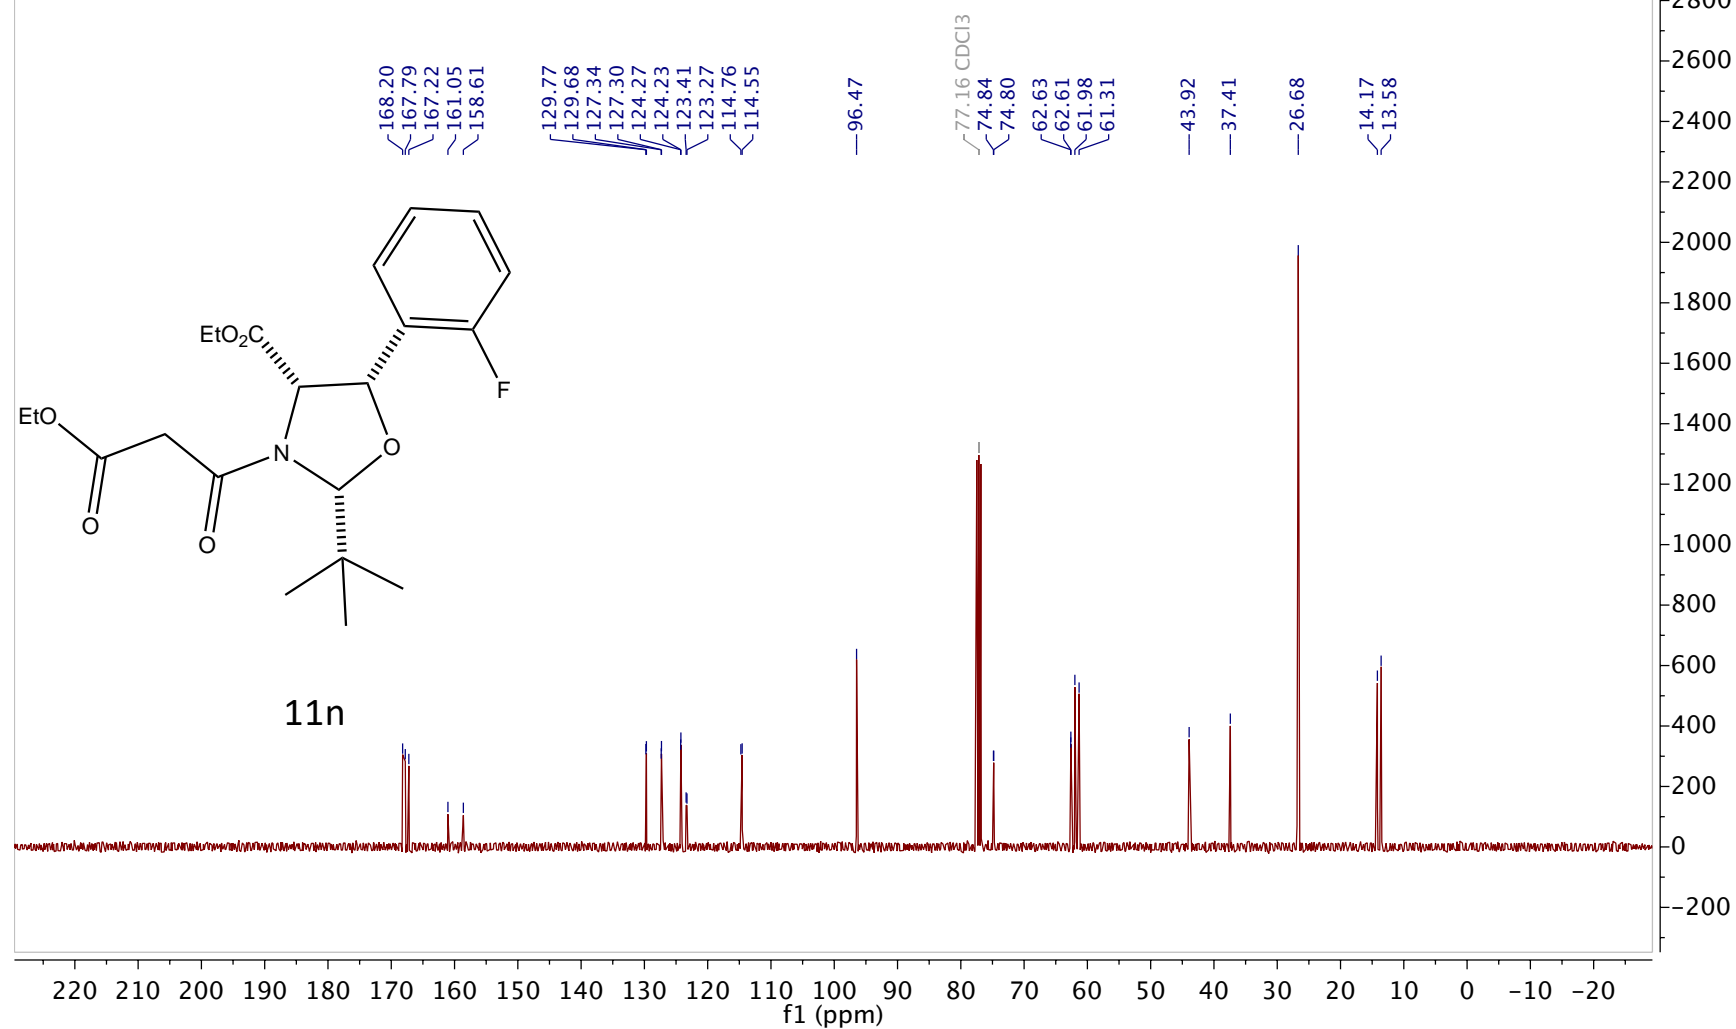

Feb03-2021-51-LS938(P) D4-D12.6.fid  
Instrument AVH400  
Group MGM  
Chemist Liban Saney  
Project Account Code DM7300  
f19dec\_256.crl CDCl3 {C:\NMR} mgmgrp 51

$^{19}\text{F}$  NMR (377 MHz,  $\text{CDCl}_3$ )

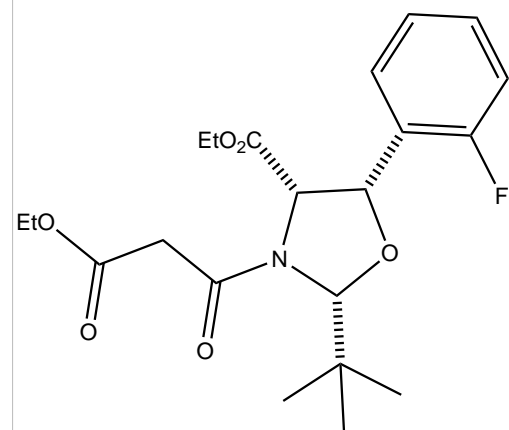

11n

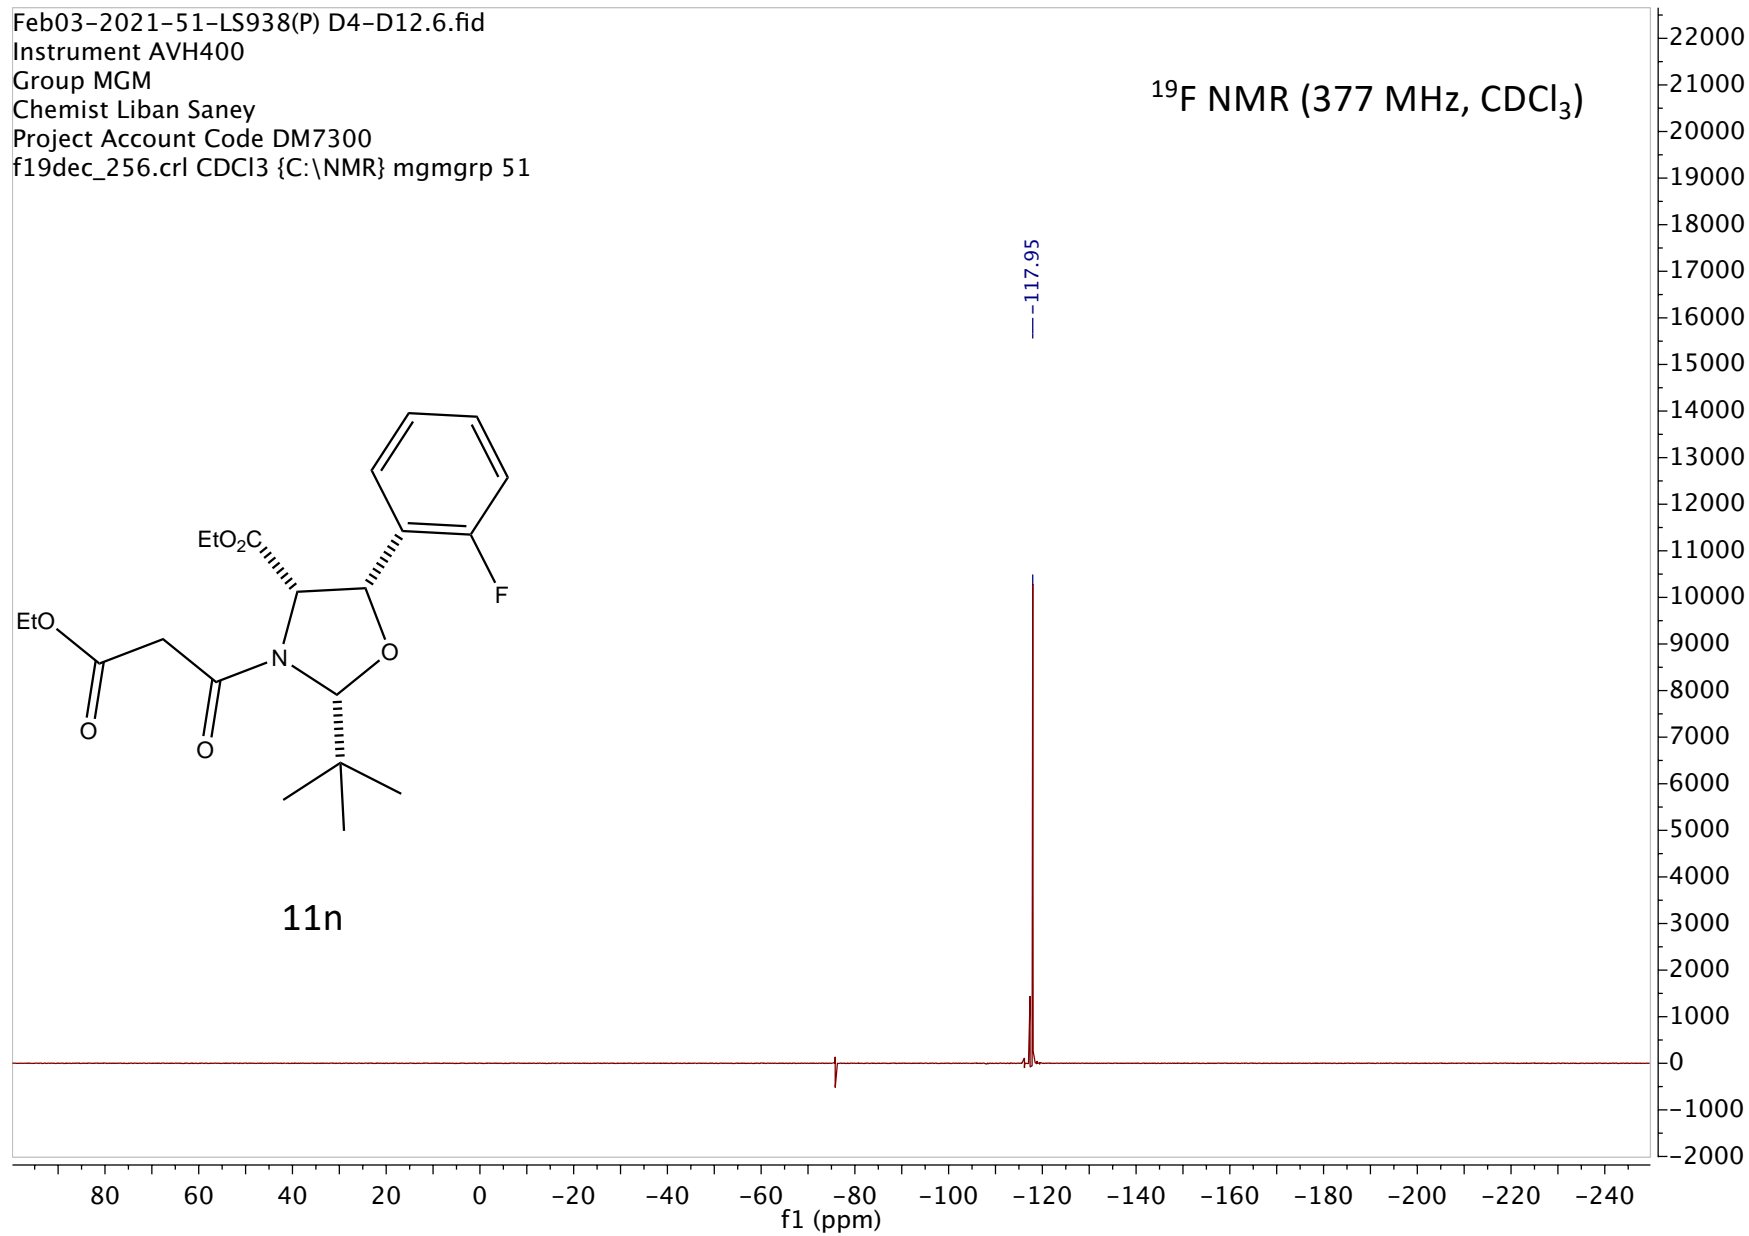

Feb19-2021-28-LS957(P) C2-C12.1.fid  
Instrument AVH400  
Group MGM  
Chemist Liban Saney  
Project Account Code DM7300  
h1acq.crl CDCl3 {C:\NMR} mgmgrp 28

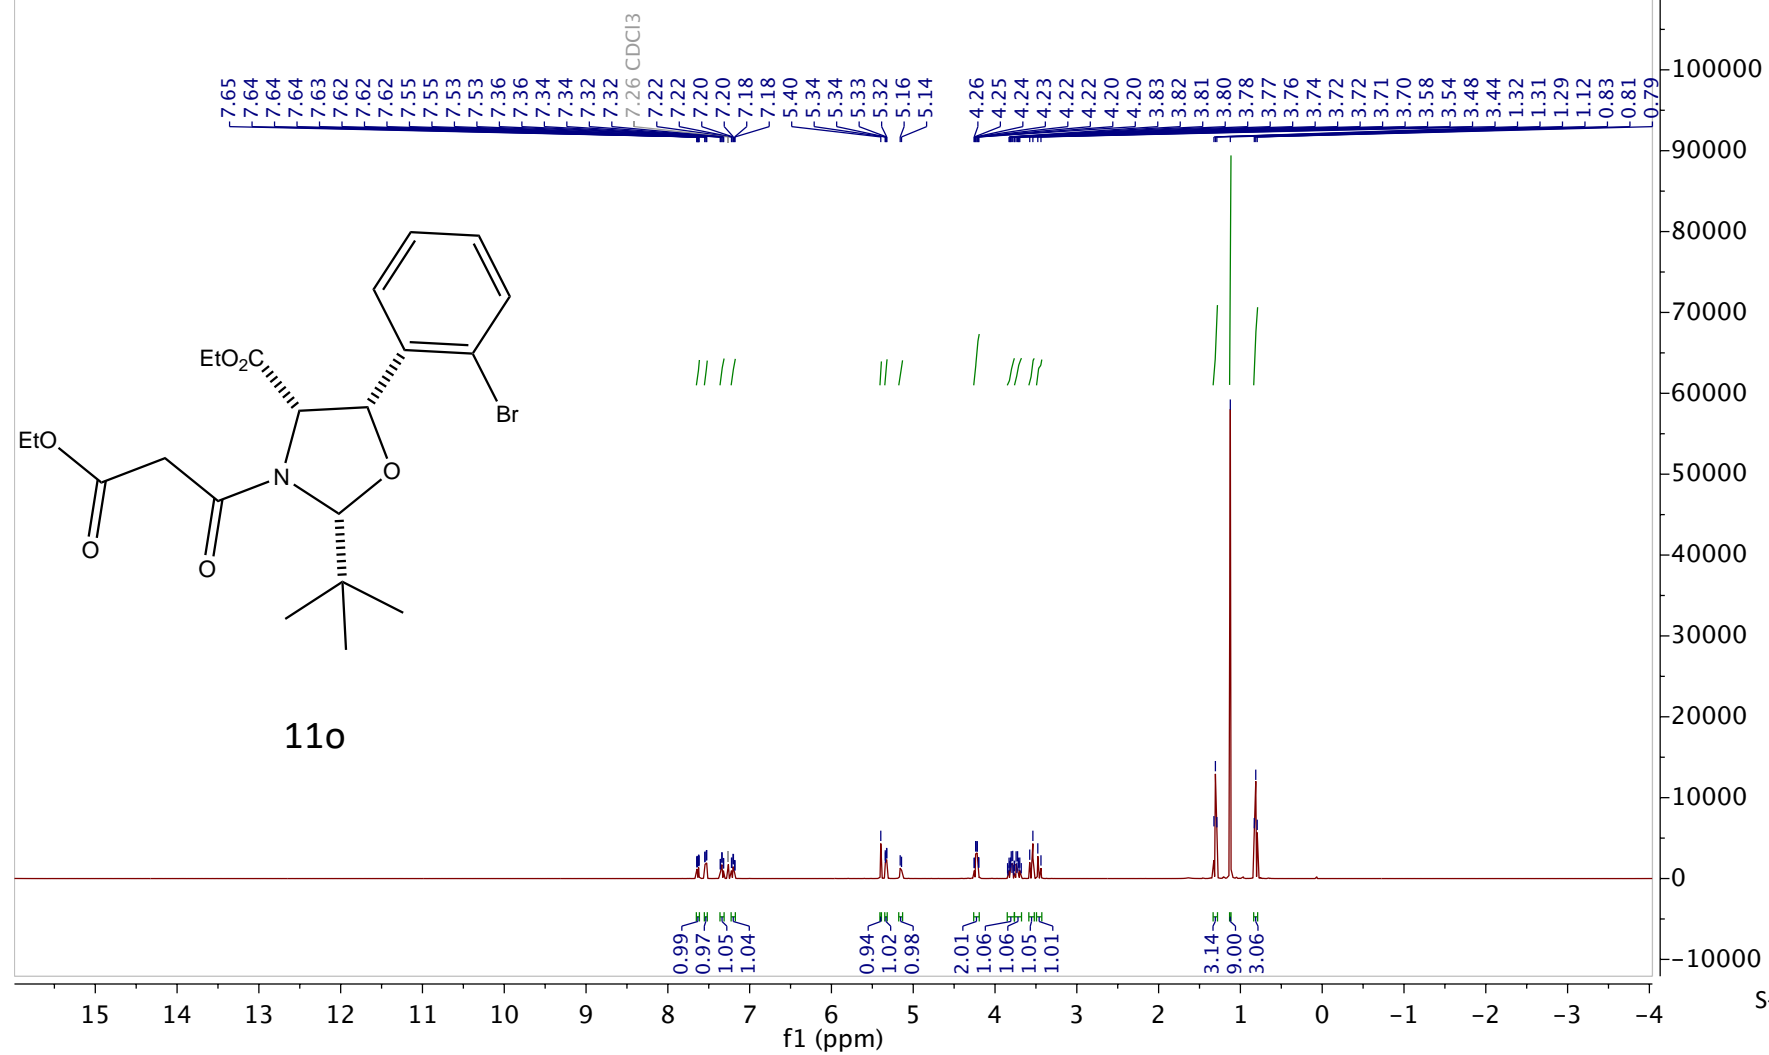

Feb19-2021-28-LS957(P) C2-C12.4.fid  
Instrument AVH400  
Group MGM  
Chemist Liban Saney  
Project Account Code DM7300  
c13acq\_512.crl CDCl3 {C:\NMR} mgmgrp 28

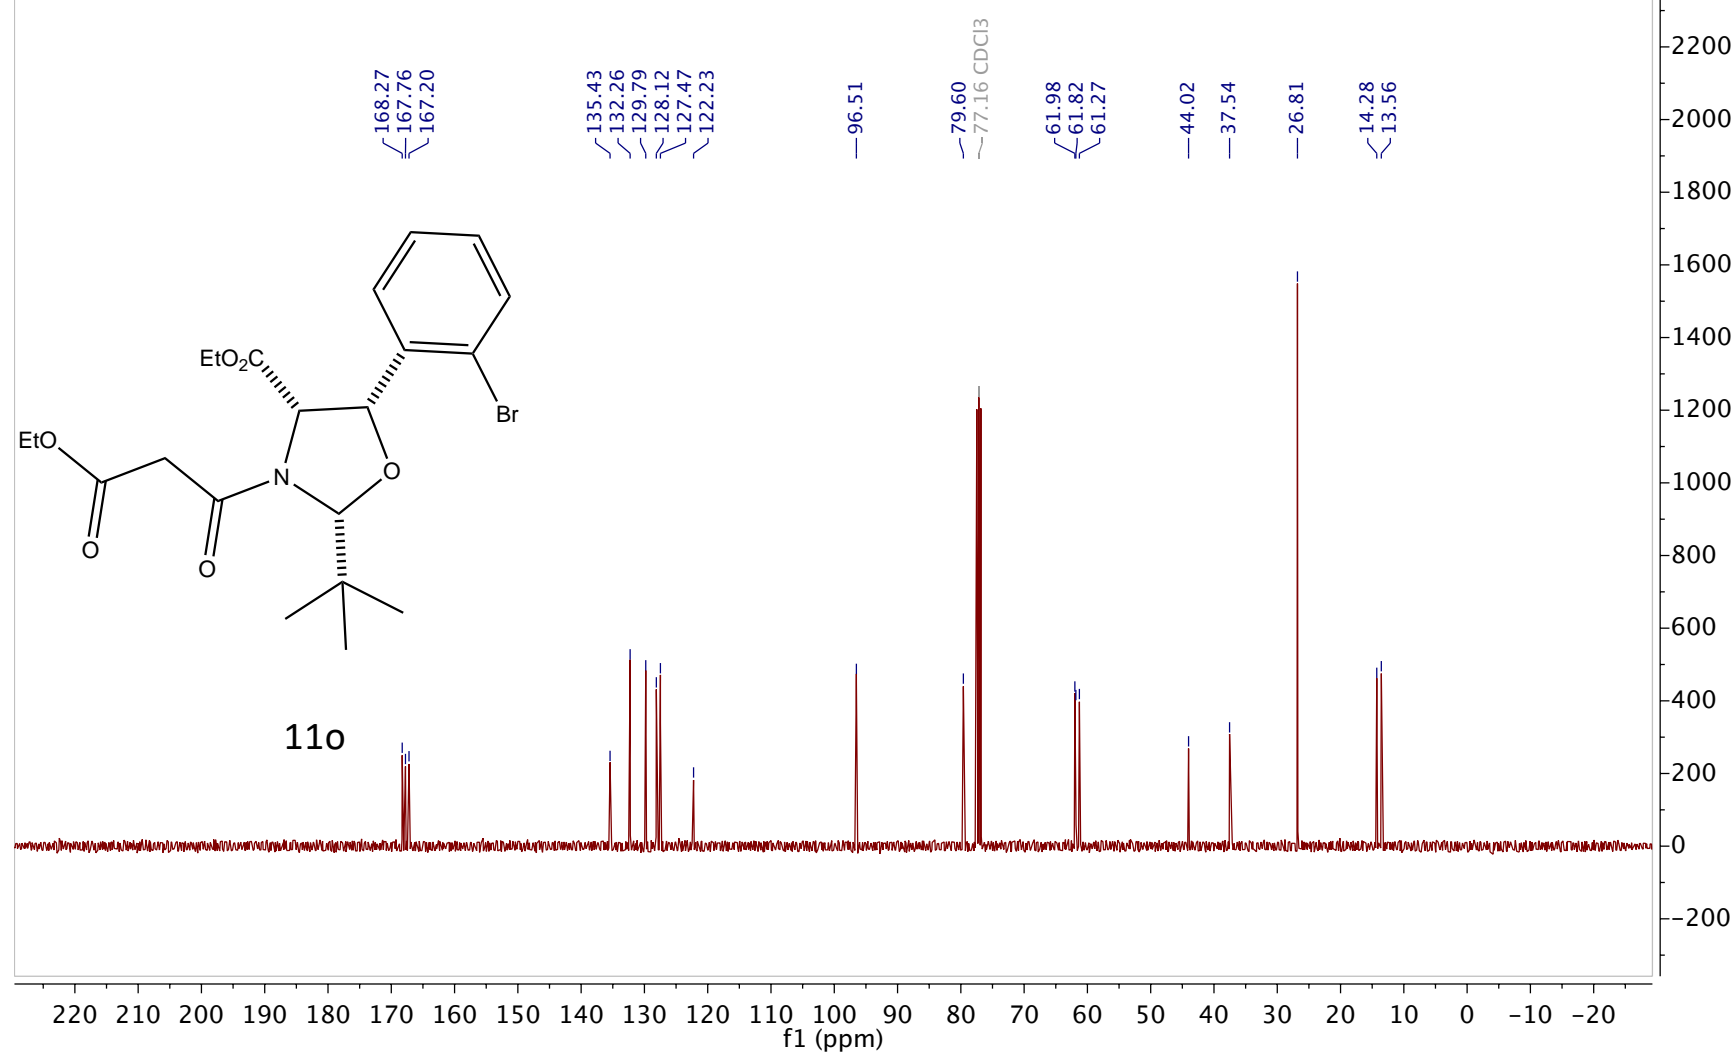

Feb19-2021-30-LS959(P) E12-H3.1.fid  
Instrument AVH400  
Group MGM  
Chemist Liban Saney  
Project Account Code DM7300  
h1acq.crl CDCl3 {C:\NMR} mgmgrp 30

<sup>1</sup>H NMR (400 MHz, CDCl<sub>3</sub>)

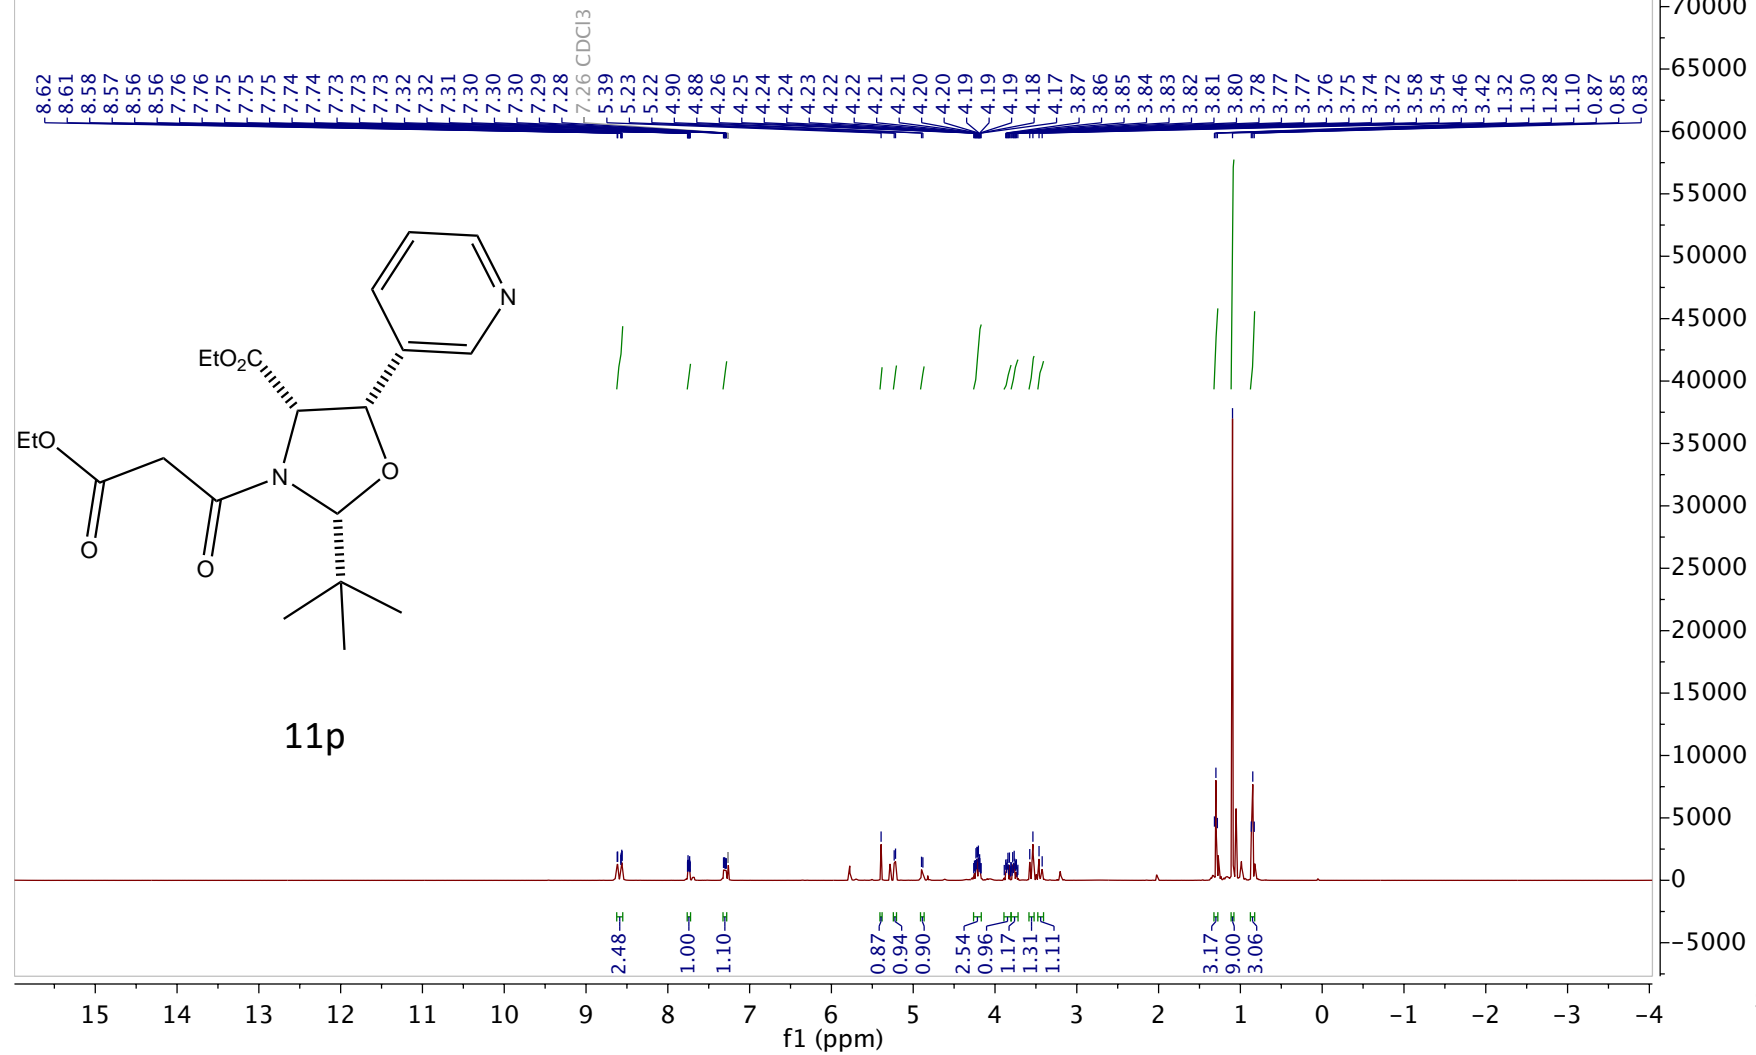



Feb19-2021-30-LS959(P) E12-H3.4.fid  
Instrument AVH400  
Group MGM  
Chemist Liban Saney  
Project Account Code DM7300  
c13acq\_512.crl CDCl3 {C:\NMR} mgmgrp 30

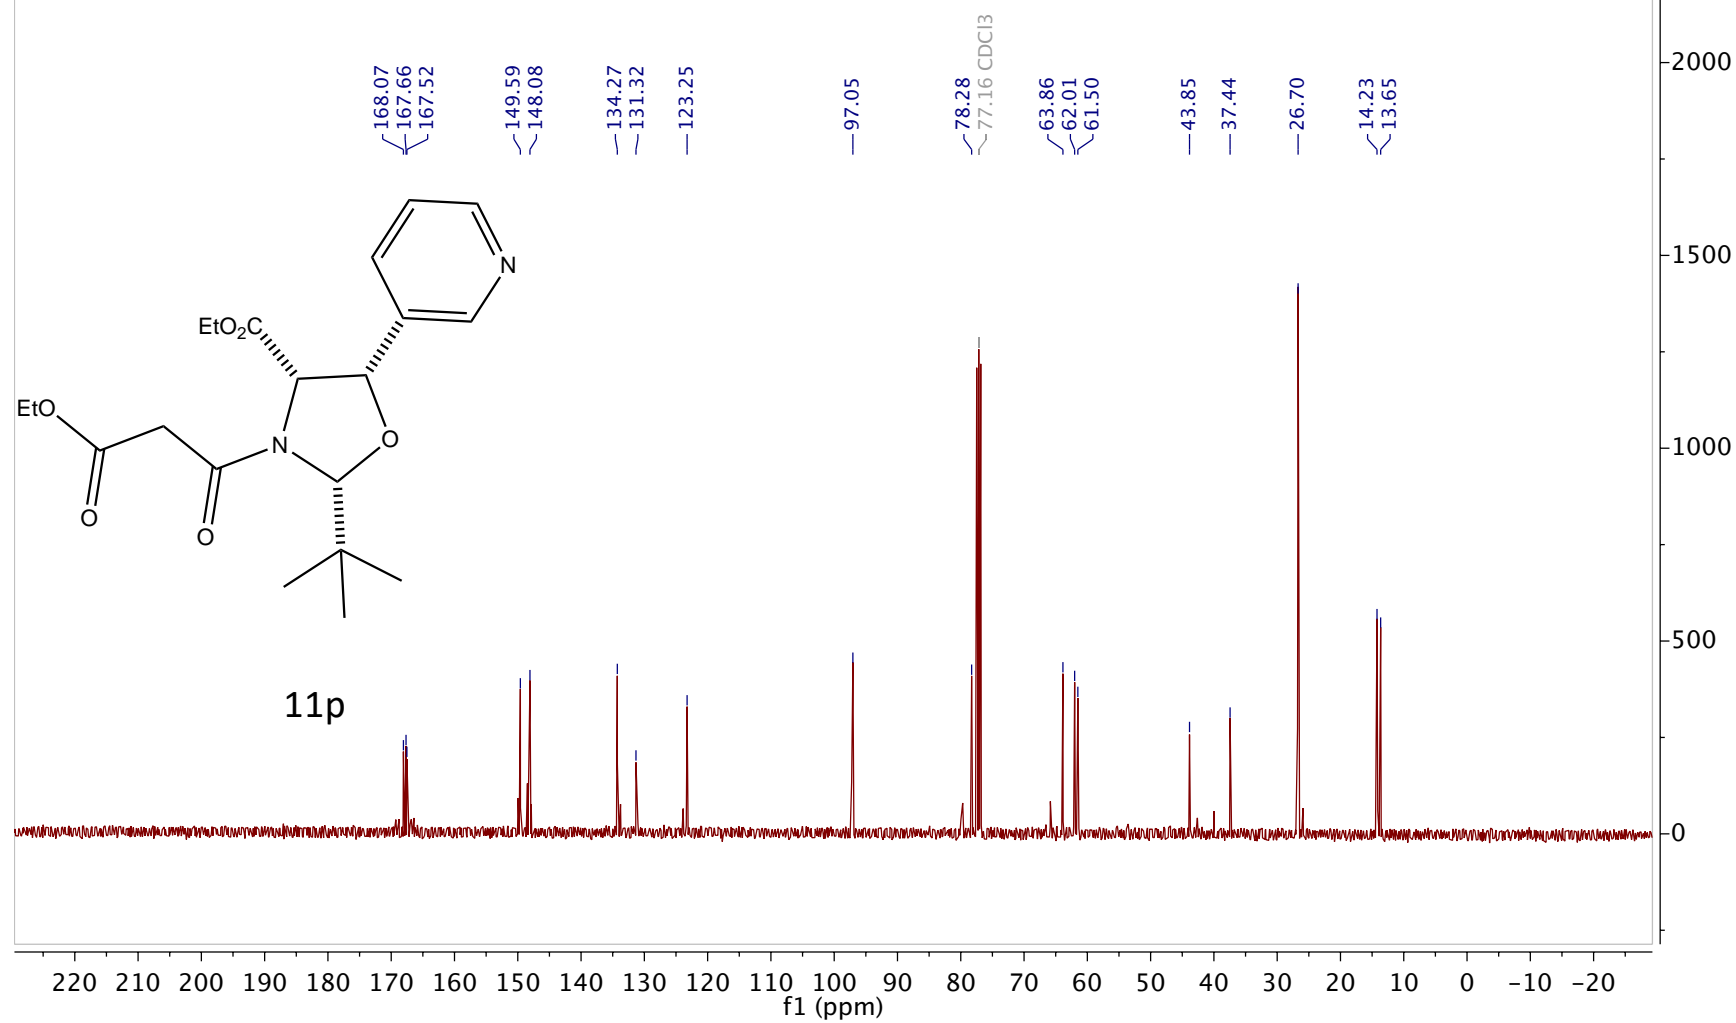

May21-2019-58-LS421(C).1.fid  
Instrument AVF400  
Chemist Liban Saney  
Group MGM  
Project Account Code DM7300  
h1acq.crl CDCl3 {C:\NMR} mgmgrp 58

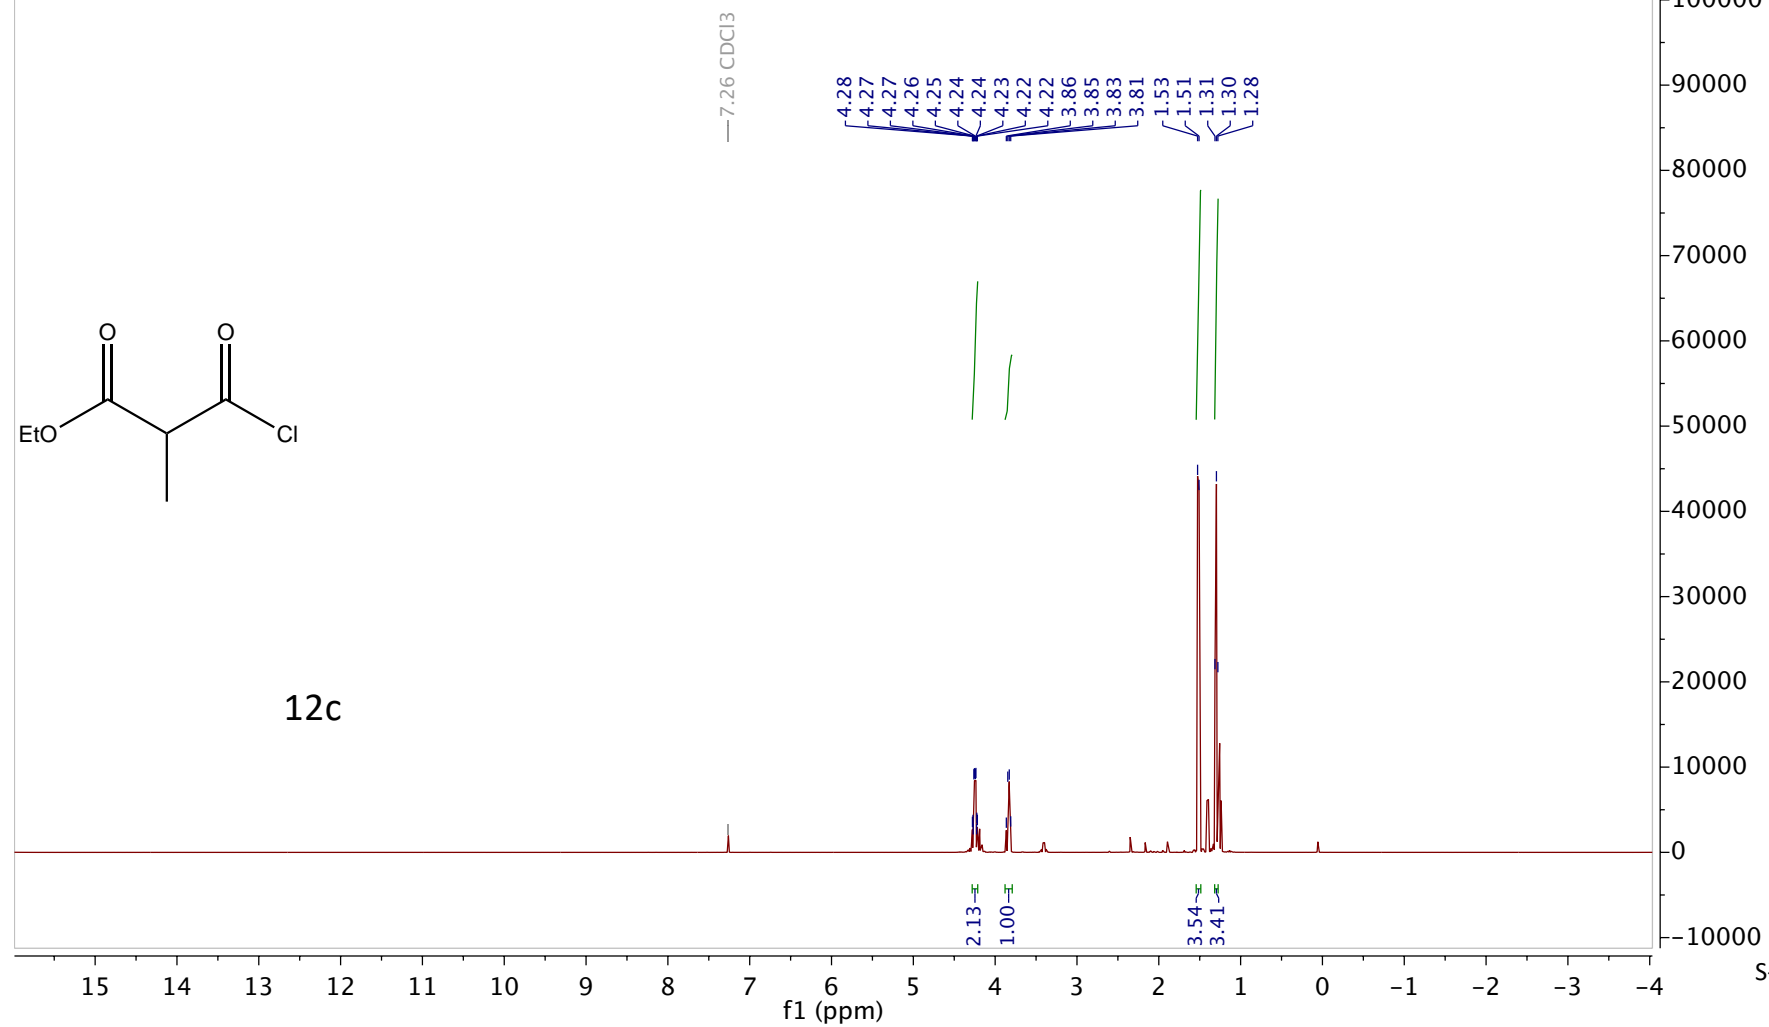

May21-2019-58-LS421(C).4.fid  
Instrument AVF400  
Chemist Liban Saney  
Group MGM  
Project Account Code DM7300  
c13acq\_512.crl CDCl3 {C:\NMR} mgmgrp 58

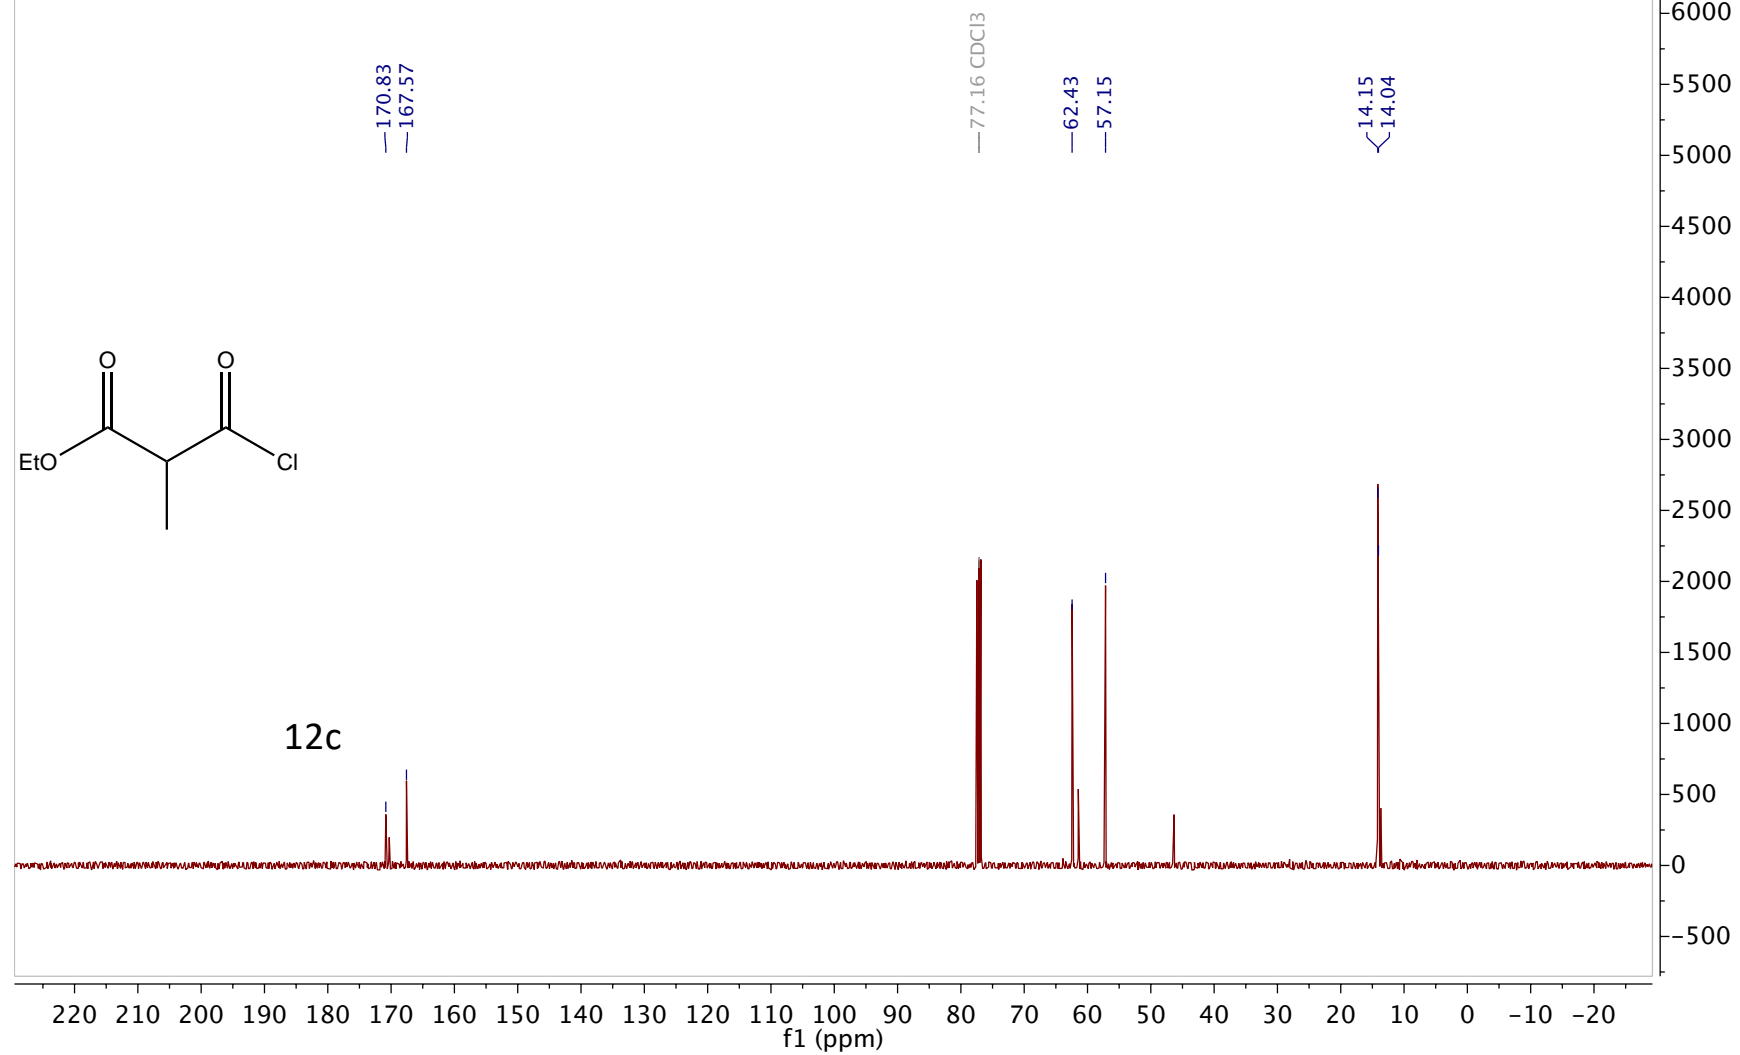

Jul07-2019-60-LS448(C).1.fid  
Instrument AVF400  
Chemist Liban Saney  
Group MGM  
Project Account Code DM7300  
h1acq.crl CDCl3 {C:\NMR} mgmgrp 60

<sup>1</sup>H NMR (400 MHz, CDCl<sub>3</sub>)

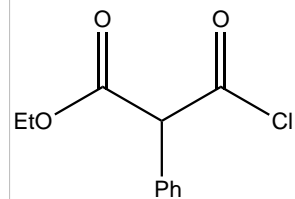

12d

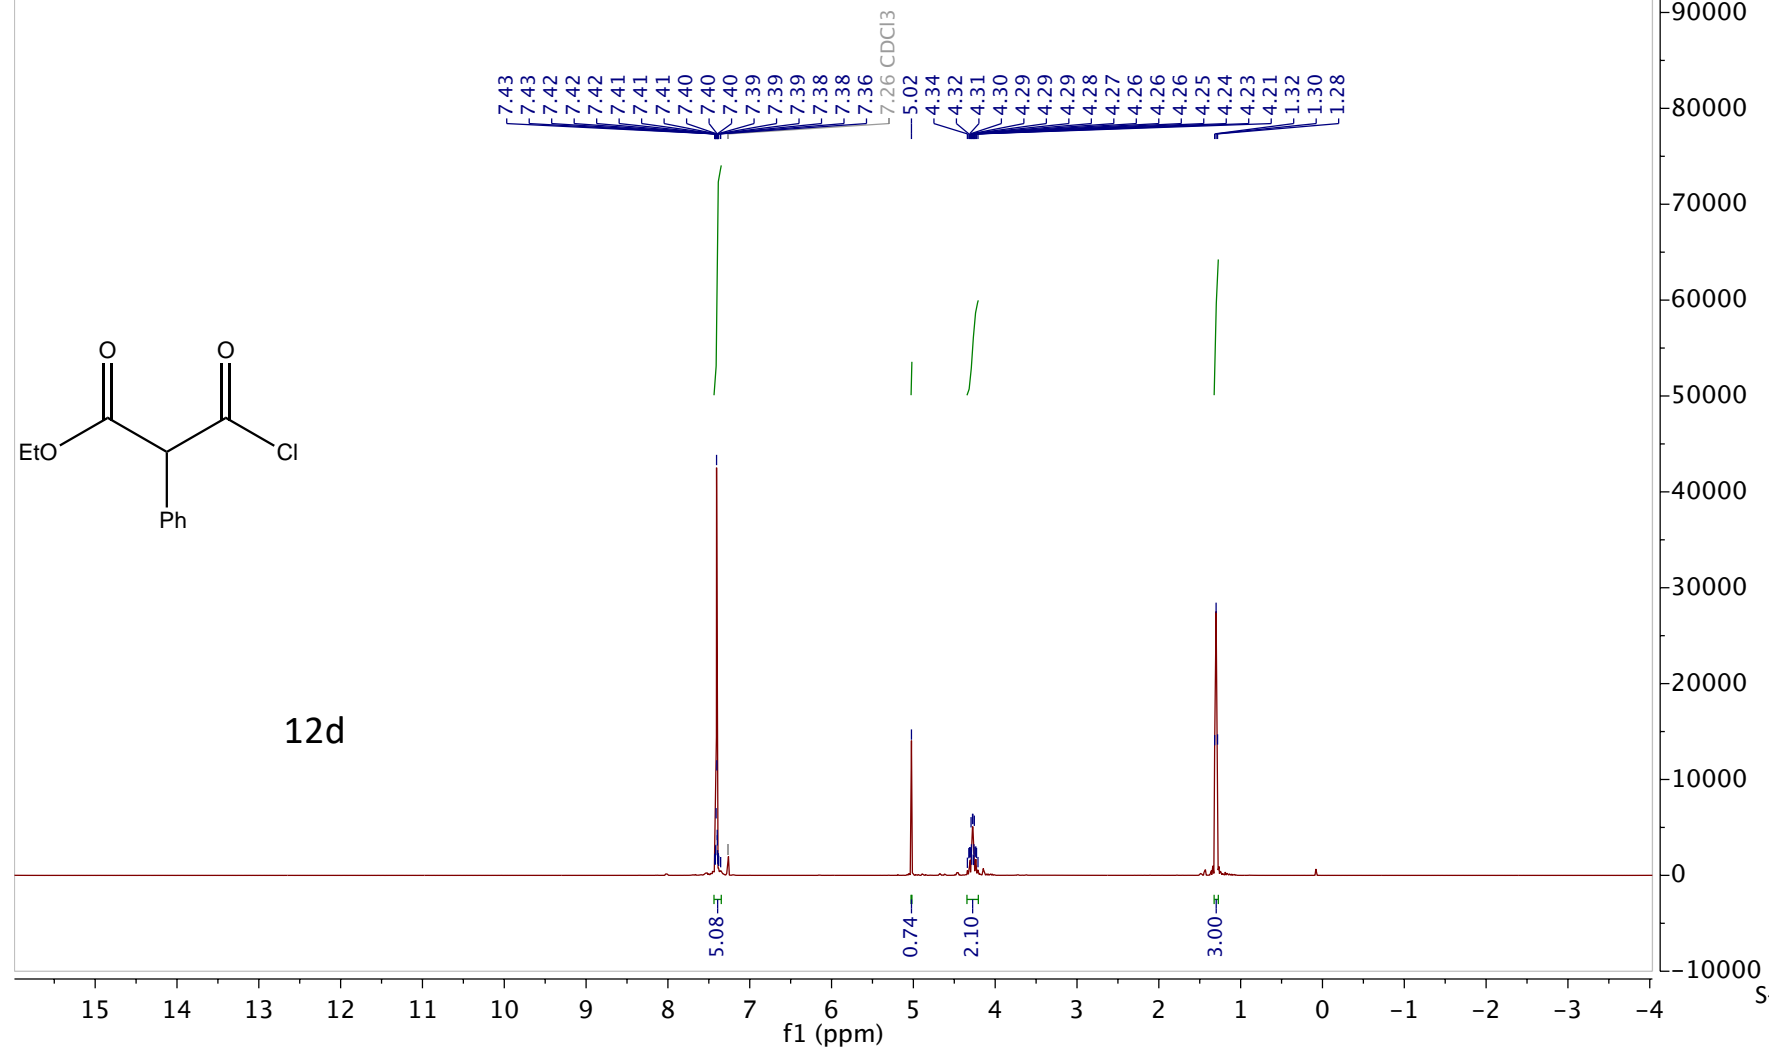

Jul07-2019-60-LS448(C).4.fid  
Instrument AVF400  
Chemist Liban Saney  
Group MGM  
Project Account Code DM7300  
c13acq\_512.crl CDCl3 {C:\NMR} mgmgrp 60

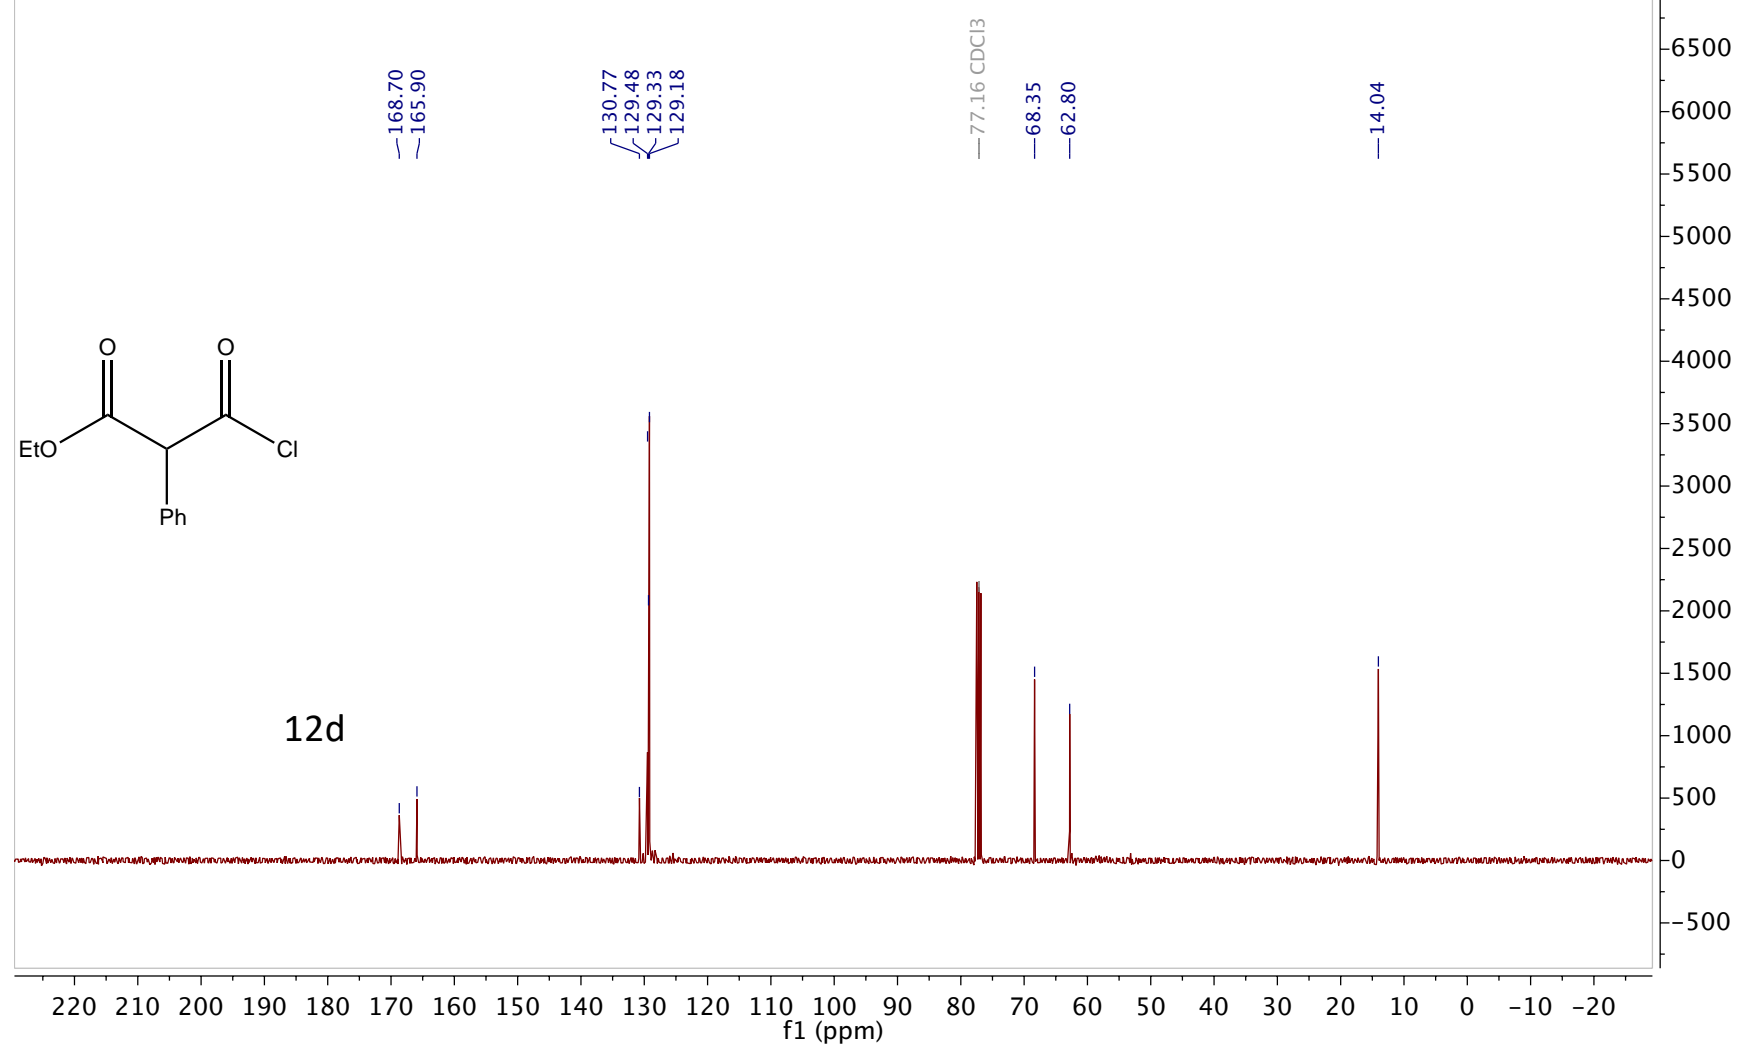

May30-2019-57-LS426(P) A11-B6.1.fid  
Instrument AVF400  
Chemist Liban Saney  
Group MGM  
Project Account Code DM7300  
h1acq.crl CDCl3 {C:\NMR} mgmgrp 57

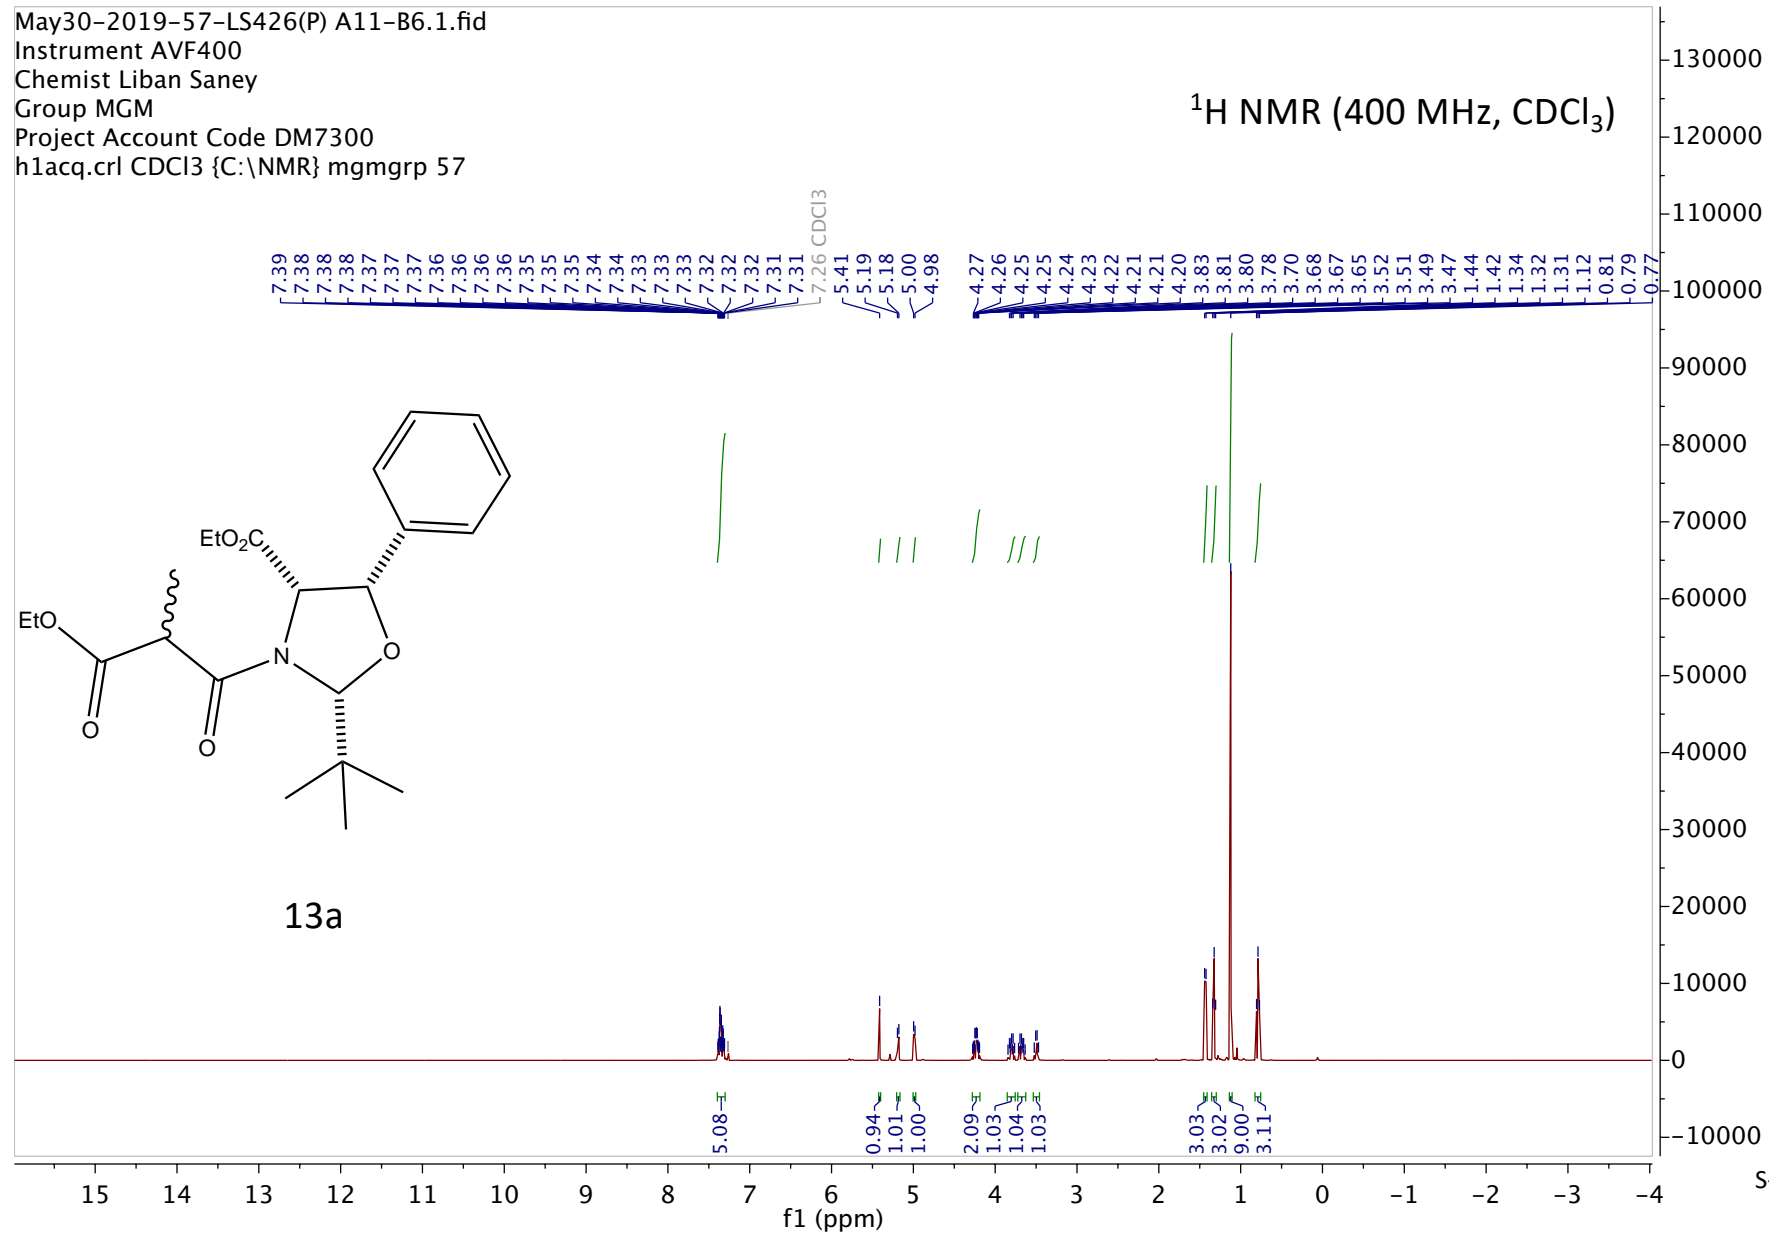

May30-2019-57-LS426(P) A11-B6.4.fid  
Instrument AVF400  
Chemist Liban Saney  
Group MGM  
Project Account Code DM7300  
c13acq\_512.crl CDCl3 {C:\NMR} mgmgrp 57

<sup>13</sup>C NMR (101 MHz, CDCl<sub>3</sub>)

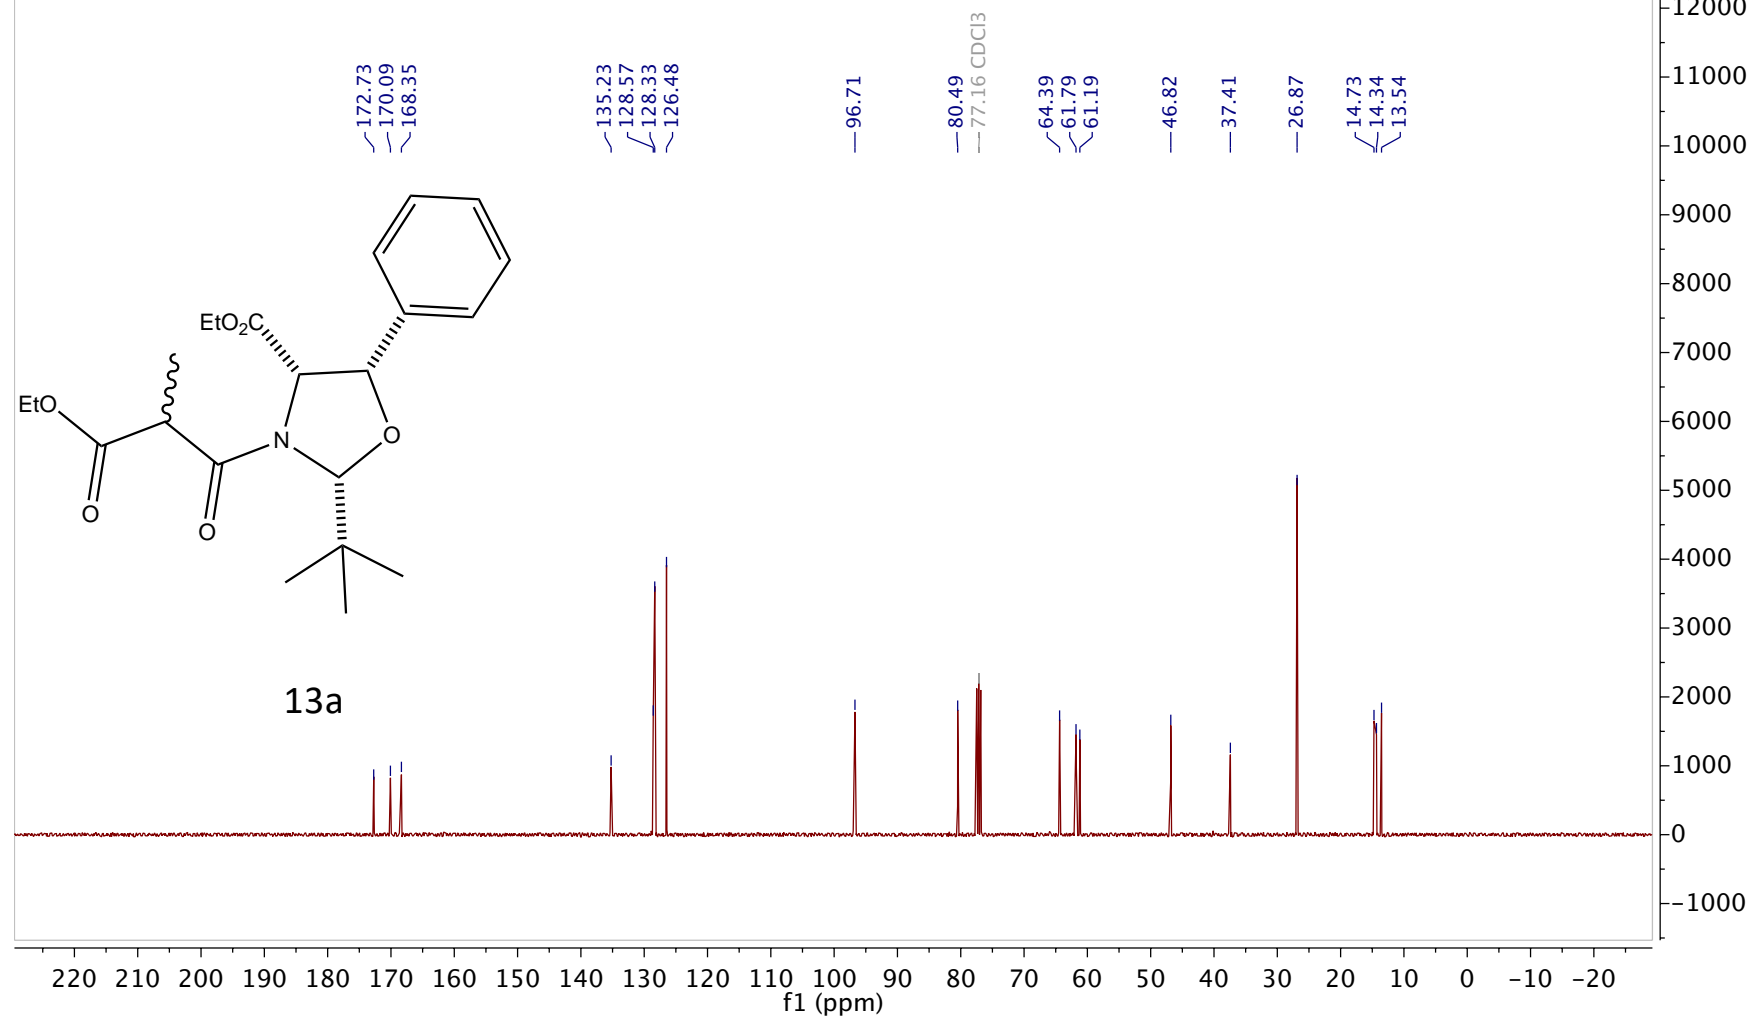

Jul09-2019-59-LS449(P) A8-B2.1.fid  
Instrument AVF400  
Chemist Liban Saney  
Group MGM  
Project Account Code DM7300  
h1acq.crl CDCl3 {C:\NMR} mgmgrp 59

<sup>1</sup>H NMR (400 MHz, CDCl<sub>3</sub>)

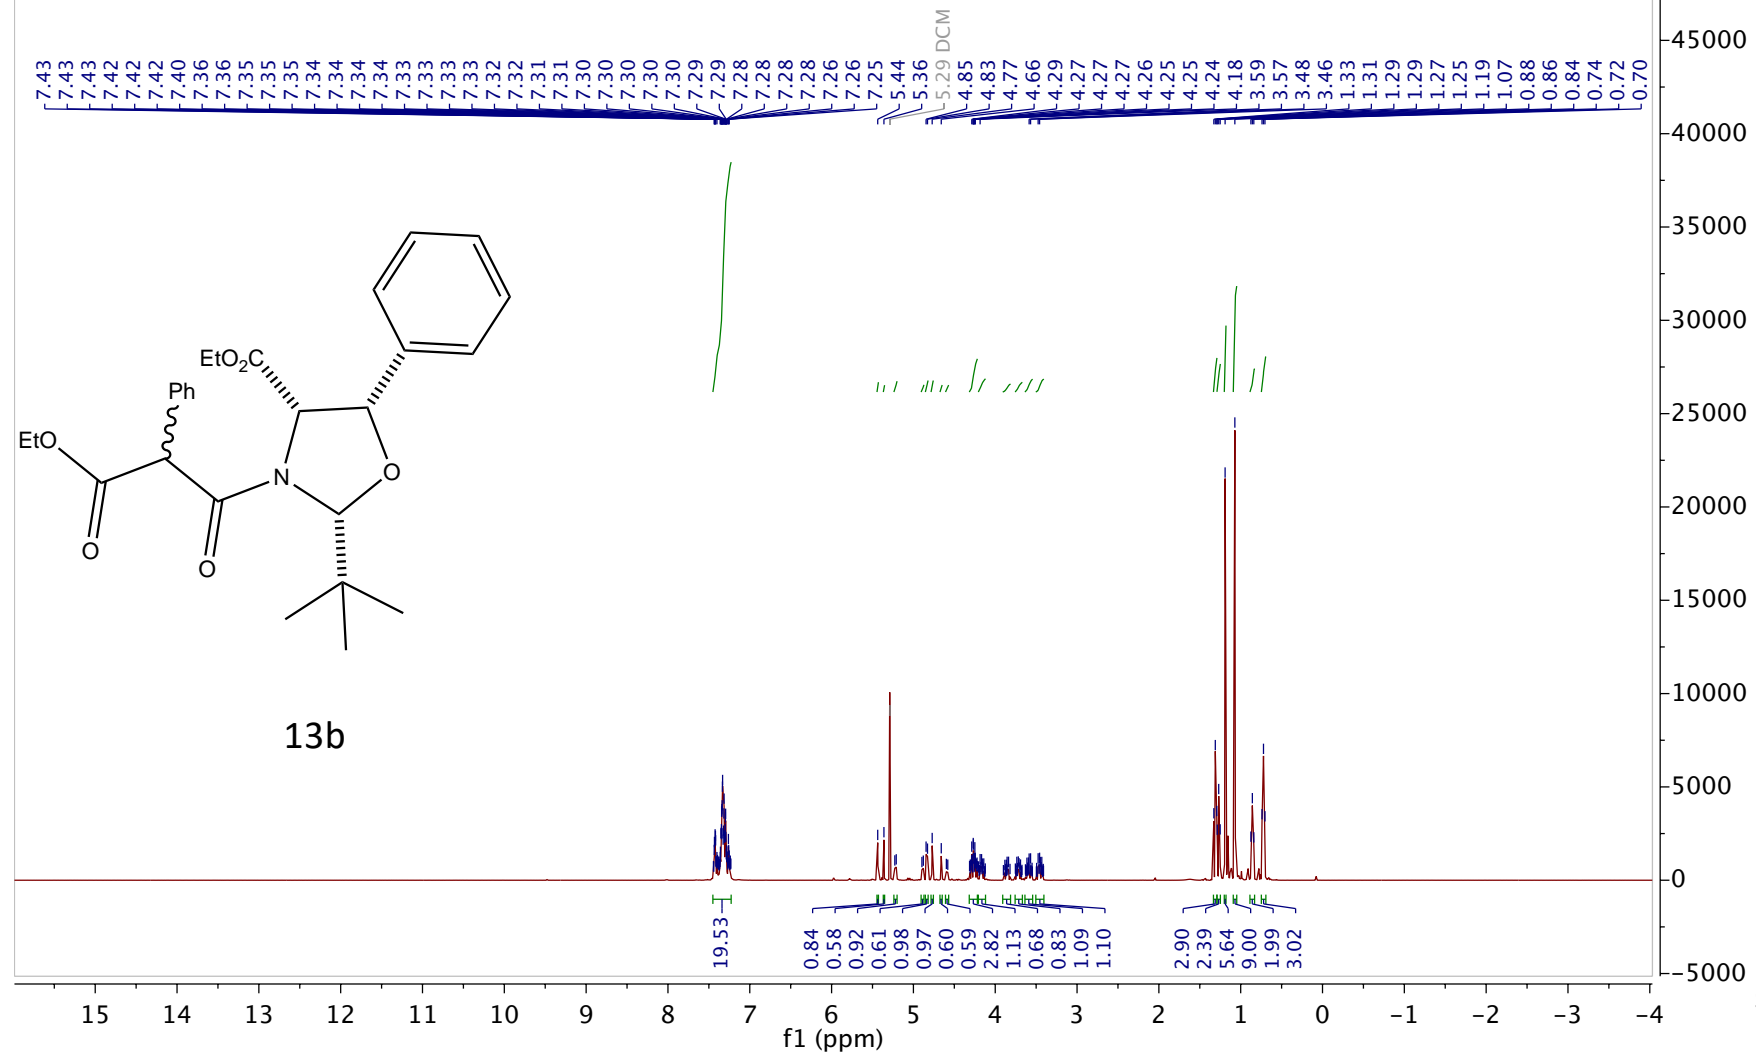



Jul09-2019-59-LS449(P) A8-B2.4.fid  
Instrument AVF400  
Chemist Liban Saney  
Group MGM  
Project Account Code DM7300  
c13acq\_512.crl CDCl3 {C:\NMR} mgmgrp 59

$^{13}\text{C}$  NMR (101 MHz,  $\text{CDCl}_3$ )

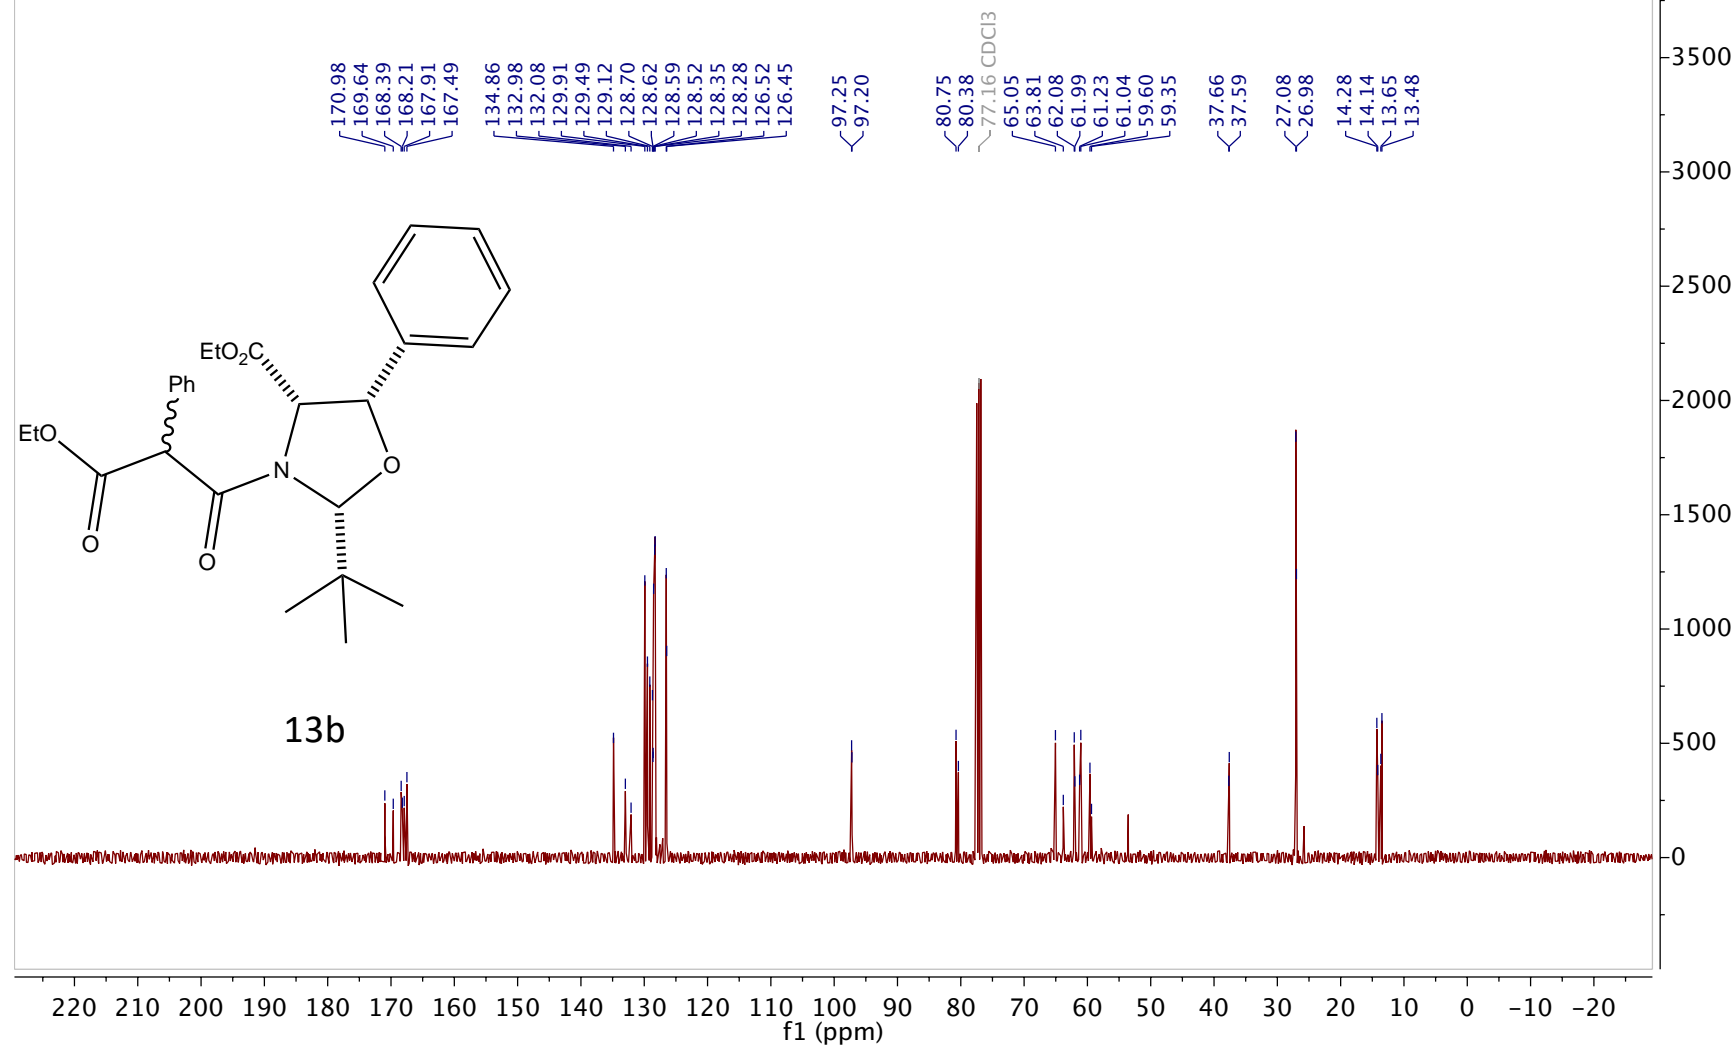

Aug30-2019-58-LS513(C).1.fid  
Instrument AVF400  
Chemist Liban Saney  
Group MGM  
Project Account Code DM7300  
h1acq.crl CDCl3 {C:\NMR} mgmgrp 58

<sup>1</sup>H NMR (400 MHz, CDCl<sub>3</sub>)

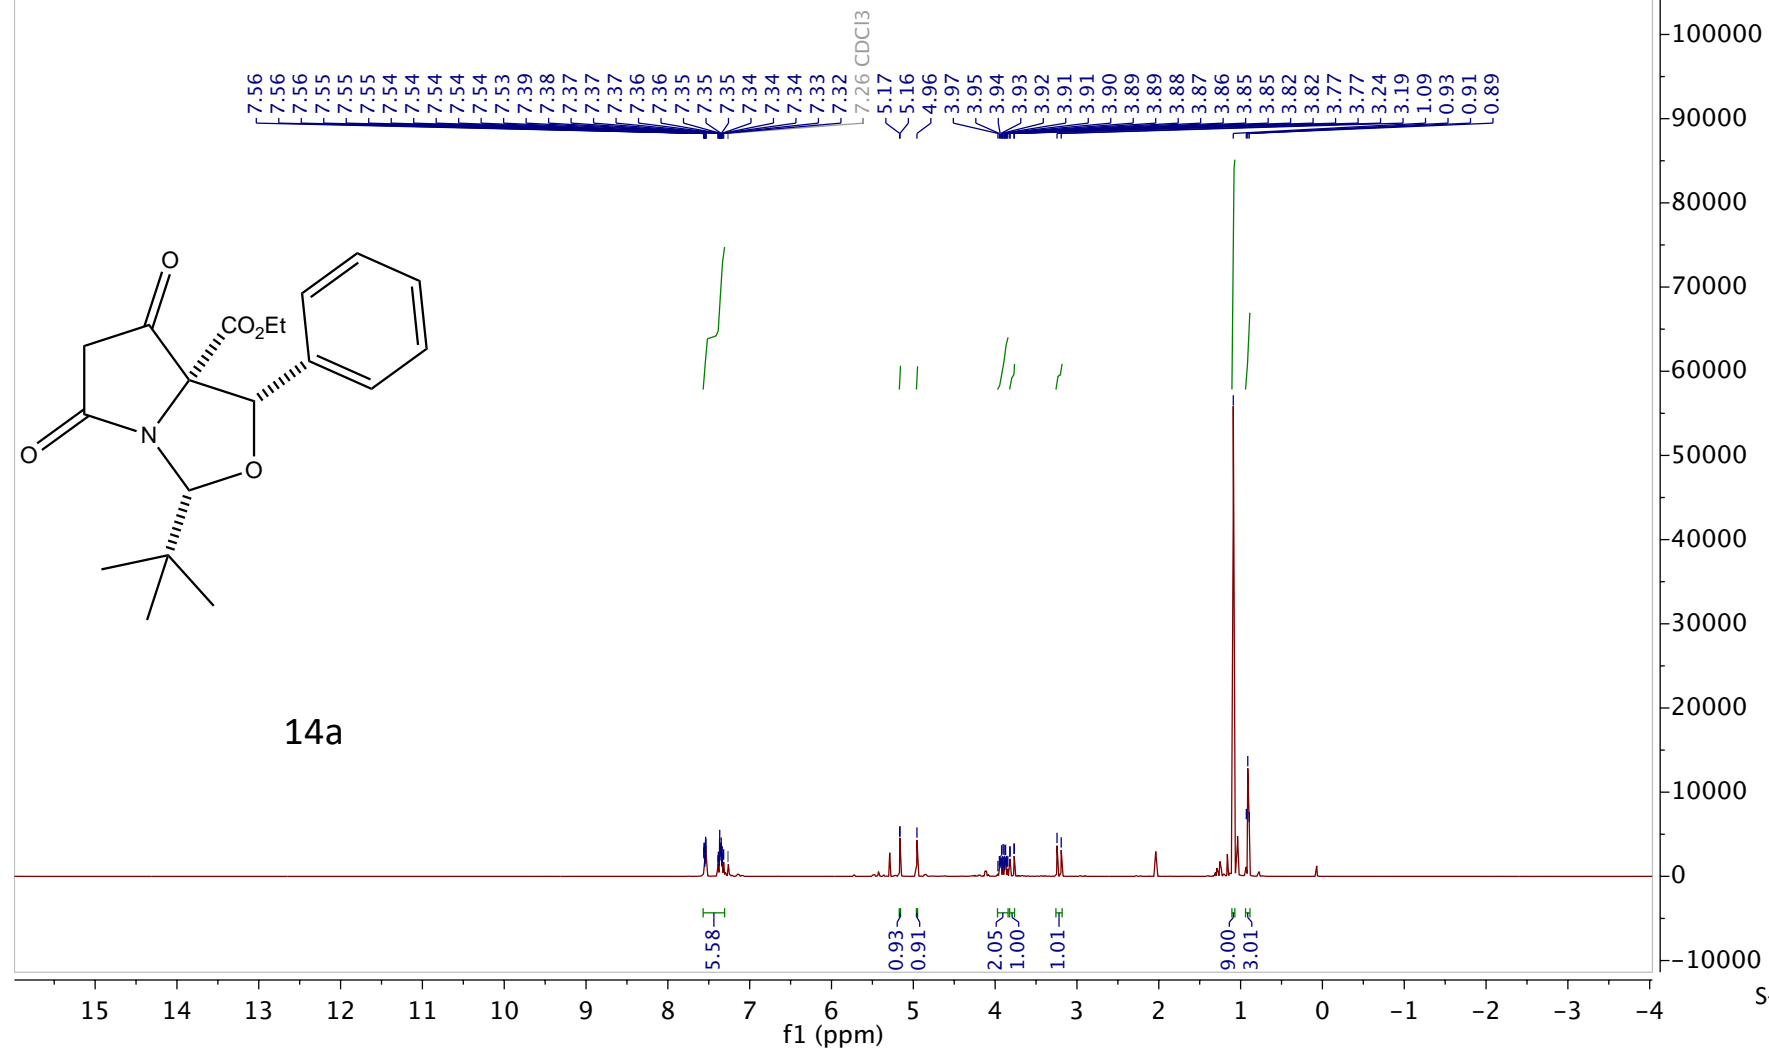

Aug30-2019-58-LS513(C).4.fid  
Instrument AVF400  
Chemist Liban Saney  
Group MGM  
Project Account Code DM7300  
c13acq\_512.crl CDCl3 {C:\NMR} mgmgrp 58

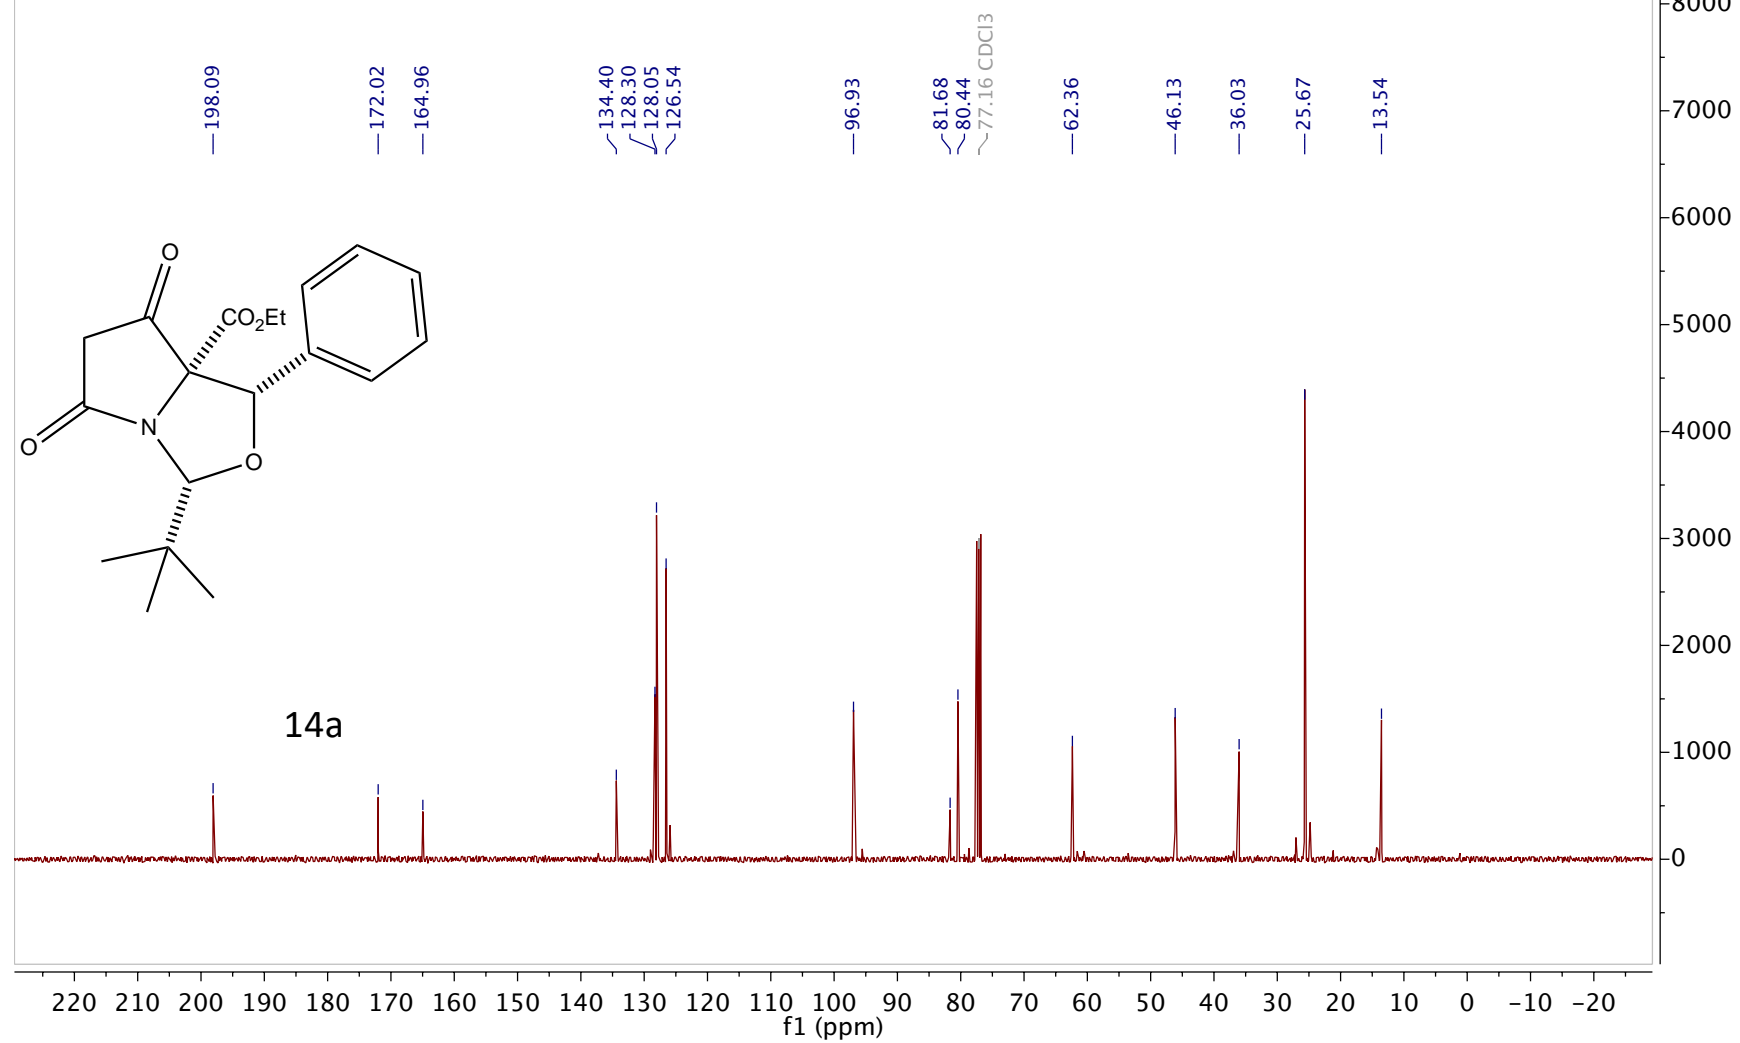

Aug30-2019-59-LS514(C).1.fid  
Instrument AVF400  
Chemist Liban Saney  
Group MGM  
Project Account Code DM7300  
h1acq.crl CDCl3 {C:\NMR} mgmgrp 59

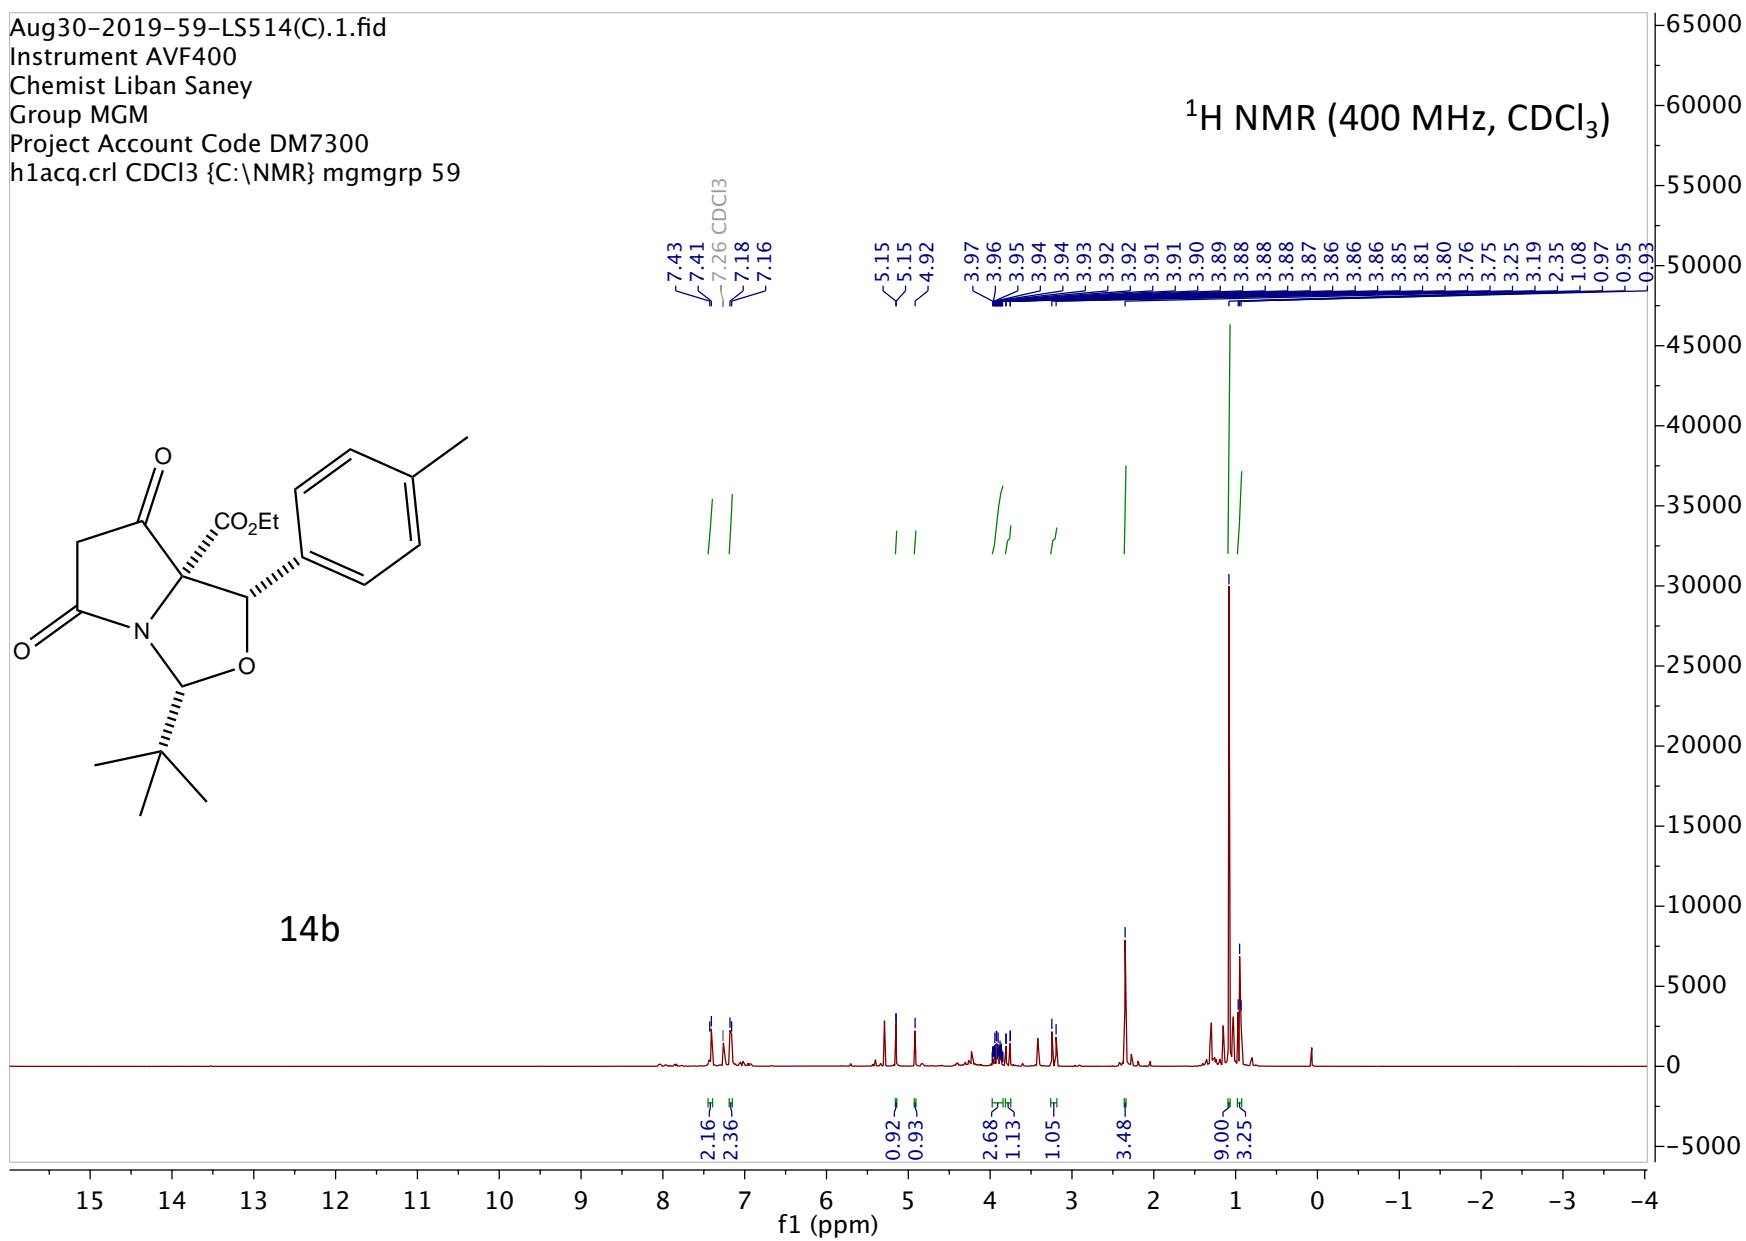

Aug30-2019-59-LS514(C).4.fid  
Instrument AVF400  
Chemist Liban Saney  
Group MGM  
Project Account Code DM7300  
c13acq\_512.crl CDCl3 {C:\NMR} mgmgrp 59

$^{13}\text{C}$  NMR (101 MHz,  $\text{CDCl}_3$ )

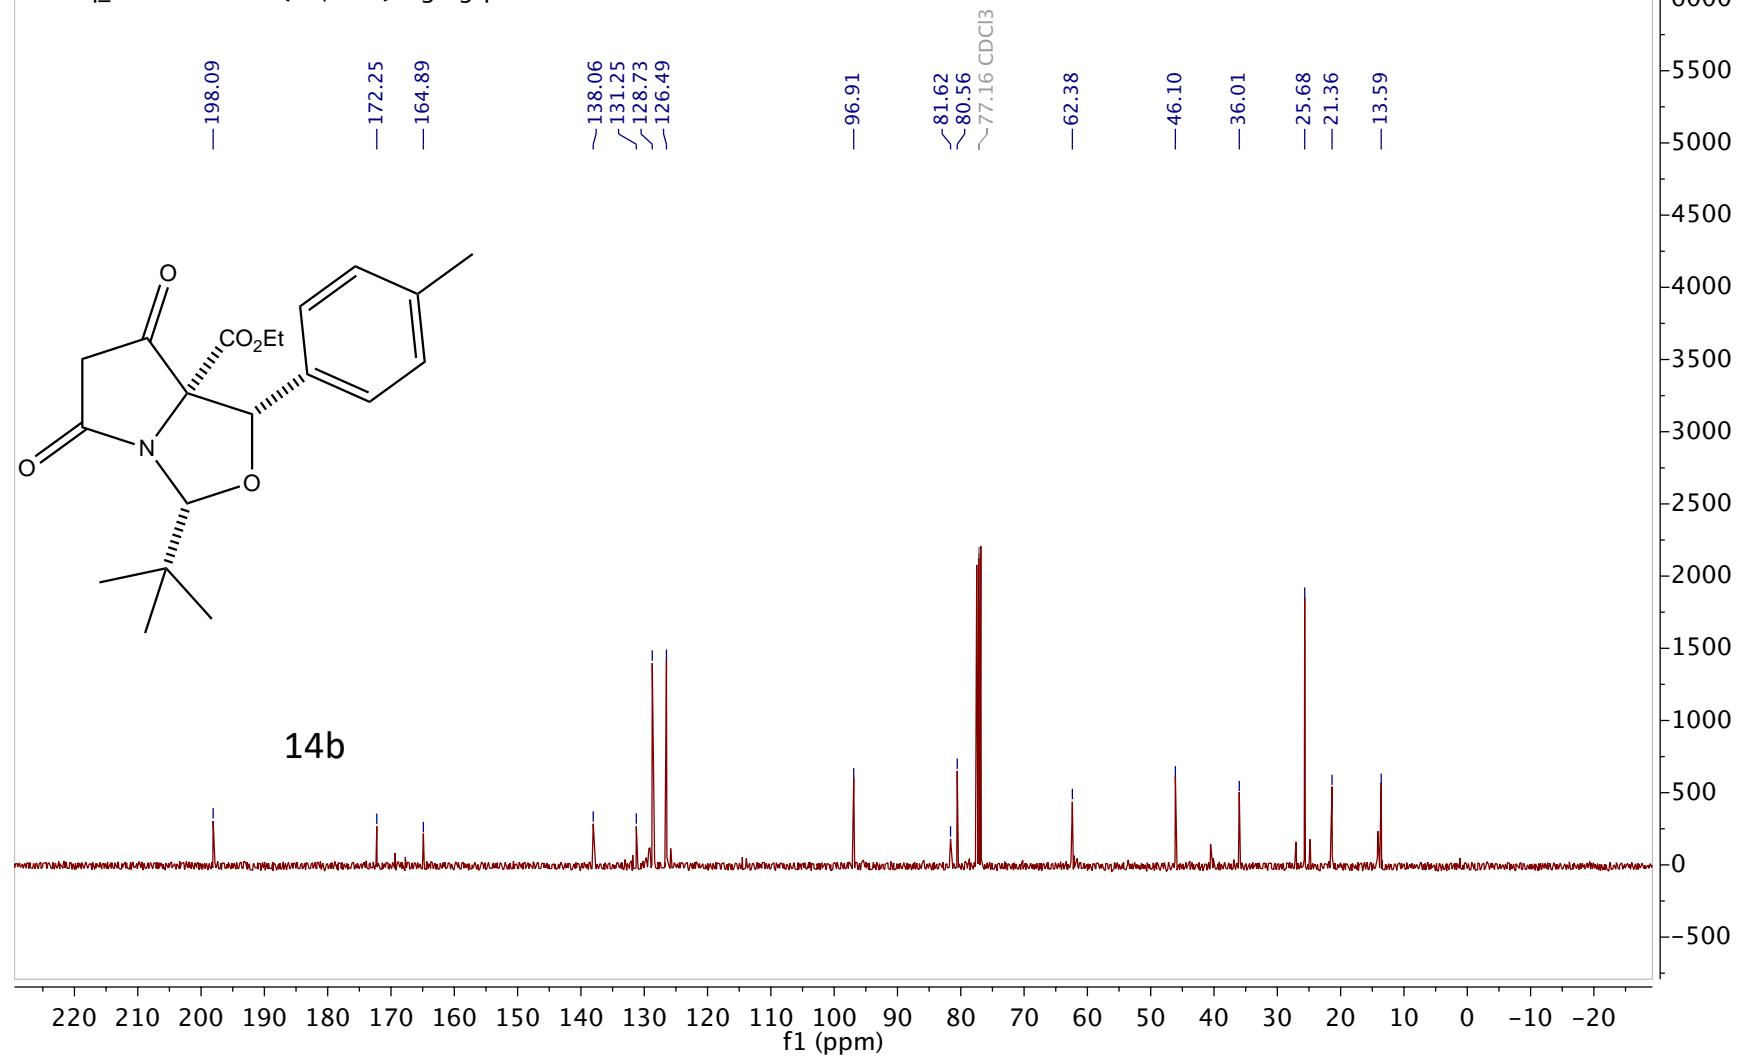

Sep06-2019-60-LS523(C).1.fid  
Instrument AVF400  
Chemist Liban Saney  
Group MGM  
Project Account Code DM7300  
h1acq.crl CDCl3 {C:\NMR} mgmgrp 60

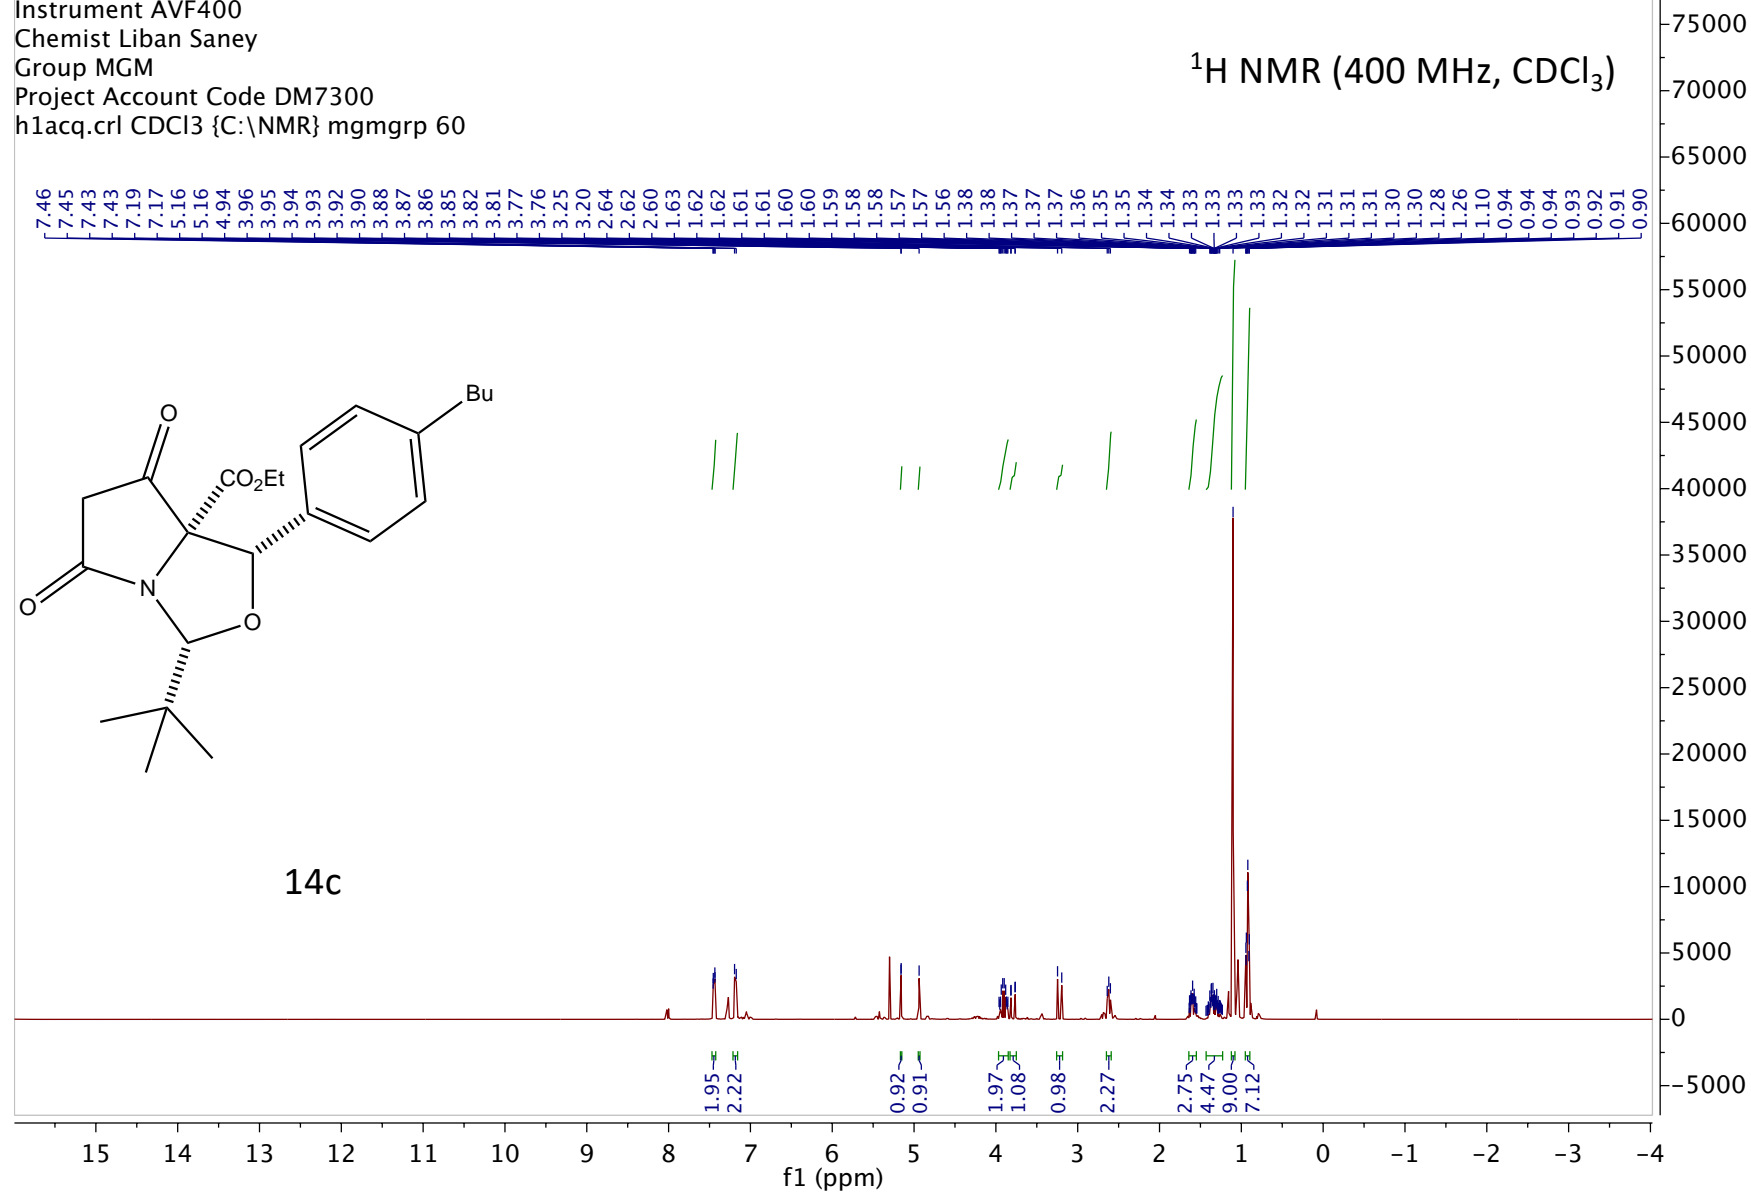

Sep06-2019-60-LS523(C).4.fid

Instrument AVF400

Chemist Liban Saney

Group MGM

Project Account Code DM7300

c13acq\_512.crl CDCl3 {C:\NMR} mgmgrp 60

<sup>13</sup>C NMR (101 MHz, CDCl<sub>3</sub>)

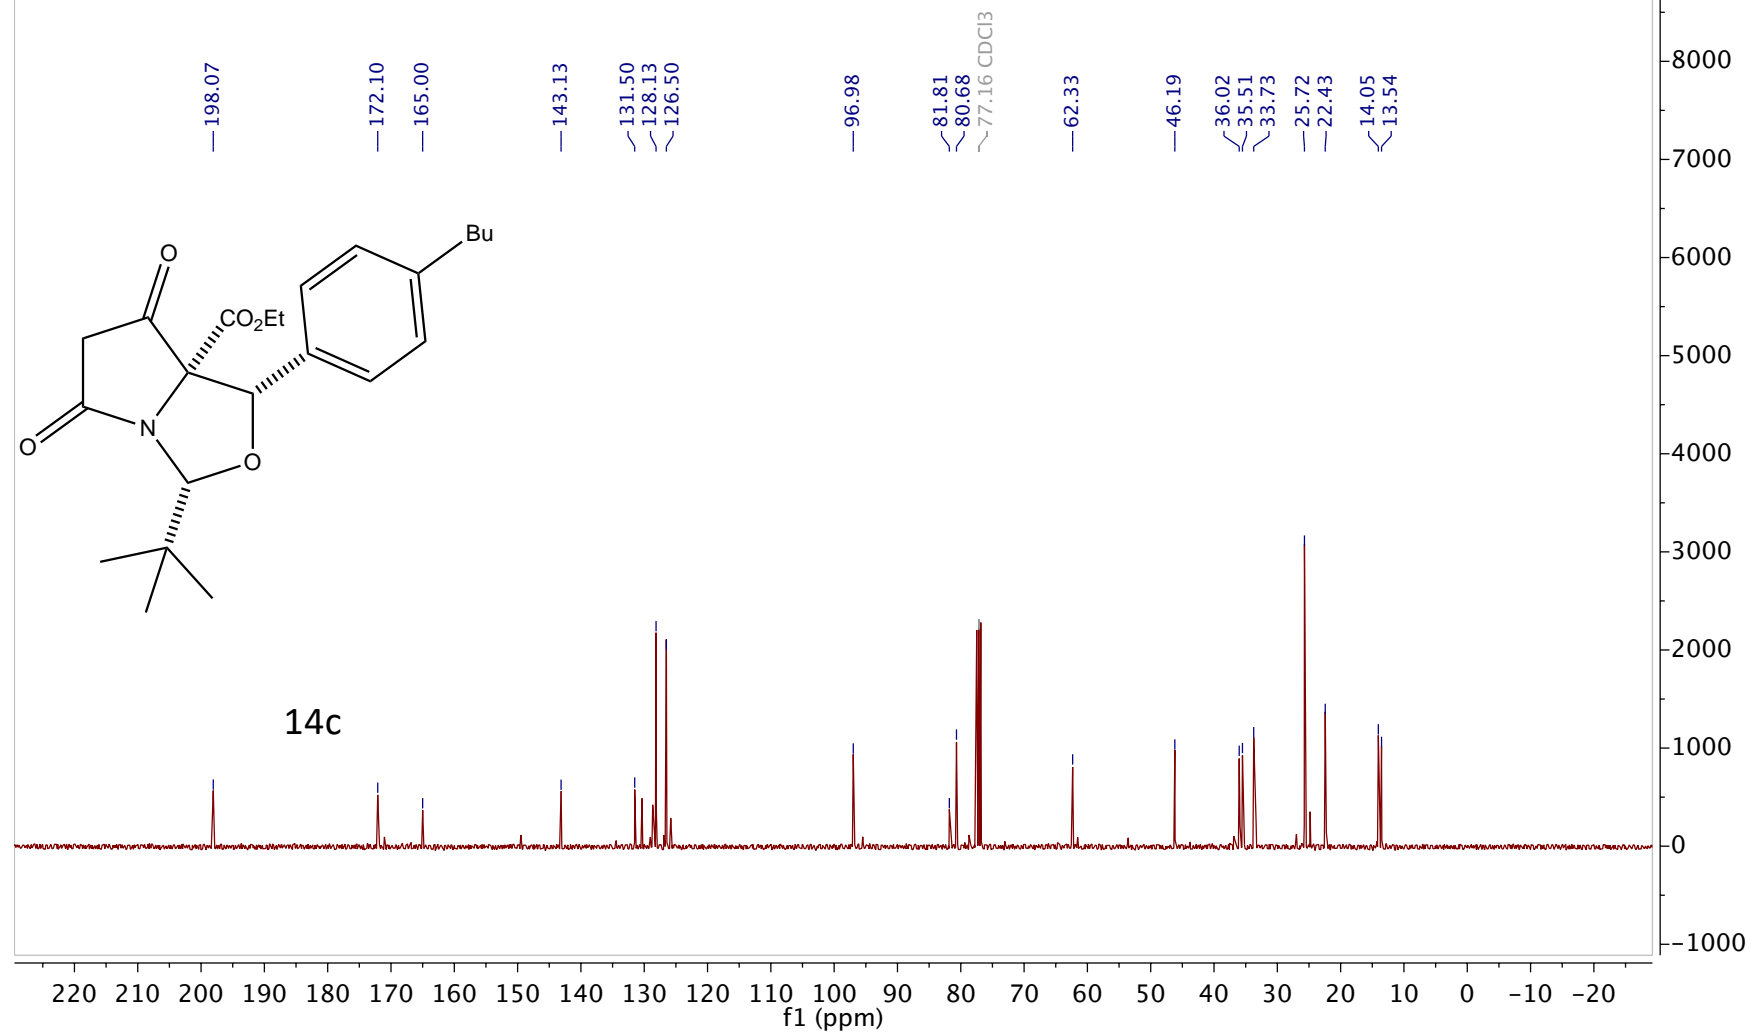

Sep02-2019-60-LS518(C).1.fid  
Instrument AVF400  
Chemist Liban Saney  
Group MGM  
Project Account Code DM7300  
h1acq.crl CDCl3 {C:\NMR} mgmgrp 60

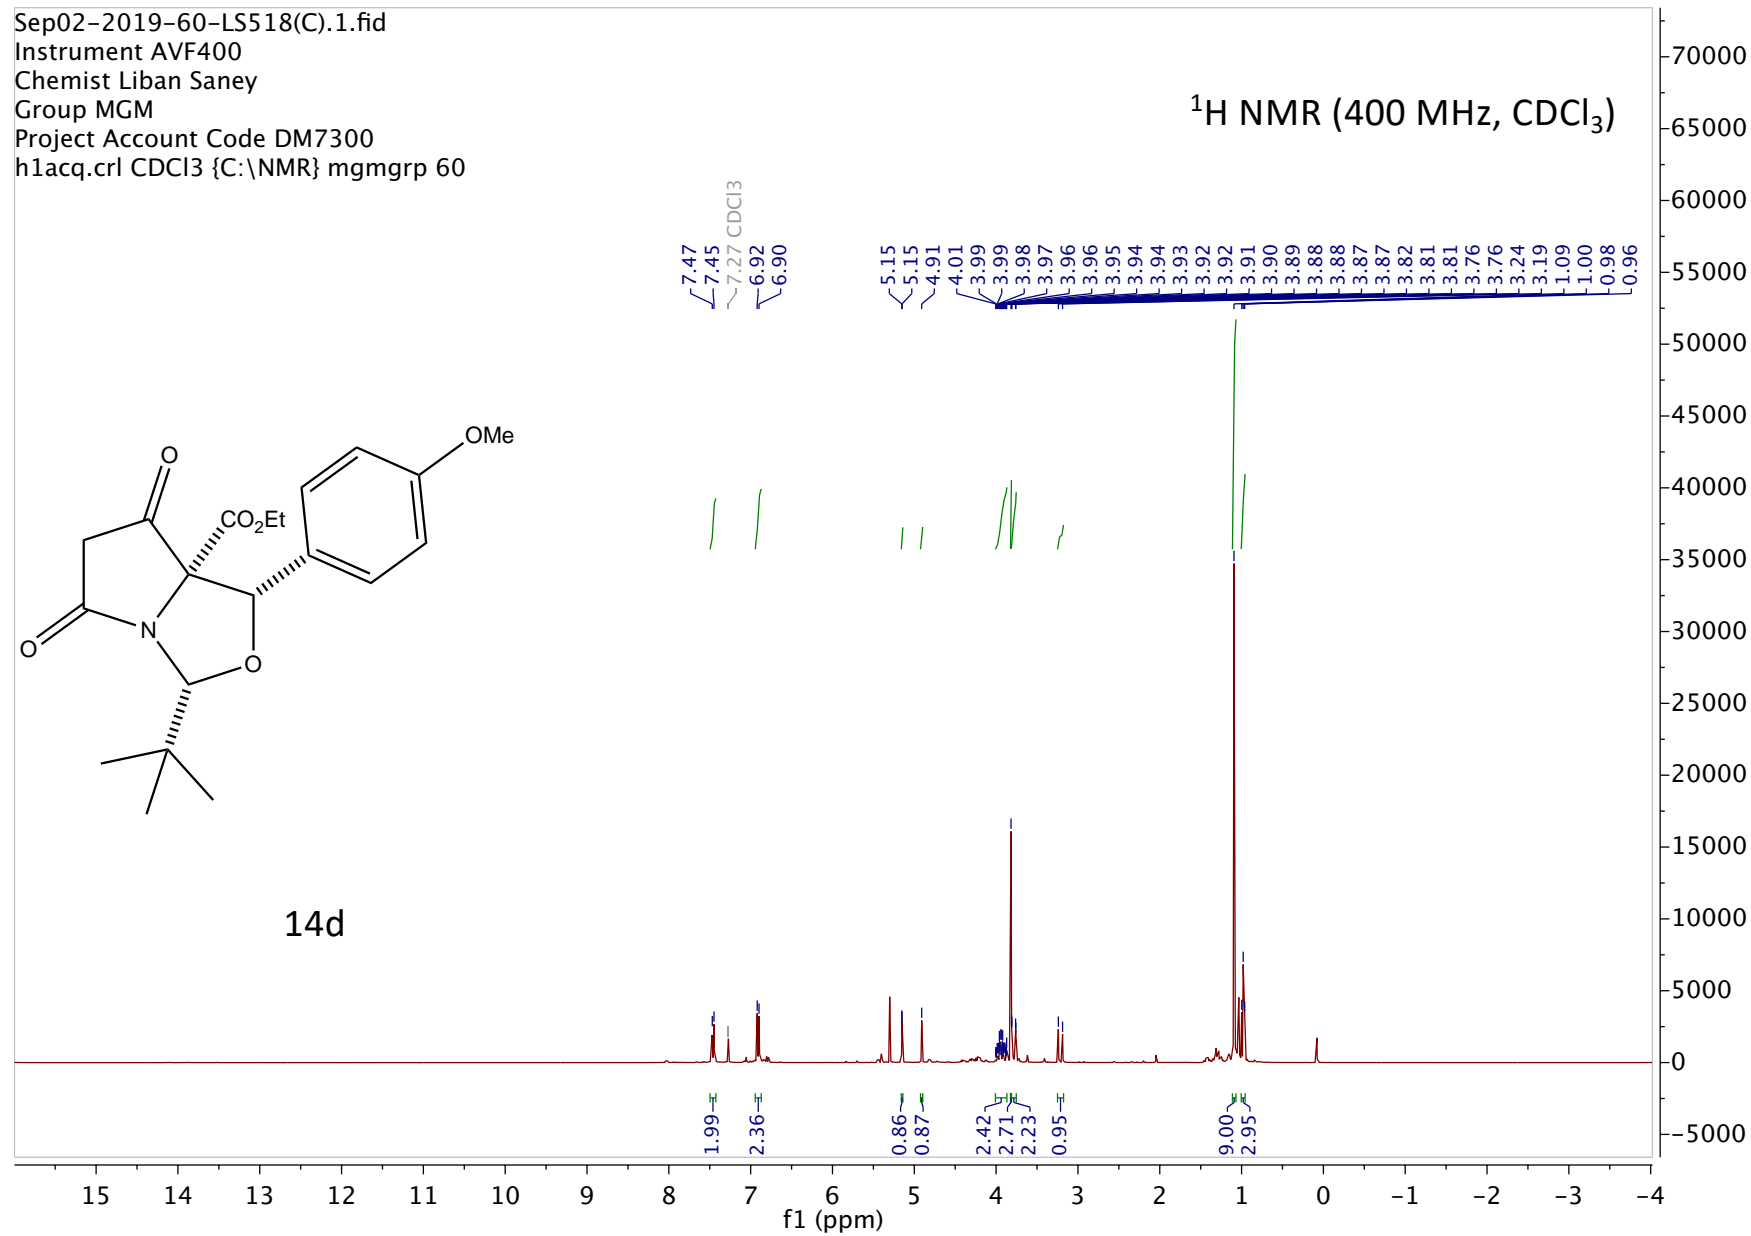



Sep02-2019-60-LS518(C).4.fid

Instrument AVF400

Chemist Liban Saney

Group MGM

Project Account Code DM7300

c13acq\_512.crl CDCl3 {C:\NMR} mgmgrp 60

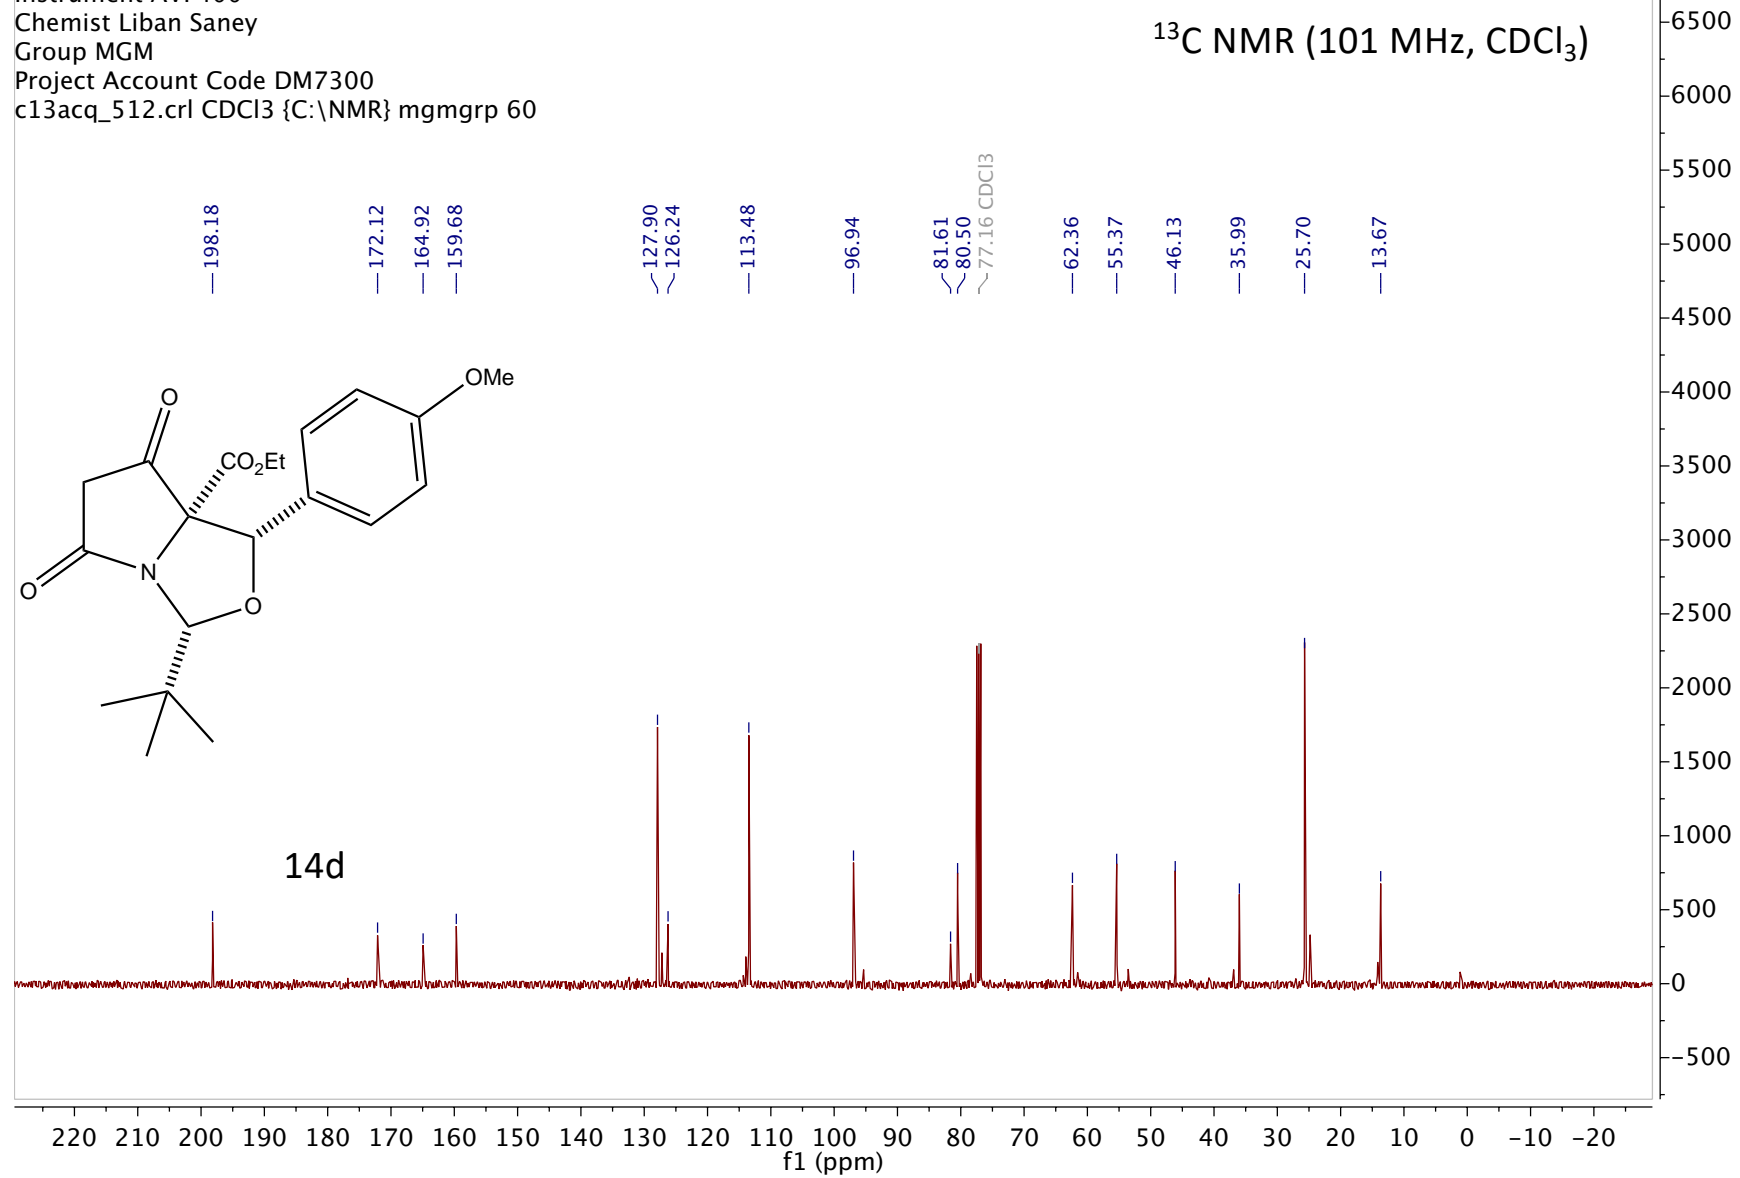

Sep23-2019-59-LS541(C).1.fid  
Instrument AVF400  
Chemist Liban Saney  
Group MGM  
Project Account Code DM7300  
h1acq.crl CDCl3 {C:\NMR} mgmgrp 59

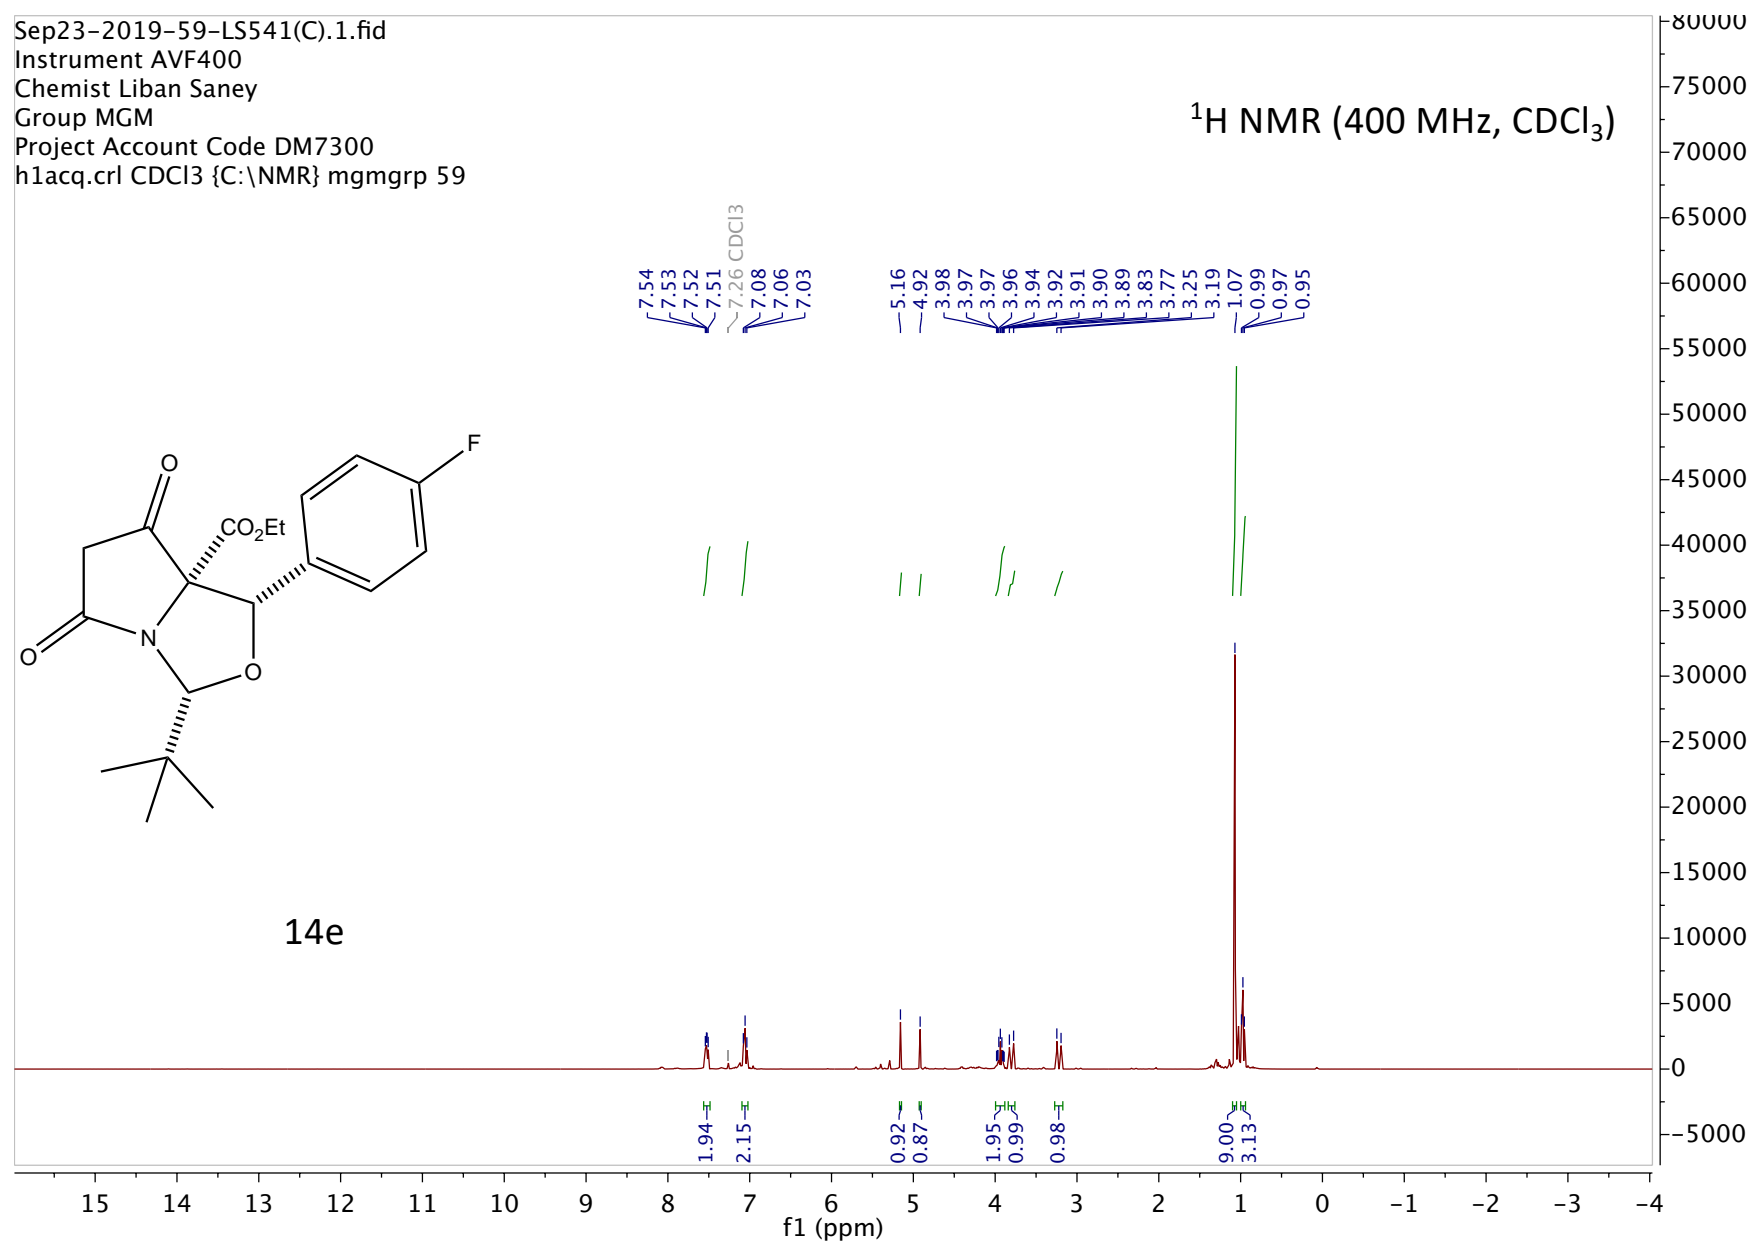

Sep23-2019-59-LS541(C).4.fid  
Instrument AVF400  
Chemist Liban Saney  
Group MGM  
Project Account Code DM7300  
c13acq\_512.crl CDCl3 {C:\NMR} mgmgrp 59

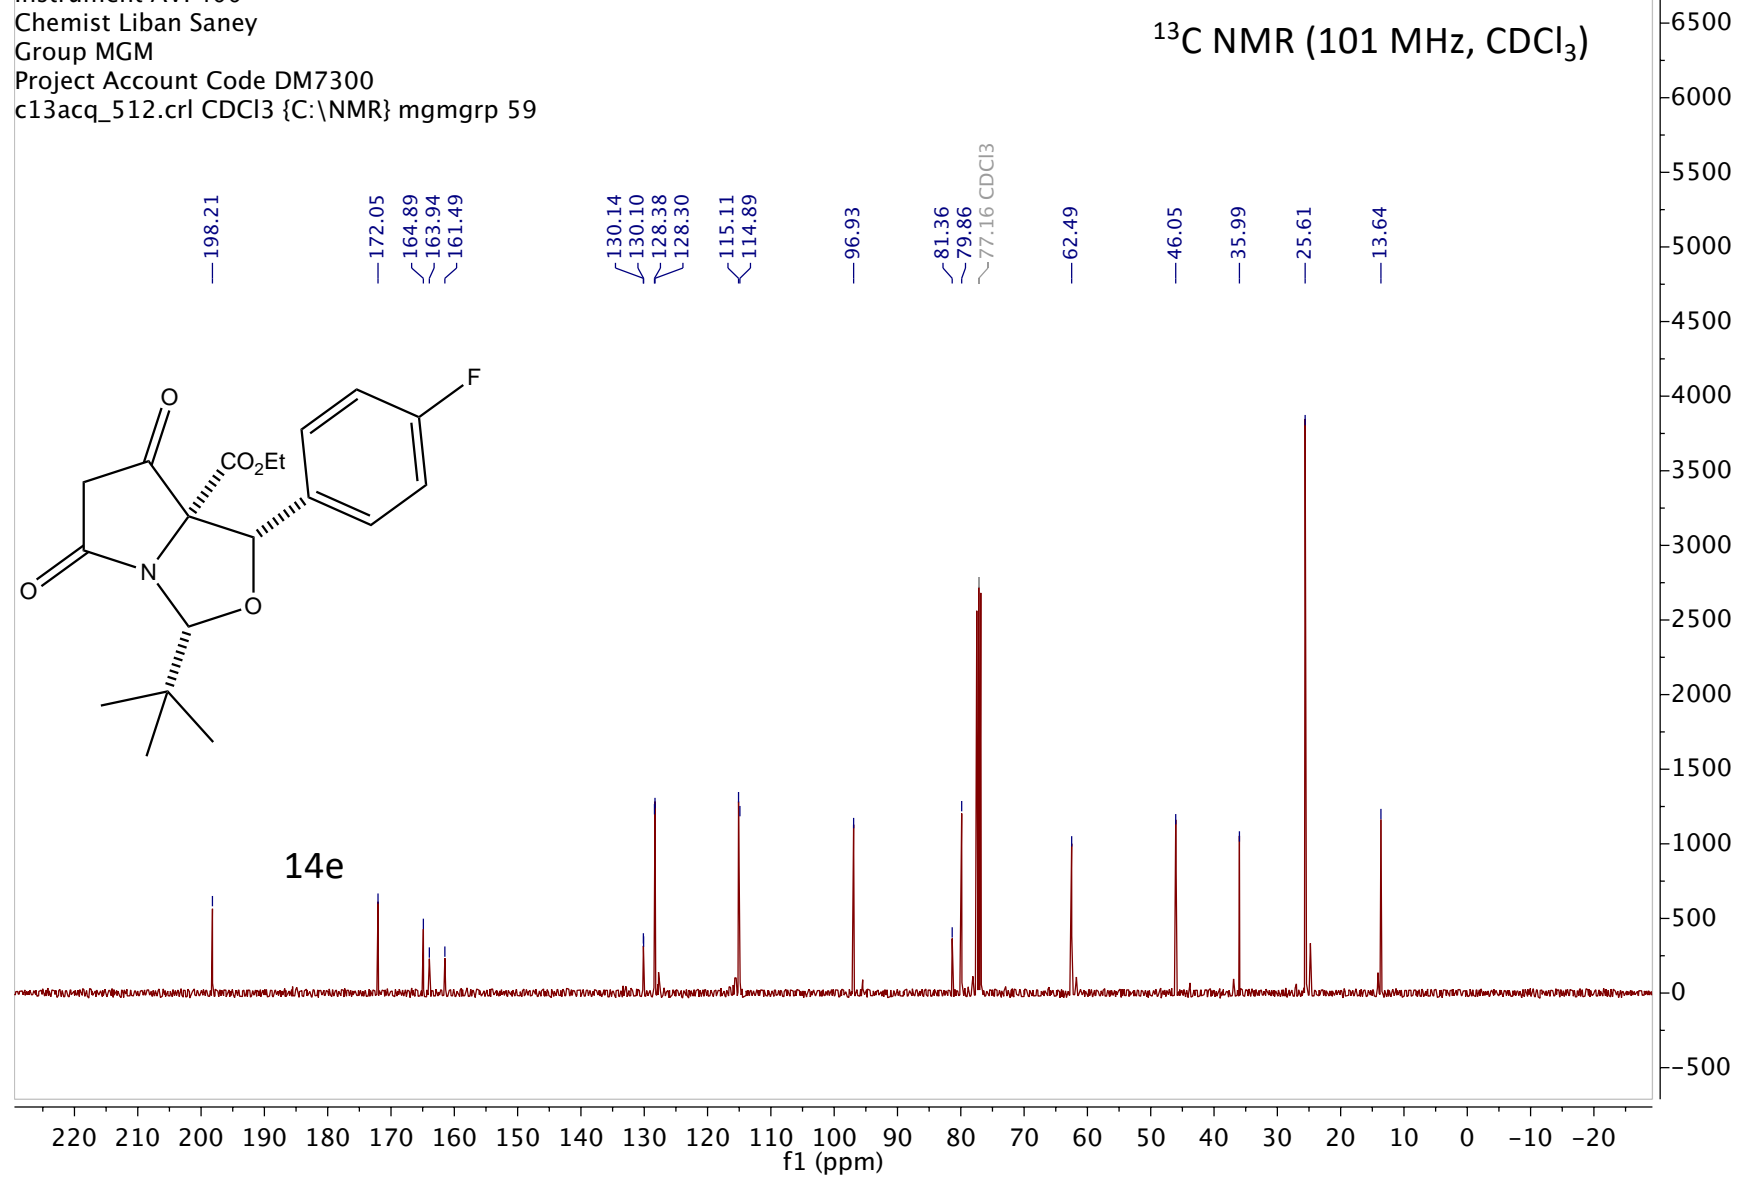

Sep23-2019-59-LS541(C).8.fid  
Instrument AVF400  
Chemist Liban Saney  
Group MGM  
Project Account Code DM7300  
f19dec\_256.crl CDCl3 {C:\NMR} mgmgrp 59

$^{19}\text{F}$  NMR (377 MHz,  $\text{CDCl}_3$ )

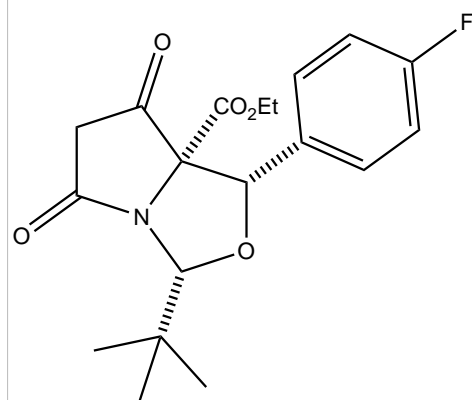

14e

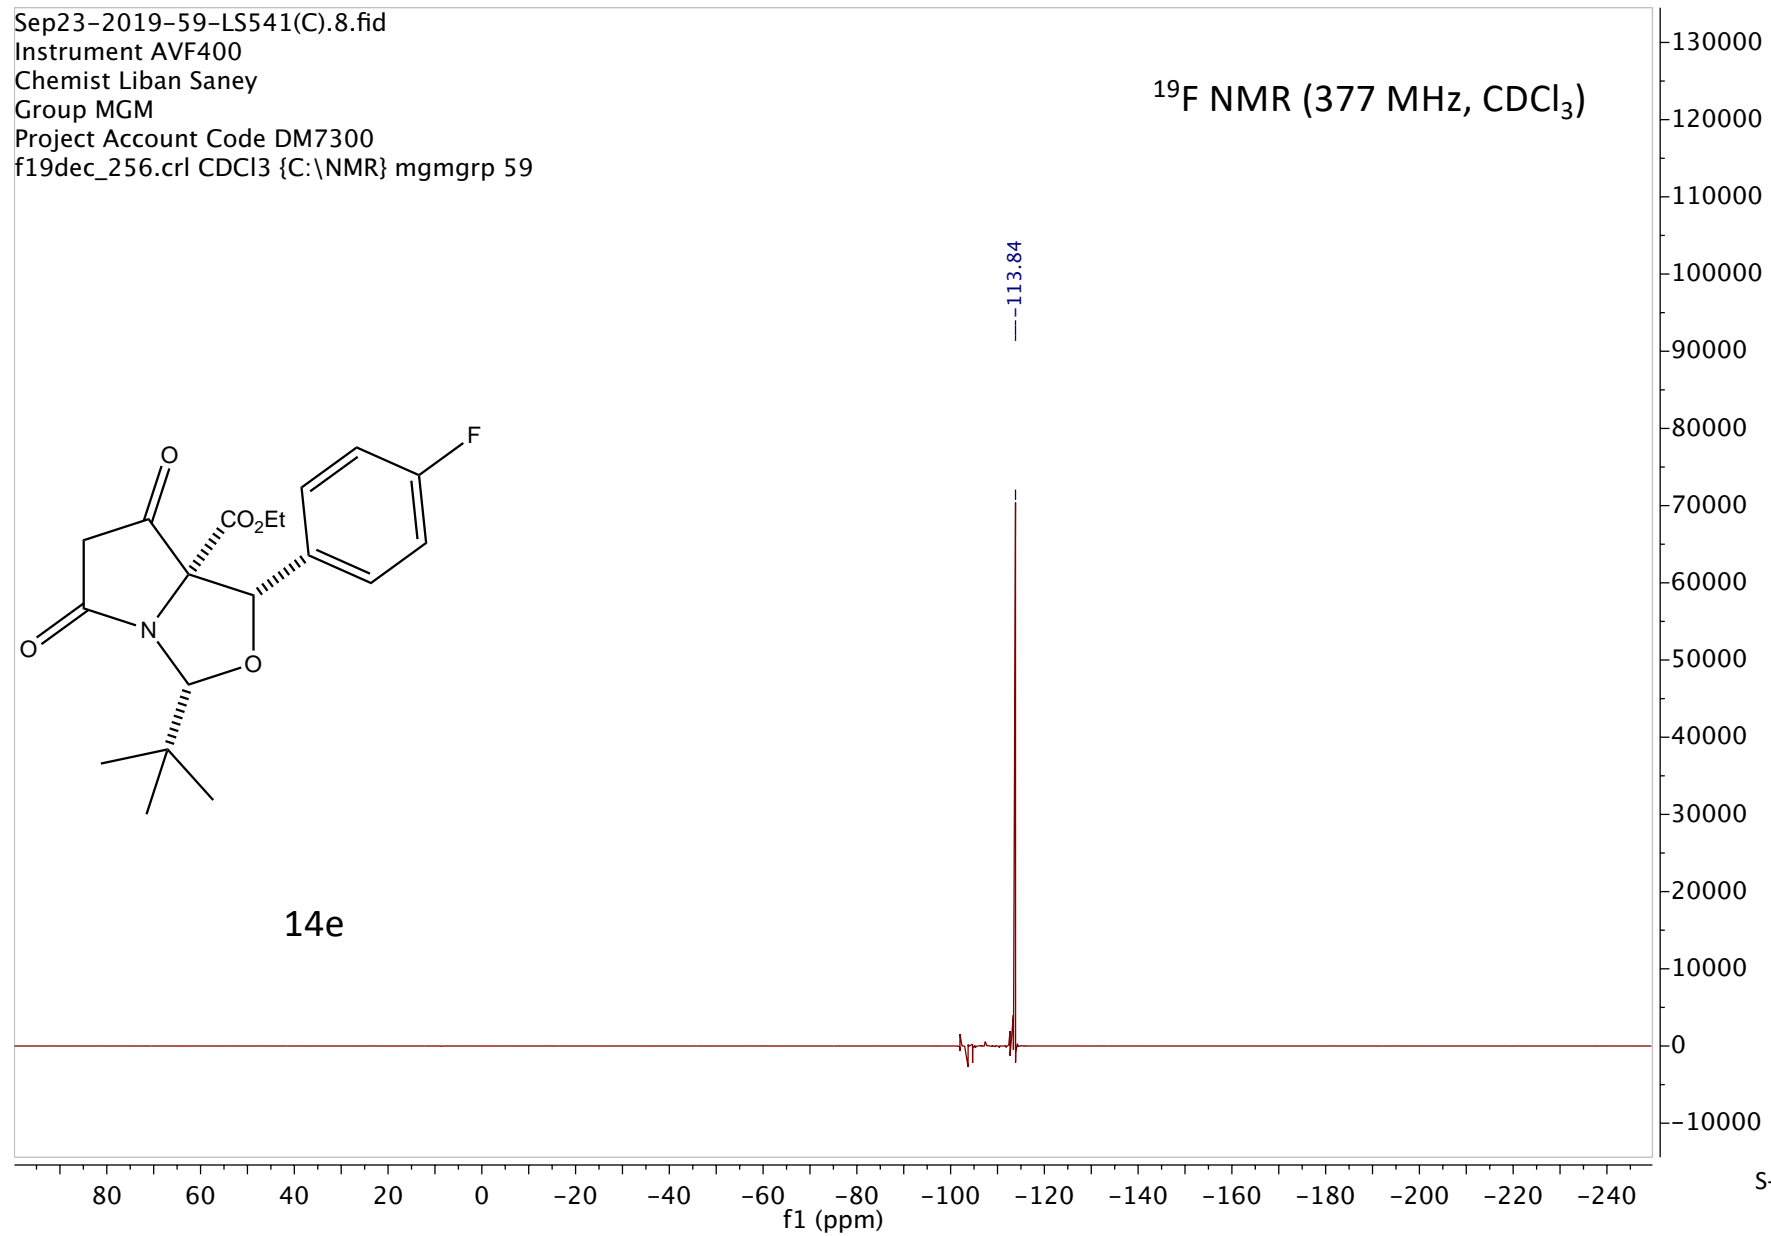

Sep23-2019-60-LS540(C).1.fid  
Instrument AVF400  
Chemist Liban Saney  
Group MGM  
Project Account Code DM7300  
h1acq.crl CDCl3 {C:\NMR} mgmgrp 60

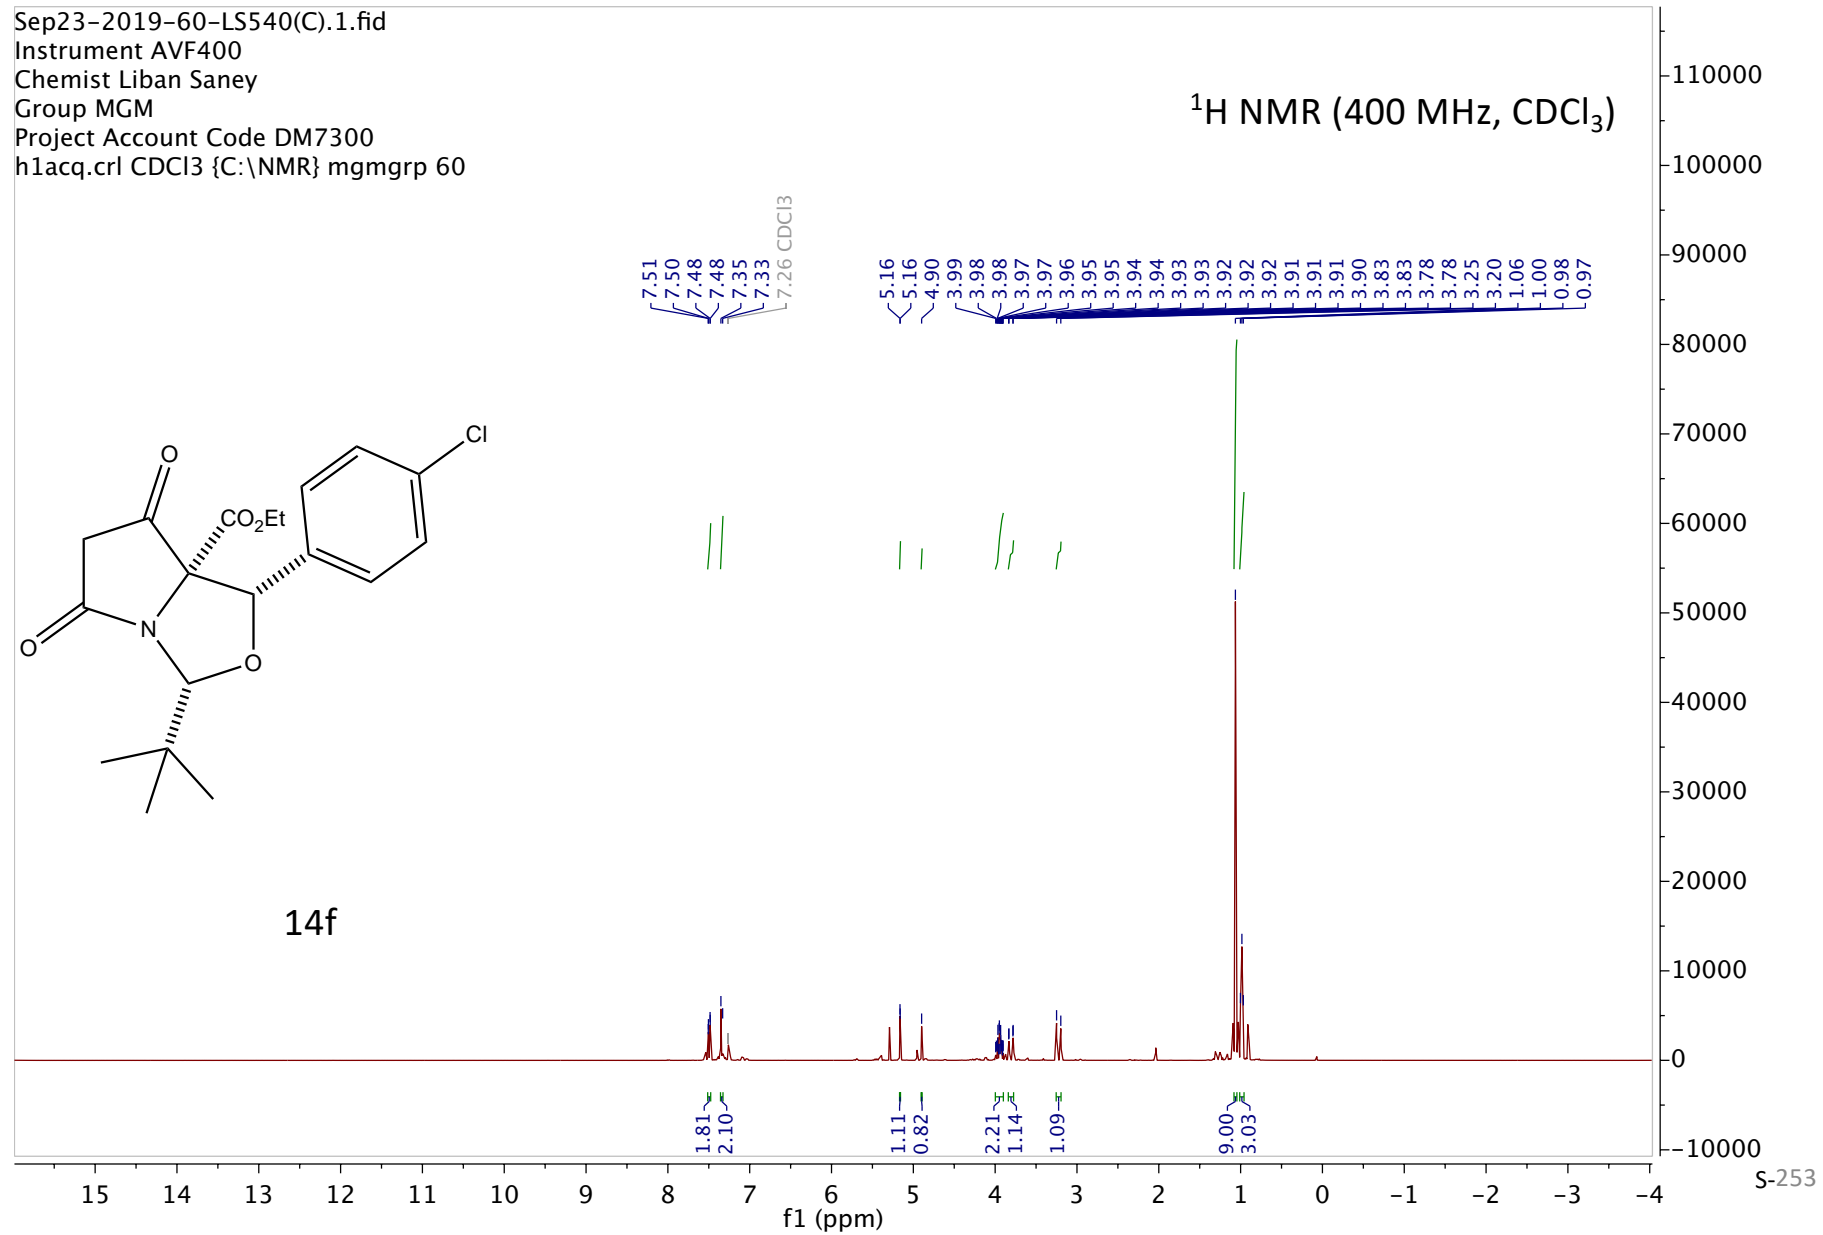

Sep23-2019-60-LS540(C).4.fid  
Instrument AVF400  
Chemist Liban Saney  
Group MGM  
Project Account Code DM7300  
c13acq\_512.crl CDCl3 {C:\NMR} mgmgrp 60

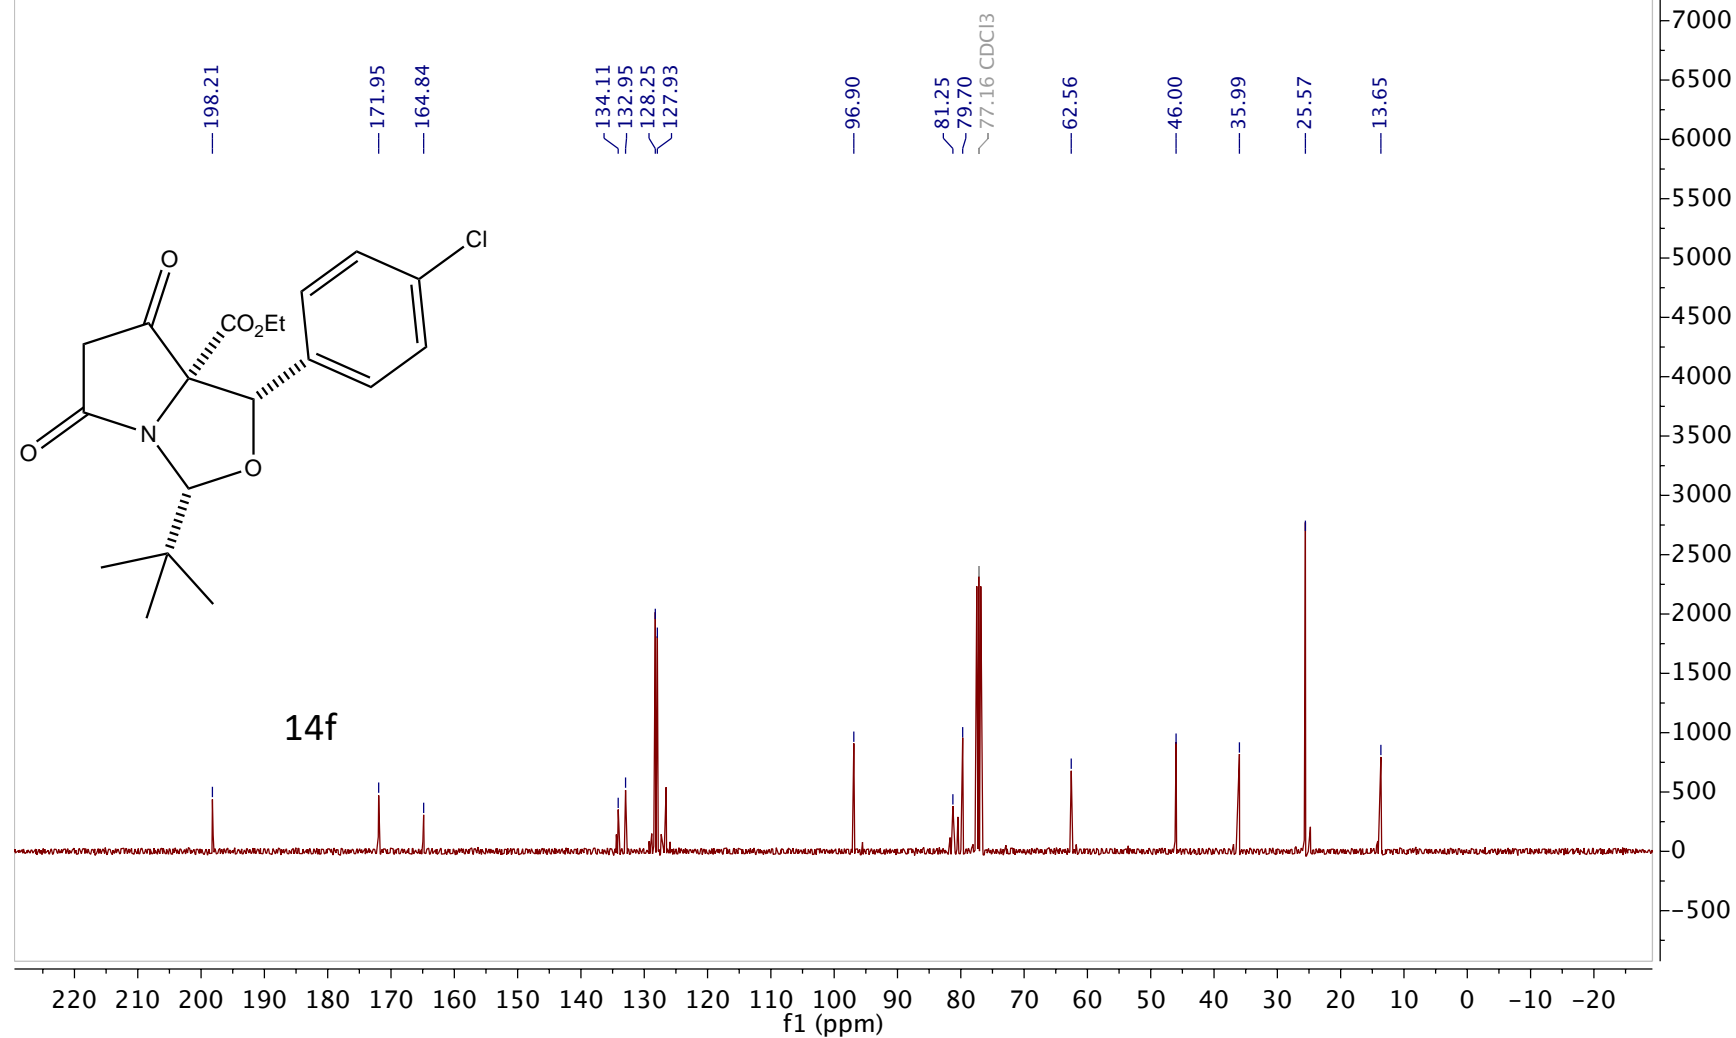

Feb25-2021-27-LS960(C).1.fid  
Instrument AVH400  
Group MGM  
Chemist Liban Saney  
Project Account Code DM7300  
h1acq.crl CDCl3 {C:\NMR} mgmgrp 27

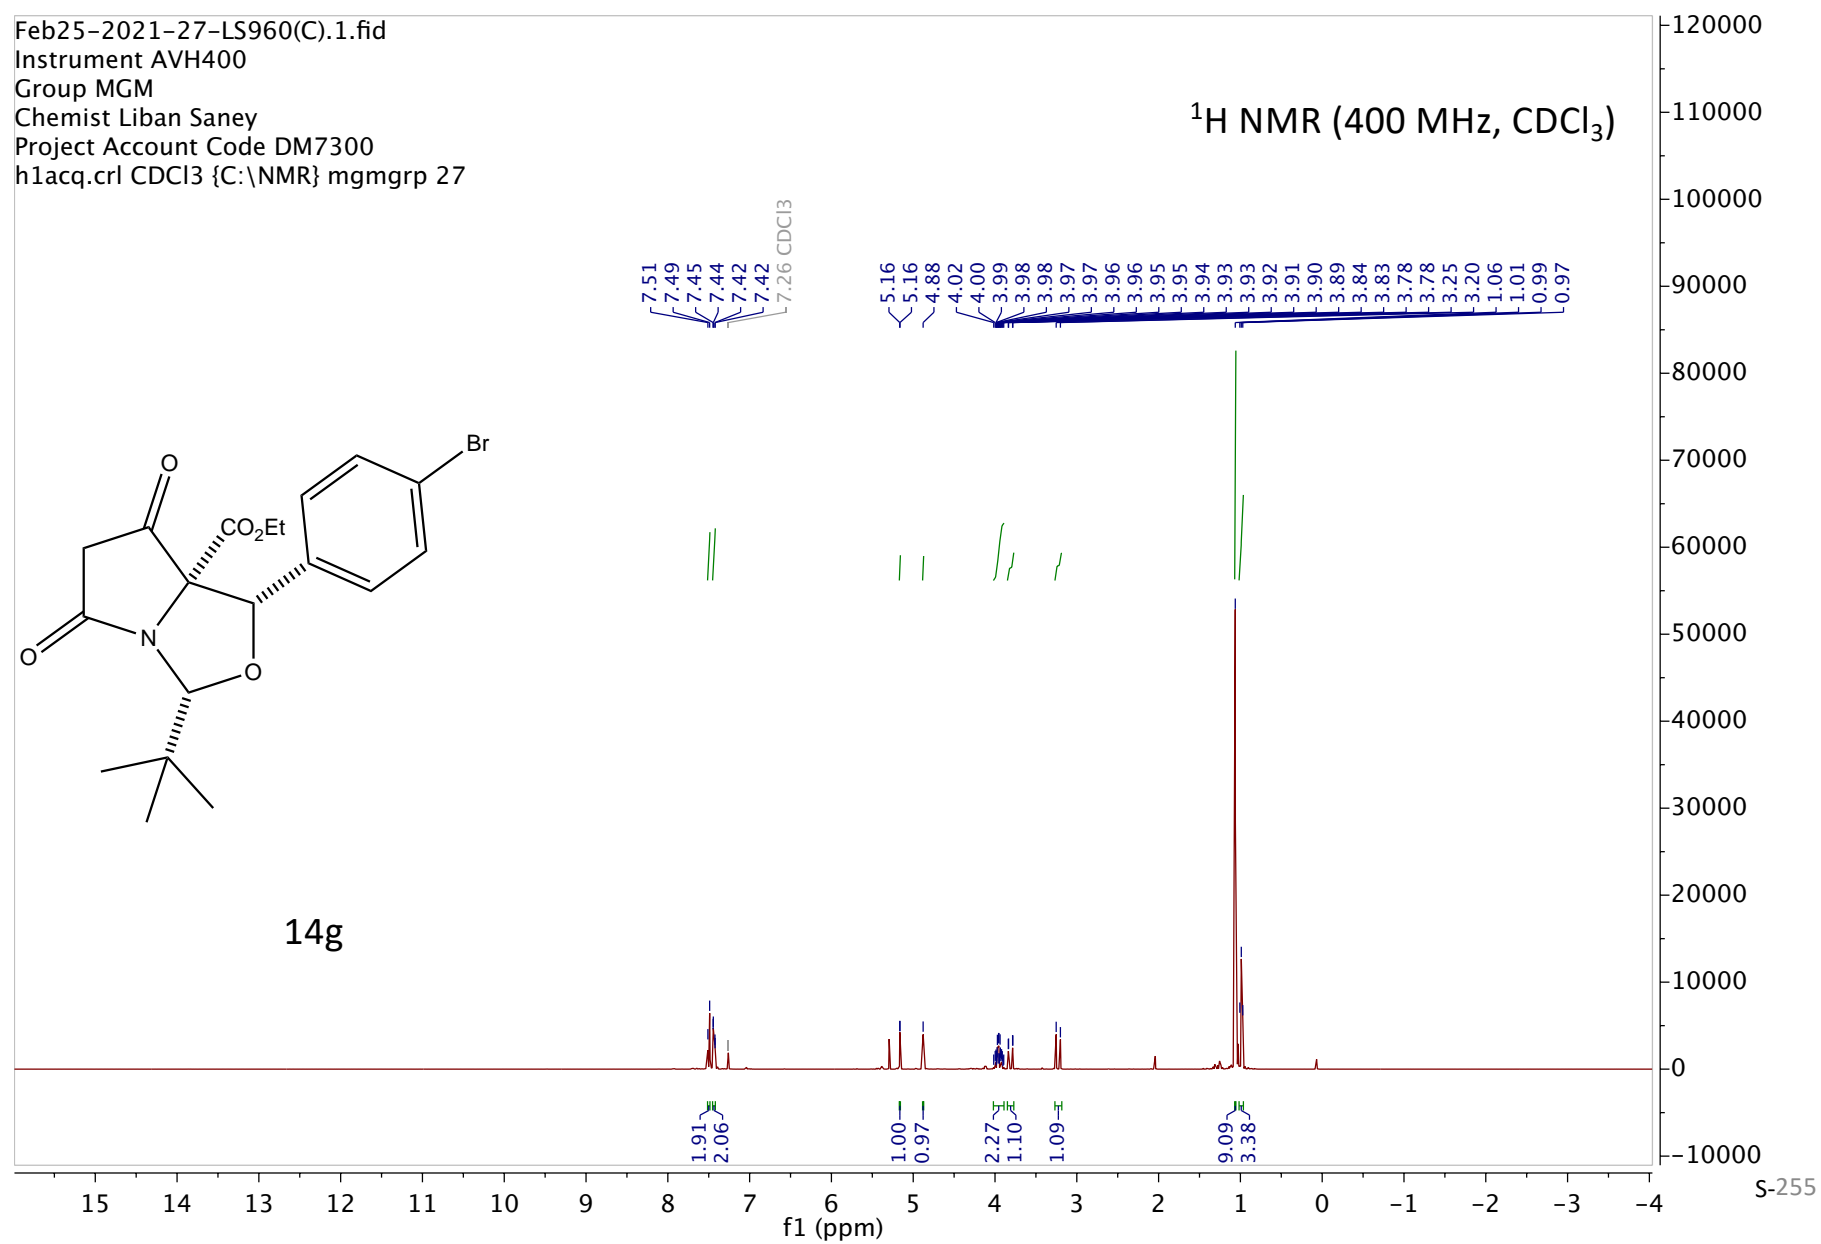

Feb25-2021-27-LS960(C).4.fid  
Instrument AVH400  
Group MGM  
Chemist Liban Saney  
Project Account Code DM7300  
c13acq\_512.crl CDCl3 {C:\NMR} mgmgrp 27

<sup>13</sup>C NMR (101 MHz, CDCl<sub>3</sub>)

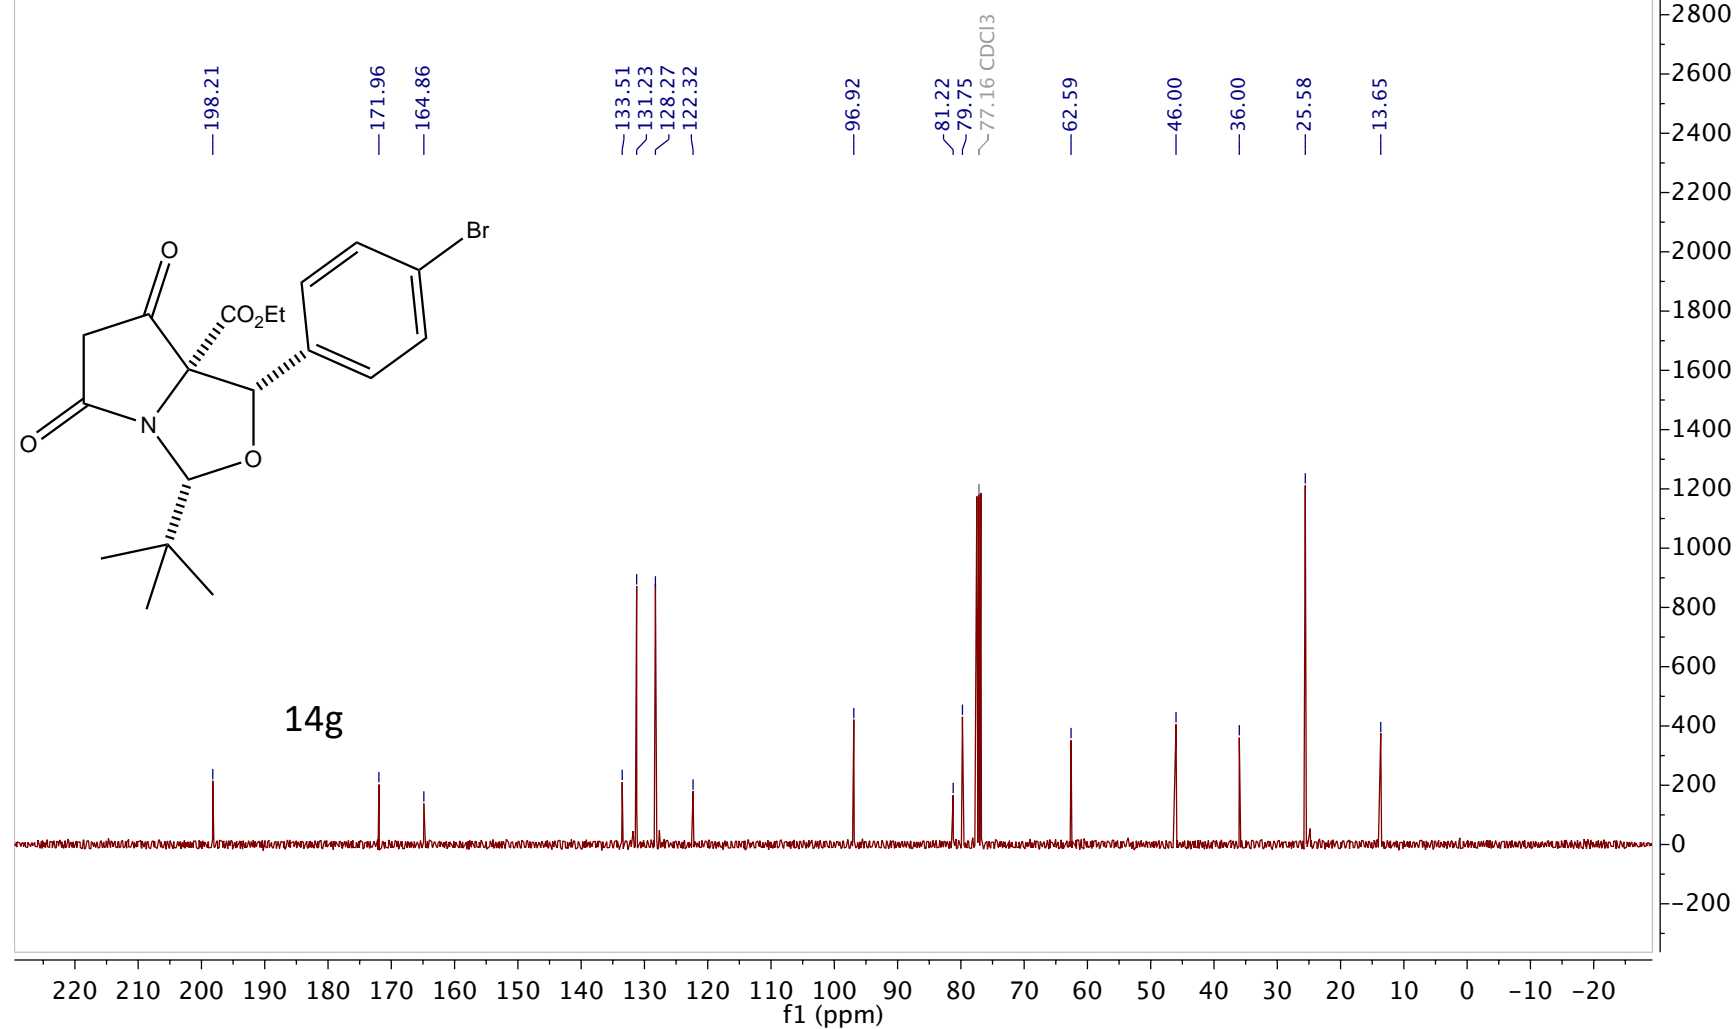



Feb25-2021-31-LS963(C).1.fid  
Instrument AVH400  
Group MGM  
Chemist Liban Saney  
Project Account Code DM7300  
h1acq.crl CDCl3 {C:\NMR} mgmgrp 31

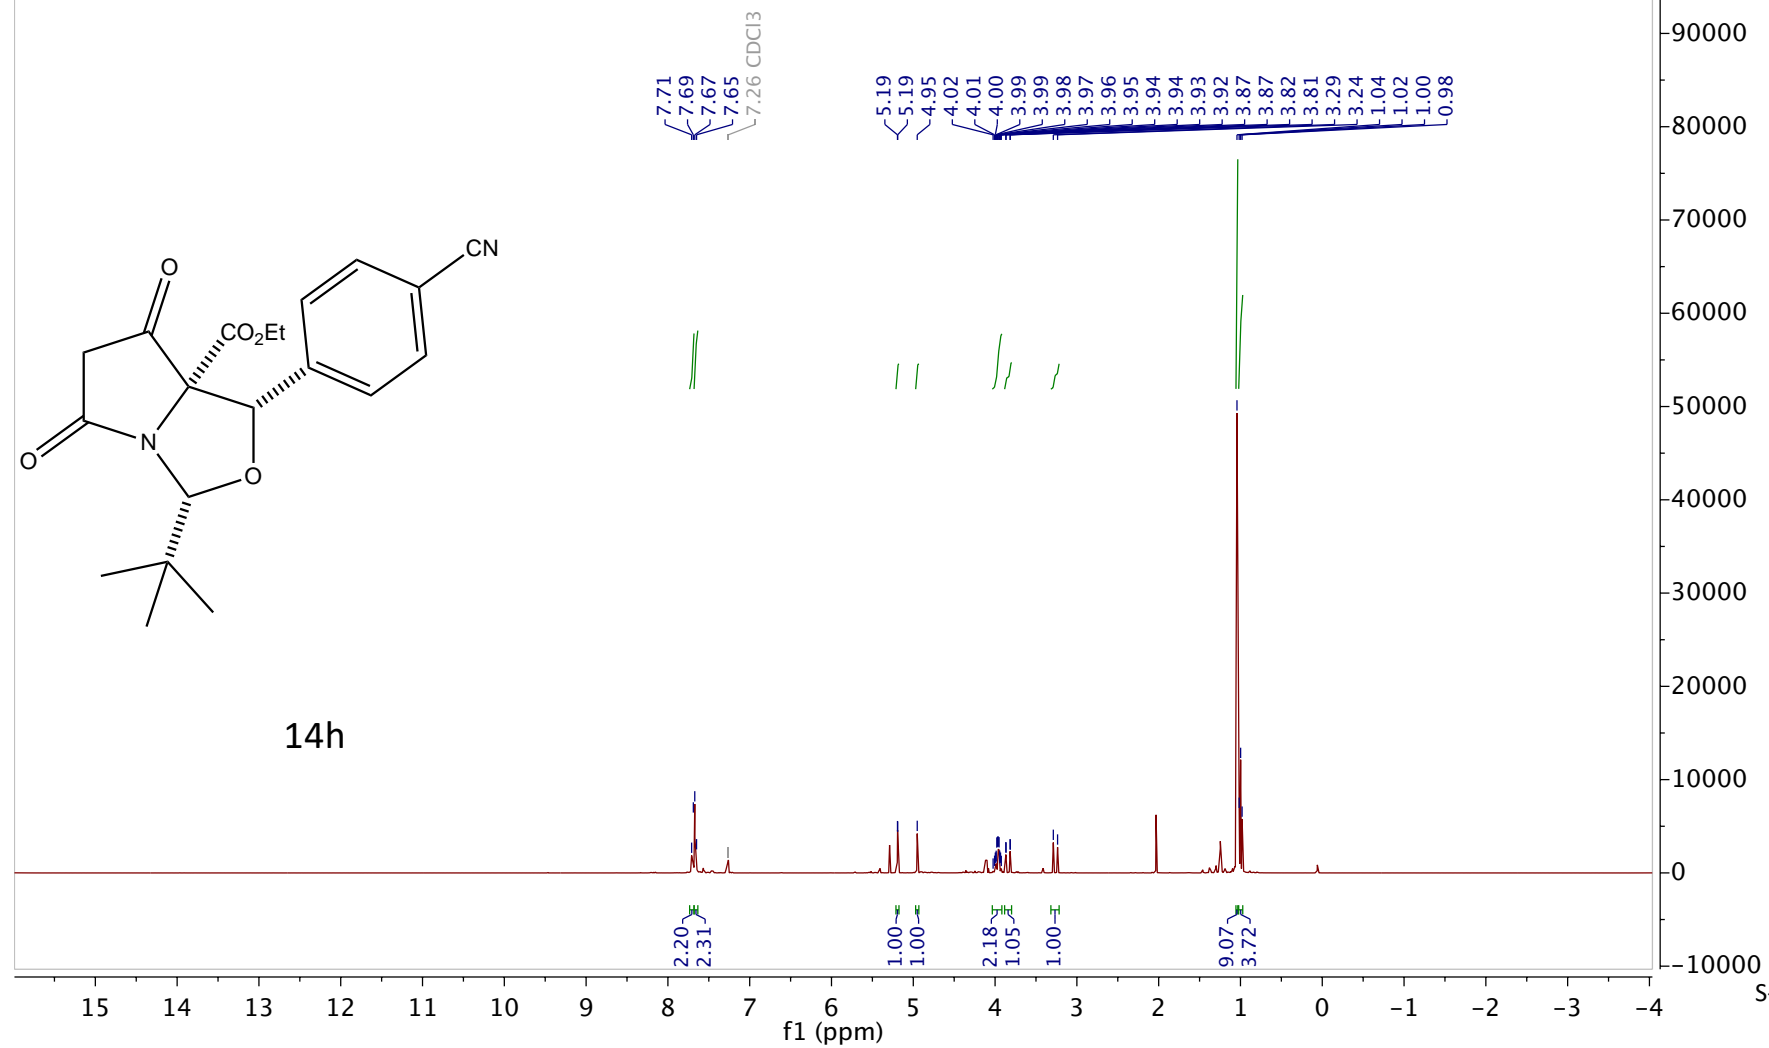

Feb25-2021-31-LS963(C).4.fid

Instrument AVH400

Group MGM

Chemist Liban Saney

Project Account Code DM7300

c13acq\_512.crl CDCl3 {C:\NMR} mgmgrp 31

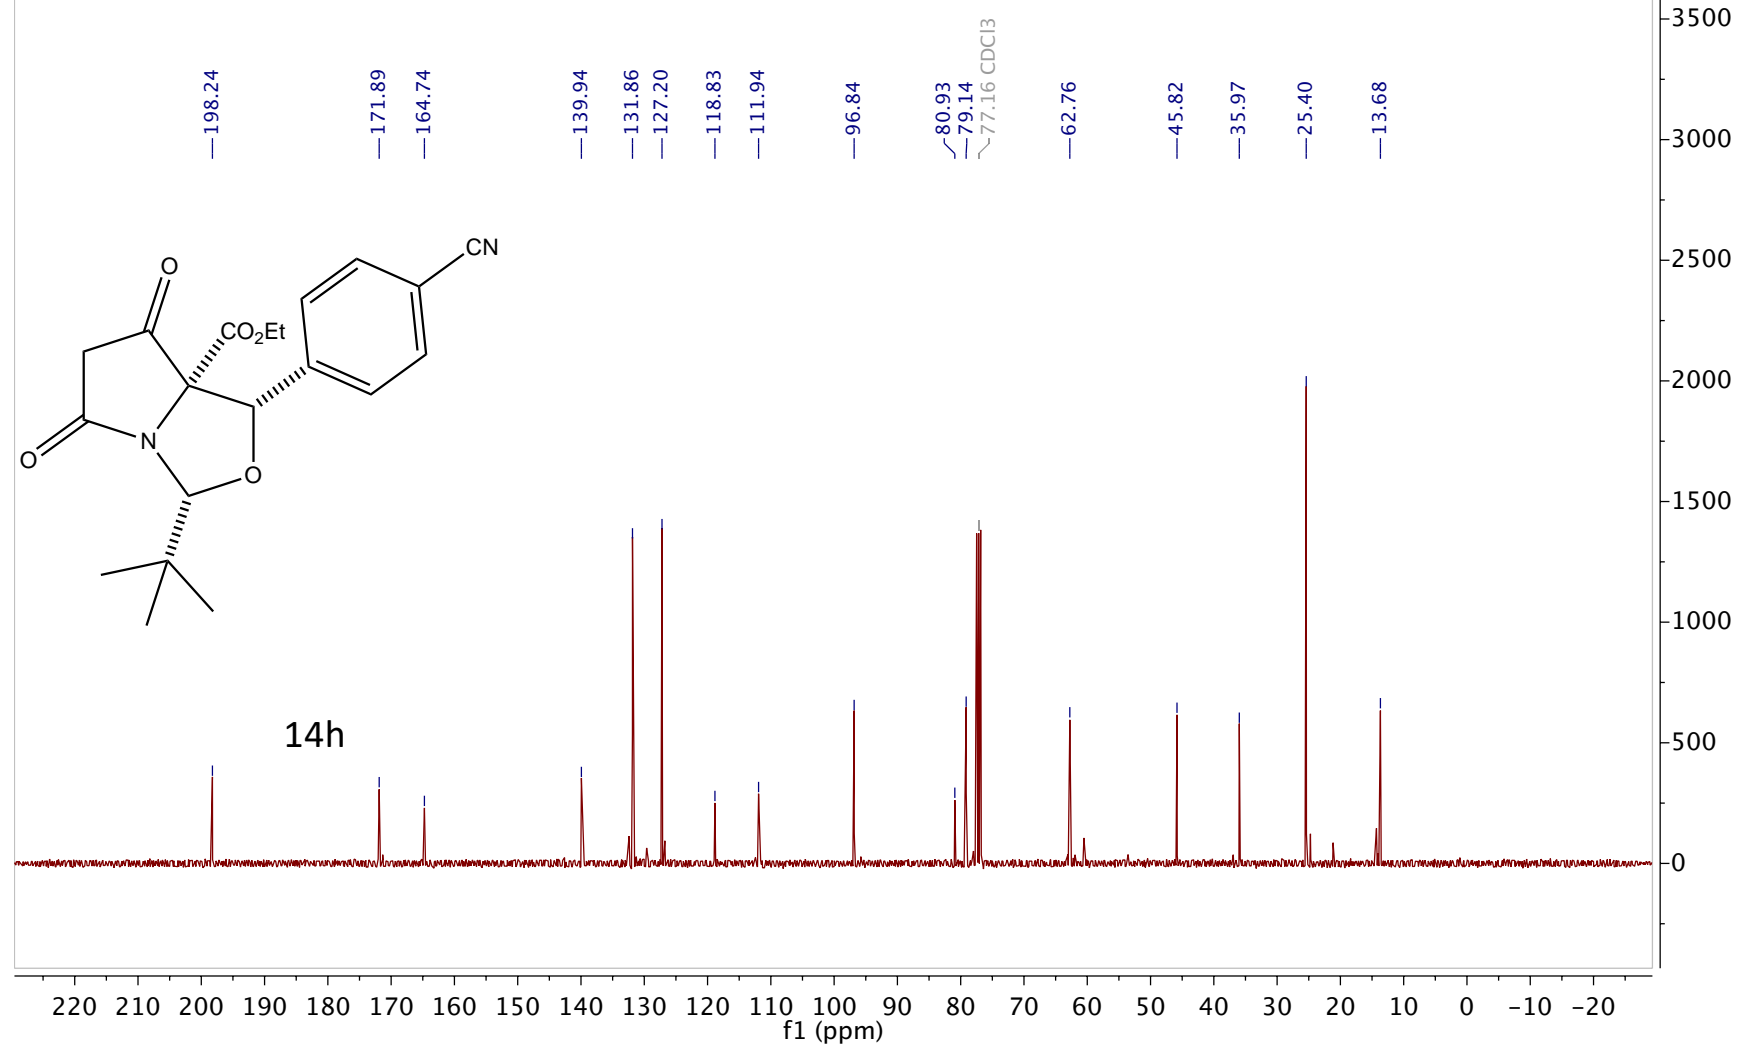

Feb25-2021-30-LS962(C).1.fid  
Instrument AVH400  
Group MGM  
Chemist Liban Saney  
Project Account Code DM7300  
h1acq.crl CDCl3 {C:\NMR} mgmgrp 30

<sup>1</sup>H NMR (400 MHz, CDCl<sub>3</sub>)

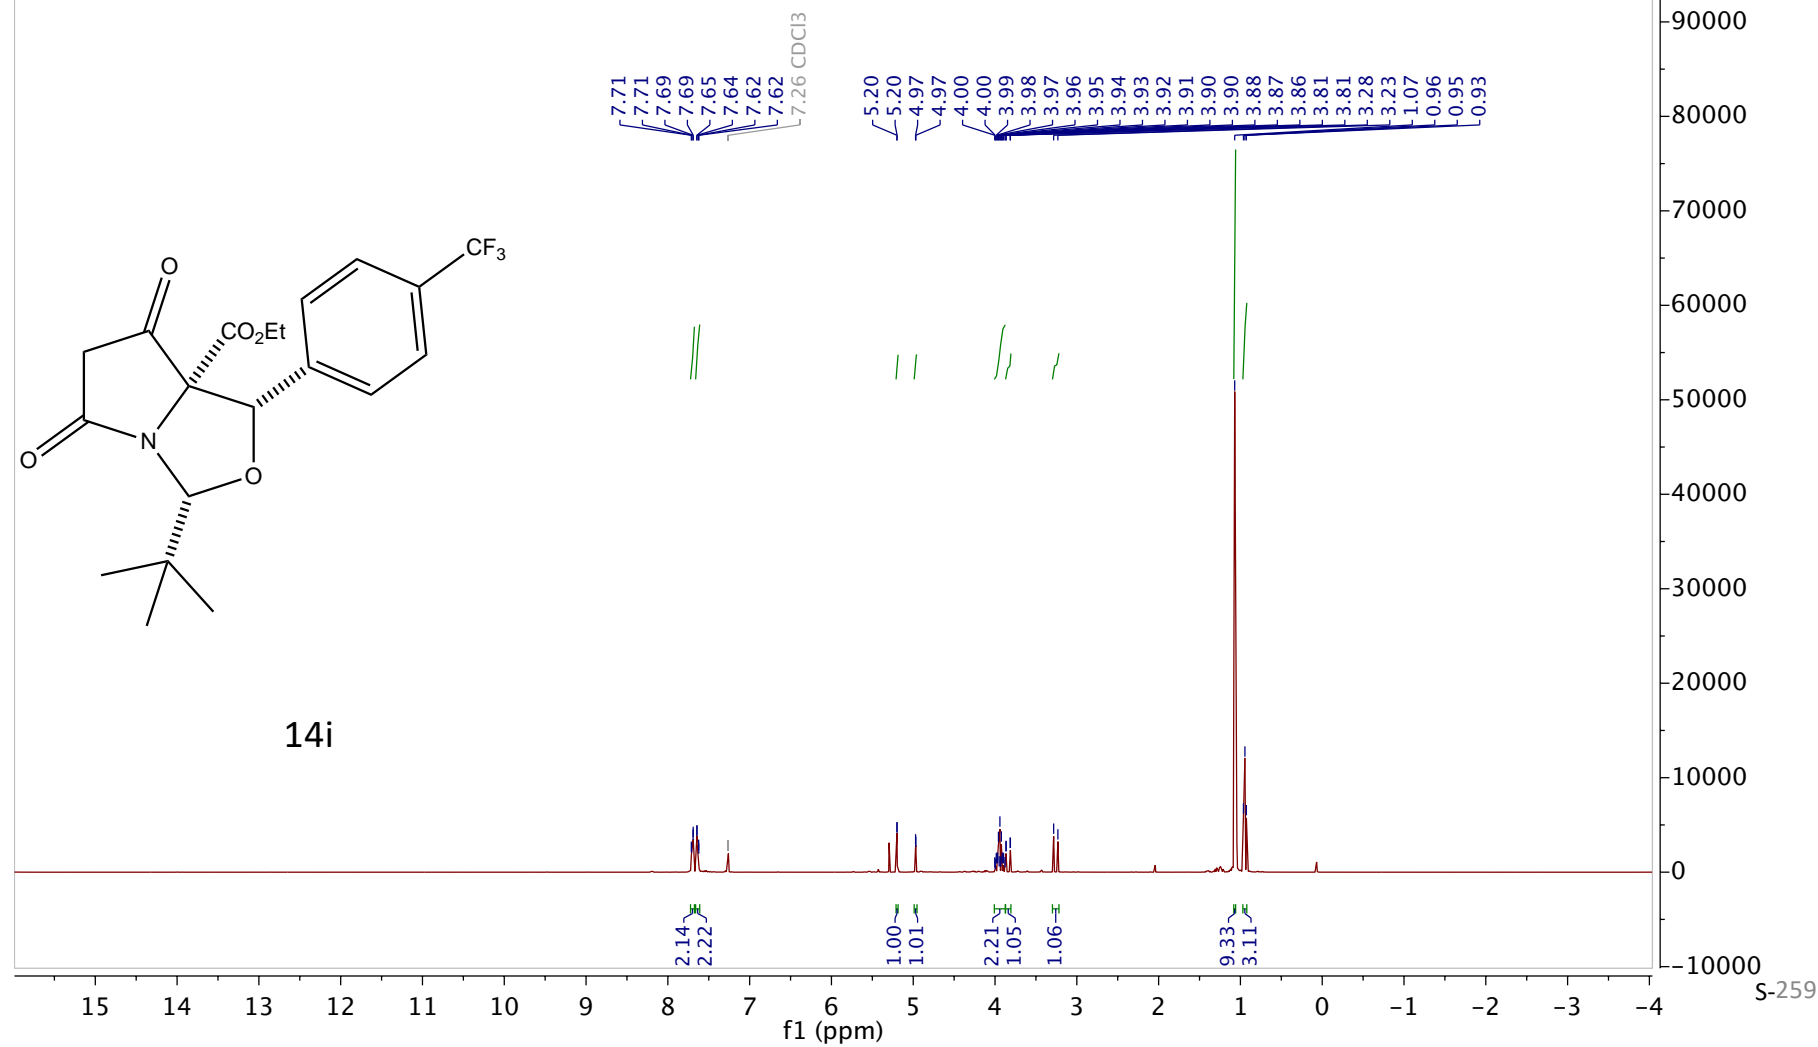

Feb25-2021-30-LS962(C).4.fid  
Instrument AVH400  
Group MGM  
Chemist Liban Saney  
Project Account Code DM7300  
c13acq\_512.crl CDCl3 {C:\NMR} mgmgrp 30

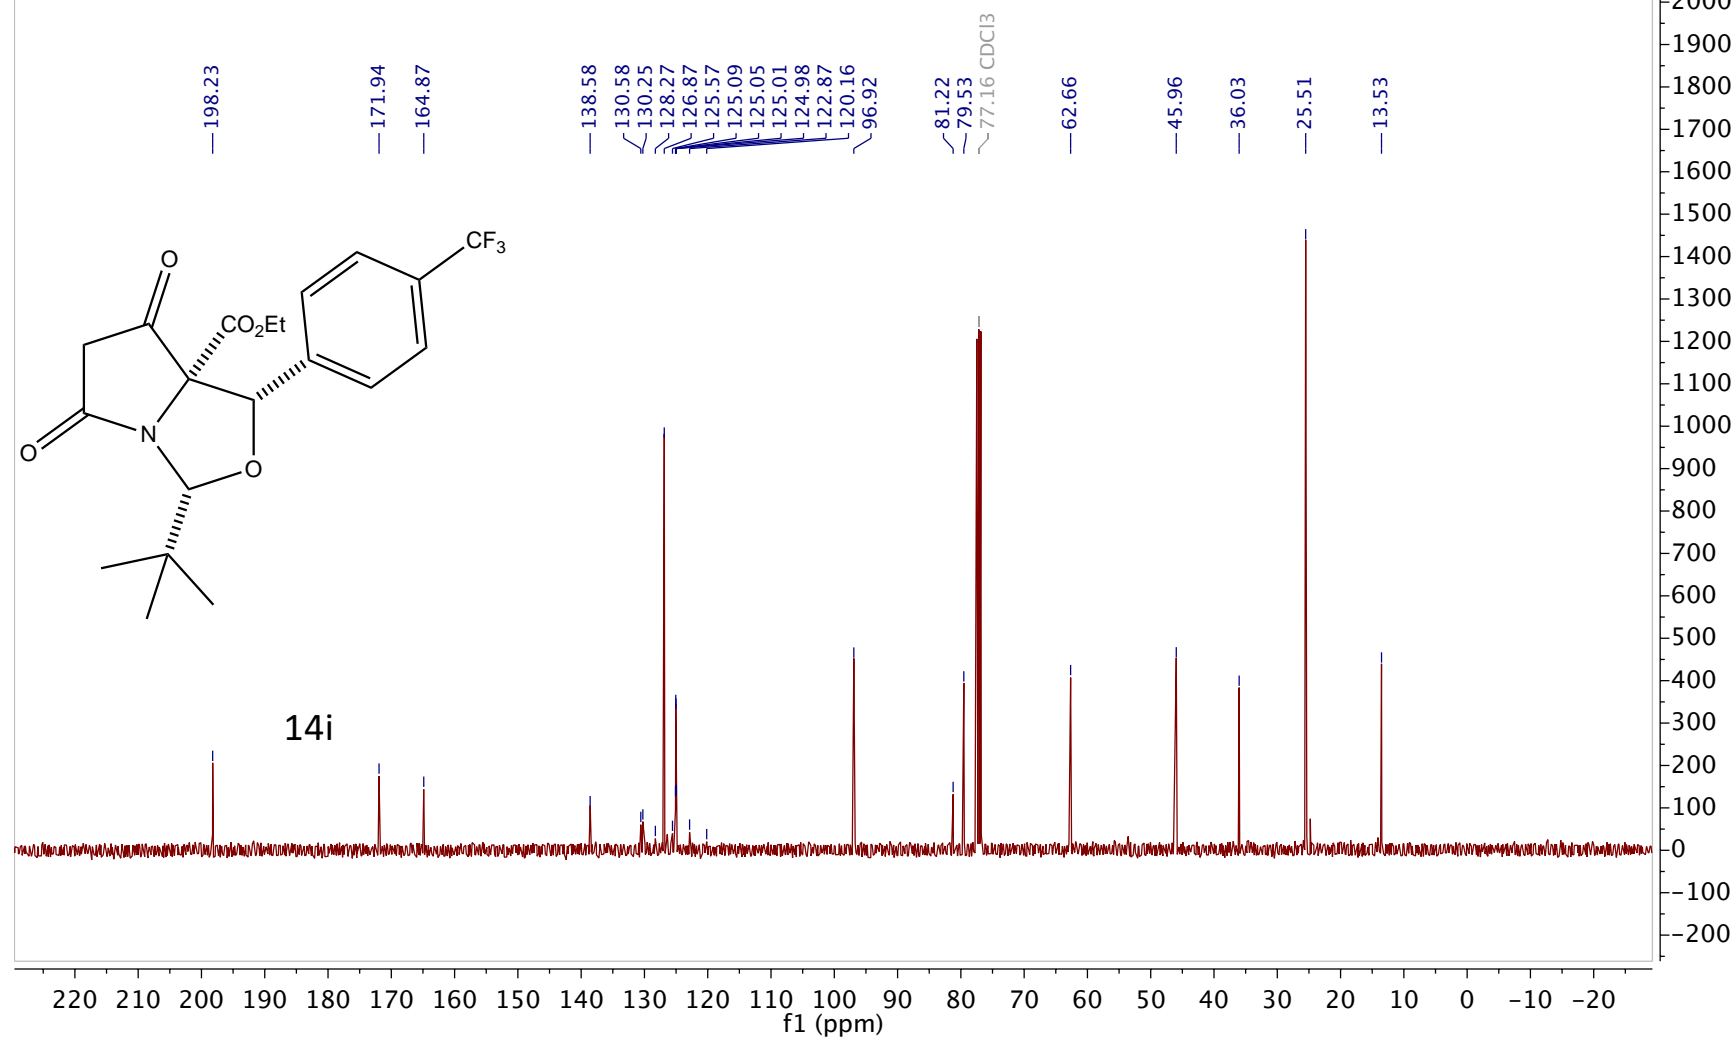

Feb25-2021-30-LS962(C).6.fid  
Instrument AVH400  
Group MGM  
Chemist Liban Saney  
Project Account Code DM7300  
f19dec\_256.crl CDCl3 {C:\NMR} mgmgrp 30

$^{19}\text{F}$  NMR (376 MHz,  $\text{CDCl}_3$ )

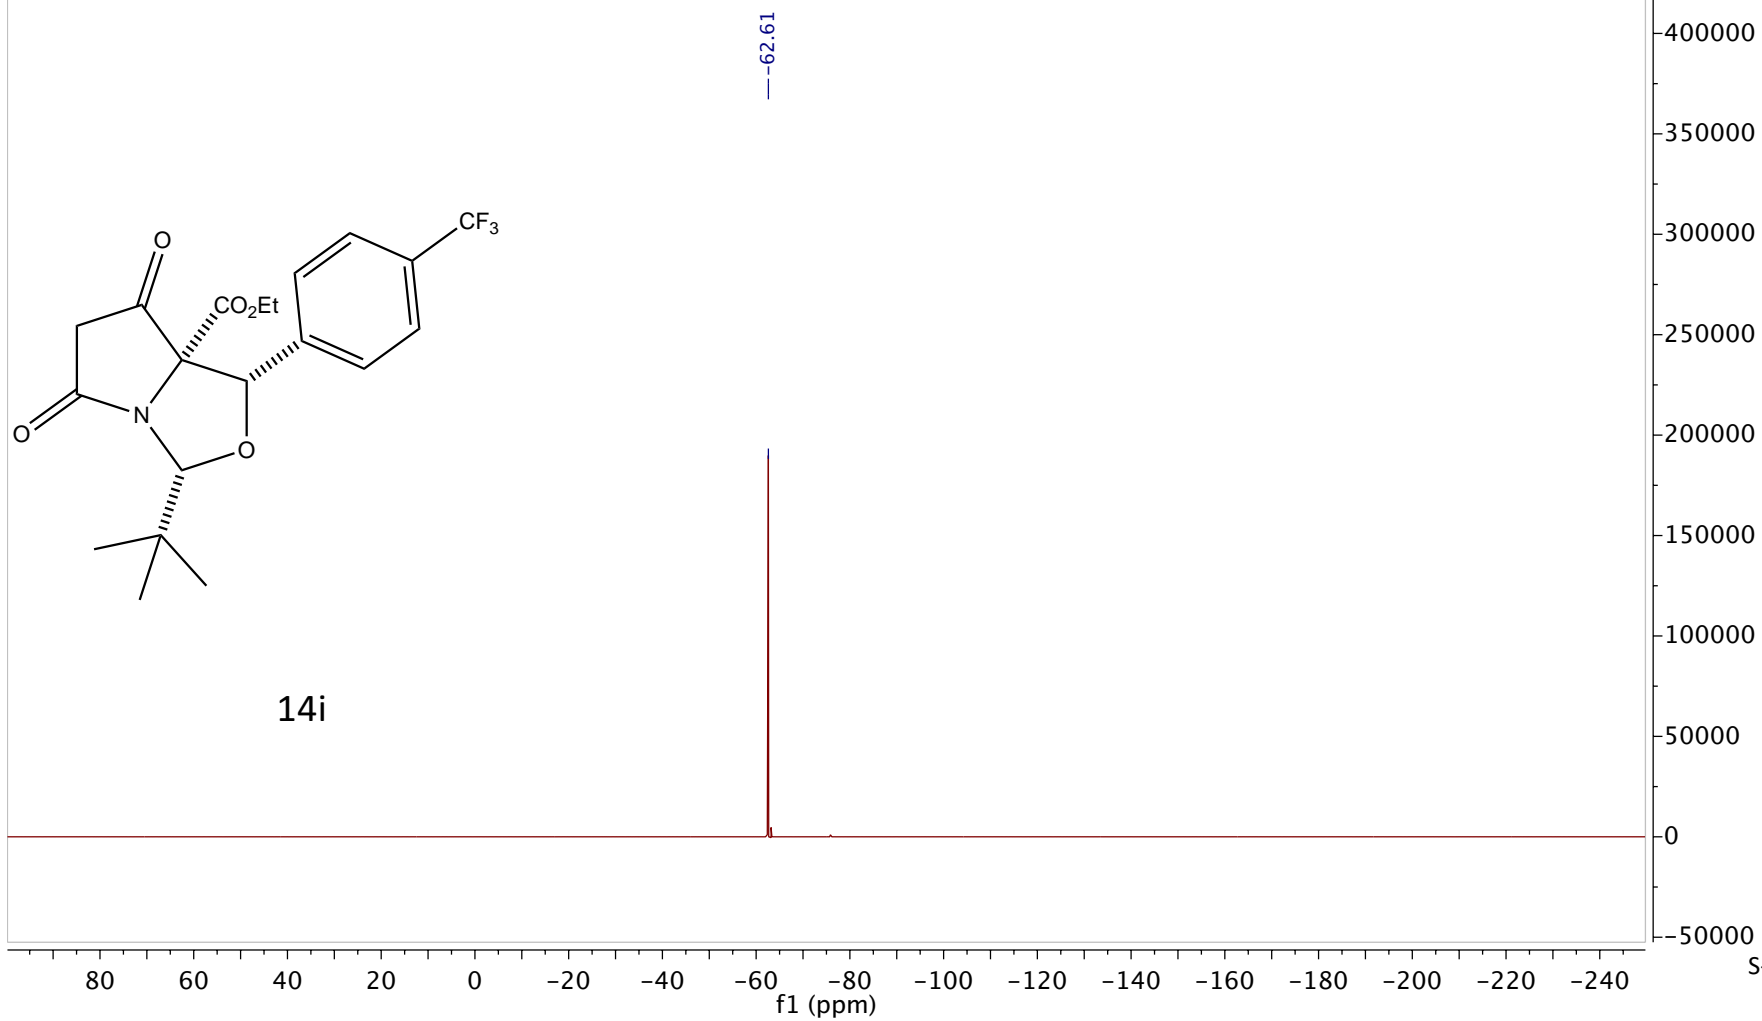

Feb25-2021-29-LS961(C).1.fid  
Instrument AVH400  
Group MGM  
Chemist Liban Saney  
Project Account Code DM7300  
h1acq.crl CDCl3 {C:\NMR} mgmgrp 29

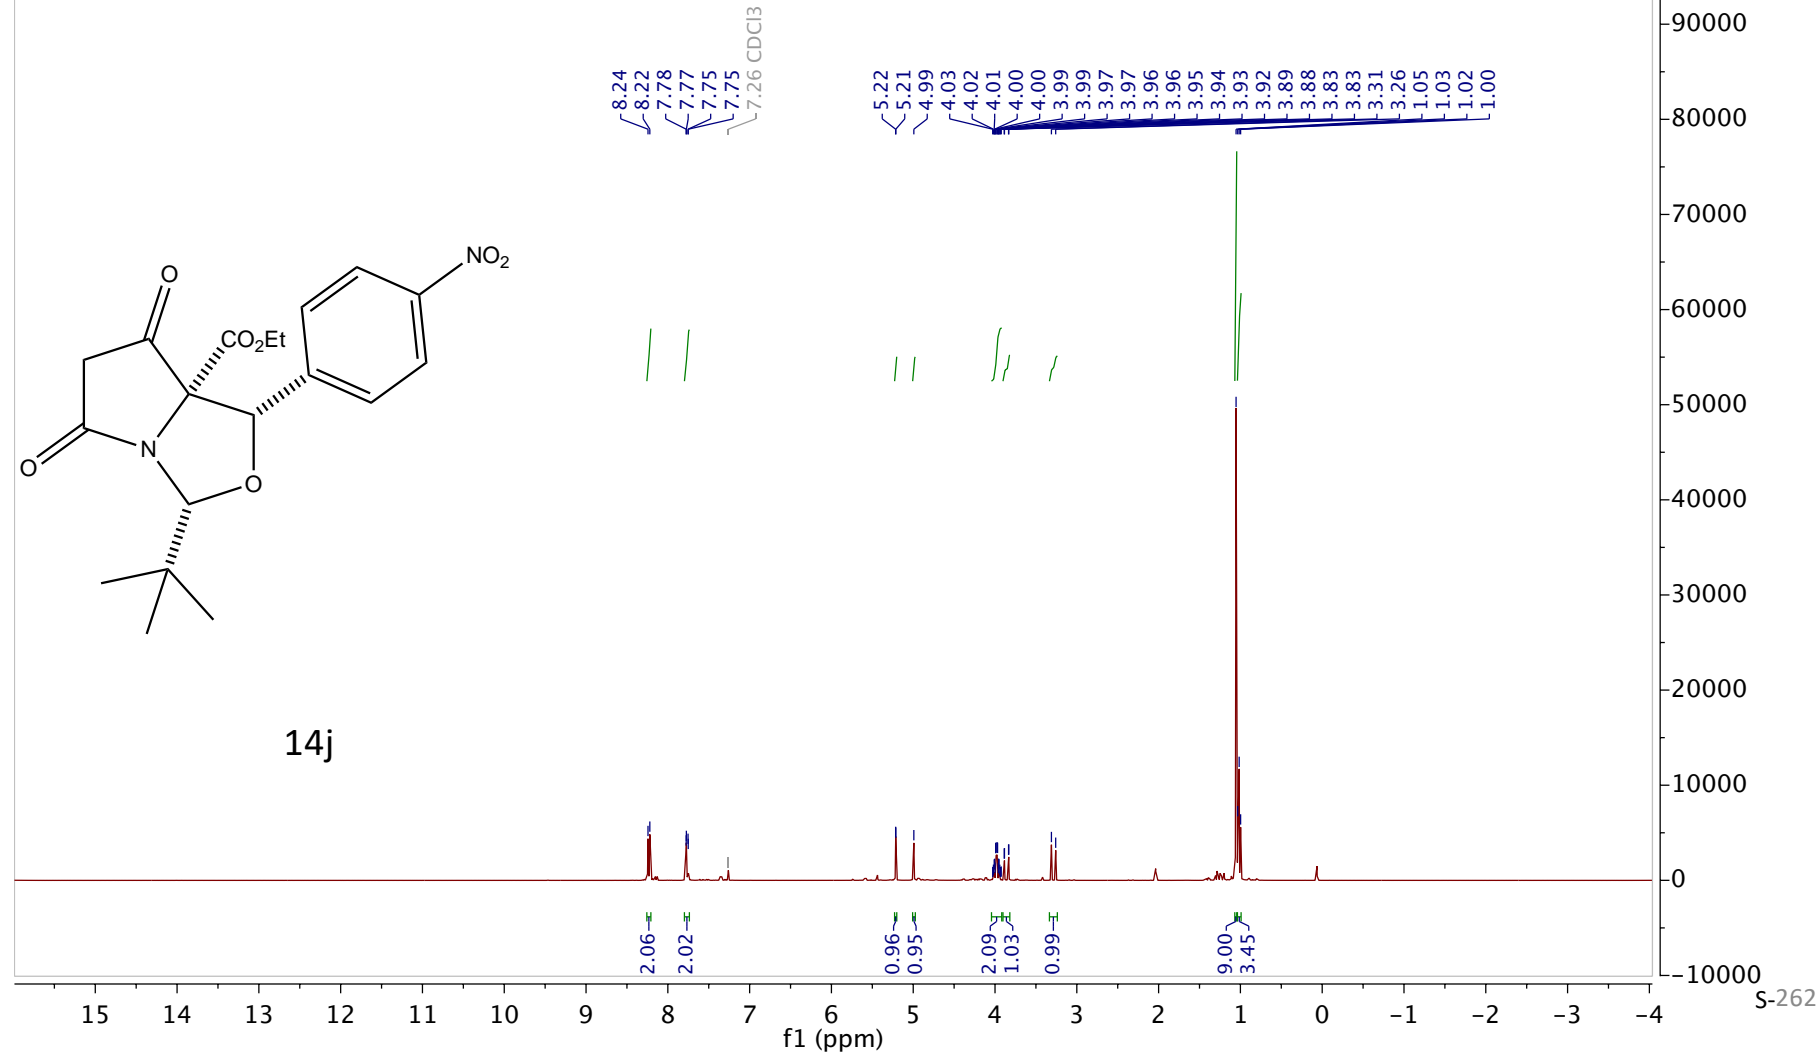

Feb25-2021-29-LS961(C).4.fid

Instrument AVH400

Group MGM

Chemist Liban Saney

Project Account Code DM7300

c13acq\_512.crl CDCl3 {C:\NMR} mgmgrp 29

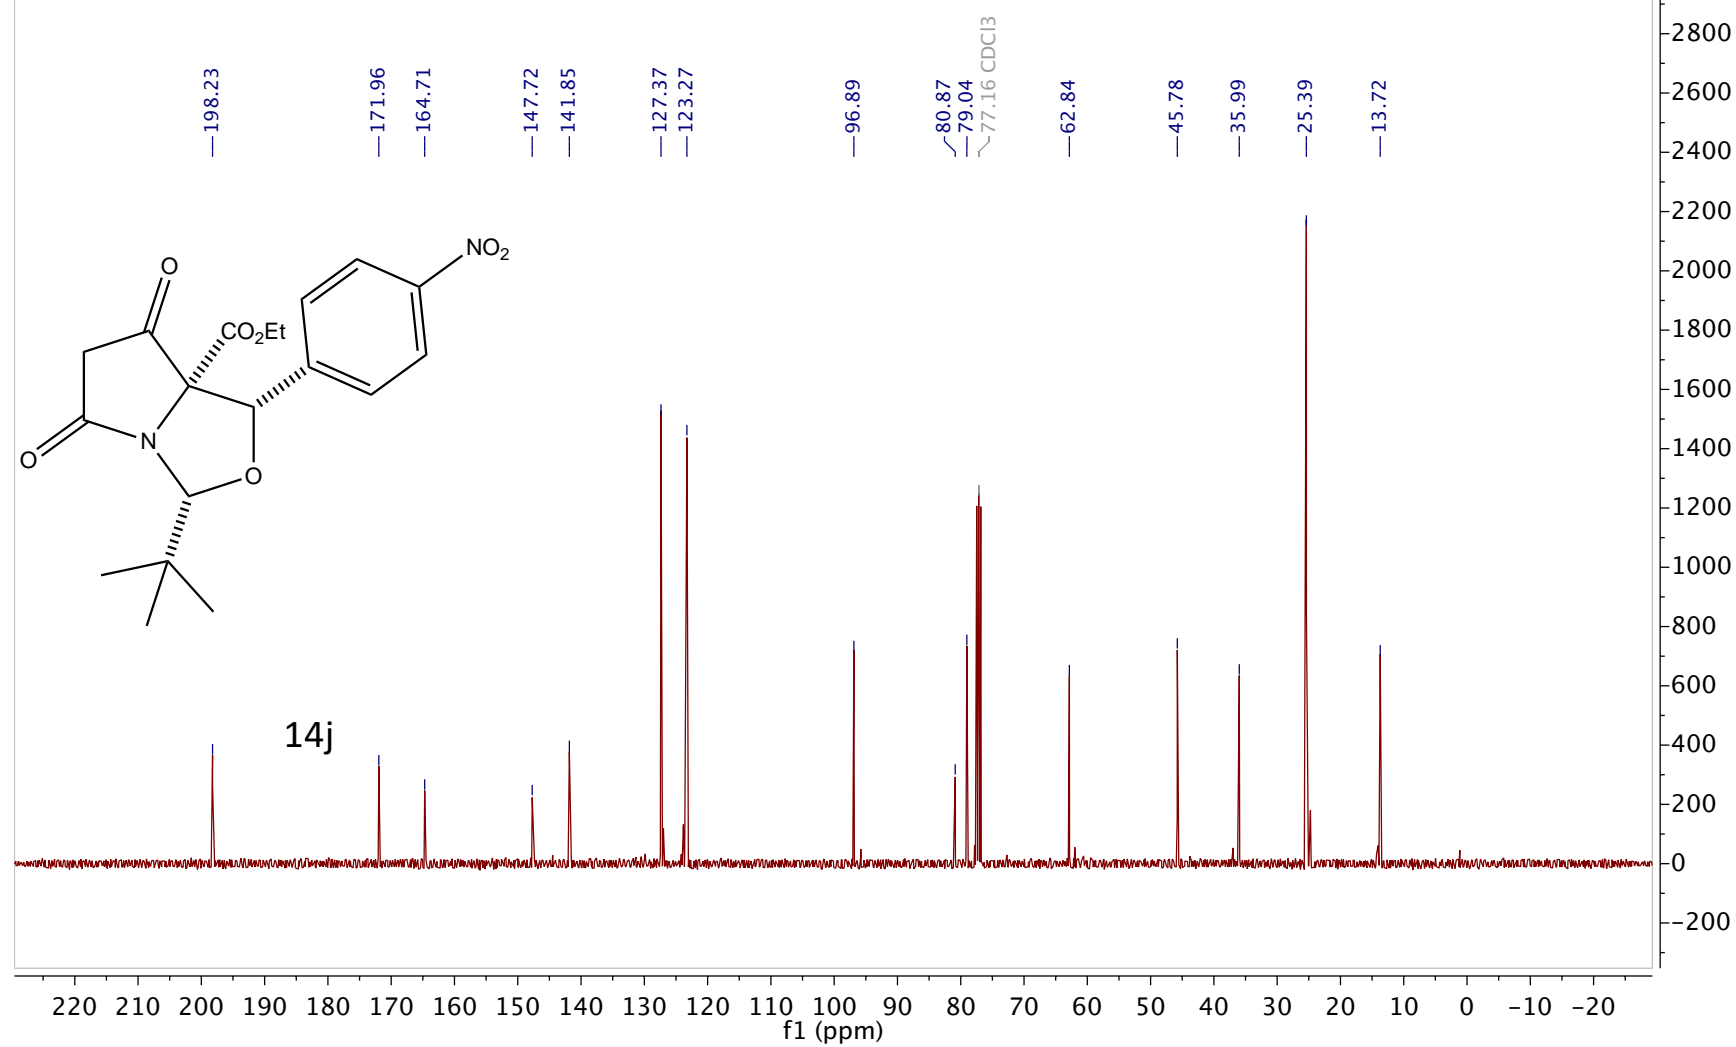

Feb25-2021-34-LS964(C).1.fid  
Instrument AVH400  
Group MGM  
Chemist Liban Saney  
Project Account Code DM7300  
h1acq.crl CDCl3 {C:\NMR} mgmgrp 34

<sup>1</sup>H NMR (400 MHz, CDCl<sub>3</sub>)

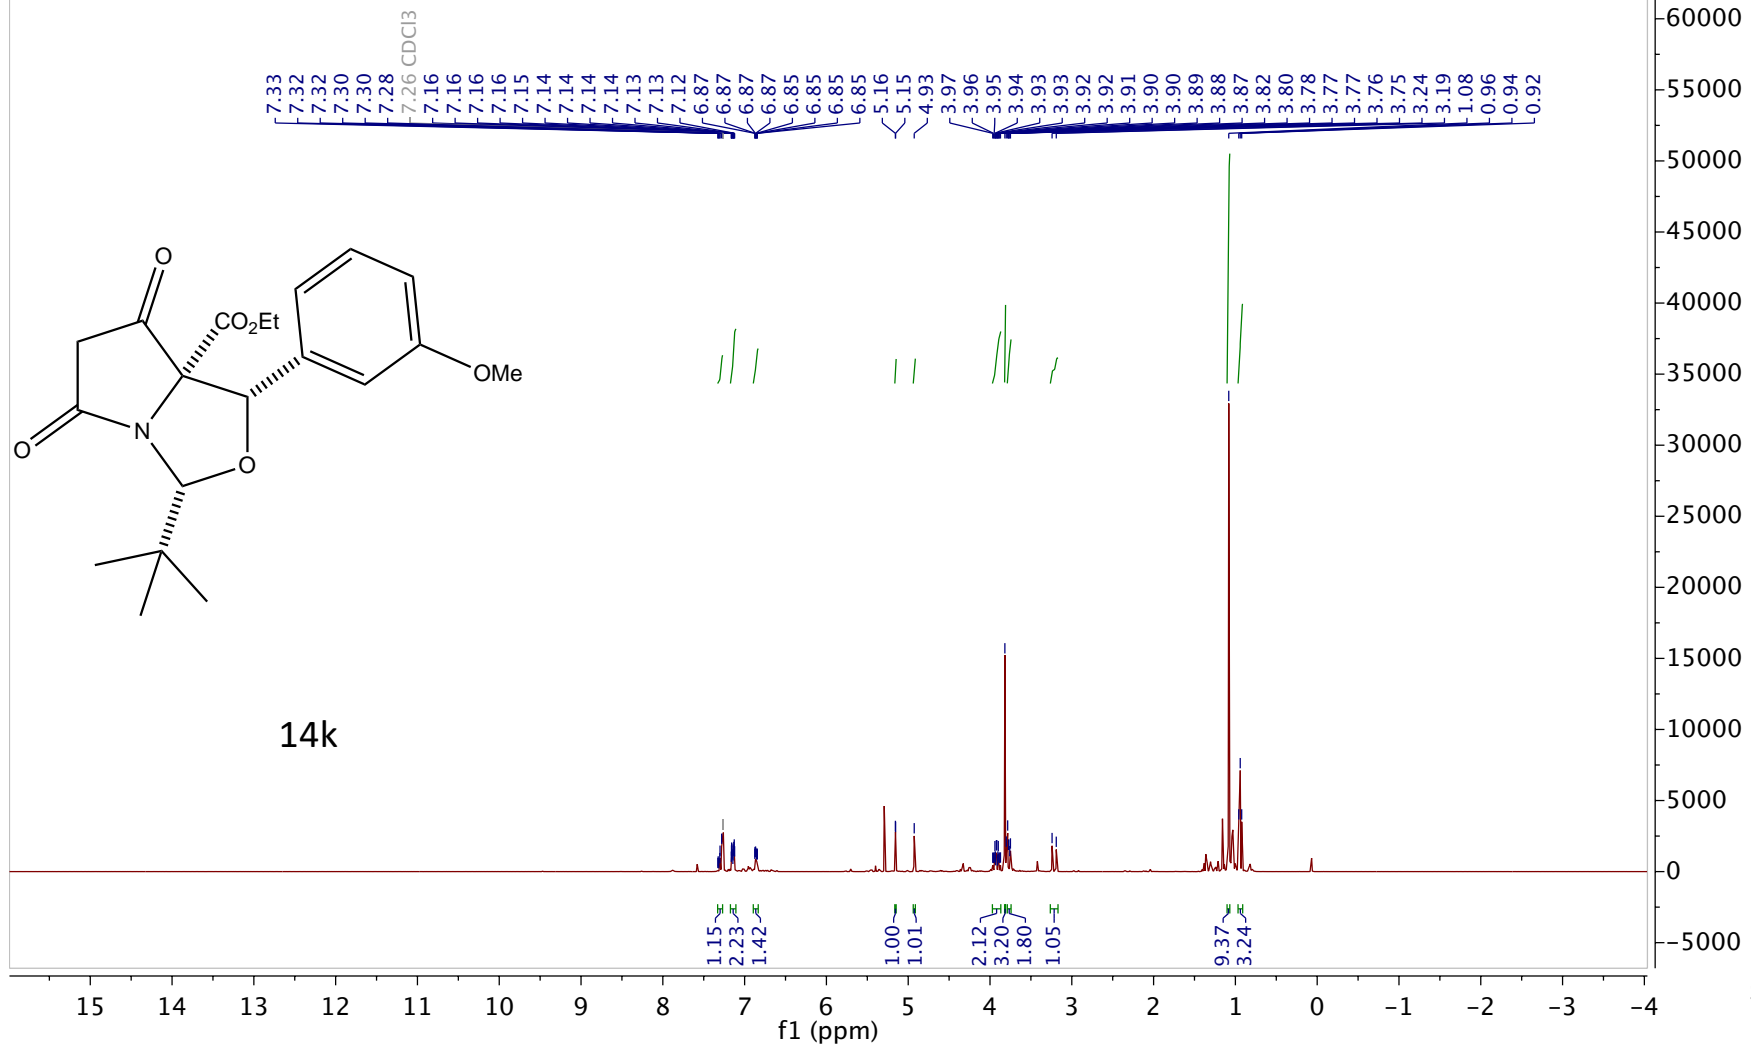



Feb25-2021-34-LS964(C).4.fid  
Instrument AVH400  
Group MGM  
Chemist Liban Saney  
Project Account Code DM7300  
c13acq\_512.crl CDCl3 {C:\NMR} mgmgrp 34

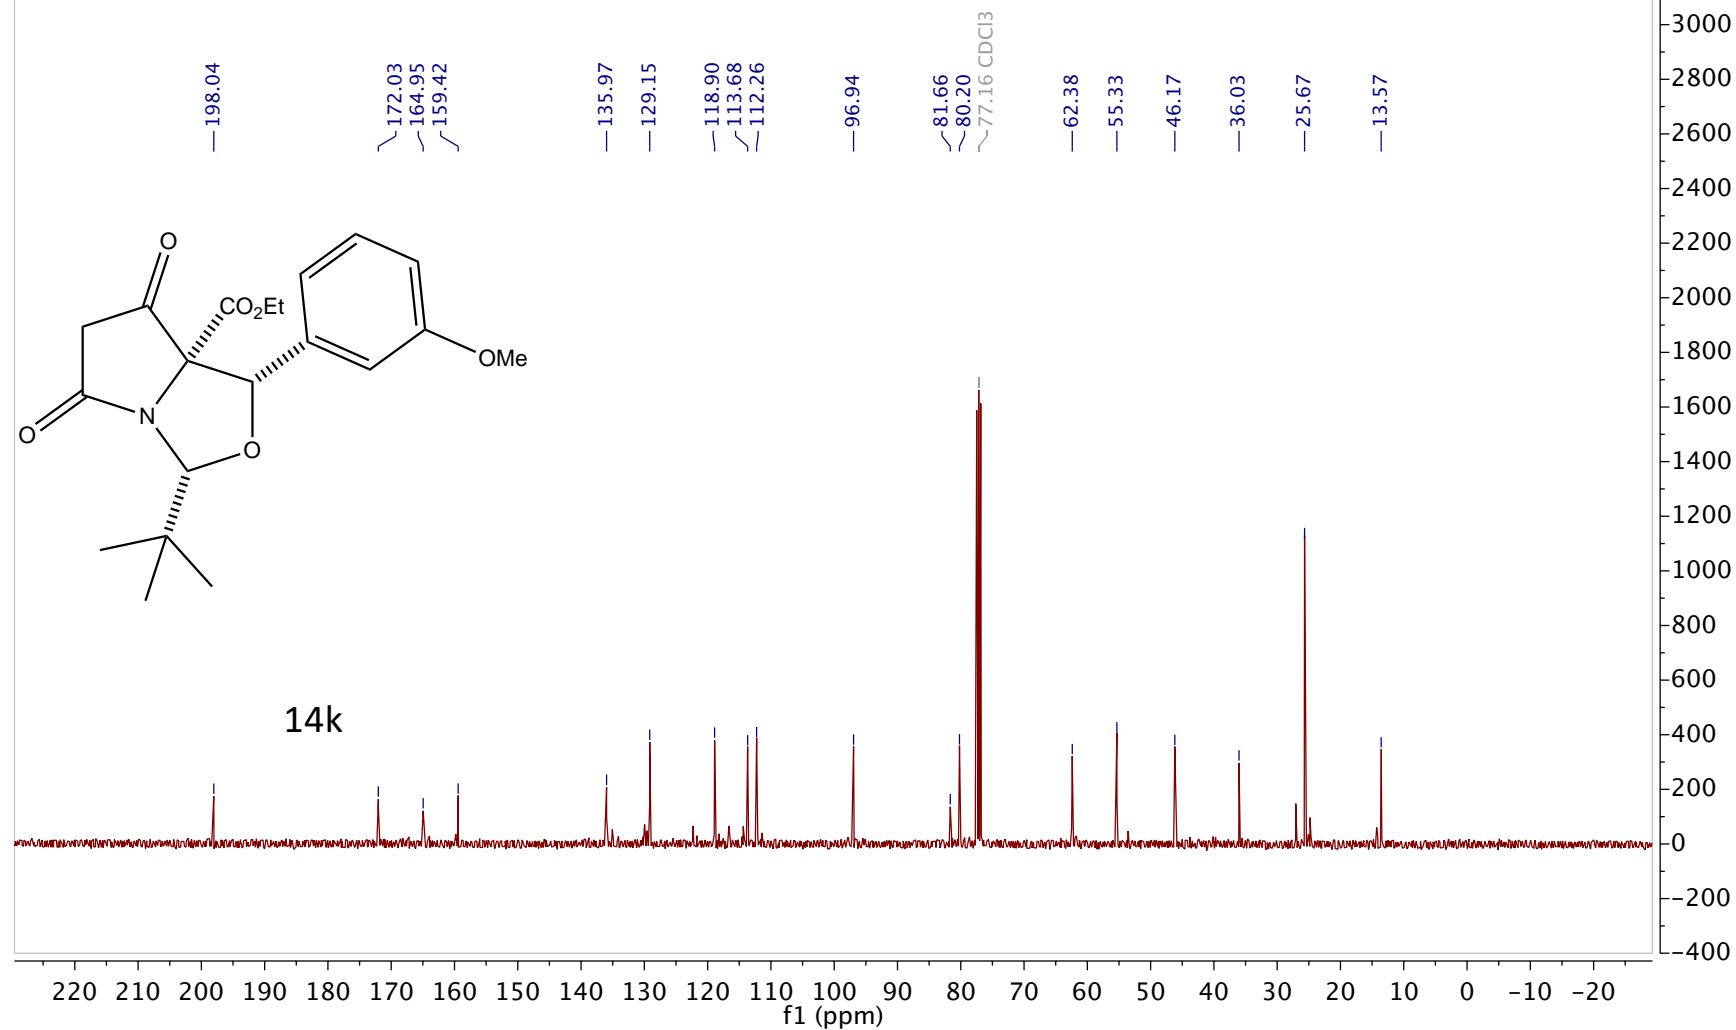

Feb27-2021-15-LS966(C).1.fid  
Instrument AVH400  
Group MGM  
Chemist Liban Saney  
Project Account Code DM7300  
h1acq.crl CDCl3 {C:\NMR} mgmgrp 15

<sup>1</sup>H NMR (400 MHz, CDCl<sub>3</sub>)

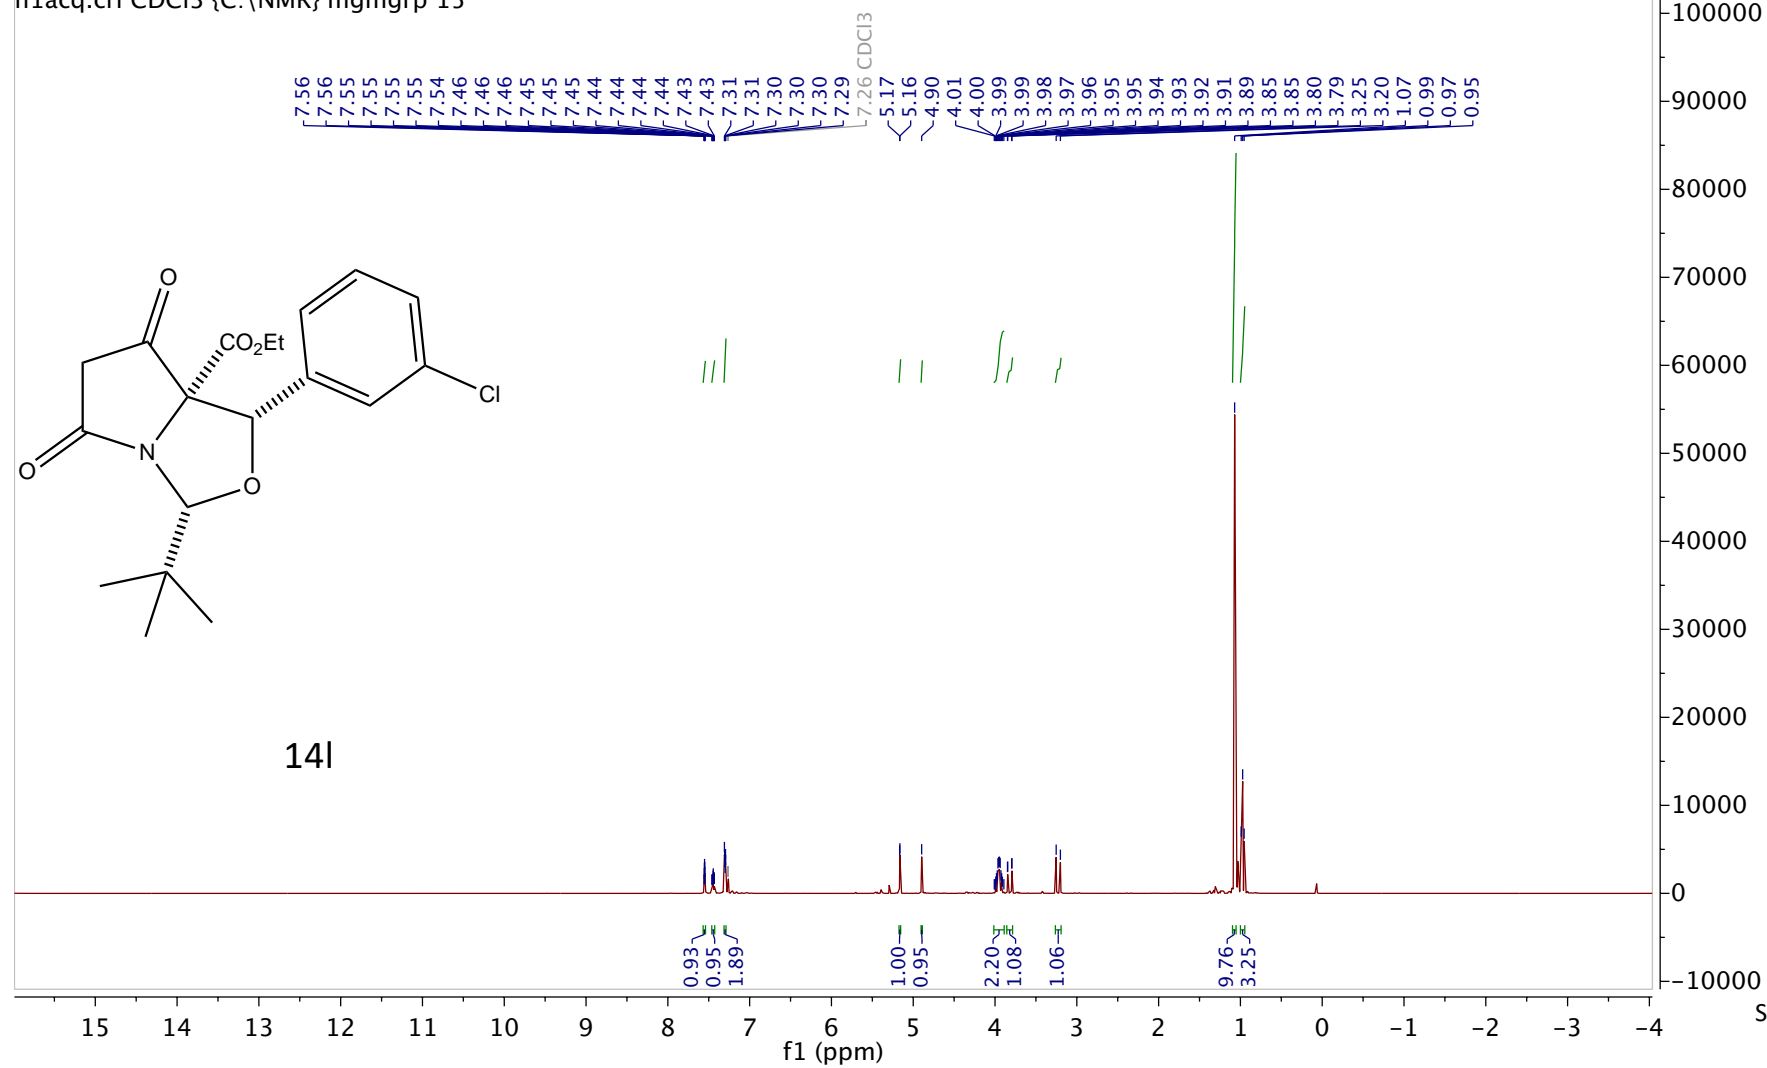

Feb27-2021-15-LS966(C).4.fid  
Instrument AVH400  
Group MGM  
Chemist Liban Saney  
Project Account Code DM7300  
c13acq\_512.crl CDCl3 {C:\NMR} mgmgrp 15

<sup>13</sup>C NMR (101 MHz, CDCl<sub>3</sub>)

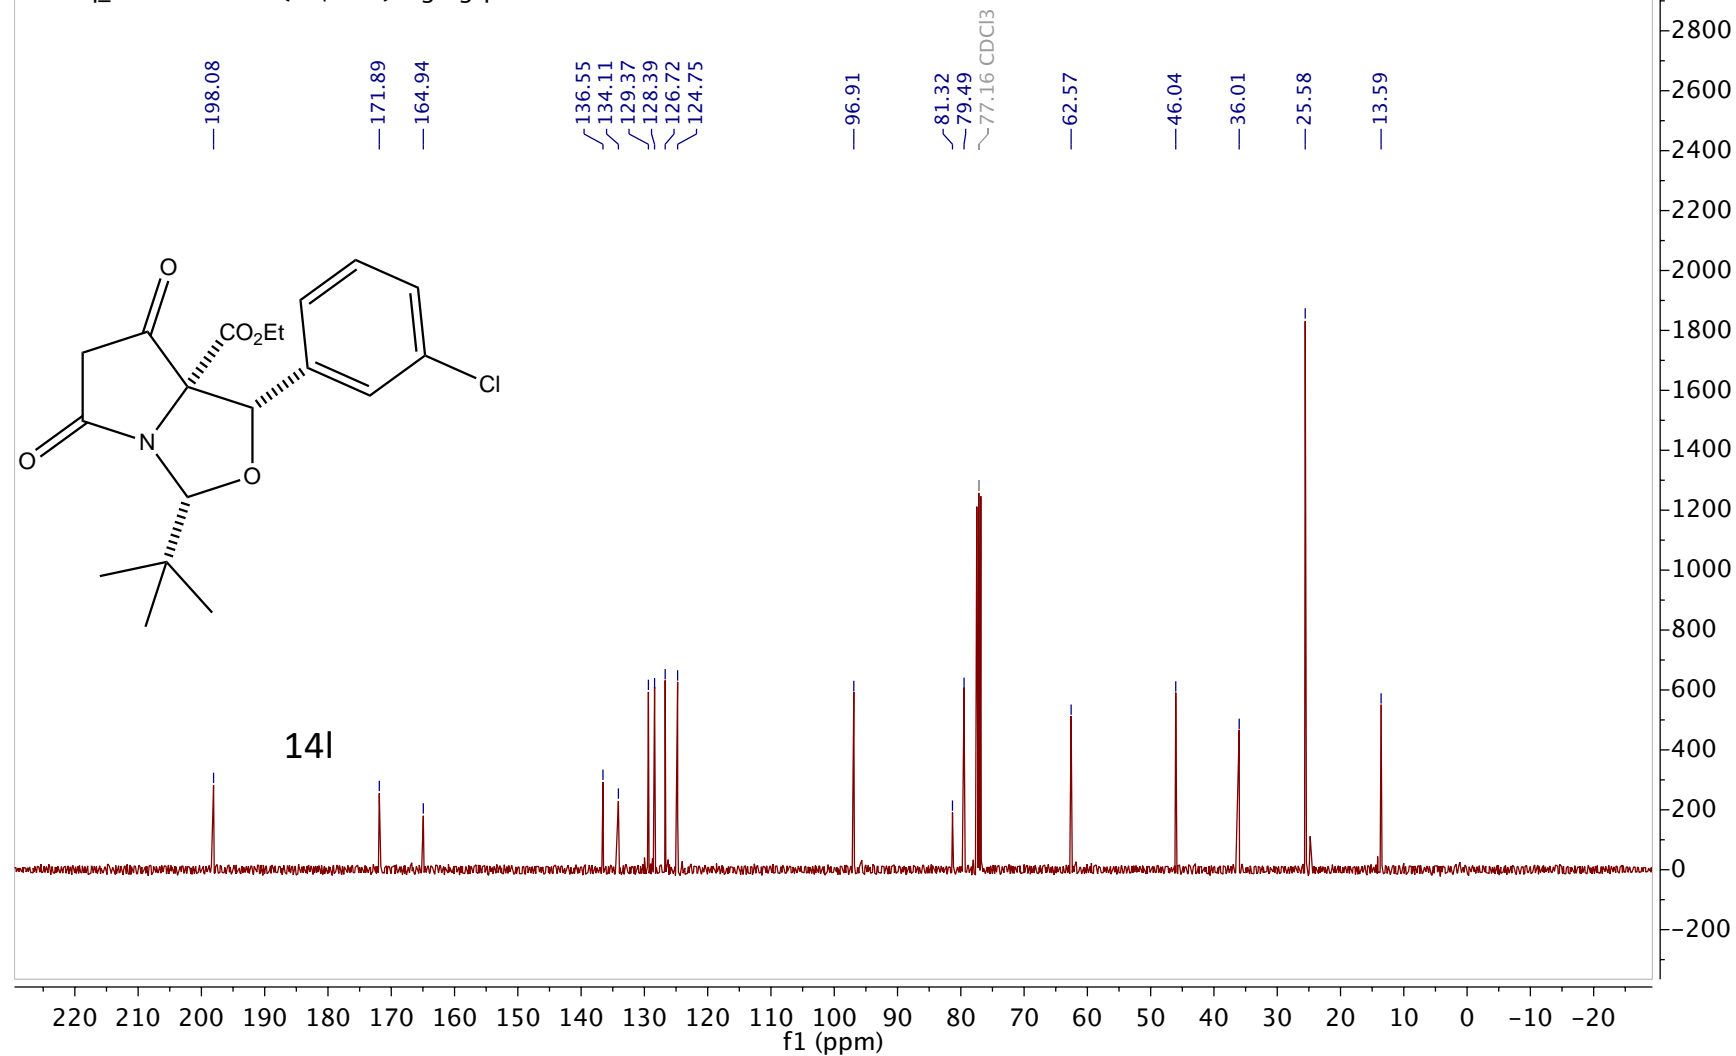

Feb27-2021-18-LS969(C).1.fid  
Instrument AVH400  
Group MGM  
Chemist Liban Saney  
Project Account Code DM7300  
h1acq.crl CDCl3 {C:\NMR} mgmgrp 18

<sup>1</sup>H NMR (400 MHz, CDCl<sub>3</sub>)

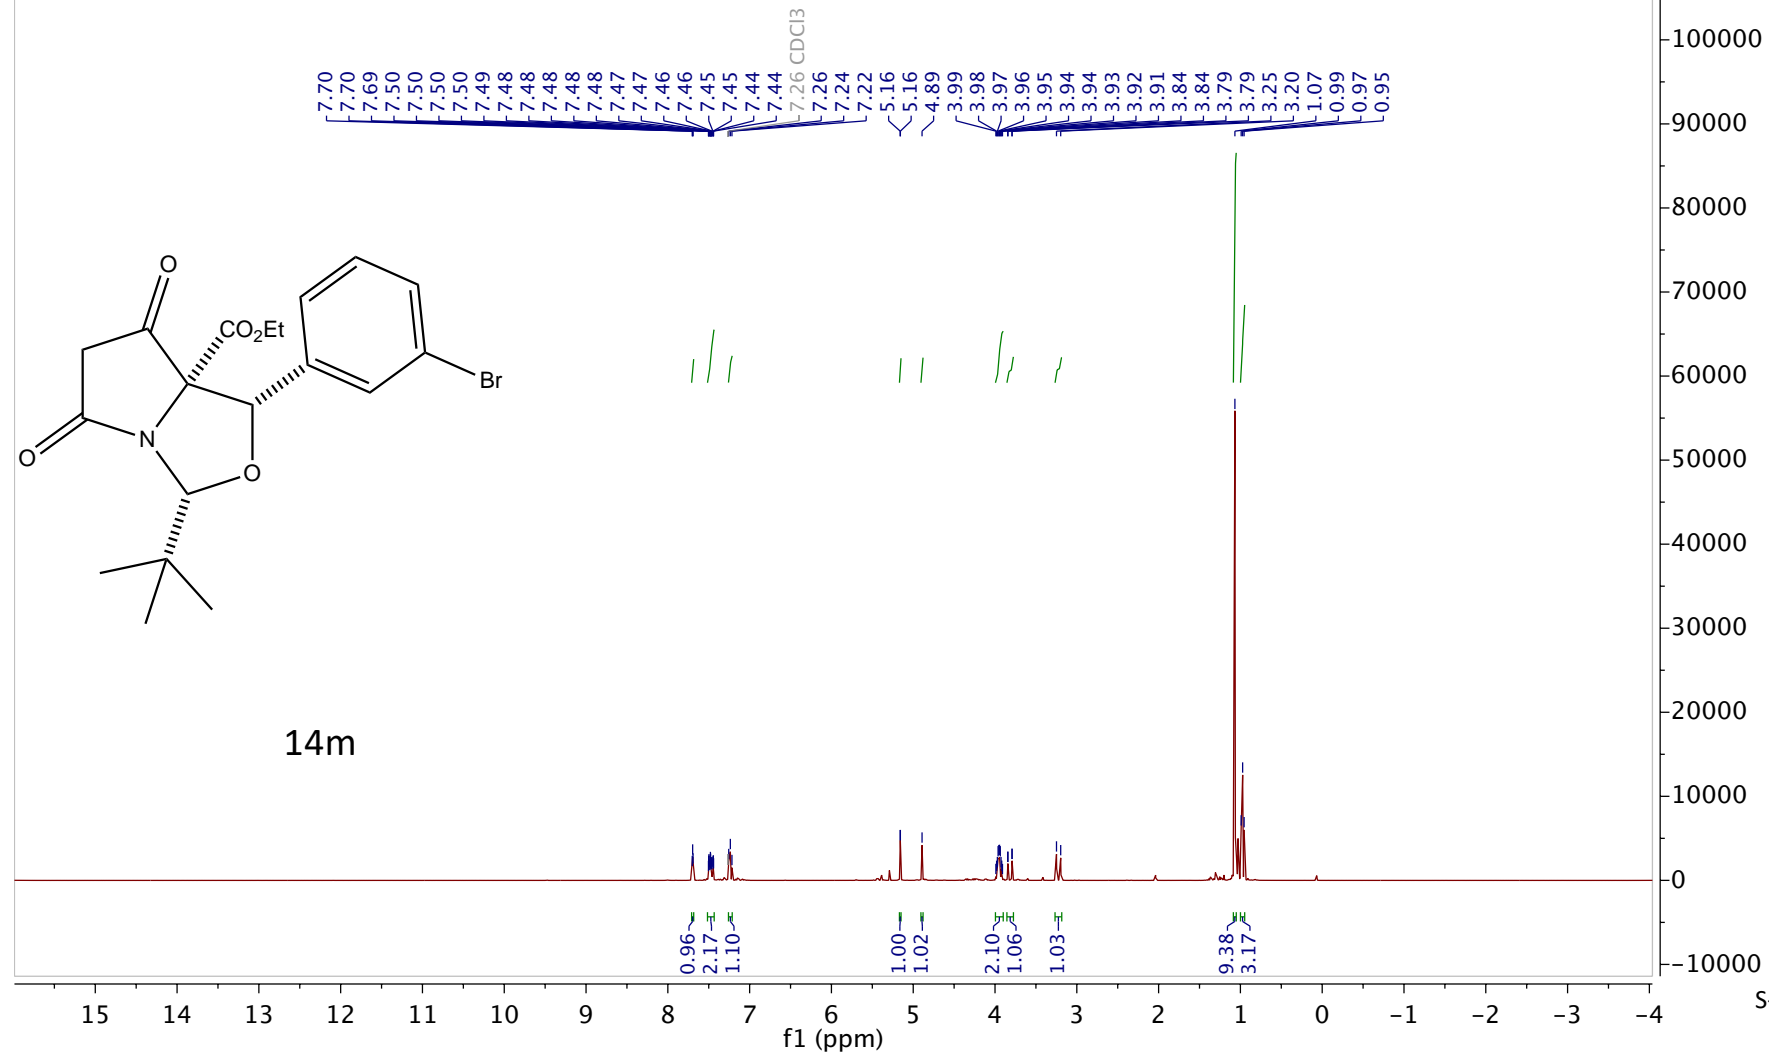

Feb27-2021-18-LS969(C).4.fid  
Instrument AVH400  
Group MGM  
Chemist Liban Saney  
Project Account Code DM7300  
c13acq\_512.crl CDCl3 {C:\NMR} mgmgrp 18

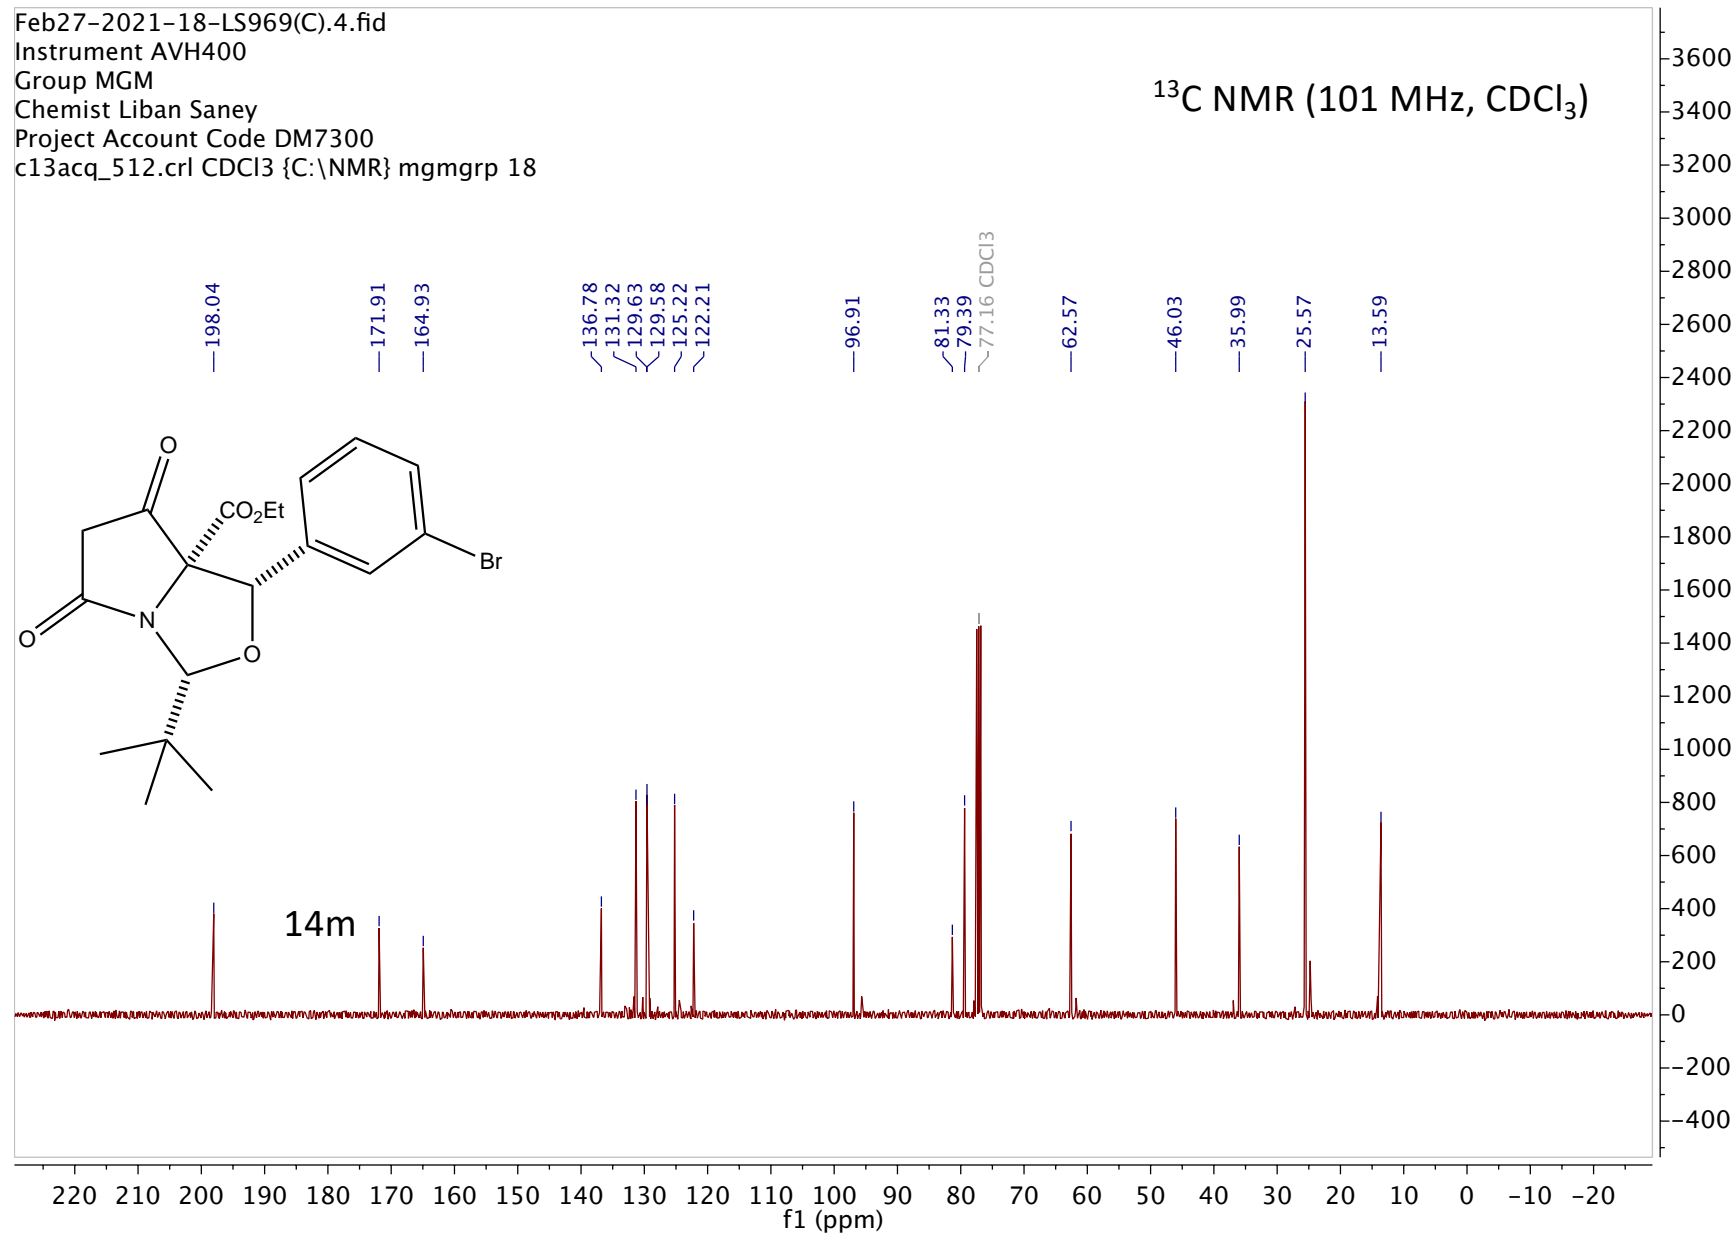

May23-2019-60-LS424(C).1.fid  
 Instrument AVF400  
 Chemist Liban Saney  
 Group MGM  
 Project Account Code DM7300  
 h1acq.crl CDCl3 {C:\NMR} mgmgrp 60

<sup>1</sup>H NMR (400 MHz, CDCl<sub>3</sub>)

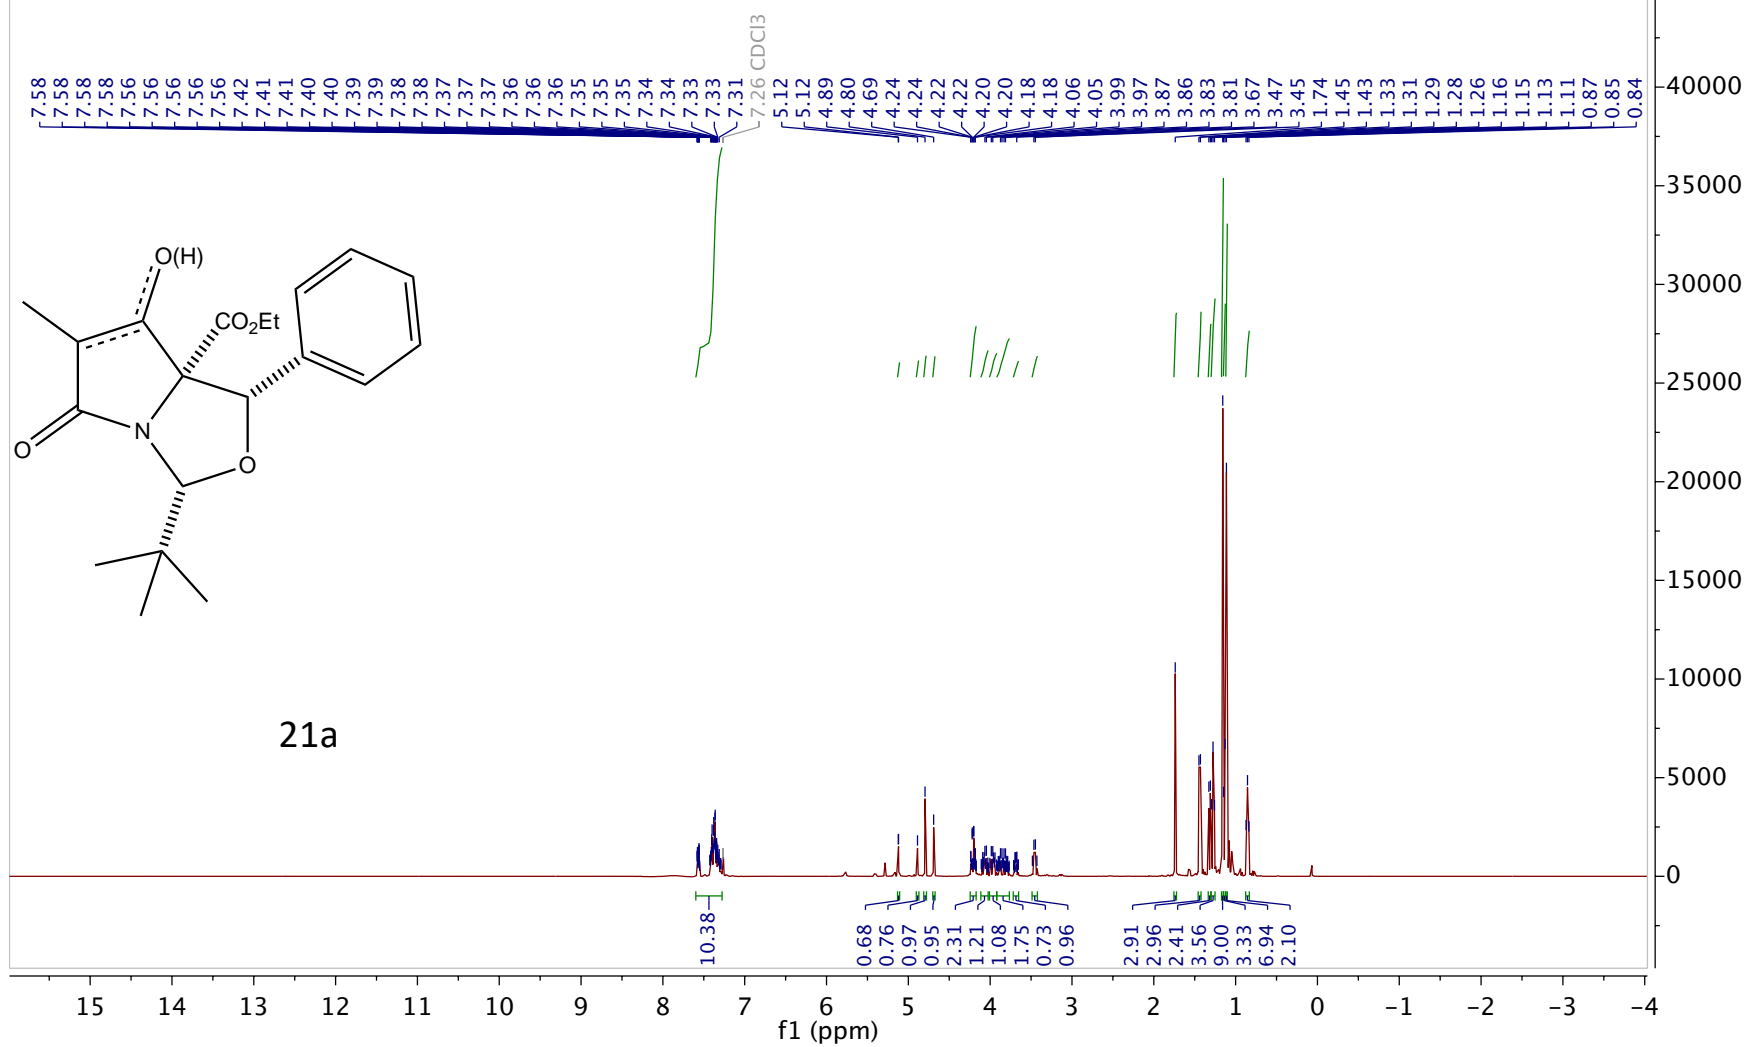

May23-2019-60-LS424(C).4.fid  
Instrument AVF400  
Chemist Liban Saney  
Group MGM  
Project Account Code DM7300  
c13acq\_512.crl CDCl3 {C:\NMR} mgmgrp 60

<sup>13</sup>C NMR (101 MHz, CDCl<sub>3</sub>)

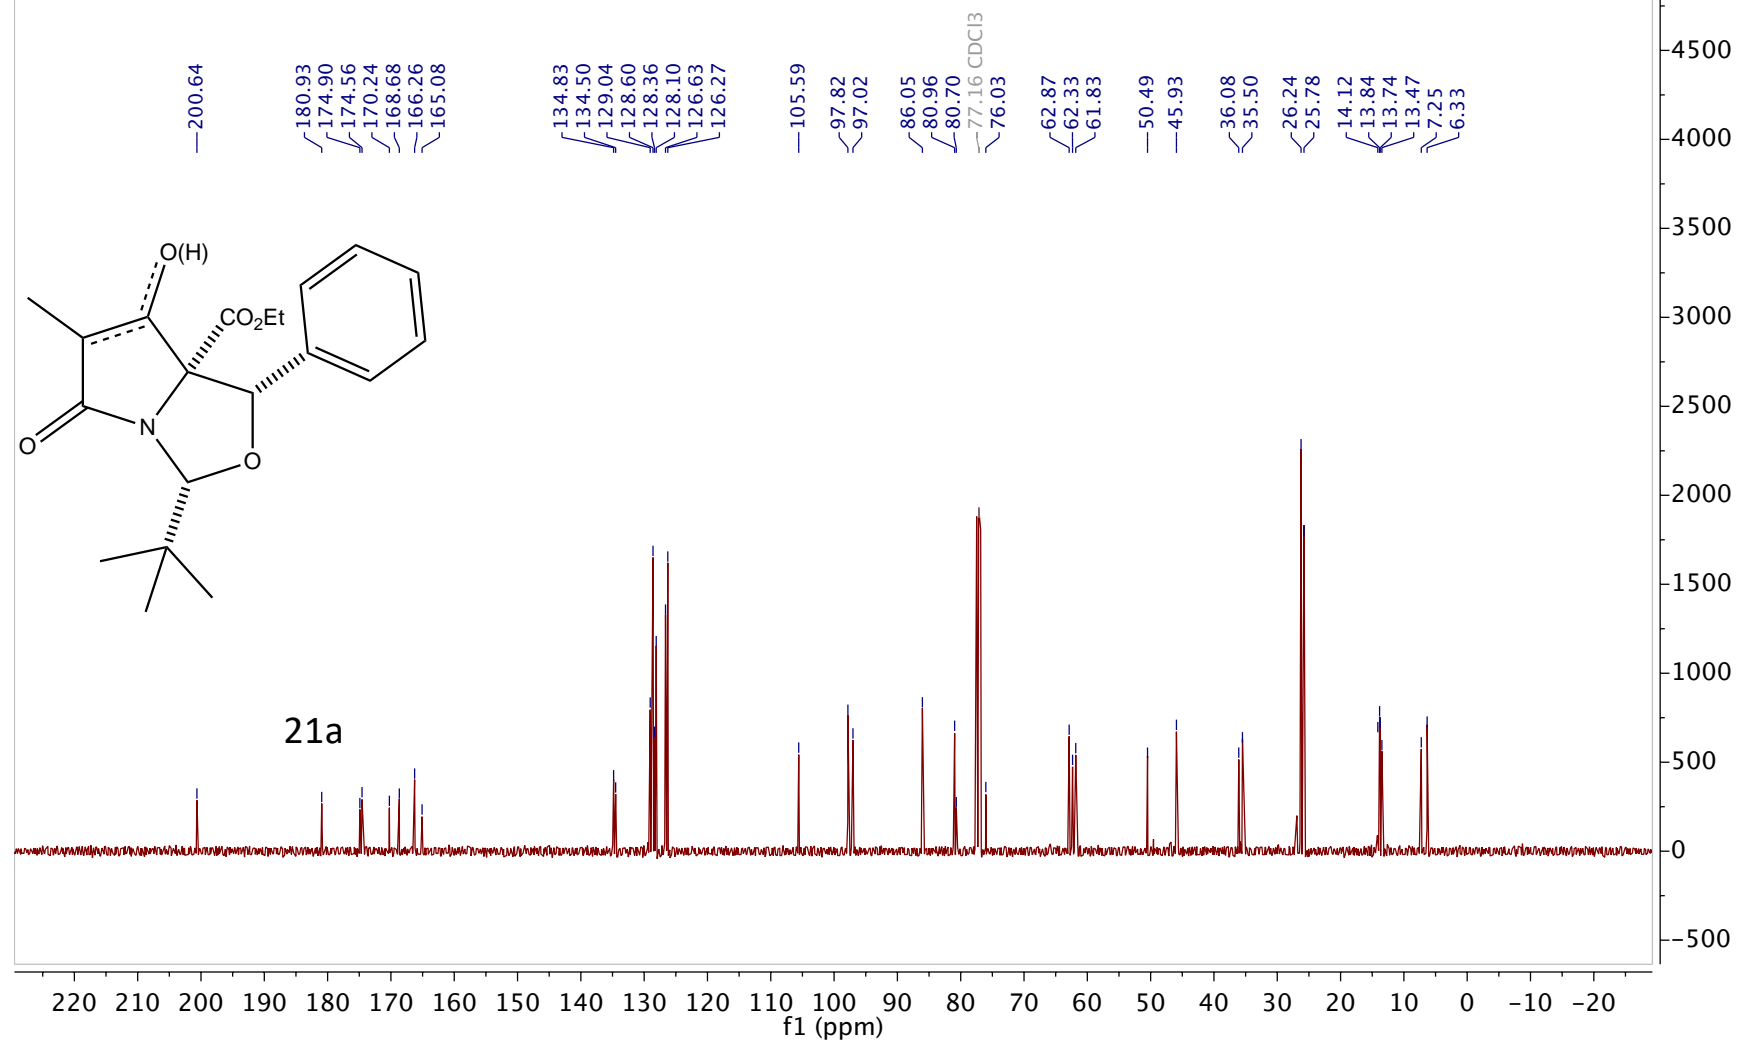

Jul16-2019-60-LS458(C).1.fid  
Instrument AVF400  
Chemist Liban Saney  
Group MGM  
Project Account Code DM7300  
h1acq.crl CDCl3 {C:\NMR} mgmgrp 60

<sup>1</sup>H NMR (400 MHz, CDCl<sub>3</sub>)

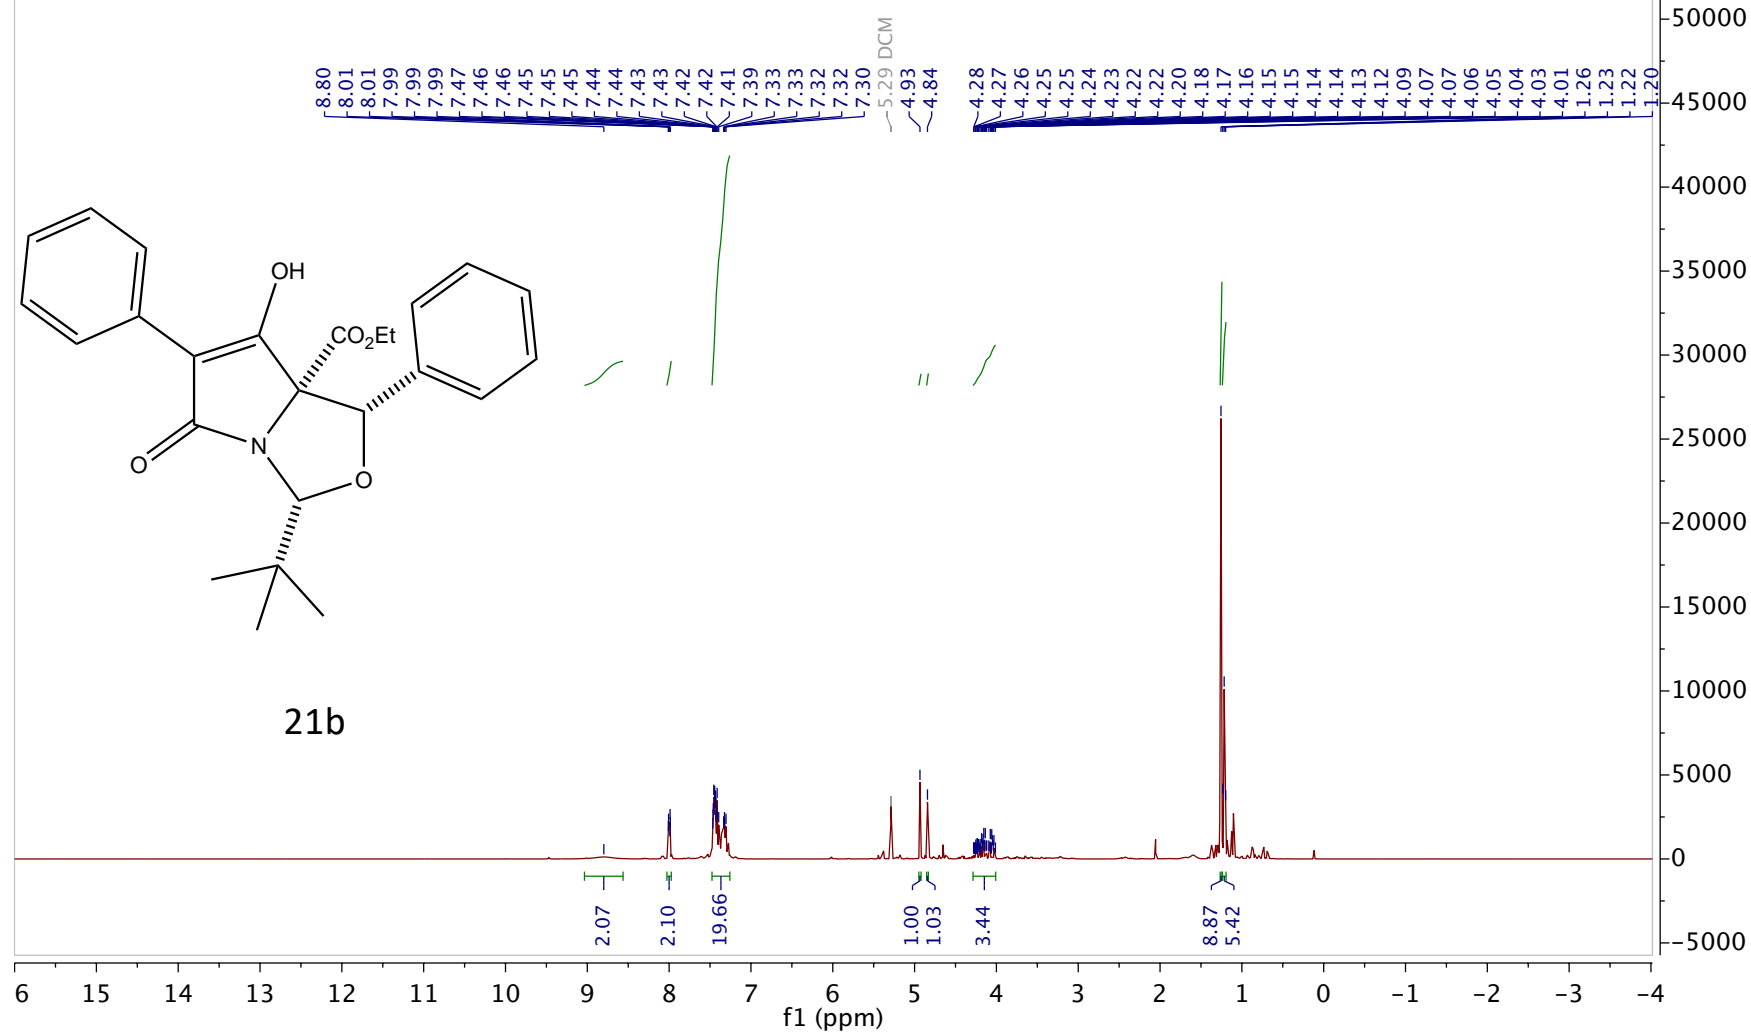



Jul16-2019-60-LS458(C).4.fid  
Instrument AVF400  
Chemist Liban Saney  
Group MGM  
Project Account Code DM7300  
c13acq\_512.crl CDCl3 {C:\NMR} mgmgrp 60

<sup>13</sup>C NMR (101 MHz, CDCl<sub>3</sub>)

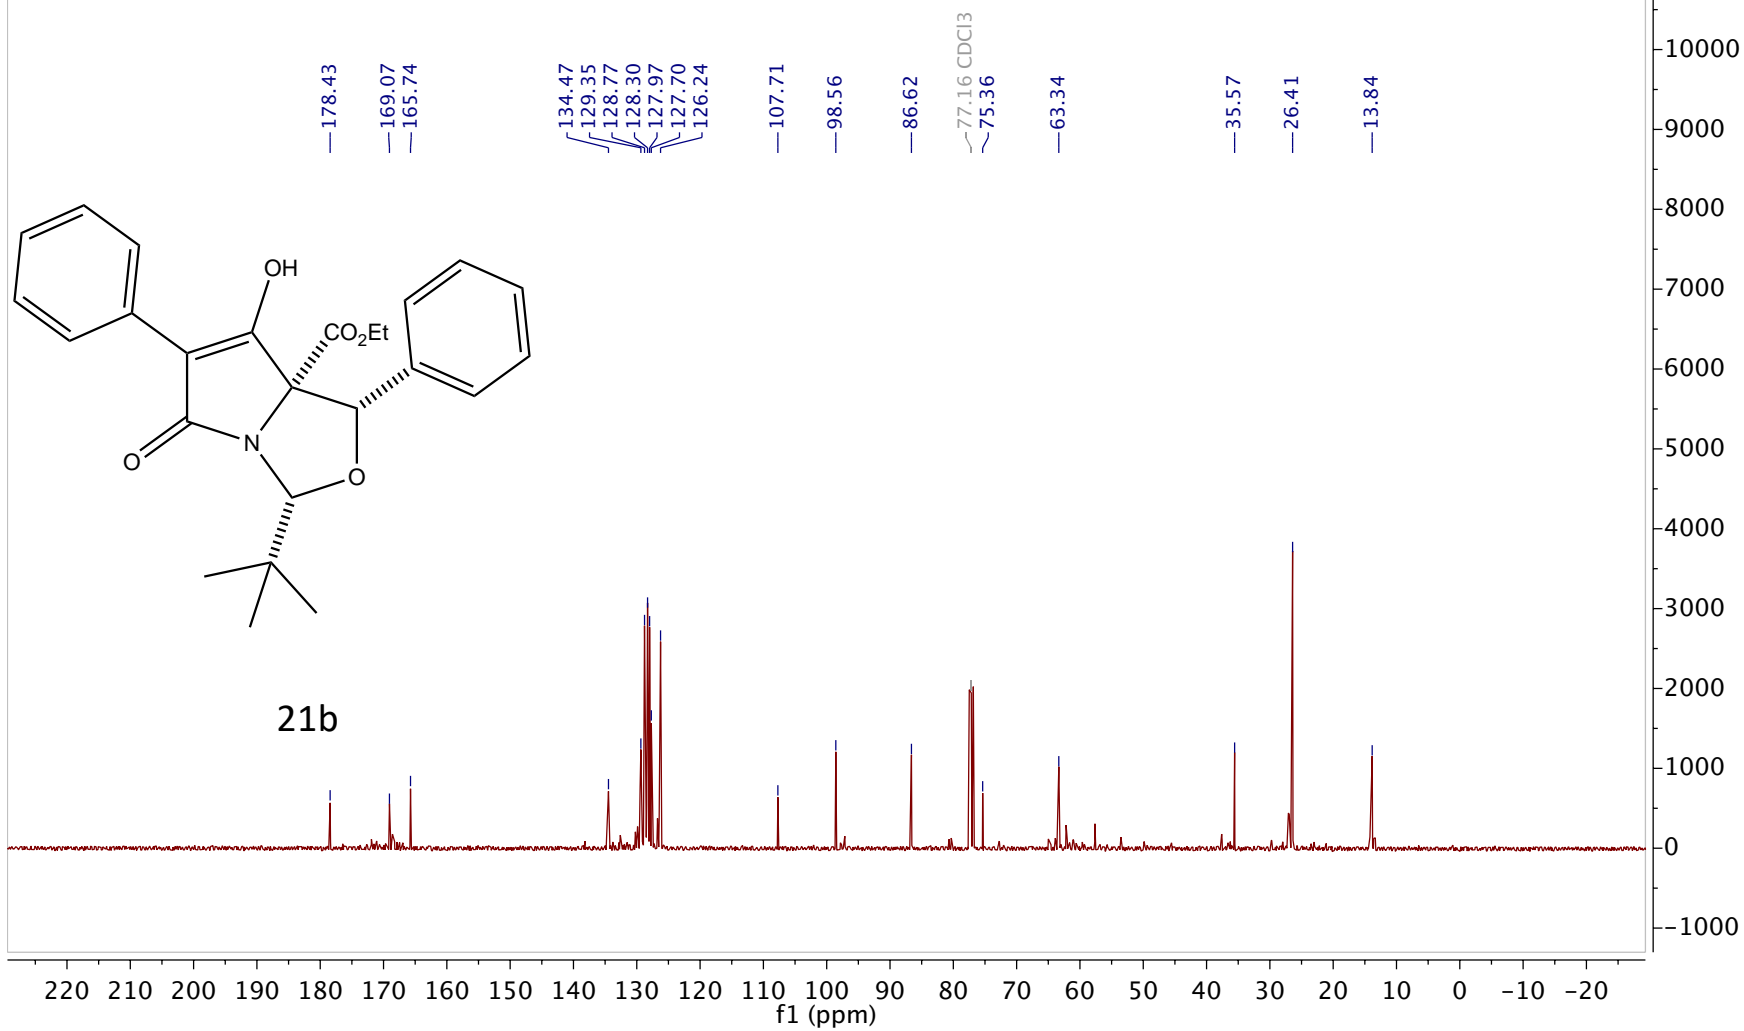

Jul03-2019-60-LS442(P) H2-I9.1.fid  
Instrument AVF400  
Chemist Liban Saney  
Group MGM  
Project Account Code DM7300  
h1acq.crl CDCl3 {C:\NMR} mgmgrp 60

<sup>1</sup>H NMR (400 MHz, CDCl<sub>3</sub>)

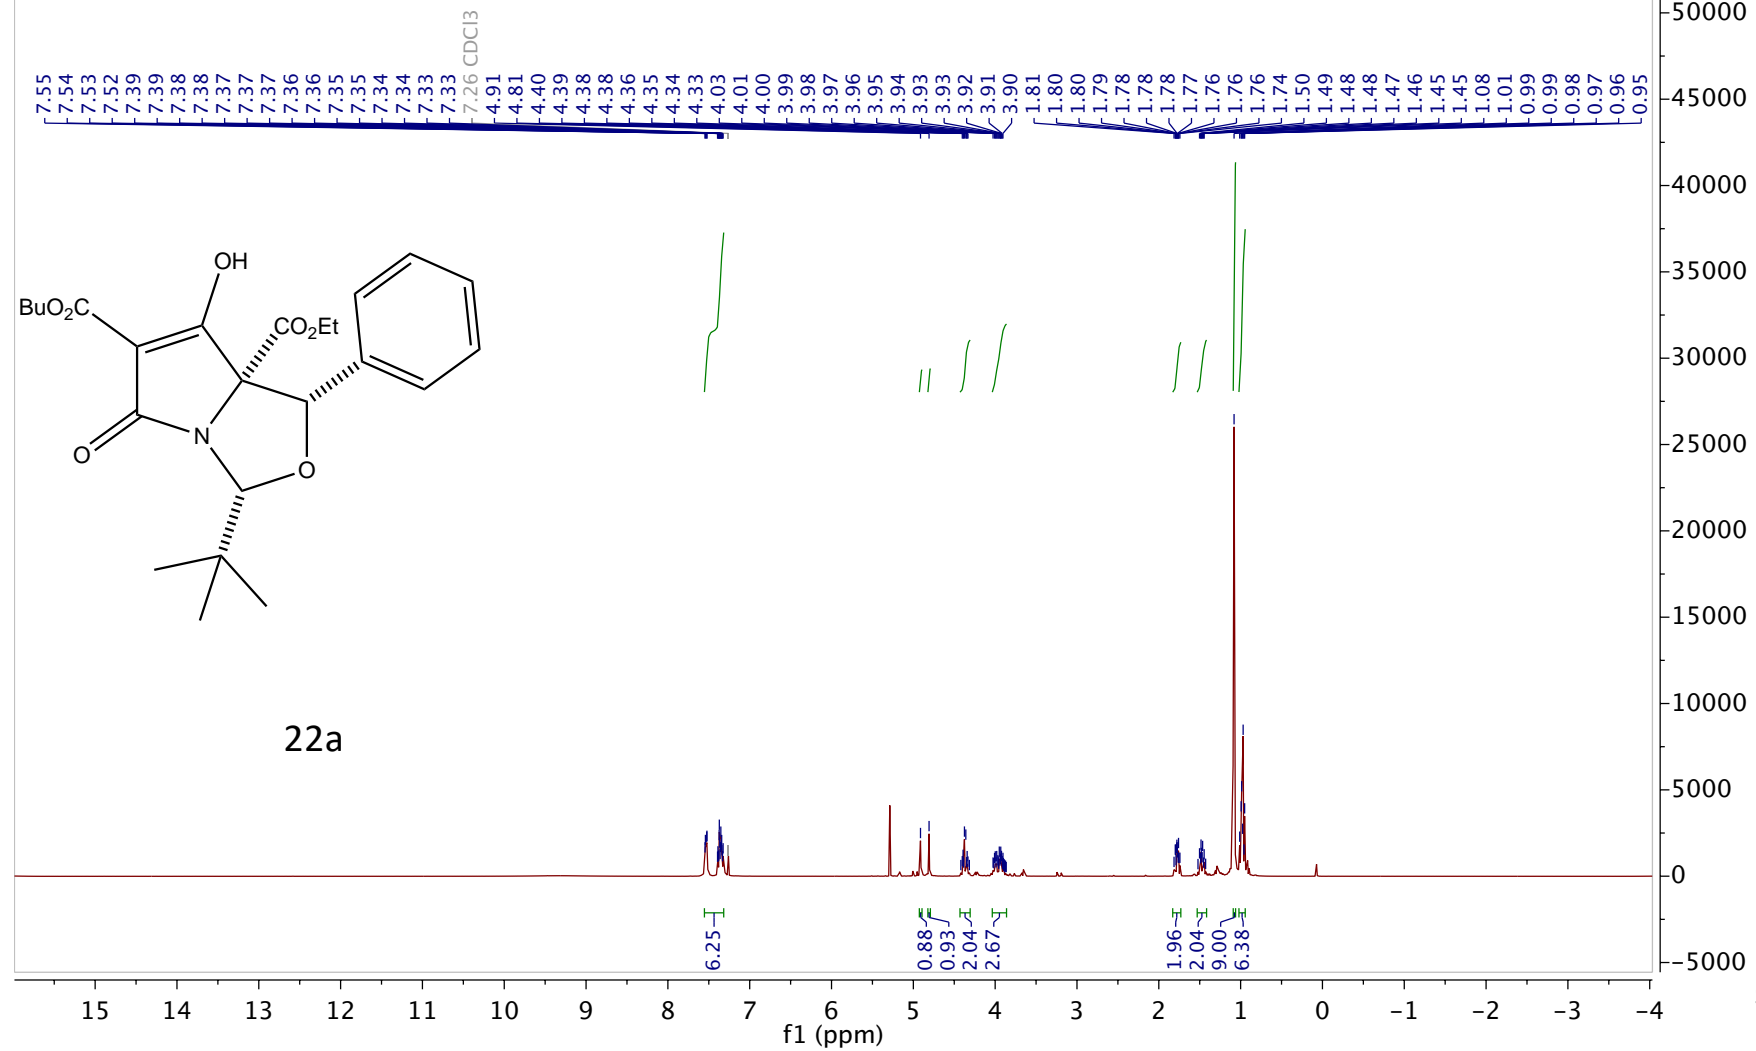

Jul03-2019-60-LS442(P) H2-I9.4.fid  
Instrument AVF400  
Chemist Liban Saney  
Group MGM  
Project Account Code DM7300  
c13acq\_512.crl CDCl3 {C:\NMR} mgmgrp 60

<sup>13</sup>C NMR (101 MHz, CDCl<sub>3</sub>)

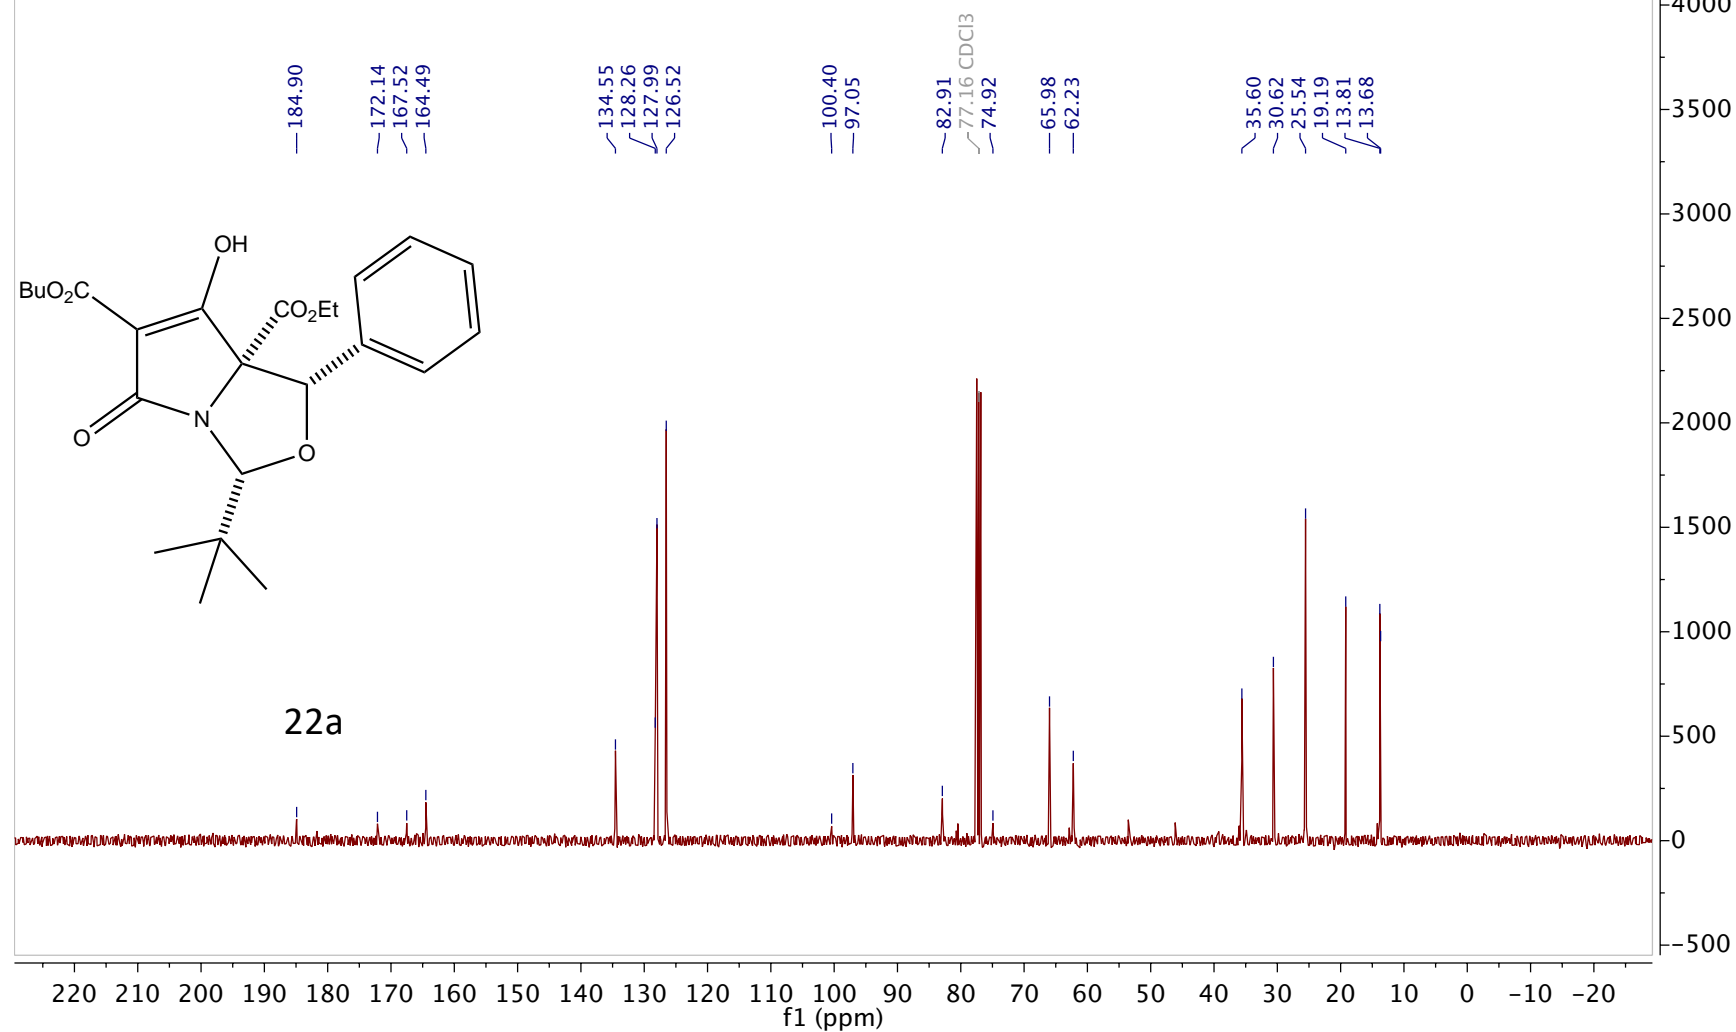

Oct01-2019-60-LS552(P) D7-E6.1.fid  
Instrument AVF400  
Chemist Liban Saney  
Group MGM  
Project Account Code DM7300  
h1acq.crl CDCl3 {C:\NMR} mgmgrp 60

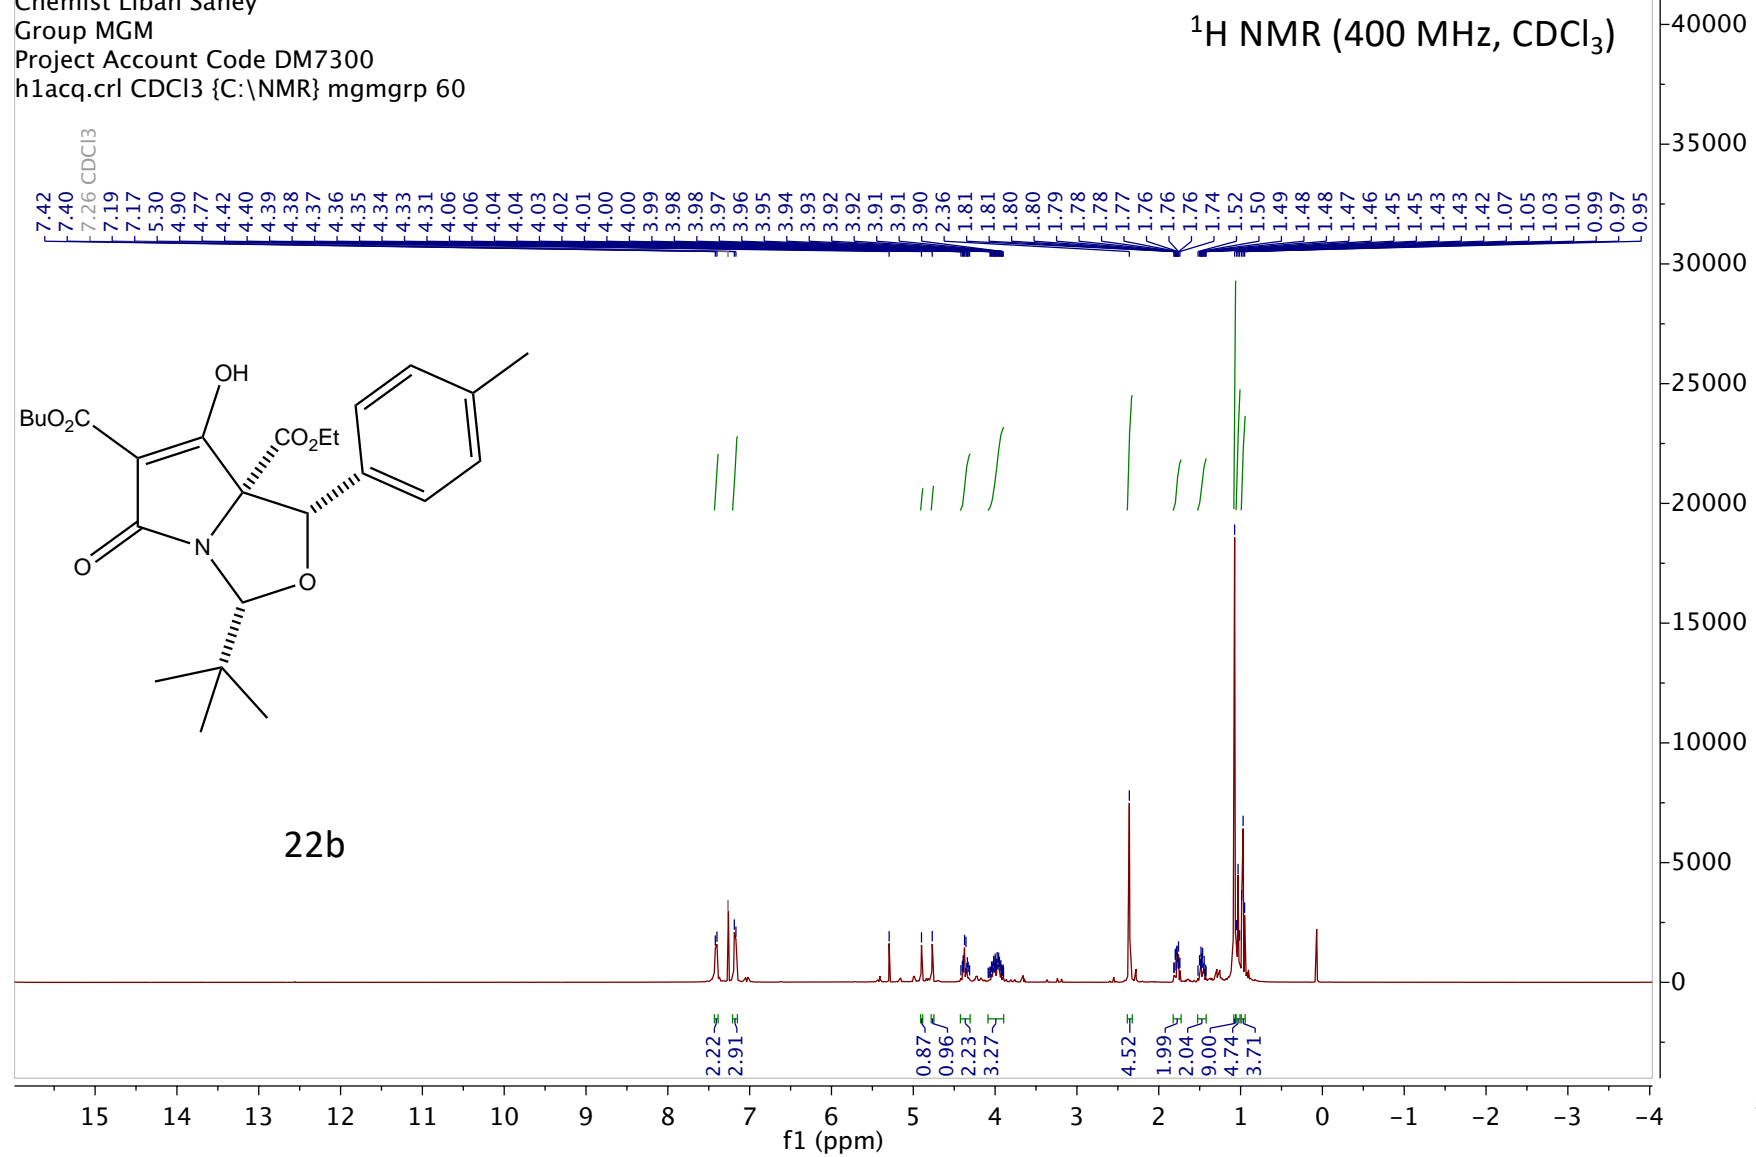

Oct01-2019-60-LS552(P) D7-E6.4.fid  
Instrument AVF400  
Chemist Liban Saney  
Group MGM  
Project Account Code DM7300  
c13acq\_512.crl CDCl3 {C:\NMR} mgmgrp 60

$^{13}\text{C}$  NMR (101 MHz,  $\text{CDCl}_3$ )

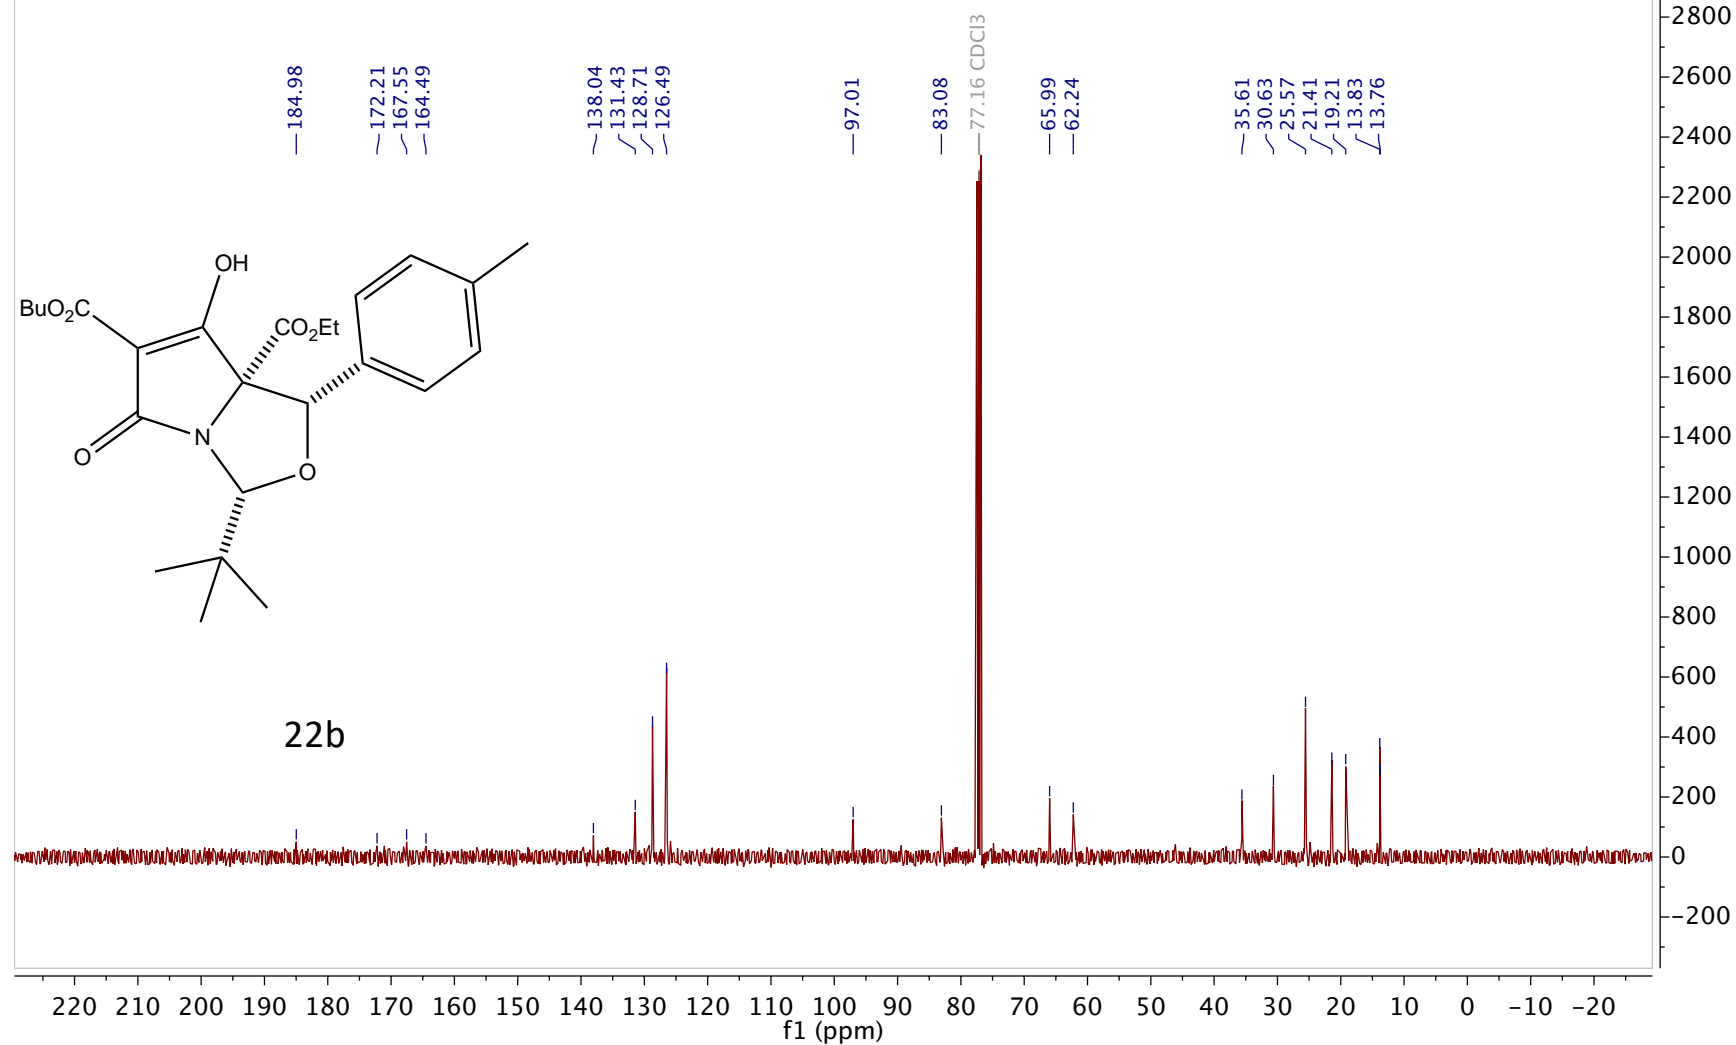

Oct17-2019-60-LS559(P) C6-E3.1.fid  
Instrument AVF400  
Chemist Liban Saney  
Group MGM  
Project Account Code DM7300  
h1acq.crl CDCl3 {C:\NMR} mgmgrp 60

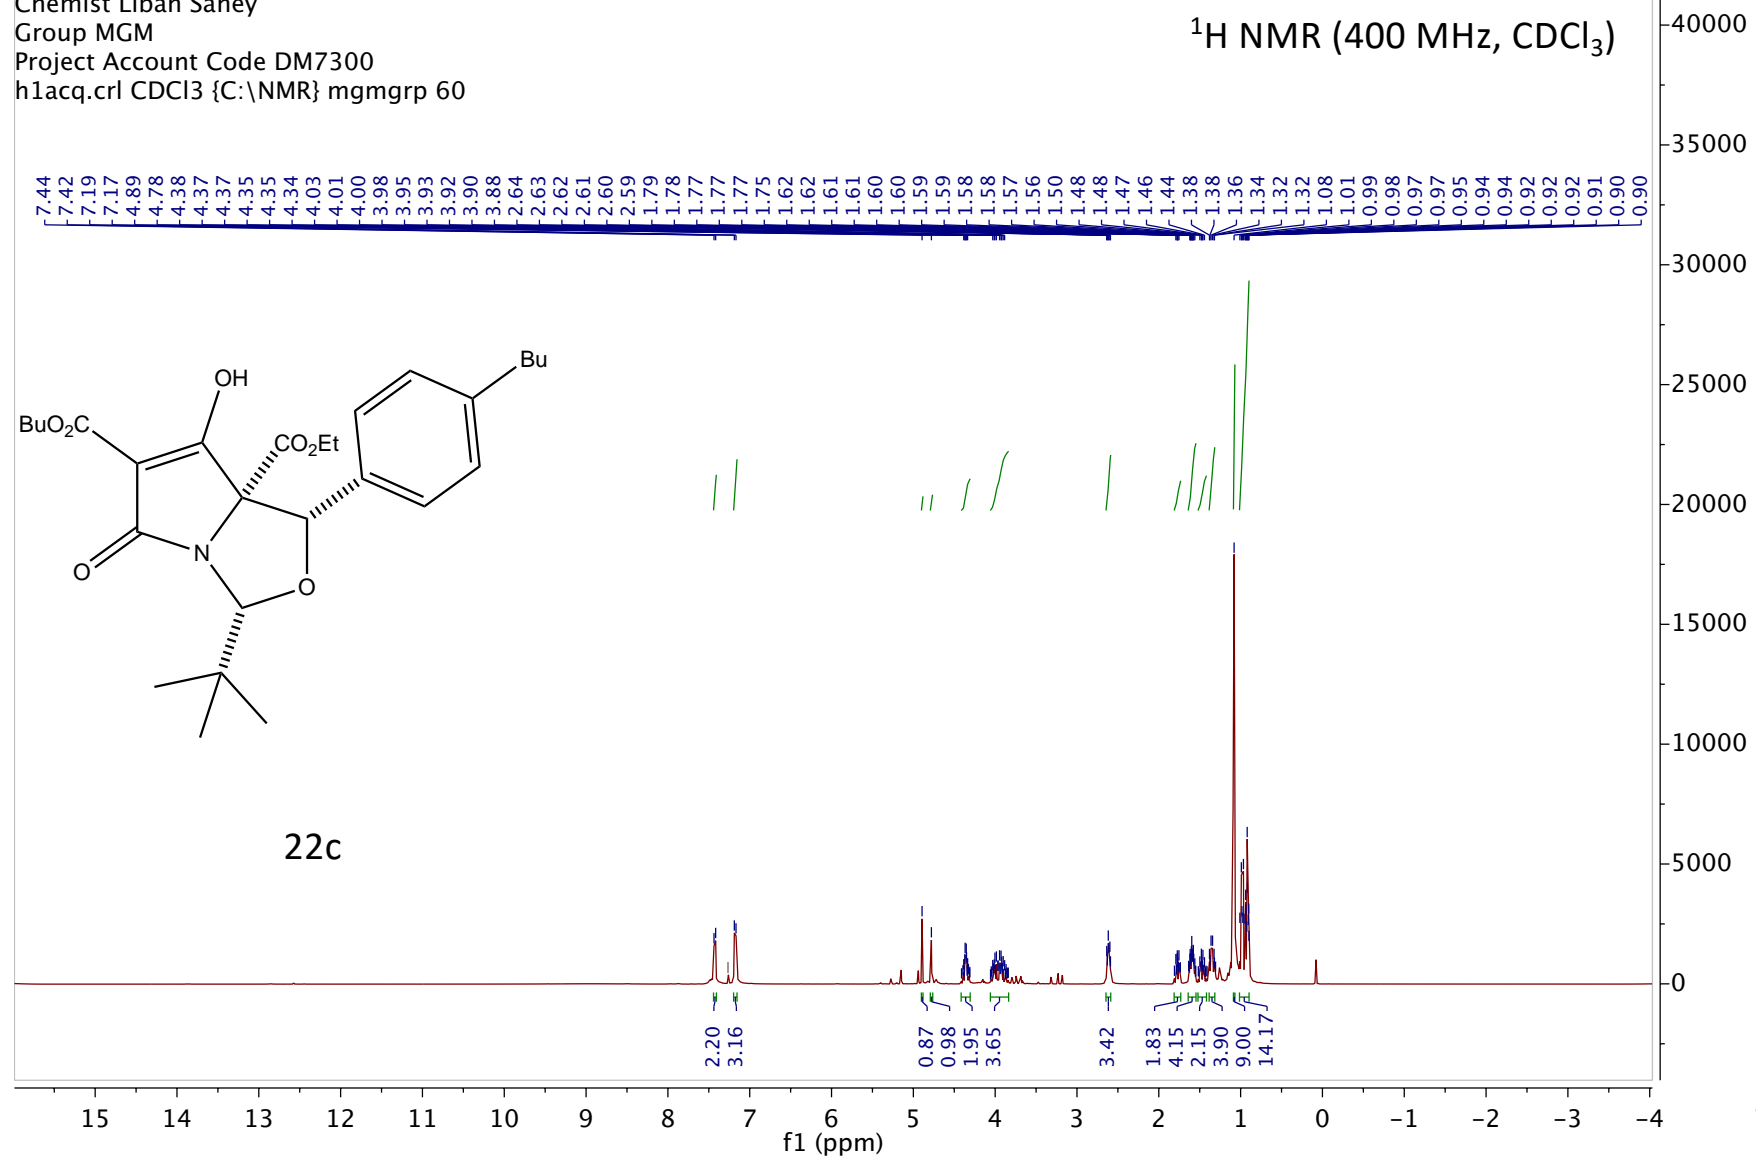

Oct17-2019-60-LS559(P) C6-E3.4.fid  
Instrument AVF400  
Chemist Liban Saney  
Group MGM  
Project Account Code DM7300  
c13acq\_512.crl CDCl3 {C:\NMR} mgmgrp 60

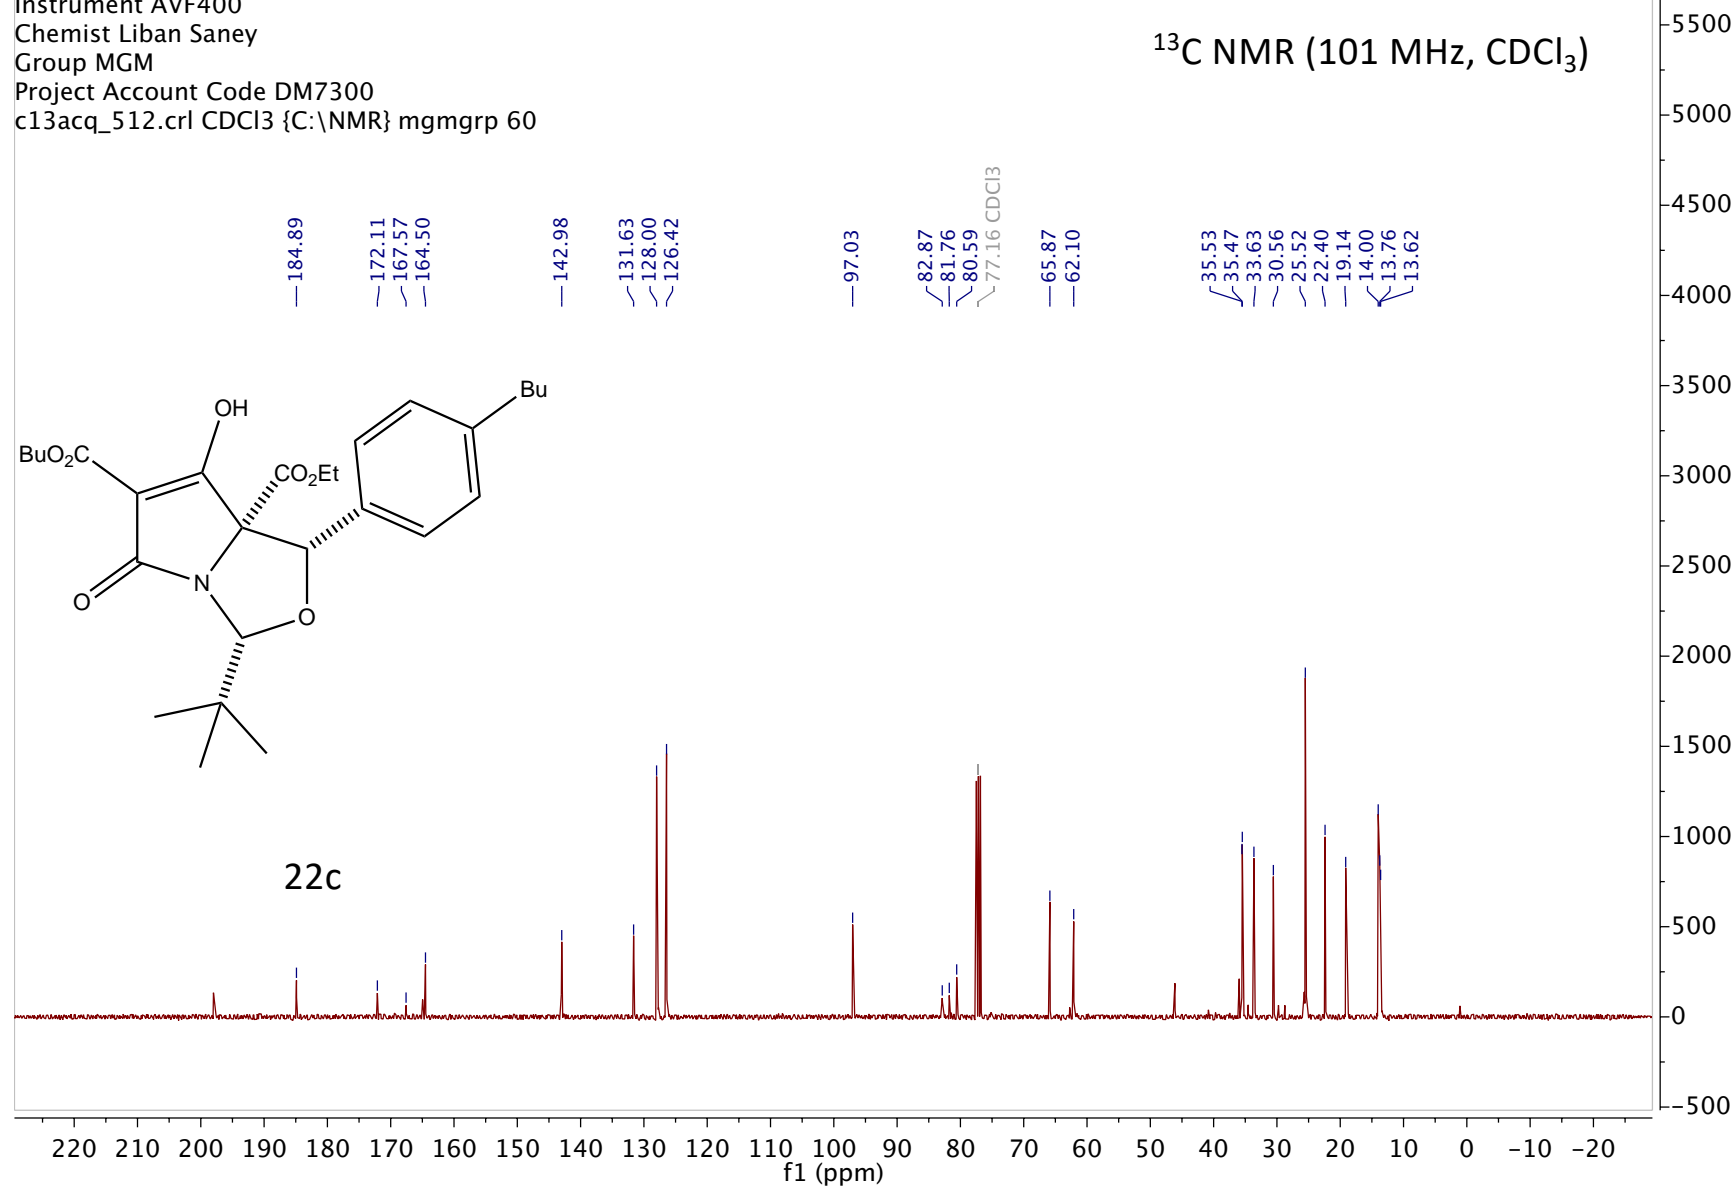

Oct03-2019-60-LS555(P) B10-D4.1.fid  
Instrument AVF400  
Chemist Liban Saney  
Group MGM  
Project Account Code DM7300  
h1acq.crl CDCl3 {C:\NMR} mgmgrp 60

<sup>1</sup>H NMR (400 MHz, CDCl<sub>3</sub>)

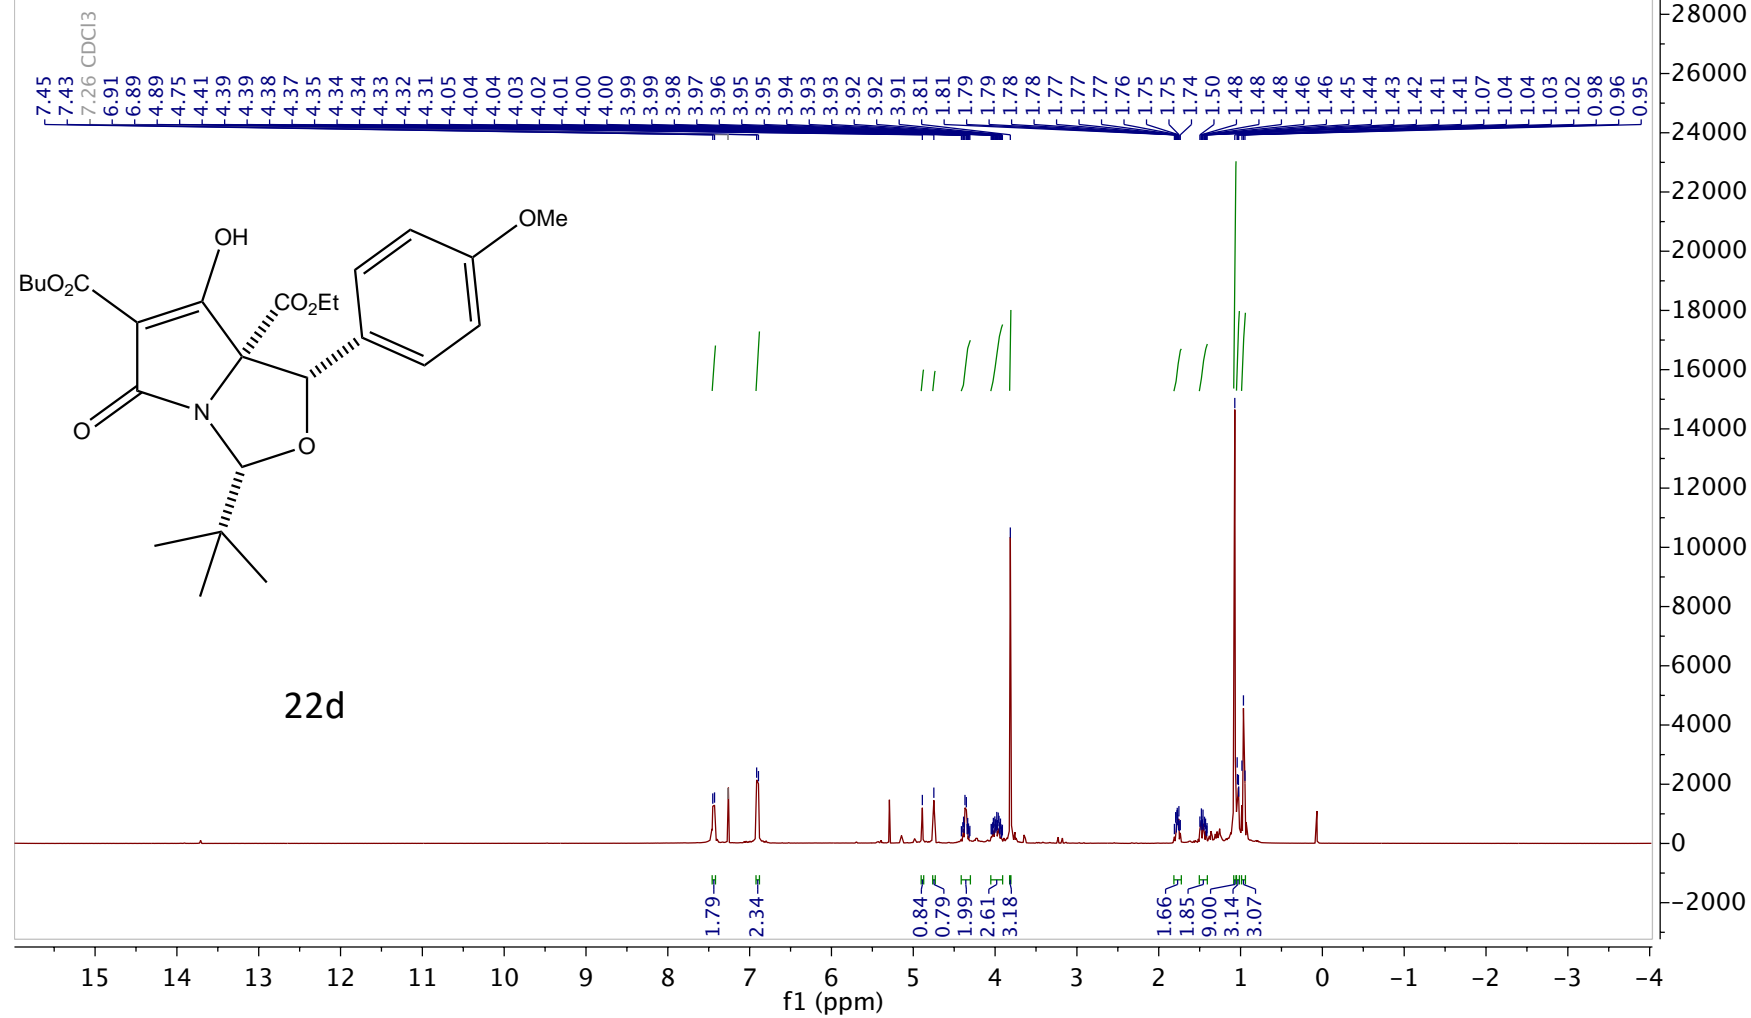



Oct03-2019-60-LS555(P) B10-D4.4.fid  
Instrument AVF400  
Chemist Liban Saney  
Group MGM  
Project Account Code DM7300  
c13acq\_512.crl CDCl3 {C:\NMR} mgmgrp 60

<sup>13</sup>C NMR (101 MHz, CDCl<sub>3</sub>)

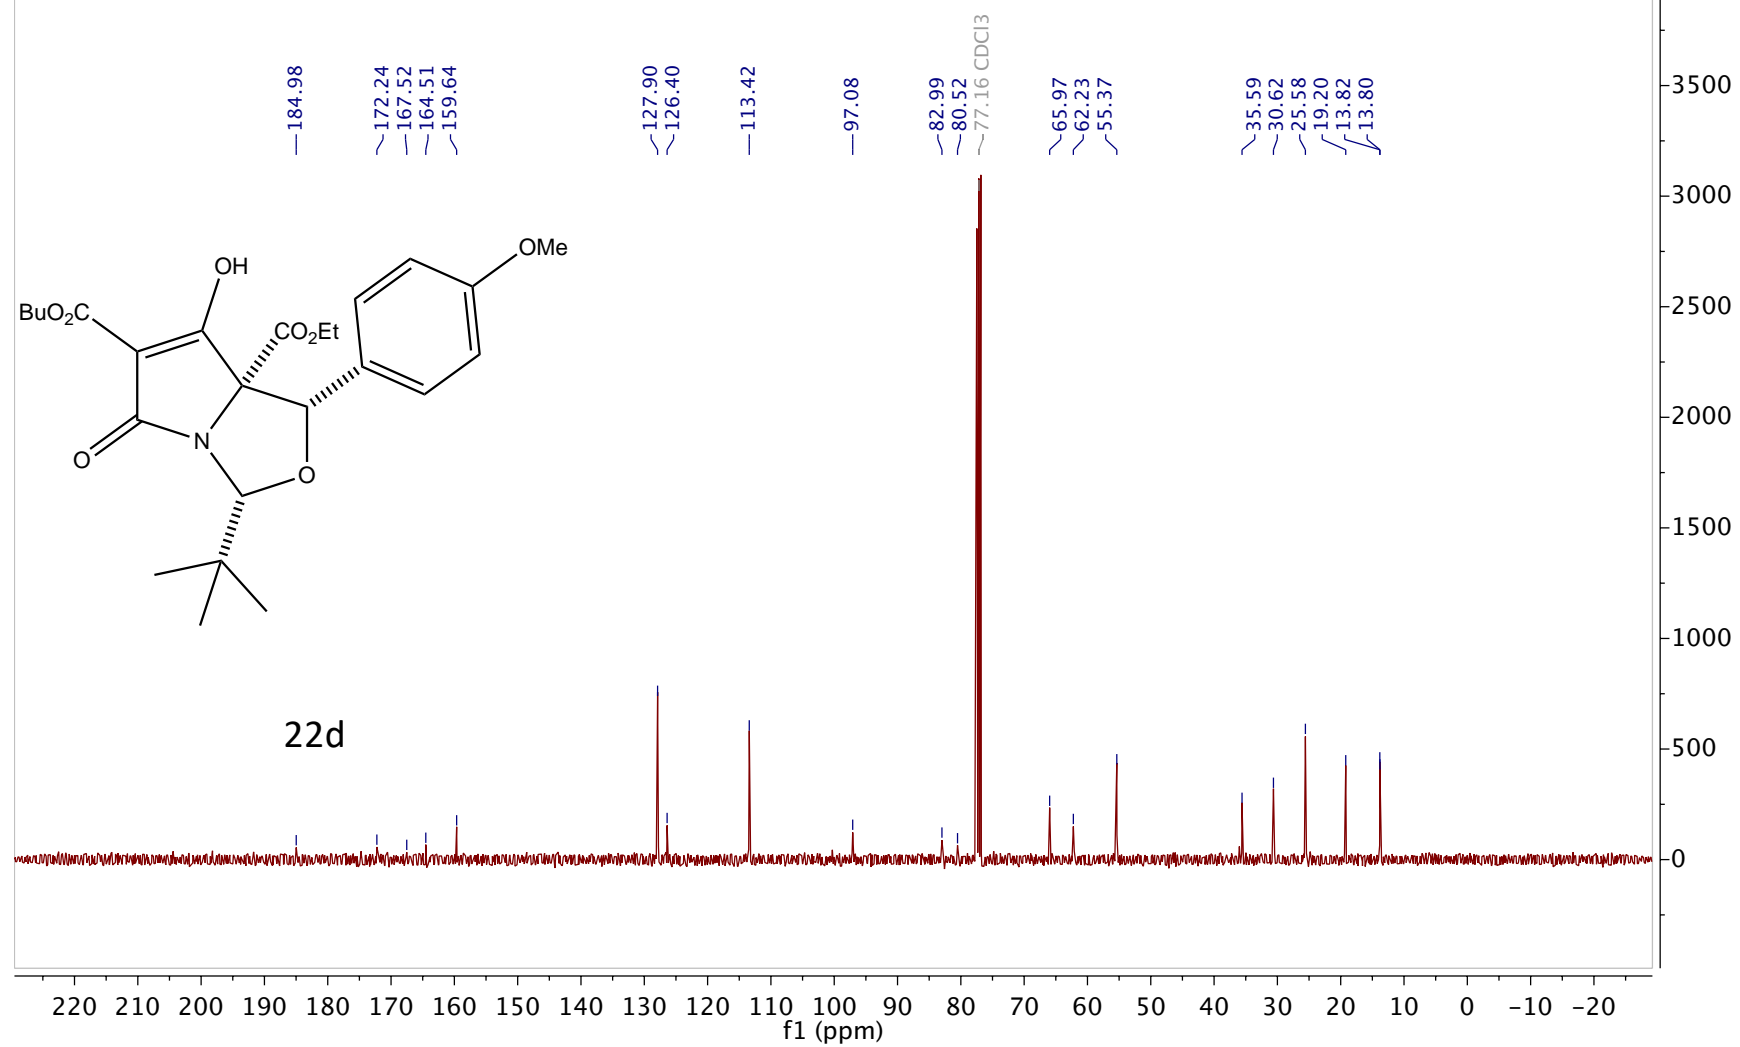

Oct19-2019-1-LS560(P) E5-F11.1.fid  
Instrument AVG400  
Group MGM  
Chemist Liban Saney  
Project Account Code DM7300  
h1acq.crl CDCl3 {C:\NMR} mgmgrp 1

<sup>1</sup>H NMR (400 MHz, CDCl<sub>3</sub>)

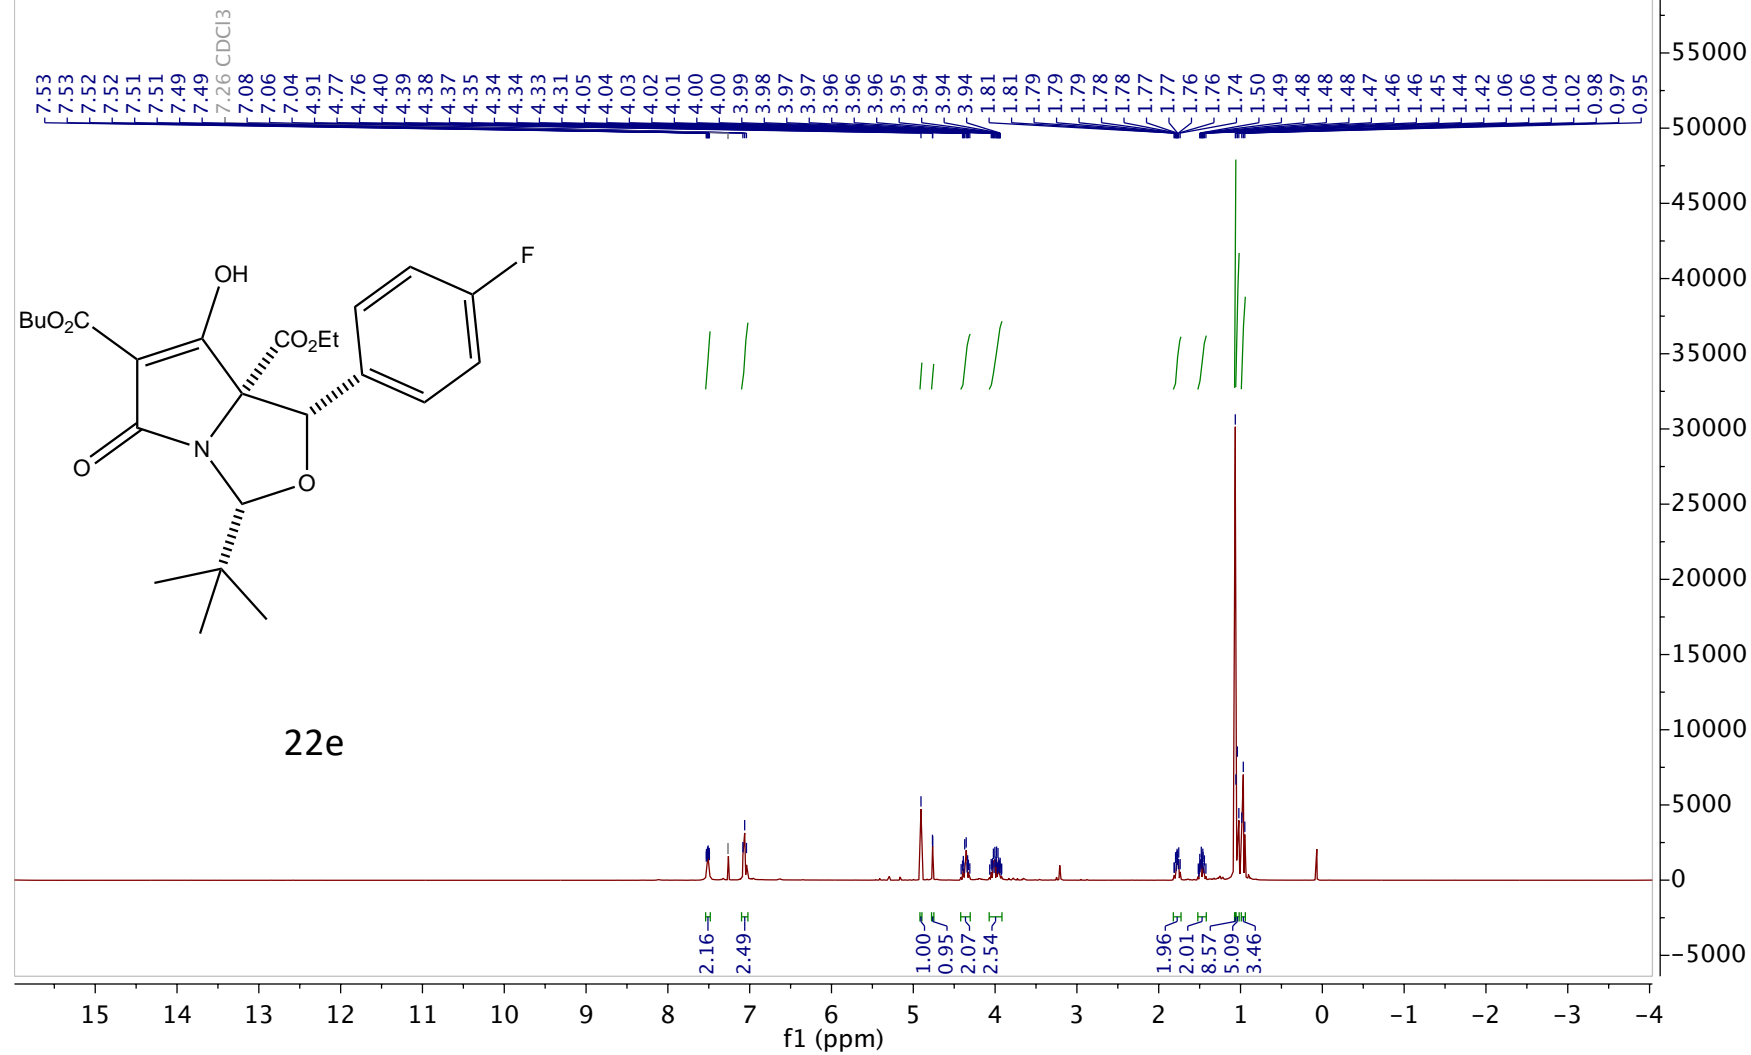

Oct19-2019-1-LS560(P) E5-F11.4.fid  
Instrument AVG400  
Group MGM  
Chemist Liban Saney  
Project Account Code DM7300  
c13acq\_512.crl CDCl3 {C:\NMR} mgmgrp 1

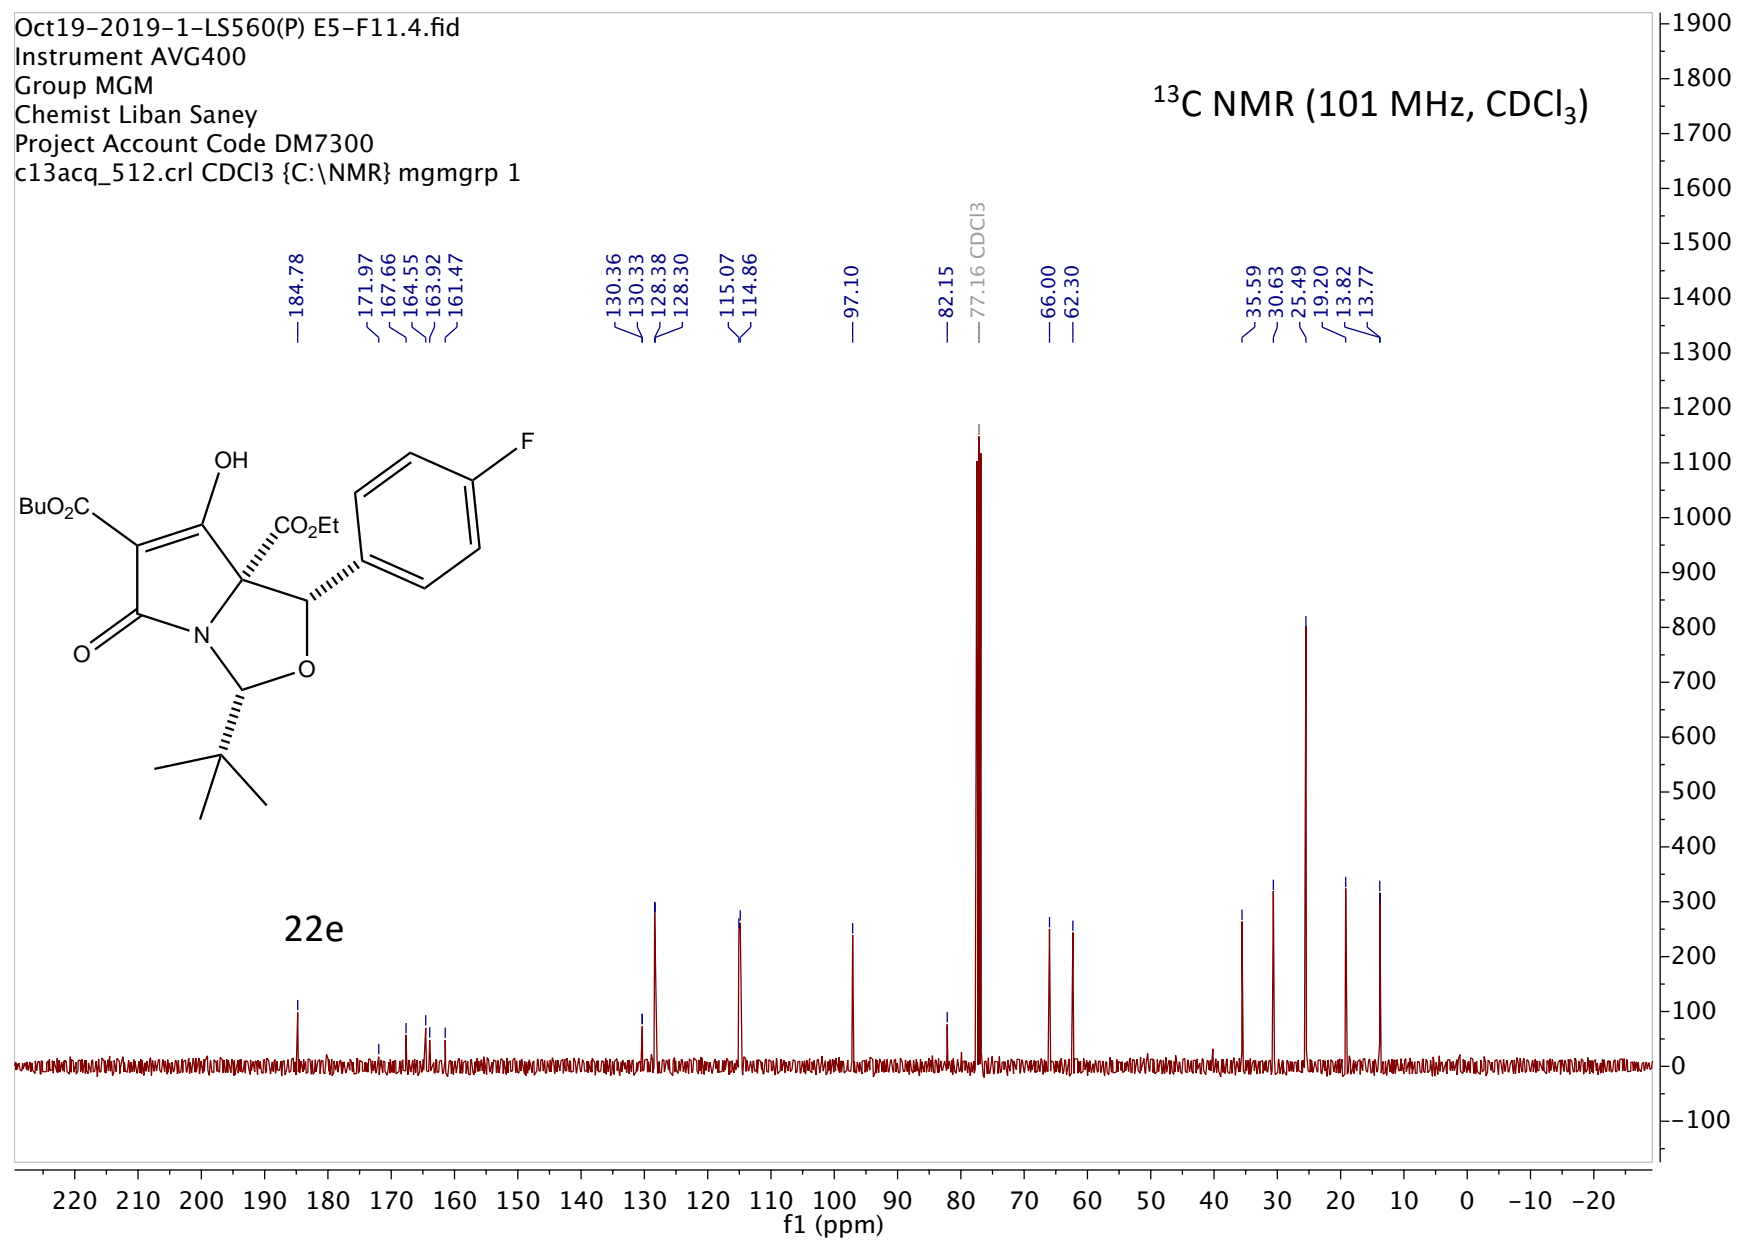

Oct19-2019-1-LS560(P) E5-F11.6.fid  
Instrument AVG400  
Group MGM  
Chemist Liban Saney  
Project Account Code DM7300  
f19acq\_256.crl CDCl3 {C:\NMR} mgmgrp 1

$^{19}\text{F}$  NMR (377 MHz,  $\text{CDCl}_3$ )

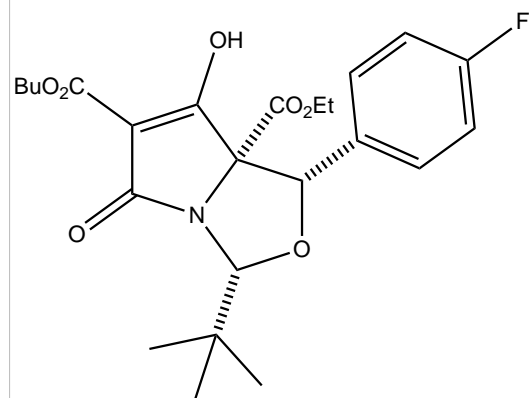

22e

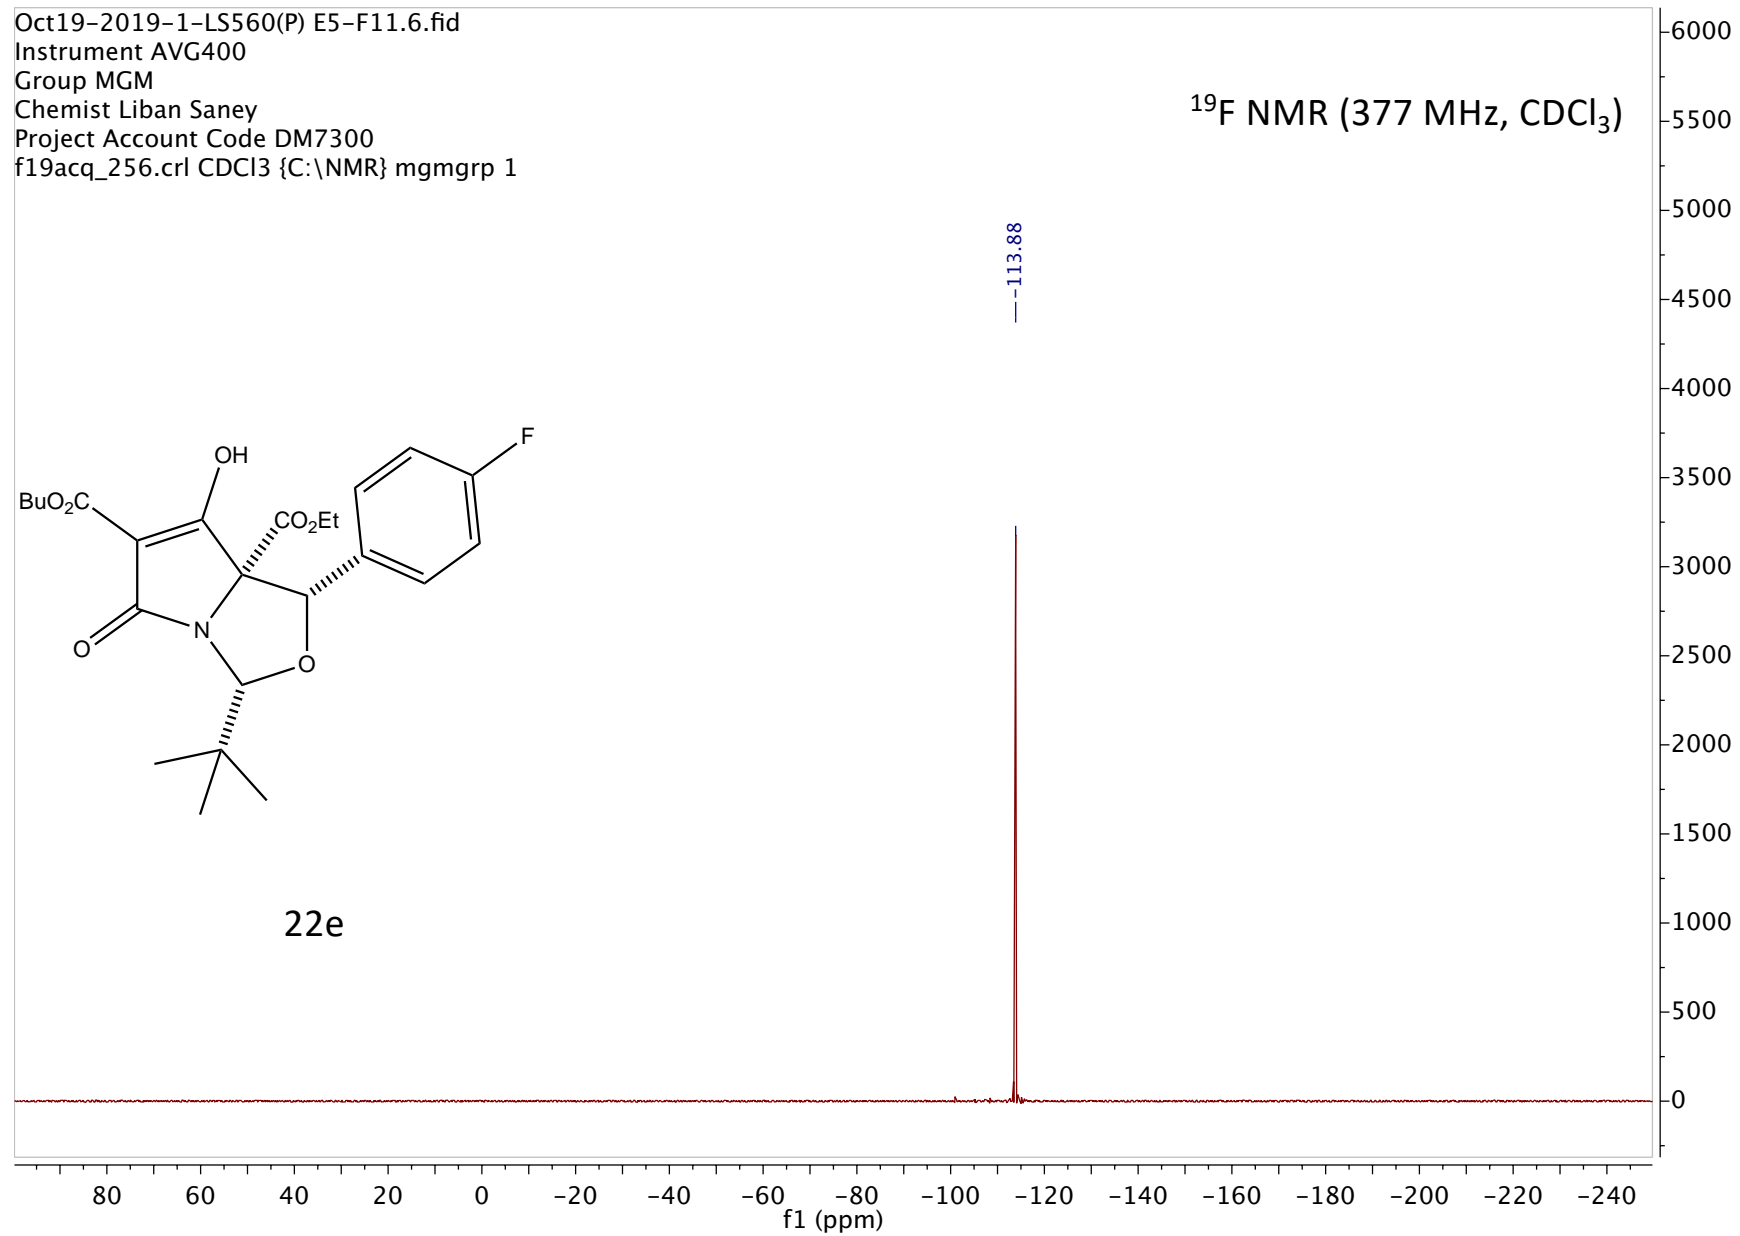

Oct20-2019-1-LS562(P) D6-F4.1.fid  
Instrument AVG400  
Group MGM  
Chemist Liban Saney  
Project Account Code DM7300  
h1acq.crl CDCl3 {C:\NMR} mgmgrp 1

<sup>1</sup>H NMR (400 MHz, CDCl<sub>3</sub>)

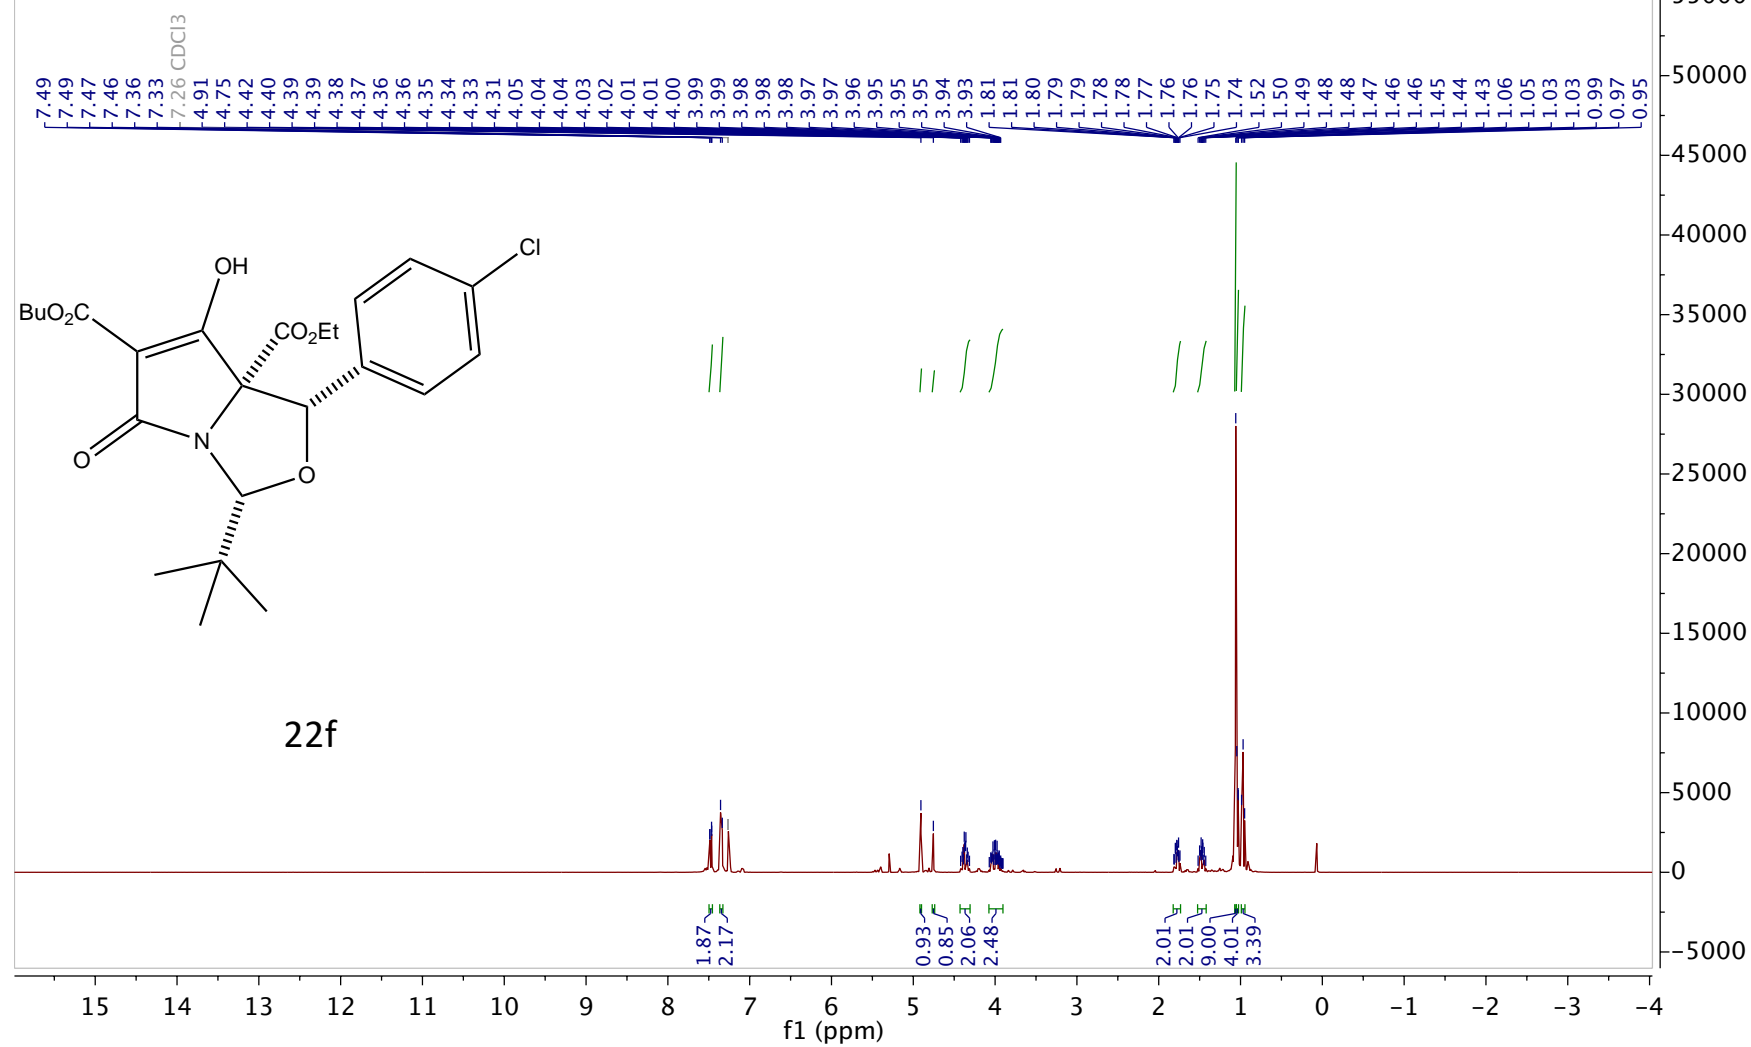

Oct20-2019-1-LS562(P) D6-F4.4.fid  
Instrument AVG400  
Group MGM  
Chemist Liban Saney  
Project Account Code DM7300  
c13acq\_512.crl CDCl3 {C:\NMR} mgmgrp 1

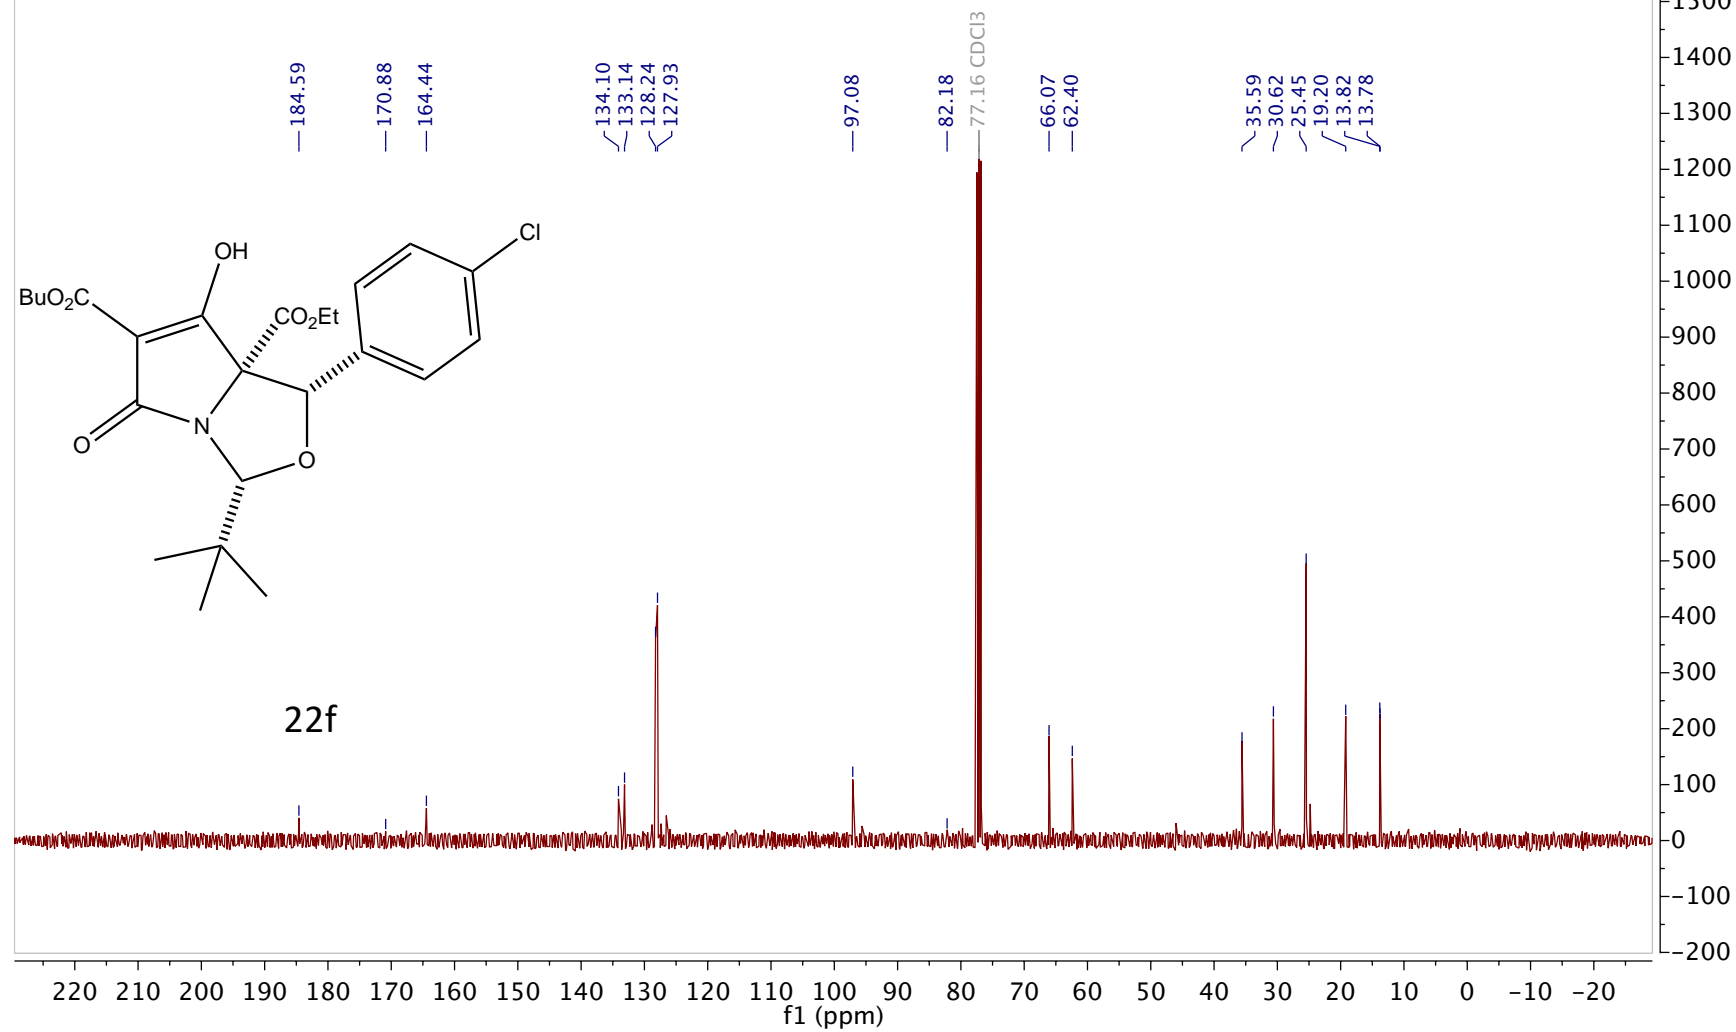

Aug05-2019-59-LS474(P) C6-E1 (Citric Acid Wash).1.fid  
Instrument AVF400  
Chemist Liban Saney  
Group MGM  
Project Account Code DM7300  
Citric Acid Wash  
h1acq.crl CDCl3 {C:\NMR} mgmgrp 59

<sup>1</sup>H NMR (400 MHz, CDCl<sub>3</sub>)

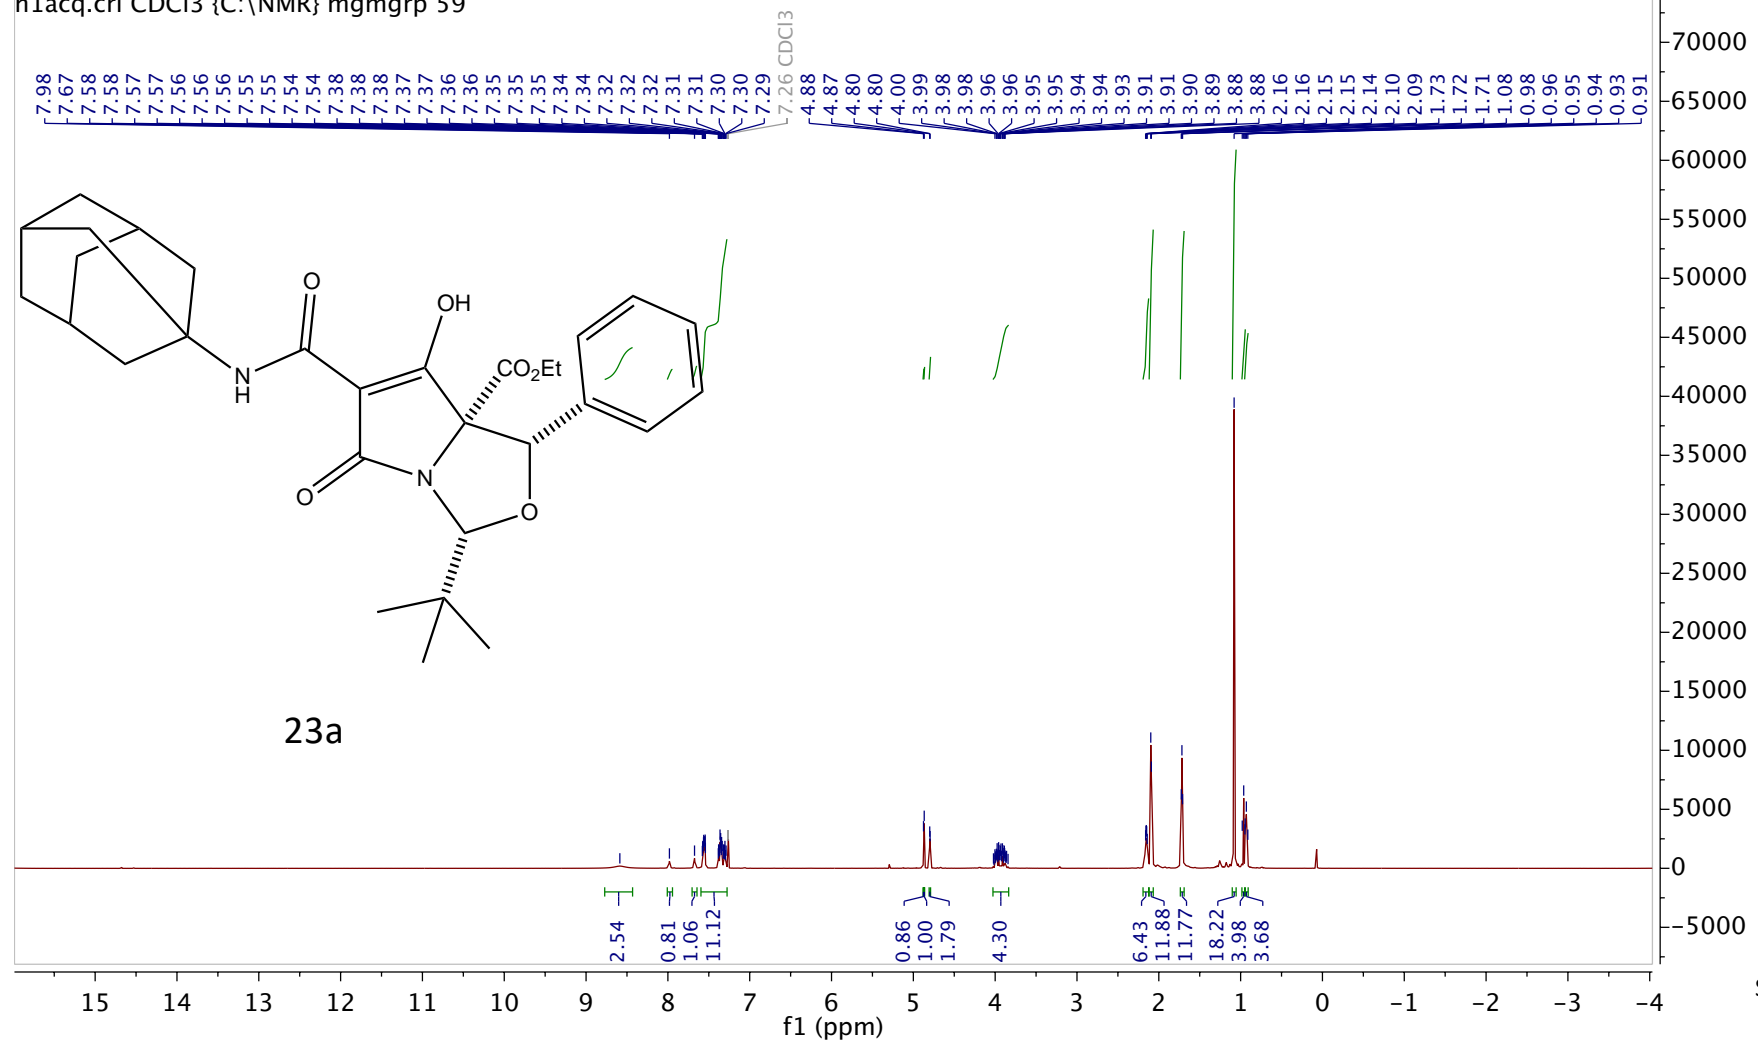

Aug05-2019-59-LS474(P) C6-E1 (Citric Acid Wash).4.fid

Instrument AVF400

Chemist Liban Saney

Group MGM

Project Account Code DM7300

Citric Acid Wash

c13acq\_512.crl CDCl3 {C:\NMR} mgmgrp 59

<sup>13</sup>C NMR (101 MHz, CDCl<sub>3</sub>)

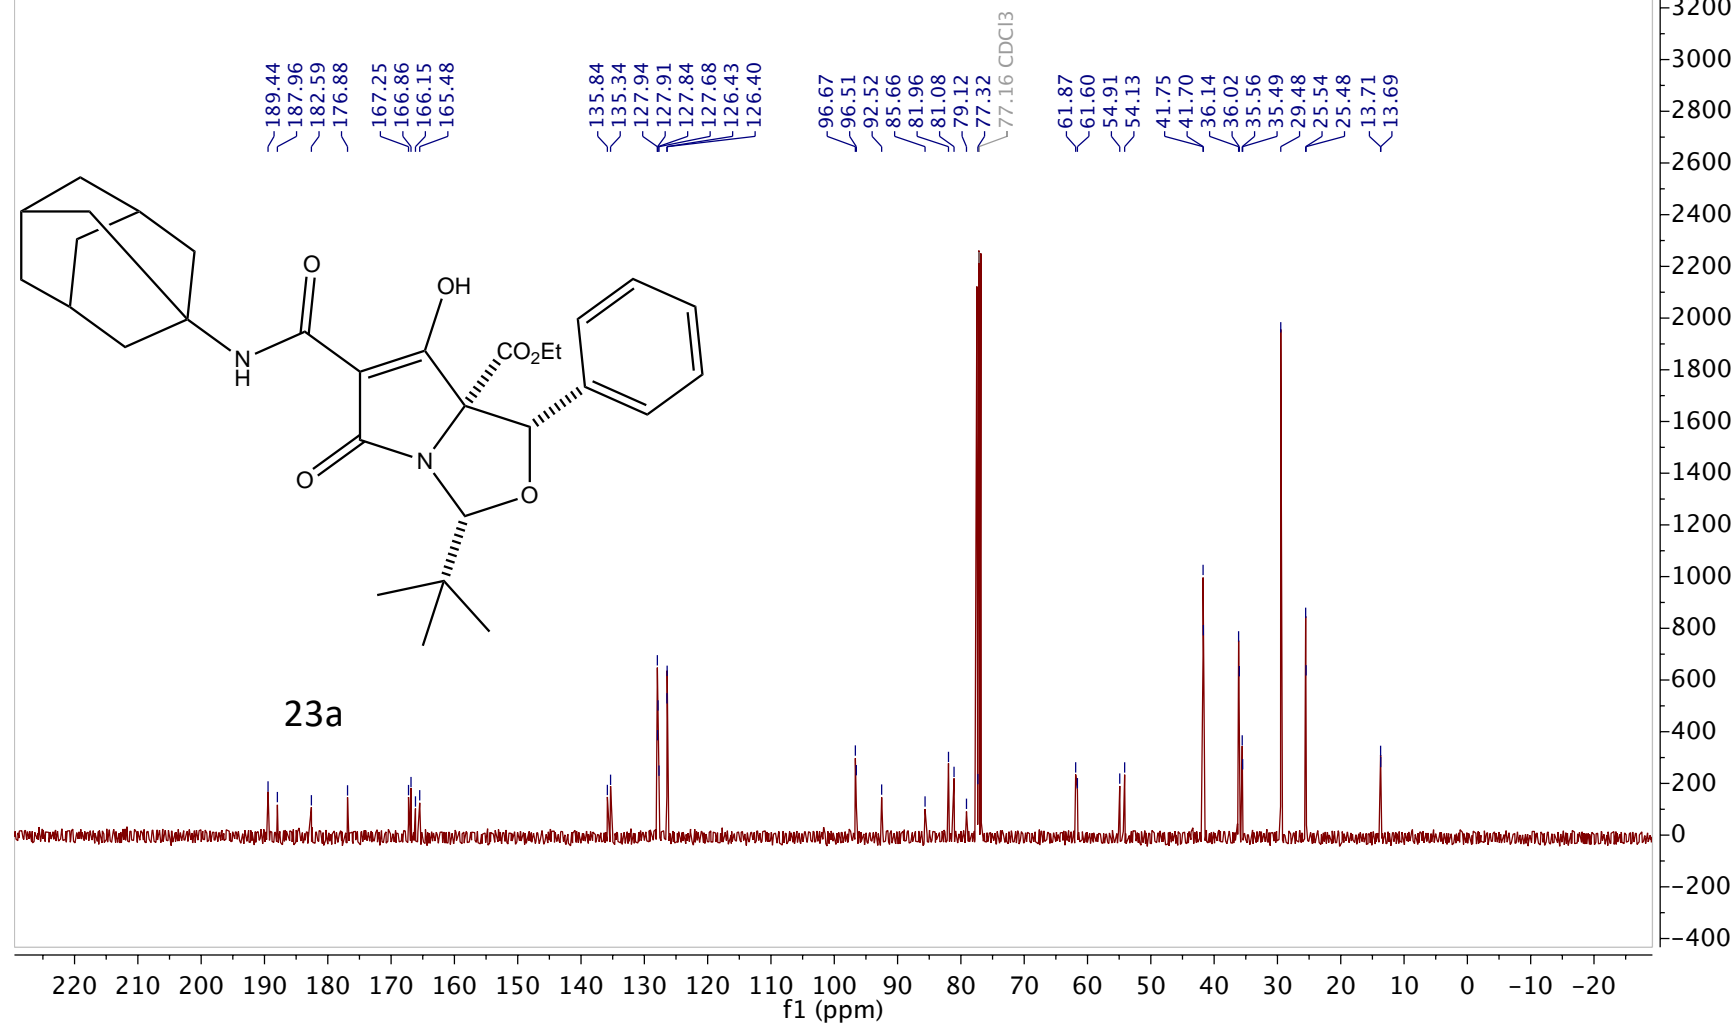



Oct04-2019-60-LS554(P) C2-D6.1.fid  
Instrument AVF400  
Chemist Liban Saney  
Group MGM  
Project Account Code DM7300  
h1acq.crl CDCI3 {C:\NMR} mgmgrp 60

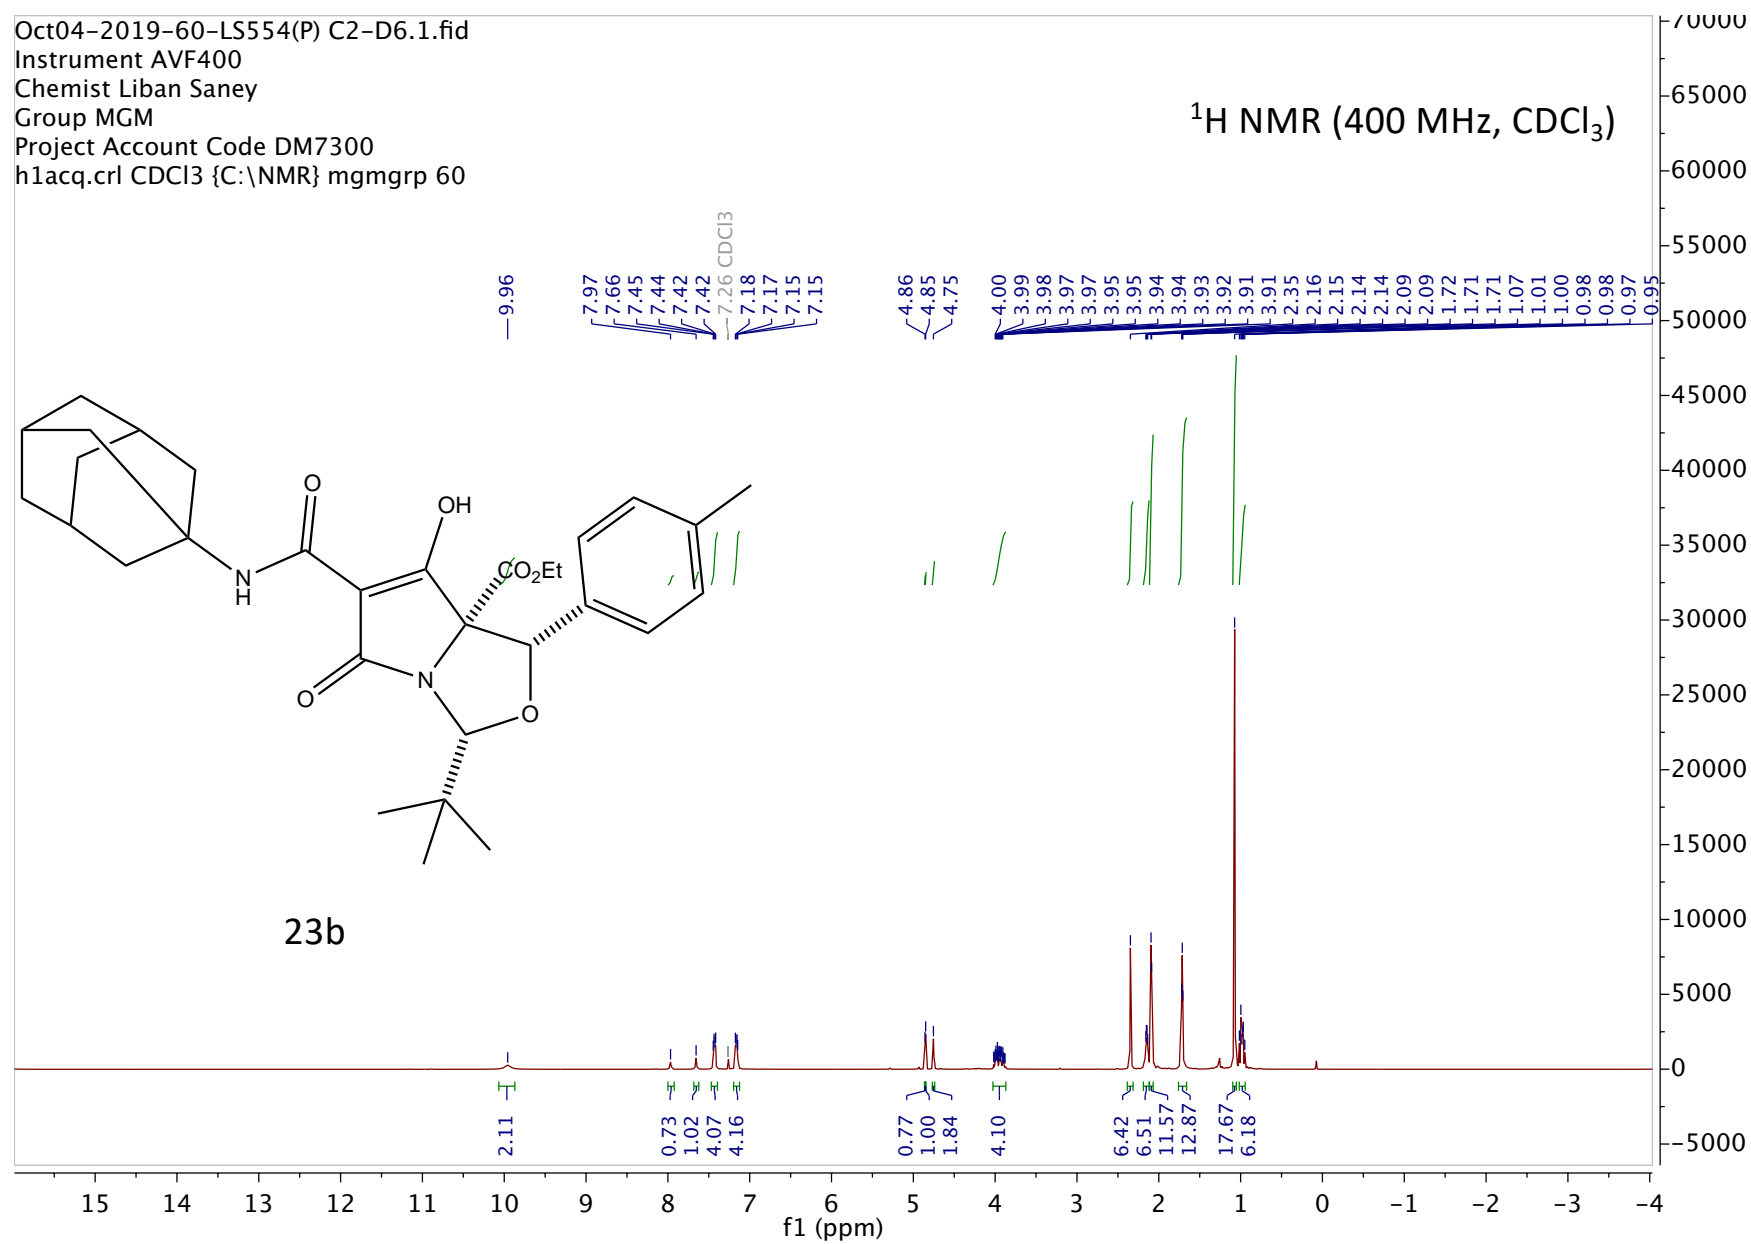

Oct04-2019-60-LS554(P) C2-D6.4.fid  
Instrument AVF400  
Chemist Liban Saney  
Group MGM  
Project Account Code DM7300  
c13acq\_512.crl CDCl3 {C:\NMR} mgmgrp 60

<sup>13</sup>C NMR (101 MHz, CDCl<sub>3</sub>)

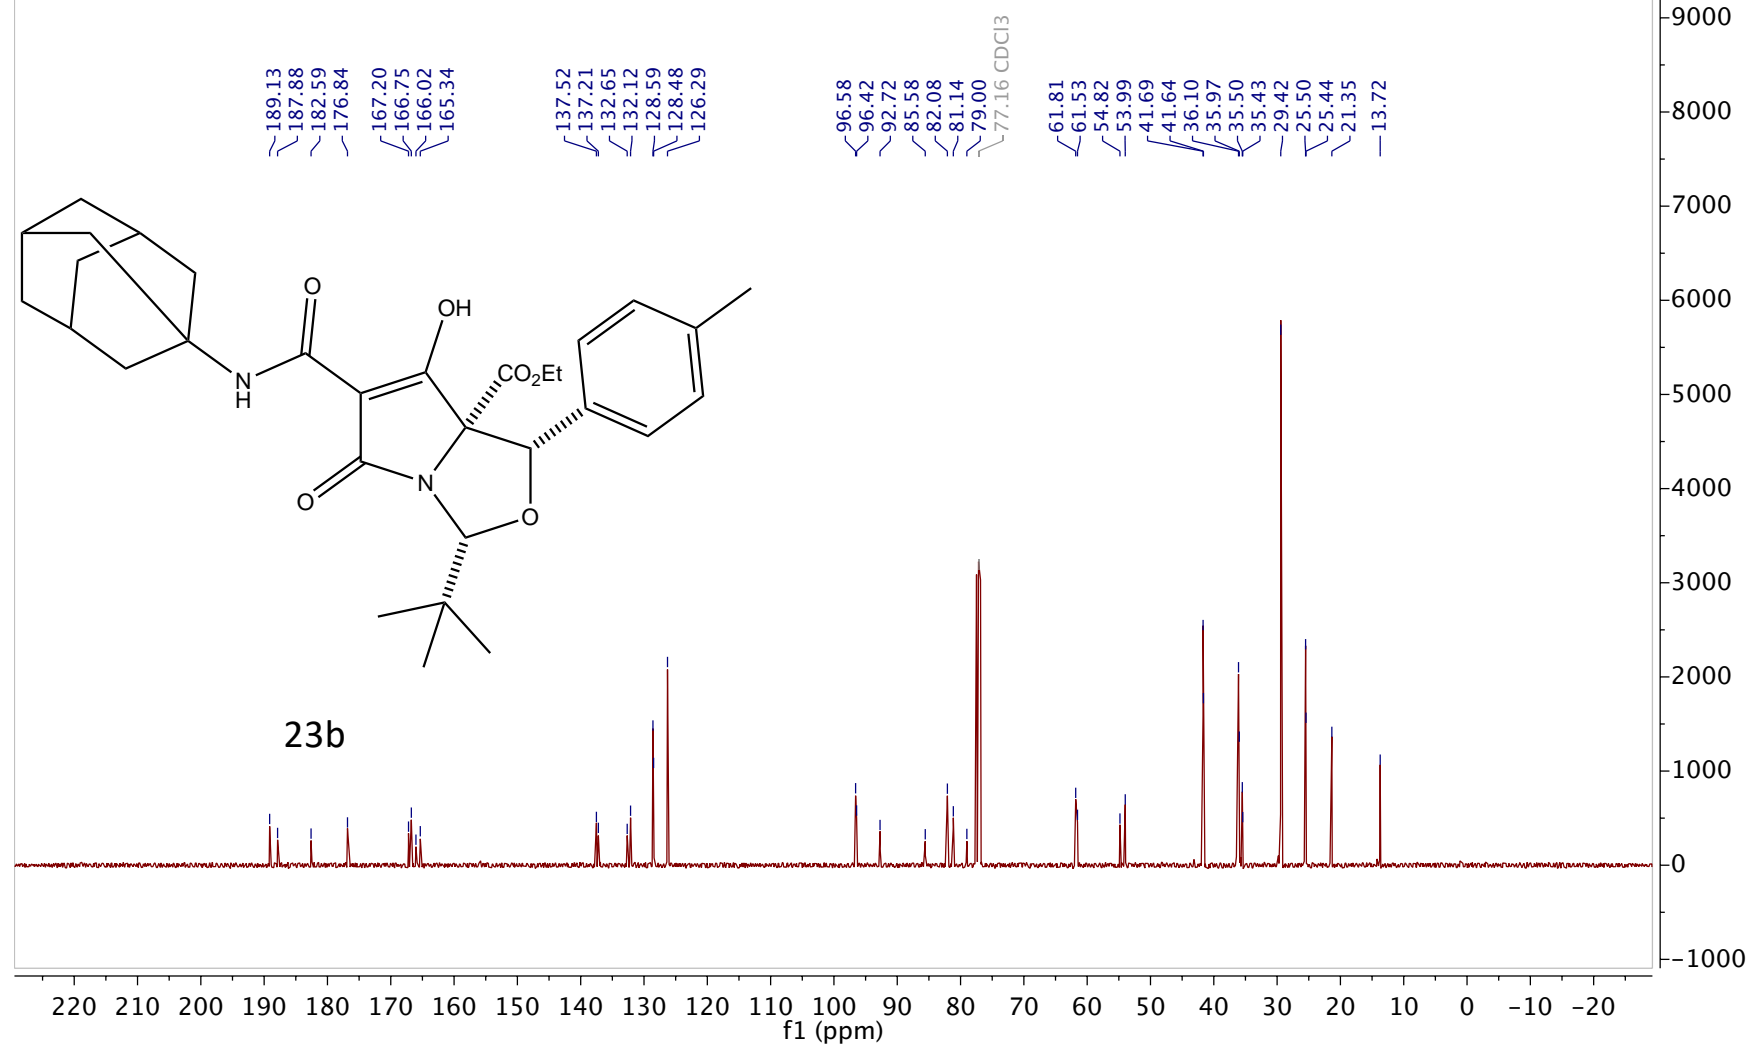

Oct20-2019-1-LS561(P) A3-C4.1.fid  
Instrument AVG400  
Group MGM  
Chemist Liban Saney  
Project Account Code DM7300  
h1acq.crl CDCl3 {C:\NMR} mgmgrp 1

<sup>1</sup>H NMR (400 MHz, CDCl<sub>3</sub>)

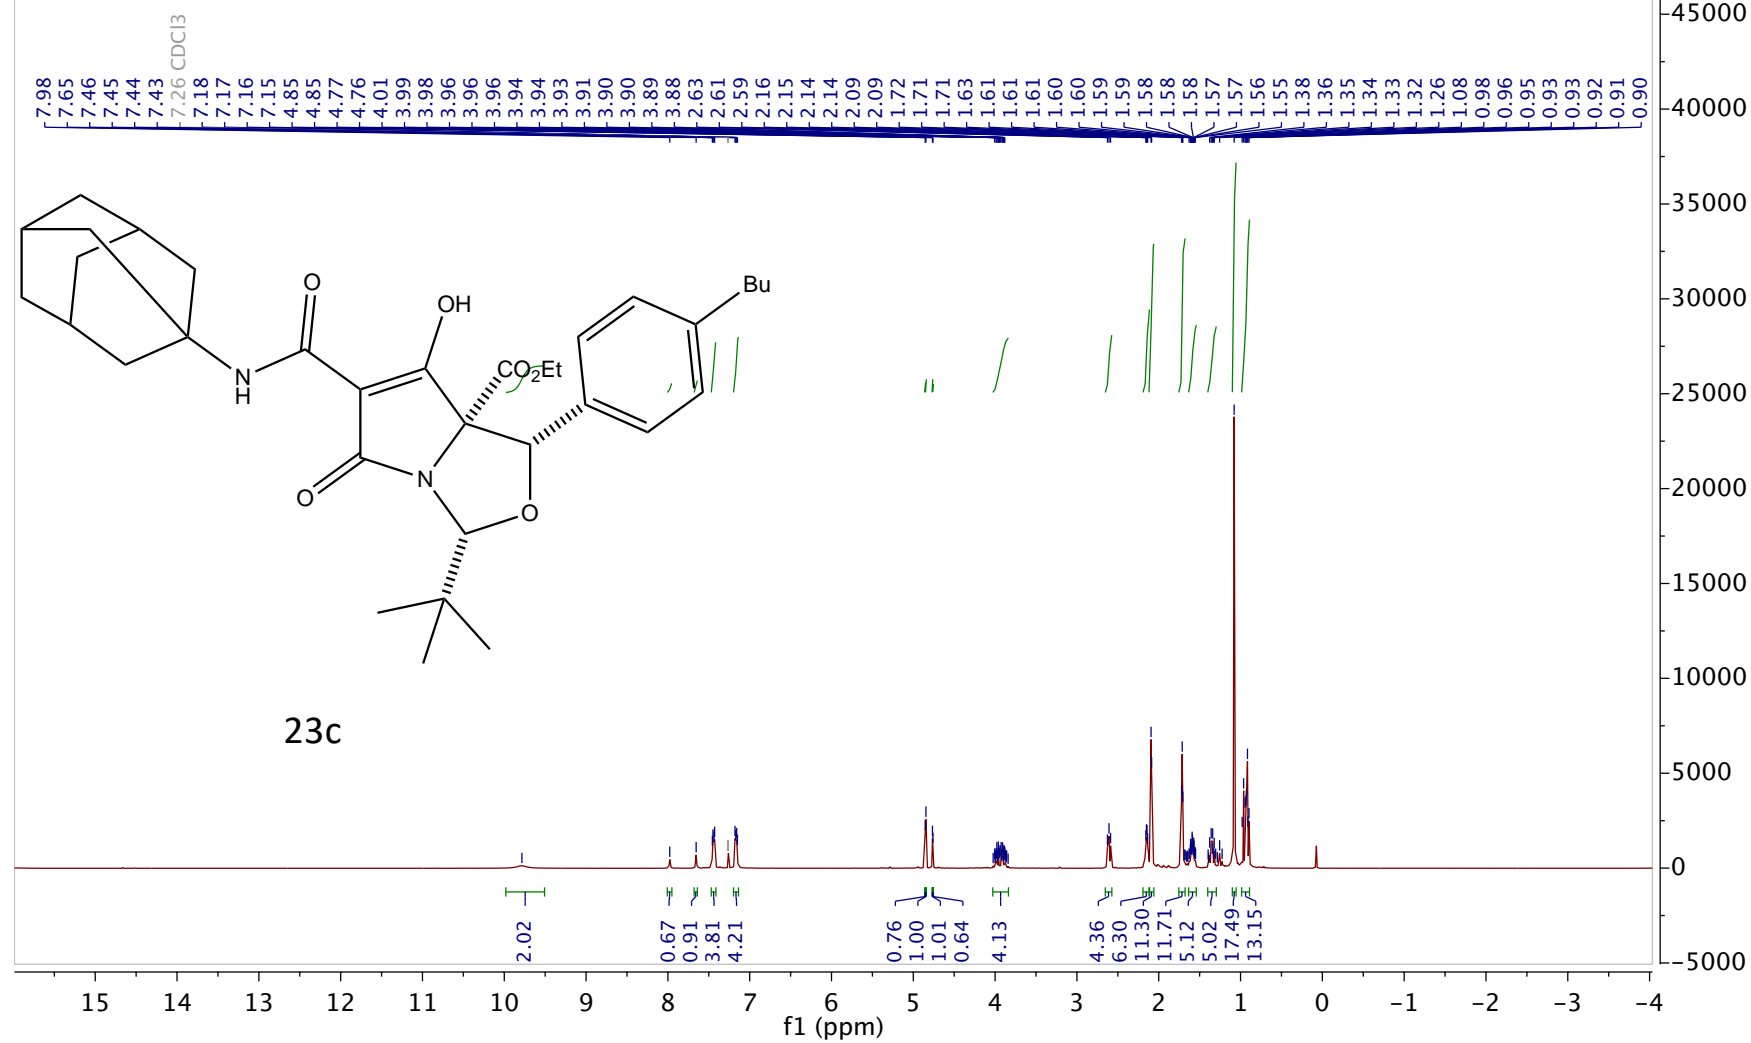

Oct20-2019-1-LS561(P) A3-C4.4.fid  
Instrument AVG400  
Group MGM  
Chemist Liban Saney  
Project Account Code DM7300  
c13acq\_512.crl CDCl3 {C:\NMR} mgmgrp 1

<sup>13</sup>C NMR (101 MHz, CDCl<sub>3</sub>)

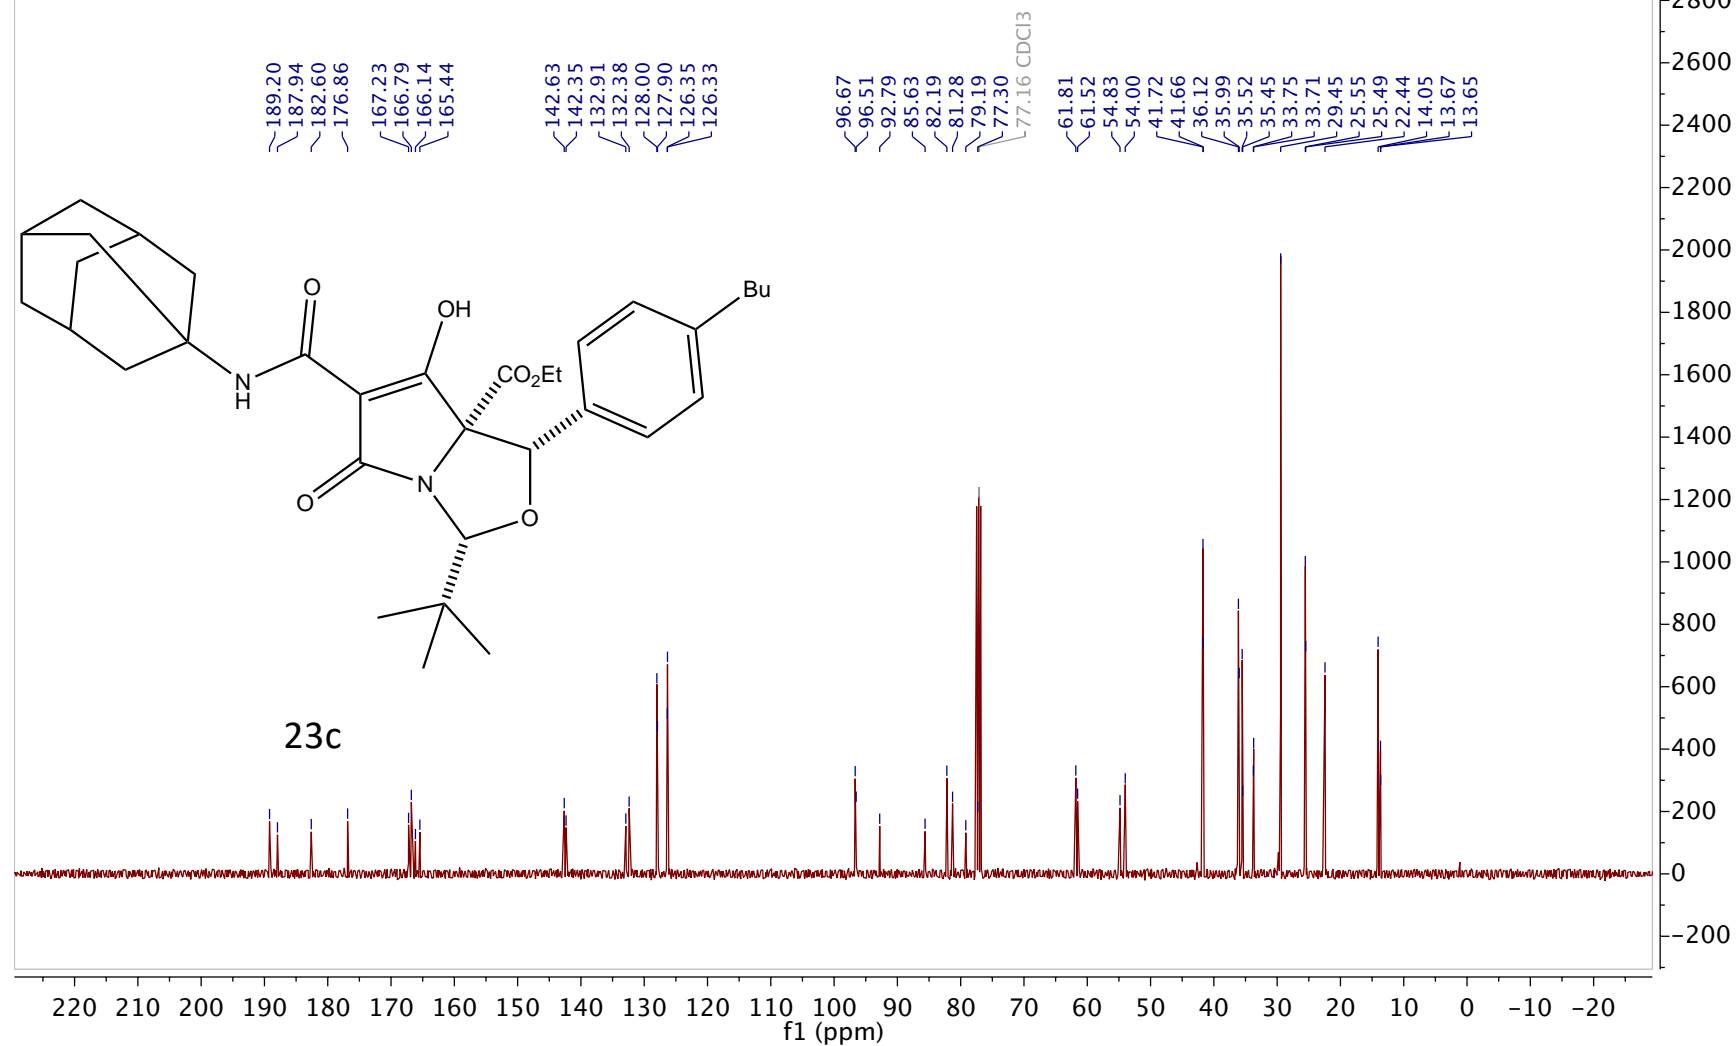

Oct16-2019-60-LS558(P) B4-B11.1.fid  
Instrument AVF400  
Chemist Liban Saney  
Group MGM  
Project Account Code DM7300  
h1acq.crl CDCl3 {C:\NMR} mgmgrp 60

<sup>1</sup>H NMR (400 MHz, CDCl<sub>3</sub>)

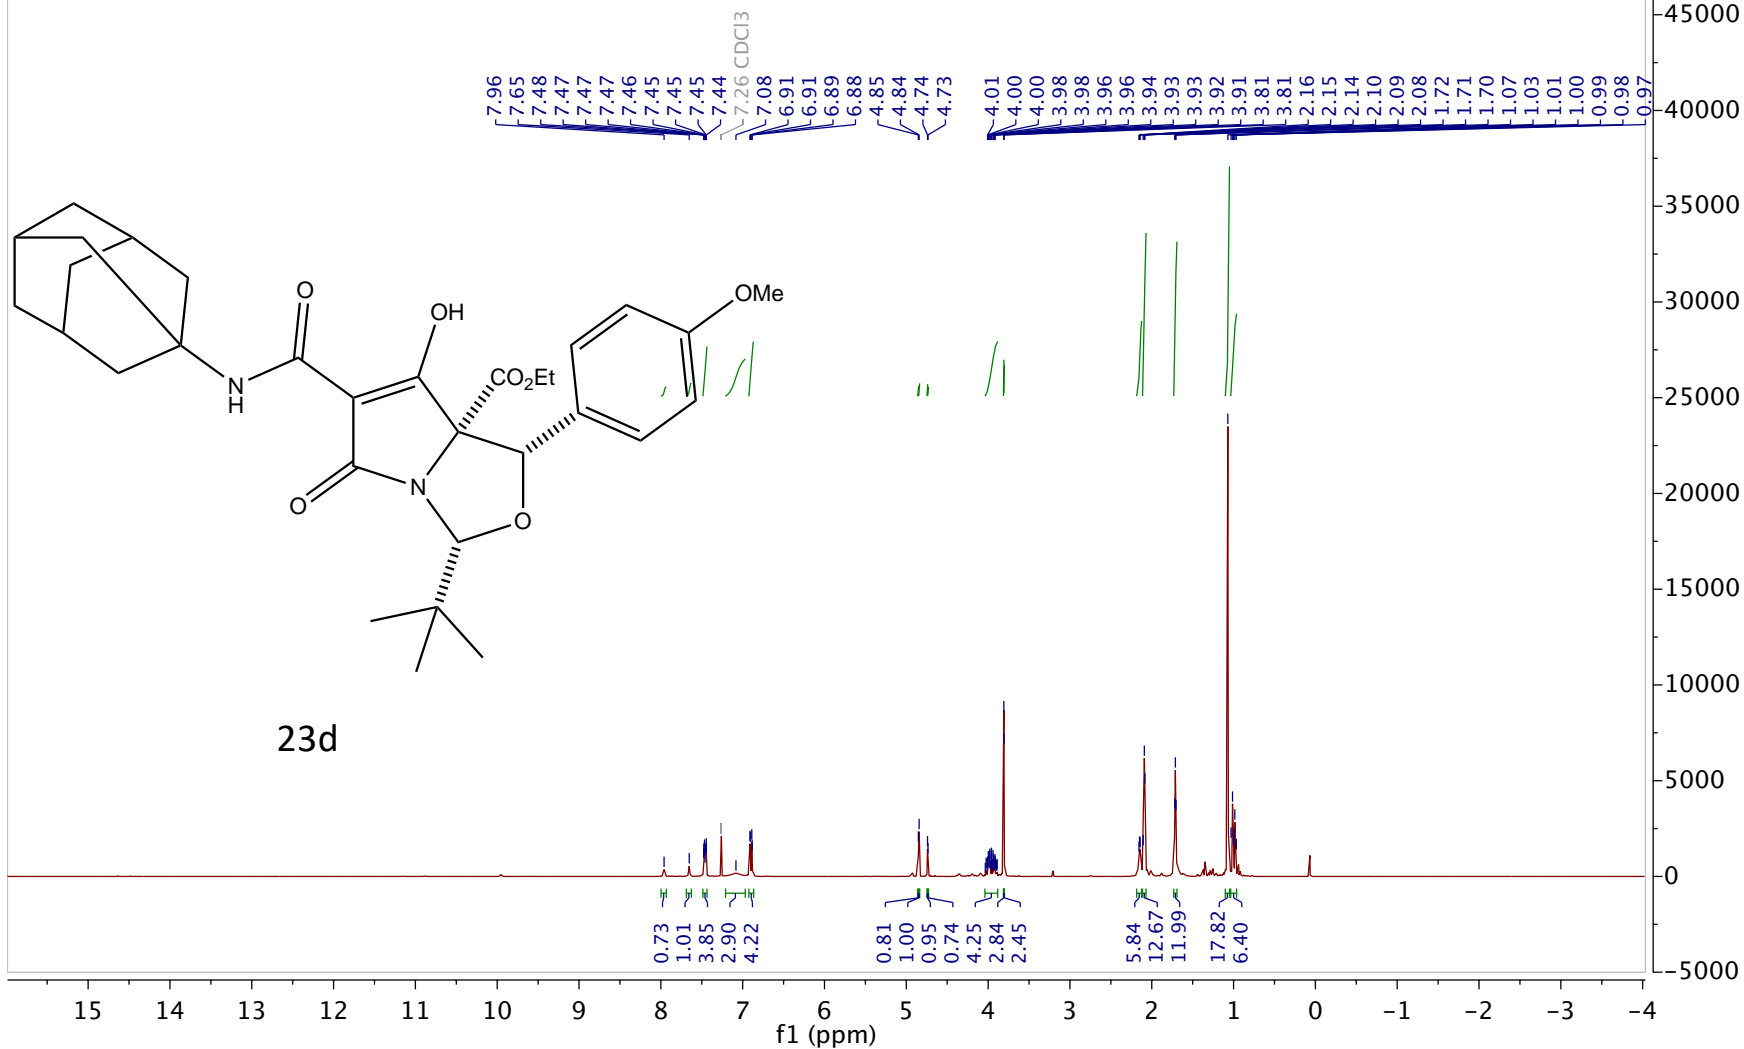

Oct16-2019-60-LS558(P) B4-B11.4.fid  
Instrument AVF400  
Chemist Liban Saney  
Group MGM  
Project Account Code DM7300  
c13acq\_512.crl CDCl3 {C:\NMR} mgmgrp 60

<sup>13</sup>C NMR (101 MHz, CDCl<sub>3</sub>)

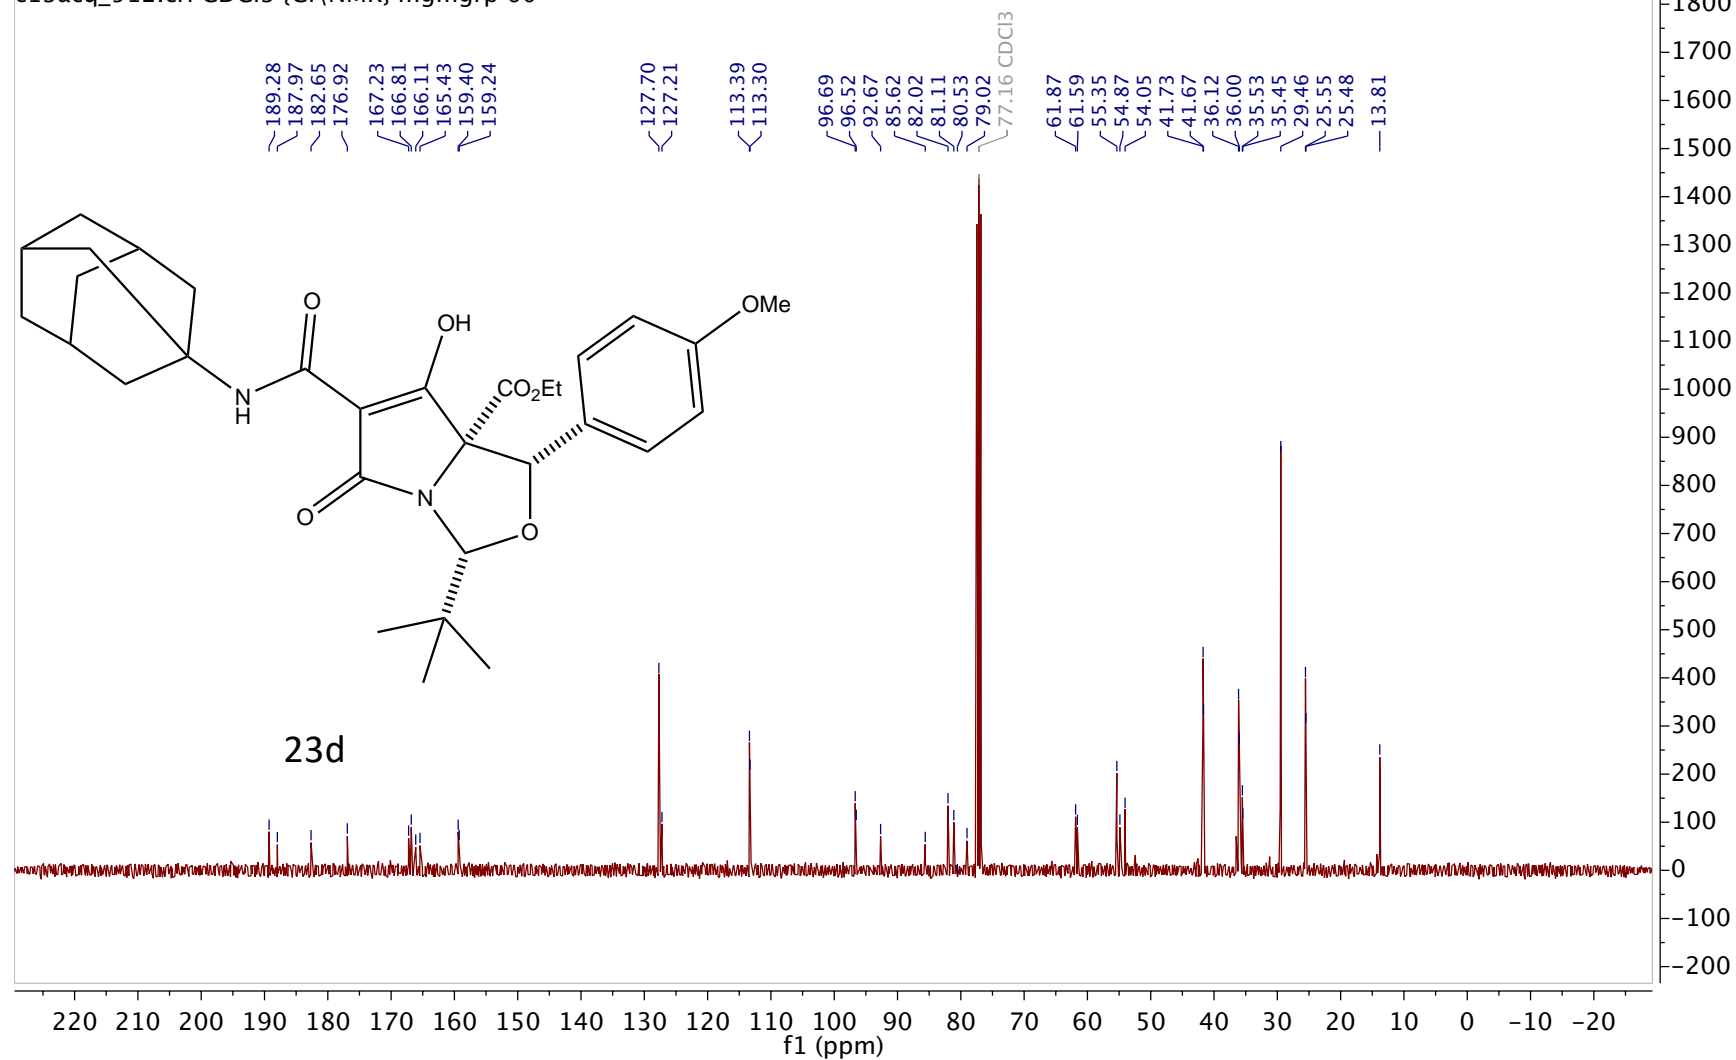

Oct21-2019-9-LS563(P) C1-C6.1.fid  
Instrument AVG400  
Group MGM  
Chemist Liban Saney  
Project Account Code DM7300  
h1acq.crl CDCl3 {C:\NMR} mgmgrp 9

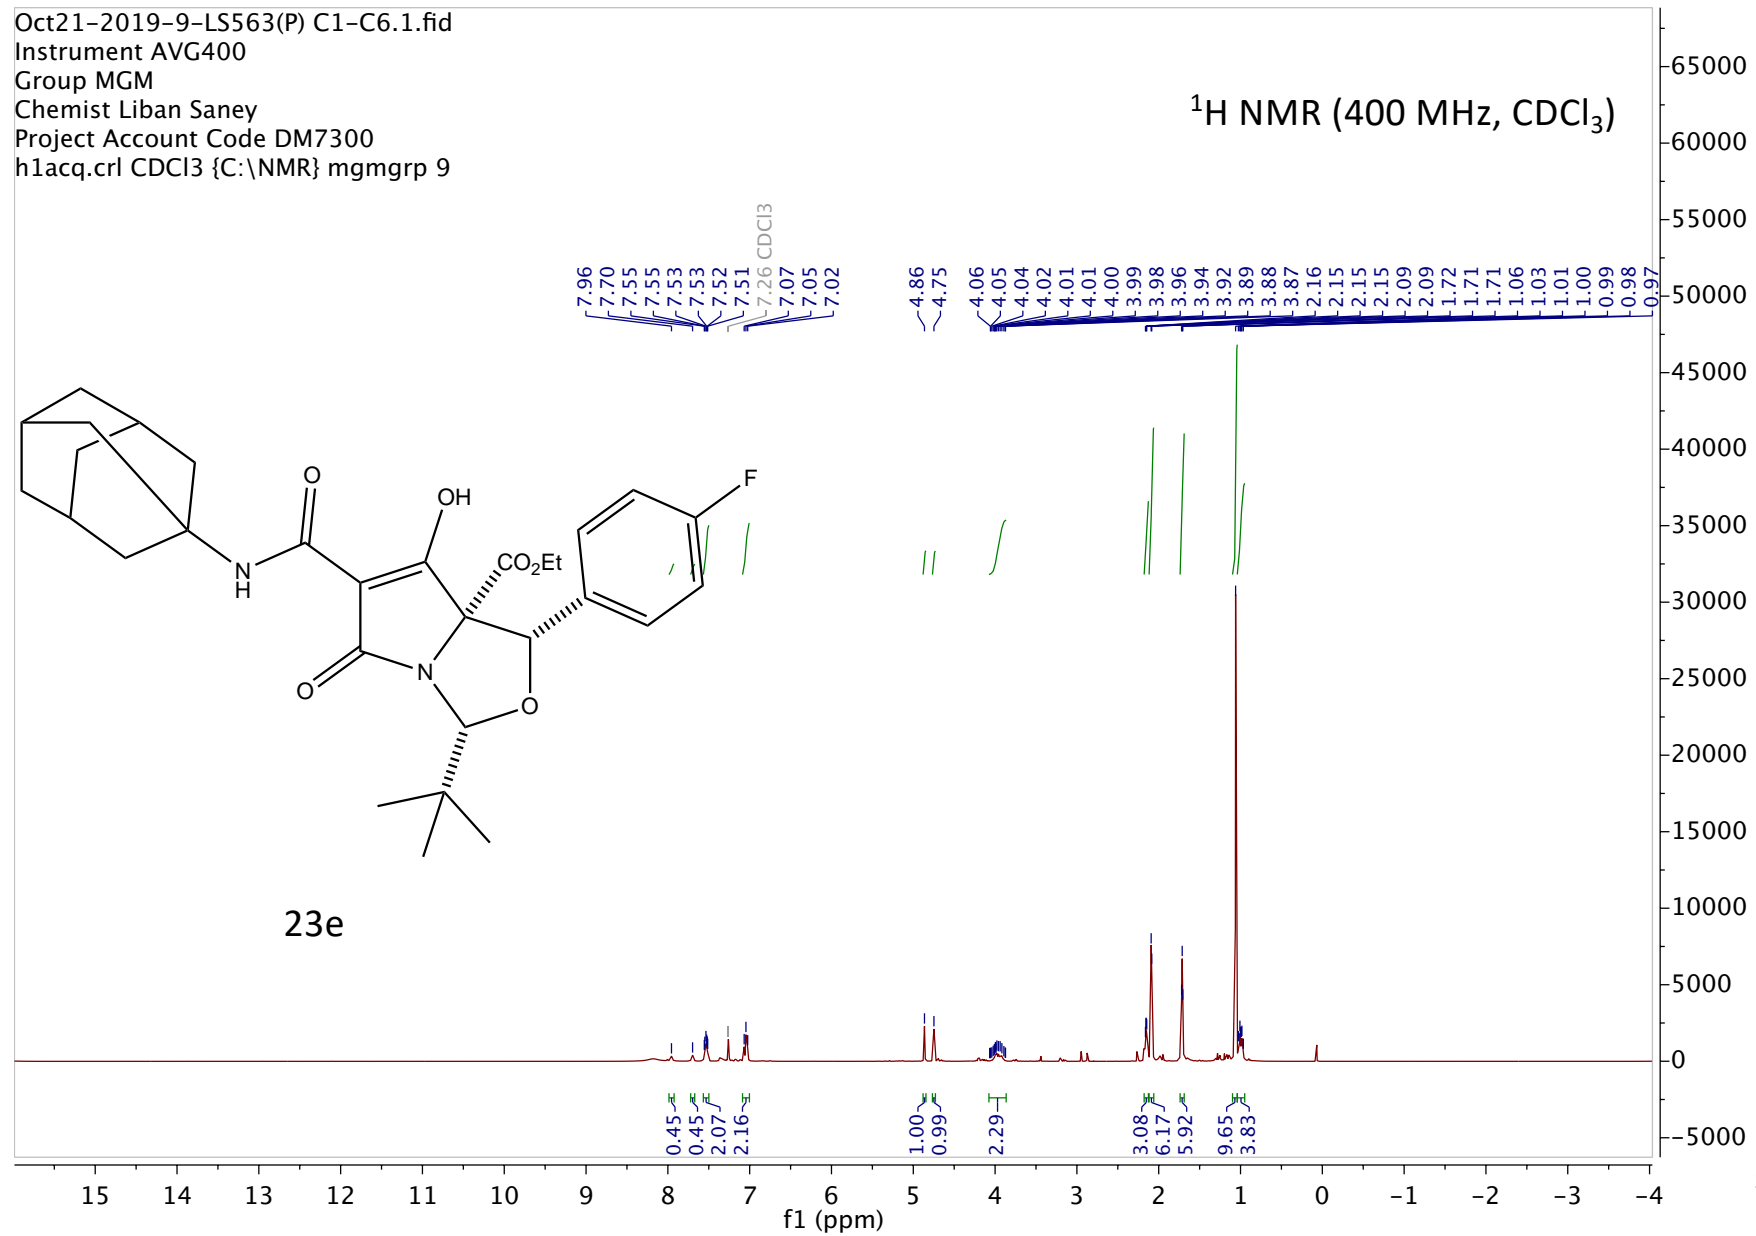

Oct21-2019-9-LS563(P) C1-C6.4.fid  
Instrument AVG400  
Group MGM  
Chemist Liban Saney  
Project Account Code DM7300  
c13acq\_512.crl CDCl3 {C:\NMR} mgmgrp 9

<sup>13</sup>C NMR (101 MHz, CDCl<sub>3</sub>)

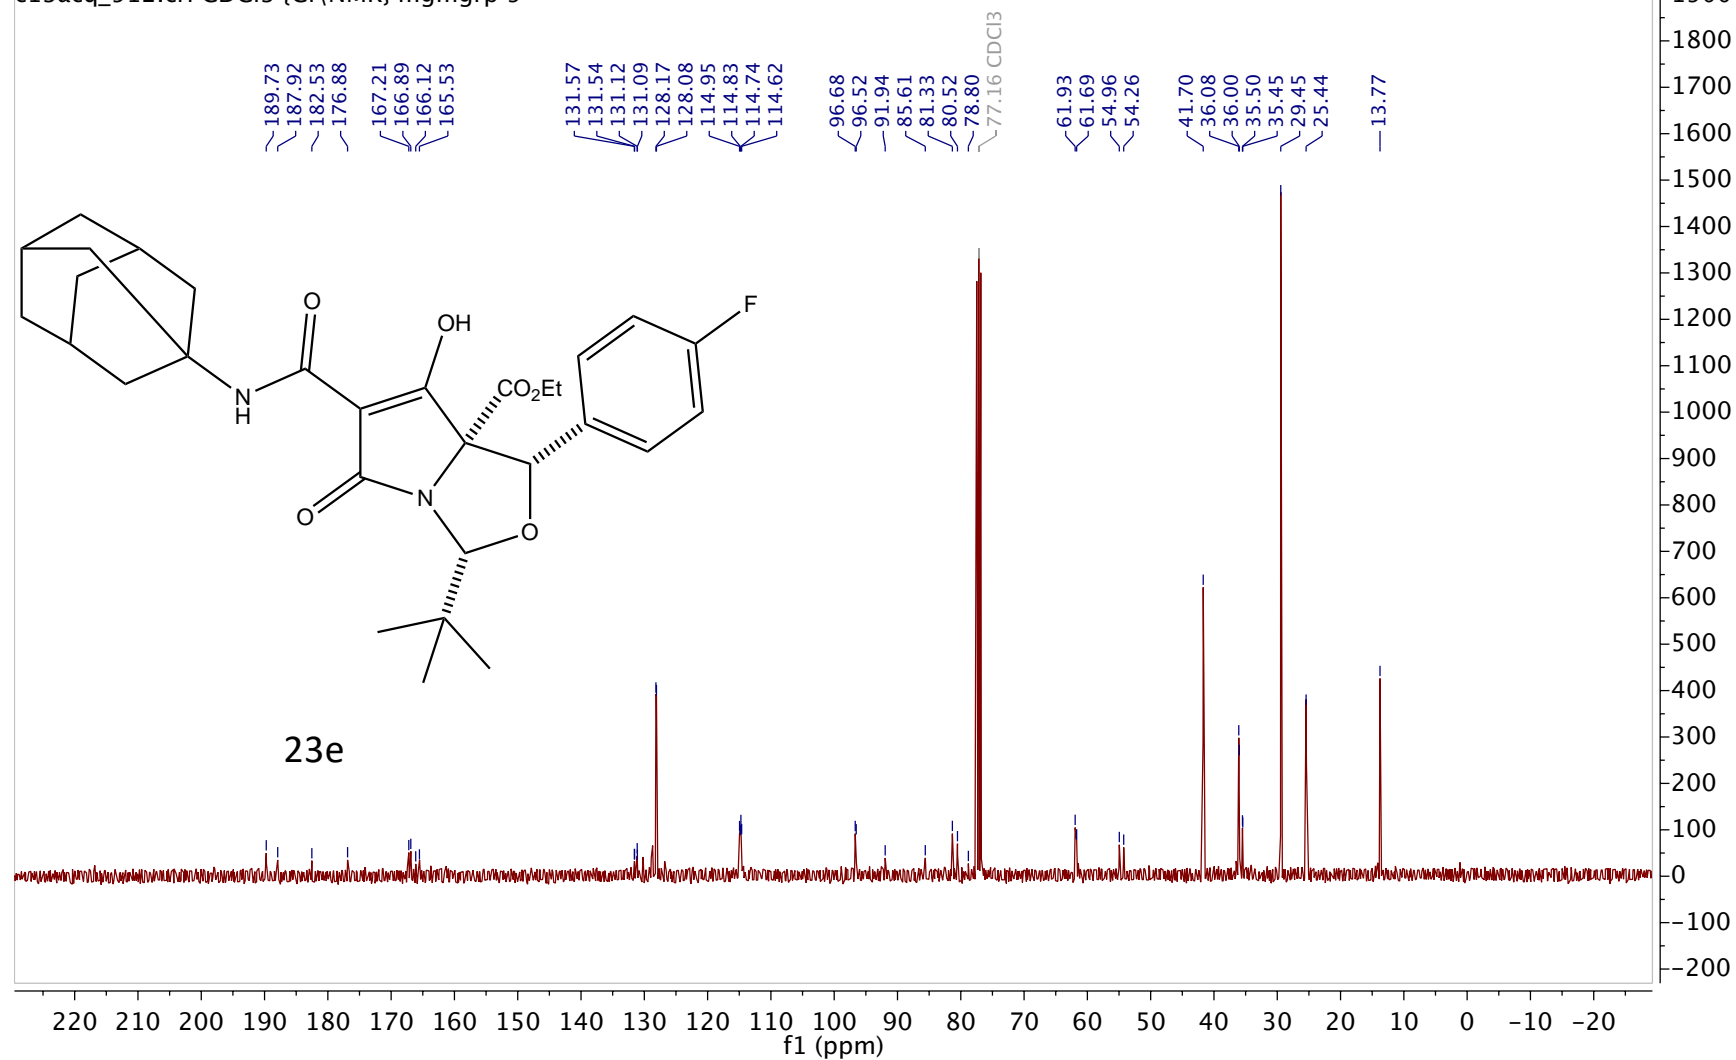



Oct23-2019-1-LS563(P) C1-C6.3.fid  
Instrument AVF400  
Chemist Liban Saney  
Group MGM  
Project Account Code DM7300  
f19dec\_256.crl CDCl3 {C:\NMR} mgmgrp 1

$^{19}\text{F}$  NMR (377 MHz,  $\text{CDCl}_3$ )

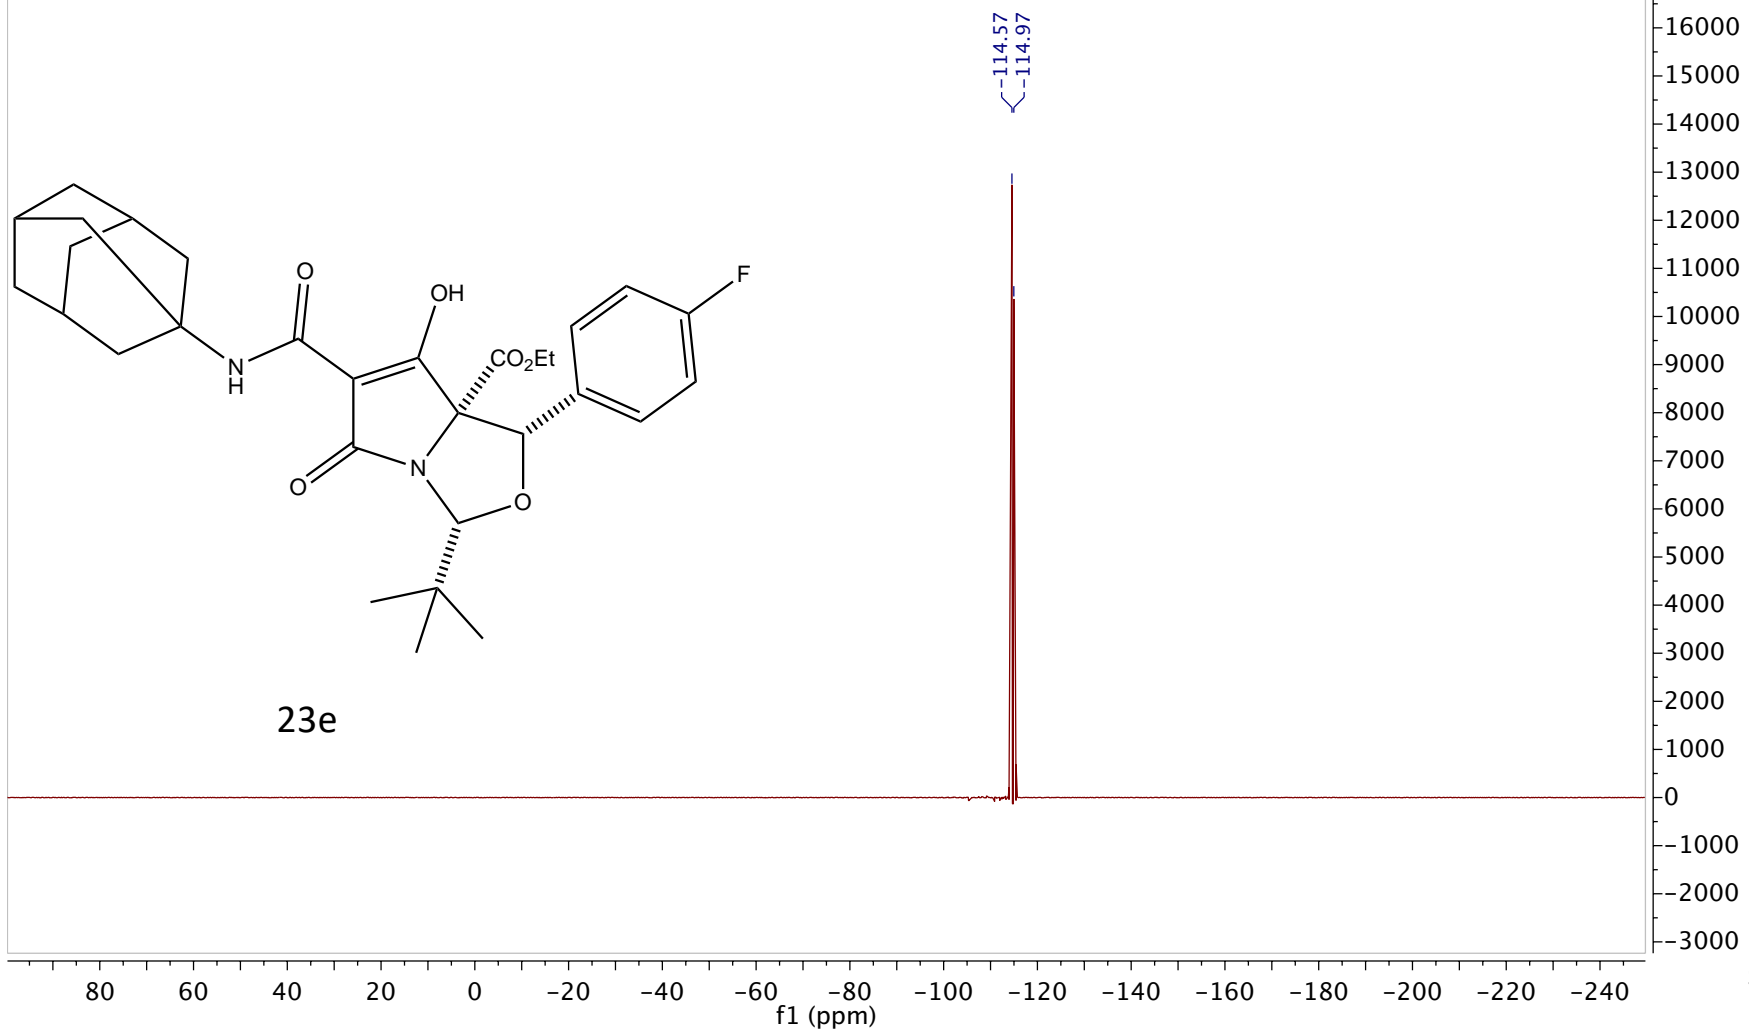

Oct23-2019-1-LS564(P) B2-E3.1.fid  
Instrument AVF400  
Chemist Liban Saney  
Group MGM  
Project Account Code DM7300  
h1acq.crl CDCl3 {C:\NMR} mgmgrp 1

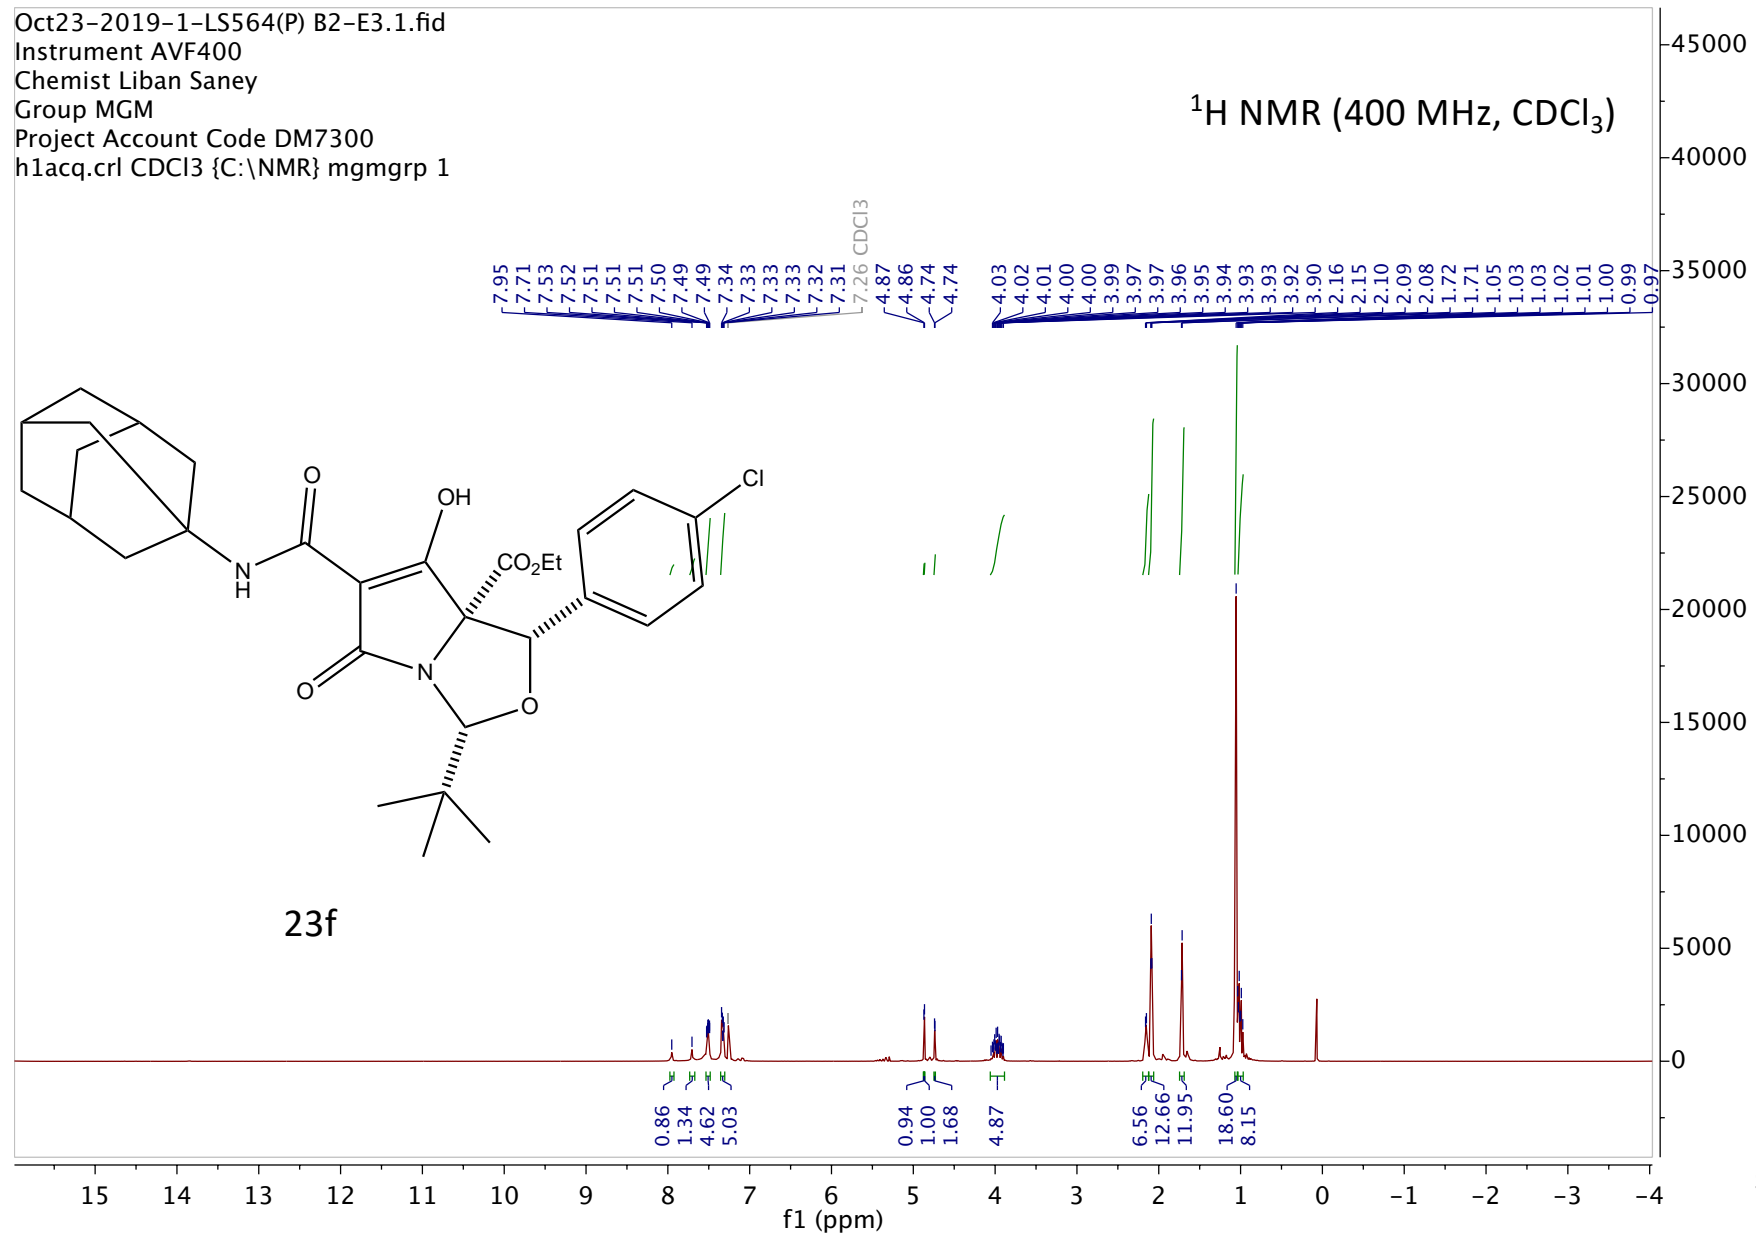

Oct23-2019-1-LS564(P) B2-E3.4.fid  
Instrument AVF400  
Chemist Liban Saney  
Group MGM  
Project Account Code DM7300  
c13acq\_512.crl CDCl3 {C:\NMR} mgmgrp 1

<sup>13</sup>C NMR (101 MHz, CDCl<sub>3</sub>)

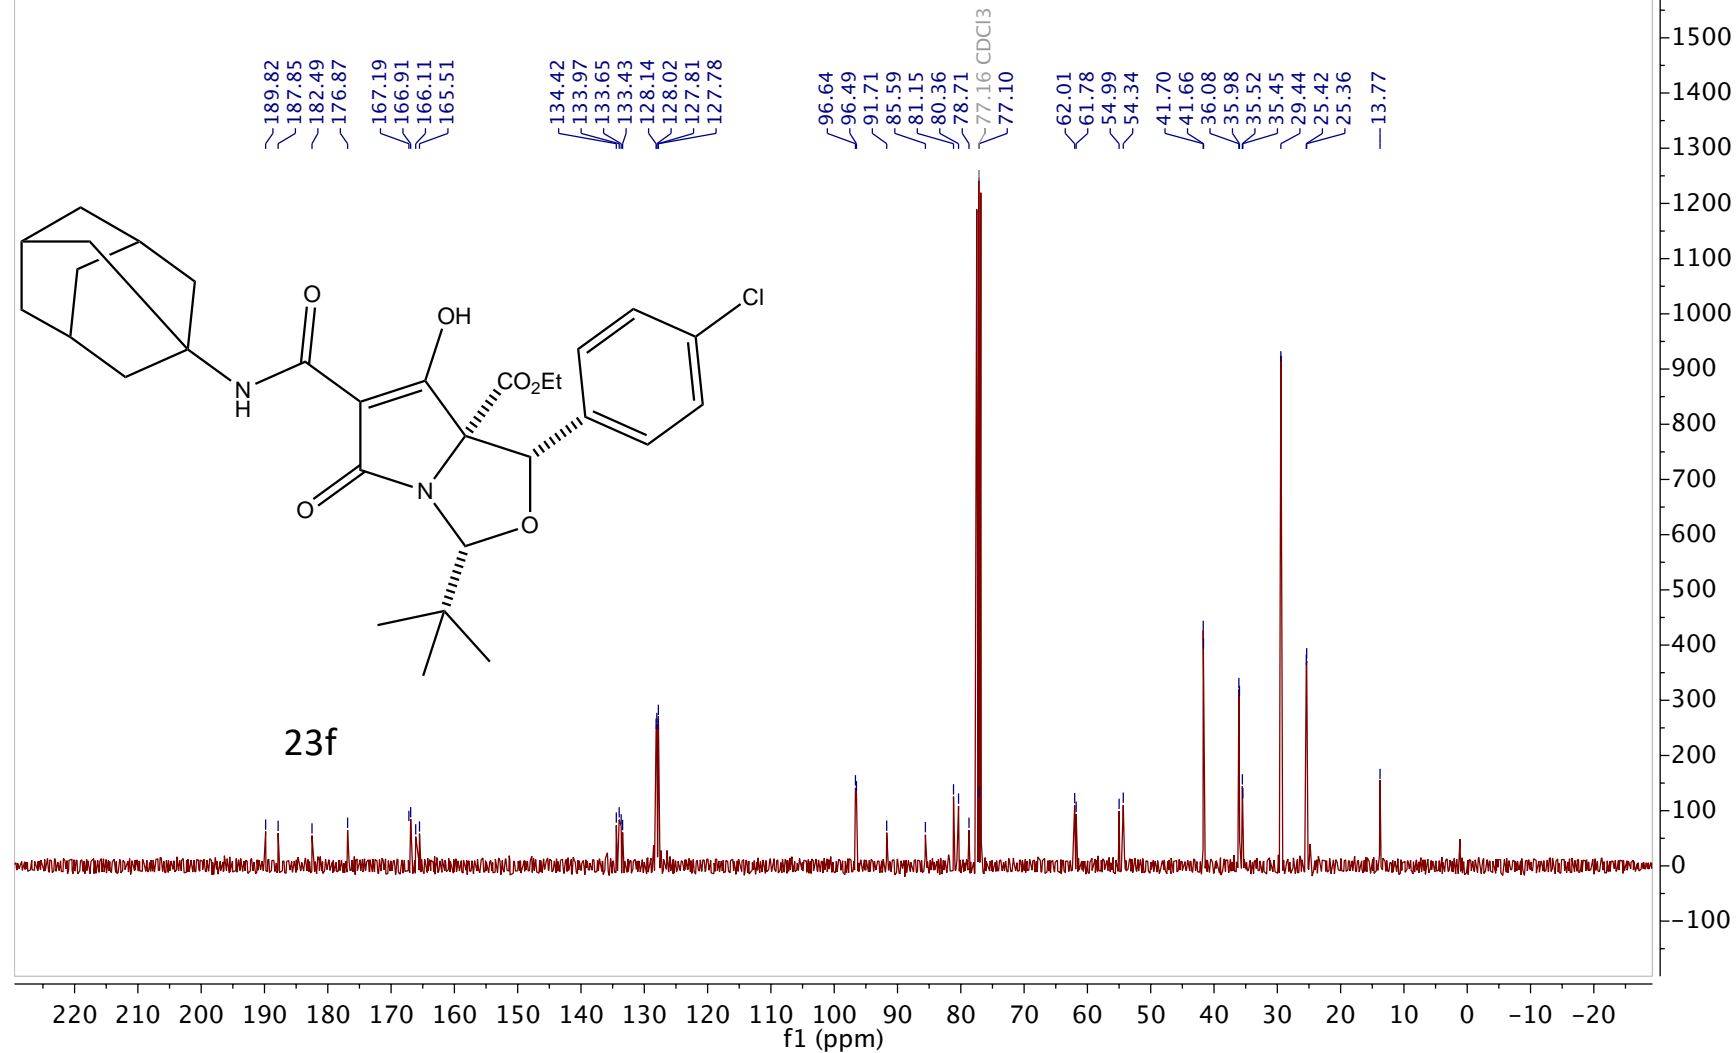

Sep26-2020-1-LS767(P) D4-I3.1.fid  
Instrument AVH400  
Group MGM  
Chemist Liban Saney  
Project Account Code DM7300  
h1acq.crl CDCl3 {C:\NMR} mgmgrp 1

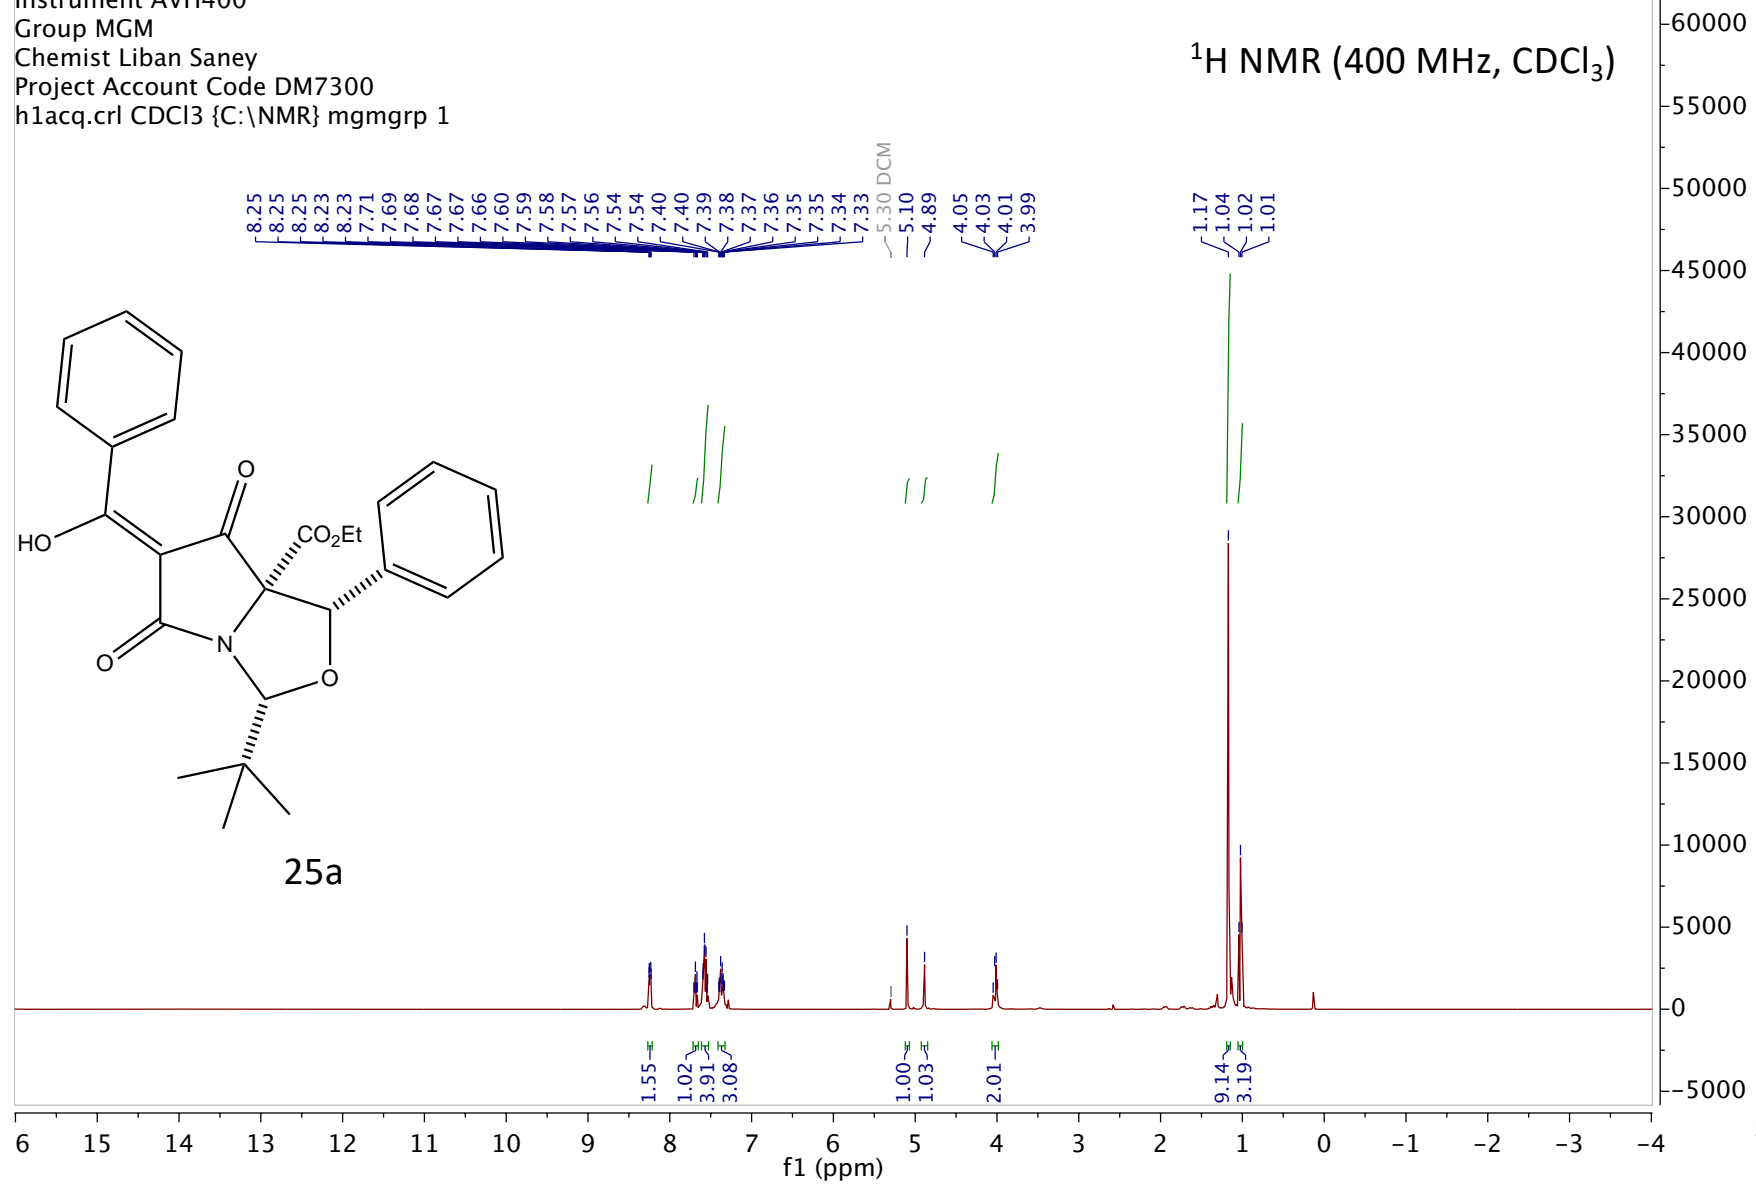

Sep26-2020-1-LS767(P) D4-13.4.fid  
Instrument AVH400  
Group MGM  
Chemist Liban Saney  
Project Account Code DM7300  
c13acq\_512.crl CDCl3 {C:\NMR} mgmgrp 1

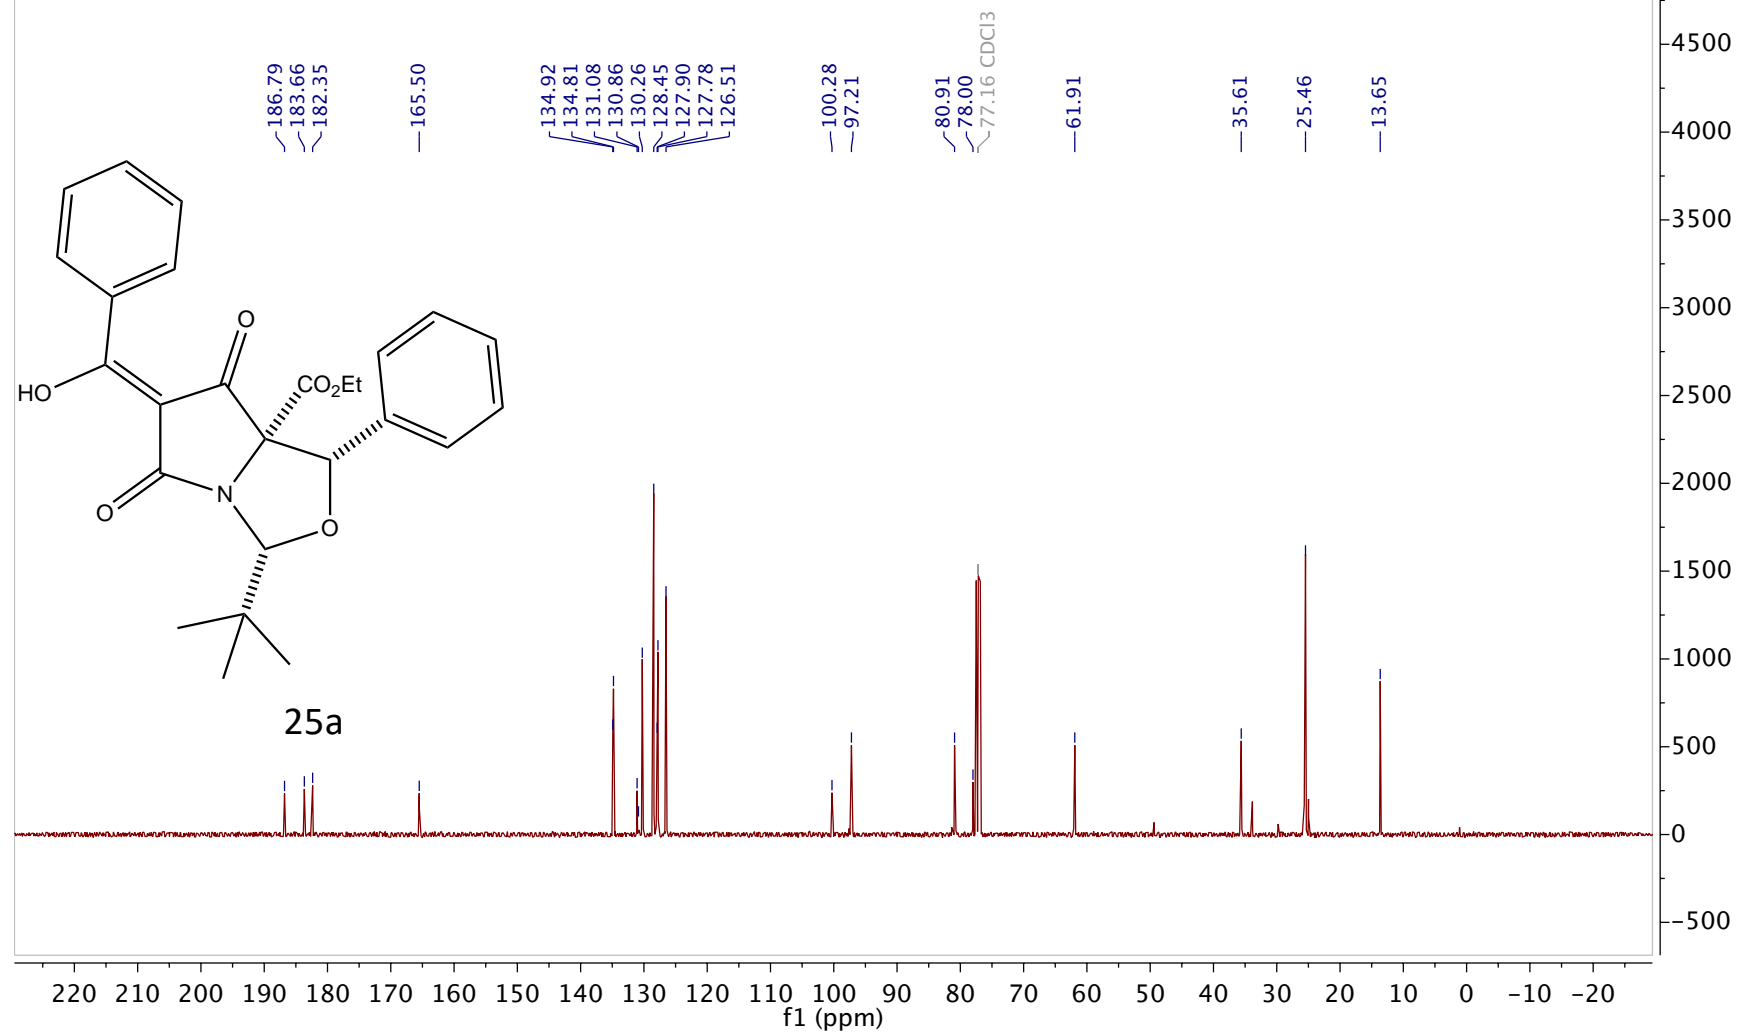

Sep26-2020-59-LS770(P) A4-E1.1.fid  
Instrument AVH400  
Group MGM  
Chemist Liban Saney  
Project Account Code DM7300  
h1acq.crl CDCl3 {C:\NMR} mgmgrp 59

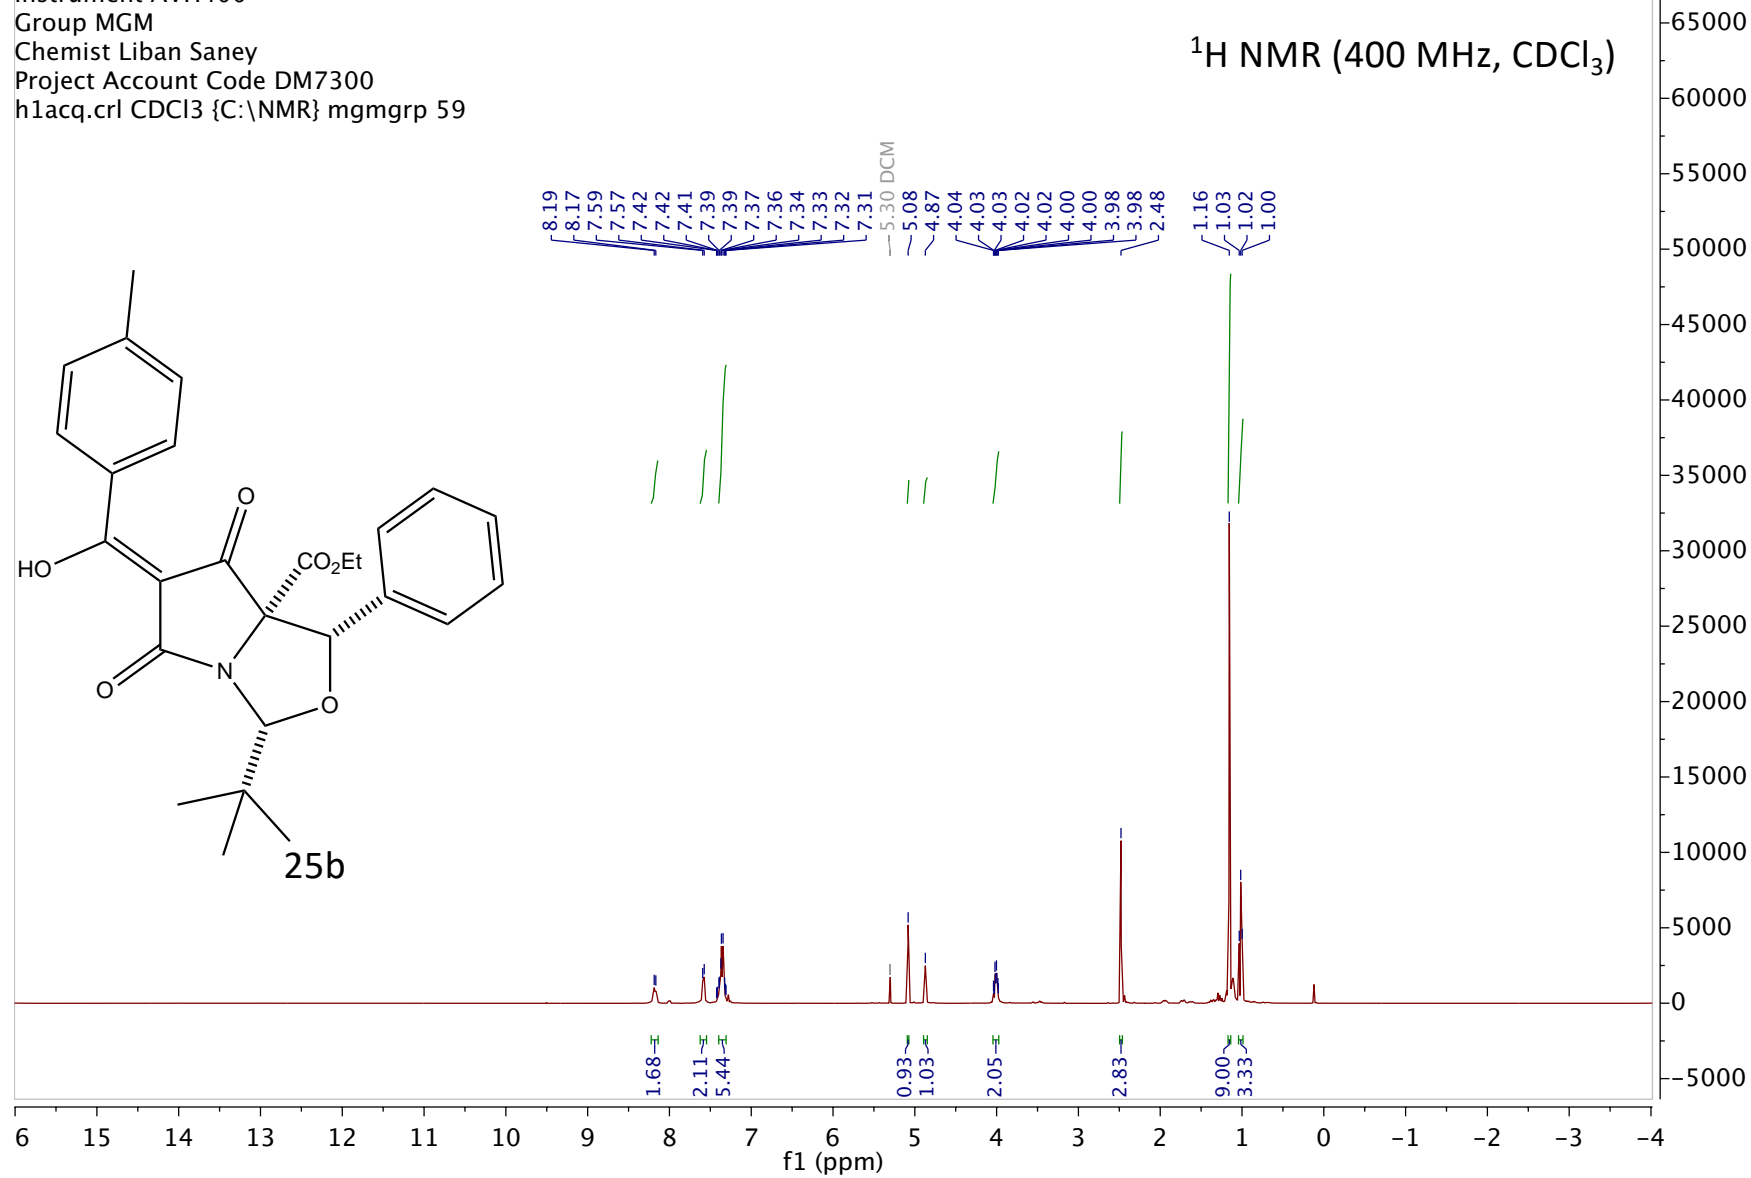

Sep26-2020-59-LS770(P) A4-E1.4.fid  
Instrument AVH400  
Group MGM  
Chemist Liban Saney  
Project Account Code DM7300  
c13acq\_512.crl CDCl3 {C:\NMR} mgmgrp 59

<sup>13</sup>C NMR (101 MHz, CDCl<sub>3</sub>)

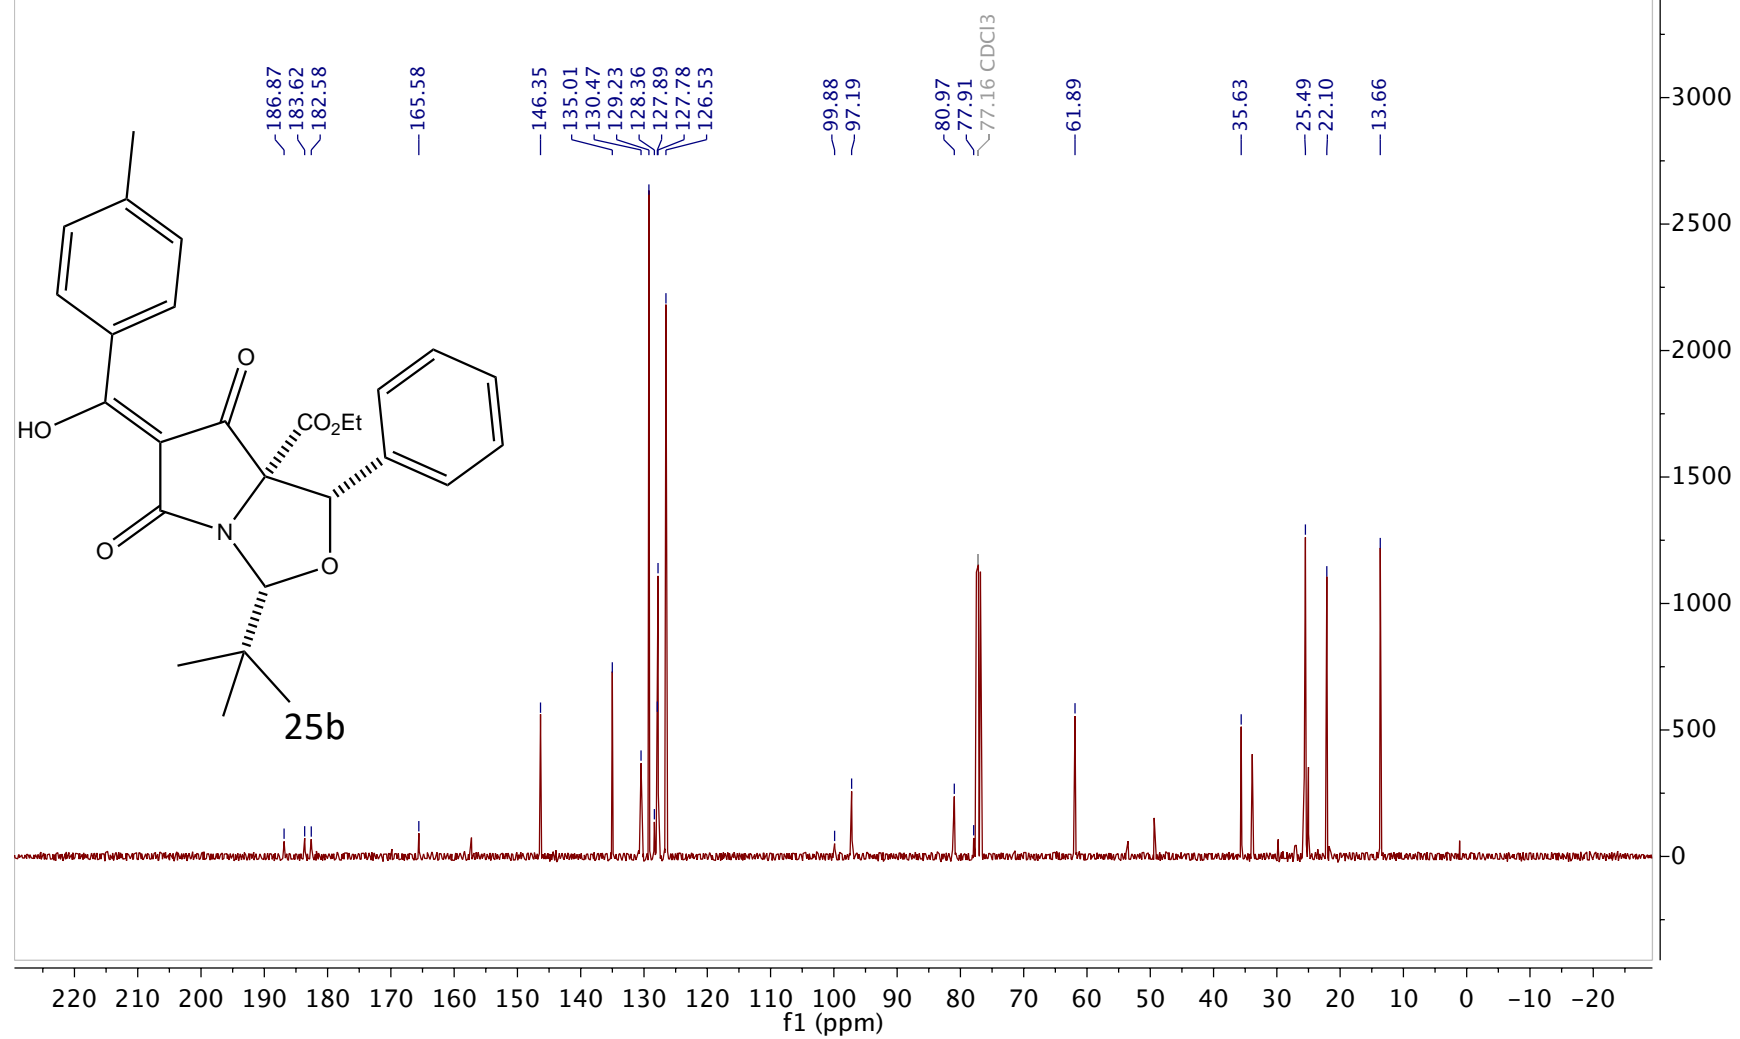

Sep28-2020-1-LS771(P) B4-F1.1.fid  
Instrument AVH400  
Group MGM  
Chemist Liban Saney  
Project Account Code DM7300  
h1acq.crl CDCl3 {C:\NMR} mgmgrp 1

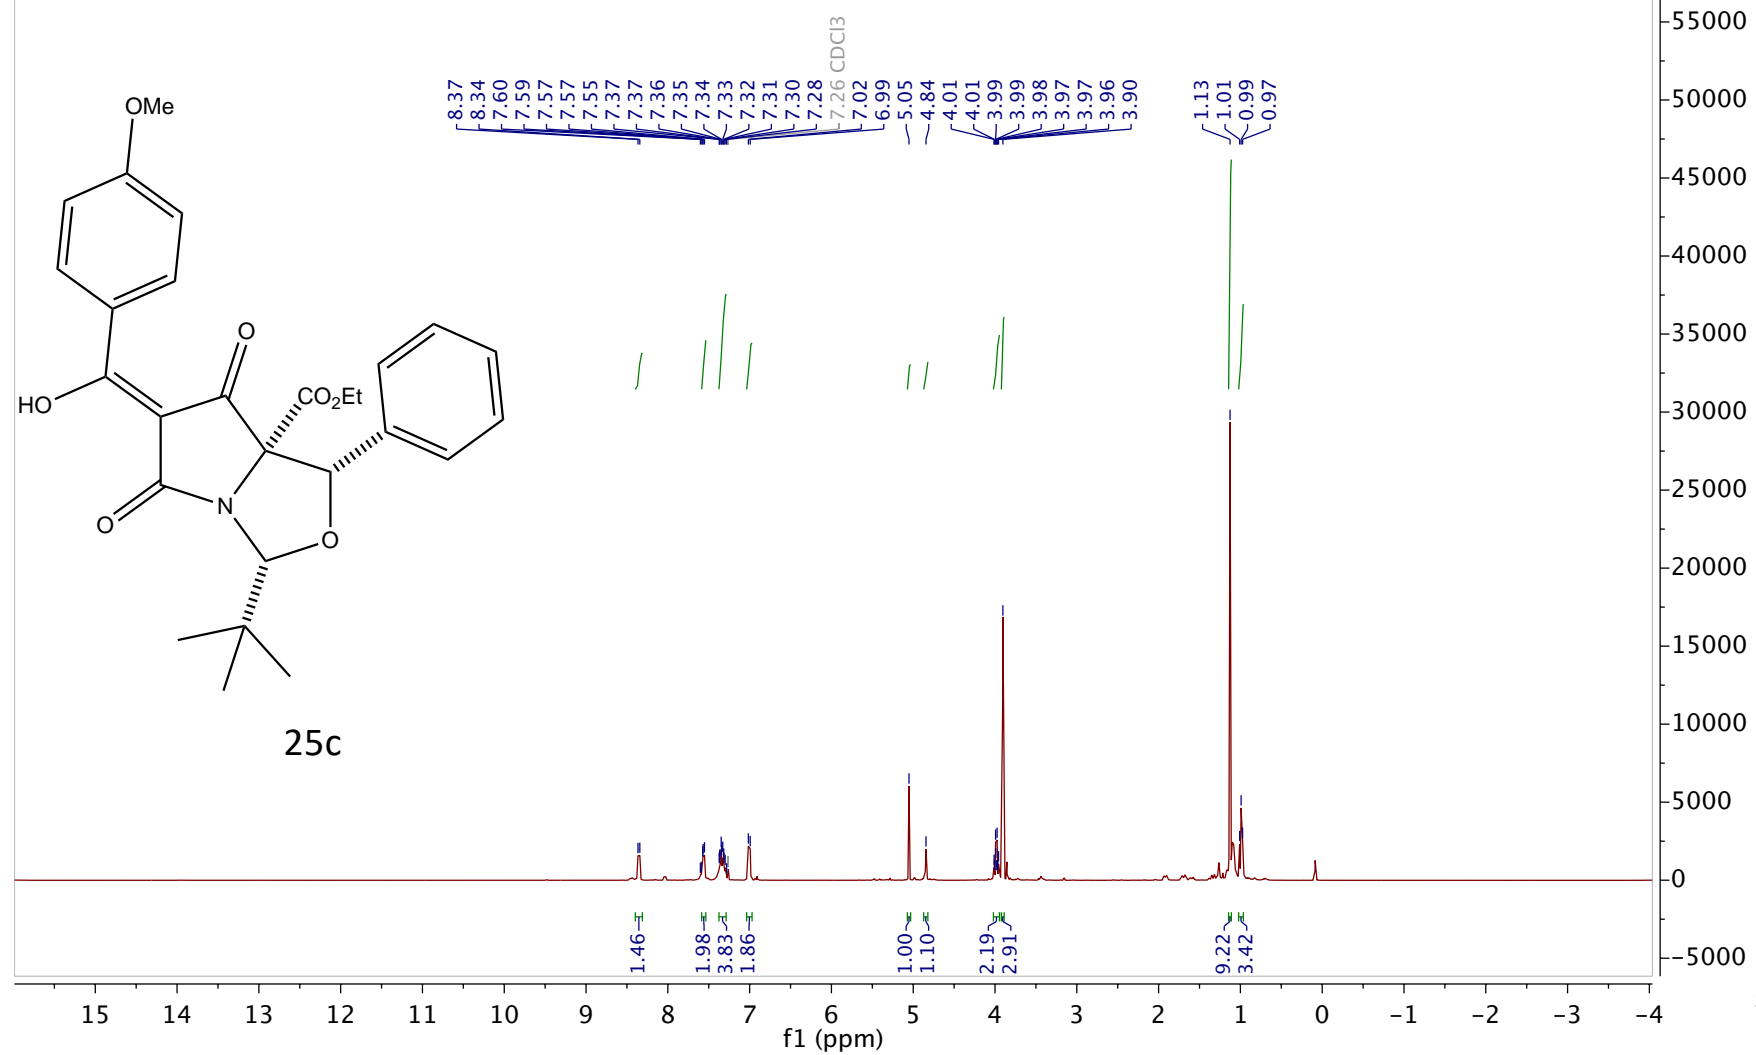



Sep28-2020-1-LS771(P) B4-F1.4.fid  
Instrument AVH400  
Group MGM  
Chemist Liban Saney  
Project Account Code DM7300  
c13acq\_512.crl CDCl3 {C:\NMR} mgmgrp 1

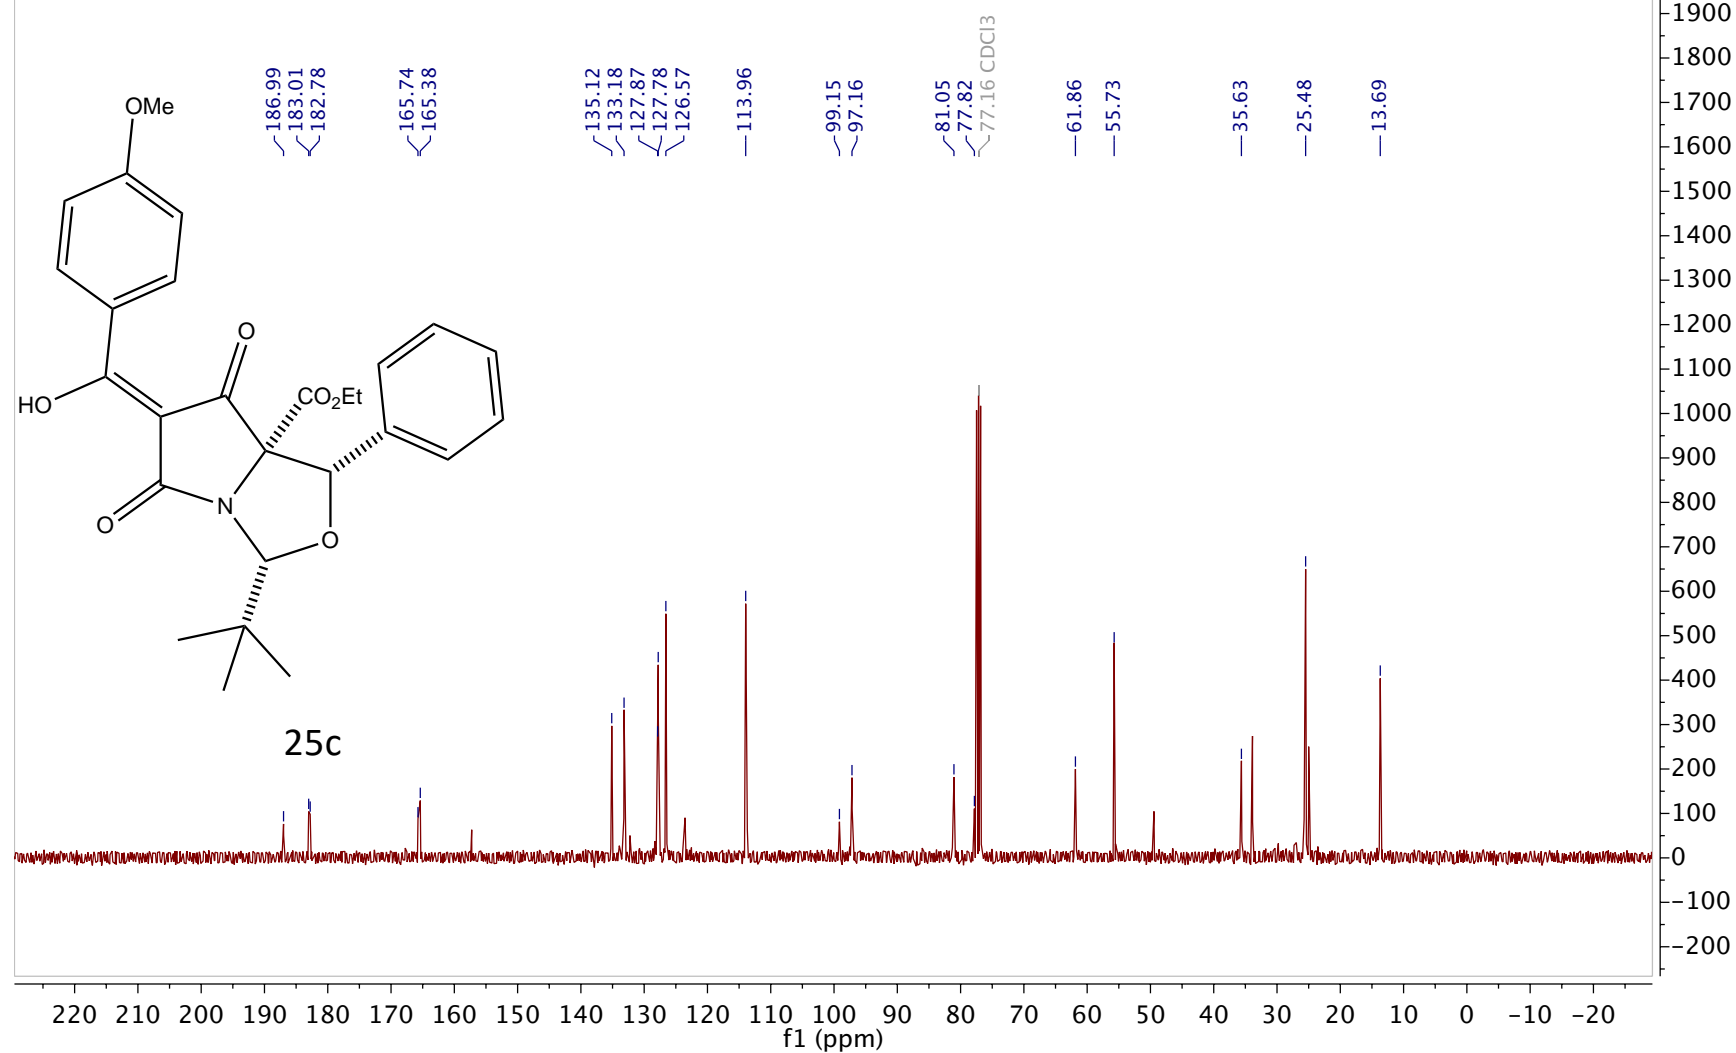

Oct03-2020-1-LS777(P) C4-H5.1.fid  
Instrument AVH400  
Group MGM  
Chemist Liban Saney  
Project Account Code DM7300  
h1acq.crl CDCl3 {C:\NMR} mgmgrp 1

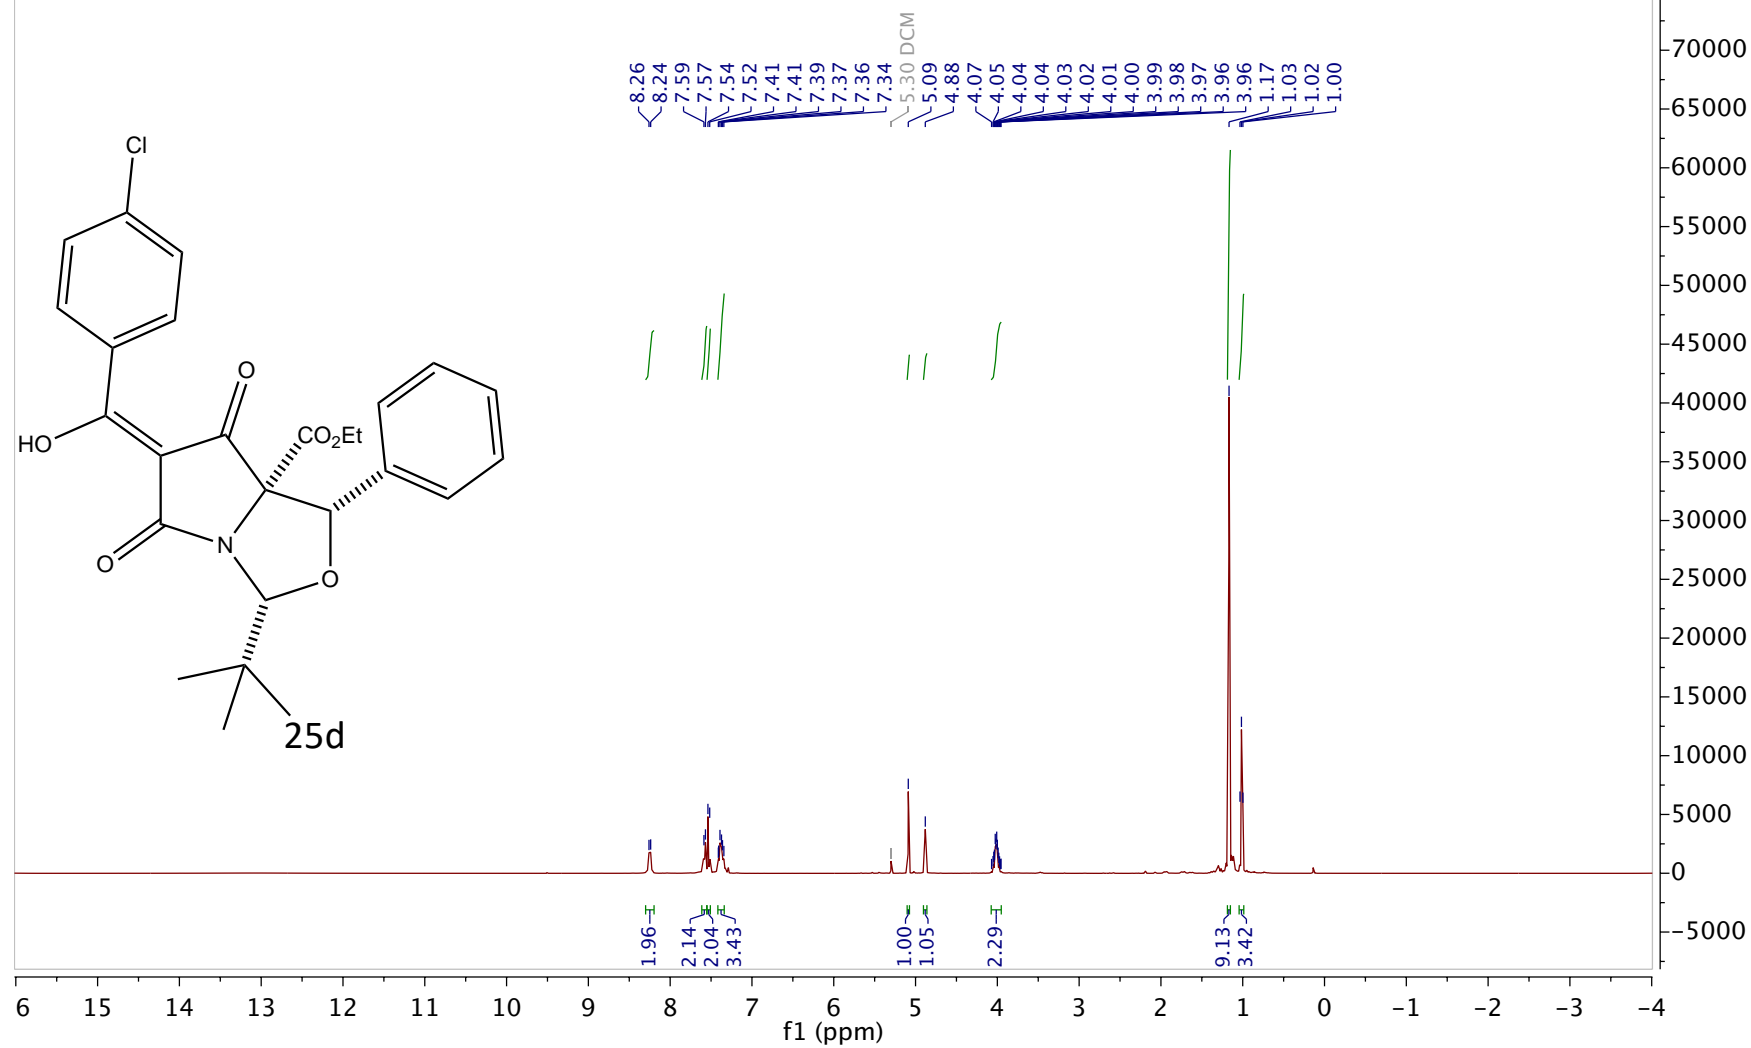

Oct03-2020-1-LS777(P) C4-H5.4.fid  
Instrument AVH400  
Group MGM  
Chemist Liban Saney  
Project Account Code DM7300  
c13acq\_512.crl CDCl3 {C:\NMR} mgmgrp 1

<sup>13</sup>C NMR (101 MHz, CDCl<sub>3</sub>)

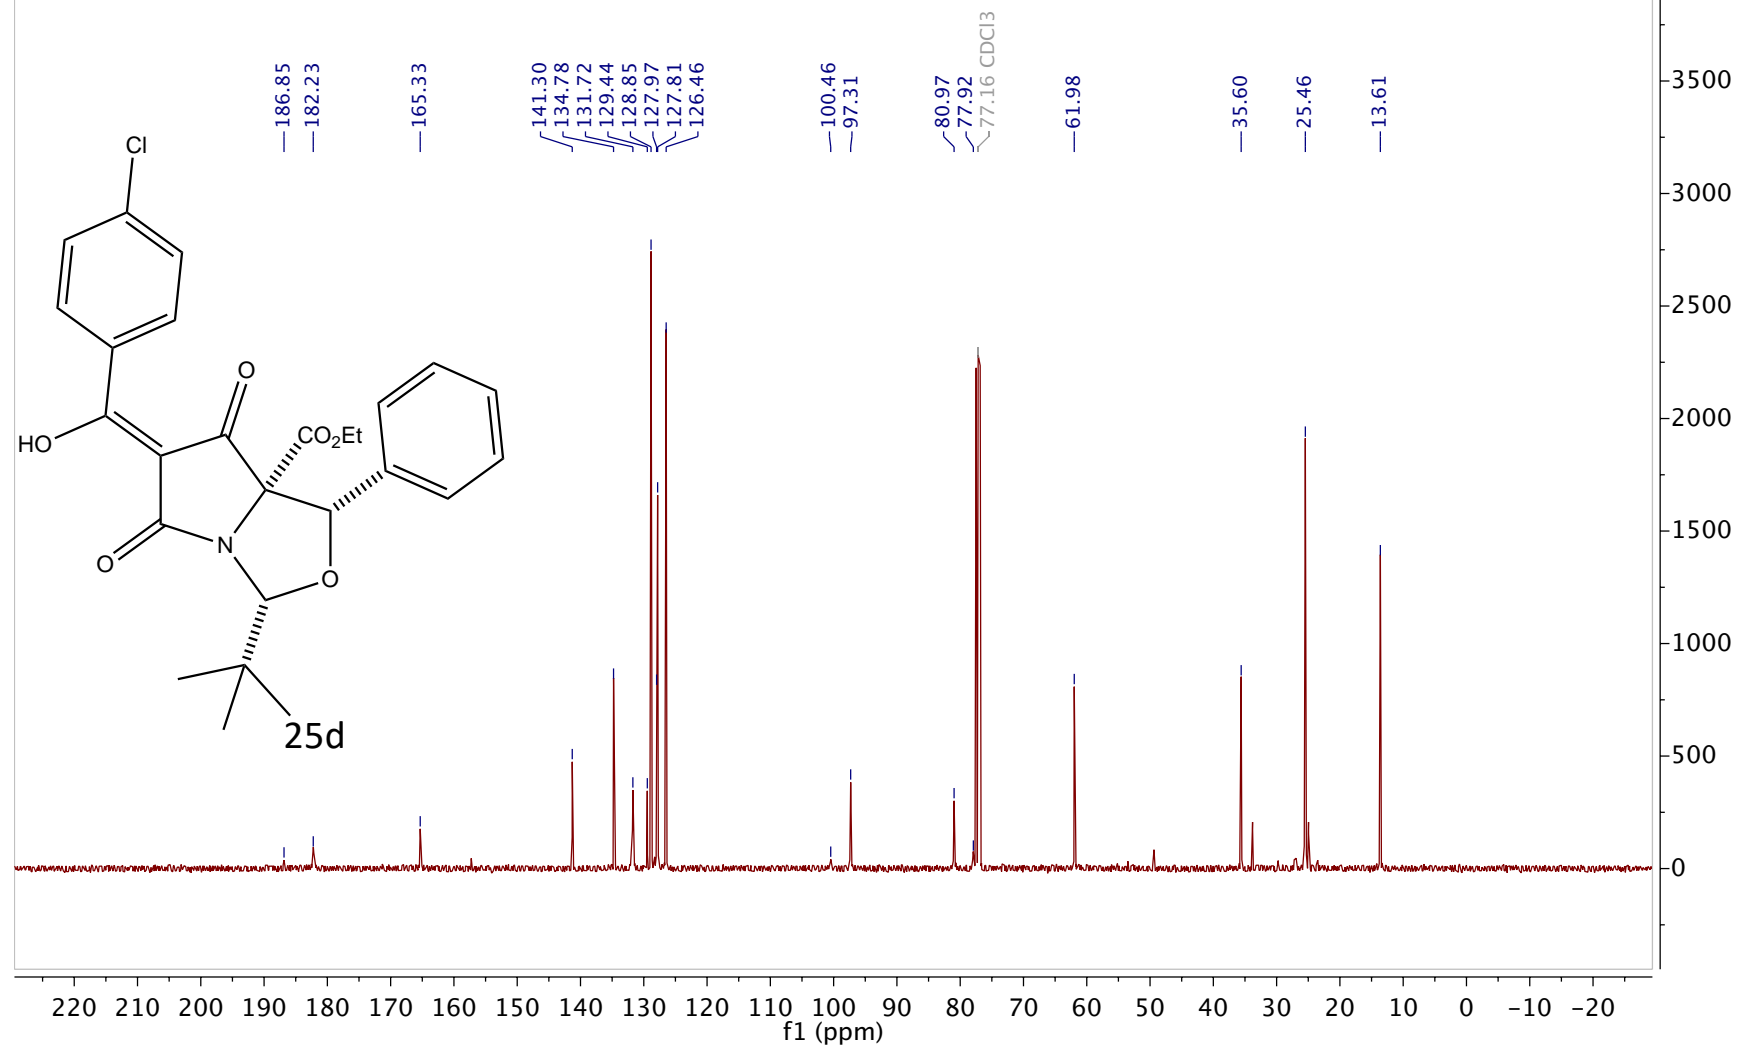

Sep29-2020-60-LS772(P) B4-G1.1.fid  
Instrument AVH400  
Group MGM  
Chemist Liban Saney  
Project Account Code DM7300  
h1acq.crl CDCl3 {C:\NMR} mgmgrp 60

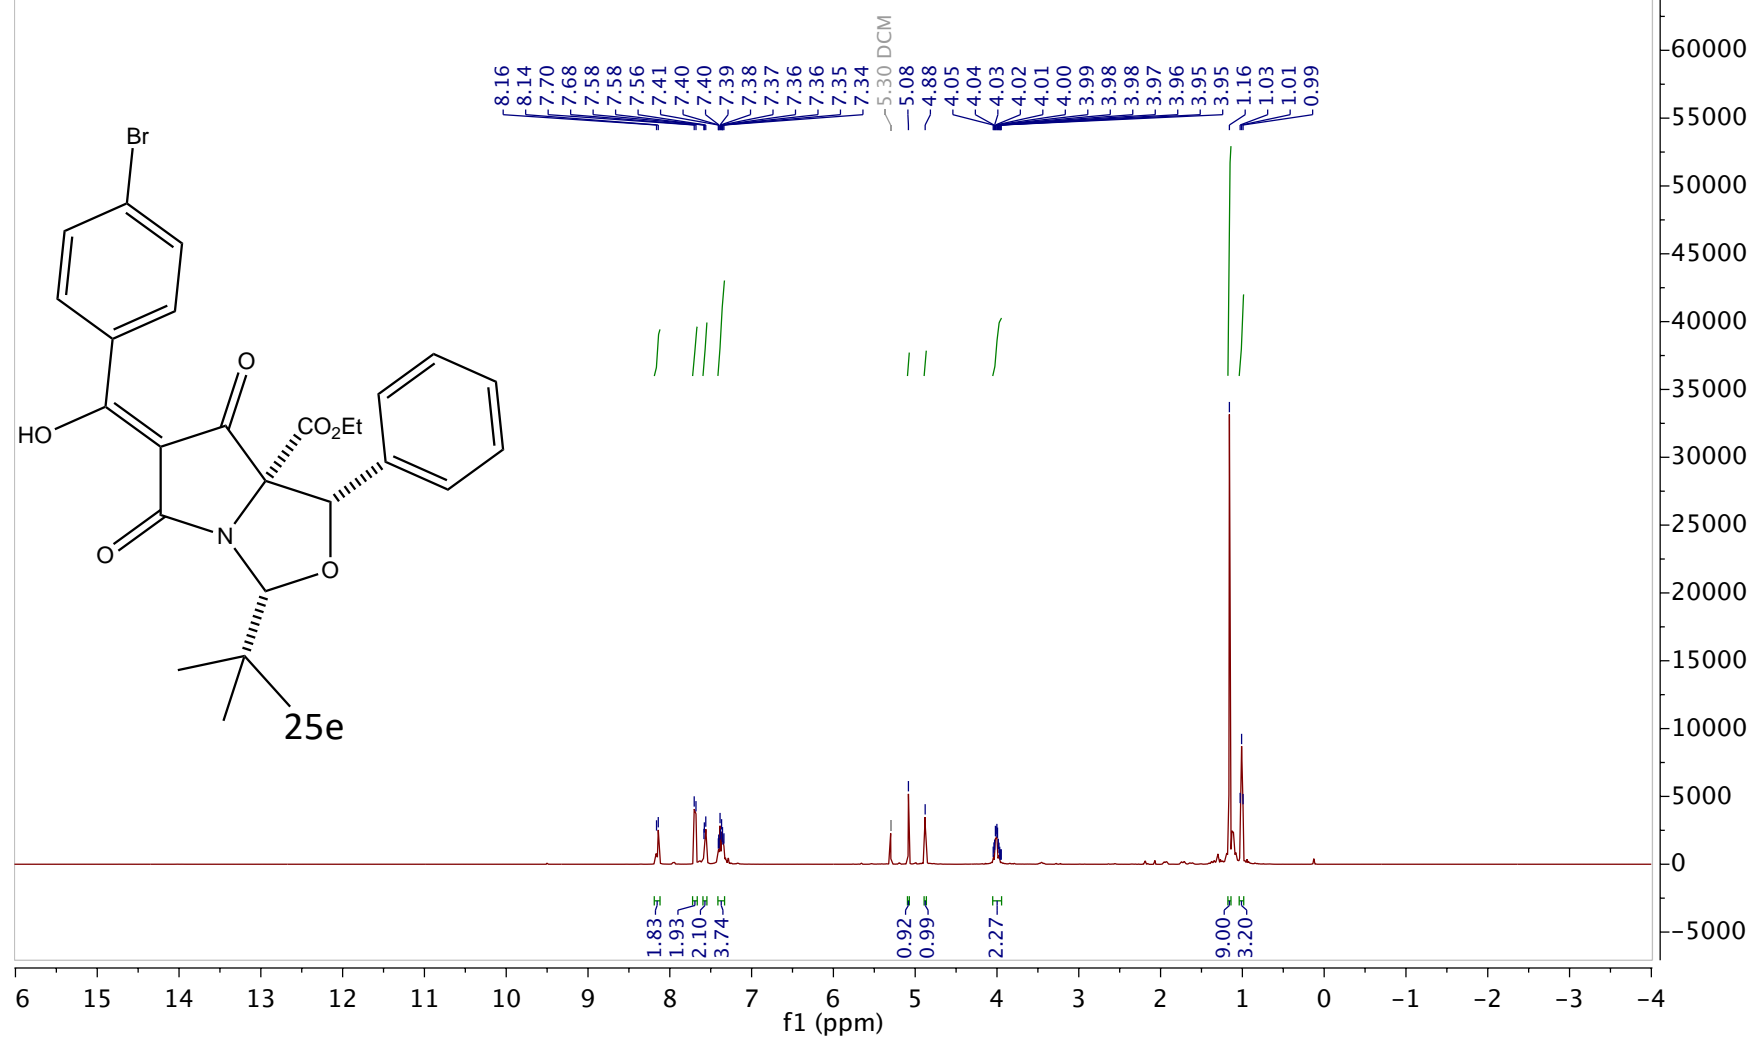

Sep29-2020-60-LS772(P) B4-G1.4.fid  
Instrument AVH400  
Group MGM  
Chemist Liban Saney  
Project Account Code DM7300  
c13acq\_512.crl CDCl3 {C:\NMR} mgmgrp 60

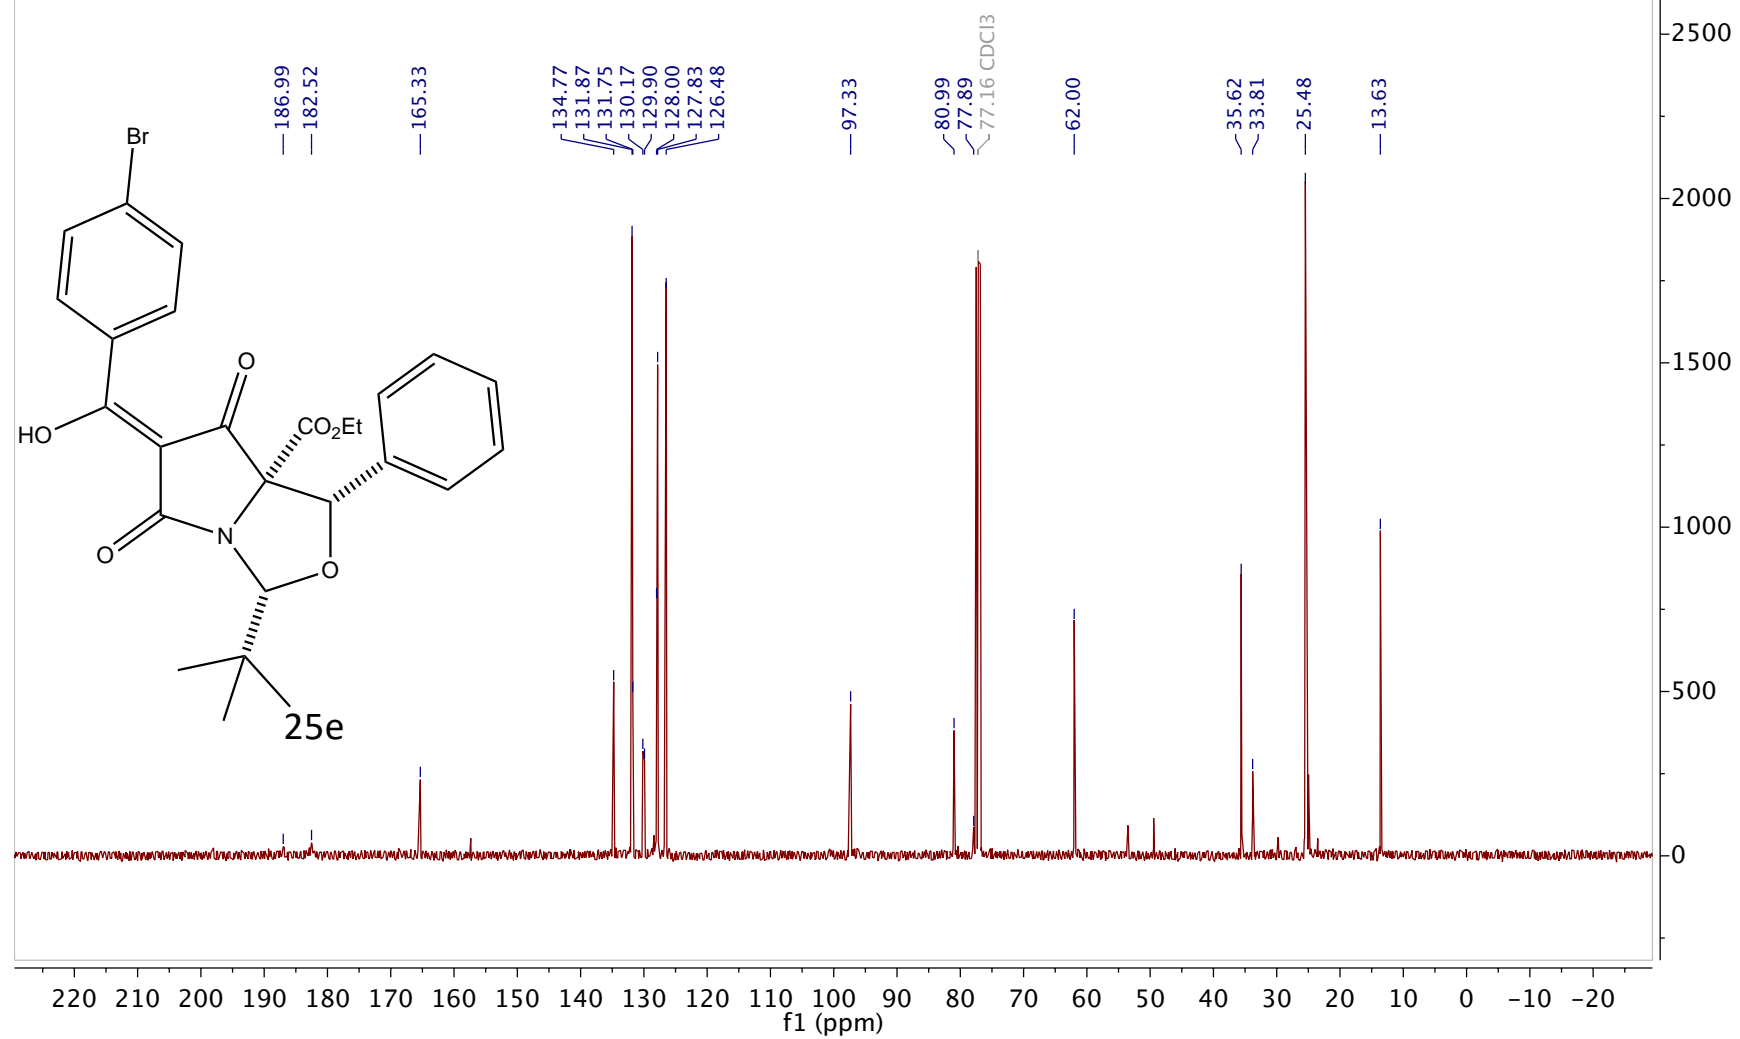

LS784(P) C3-G5.1.fid  
1H

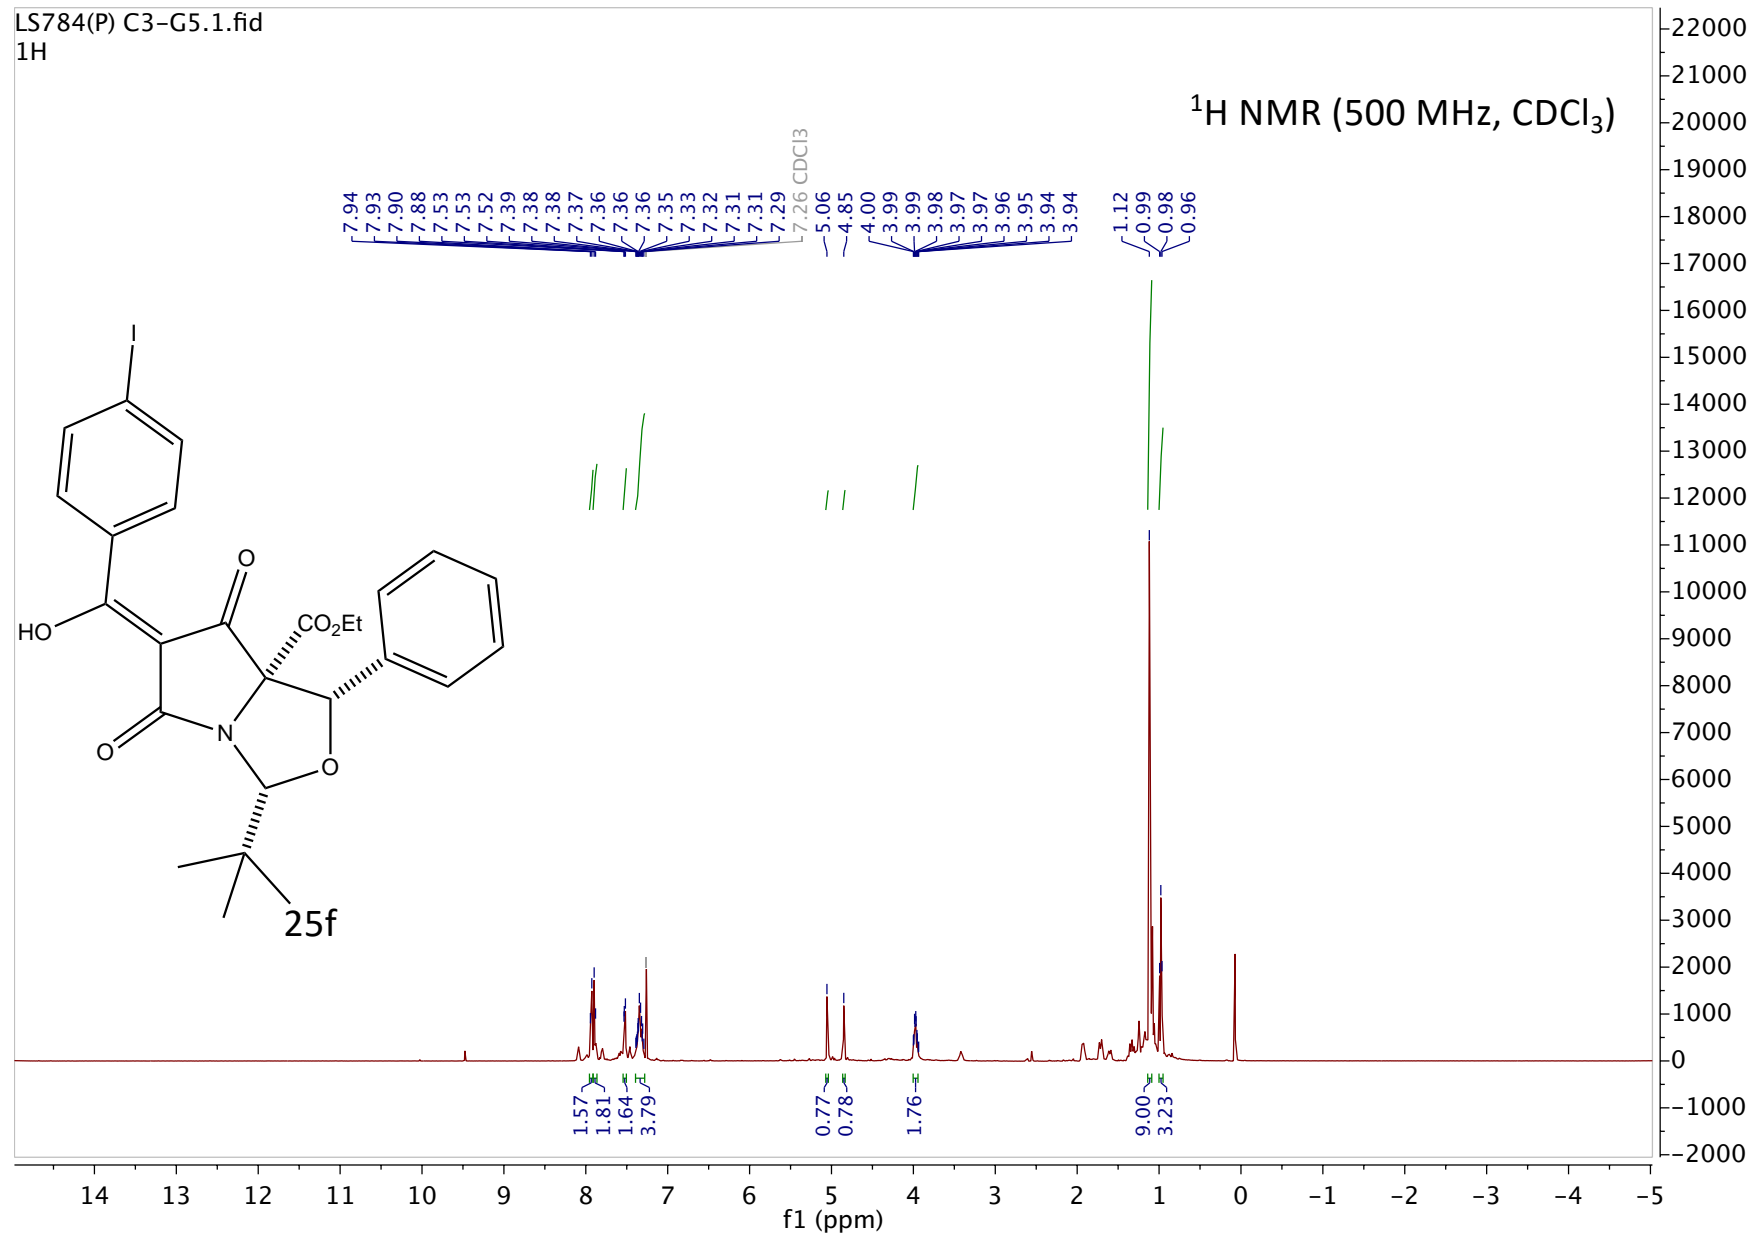

LS784(P) C3-G5.2.fid  
13C

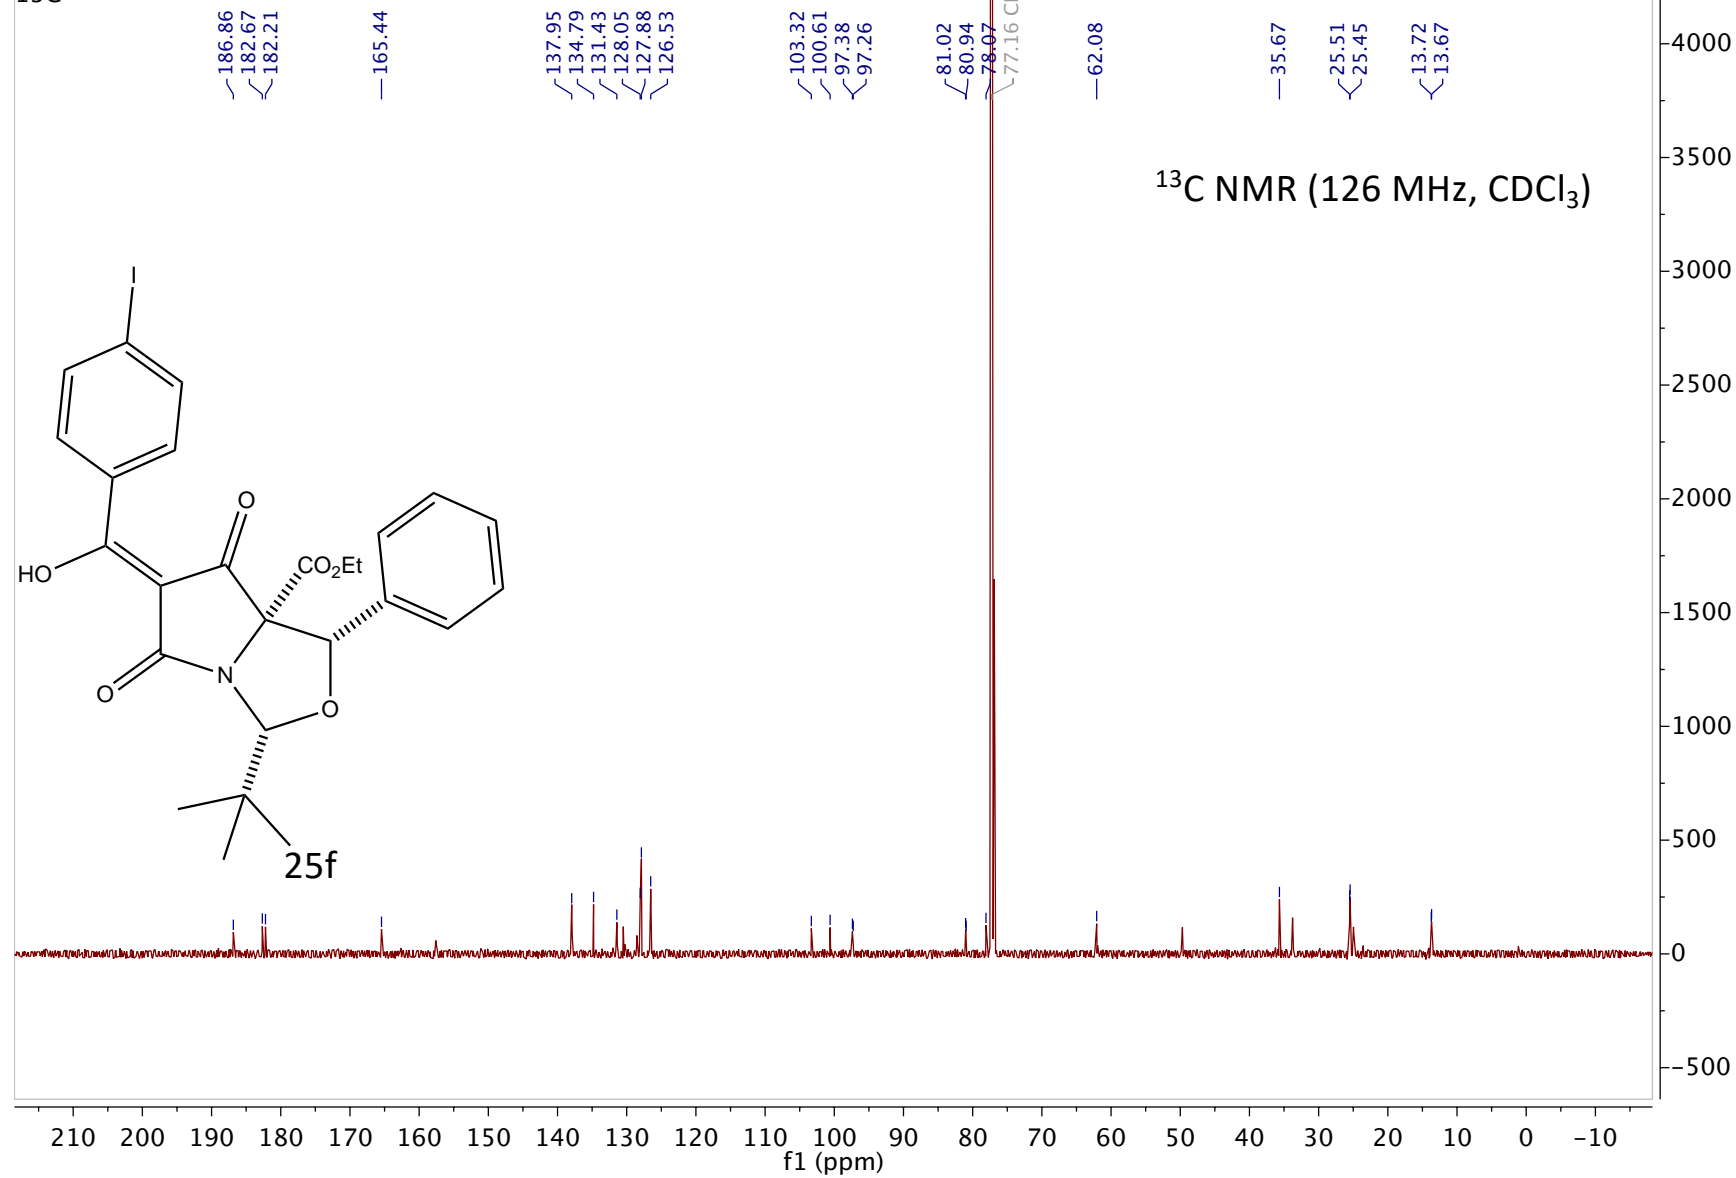

Oct06-2020-1-LS779(P) C4-D4+F1-H2.1.fid  
Instrument AVH400  
Group MGM  
Chemist Liban Saney  
Project Account Code DM7300  
h1acq.crl CDCl3 {C:\NMR} mgmgrp 1

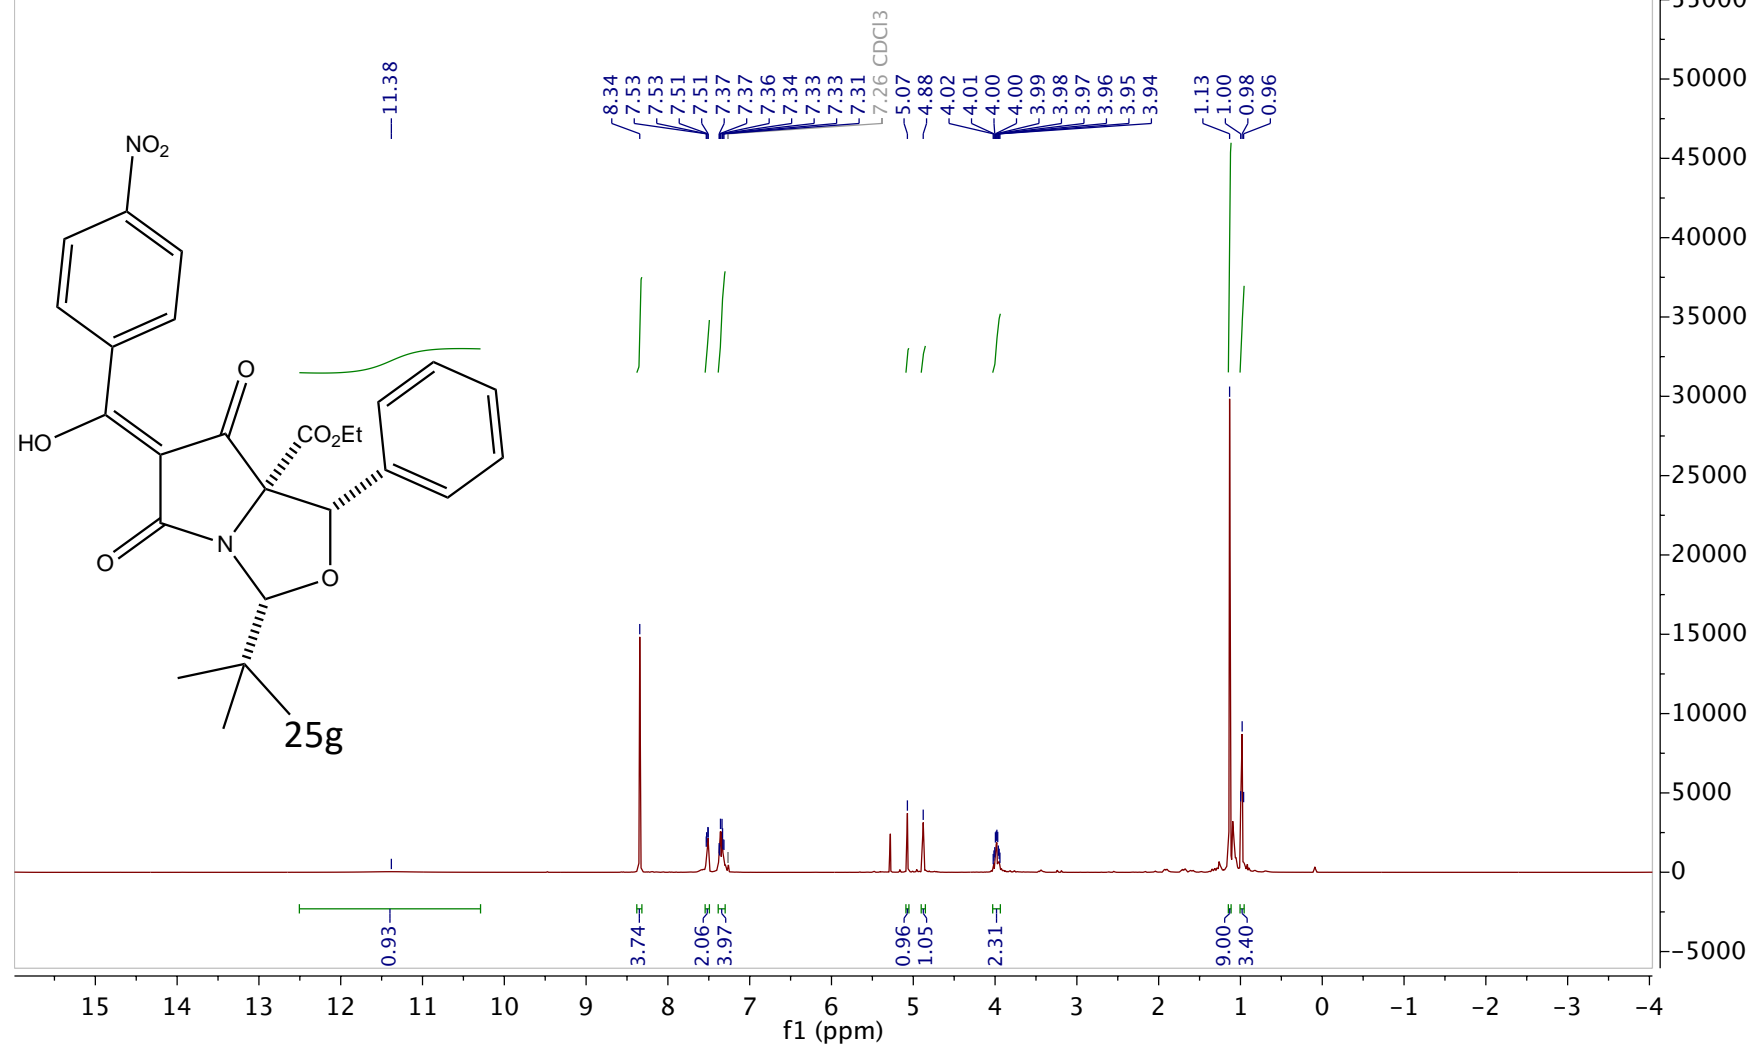



Oct06-2020-1-LS779(P) C4-D4+F1-H2.4.fid  
Instrument AVH400  
Group MGM  
Chemist Liban Saney  
Project Account Code DM7300  
c13acq\_512.crl CDCl3 {C:\NMR} mgmgrp 1

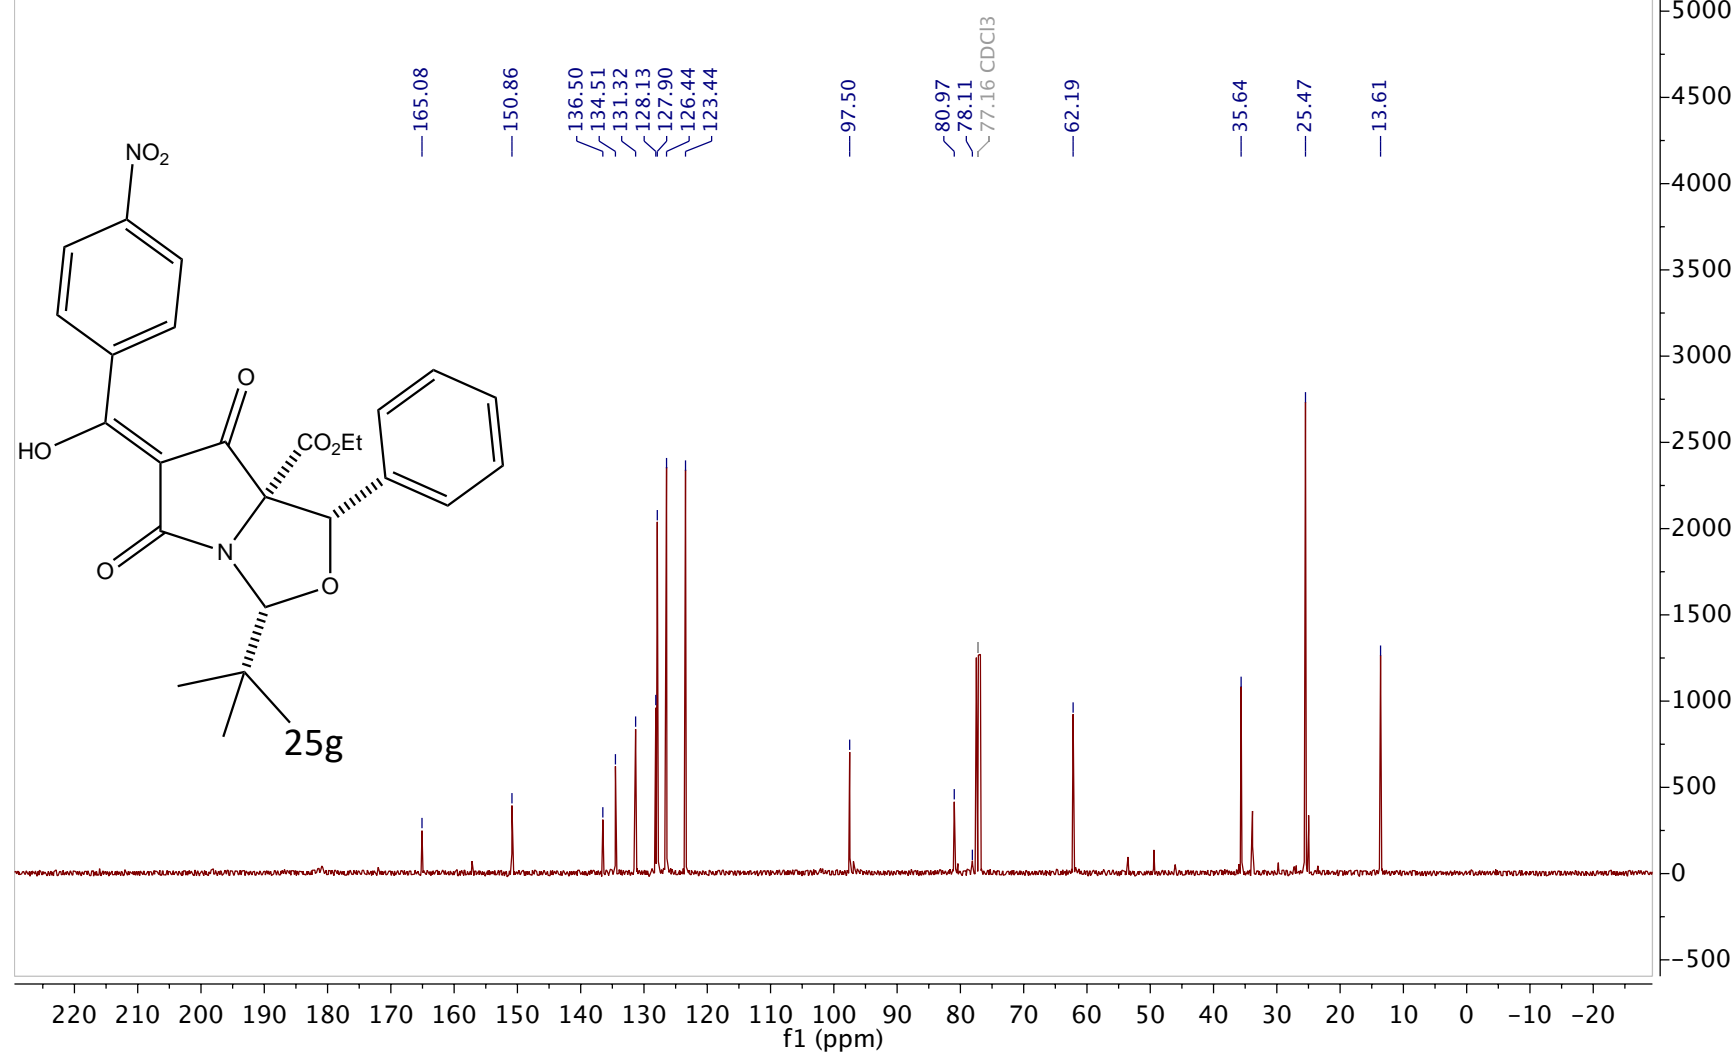

Oct09-2020-13-LS792(P) C3-H5.1.fid  
Instrument AVH400  
Group MGM  
Chemist Liban Saney  
Project Account Code DM7300  
h1acq.crl CDCl3 {C:\NMR} mgmgrp 13

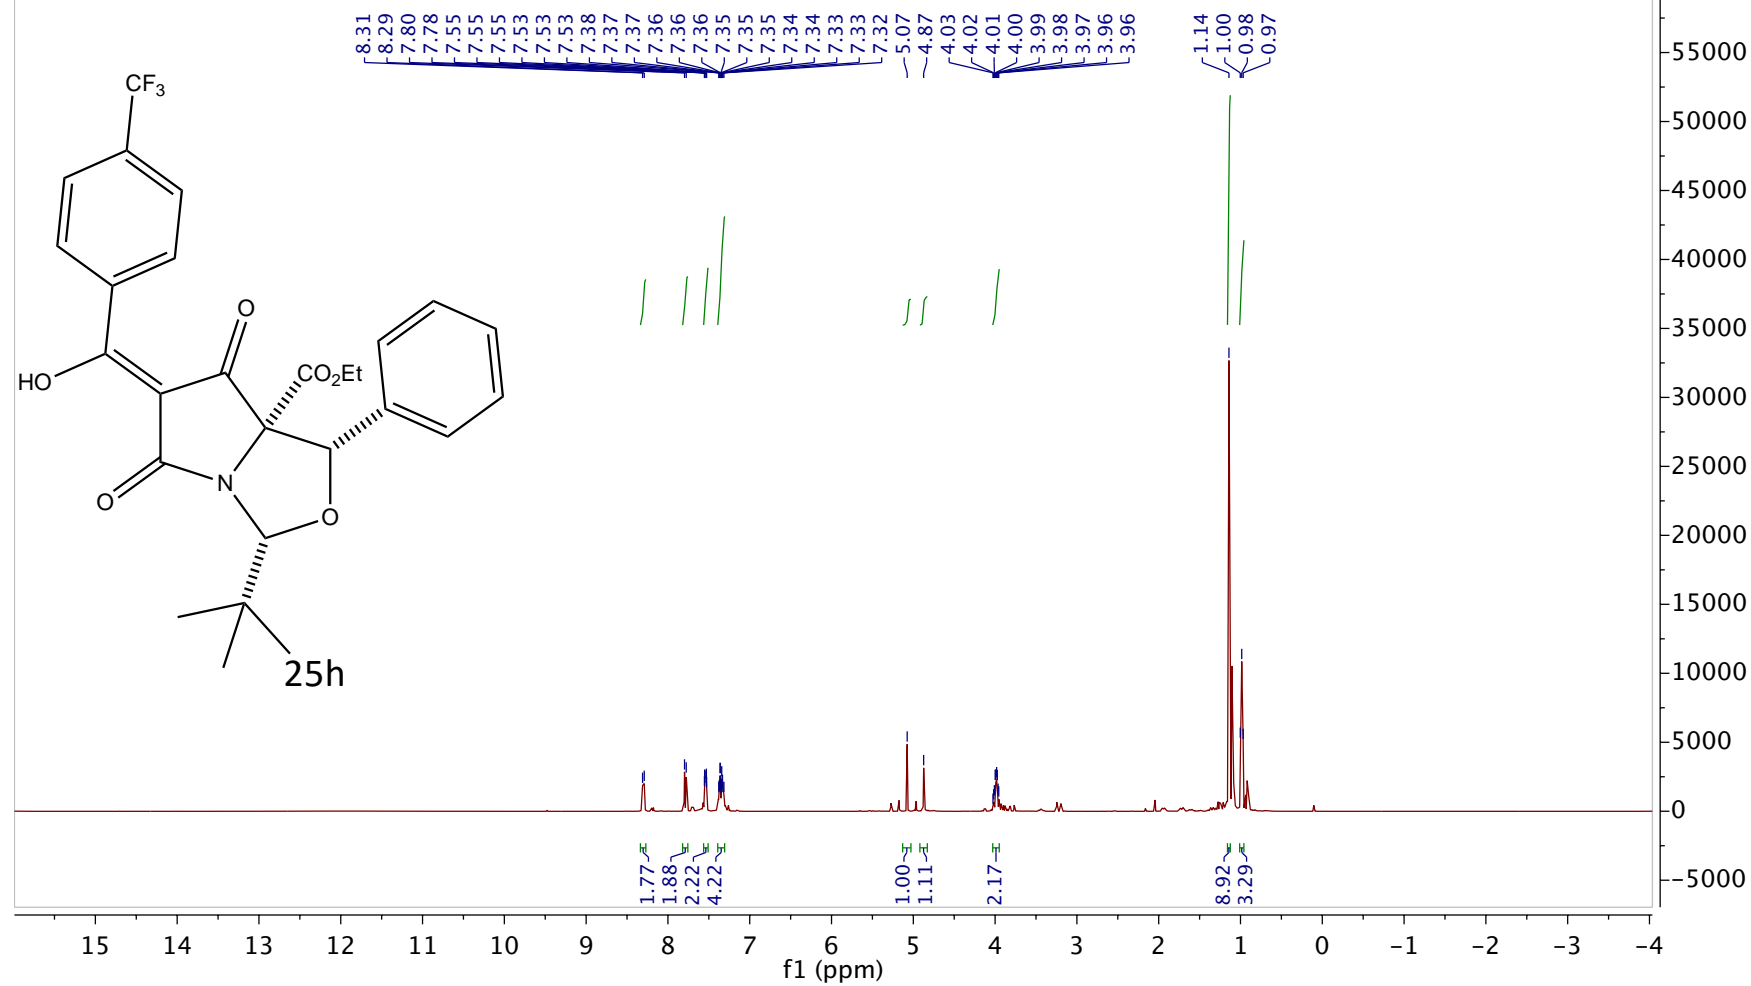

Oct09-2020-13-LS792(P) C3-H5.4.fid  
Instrument AVH400  
Group MGM  
Chemist Liban Saney  
Project Account Code DM7300  
c13acq\_512.crl CDCl3 {C:\NMR} mgmgrp 13

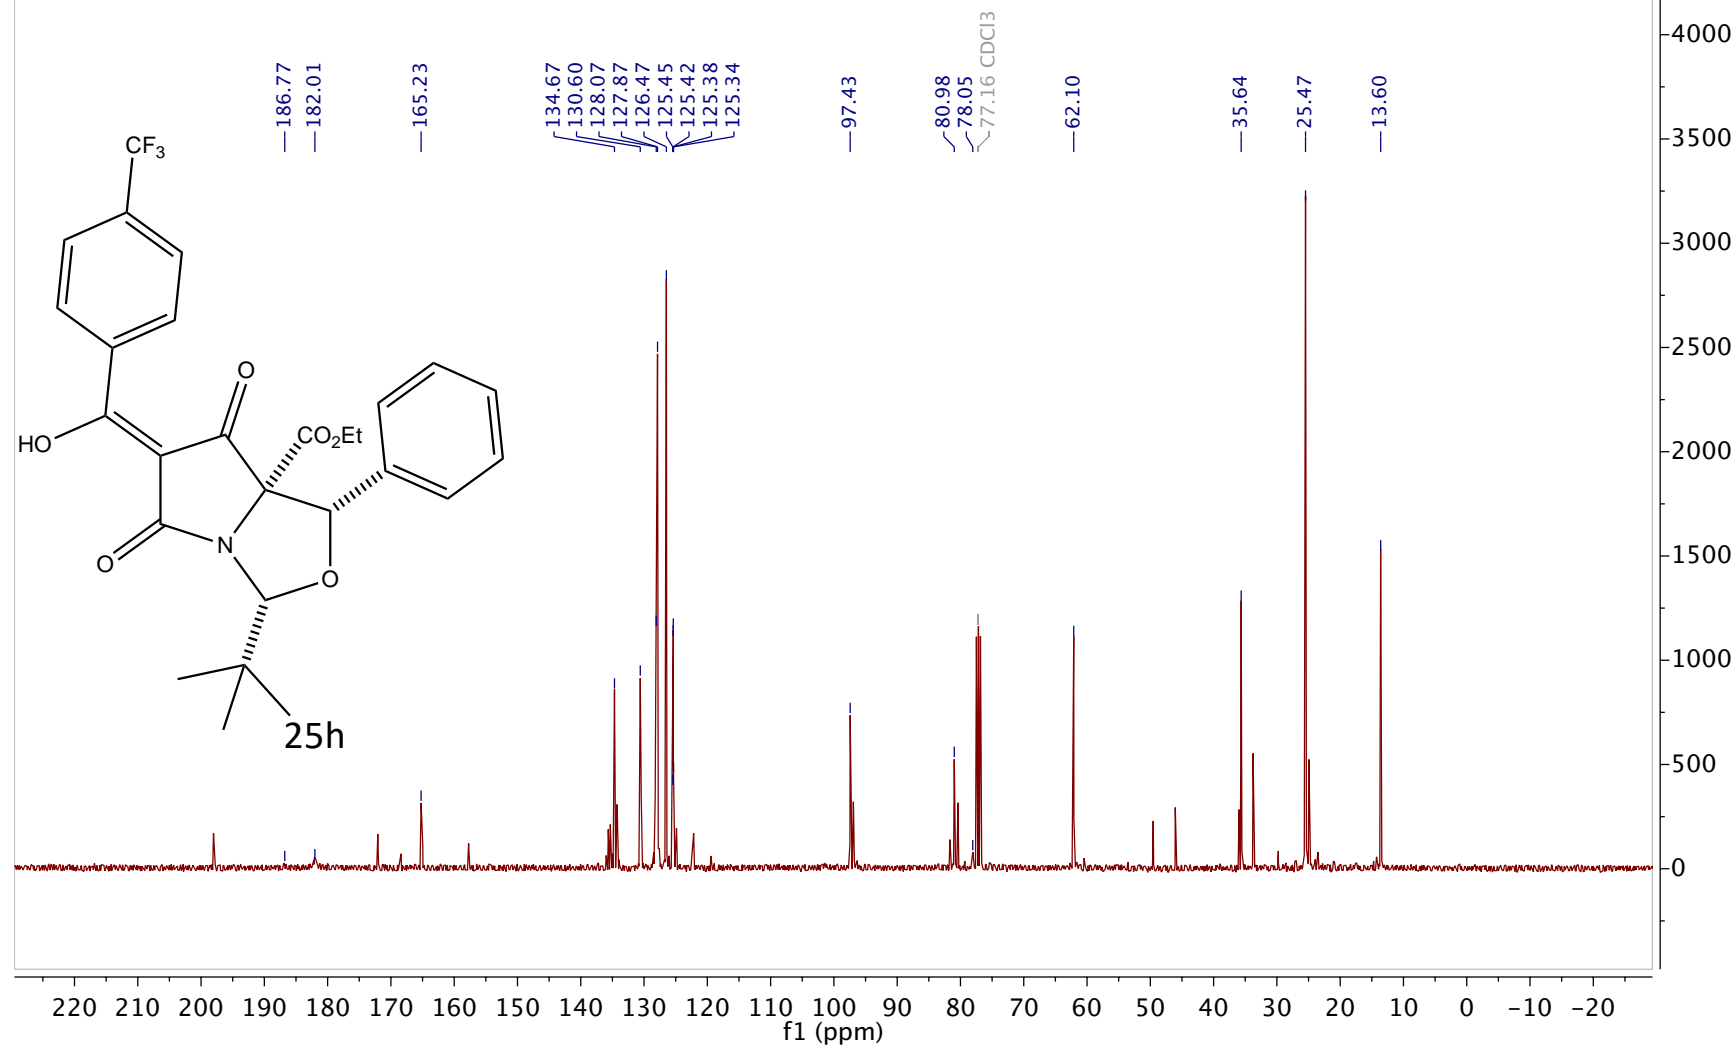

Oct09-2020-13-LS792(P) C3-H5.6.fid  
Instrument AVH400  
Group MGM  
Chemist Liban Saney  
Project Account Code DM7300  
f19dec\_256.crl CDCl3 {C:\NMR} mgmgrp 13

$^{19}\text{F}$  NMR (376 MHz,  $\text{CDCl}_3$ )

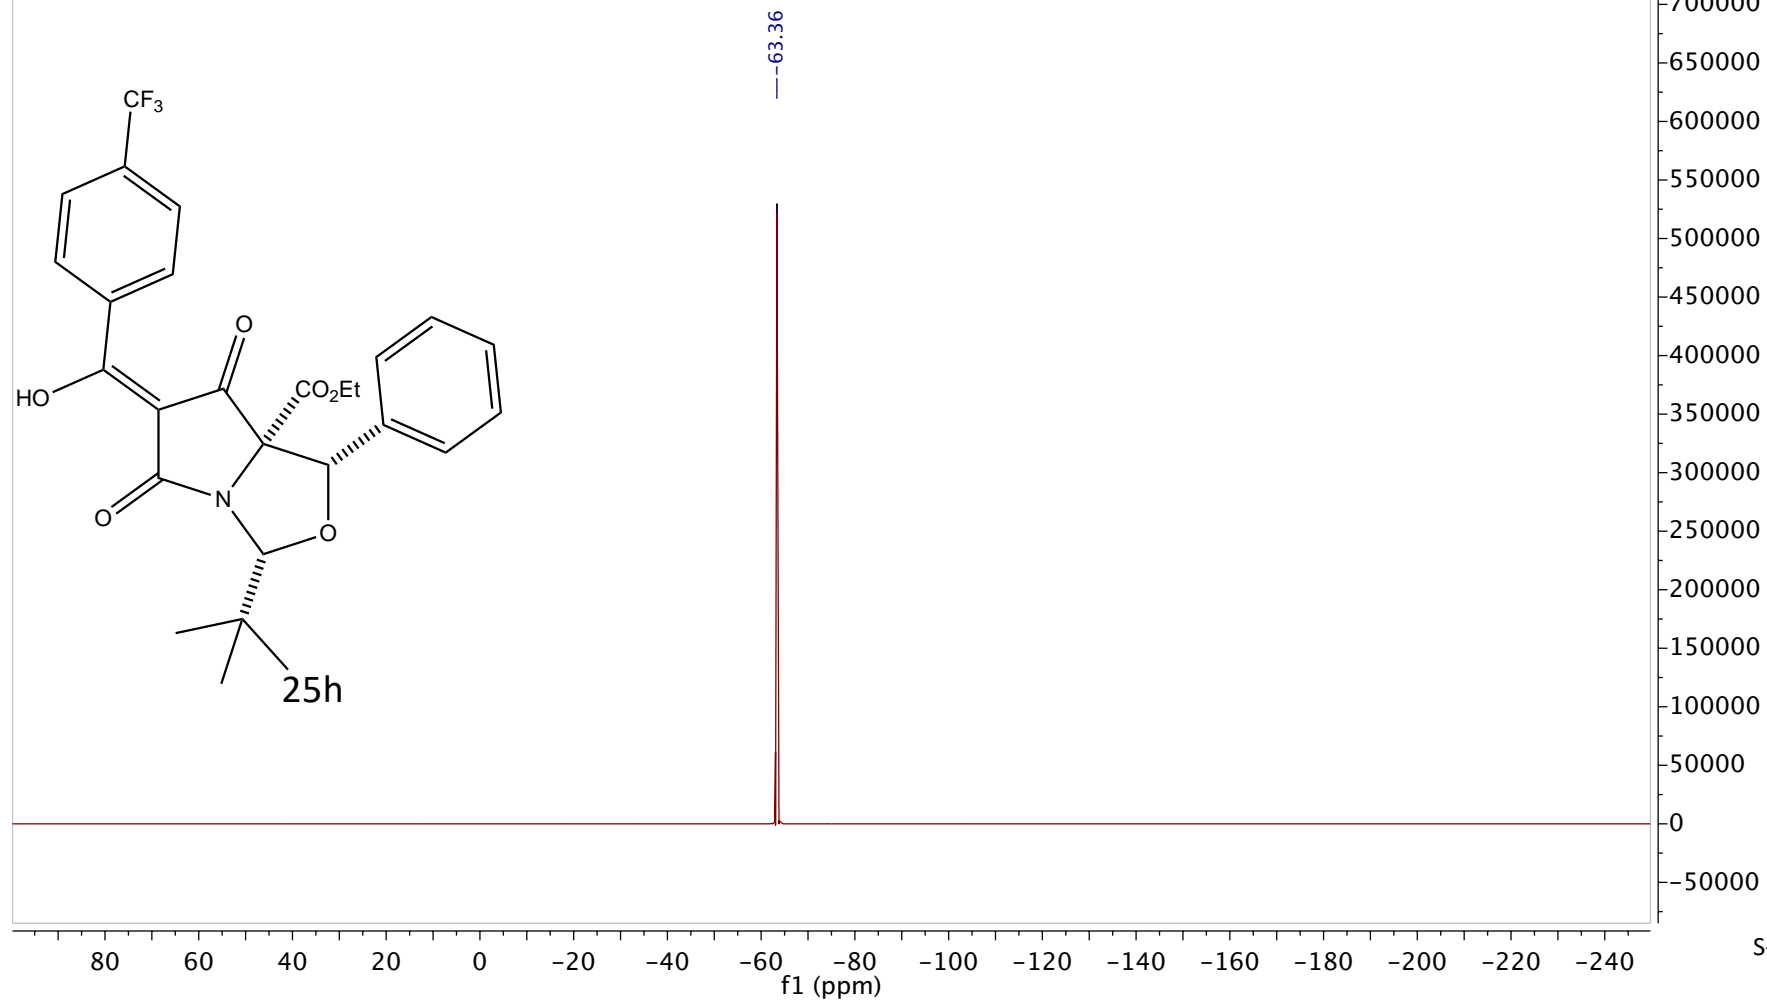

Nov24-2020-14-LS838(P) C4-D5+G1-J1.1.fid  
Instrument AVH400  
Group MGM  
Chemist Liban Saney  
Project Account Code DM7300  
h1acq.crl CDCl3 {C:\NMR} mgmgrp 14

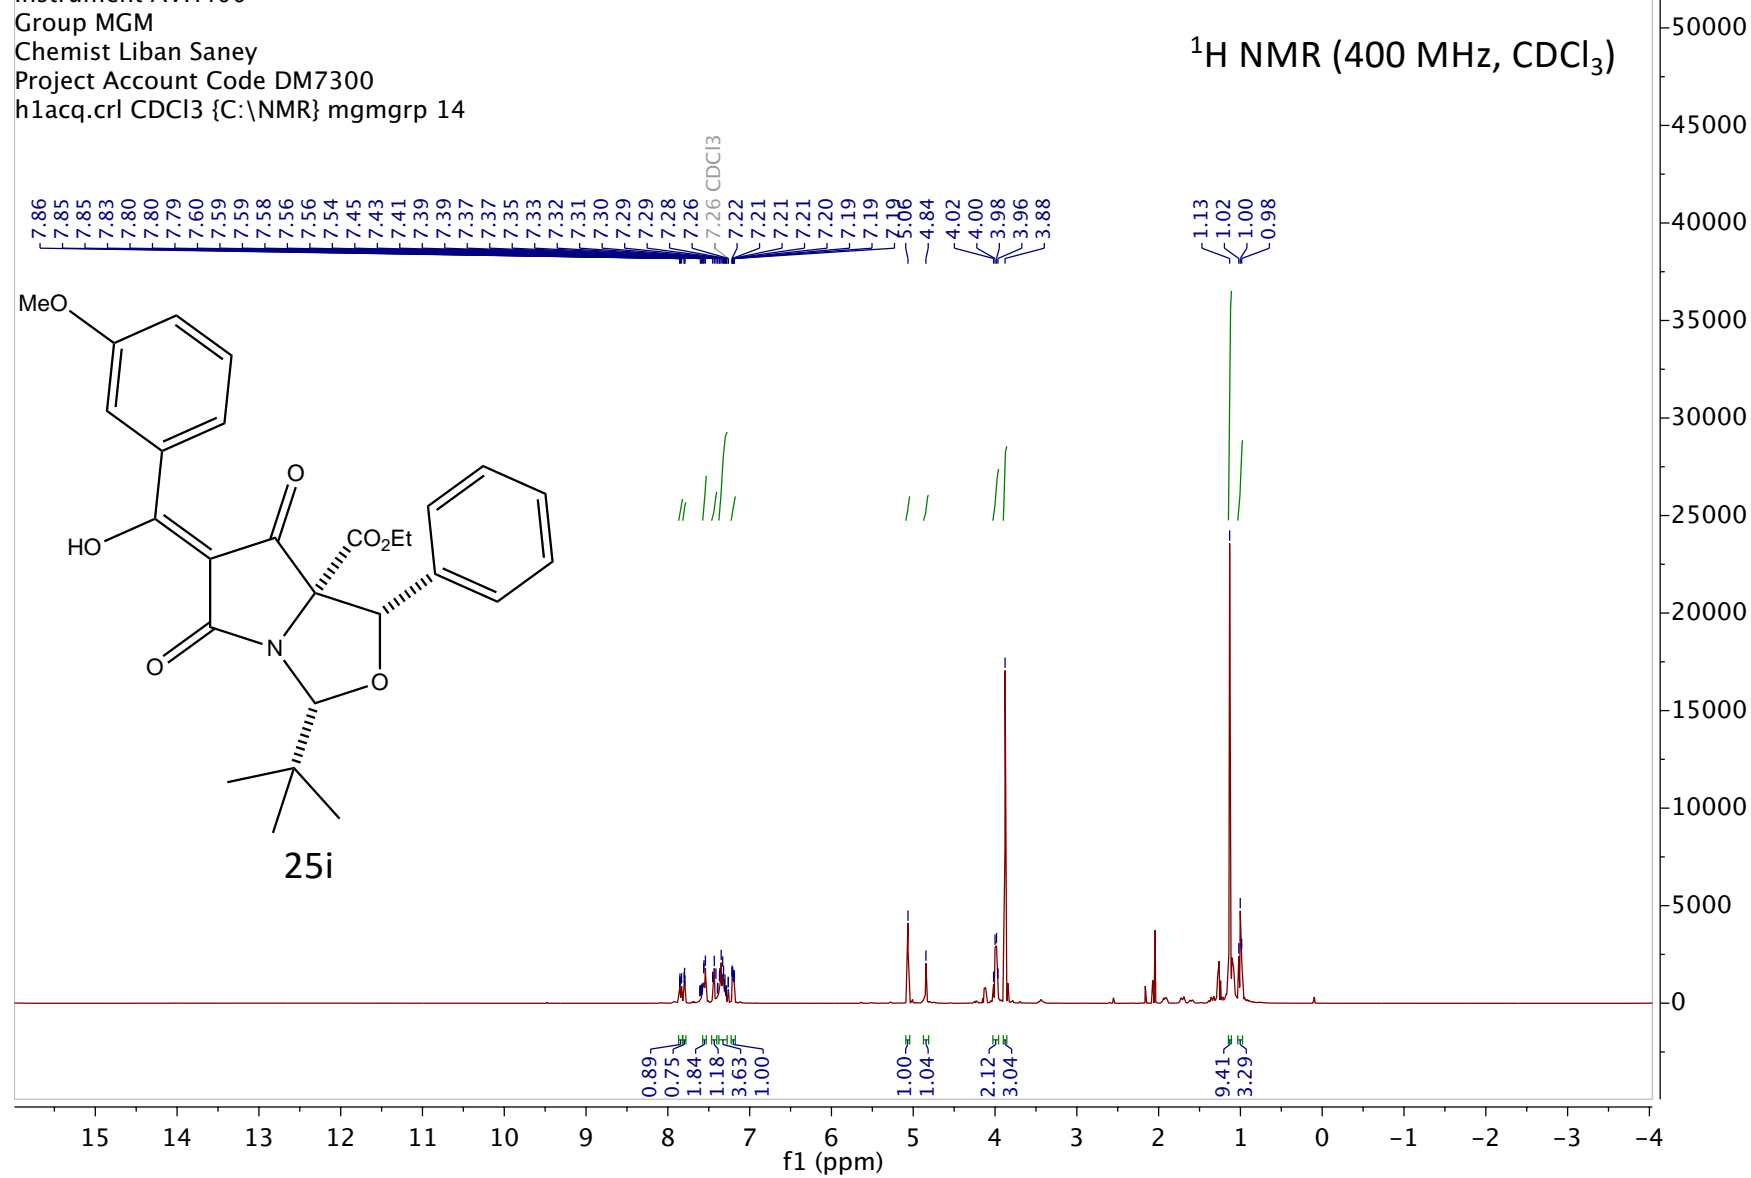

Nov24-2020-14-LS838(P) C4-D5+G1-J1.4.fid  
Instrument AVH400  
Group MGM  
Chemist Liban Saney  
Project Account Code DM7300  
c13acq\_512.crl CDCl3 {C:\NMR} mgmgrp 14

<sup>13</sup>C NMR (101 MHz, CDCl<sub>3</sub>)

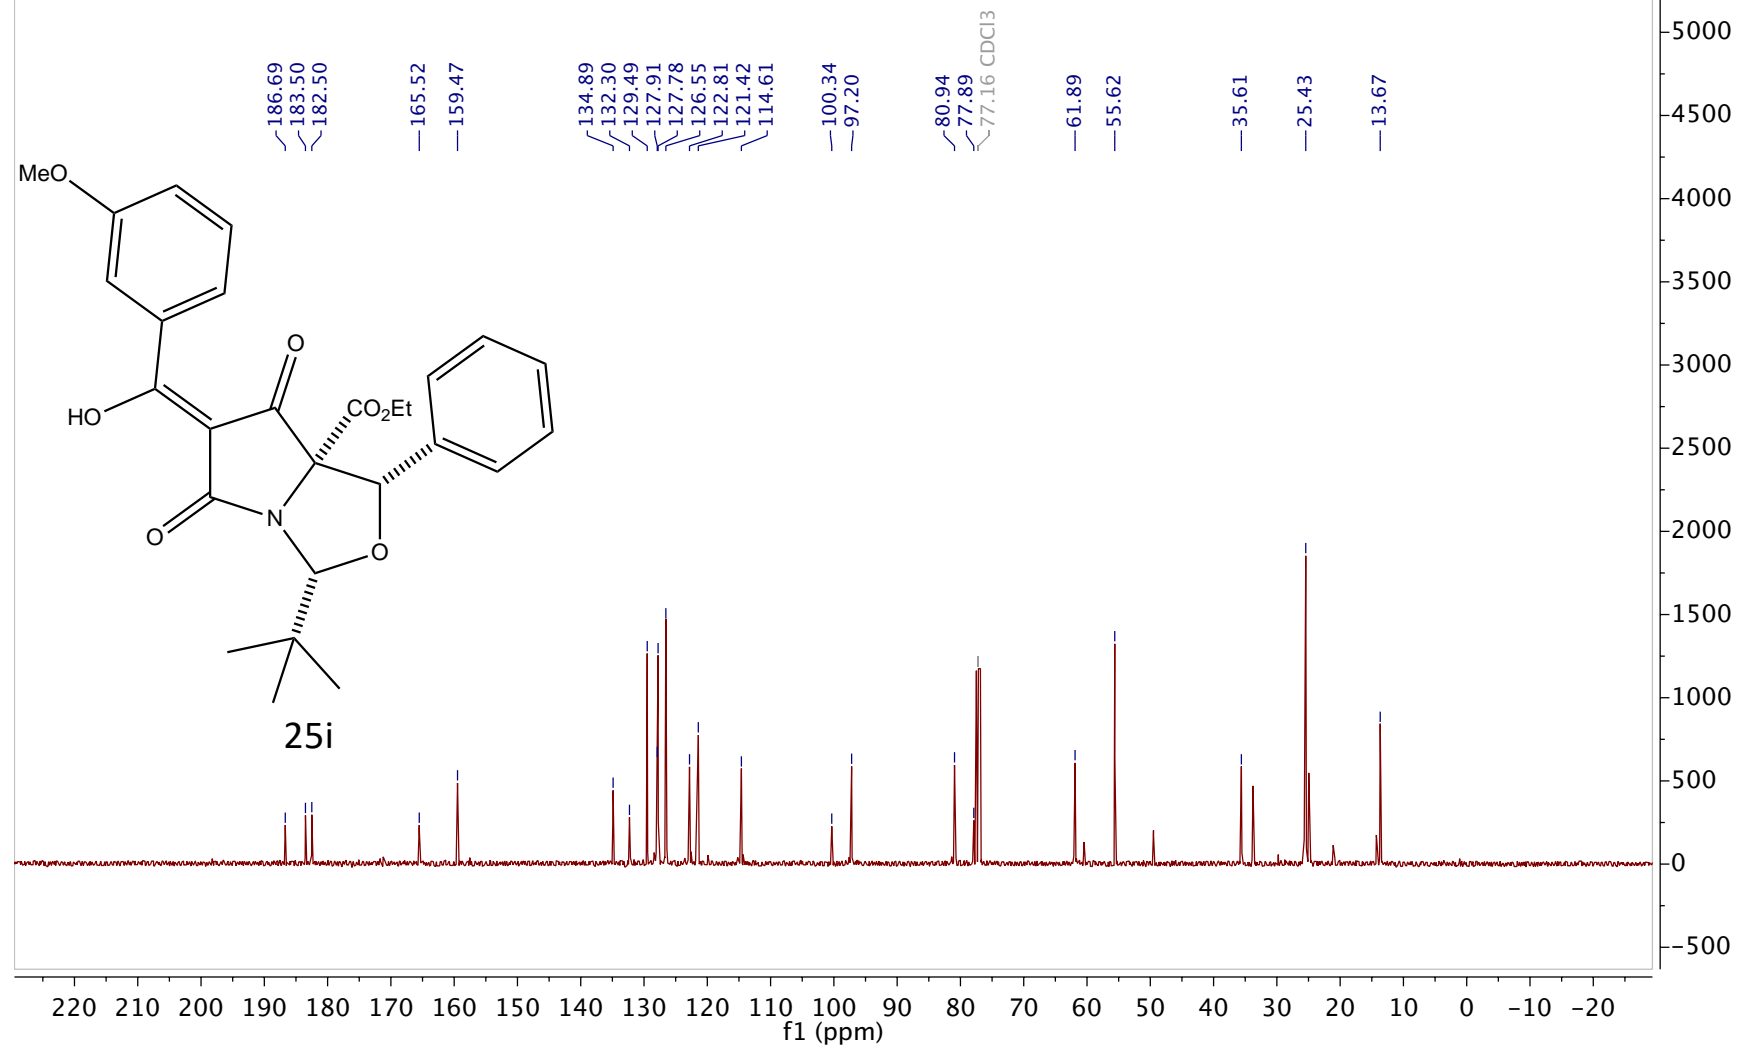

Dec15-2020-13-LS855(P) E2-G1.1.fid  
Instrument AVH400  
Group MGM  
Chemist Liban Saney  
Project Account Code DM7300  
h1acq.crl CDCl3 {C:\NMR} mgmgrp 13

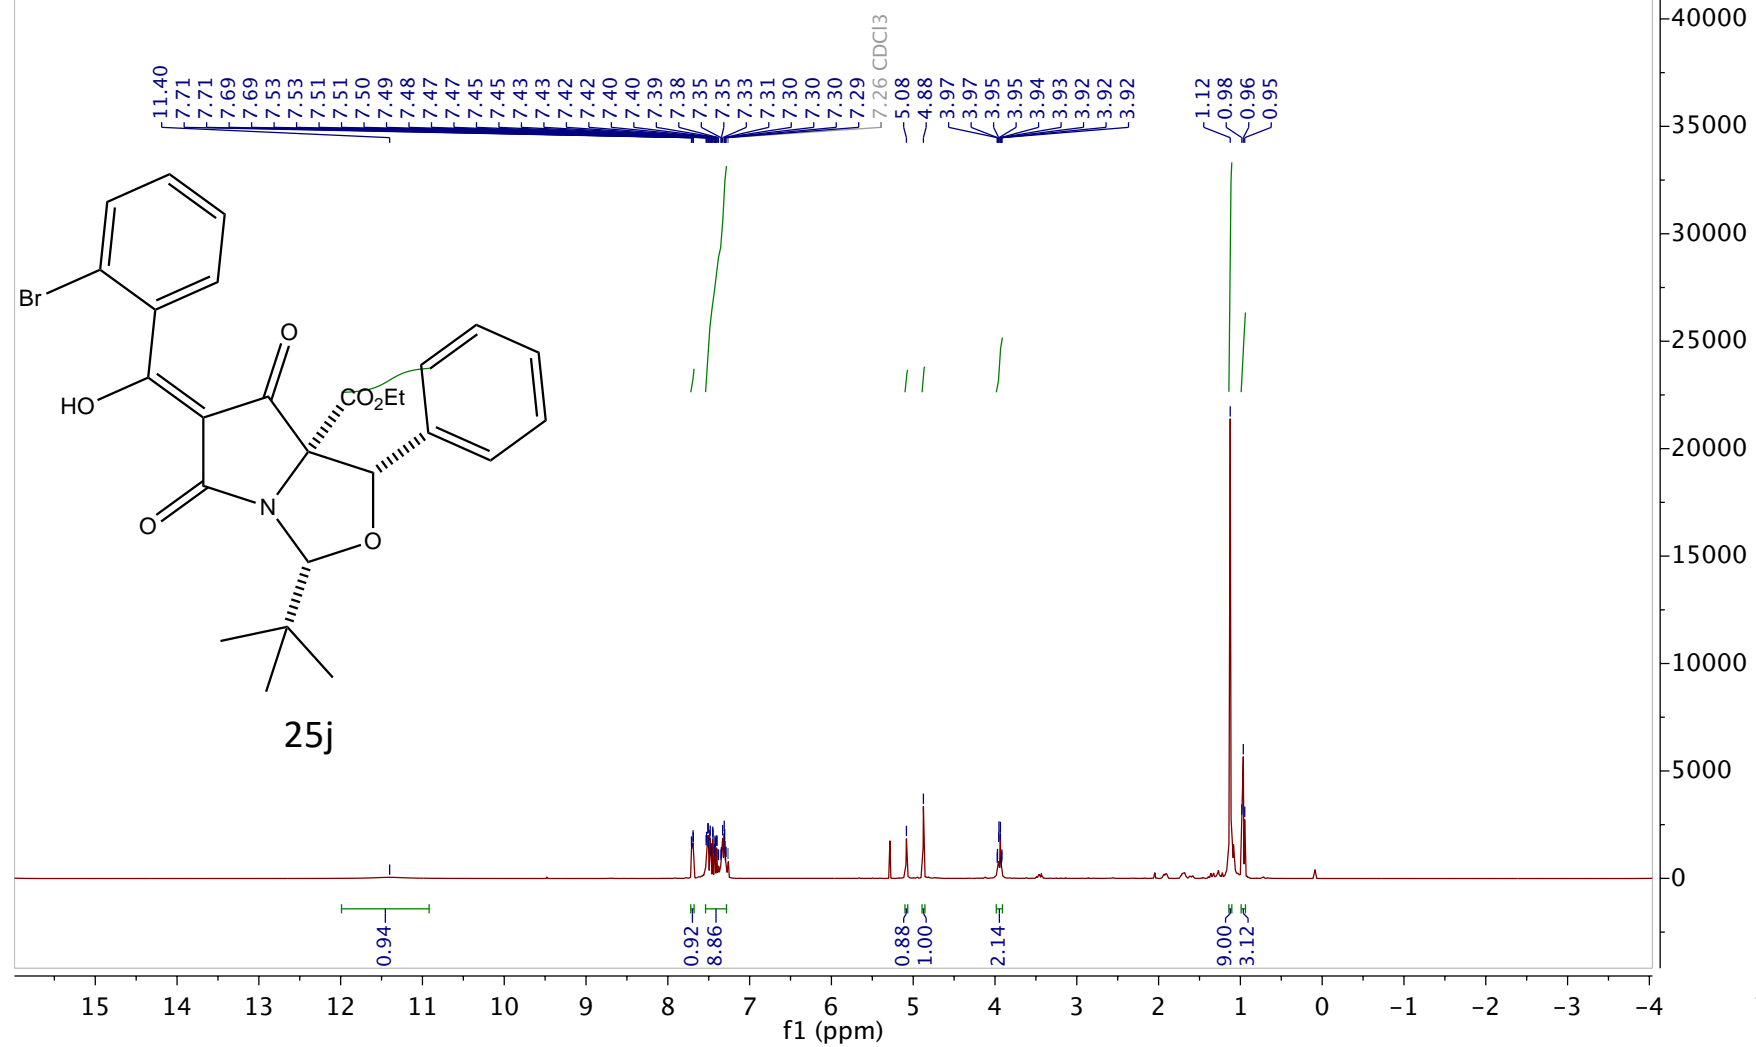

Dec15-2020-13-LS855(P) E2-G1.4.fid  
Instrument AVH400  
Group MGM  
Chemist Liban Saney  
Project Account Code DM7300  
c13acq\_512.crl CDCl3 {C:\NMR} mgmgrp 13

<sup>13</sup>C NMR (101 MHz, CDCl<sub>3</sub>)

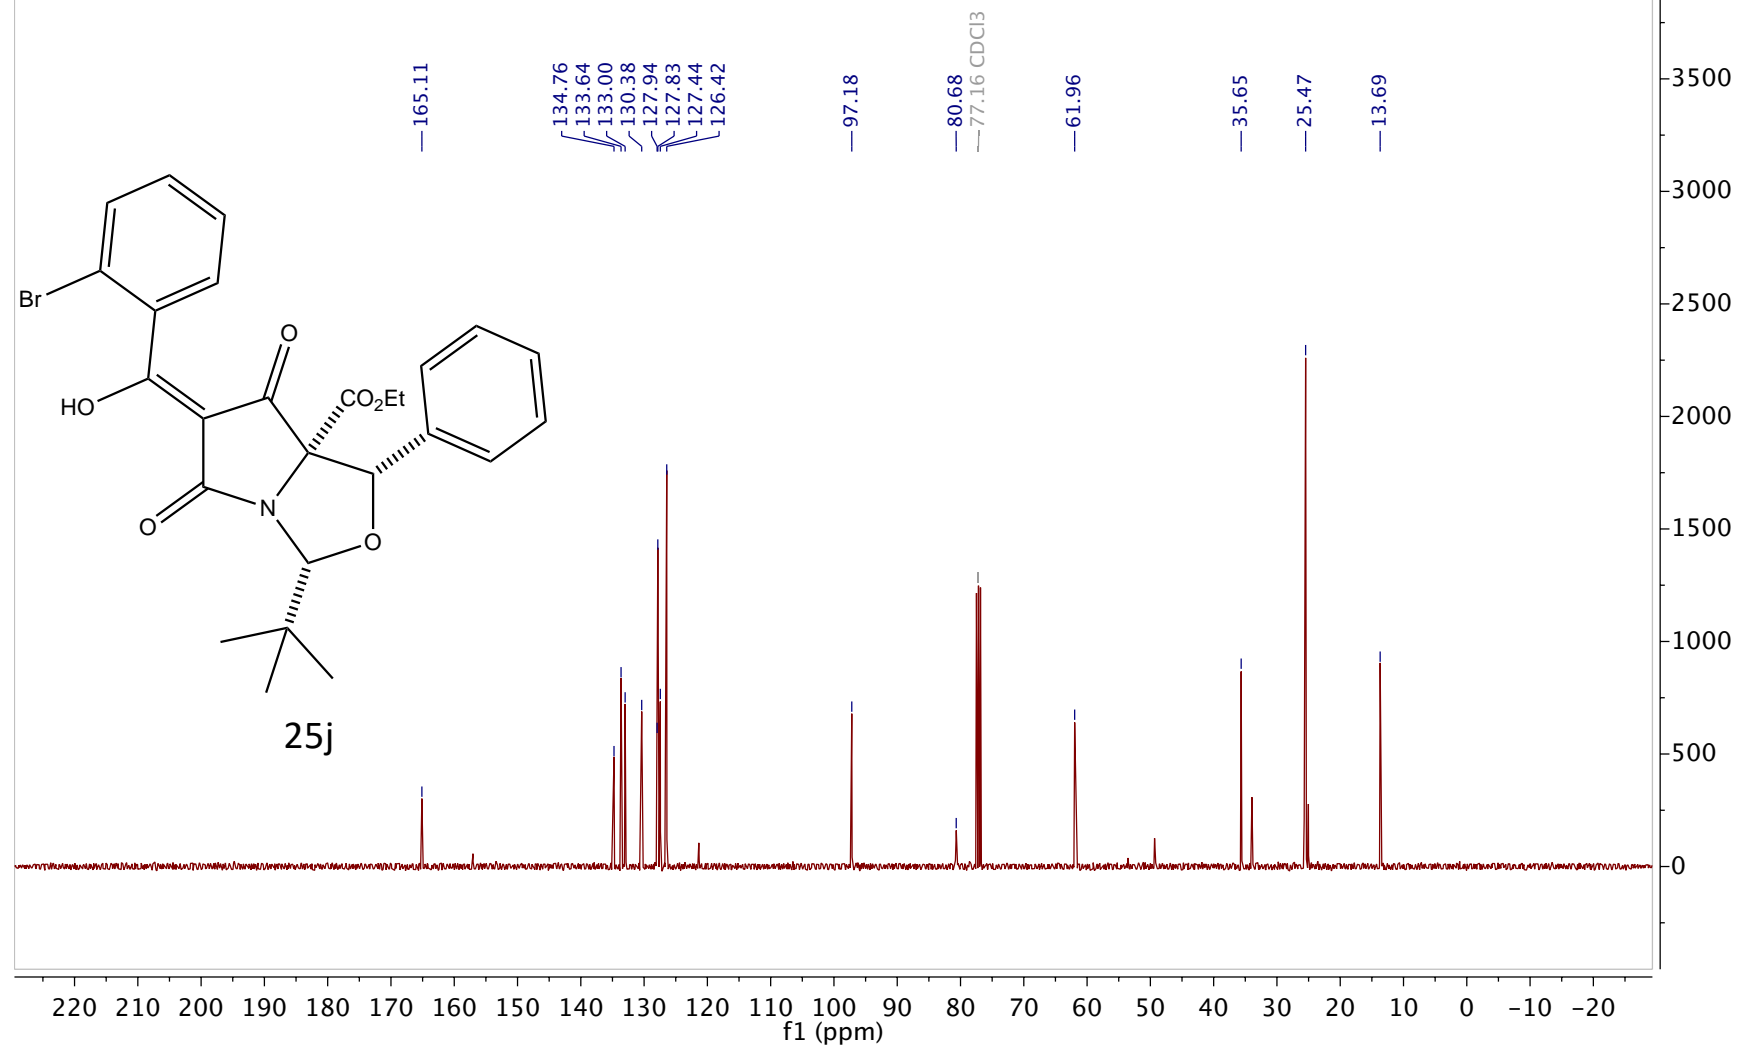



Nov26-2020-13-LS861(P) C3-G3.1.fid  
Instrument AVH400  
Group MGM  
Chemist Liban Saney  
Project Account Code DM7300  
h1acq.crl CDCl3 {C:\NMR} mgmgrp 13

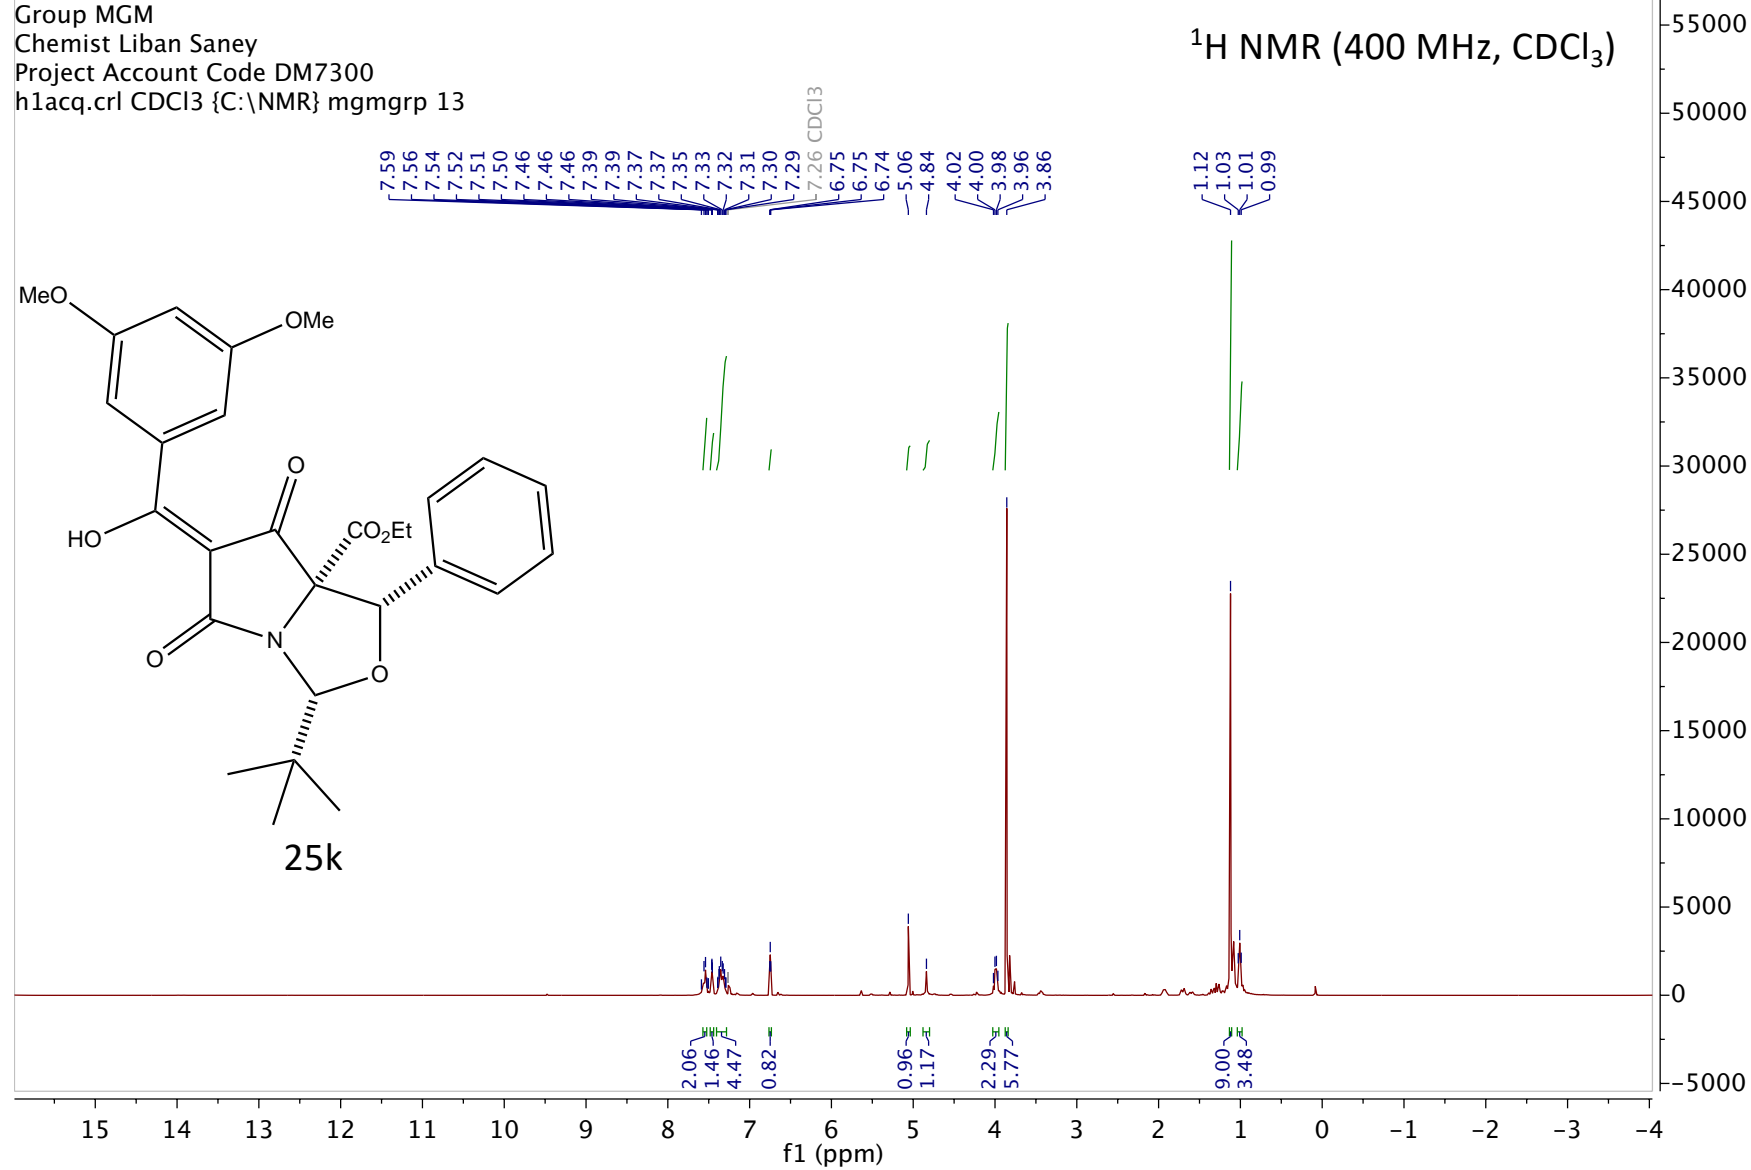

Nov26-2020-13-LS861(P) C3-G3.4.fid  
Instrument AVH400  
Group MGM  
Chemist Liban Saney  
Project Account Code DM7300  
c13acq\_512.crl CDCl3 {C:\NMR} mgmgrp 13

<sup>13</sup>C NMR (101 MHz, CDCl<sub>3</sub>)

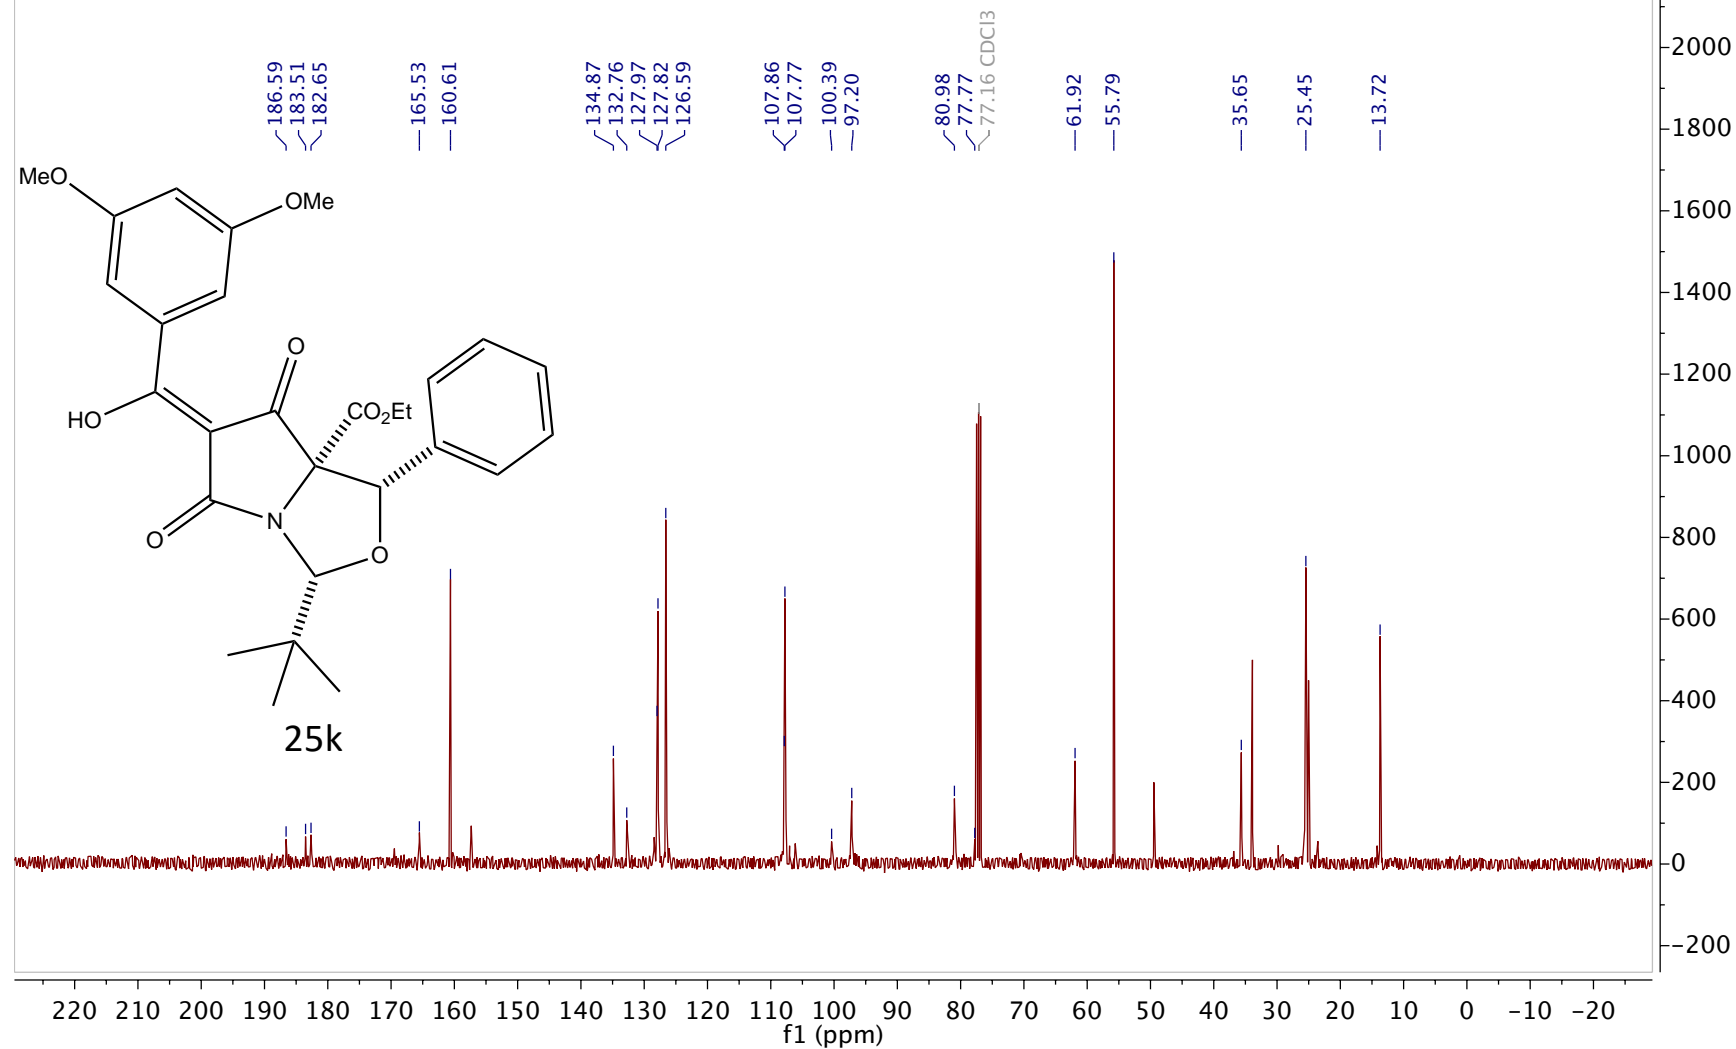

Dec20-2020-3-LS882(P) C4-E1.1.fid  
Instrument AVH400  
Group MGM  
Chemist Liban Saney  
Project Account Code DM7300  
h1acq.crl CDCl3 {C:\NMR} mgmgrp 3

<sup>1</sup>H NMR (400 MHz, CDCl<sub>3</sub>)

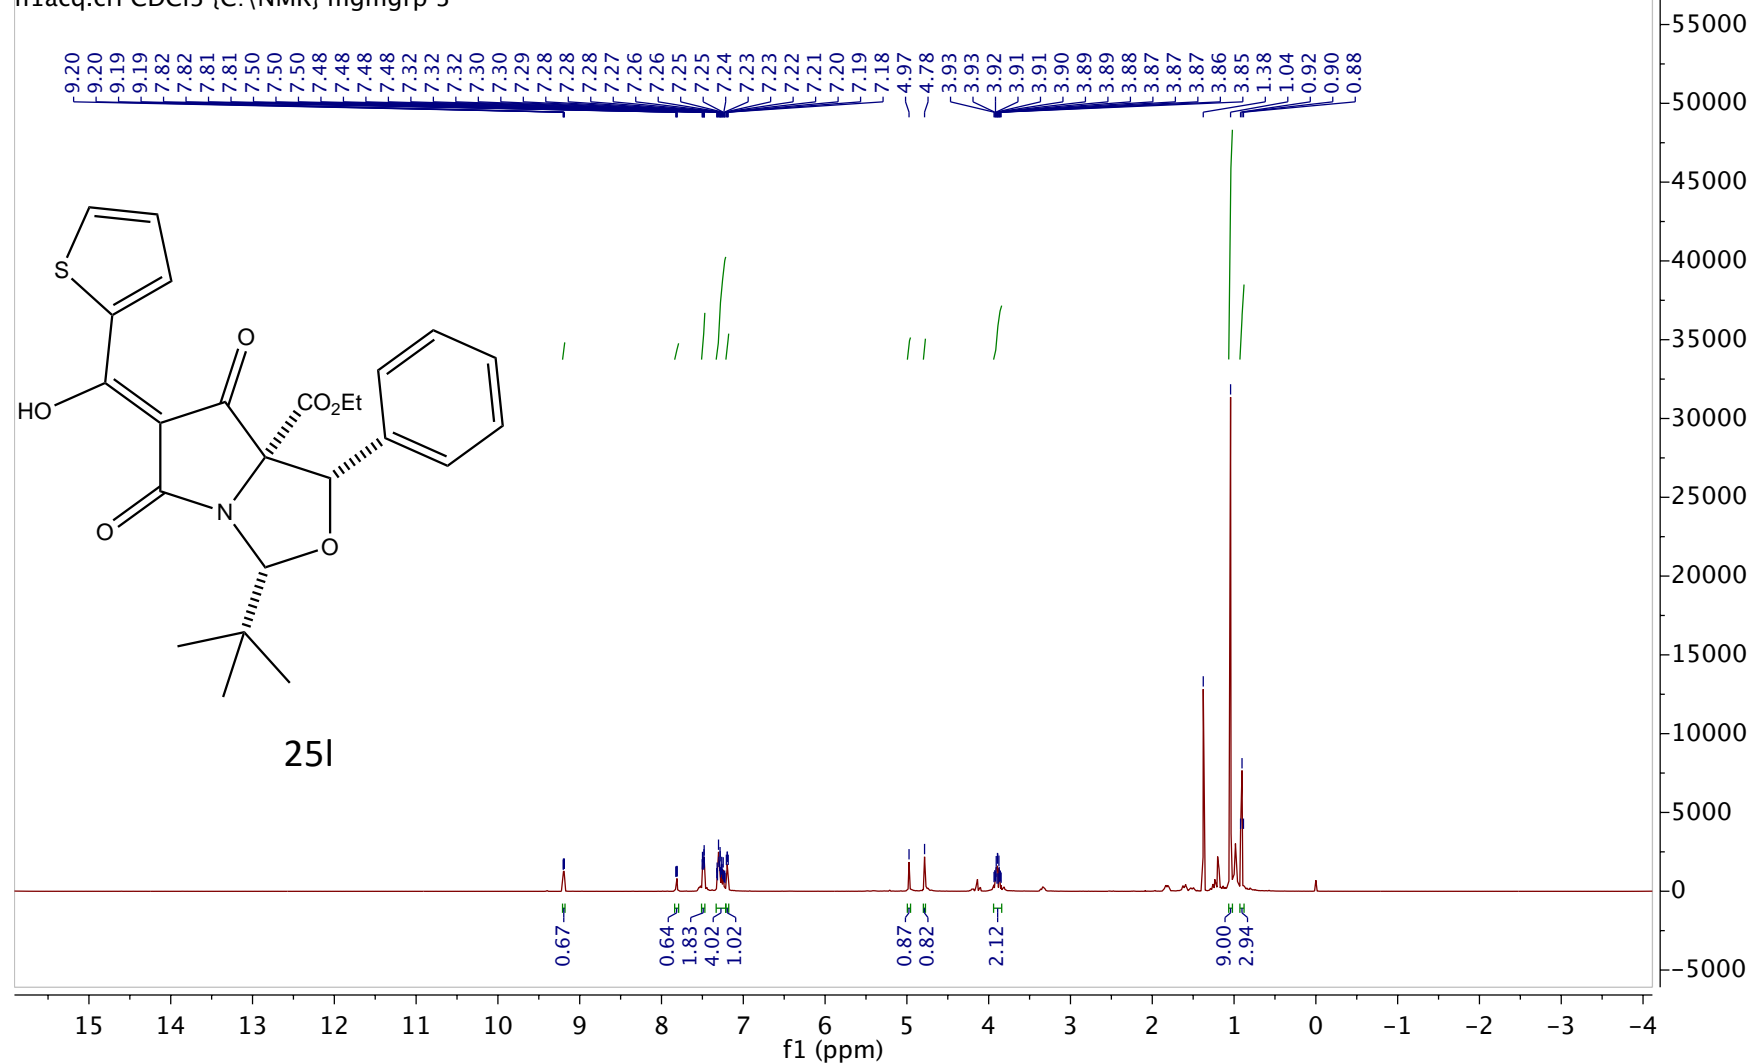

Dec20-2020-3-LS882(P) C4-E1.4.fid  
Instrument AVH400  
Group MGM  
Chemist Liban Saney  
Project Account Code DM7300  
c13acq\_512.crl CDCl3 {C:\NMR} mgmgrp 3

<sup>13</sup>C NMR (101 MHz, CDCl<sub>3</sub>)

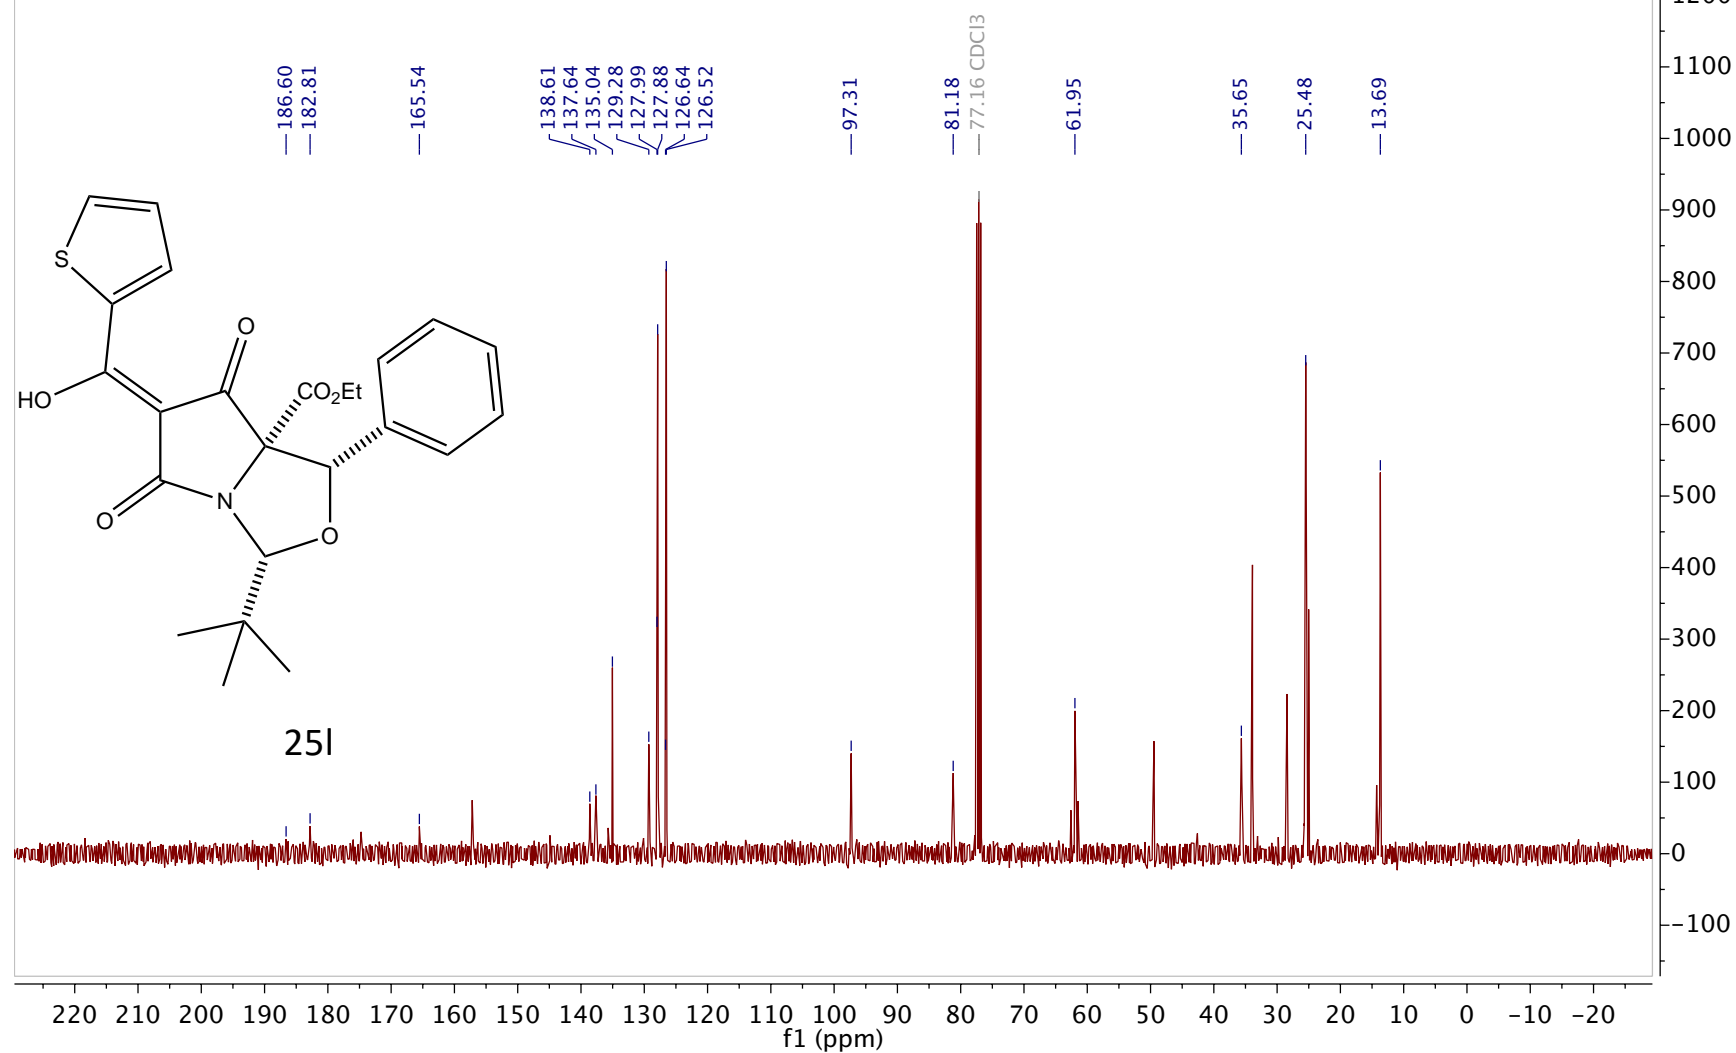

Nov05-2020-51-LS831(P) C1-F8.1.fid  
Instrument AVH400  
Group MGM  
Chemist Liban Saney  
Project Account Code DM7300  
h1acq.crl CDCl3 {C:\NMR} mgmgrp 51

<sup>1</sup>H NMR (400 MHz, CDCl<sub>3</sub>)

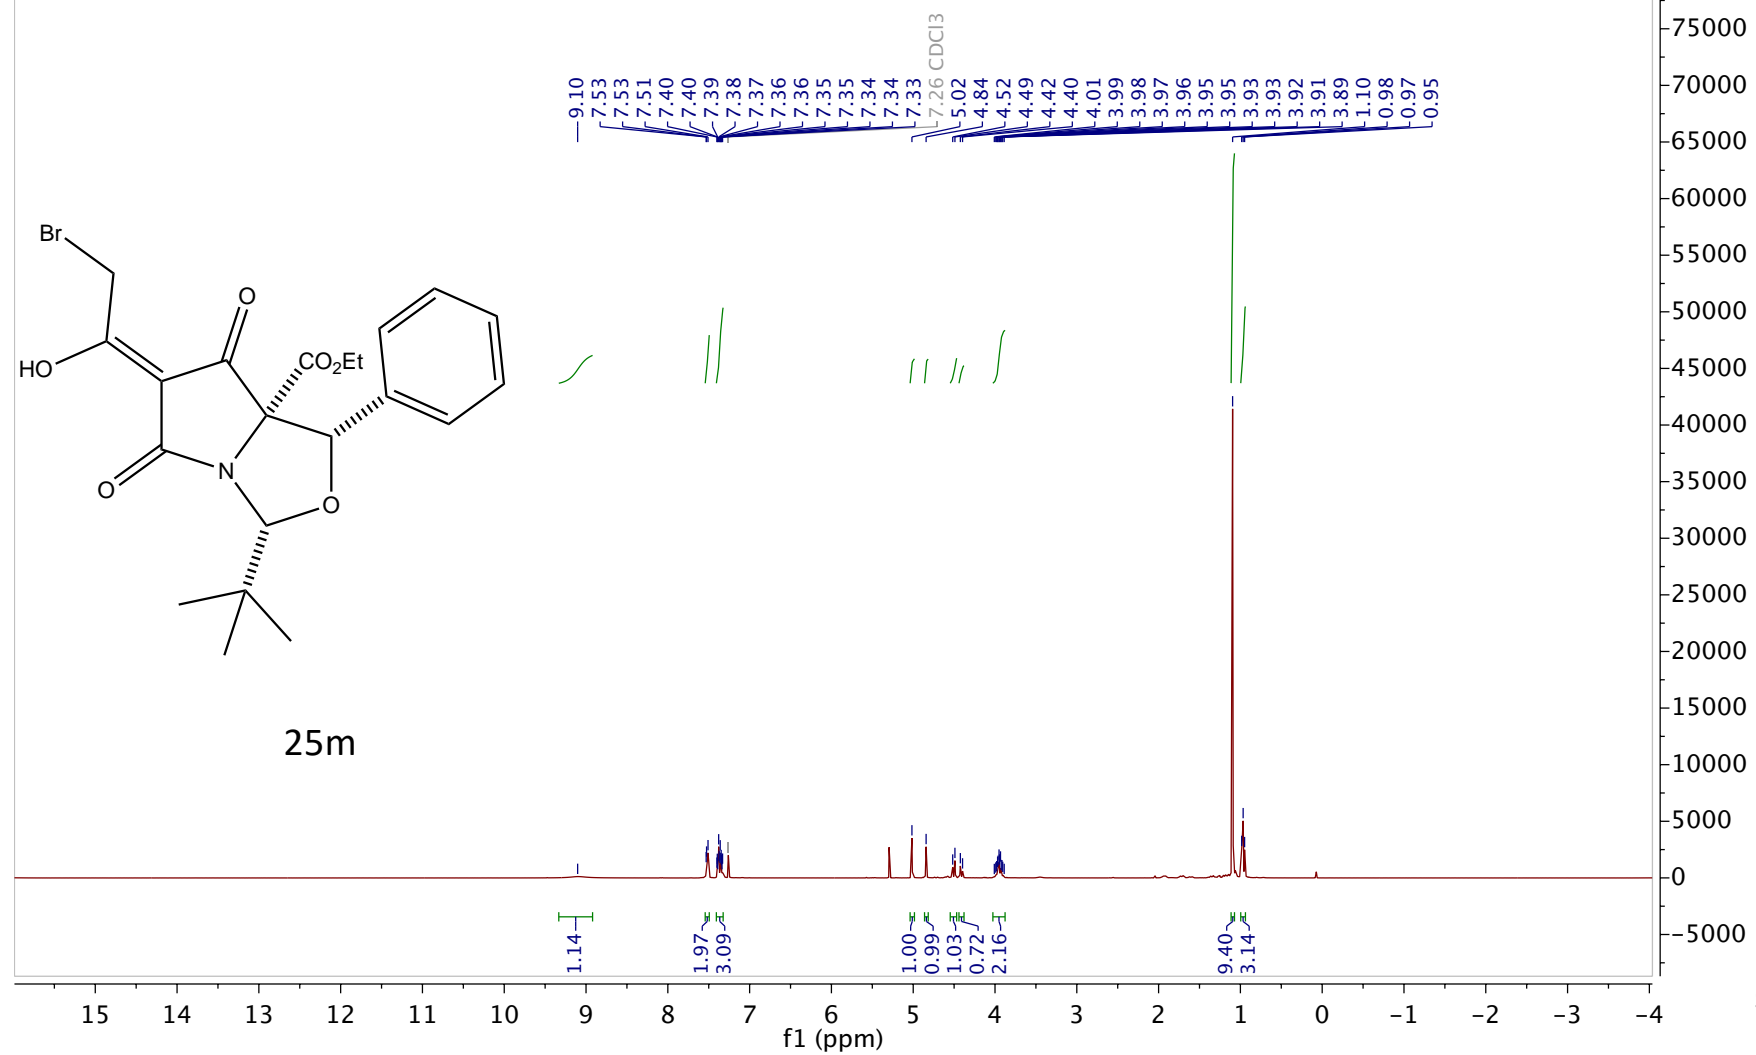

Nov05-2020-51-LS831(P) C1-F8.4.fid  
Instrument AVH400  
Group MGM  
Chemist Liban Saney  
Project Account Code DM7300  
c13acq\_512.crl CDCl3 {C:\NMR} mgmgrp 51

<sup>13</sup>C NMR (101 MHz, CDCl<sub>3</sub>)

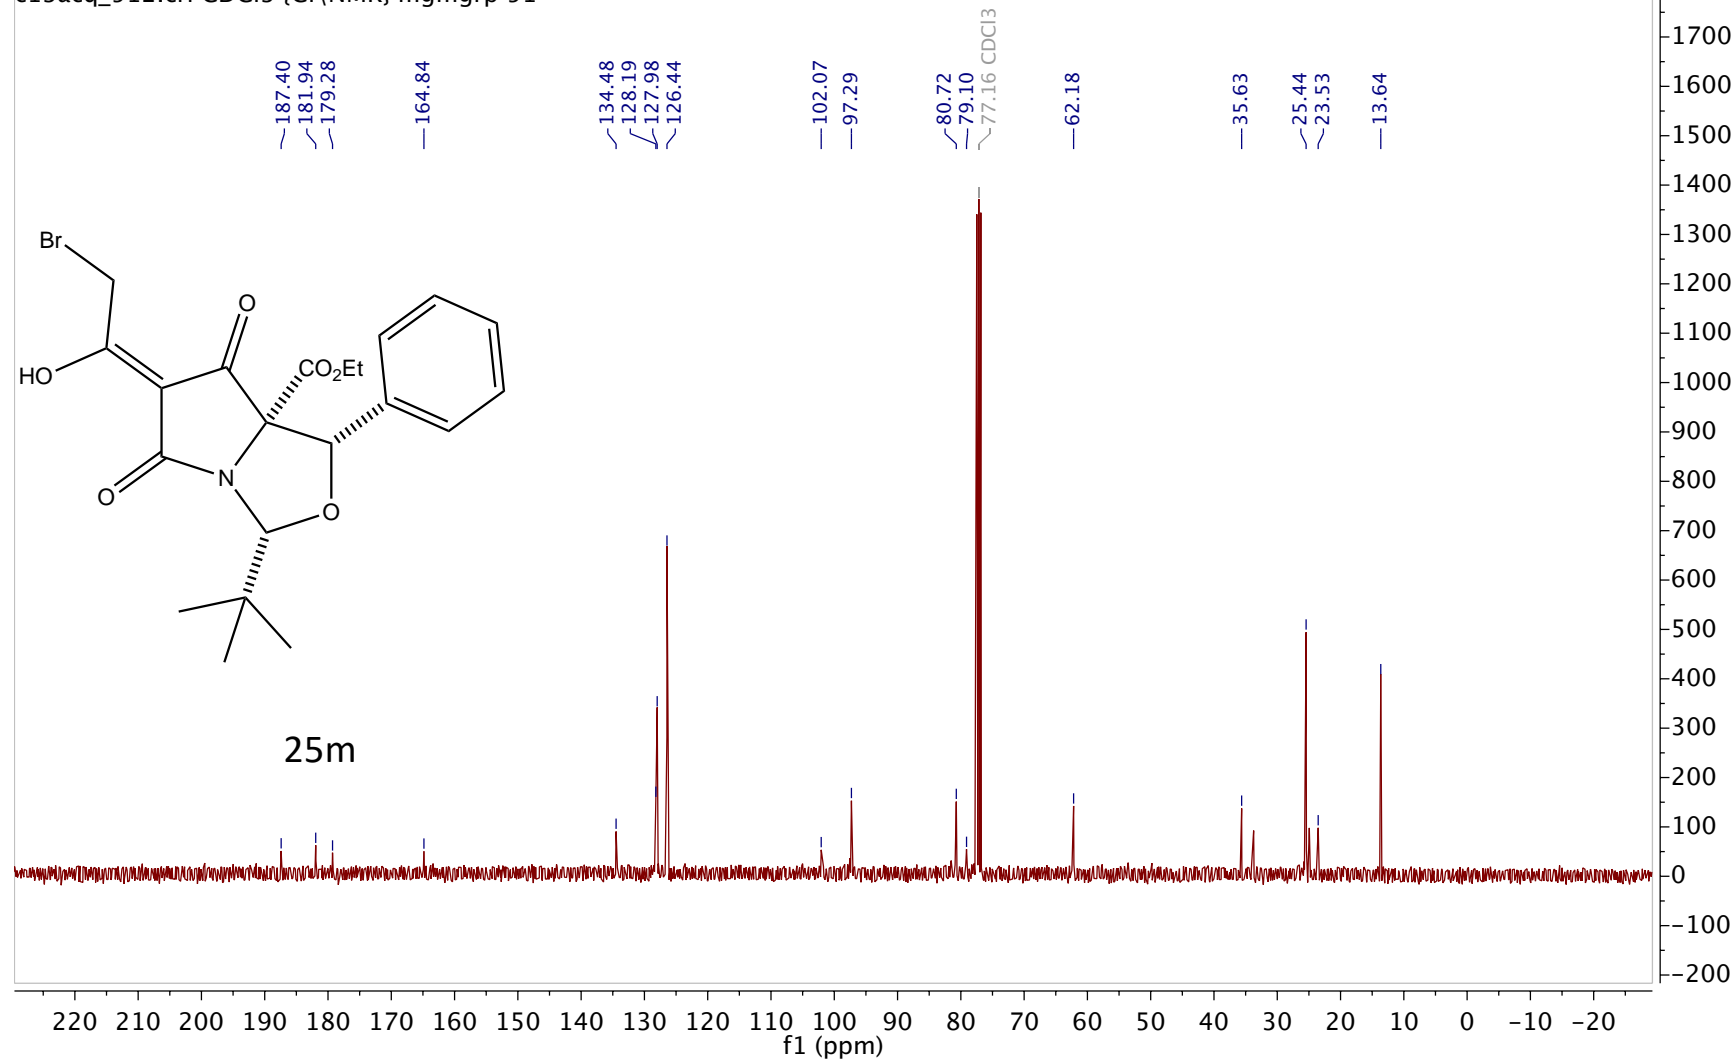

Dec22-2020-4-LS889(P) C3-I1.1.fid  
Instrument AVG400  
Group MGM  
Chemist Liban Saney  
Project Account Code DM7300  
h1acq.crl CDCl3 {C:\NMR} mgmgrp 4

<sup>1</sup>H NMR (400 MHz, CDCl<sub>3</sub>)

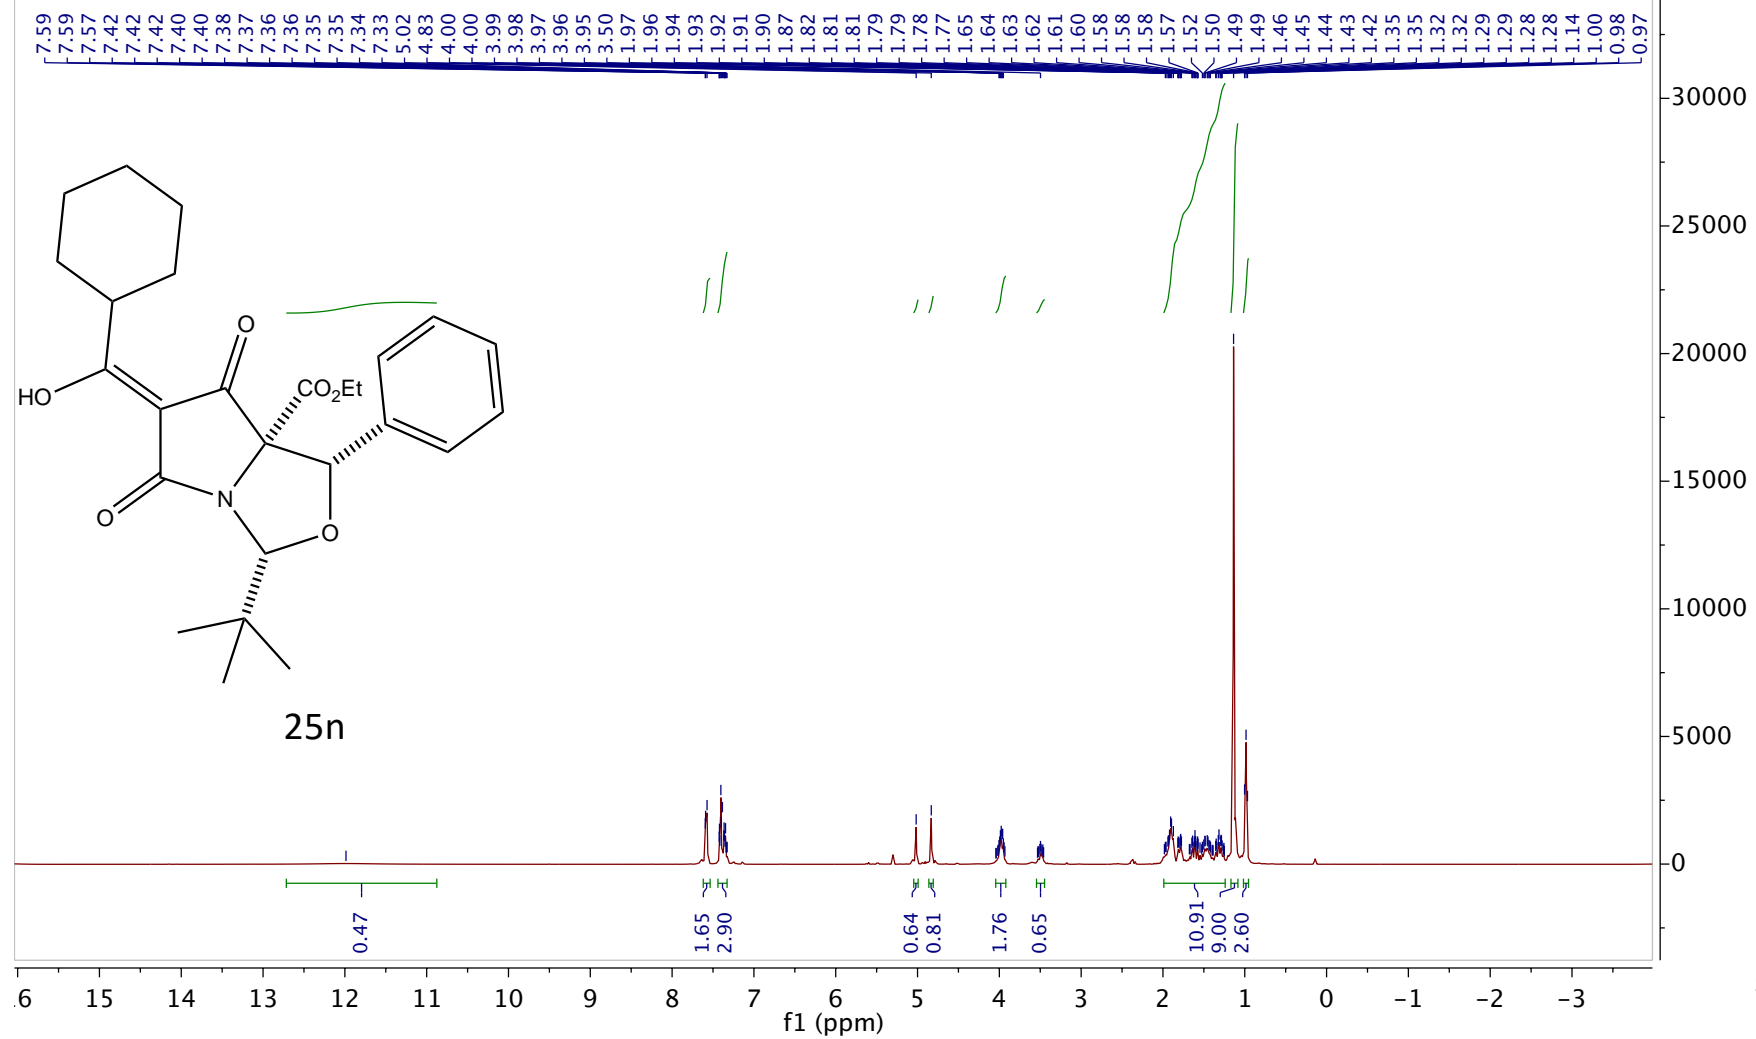

Dec22-2020-4-LS889(P) C3-11.5.fid  
Instrument AVG400  
Group MGM  
Chemist Liban Saney  
Project Account Code DM7300  
c13acq\_512.crl CDCl3 {C:\NMR} mgmgrp 4

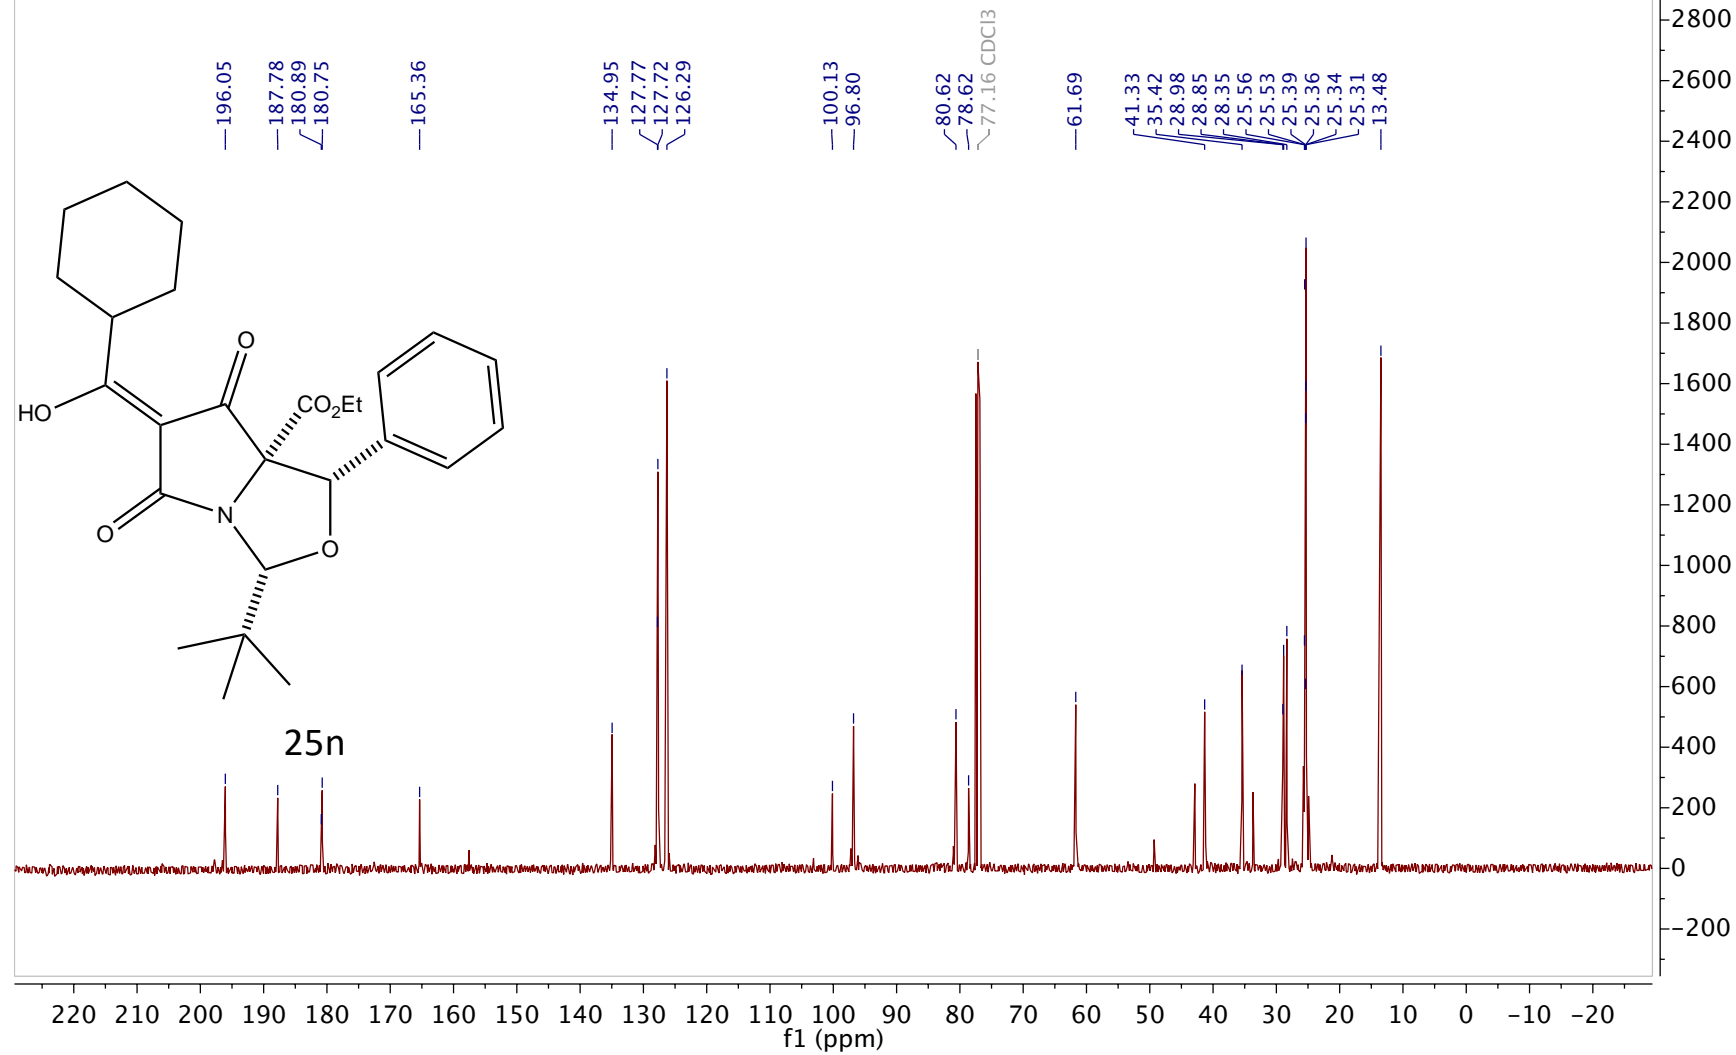



Jan05-2021-12-LS896(P) E2-H5.1.fid  
Instrument AVH400  
Group MGM  
Chemist Liban Saney  
Project Account Code DM7300  
h1acq.crl CDCl3 {C:\NMR} mgmgrp 12

<sup>1</sup>H NMR (400 MHz, CDCl<sub>3</sub>)

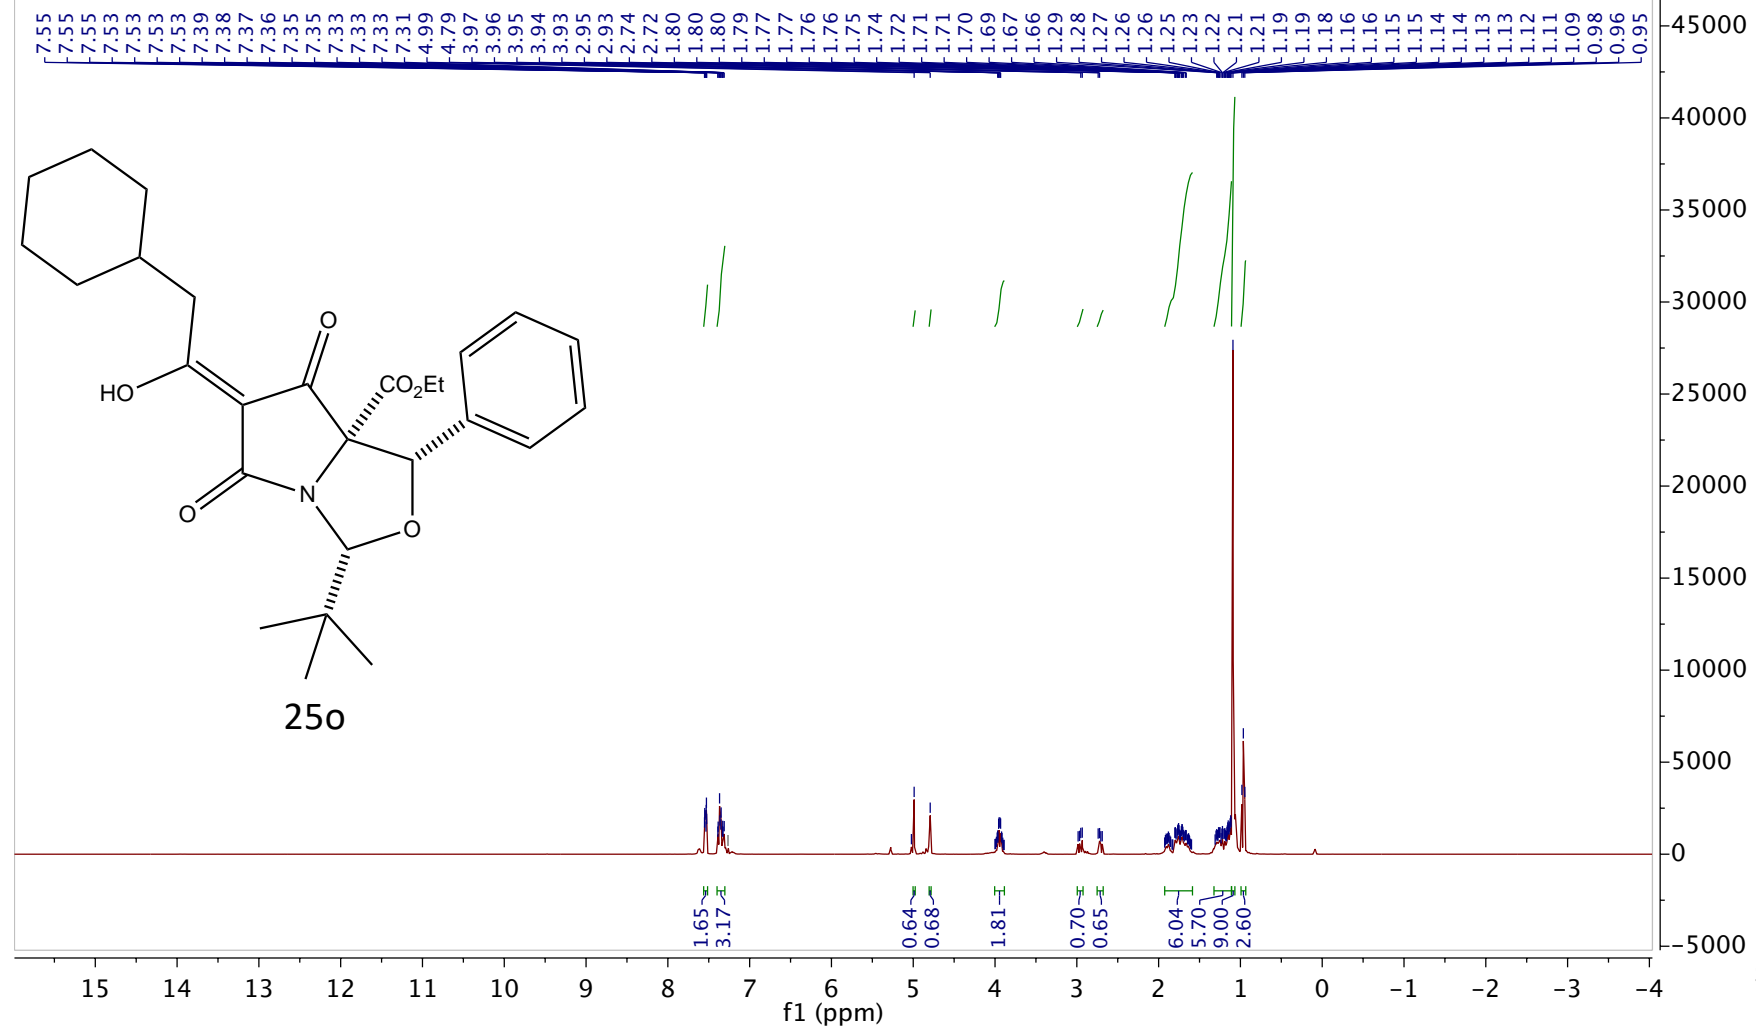

Jan05-2021-12-LS896(P) E2-H5.4.fid  
Instrument AVH400  
Group MGM  
Chemist Liban Saney  
Project Account Code DM7300  
c13acq\_512.crl CDCl3 {C:\NMR} mgmgrp 12

<sup>13</sup>C NMR (101 MHz, CDCl<sub>3</sub>)

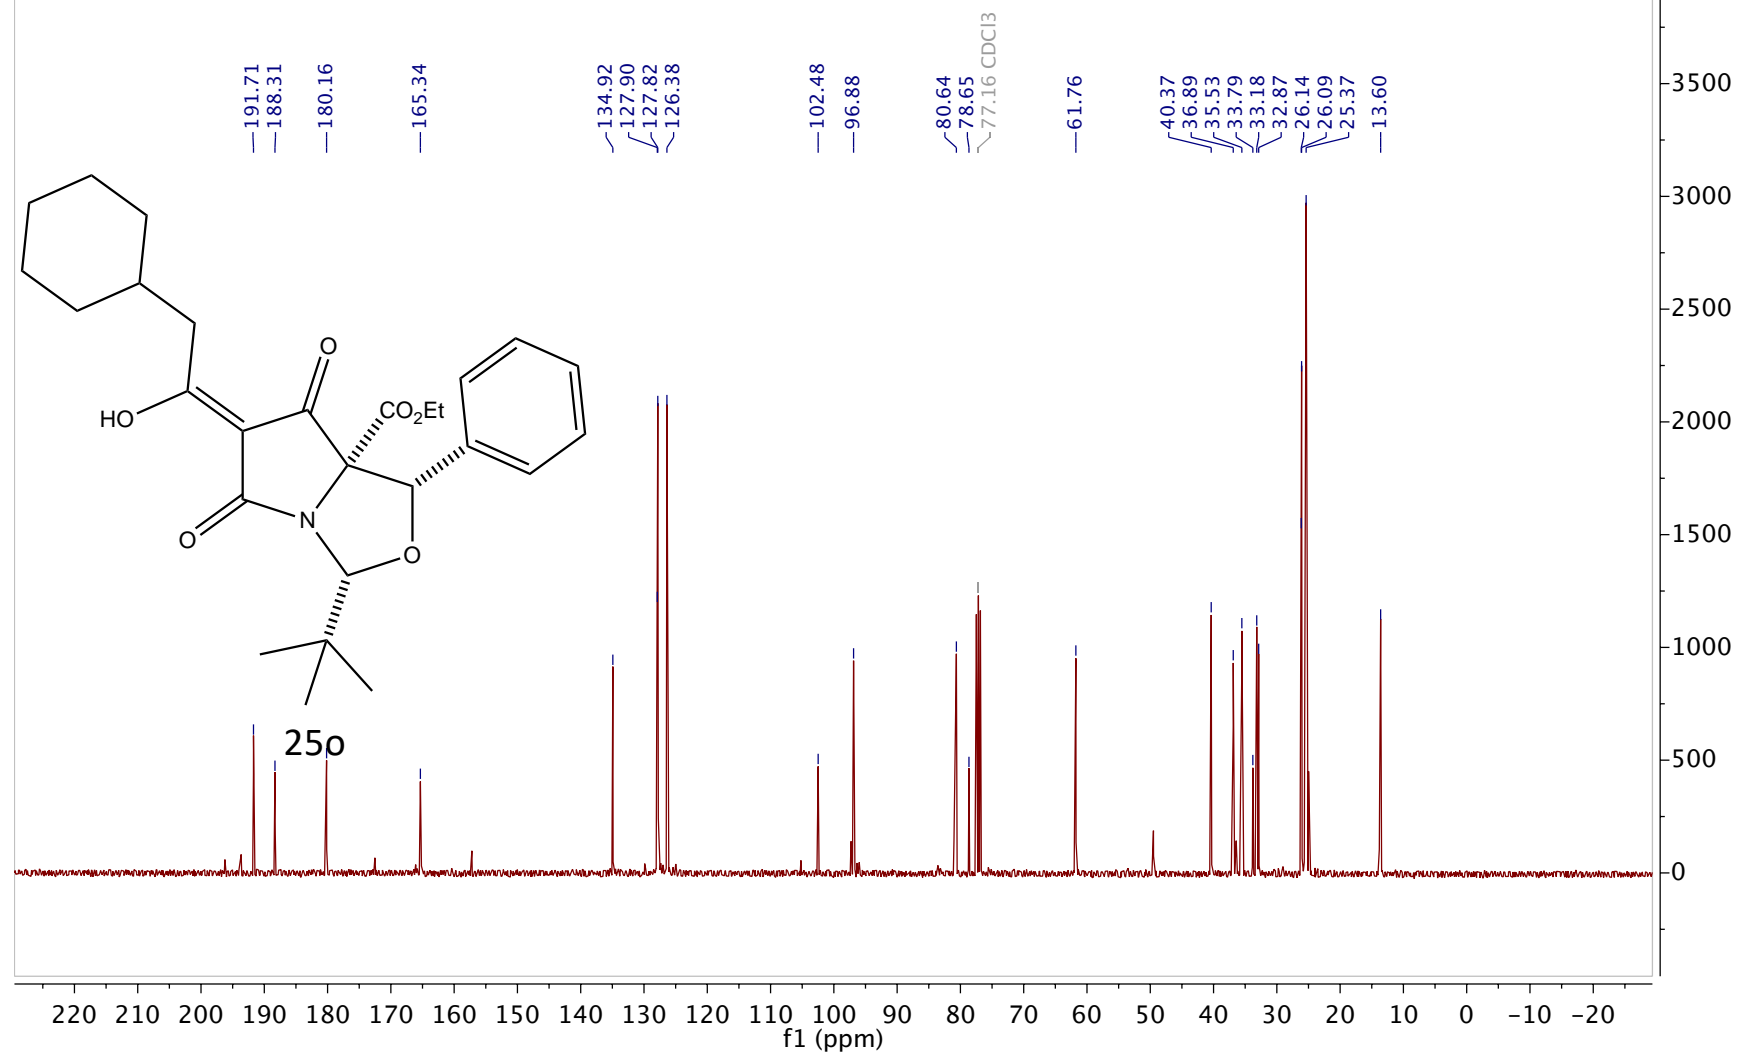

Dec22-2020-4-LS890(P) B6-H6.1.fid  
Instrument AVG400  
Group MGM  
Chemist Liban Saney  
Project Account Code DM7300  
h1acq.crl CDCl3 {C:\NMR} mgmgrp 4

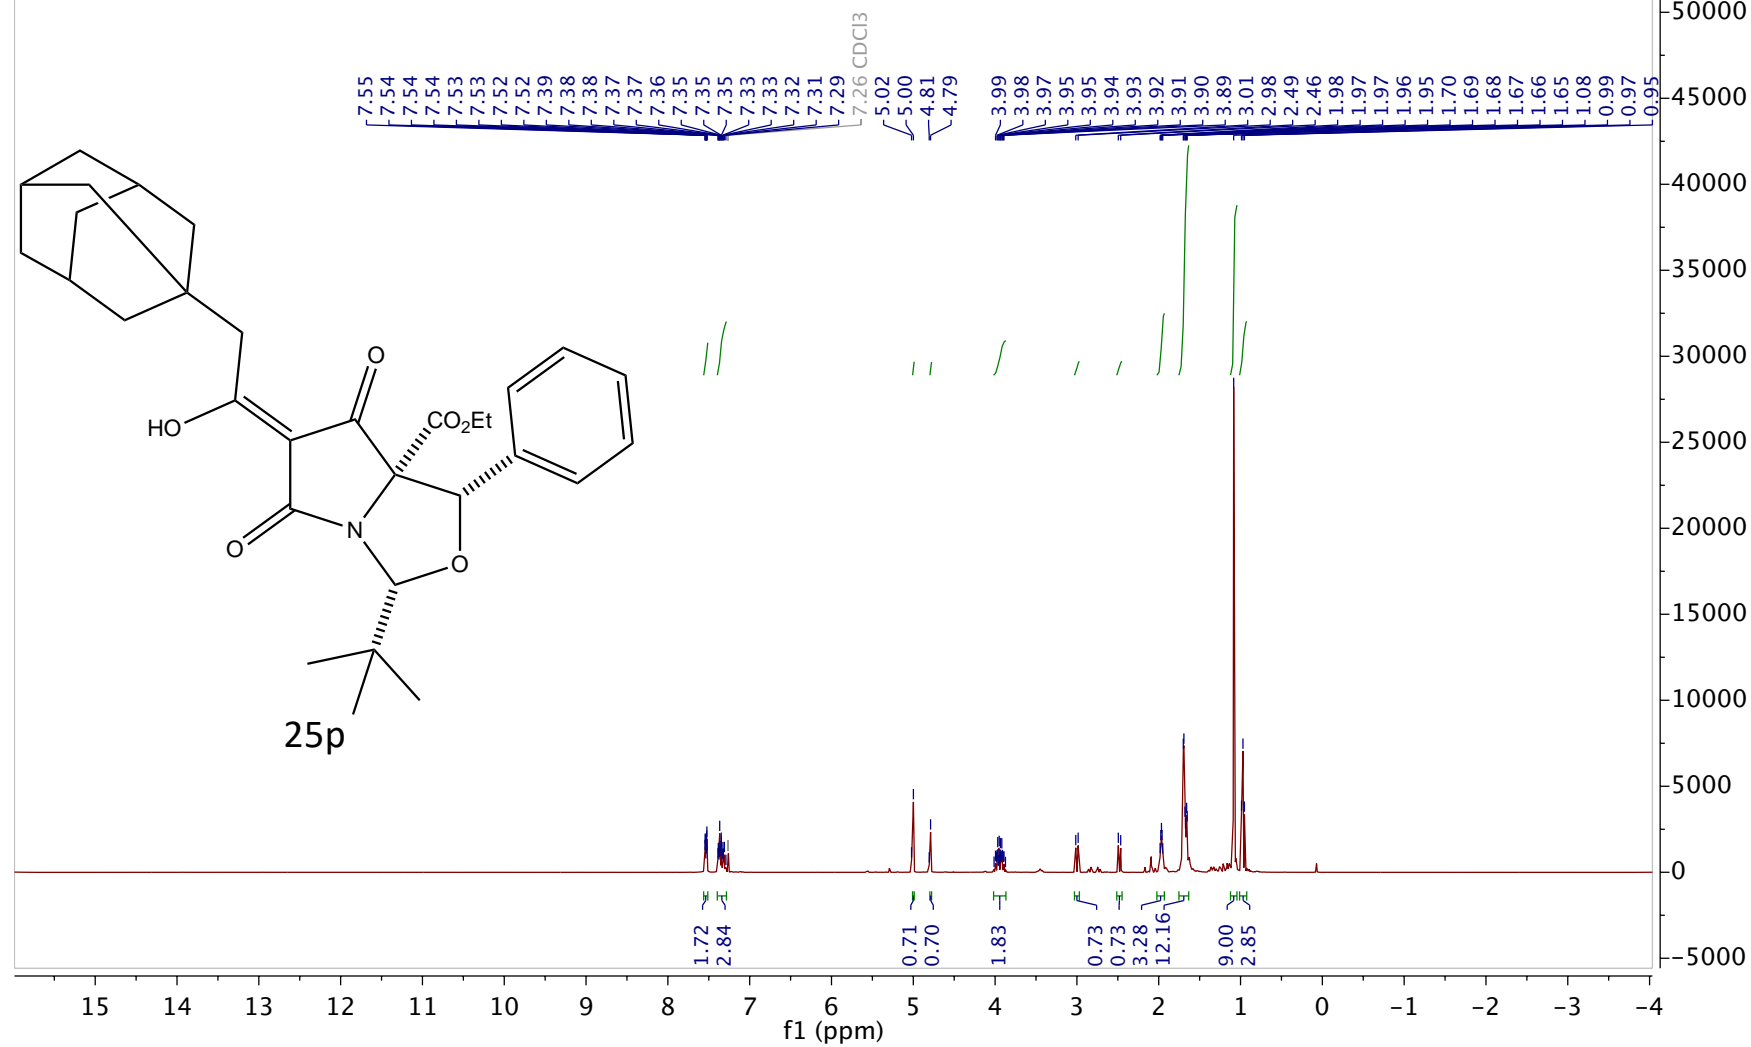

Dec22-2020-4-LS890(P) B6-H6.4.fid  
Instrument AVG400  
Group MGM  
Chemist Liban Saney  
Project Account Code DM7300  
c13acq\_512.crl CDCl3 {C:\NMR} mgmgrp 4

<sup>13</sup>C NMR (101 MHz, CDCl<sub>3</sub>)

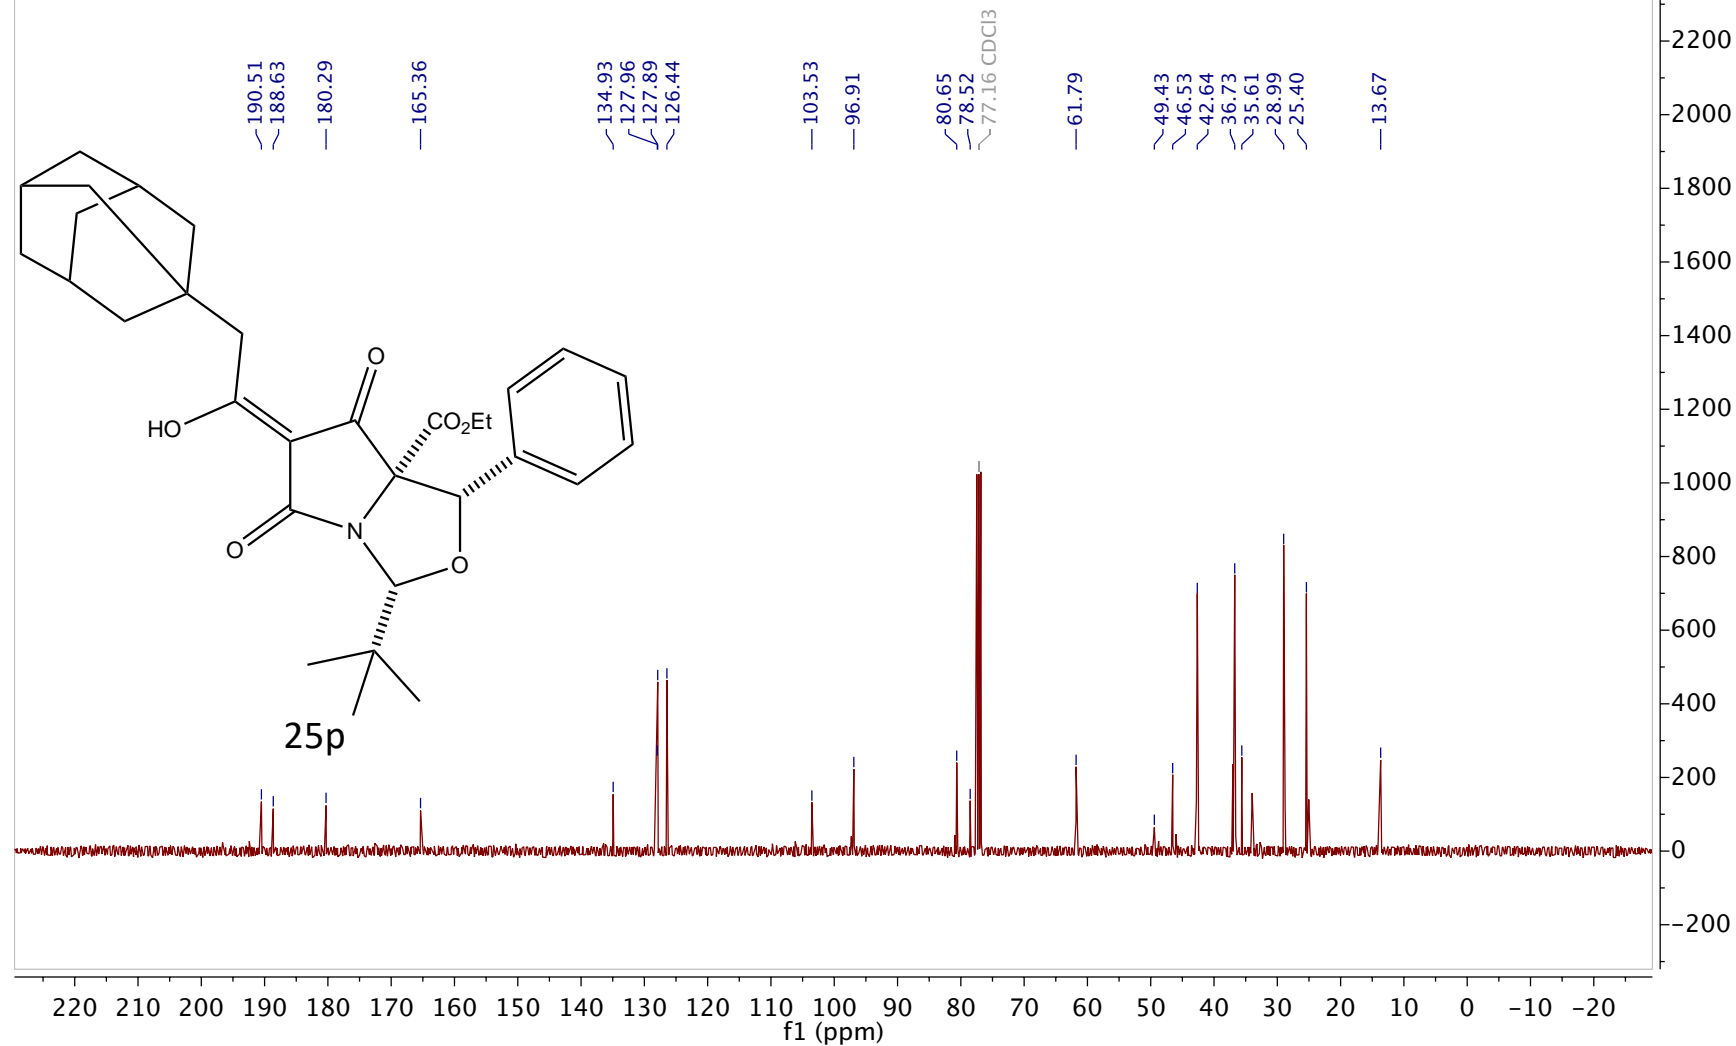

Jan05-2021-5-LS895(P) E3-I3.1.fid  
Instrument AVH400  
Group MGM  
Chemist Liban Saney  
Project Account Code DM7300  
h1acq.crl CDCl3 {C:\NMR} mgmgrp 5

<sup>1</sup>H NMR (400 MHz, CDCl<sub>3</sub>)

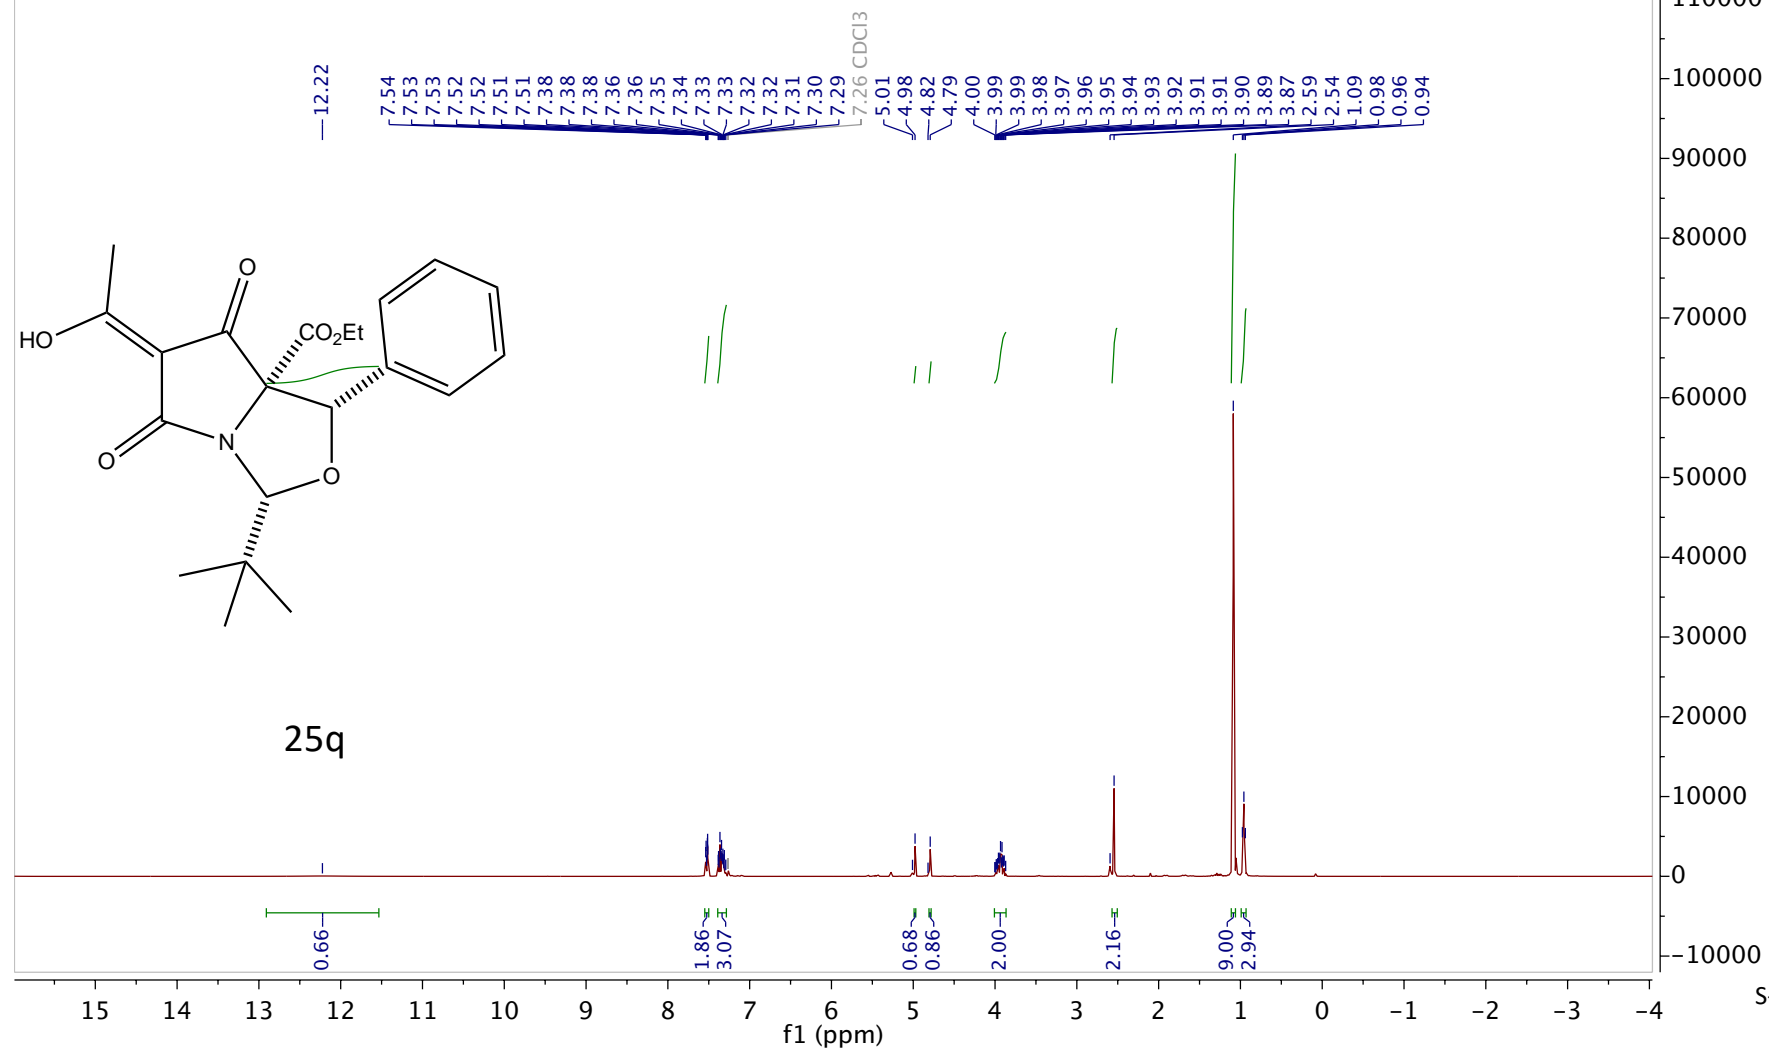

Jan05-2021-5-LS895(P) E3-I3.4.fid  
Instrument AVH400  
Group MGM  
Chemist Liban Saney  
Project Account Code DM7300  
c13acq\_512.crl CDCl3 {C:\NMR} mgmgrp 5

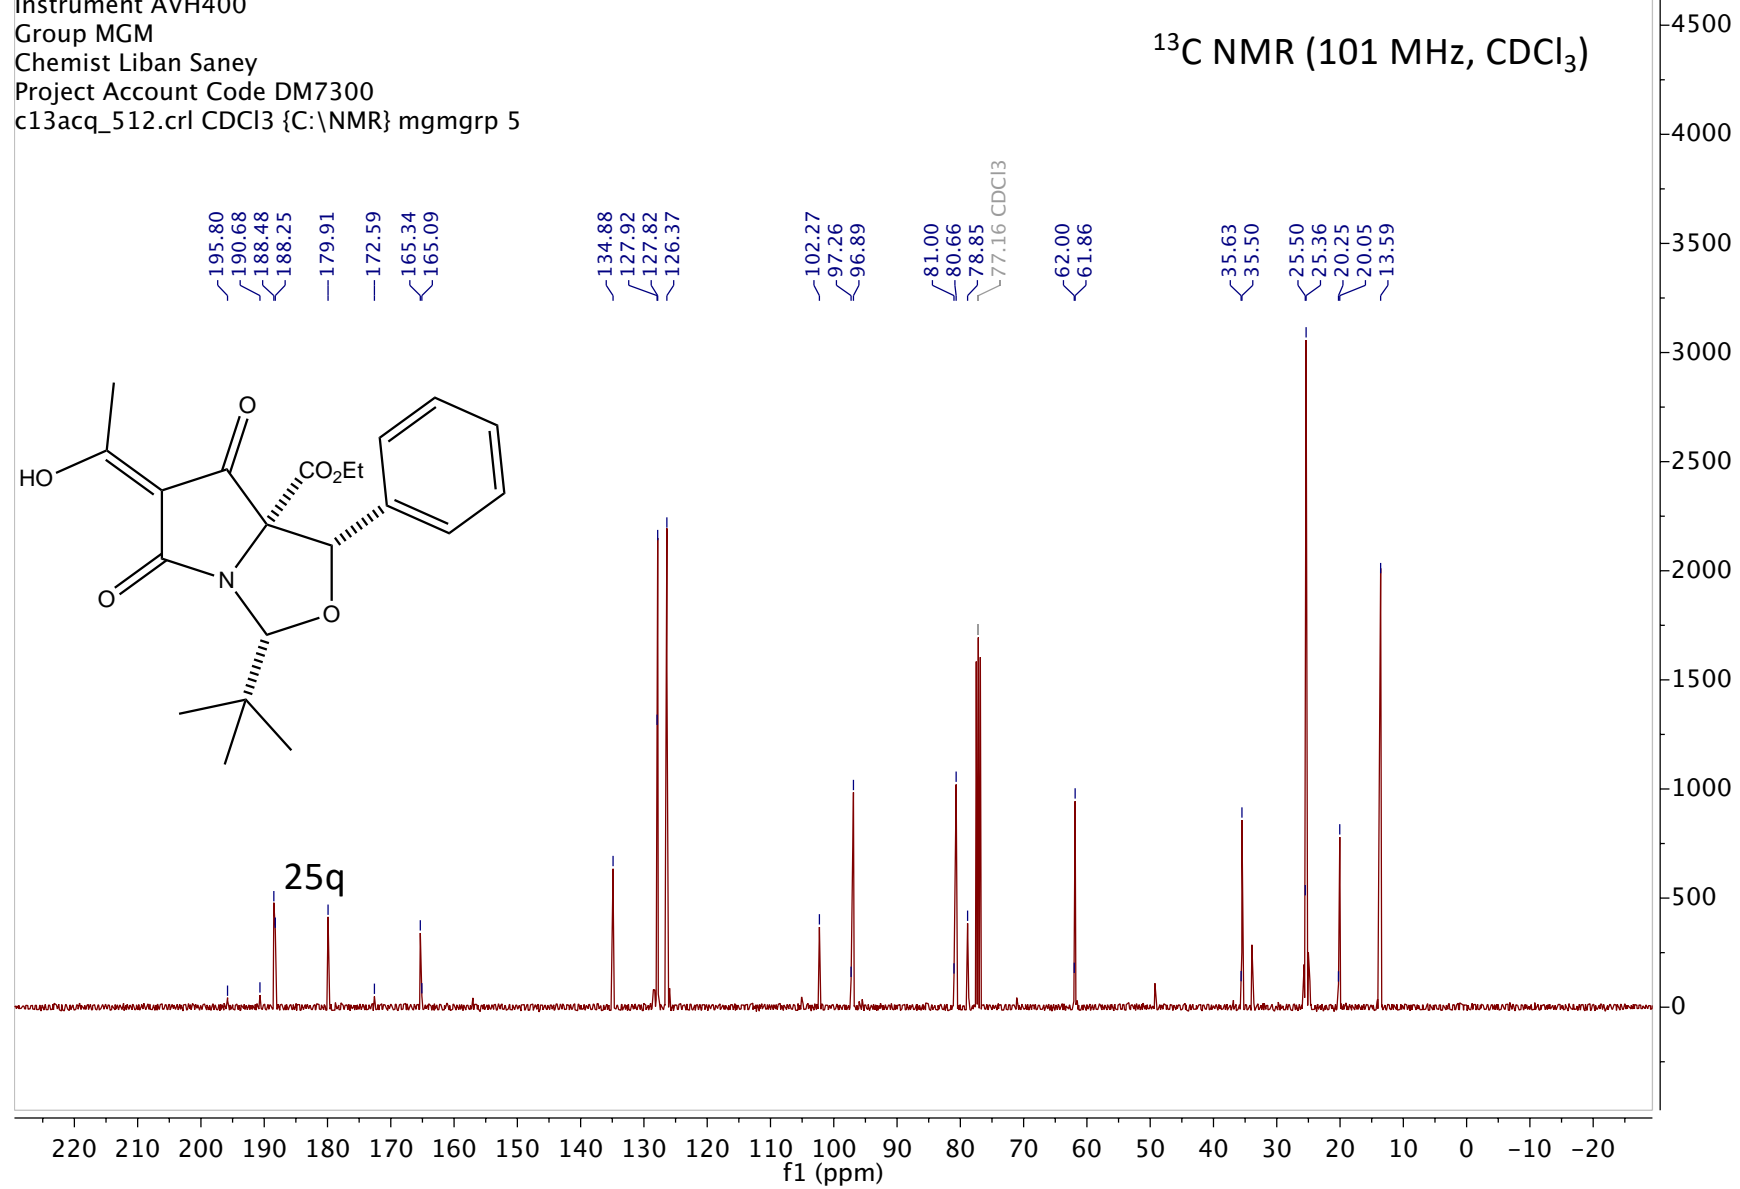

Jan08-2021-7-LS897(P) E6-H5.1.fid  
Instrument AVH400  
Group MGM  
Chemist Liban Saney  
Project Account Code DM7300  
h1acq.crl CDCl3 {C:\NMR} mgmgrp 7

<sup>1</sup>H NMR (400 MHz, CDCl<sub>3</sub>)

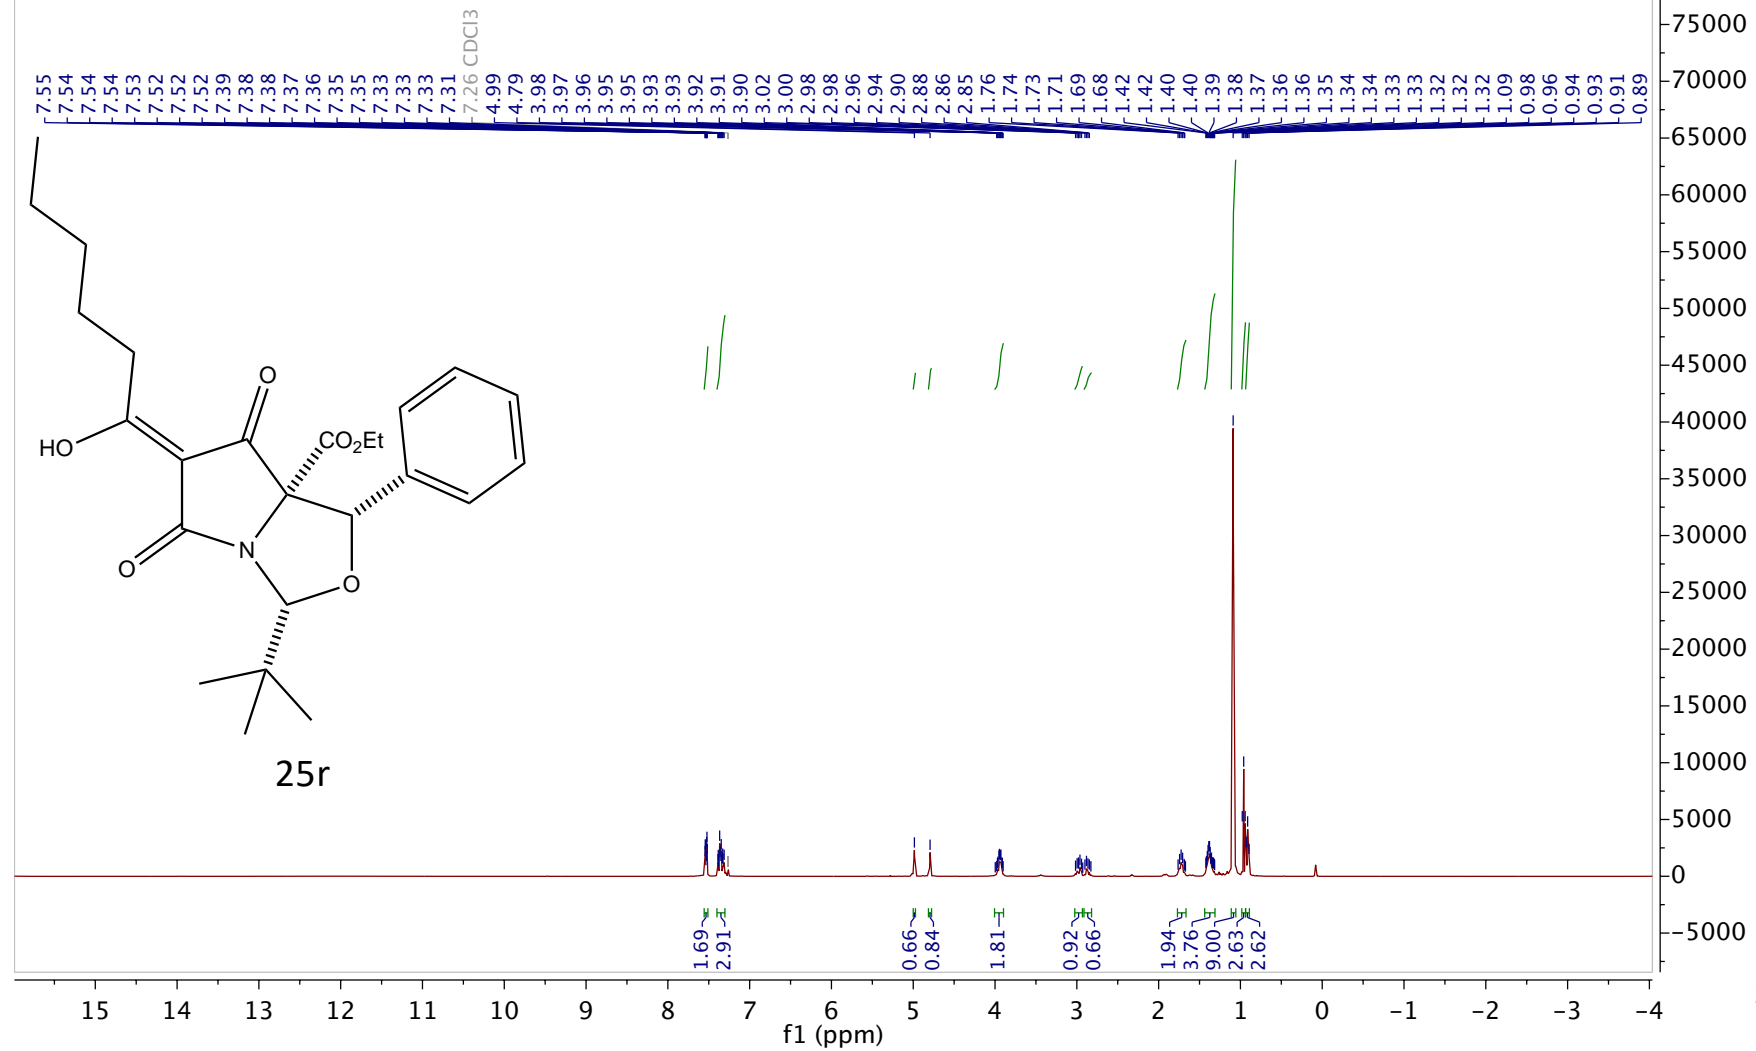

Jan08-2021-7-LS897(P) E6-H5.4.fid  
Instrument AVH400  
Group MGM  
Chemist Liban Saney  
Project Account Code DM7300  
c13acq\_512.crl CDCl3 {C:\NMR} mgmgrp 7

<sup>13</sup>C NMR (101 MHz, CDCl<sub>3</sub>)

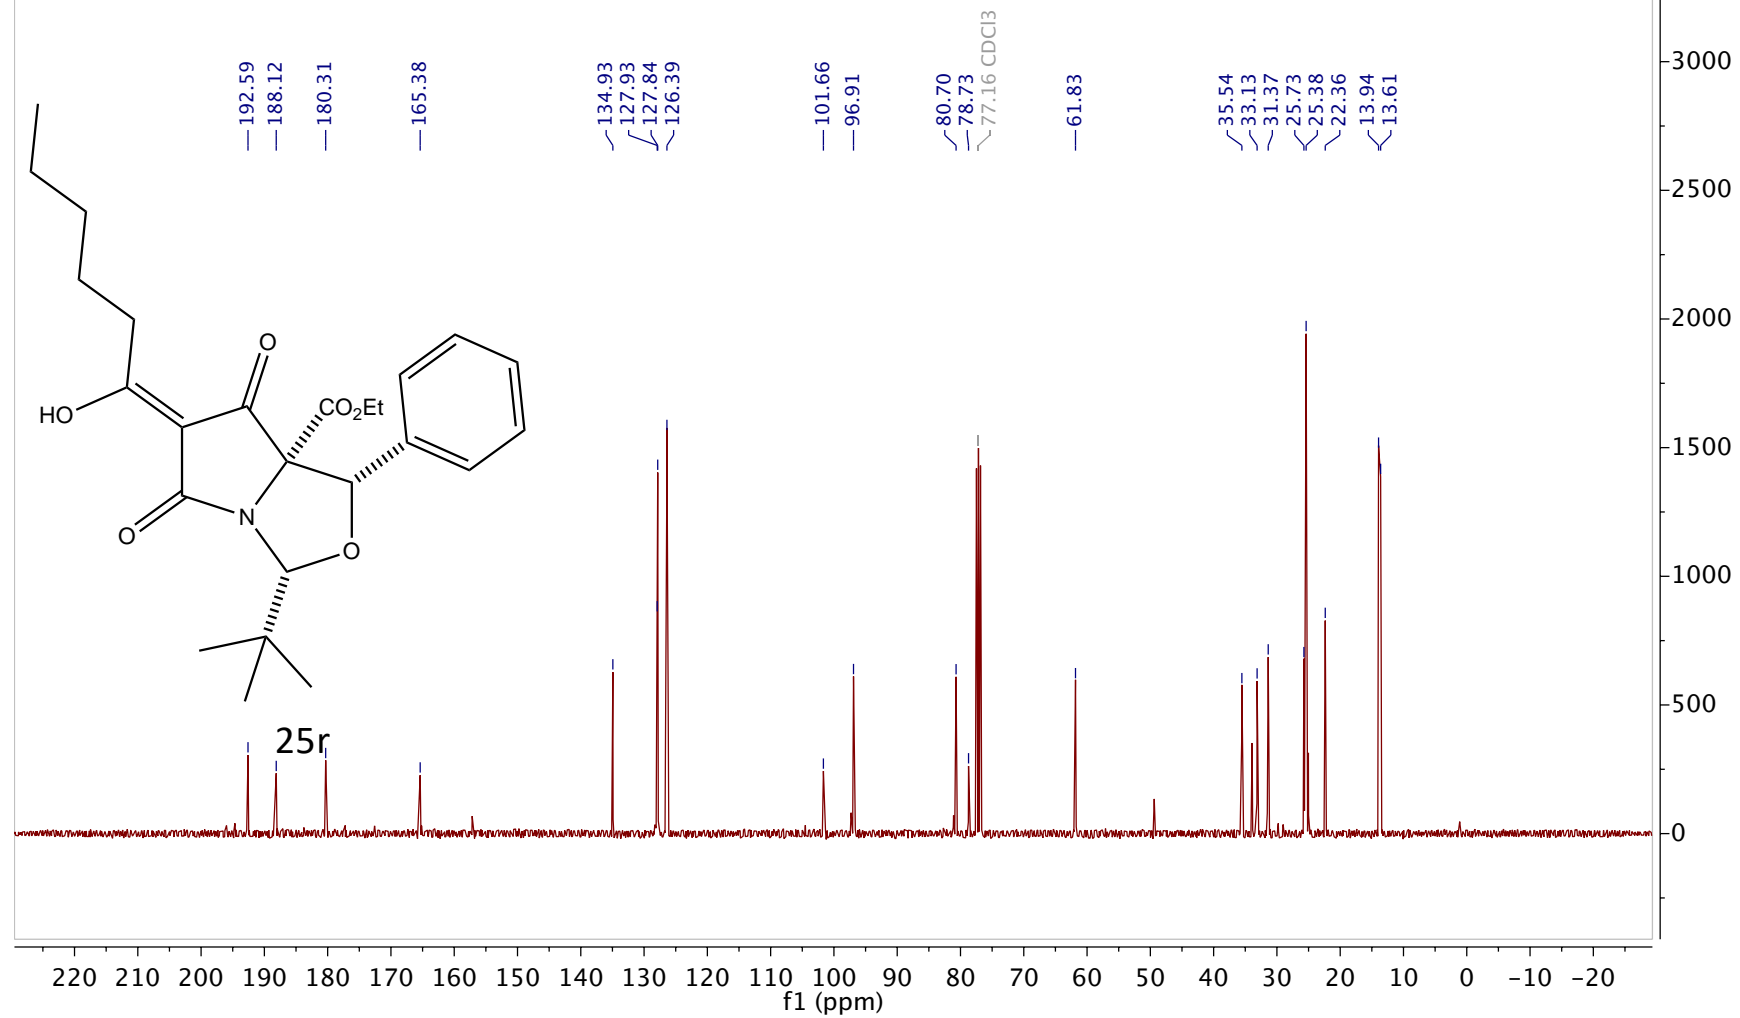



Jan09-2021-5-LS898(P) E1-G5.1.fid  
Instrument AVH400  
Group MGM  
Chemist Liban Saney  
Project Account Code DM7300  
h1acq.crl CDCl3 {C:\NMR} mgmgrp 5

<sup>1</sup>H NMR (400 MHz, CDCl<sub>3</sub>)

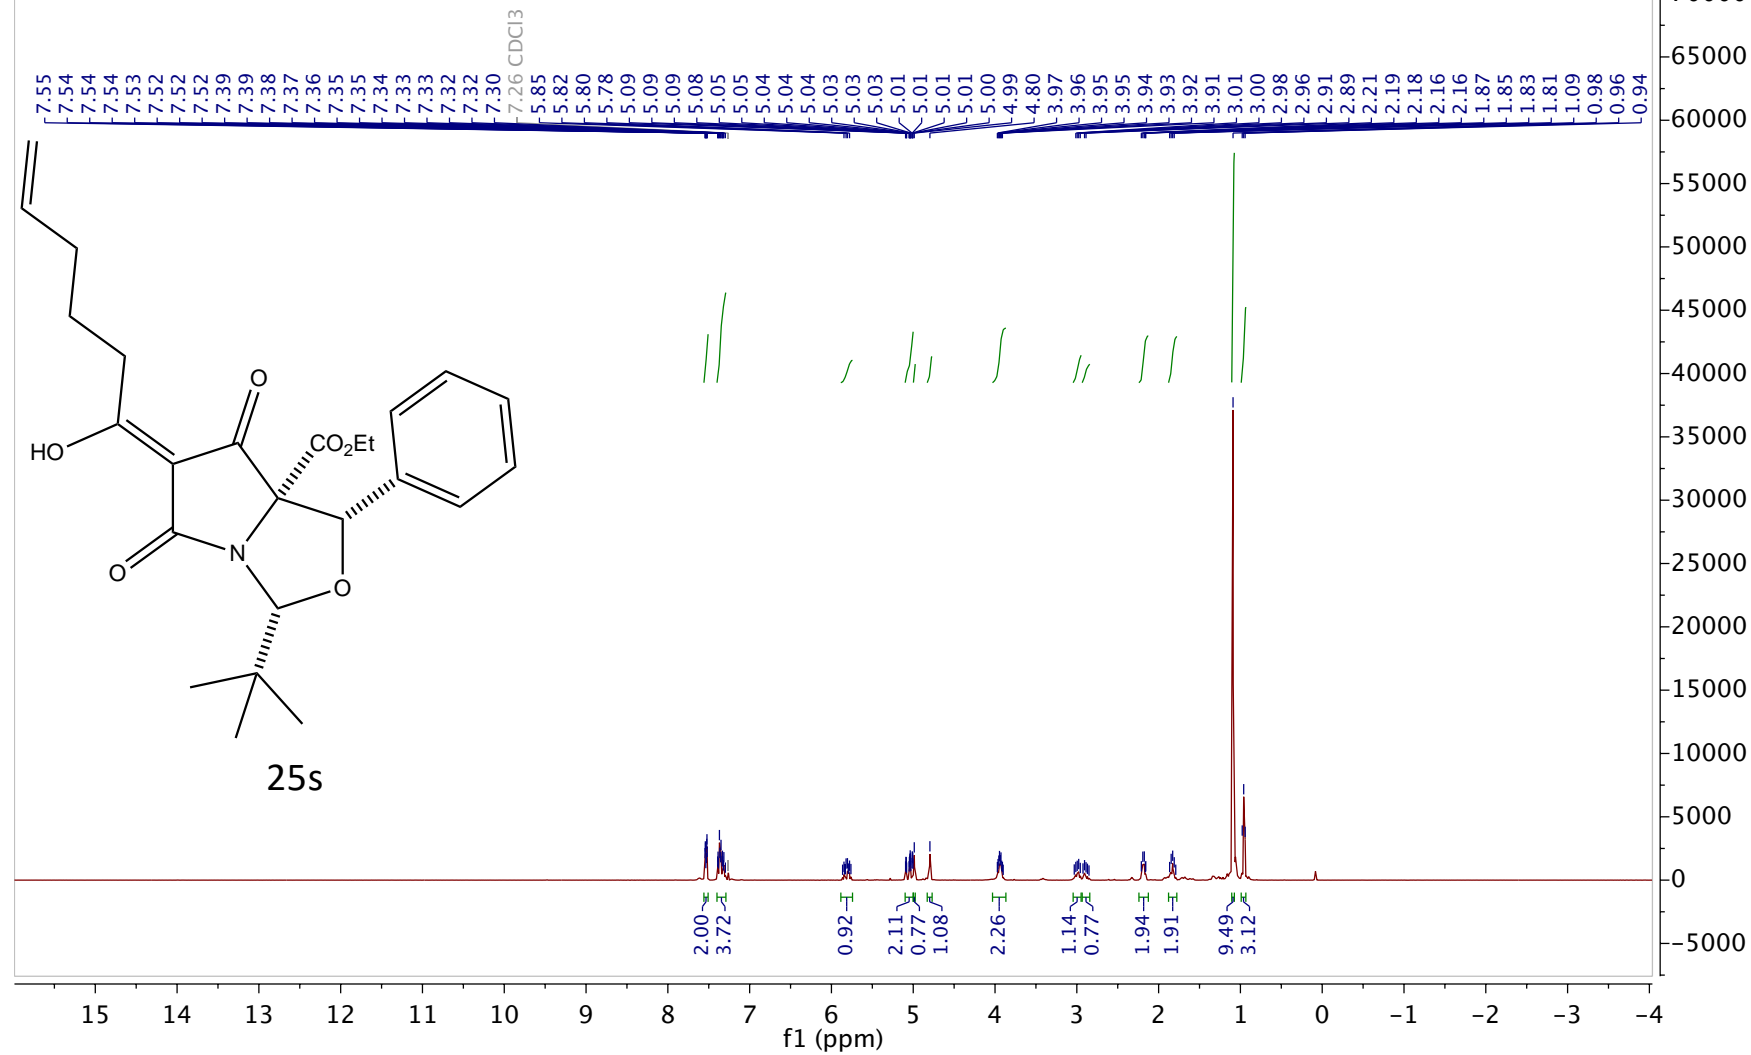

Jan09-2021-5-LS898(P) E1-G5.4.fid  
Instrument AVH400  
Group MGM  
Chemist Liban Saney  
Project Account Code DM7300  
c13acq\_512.crl CDCl3 {C:\NMR} mgmgrp 5

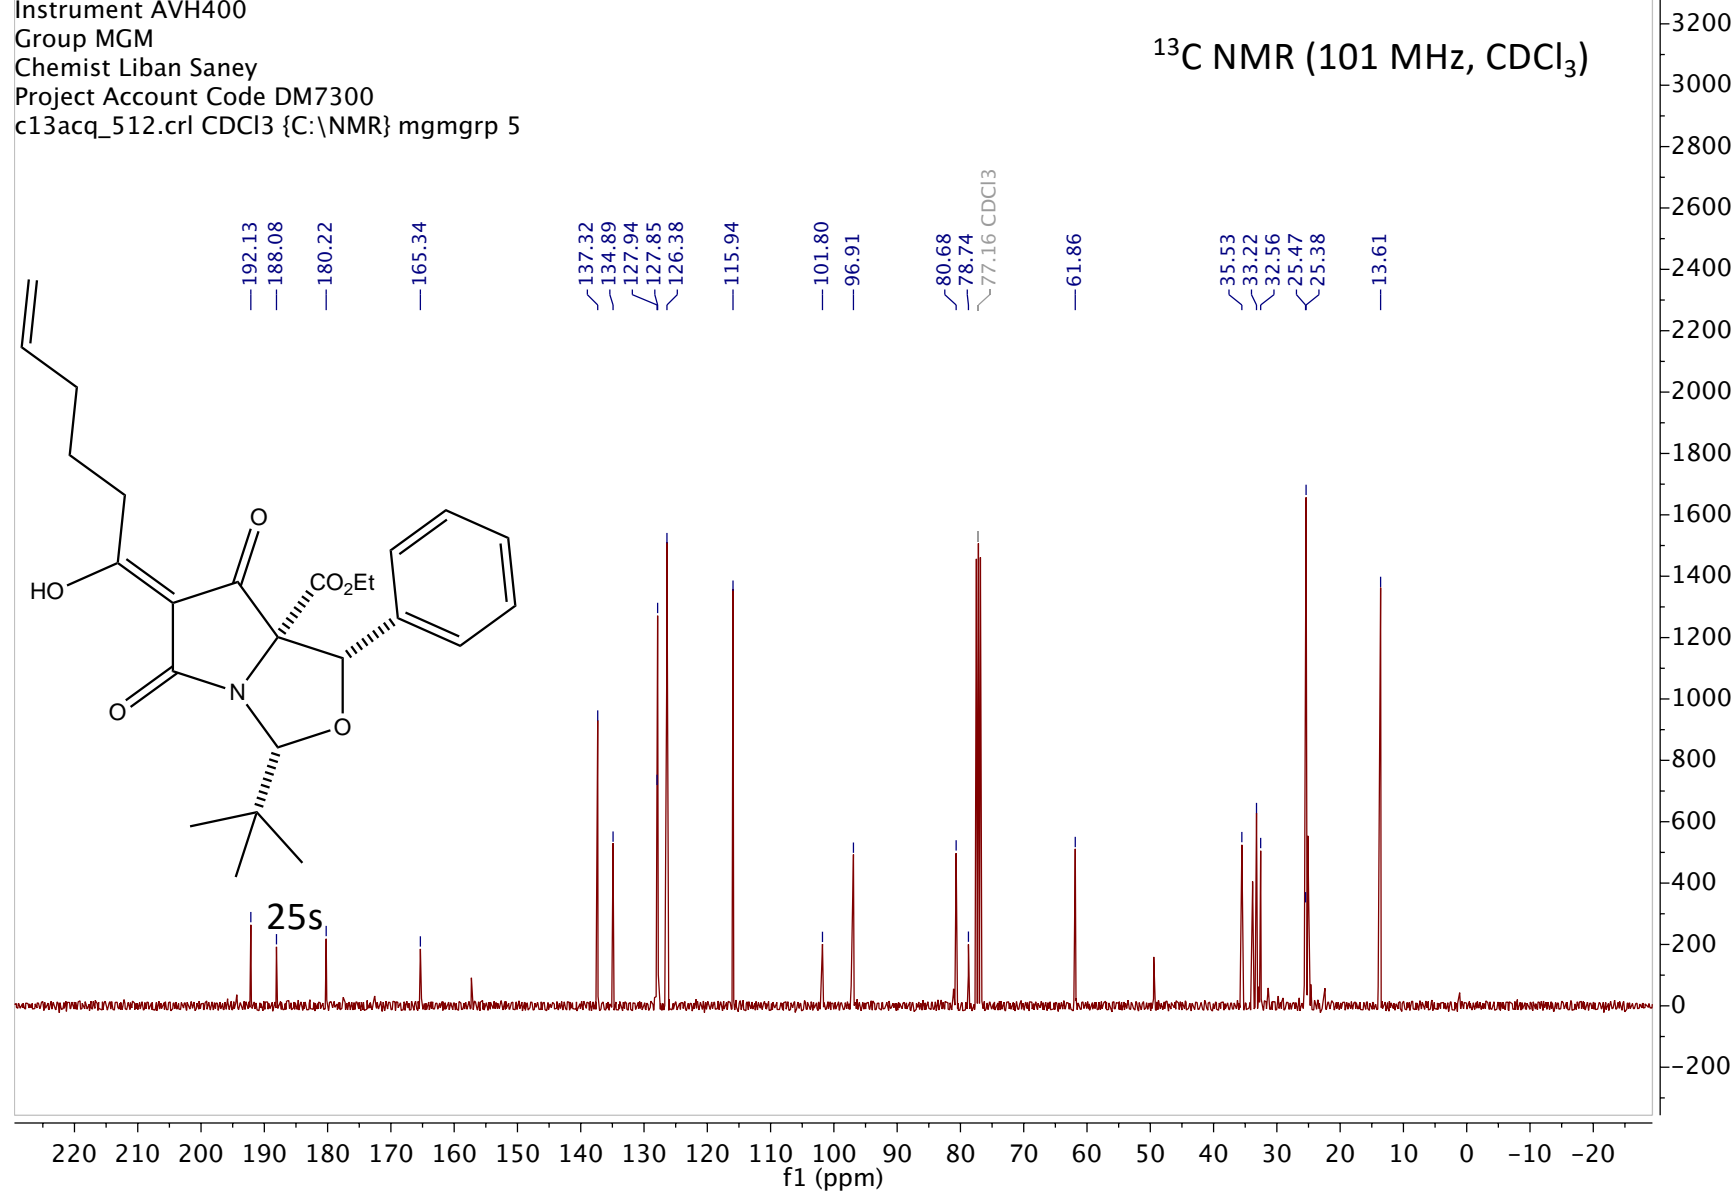

Jan23-2021-22-LS845(P).1.fid  
Instrument AVH400  
Group MGM  
Chemist Liban Saney  
Project Account Code DM7300  
h1acq.crl CDCl3 {C:\NMR} mgmgrp 22

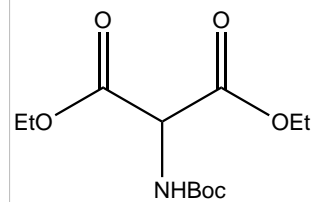

27b

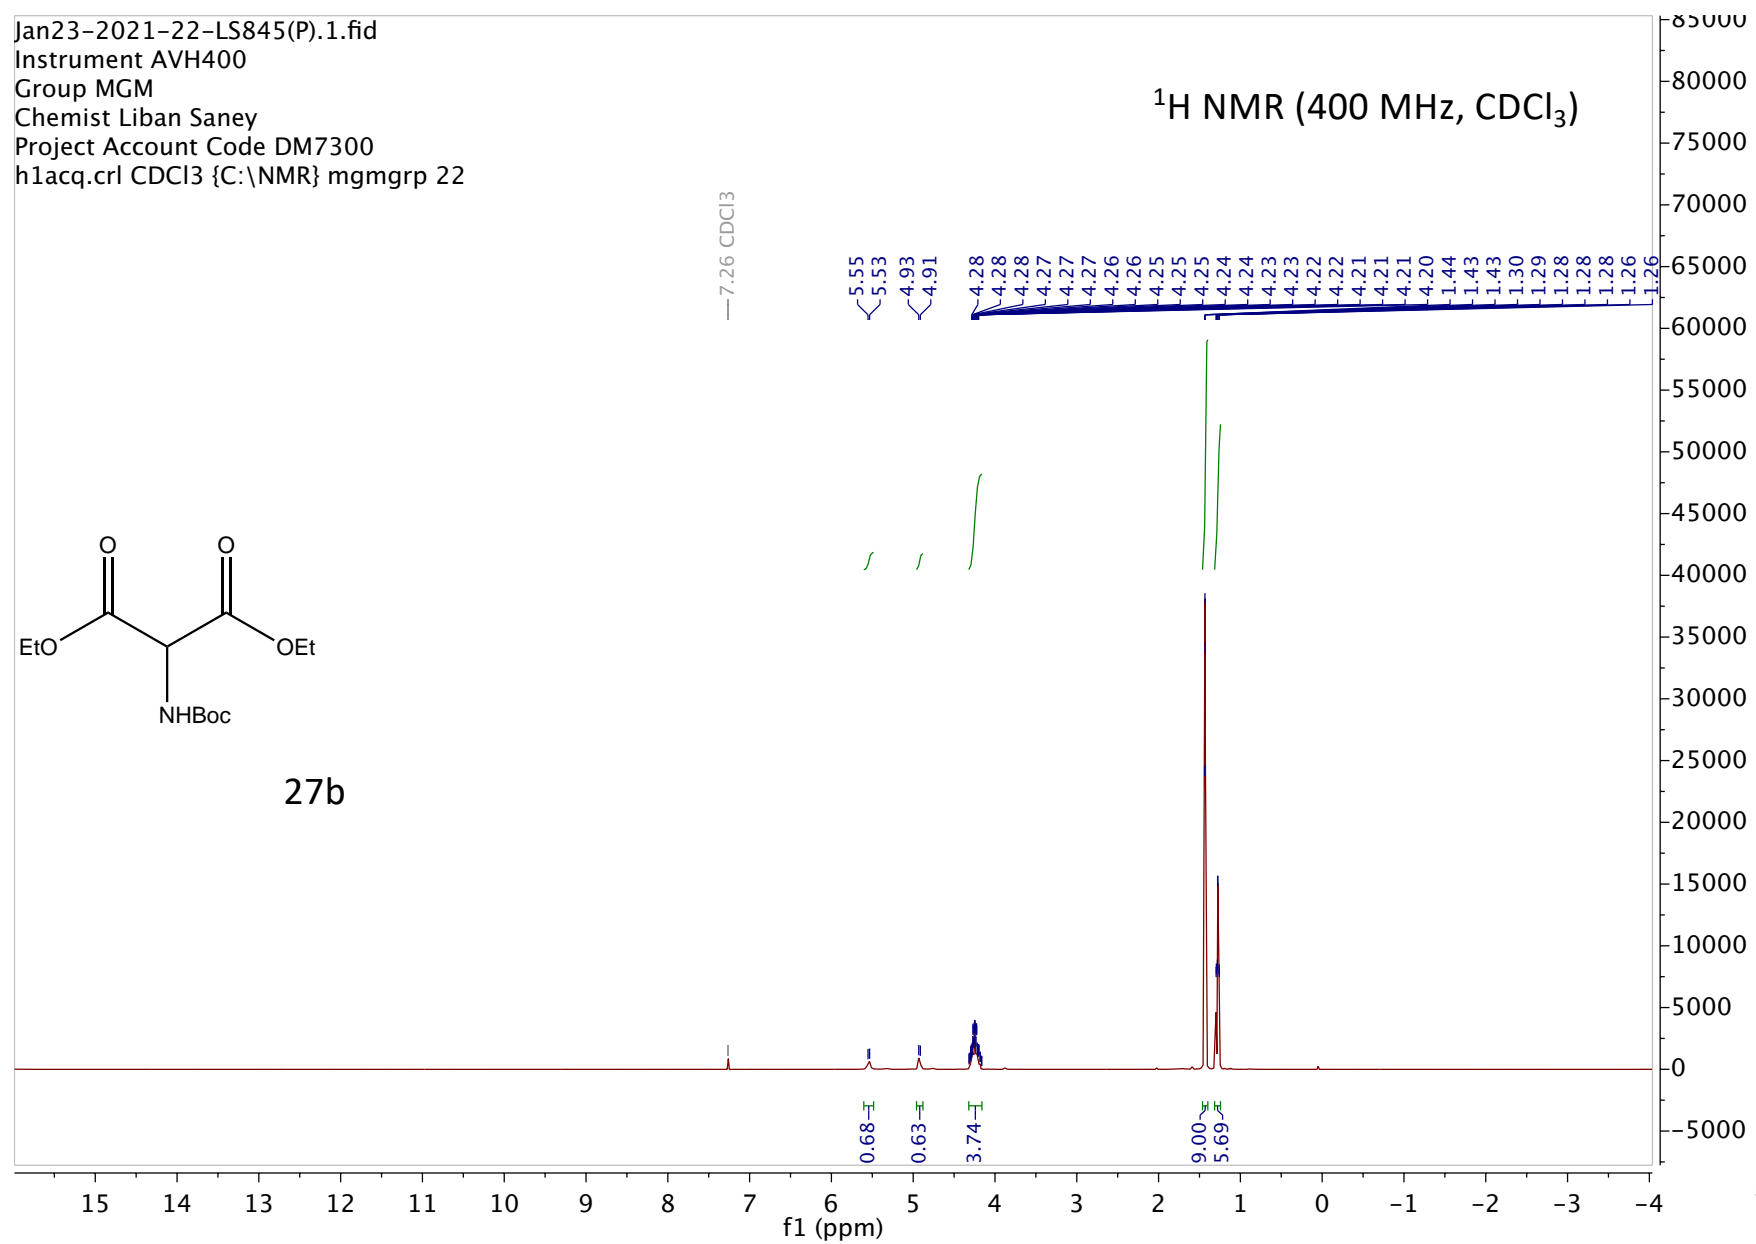

Jan23-2021-22-LS845(P).4.fid  
Instrument AVH400  
Group MGM  
Chemist Liban Saney  
Project Account Code DM7300  
c13acq\_512.crl CDCl3 {C:\NMR} mgmgrp 22

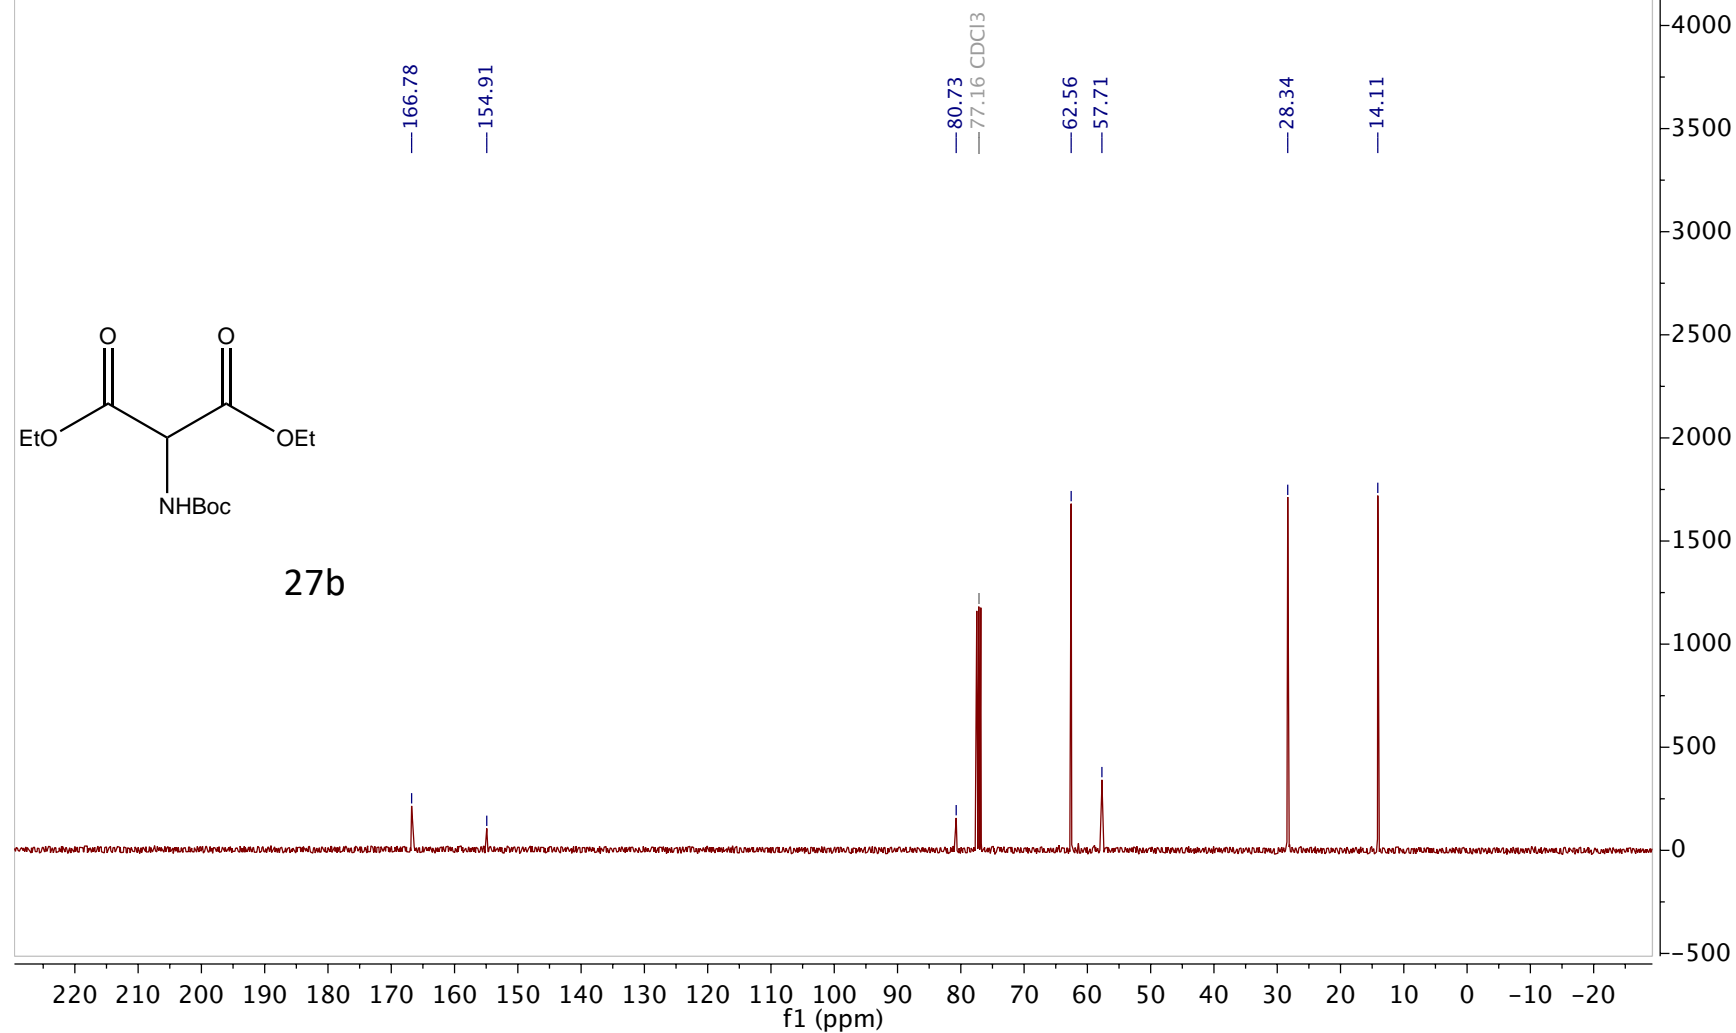

Nov17-2020-18-LS851(C).1.fid  
Instrument AVH400  
Group MGM  
Chemist Liban Saney  
Project Account Code DM7300  
h1acq.crl CDCl3 {C:\NMR} mgmgrp 18

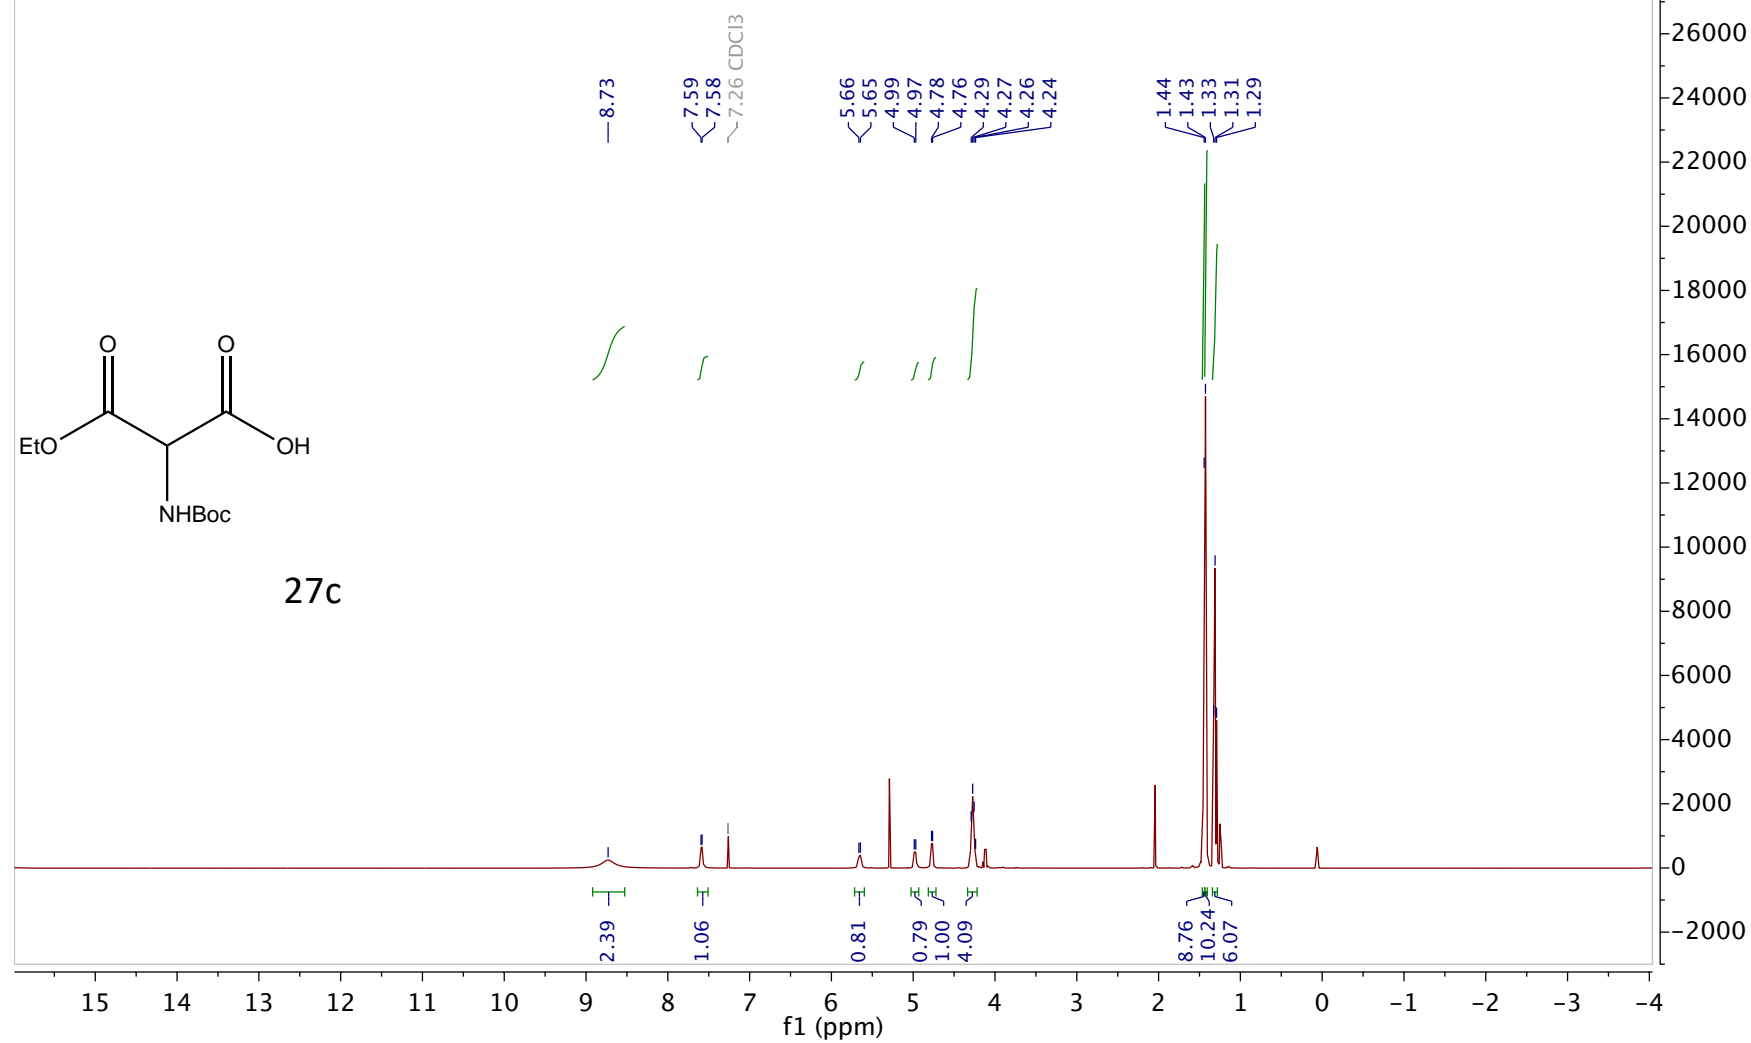

Nov17-2020-18-LS851(C).4.fid  
Instrument AVH400  
Group MGM  
Chemist Liban Saney  
Project Account Code DM7300  
c13acq\_512.crl CDCl3 {C:\NMR} mgmgrp 18

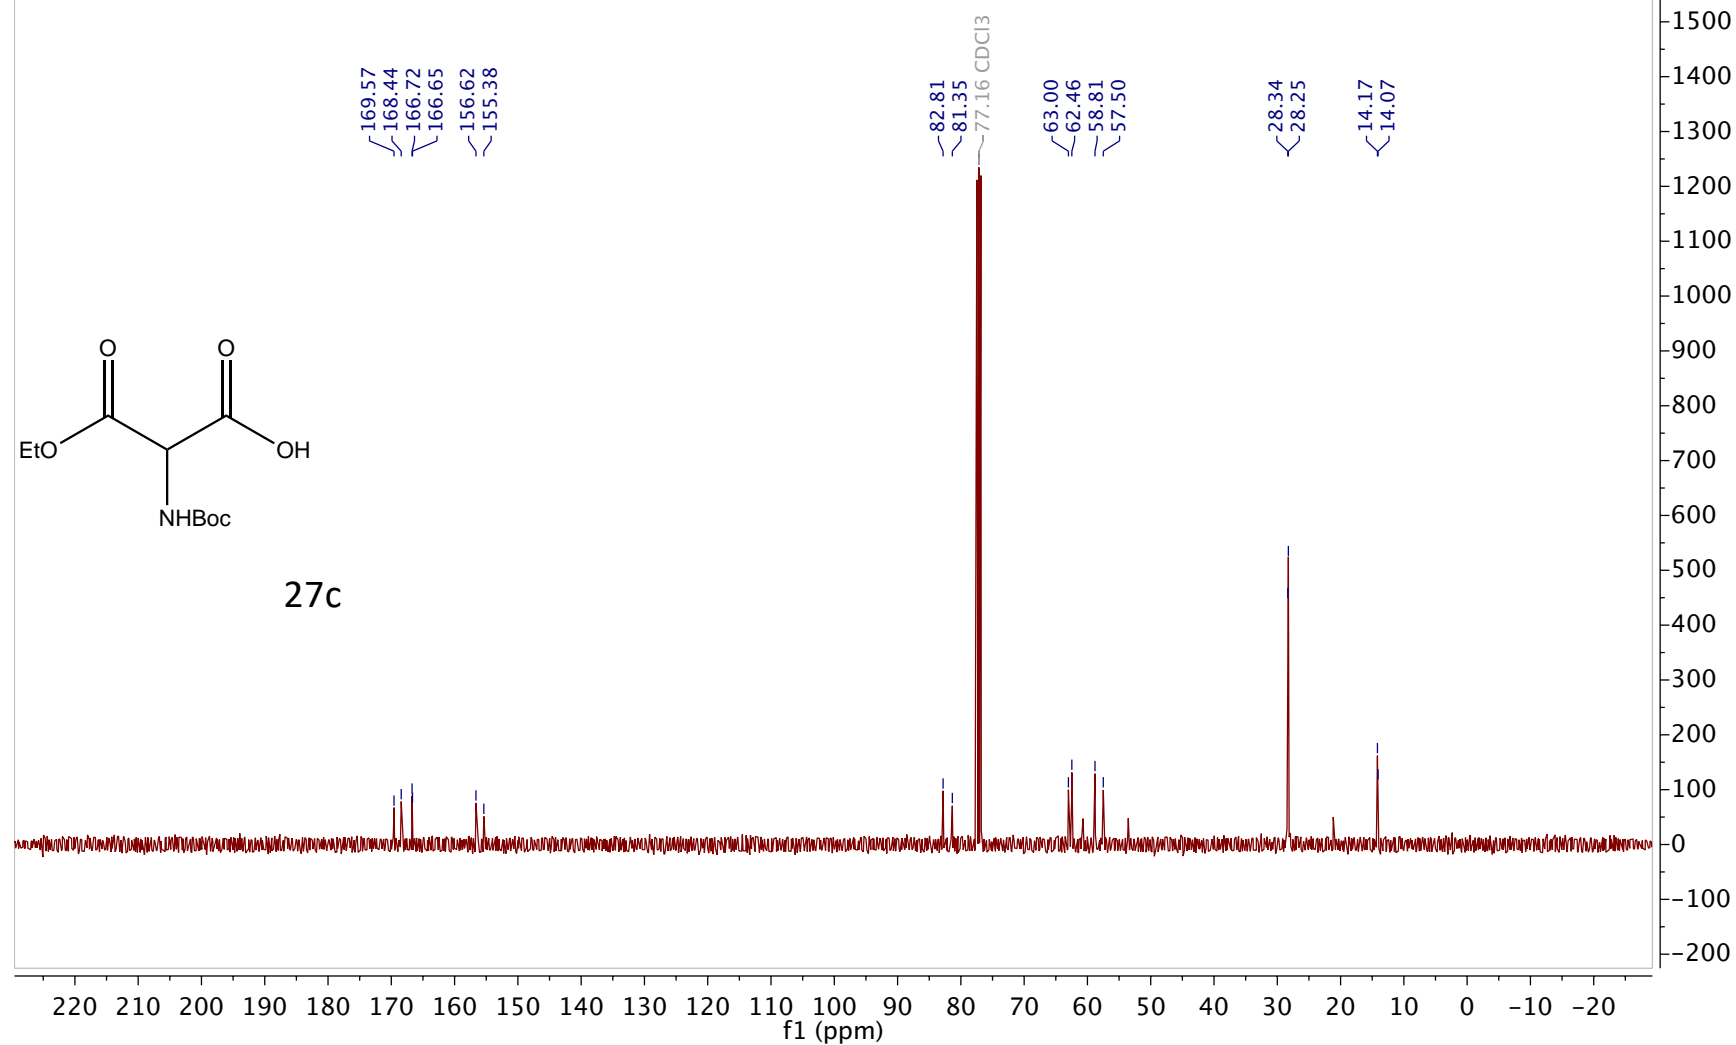

Jan13-2021-50-LS903(C).1.fid  
Instrument AVH400  
Group MGM  
Chemist Liban Saney  
Project Account Code DM7300  
h1acq.crl D2O {C:\NMR} mgmgrp 50

<sup>1</sup>H NMR (400 MHz, D<sub>2</sub>O)

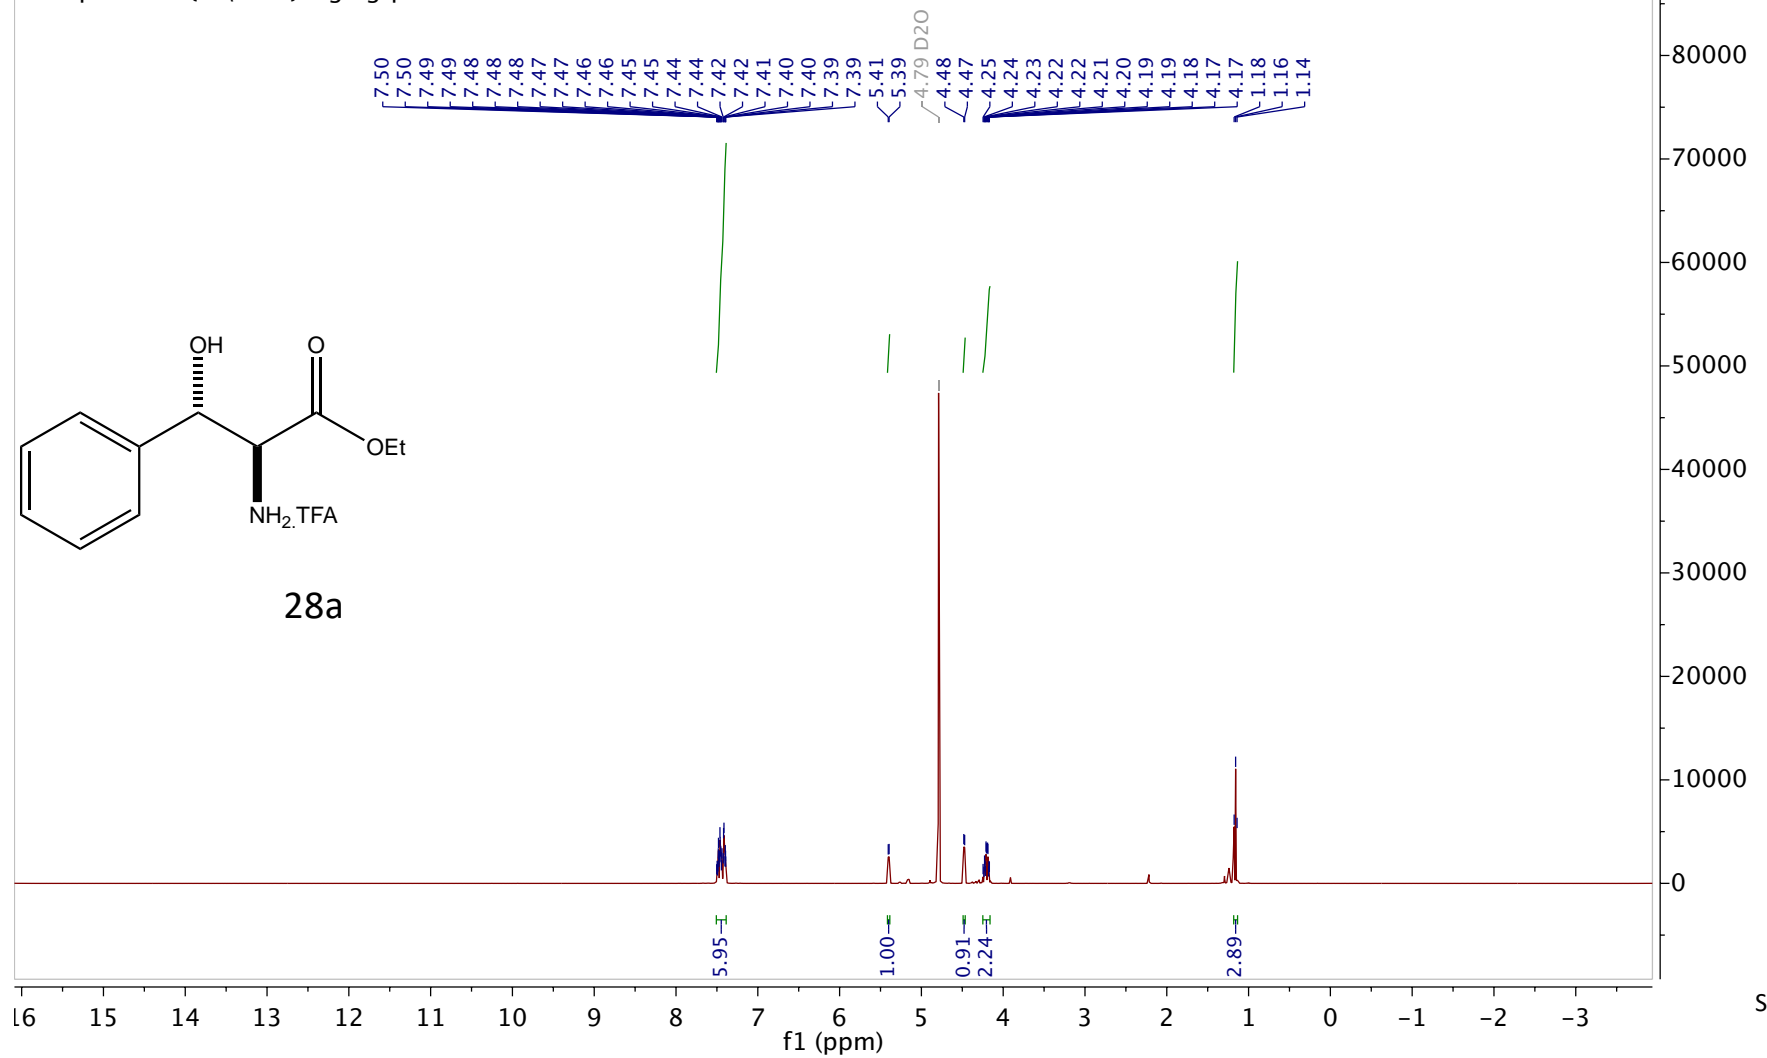

Jan13-2021-50-LS903(C).4.fid  
Instrument AVH400  
Group MGM  
Chemist Liban Saney  
Project Account Code DM7300  
c13acq\_512.crl D2O {C:\NMR} mgmgrp 50

$^{13}\text{C}$  NMR (101 MHz,  $\text{D}_2\text{O}$ )

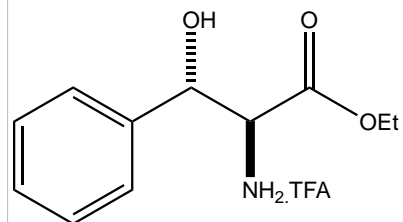

28a

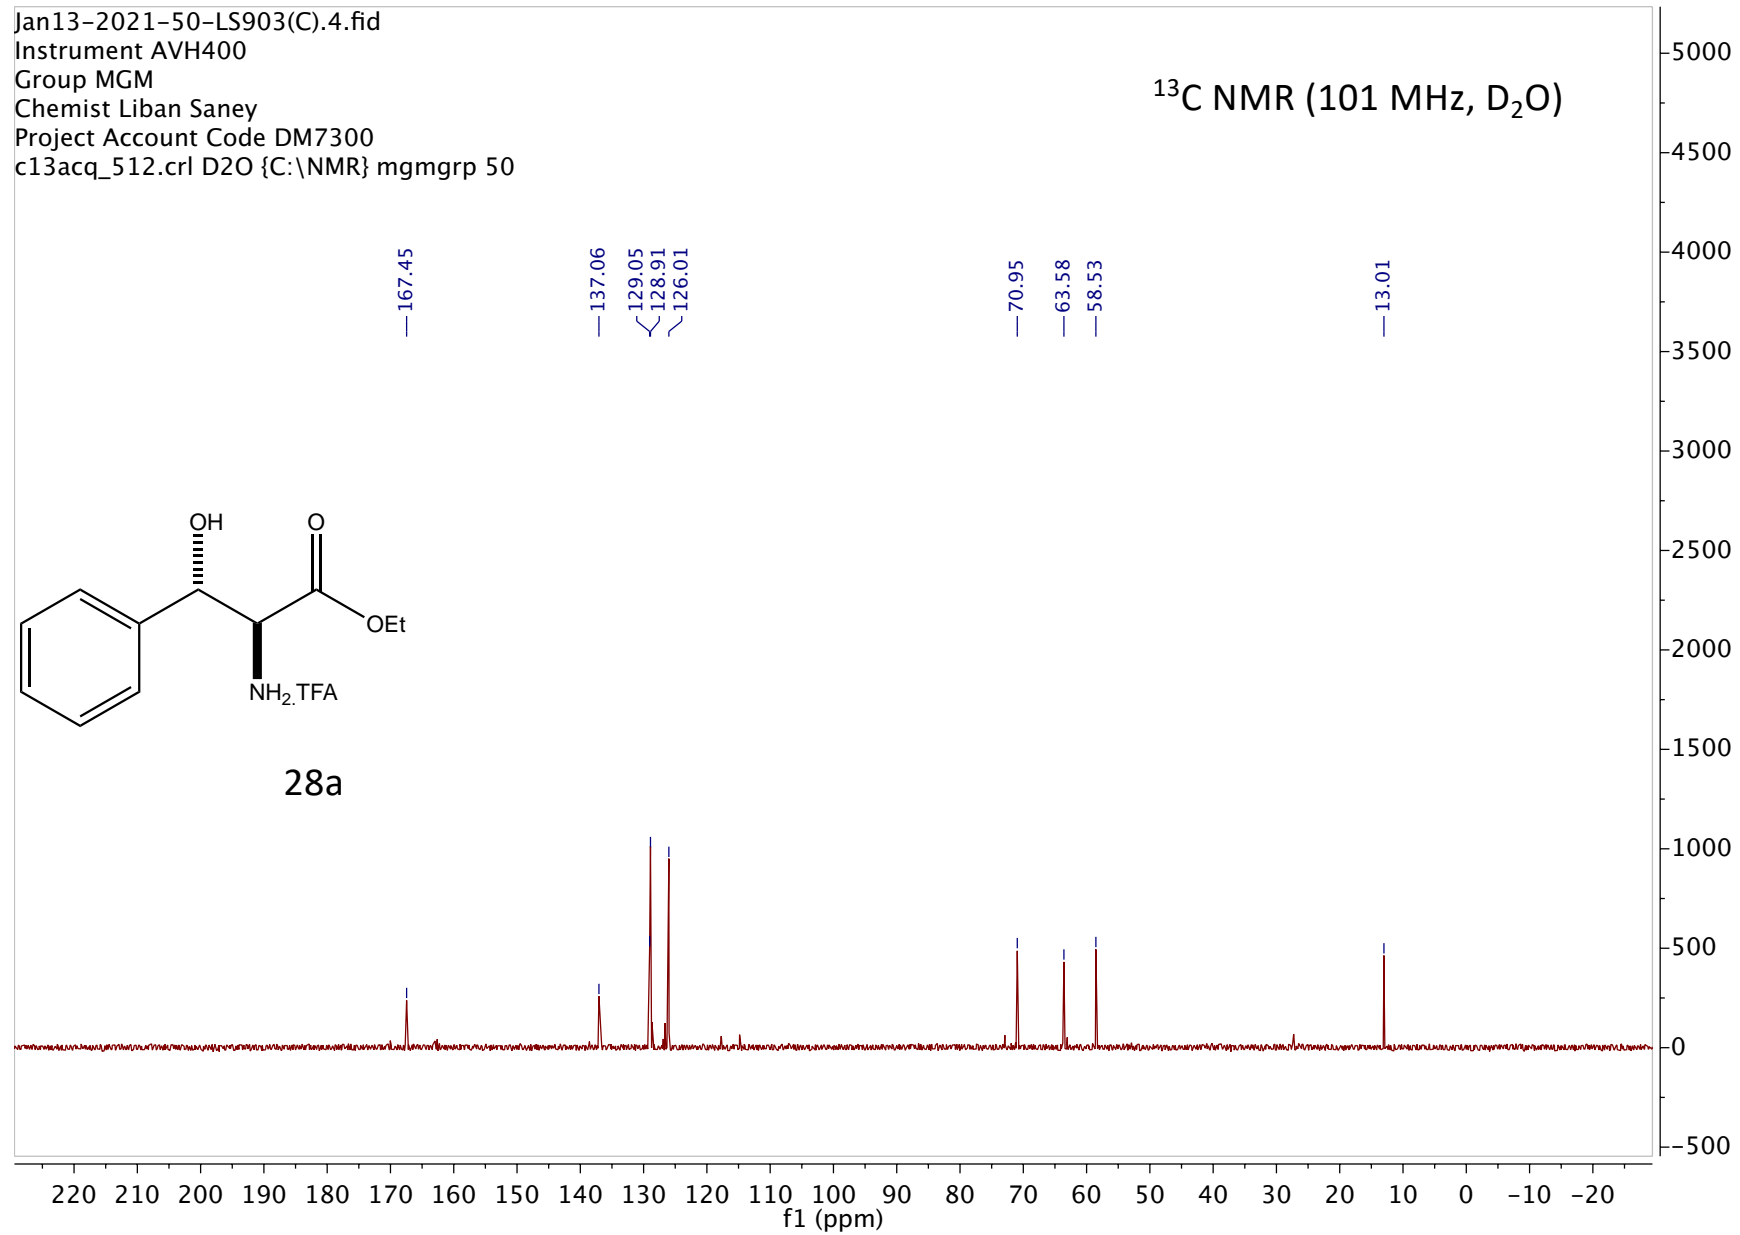



Jan18-2021-12-LS908(C).1.fid  
Instrument AVH400  
Group MGM  
Chemist Liban Saney  
Project Account Code DM7300  
h1acq.crl D2O {C:\NMR} mgmgrp 12

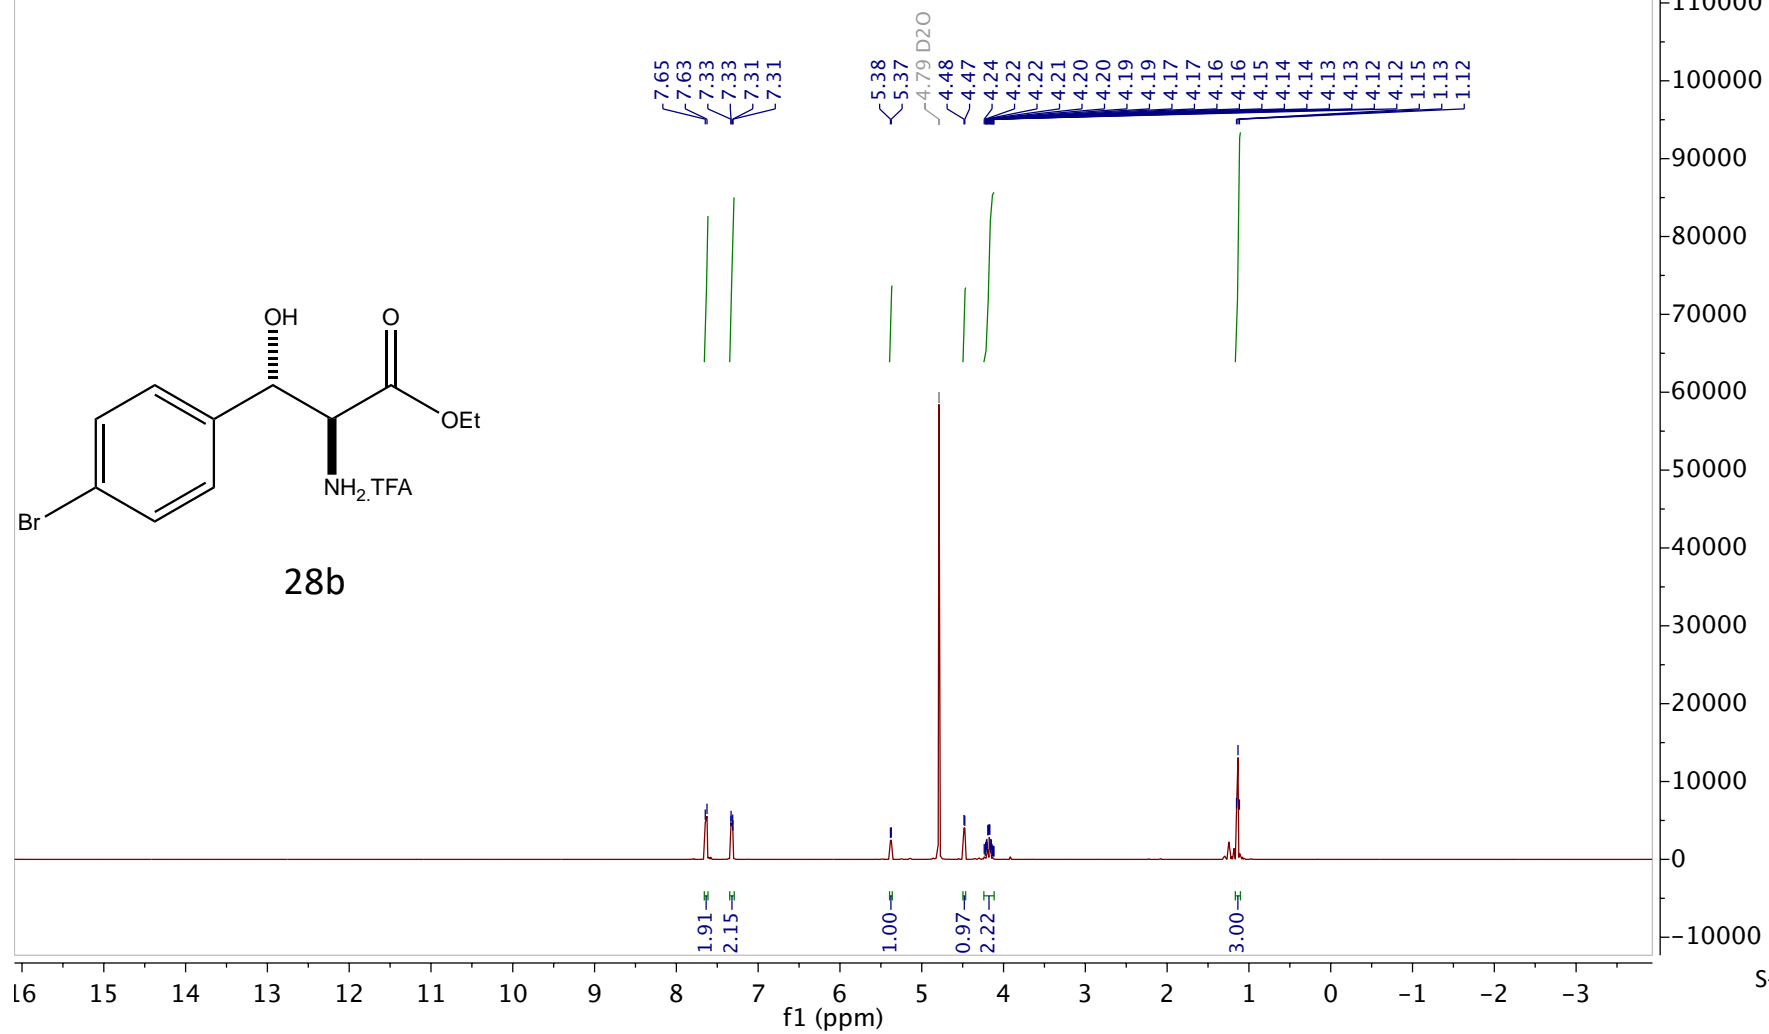

Jan18-2021-12-LS908(C).4.fid  
Instrument AVH400  
Group MGM  
Chemist Liban Saney  
Project Account Code DM7300  
c13acq\_512.crl D2O {C:\NMR} mgmgrp 12

$^{13}\text{C}$  NMR (101 MHz,  $\text{D}_2\text{O}$ )

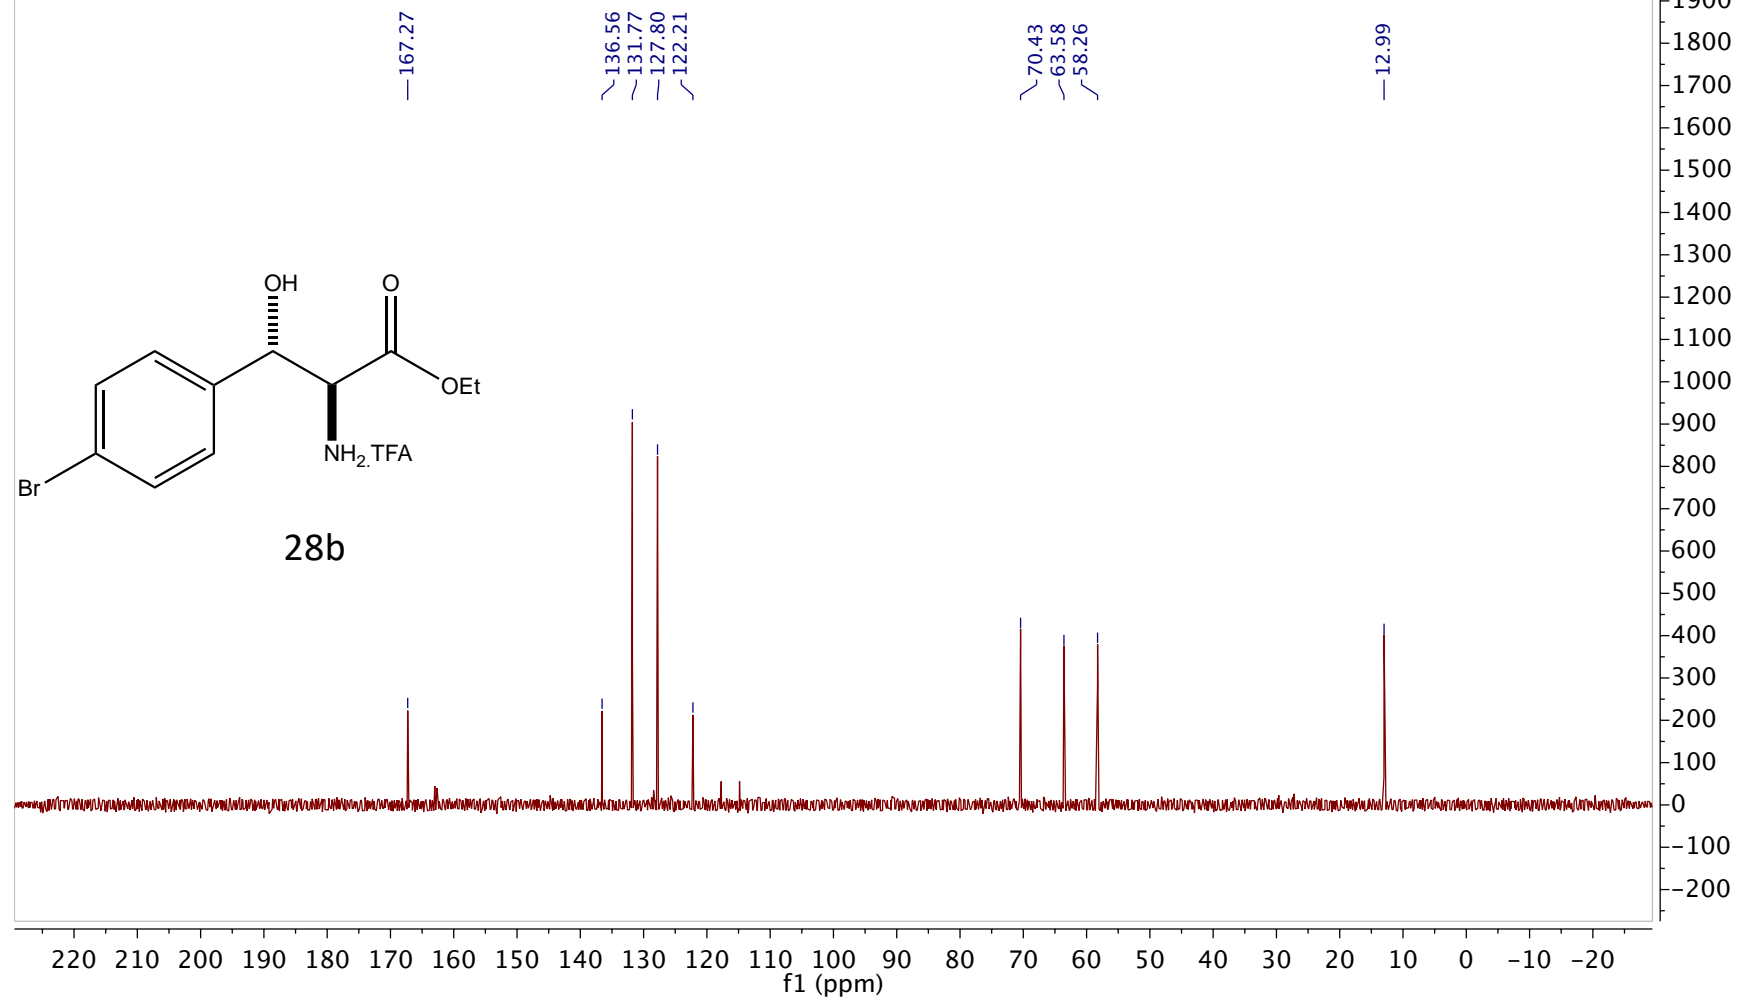

Jan18-2021-11-LS907(C).1.fid  
Instrument AVH400  
Group MGM  
Chemist Liban Saney  
Project Account Code DM7300  
h1acq.crl D2O {C:\NMR} mgmgrp 11

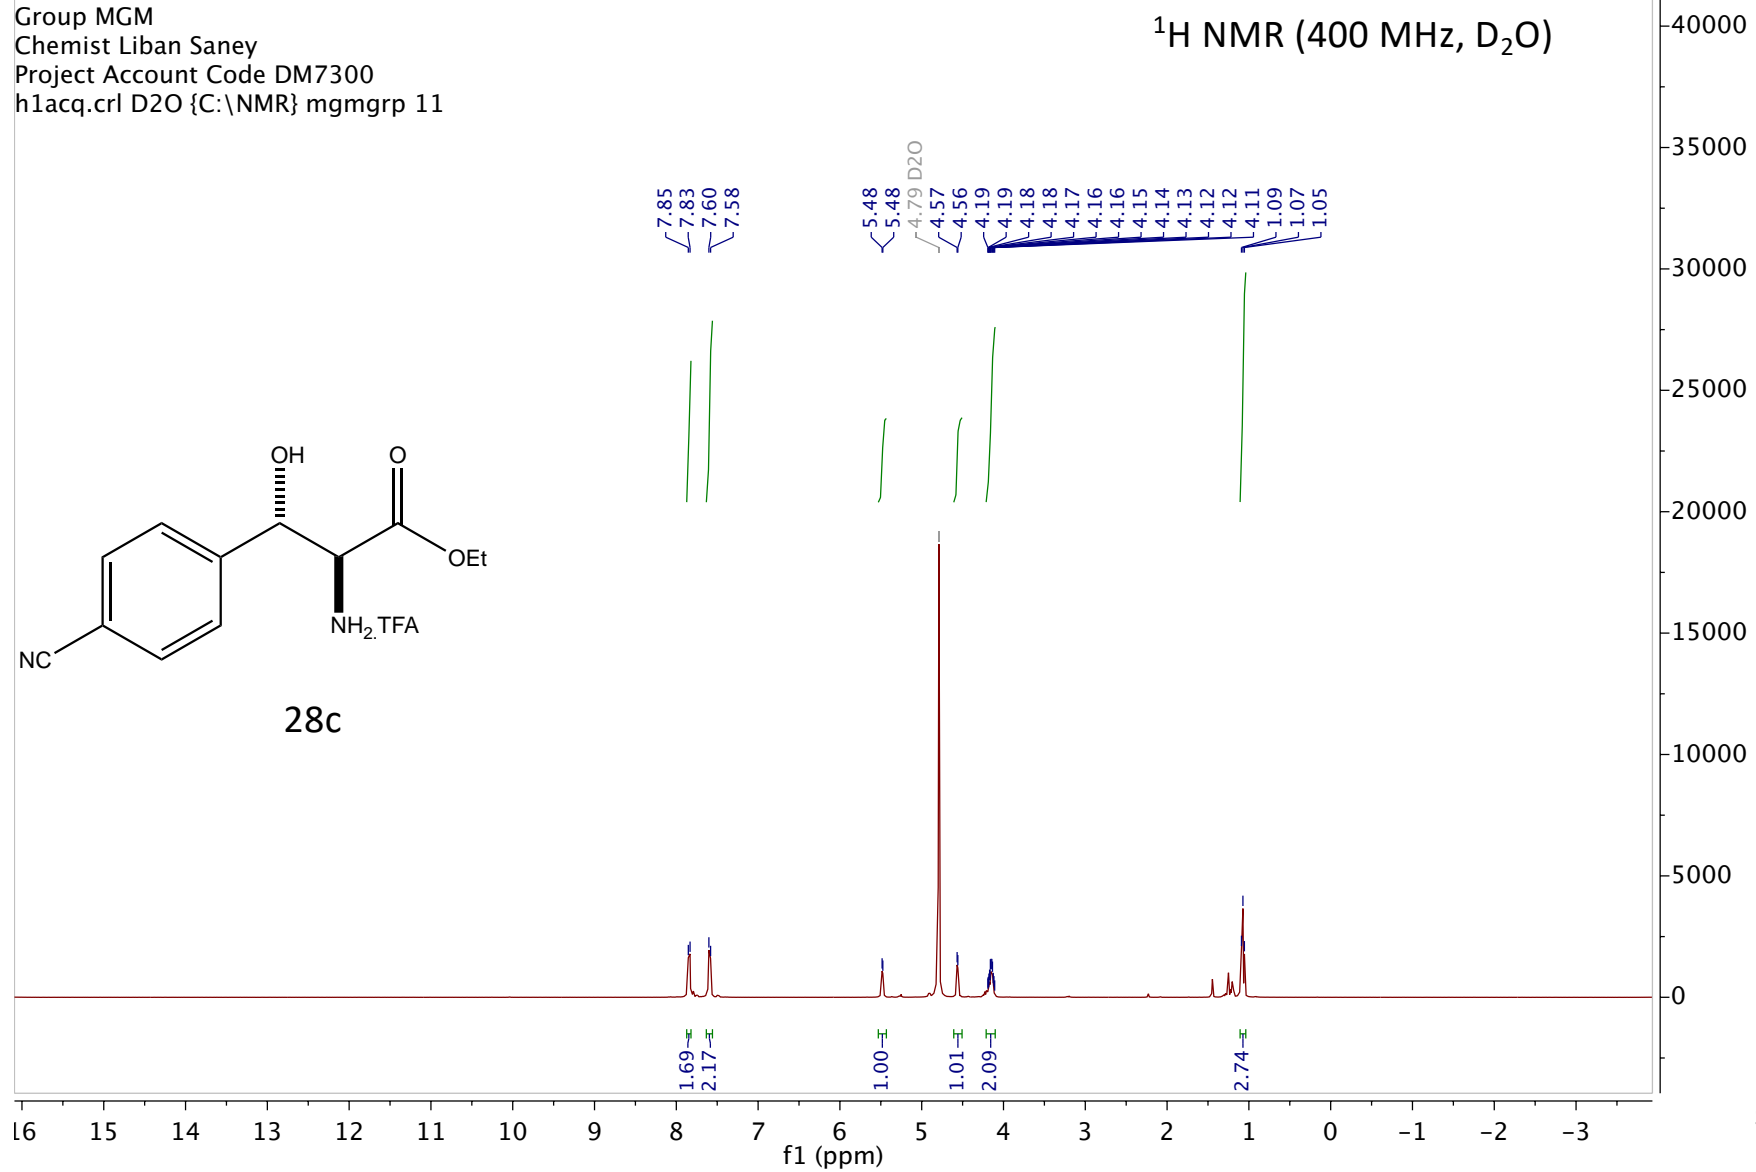

Jan18-2021-11-LS907(C).4.fid  
Instrument AVH400  
Group MGM  
Chemist Liban Saney  
Project Account Code DM7300  
c13acq\_512.crl D2O {C:\NMR} mgmgrp 11

$^{13}\text{C}$  NMR (101 MHz,  $\text{D}_2\text{O}$ )

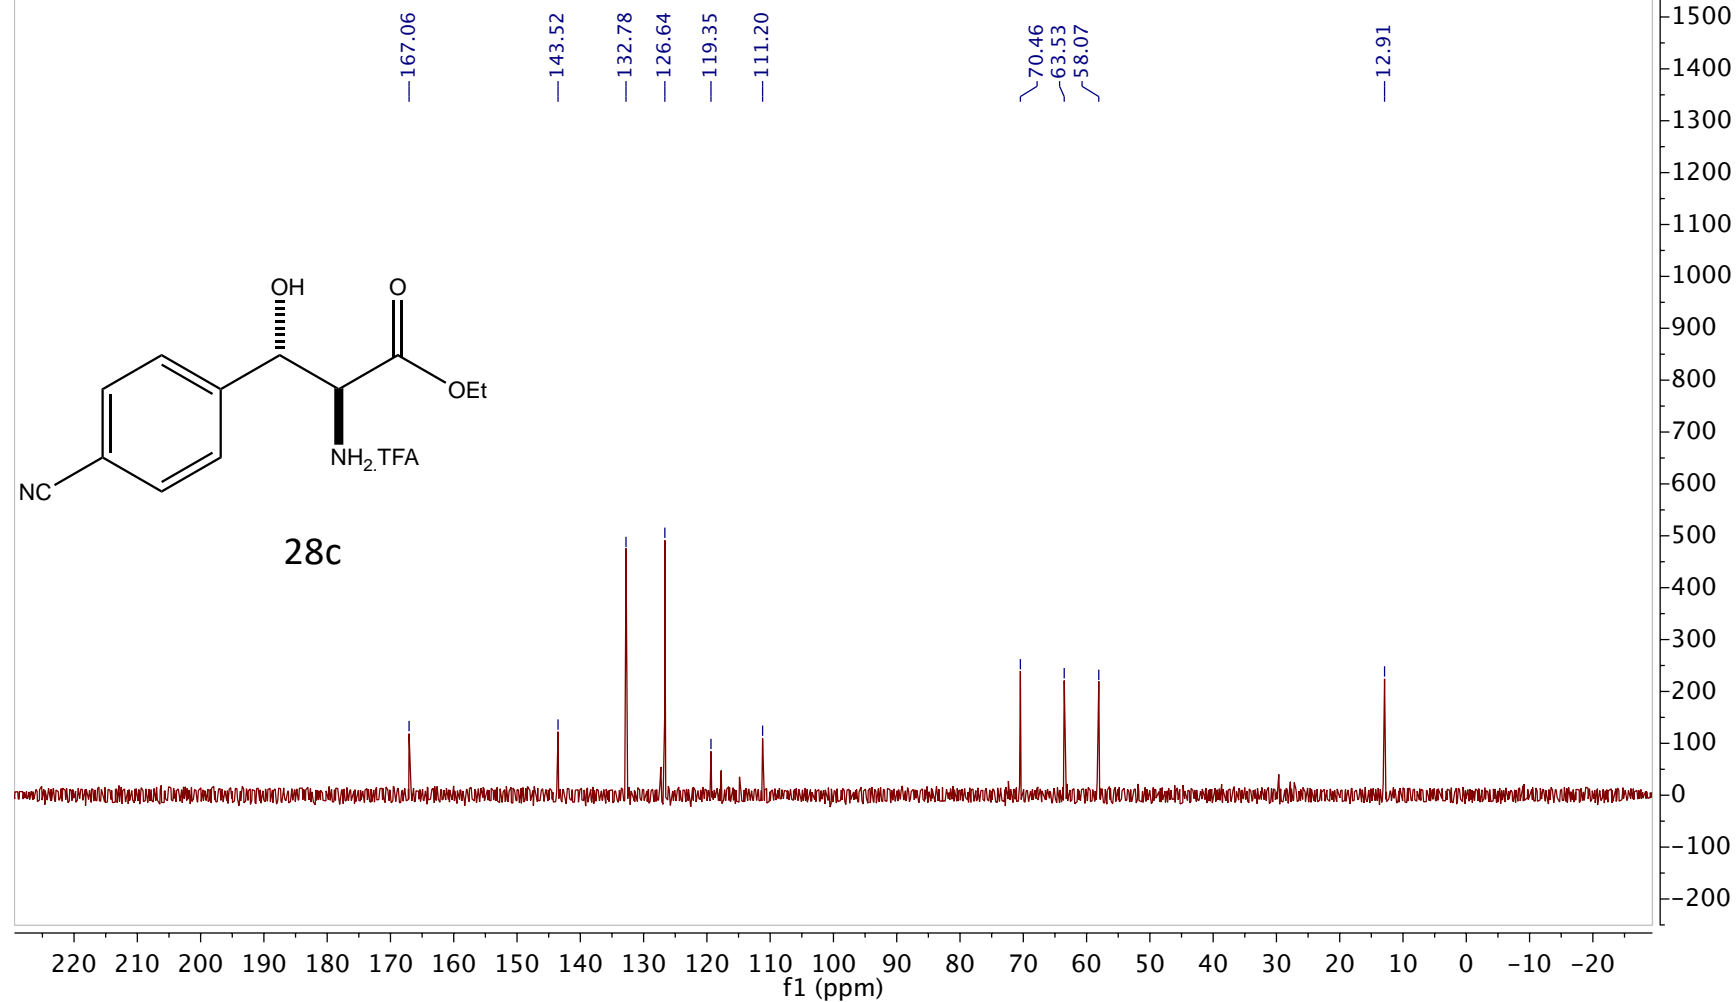

Jan19-2021-26-LS914(C).1.fid  
Instrument AVH400  
Group MGM  
Chemist Liban Saney  
Project Account Code DM7300  
h1acq.crl D2O {C:\NMR} mgmgrp 26

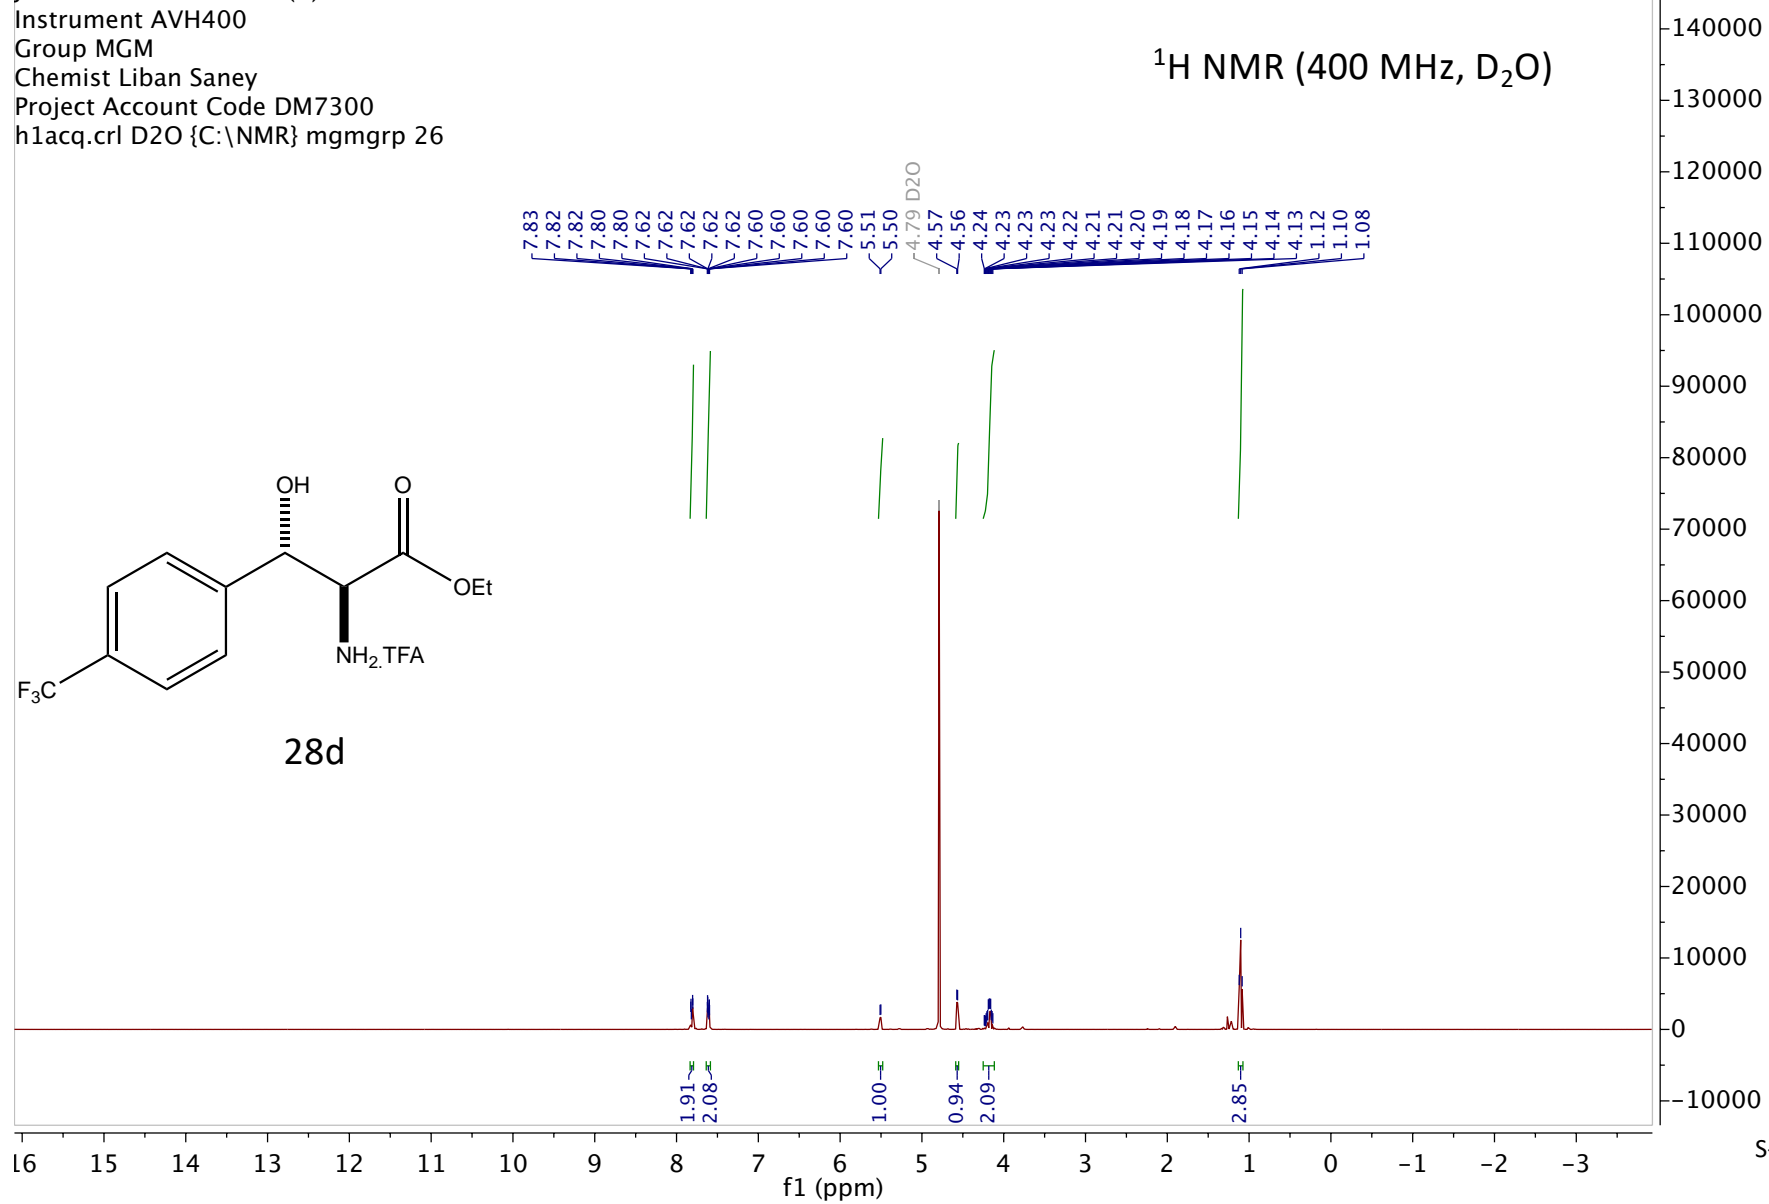

Jan19-2021-26-LS914(C).4.fid  
Instrument AVH400  
Group MGM  
Chemist Liban Saney  
Project Account Code DM7300  
c13acq\_512.crl D2O {C:\NMR} mgmgrp 26

$^{13}\text{C}$  NMR (101 MHz,  $\text{D}_2\text{O}$ )

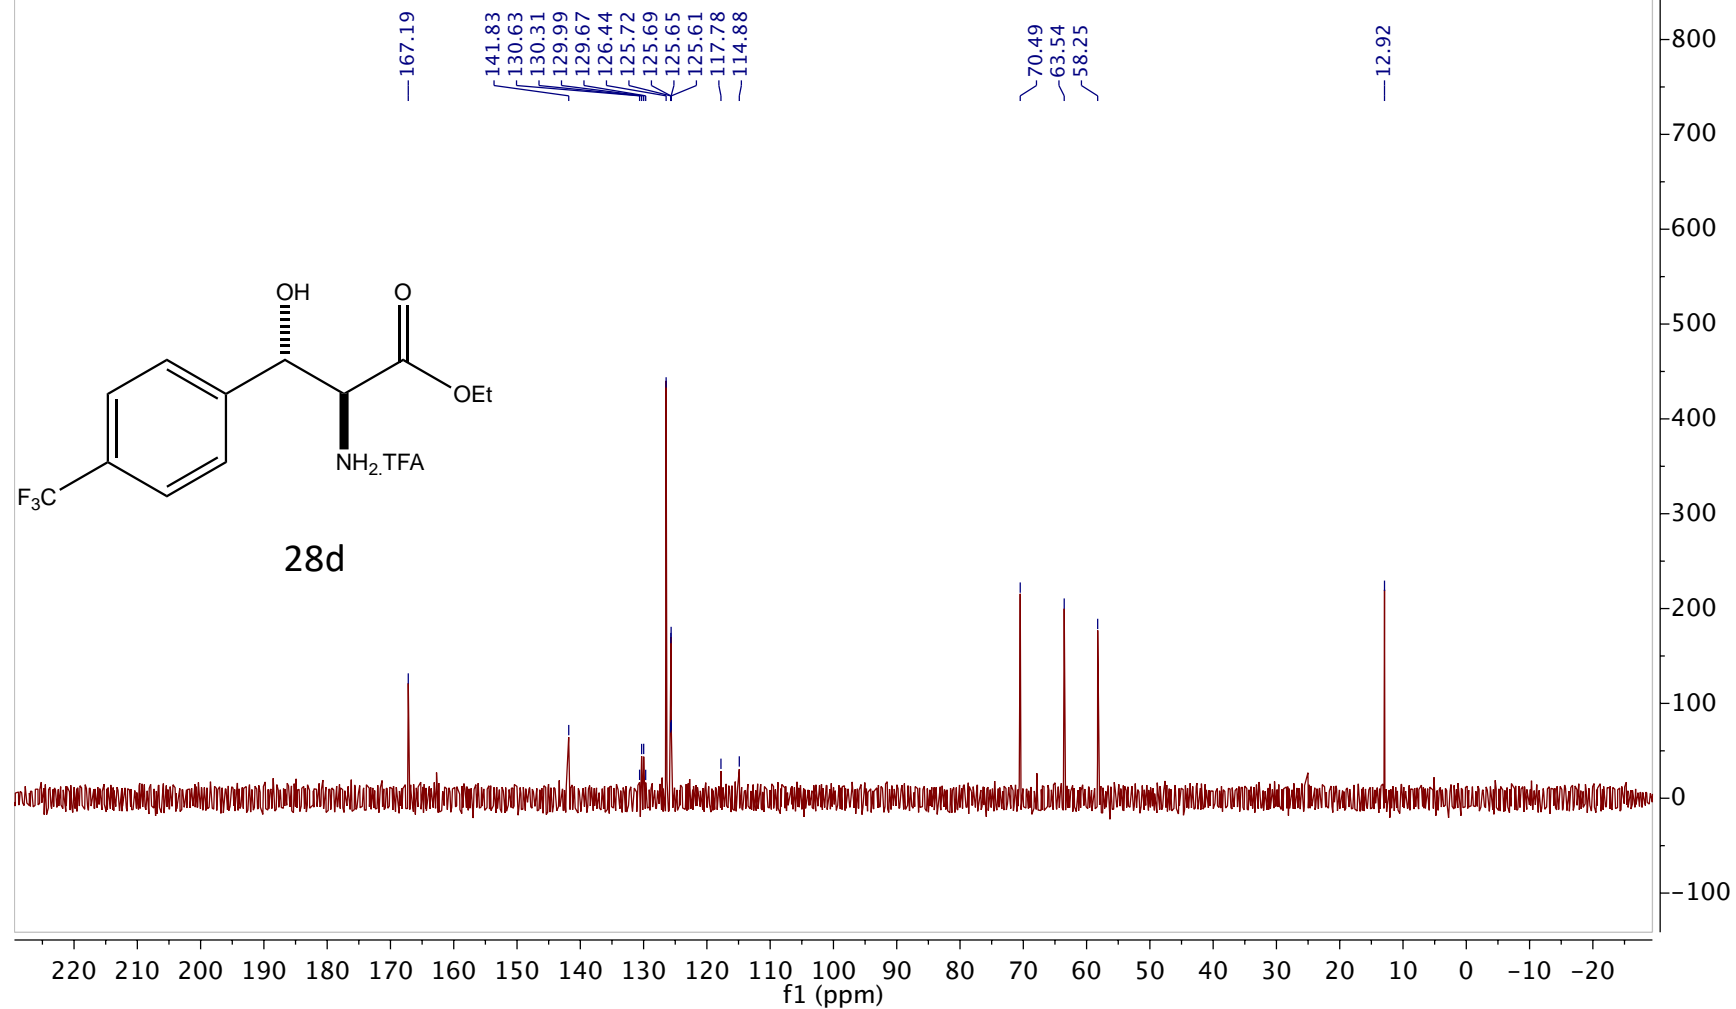

Jan19-2021-26-LS914(C).6.fid  
Instrument AVH400  
Group MGM  
Chemist Liban Saney  
Project Account Code DM7300  
f19dec\_256.crl D2O {C:\NMR} mgmgrp 26

$^{19}\text{F}$  NMR (376 MHz,  $\text{D}_2\text{O}$ )

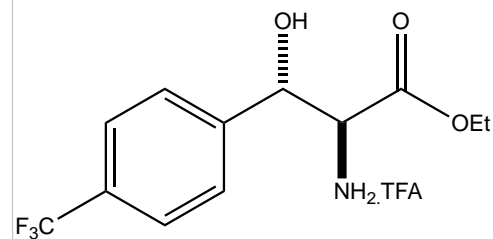

28d

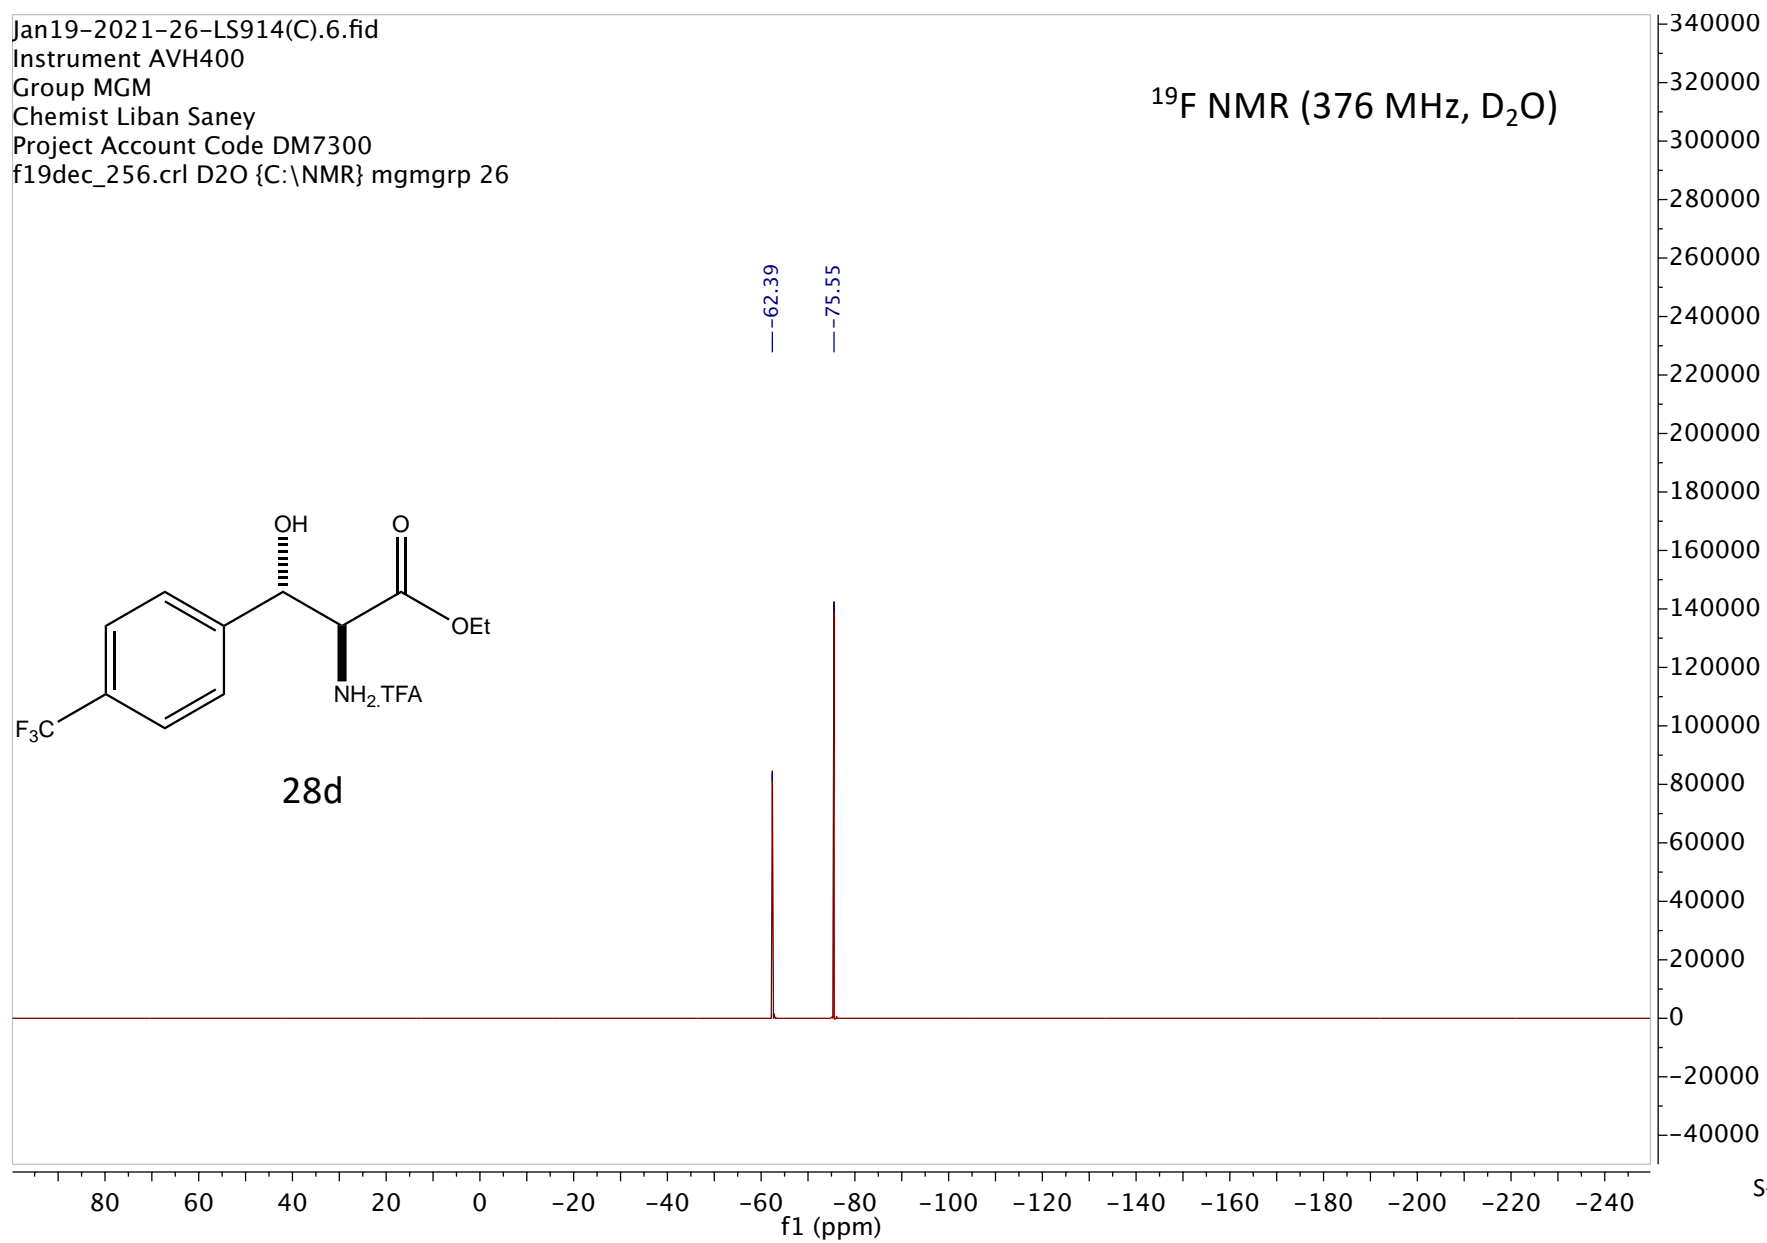

Jan18-2021-13-LS909(C).1.fid  
Instrument AVH400  
Group MGM  
Chemist Liban Saney  
Project Account Code DM7300  
h1acq.crl D2O {C:\NMR} mgmgrp 13

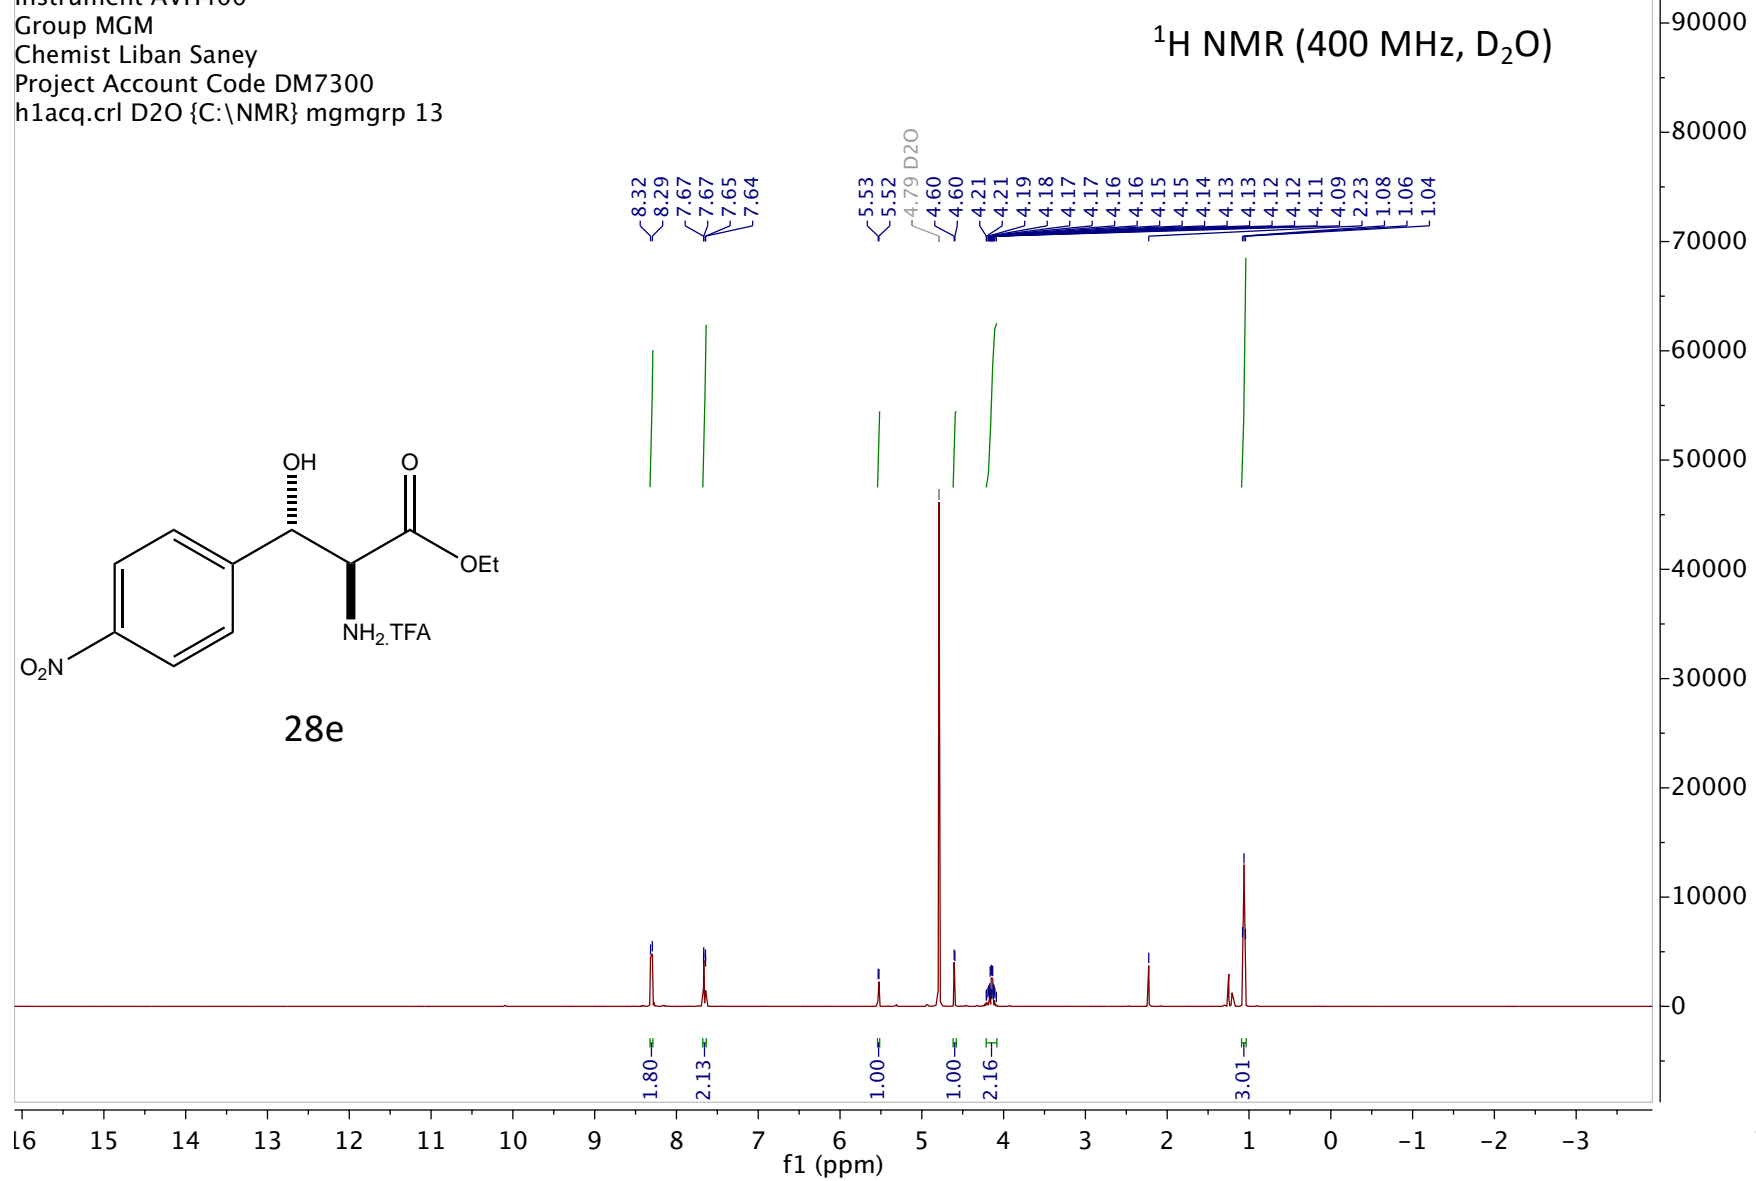



Jan18-2021-13-LS909(C).4.fid  
Instrument AVH400  
Group MGM  
Chemist Liban Saney  
Project Account Code DM7300  
c13acq\_512.crl D2O {C:\NMR} mgmgrp 13

$^{13}\text{C}$  NMR (101 MHz,  $\text{D}_2\text{O}$ )

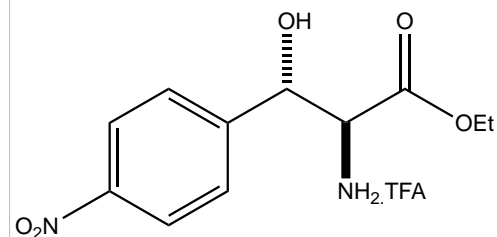

28e

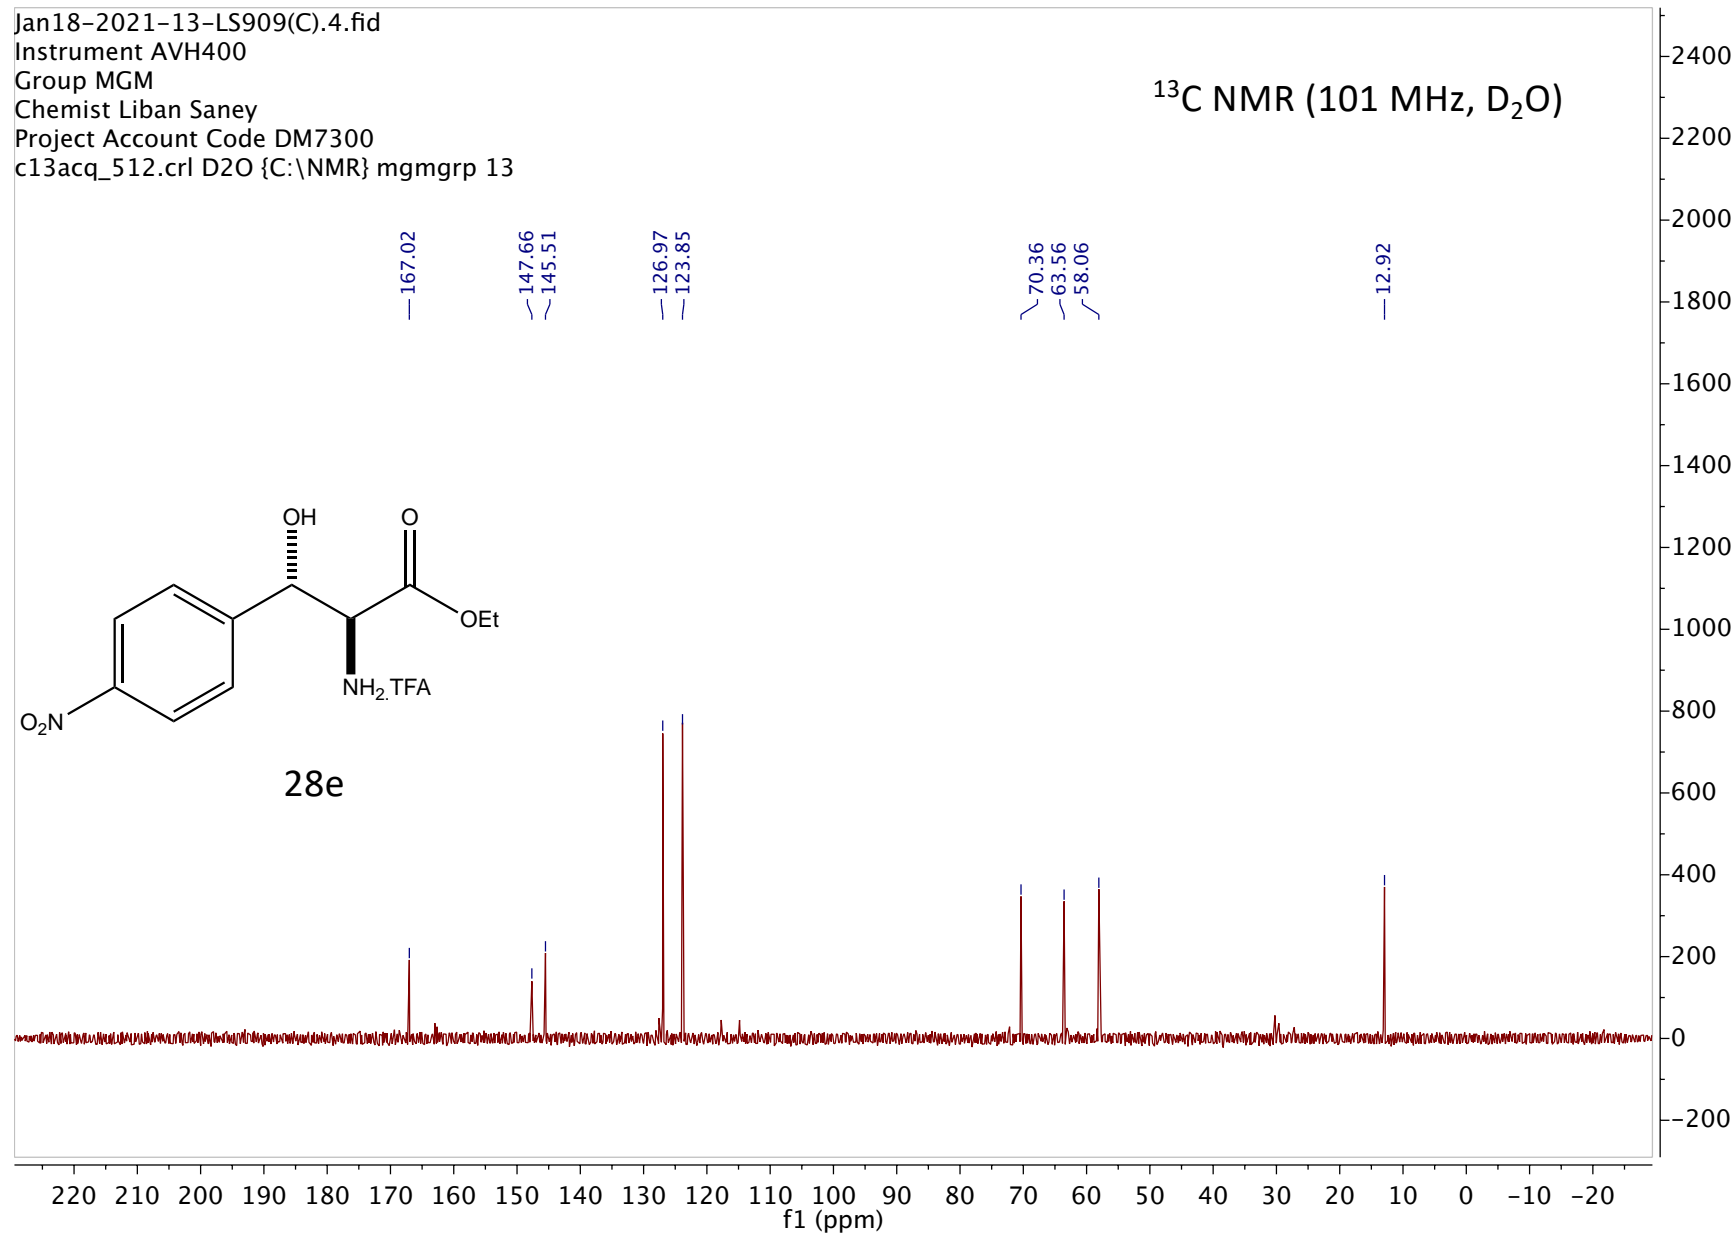

Jan19-2021-29-LS917(C).1.fid  
Instrument AVH400  
Group MGM  
Chemist Liban Saney  
Project Account Code DM7300  
h1acq.crl D2O {C:\NMR} mgmgrp 29

<sup>1</sup>H NMR (400 MHz, D<sub>2</sub>O)

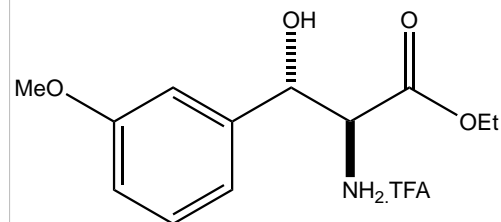

28f

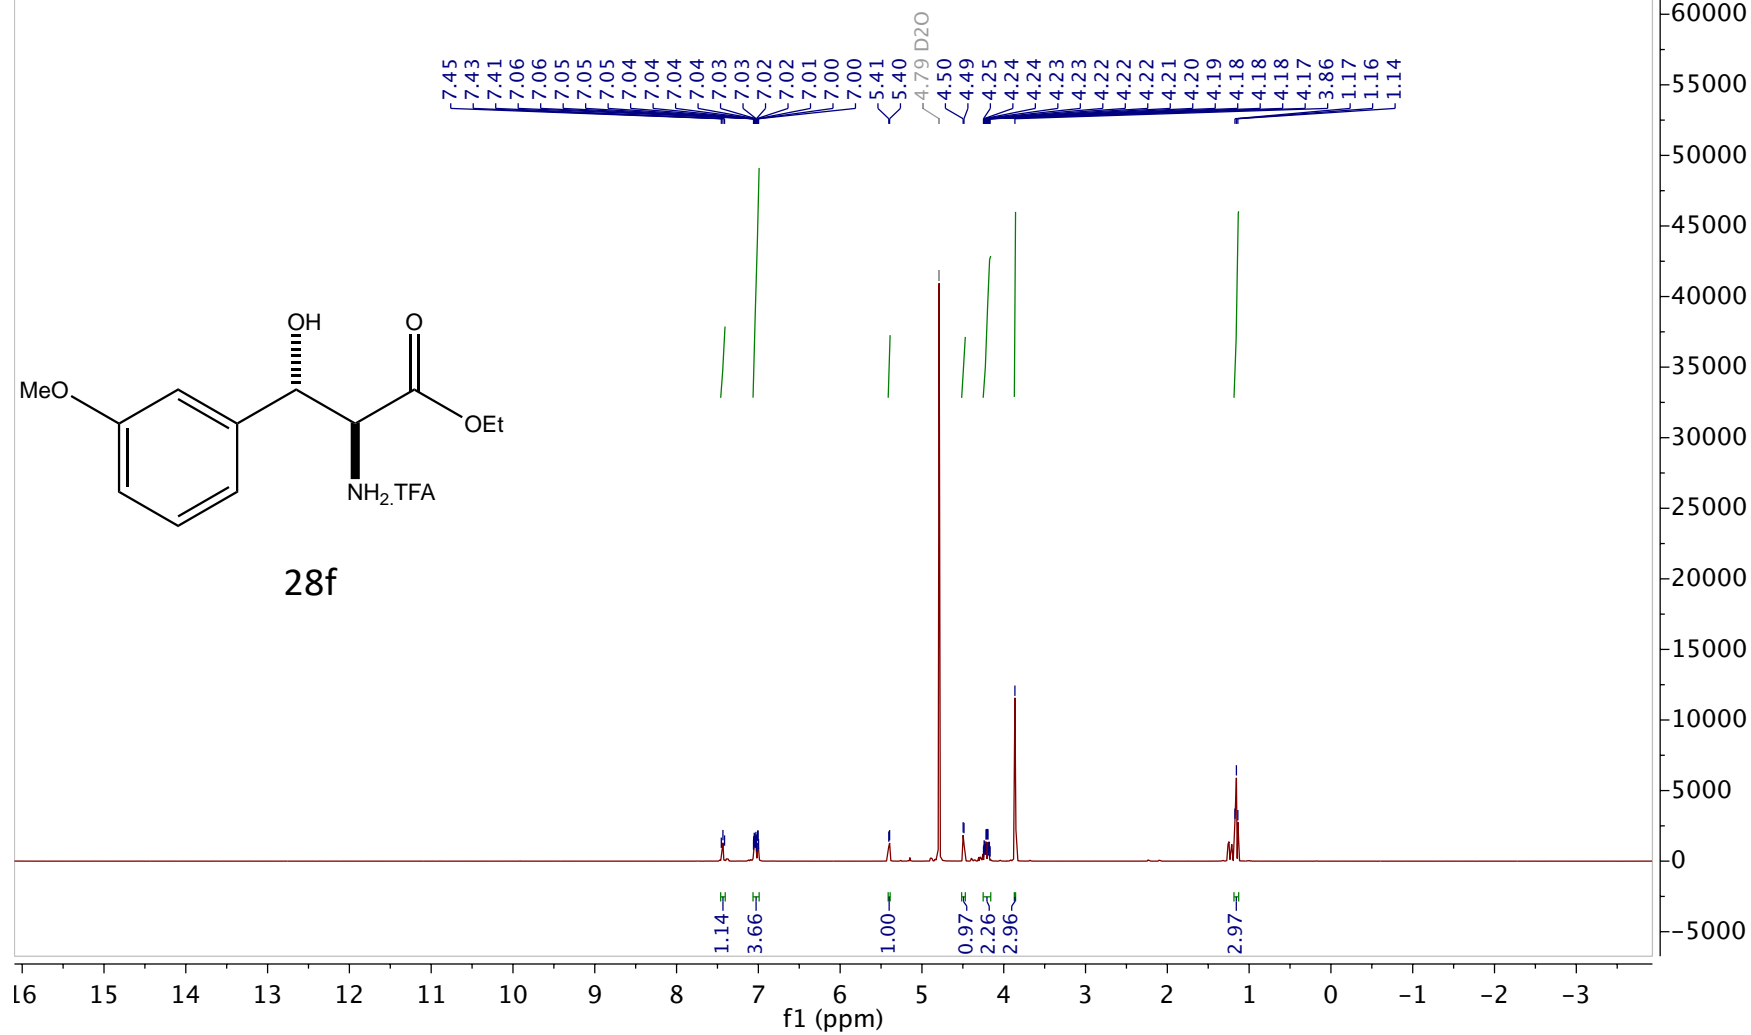

Jan19-2021-29-LS917(C).4.fid  
Instrument AVH400  
Group MGM  
Chemist Liban Saney  
Project Account Code DM7300  
c13acq\_512.crl D2O {C:\NMR} mgmgrp 29

$^{13}\text{C}$  NMR (101 MHz,  $\text{D}_2\text{O}$ )



28f

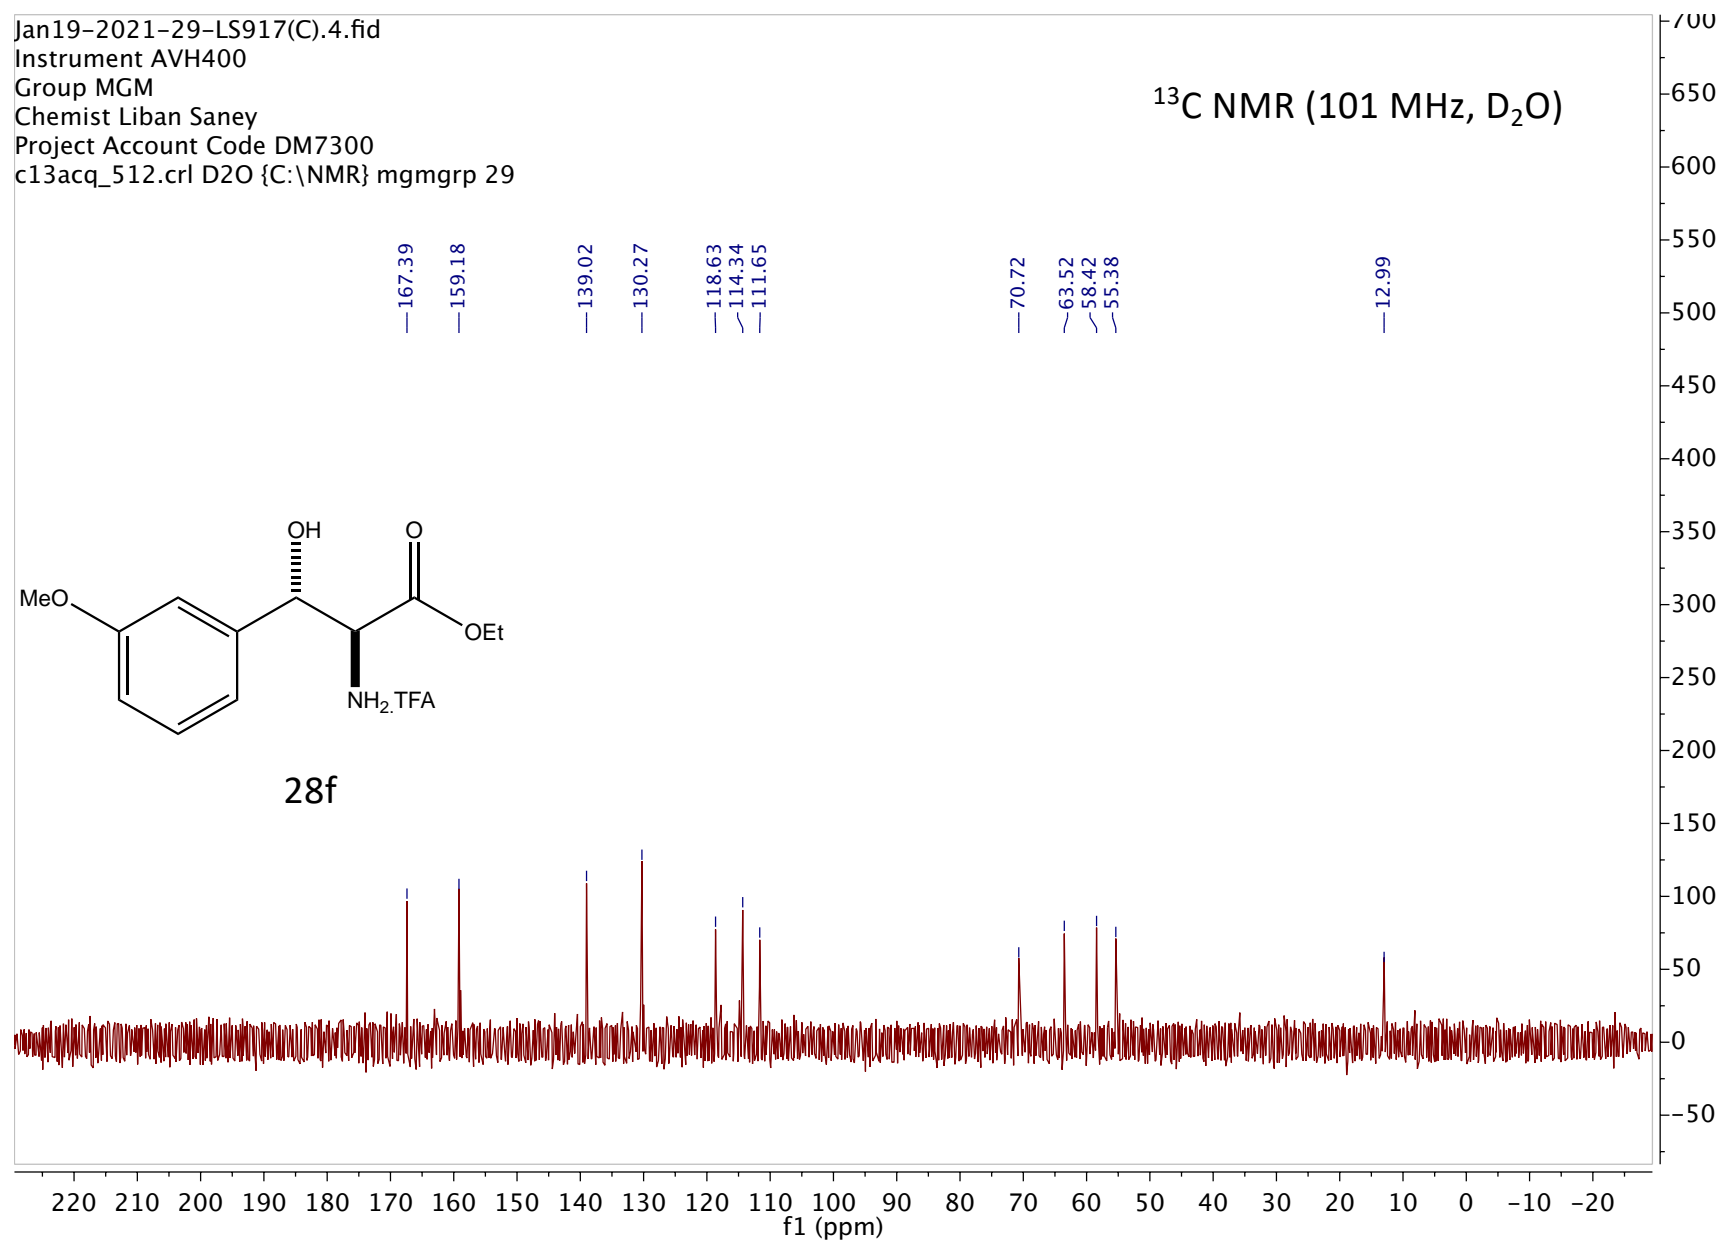

Jan19-2021-32-LS919(C).1.fid  
Instrument AVH400  
Group MGM  
Chemist Liban Saney  
Project Account Code DM7300  
h1acq.crl D2O {C:\NMR} mgmgrp 32

<sup>1</sup>H NMR (400 MHz, D<sub>2</sub>O)

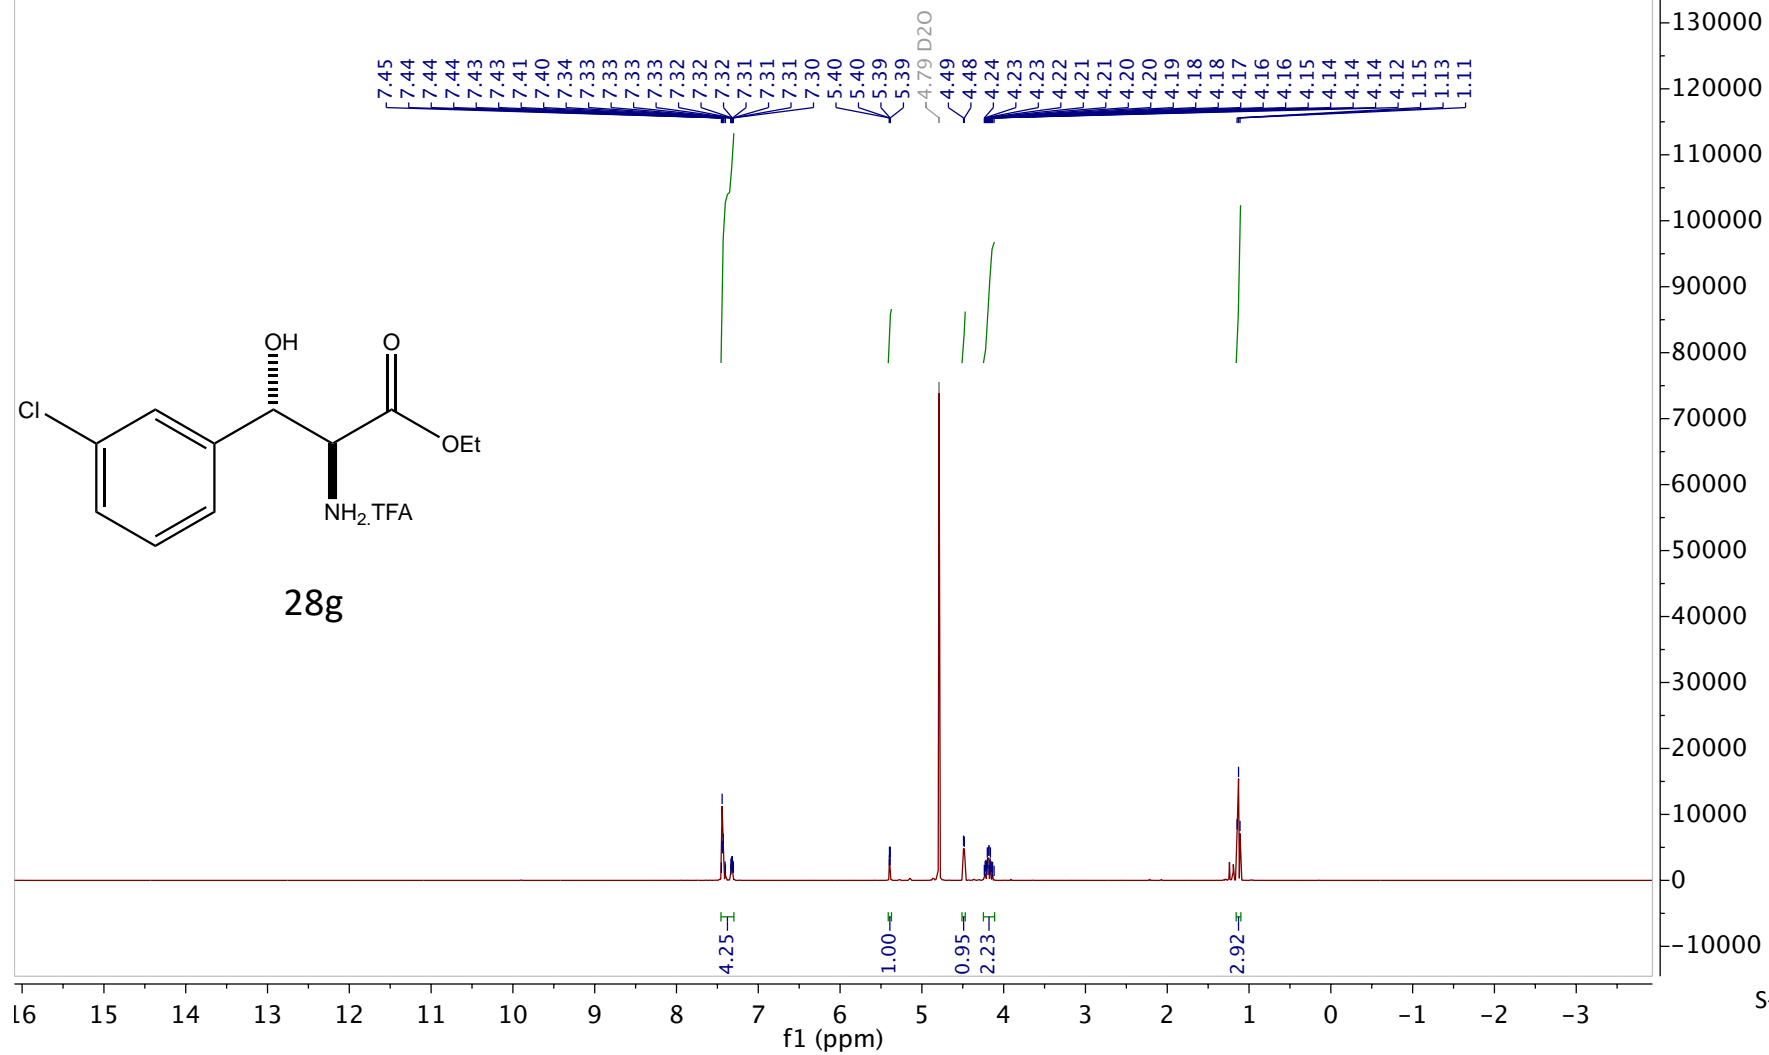

Jan19-2021-32-LS919(C).4.fid  
Instrument AVH400  
Group MGM  
Chemist Liban Saney  
Project Account Code DM7300  
c13acq\_512.crl D2O {C:\NMR} mgmgrp 32

$^{13}\text{C}$  NMR (101 MHz,  $\text{D}_2\text{O}$ )

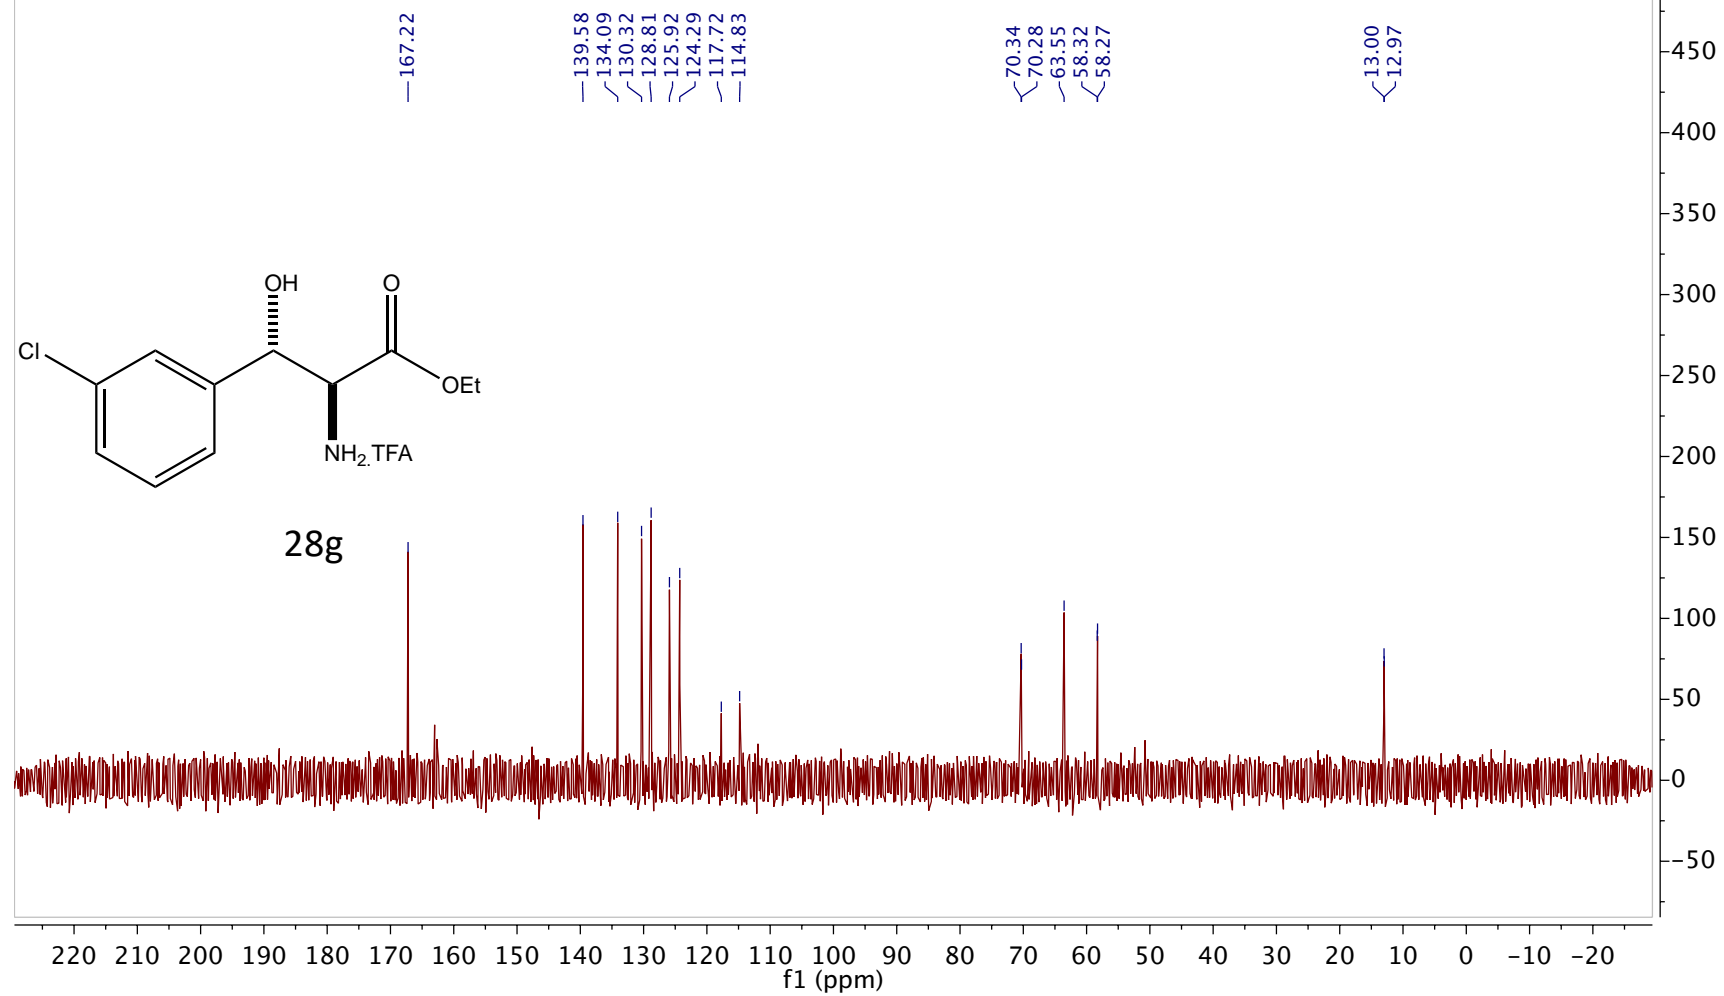

Feb08-2021-51-LS951(C).1.fid  
Instrument AVH400  
Group MGM  
Chemist Liban Saney  
Project Account Code DM7300  
h1acq.crl D2O {C:\NMR} mgmgrp 51

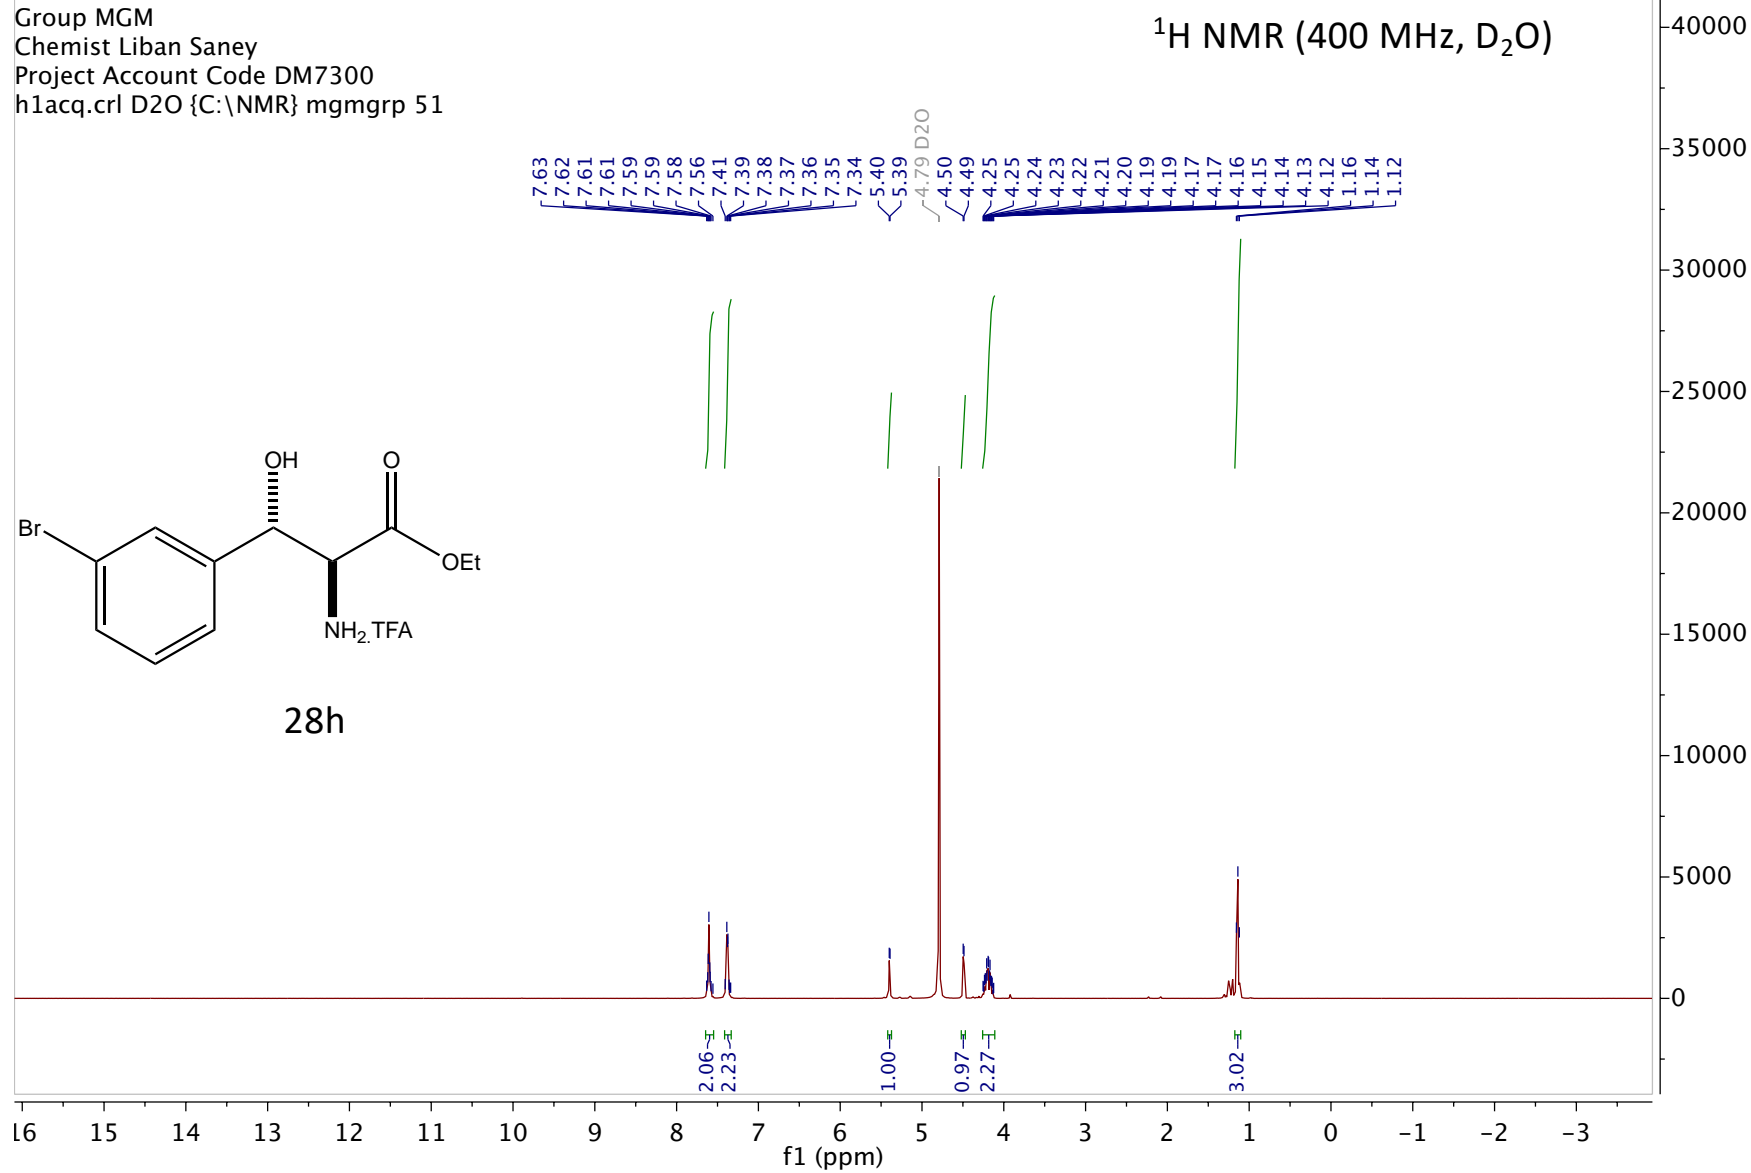

Feb08-2021-51-LS951(C).4.fid  
Instrument AVH400  
Group MGM  
Chemist Liban Saney  
Project Account Code DM7300  
c13acq\_512.crl D2O {C:\NMR} mgmgrp 51

$^{13}\text{C}$  NMR (101 MHz,  $\text{D}_2\text{O}$ )

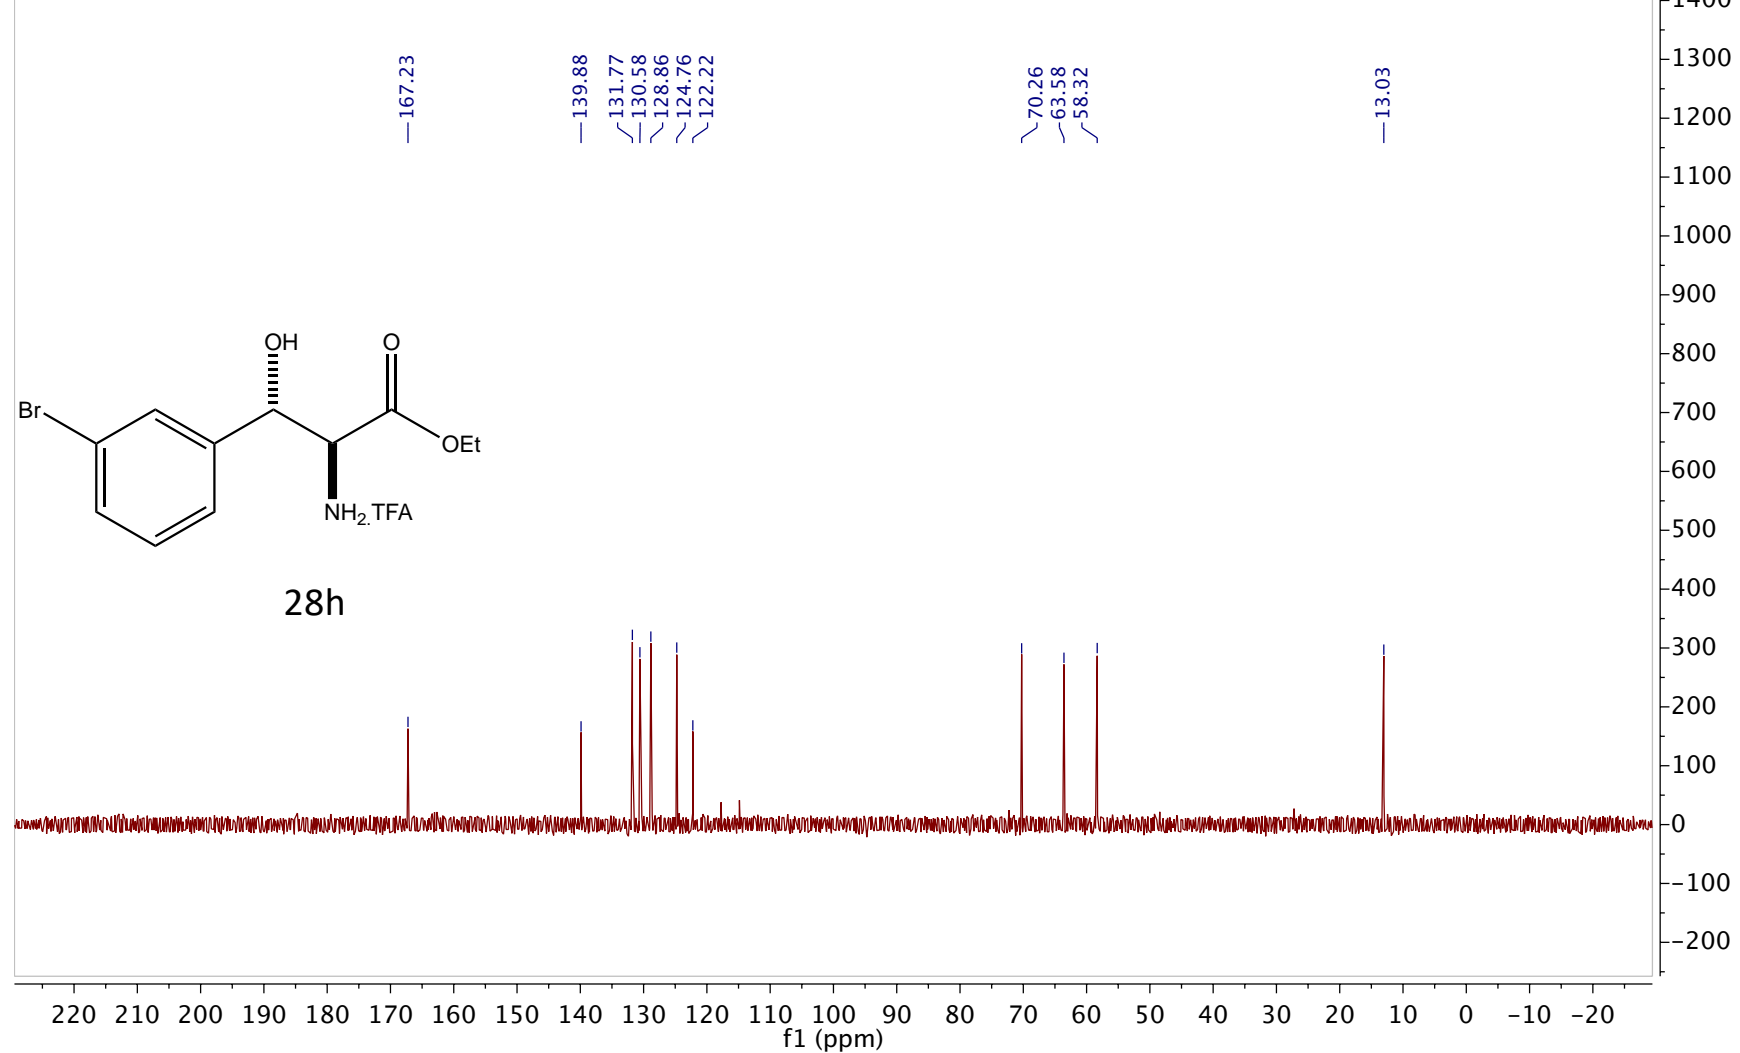

Jan19-2021-27-LS915(C).1.fid  
Instrument AVH400  
Group MGM  
Chemist Liban Saney  
Project Account Code DM7300  
h1acq.crl D2O {C:\NMR} mgmgrp 27

<sup>1</sup>H NMR (400 MHz, D<sub>2</sub>O)

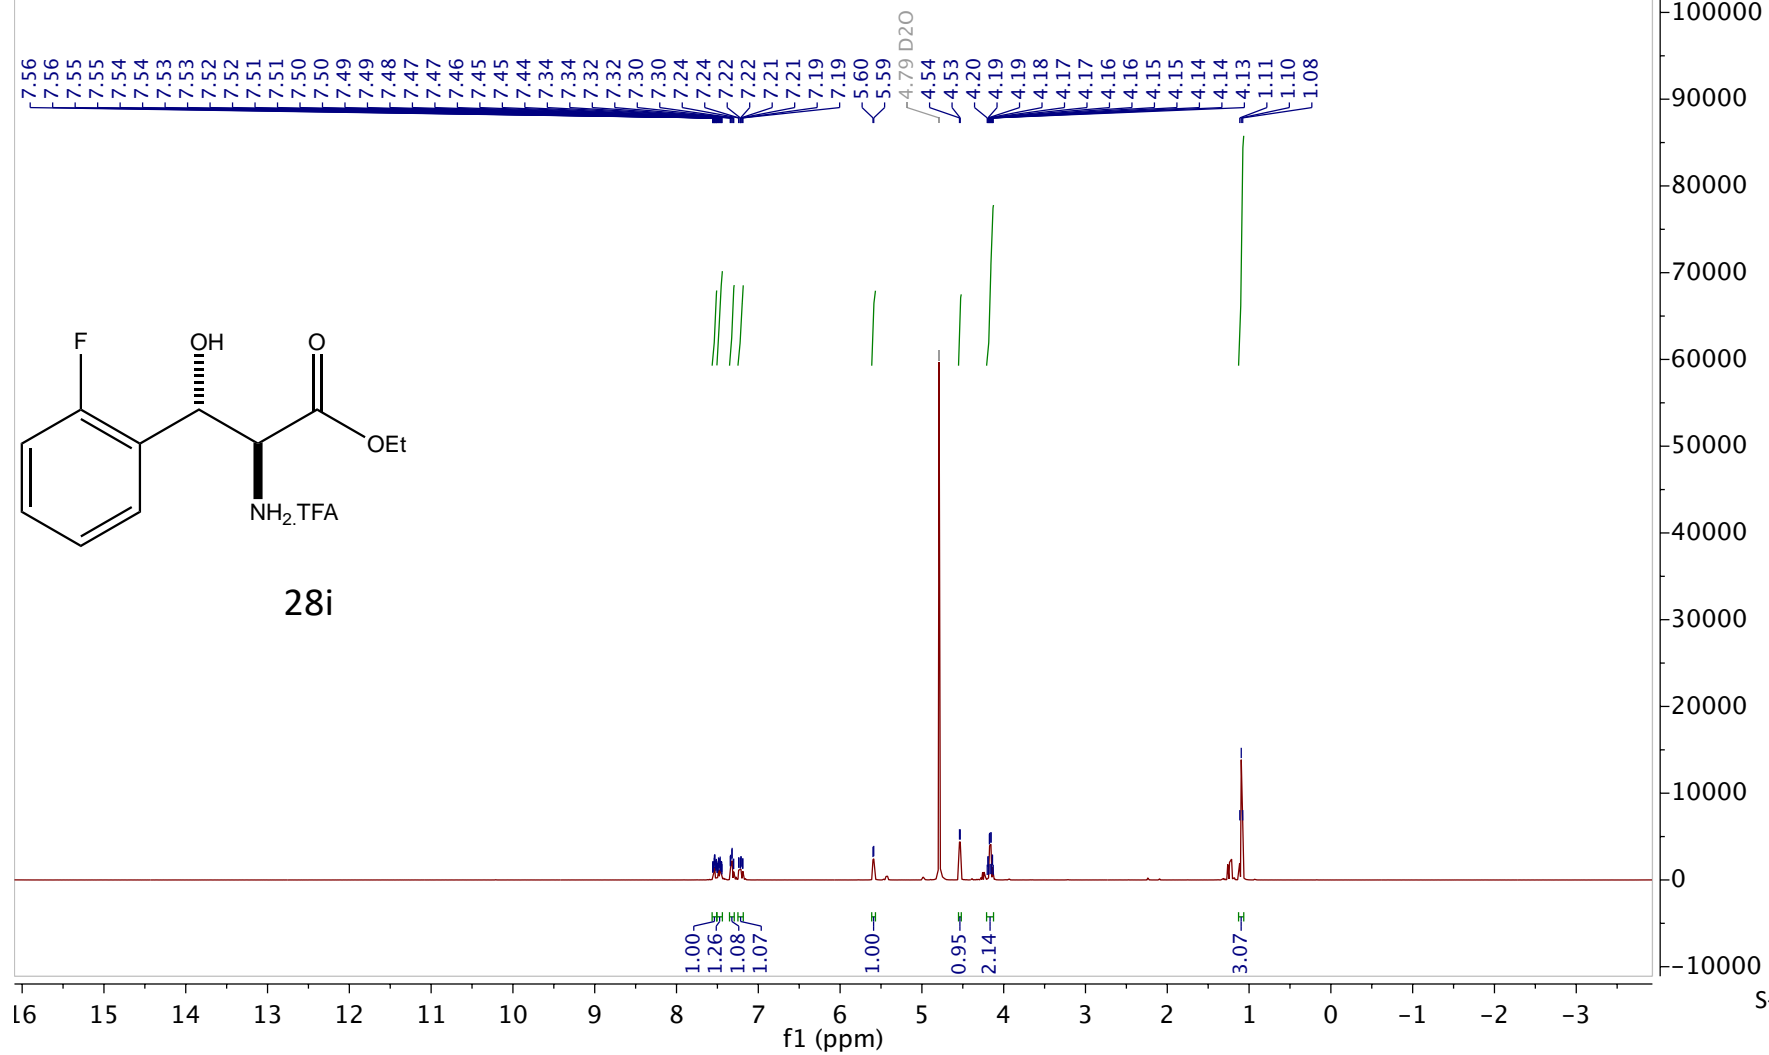



Jan19-2021-27-LS915(C).4.fid  
Instrument AVH400  
Group MGM  
Chemist Liban Saney  
Project Account Code DM7300  
c13acq\_512.crl D2O {C:\NMR} mgmgrp 27

<sup>13</sup>C NMR (101 MHz, D<sub>2</sub>O)

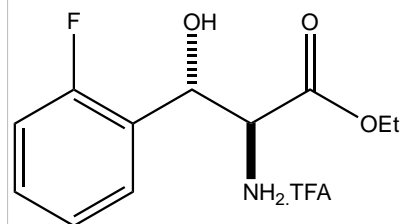

28i

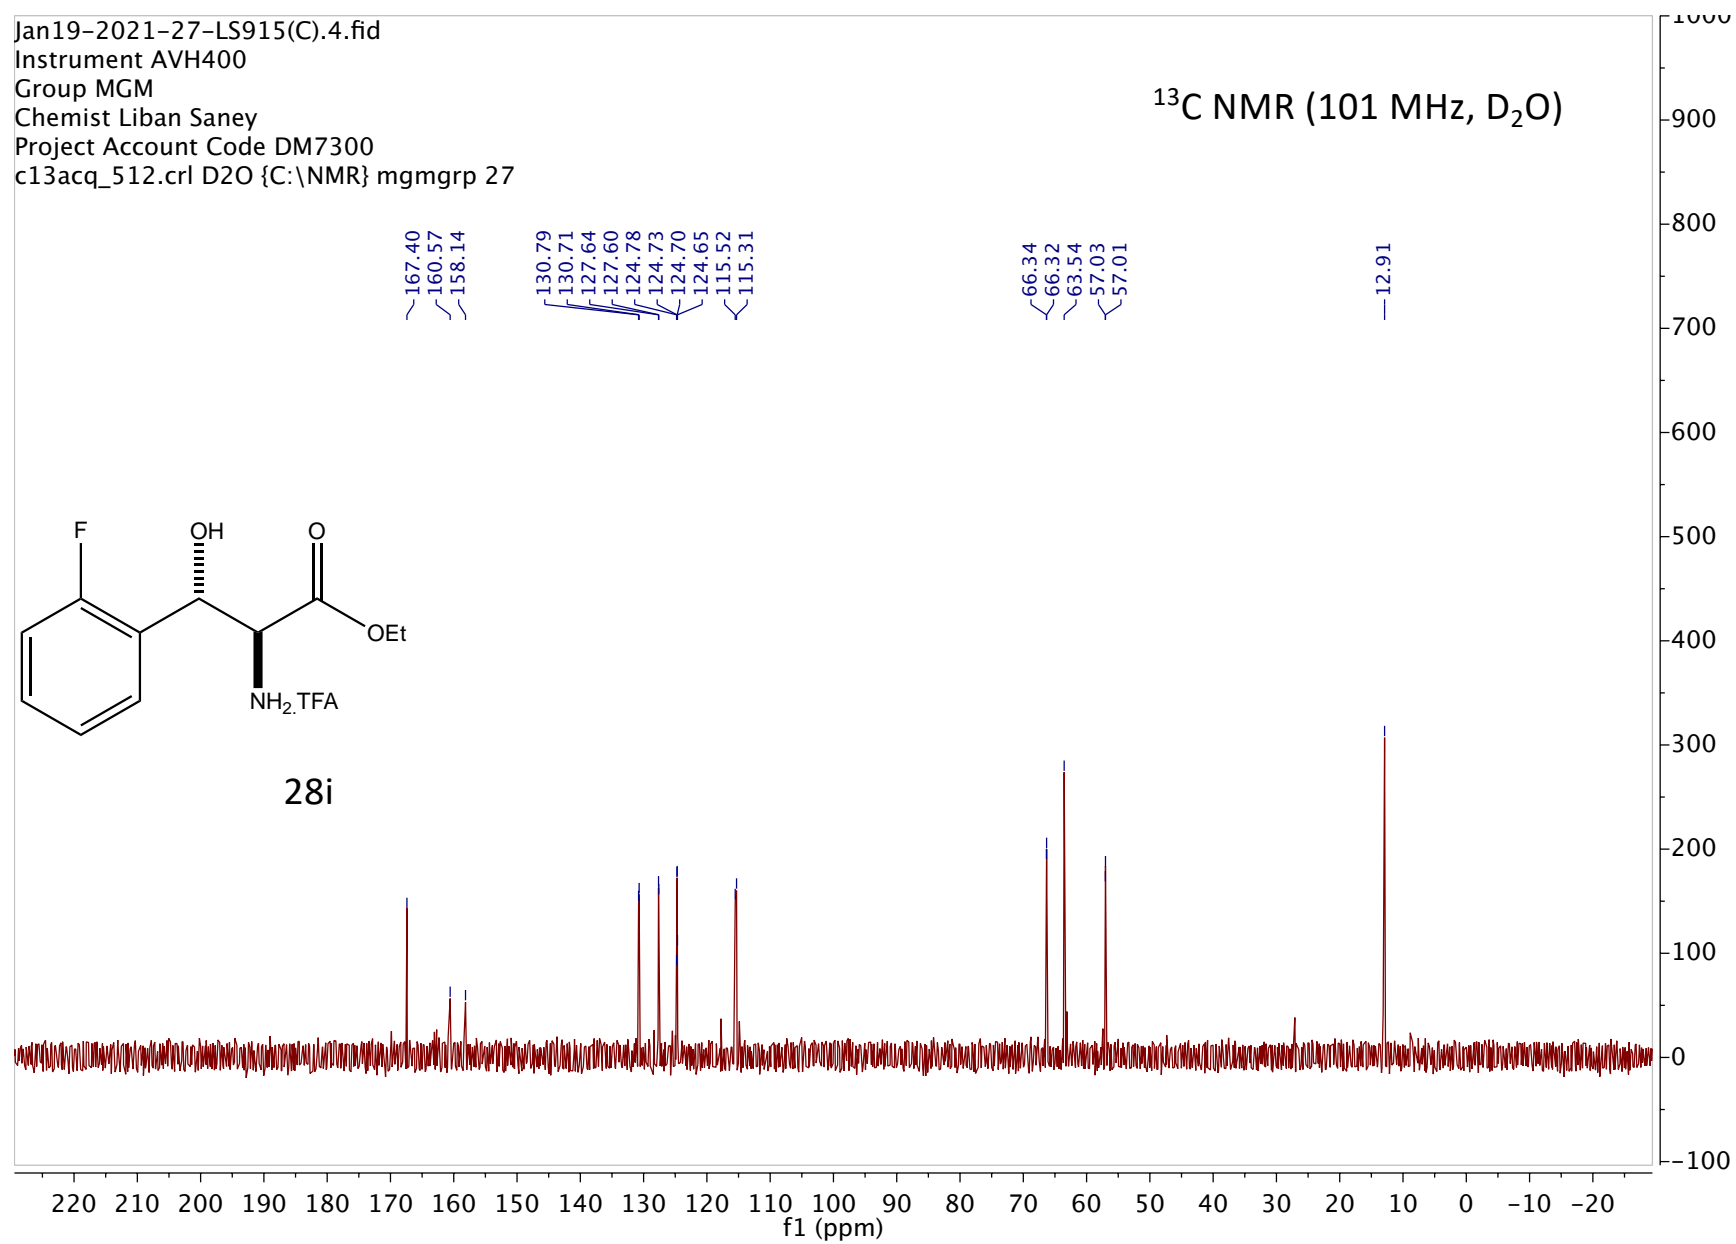

Jan19-2021-27-LS915(C).6.fid  
Instrument AVH400  
Group MGM  
Chemist Liban Saney  
Project Account Code DM7300  
f19dec\_256.crl D2O {C:\NMR} mgmgrp 27

<sup>19</sup>F NMR (376 MHz, D<sub>2</sub>O)



28i

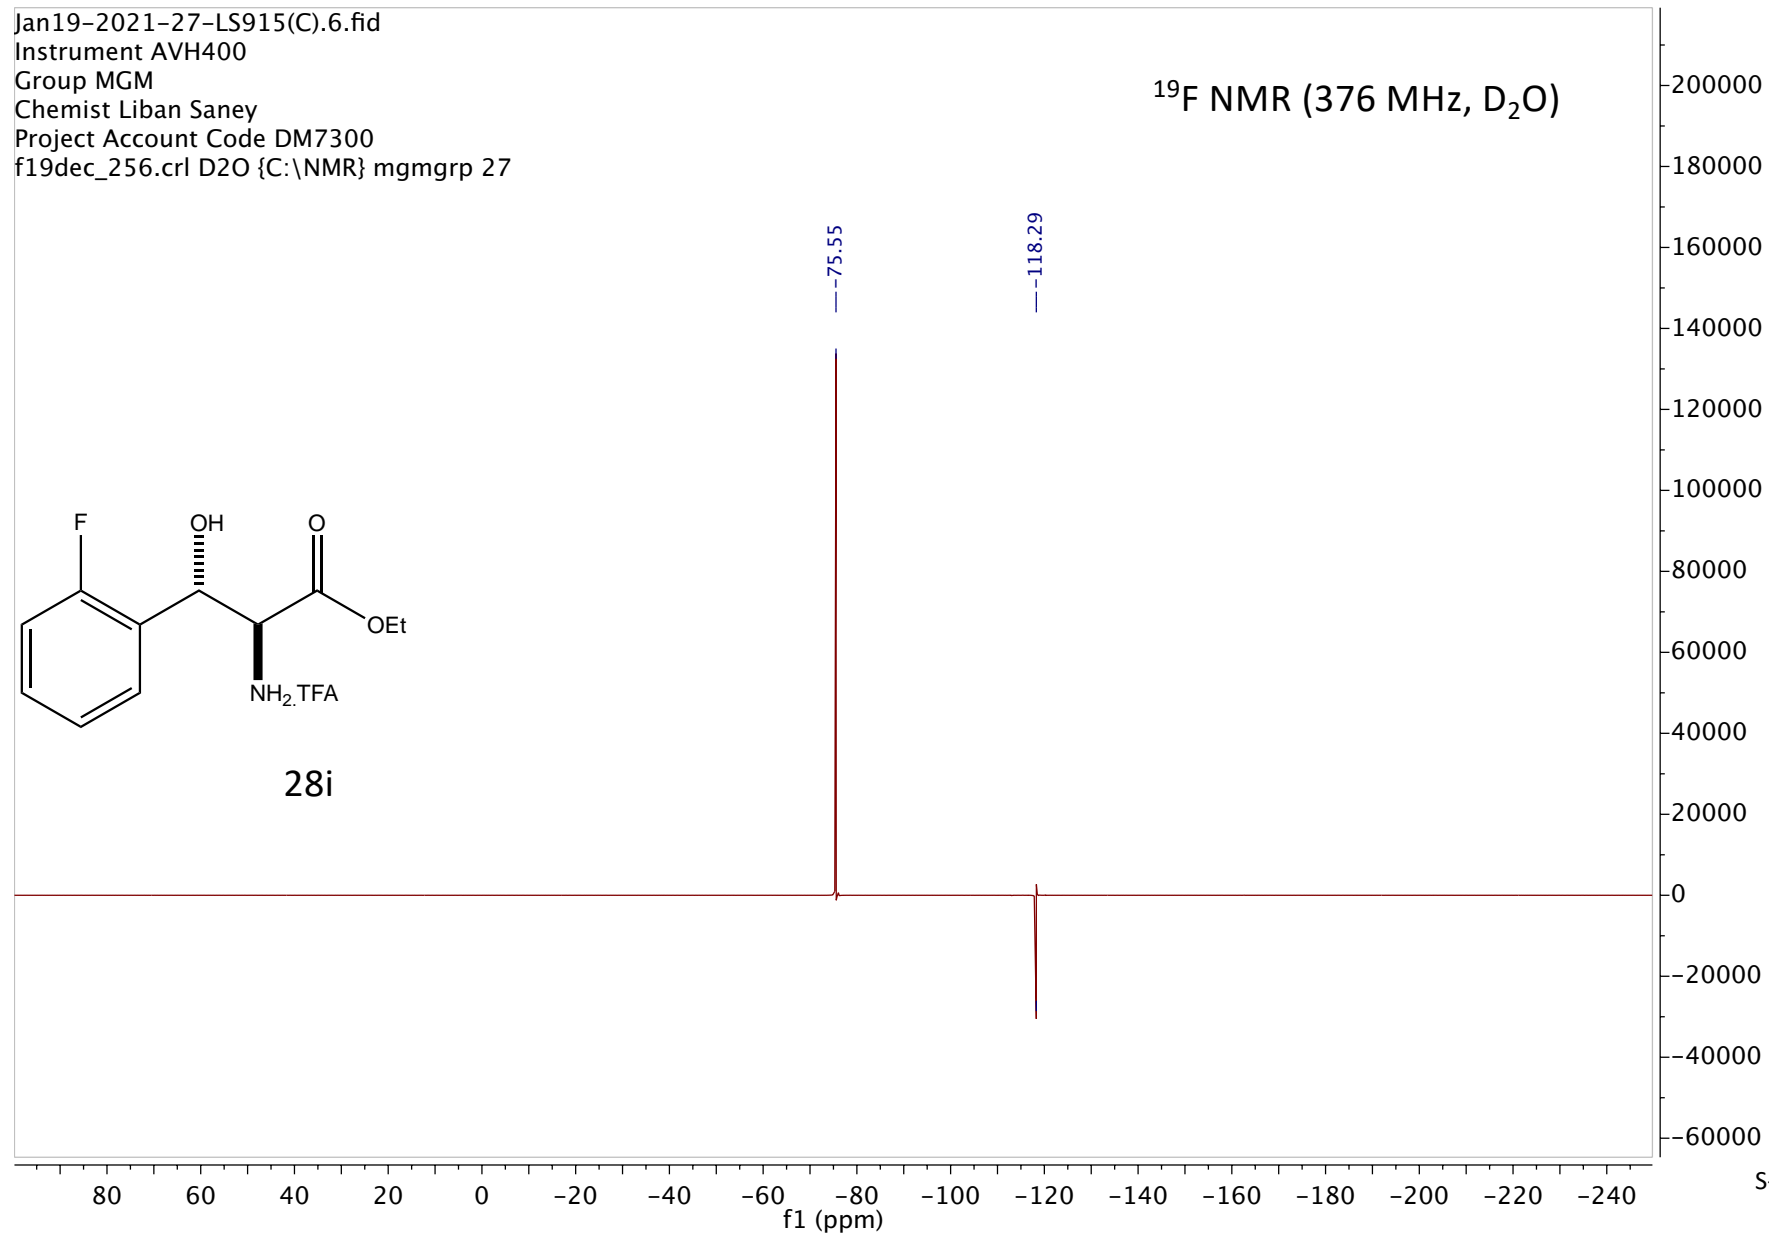

Feb08-2021-50-LS950(C).1.fid  
Instrument AVH400  
Group MGM  
Chemist Liban Saney  
Project Account Code DM7300  
h1acq.crl D2O {C:\NMR} mgmgrp 50

<sup>1</sup>H NMR (400 MHz, D<sub>2</sub>O)

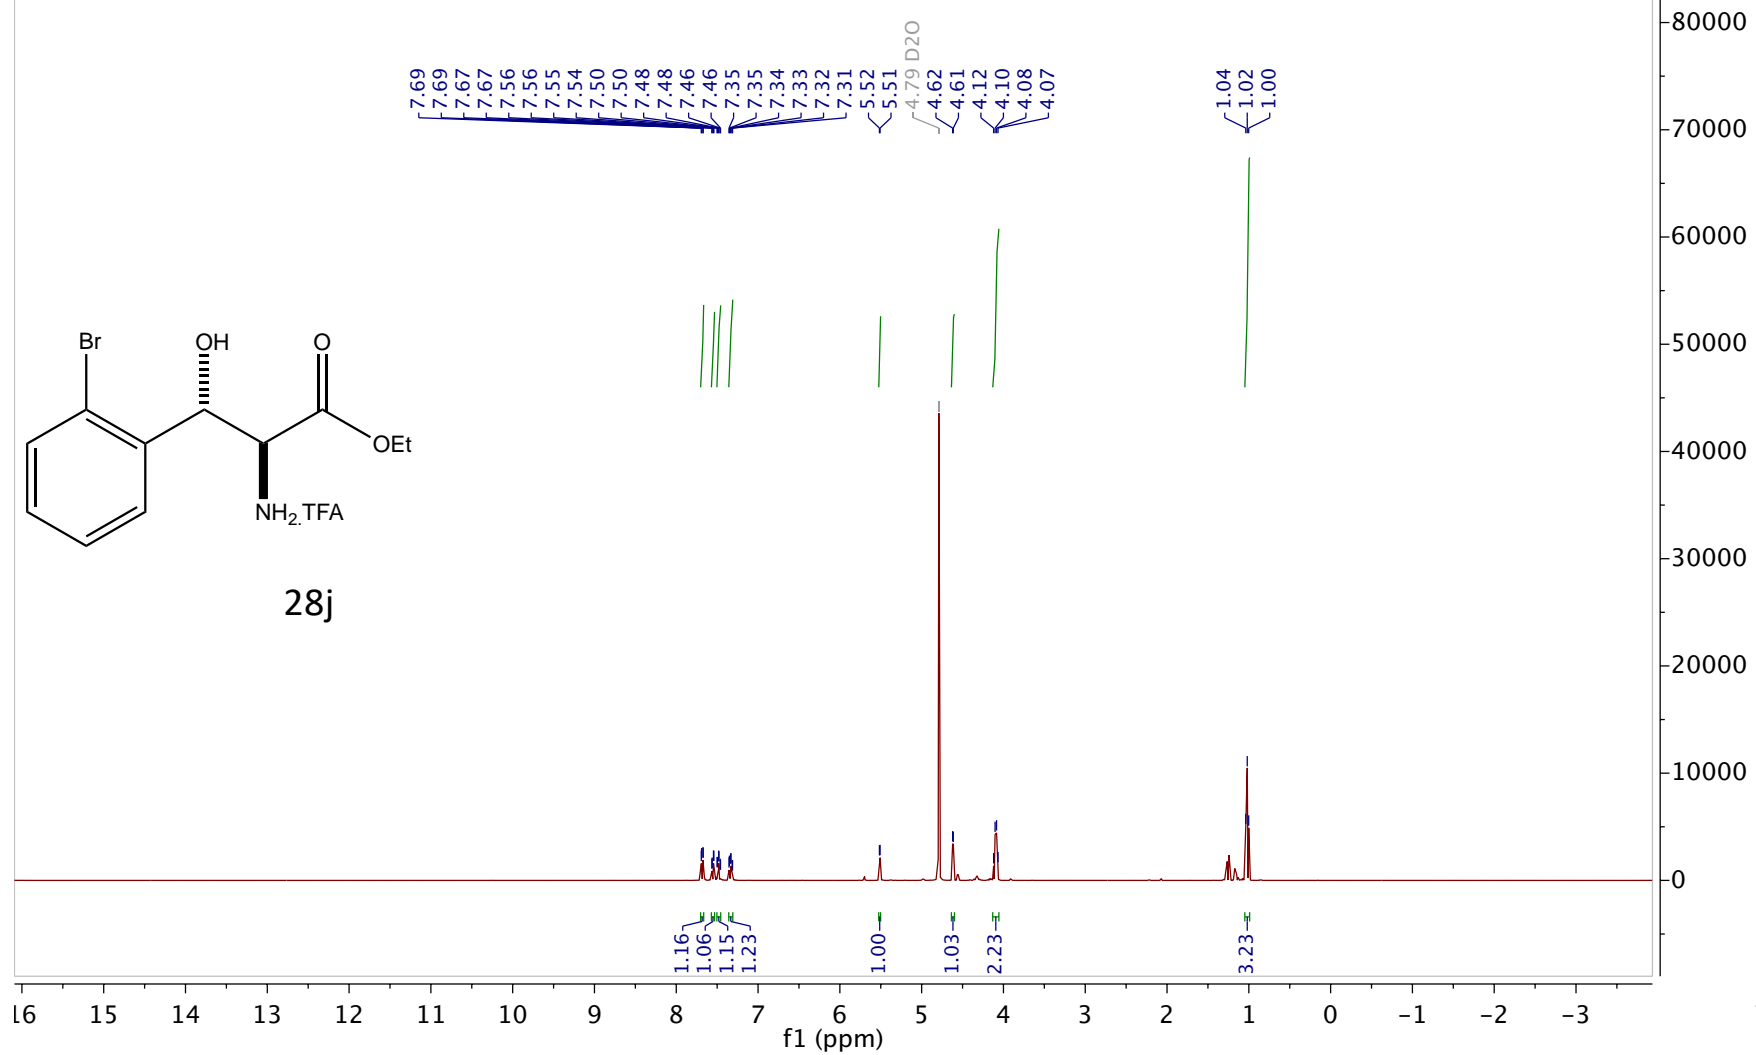

Feb08-2021-50-LS950(C).4.fid  
Instrument AVH400  
Group MGM  
Chemist Liban Saney  
Project Account Code DM7300  
c13acq\_512.crl D2O {C:\NMR} mgmgrp 50

$^{13}\text{C}$  NMR (101 MHz,  $\text{D}_2\text{O}$ )

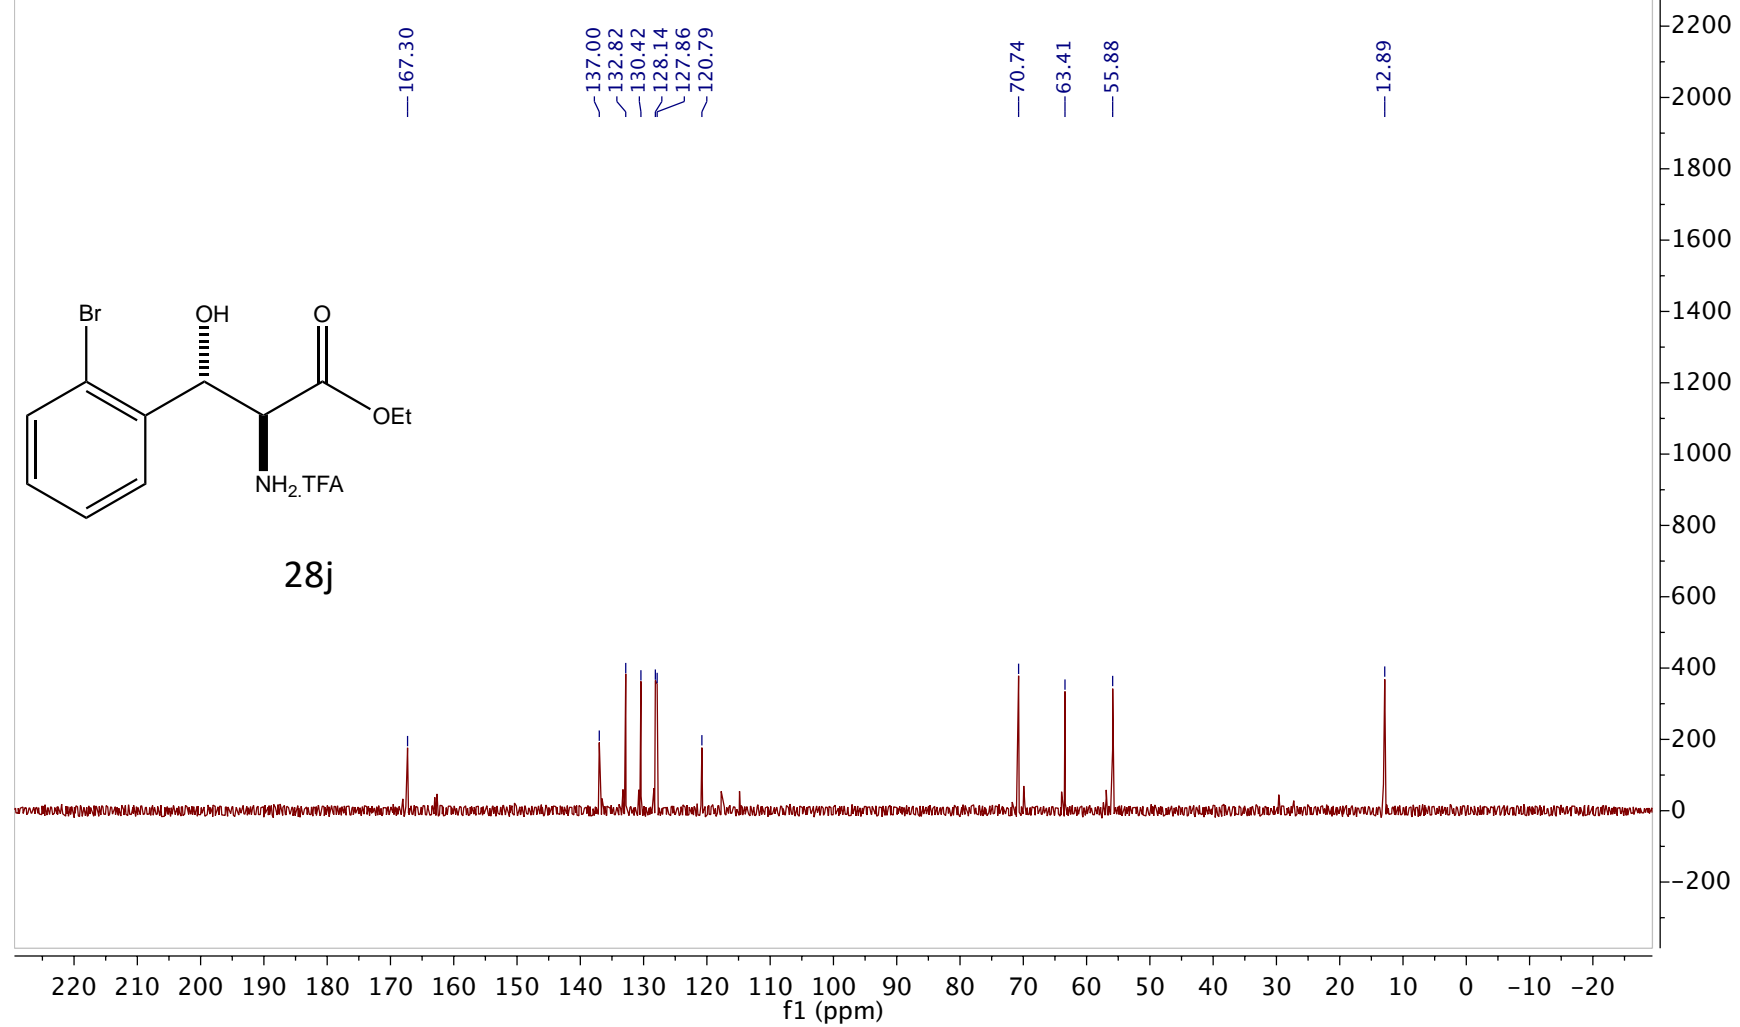

Feb08-2021-52-LS952(C).1.fid  
Instrument AVH400  
Group MGM  
Chemist Liban Saney  
Project Account Code DM7300  
h1acq.crl D2O {C:\NMR} mgmgrp 52

<sup>1</sup>H NMR (400 MHz, D<sub>2</sub>O)

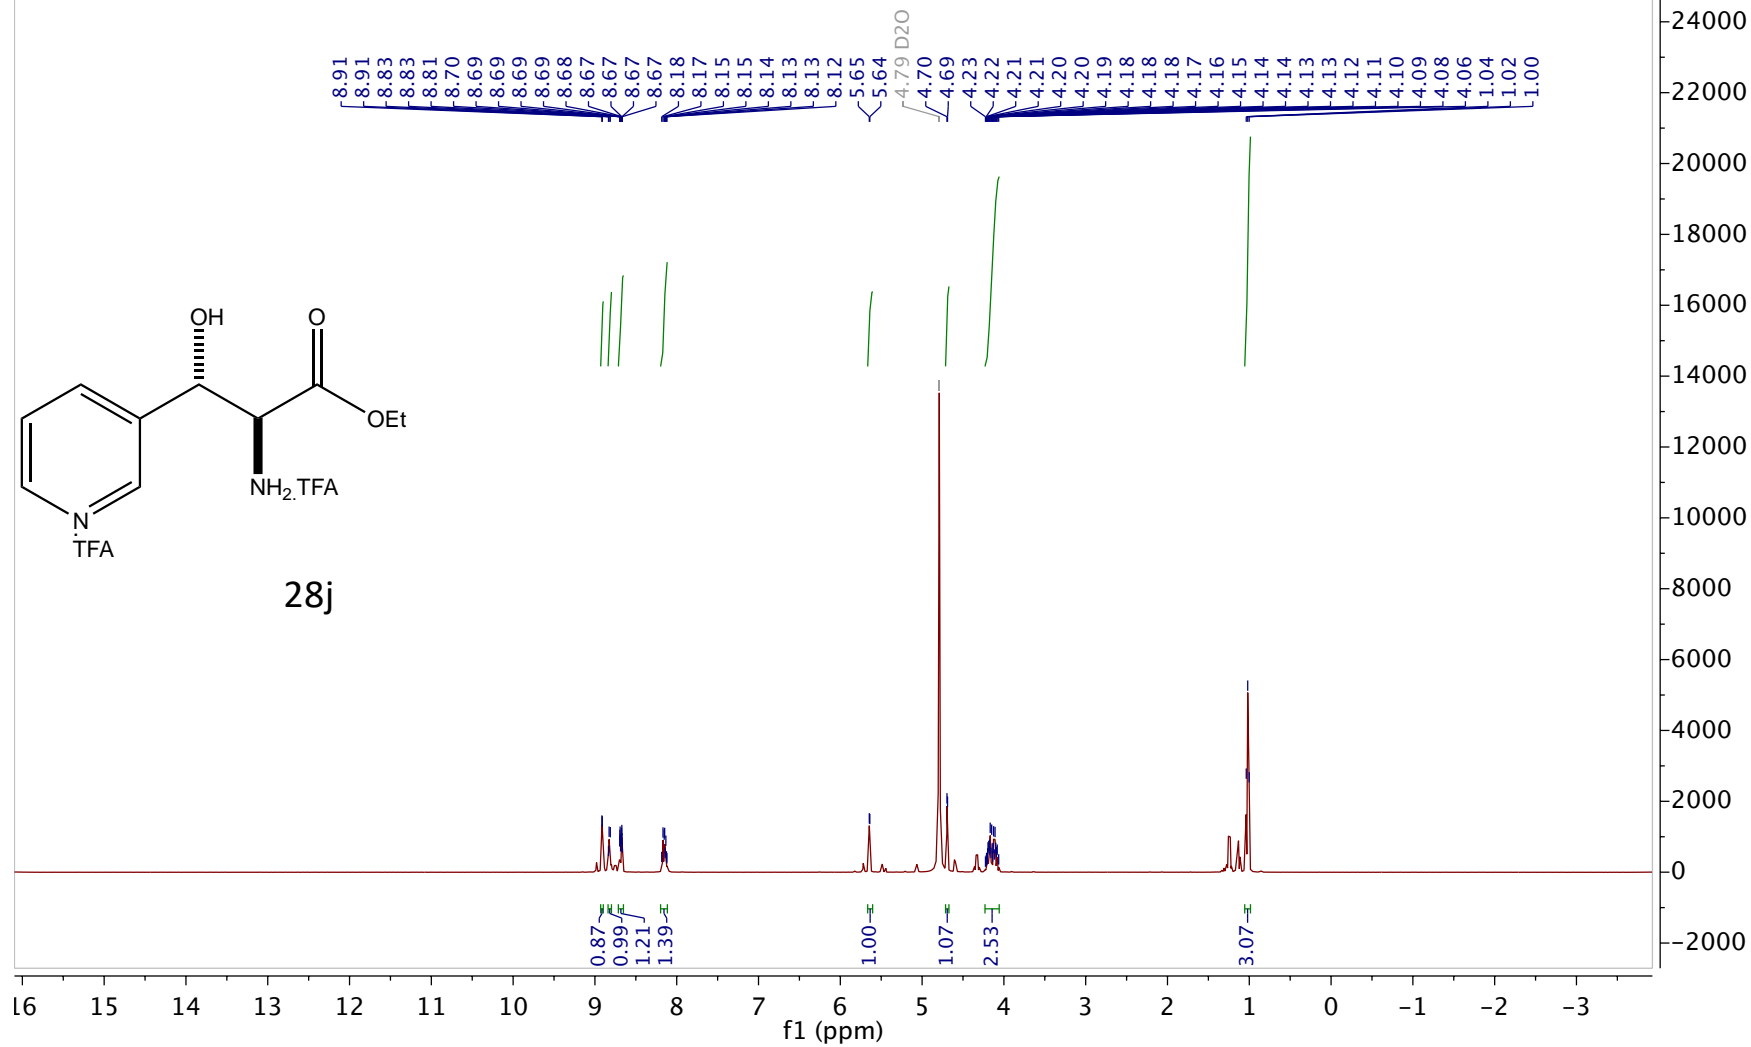

Feb08-2021-52-LS952(C).4.fid  
Instrument AVH400  
Group MGM  
Chemist Liban Saney  
Project Account Code DM7300  
c13acq\_512.crl D2O {C:\NMR} mgmgrp 52

$^{13}\text{C}$  NMR (101 MHz,  $\text{D}_2\text{O}$ )

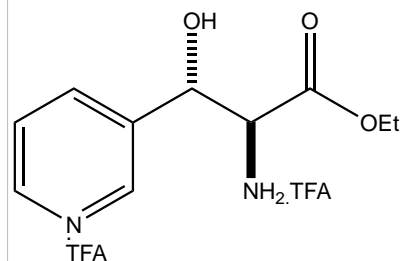

28j

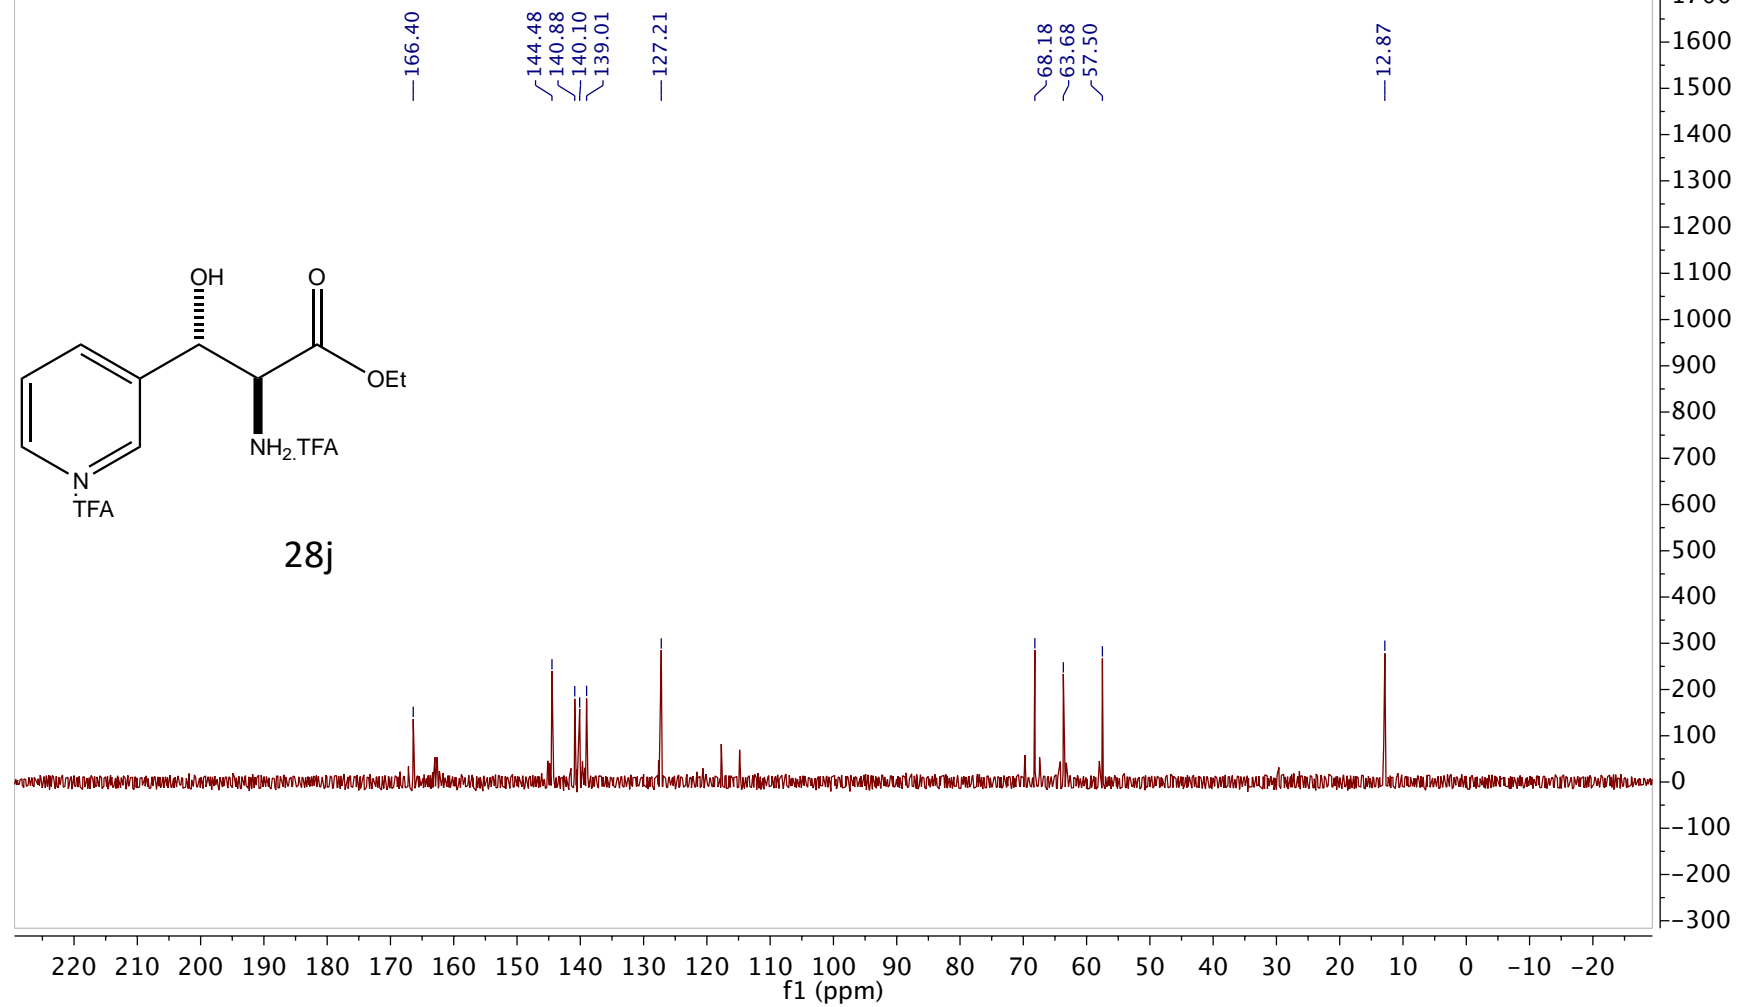

Supplement: d3ob00376k1.pdf [file d3ob00376k1.pdf]
